# Supplementary material for: Application of ethanol alleviates heat damage to leaf growth and yield in tomato
Source: Front Plant Sci. 2024 Feb 19;15:1325365. doi: 10.3389/fpls.2024.1325365 (PMC10909983; doi:10.3389/fpls.2024.1325365)
Supplement: Supplementary file 2 [file Table_1.xlsx]

## Sheet: Sheet1
Supplemental Table S1. Primer sequences used in RT-qPCR analysis.
Target gene	Forward primer (5'-sequence-3')	Reverse primer (5'-sequence-3')
SlLEA (Solyc02g085150)	ACGCCTCTAGTAAAGCCGATCA	GCTCCAACGTTACCTGCAGC
SIDREB2A (Solyc05g052410)	CTGCGGCAAGACATGAAGATAG	CTGACACCTCCTTGGTCTCGTC
SILEA (Solyc09g014750)	CCTGGTGGCACTGGTGGAAA	TGAGTCCGCCTTTTCTACCCA
18s rRNA	CGTTAACGAACGAGACCTCA	CCCAGAACATCTAAGGGCAT
