# Supplementary material for: Application of ethanol alleviates heat damage to leaf growth and yield in tomato
Source: Front Plant Sci. 2024 Feb 19;15:1325365. doi: 10.3389/fpls.2024.1325365 (PMC10909983; doi:10.3389/fpls.2024.1325365)
Supplement: Supplementary file 3 [file Table_2.xlsx]

## Sheet: UP
Supplemental Table S2. Up-regulatedDEGs of E3day vs W3day in shoot (log2 fold change ≧ 1.0, p_value < 0.05, p_adj < 0.05).
GeneID	log2FoldChange	p_value	p_adj	Annotation	IDR
Solyc08g067630.3.1	4.45225	1.05772e-10	8.55169e-08	histone deacetylase-like protein (AHRD V3.3 *** AT2G25625.2)	TRUE
Solyc08g077900.3.1	4.2662	1.94726e-12	5.03795e-09	Expansin-like B1 (AHRD V3.3 *** A0A1U8GH71_CAPAN)	FALSE
Solyc02g084850.3.1	3.03879	6.40896e-09	1.10542e-06	Abscisic acid and environmental stress-inducible protein TAS14 (AHRD V3.3 --* TAS14_SOLLC)	TRUE
Solyc05g056477.1.1	2.95917	0.000693857	0.00951827	NAC domain-containing protein (AHRD V3.3 *** A0A2K3LLY1_TRIPR)	FALSE
Solyc01g105350.3.1	2.5308	1.17285e-07	9.91631e-06	Glycosyltransferase (AHRD V3.3 *** A0A1Q3B719_CEPFO)	FALSE
Solyc08g083130.4.1	2.31839	2.5669e-05	0.000708005	Homeobox-leucine zipper protein HOX6 (AHRD V3.3 *** A0A2G3DAJ5_CAPCH)	TRUE
Solyc08g060920.4.1	2.28126	4.35177e-11	5.62945e-08	IDS4-like	TRUE
Solyc02g085150.4.1	2.27751	0.000110358	0.00228414	Late embryogenesis abundant (LEA) protein (AHRD V3.3 *** A0A1P8B7I6_ARATH)	TRUE
Solyc06g050800.4.1	2.25264	9.47246e-06	0.000325893	Amino acid transporter (AHRD V3.3 *** S8C1J4_9LAMI)	FALSE
Solyc06g074710.1.1	2.19291	0.00021278	0.00388004	Transferase (AHRD V3.3 *** A0A200R9R6_9MAGN)	TRUE
Solyc11g012130.2.1	2.16724	3.51458e-13	2.27323e-09	Early nodulin-like protein 2-like (AHRD V3.3 *** A0A2K3MQQ9_TRIPR)	FALSE
Solyc03g007230.4.1	2.11875	5.28981e-09	9.37384e-07	Protein phosphatase 2C (AHRD V3.3 *** A0A2U1KYU0_ARTAN)	TRUE
Solyc03g095700.1.1	2.07456	6.50817e-08	6.4267e-06	hypothetical protein (AHRD V3.3 *-* AT5G05220.1)	TRUE
Solyc04g009980.4.1	2.06372	1.62783e-06	8.38951e-05	Protein LIGHT-DEPENDENT SHORT HYPOCOTYLS 6 (AHRD V3.3 *** A0A2G3CE82_CAPCH)	TRUE
Solyc01g095140.4.1	2.02453	0.0036011	0.033586	Desiccation protectant protein Lea14-like protein (AHRD V3.3 *** A0A2G3BT76_CAPCH)	FALSE
Solyc10g078440.2.1	1.97386	2.02569e-05	0.000584919	Sigma factor binding protein 1, chloroplastic (AHRD V3.3 *** A0A2G3BI49_CAPCH)	TRUE
Solyc02g062960.4.1	1.94315	5.57453e-05	0.00134037	Homeobox-leucine zipper protein HOX14 (AHRD V3.3 *** A0A1U8FQP7_CAPAN)	TRUE
Solyc08g016415.1.1	1.93651	1.50239e-05	0.000468312	hypothetical protein (AHRD V3.3 *** AT2G38465.1)	TRUE
Solyc06g068130.3.1	1.92974	8.4255e-07	4.95419e-05	Tetratricopeptide repeat (TPR)-like superfamily protein (AHRD V3.3 *-* F4K464_ARATH)	TRUE
Solyc07g063410.3.1	1.91288	4.72939e-05	0.00116755	NAC domain protein (AHRD V3.3 *** S5RDS7_9ROSA)	TRUE
Solyc03g119310.3.1	1.87989	1.57898e-09	4.44037e-07	Unknown protein	TRUE
Solyc06g050810.3.1	1.8722	1.13011e-08	1.66126e-06	LURP-one-like protein (DUF567) (AHRD V3.3 *** A0A1I9LQL5_ARATH)	FALSE
Solyc01g109090.2.1	1.87108	3.53672e-08	4.08492e-06	Unknown protein	TRUE
Solyc03g120420.3.1	1.84298	3.3817e-06	0.000148204	Unknown protein	FALSE
Solyc02g094400.4.1	1.77367	1.39835e-10	1.00494e-07	Glycerophosphodiester phosphodiesterase GDPD2 (AHRD V3.3 *** A0A2G3DA15_CAPCH)	FALSE
Solyc11g069940.1.1	1.71466	2.73228e-07	1.91259e-05	Glutaredoxin (AHRD V3.3 *** A0A118JSL8_CYNCS)	FALSE
Solyc03g116670.3.1	1.69156	5.93681e-12	1.09712e-08	Tetratricopeptide repeat (TPR)-like superfamily protein (AHRD V3.3 *-* F4K464_ARATH)	TRUE
Solyc02g062140.2.1	1.68794	0.000832507	0.0110212	Armadillo repeat only 1 (AHRD V3.3 *** Q9SW41_ARATH)	TRUE
Solyc09g005610.4.1	1.68701	0.000365939	0.00591723	Transcription factor (AHRD V3.3 *** A0A2U1LZI0_ARTAN)	TRUE
Solyc04g040180.3.1	1.66063	8.33149e-07	4.94386e-05	S-adenosyl-L-methionine-dependent methyltransferases superfamily protein (AHRD V3.3 *** A0A1Y1ICE6_KLENI)	FALSE
Solyc03g117330.4.1	1.64448	0.000281819	0.00484176	Proline-tRNA ligase (AHRD V3.3 *** X8JBM9_9HOMO)	TRUE
Solyc08g079430.3.1	1.64189	4.26454e-06	0.000176537	partialcopper-containing amine oxidase	FALSE
Solyc08g082640.2.1	1.63511	5.24681e-05	0.00127341	Cellulose synthase (AHRD V3.3 *** A0A200QCL6_9MAGN)	FALSE
Solyc03g096670.3.1	1.62928	2.43672e-06	0.000115042	Protein phosphatase 2C (AHRD V3.3 *** A0A2U1LBV4_ARTAN)	TRUE
Solyc04g078710.3.1	1.62122	5.18912e-05	0.00126178	Subtilisin-like protease (AHRD V3.3 *** O82777_SOLLC)	TRUE
Solyc07g061800.4.1	1.60213	1.10321e-07	9.45109e-06	Heme-binding-like protein (AHRD V3.3 *** A0A2I0X1C8_9ASPA)	TRUE
Solyc11g072623.1.1	1.58296	1.2603e-12	5.03795e-09	Unknown protein	TRUE
Solyc08g065610.3.1	1.56659	5.69059e-09	9.94777e-07	Vacuolar-processing enzyme (AHRD V3.3 *** A0A2G2VI36_CAPBA)	TRUE
Solyc08g068850.3.1	1.55523	0.00015117	0.002981	proton pump-interactor 1-like (AHRD V3.3 *-* A0A2I4H3B3_9ROSI)	FALSE
Solyc04g054500.3.1	1.54948	4.99996e-10	2.19722e-07	Heavy metal-associated isoprenylated plant protein (AHRD V3.3 *** A0A2R6R672_ACTCH)	FALSE
Solyc04g051690.4.1	1.54534	5.17011e-06	0.000202668	WRKY transcription factor 51	TRUE
Solyc02g087890.4.1	1.53541	0.000841184	0.011115	Unknown protein	FALSE
Solyc07g007130.1.1	1.5266	3.52001e-06	0.000152802	NHL domain protein (AHRD V3.3 *** A0A1P8BDM5_ARATH)	TRUE
Solyc01g108540.3.1	1.52021	5.69471e-08	5.84657e-06	Alpha/beta-Hydrolases superfamily protein (AHRD V3.3 *** A0A2U1KC75_ARTAN)	FALSE
Solyc11g066510.3.1	1.5189	7.57332e-08	7.04842e-06	RING/U-box superfamily protein (AHRD V3.3 *-* A0A2U1KVX7_ARTAN)	FALSE
Solyc12g006530.2.1	1.51544	3.90752e-05	0.000993078	Terpene cyclase/mutase family member (AHRD V3.3 *** A0A2G3BN05_CAPCH)	FALSE
Solyc04g005610.3.1	1.50529	3.75671e-06	0.00016199	NAC domain-containing protein 2 (AHRD V3.3 *** NAP2_SOLLC)	TRUE
Solyc05g045670.4.1	1.49508	1.53038e-09	4.39935e-07	Glucose-6-phosphate/phosphate-translocator (AHRD V3.3 *** O64911_SOLTU)	FALSE
Solyc07g049530.3.1	1.49251	2.37446e-07	1.71598e-05	1-aminocyclopropane-1-carboxylate oxidase 1	FALSE
Solyc08g079420.3.1	1.48044	1.87768e-05	0.000553297	Cytochrome P450 (AHRD V3.3 *** A0A200QB17_9MAGN)	FALSE
Solyc04g080290.3.1	1.47096	1.10419e-11	1.5871e-08	Sec14p-like phosphatidylinositol transfer family protein (AHRD V3.3 *** Q9FRK8_ARATH)	TRUE
Solyc04g082380.4.1	1.46753	4.56624e-06	0.000185169	cytochrome P450 86A8-like (AHRD V3.3 *-* A0A2I4DDX4_9ROSI)	TRUE
Solyc01g098590.3.1	1.44016	1.44115e-07	1.15794e-05	Phosphoglycerate mutase-like protein AT74 (AHRD V3.3 *** A0A2G2YZL9_CAPAN)	FALSE
Solyc04g071800.3.1	1.43791	5.70989e-05	0.00137037	Cytochrome P450 (AHRD V3.3 *-* A0A200Q069_9MAGN)	FALSE
Solyc09g010550.4.1	1.43105	7.72418e-06	0.000275262	dentin sialophosphoprotein-like protein (AHRD V3.3 *-* AT5G02520.2)	TRUE
Solyc04g074000.3.1	1.41472	0.000165187	0.00320369	Receptor protein kinase, putative (AHRD V3.3 *** A0A061FG24_THECC)	FALSE
Solyc08g078060.3.1	1.41309	1.06586e-05	0.000361887	Transmembrane protein (AHRD V3.3 *** Q1PDG7_ARATH)	TRUE
Solyc06g084770.2.1	1.40434	0.00126727	0.0153784	cytochrome P450 CYP72A219 (AHRD V3.3 --* XP_004244272.1)	FALSE
Solyc03g093560.1.1	1.40306	0.000568039	0.00829363	ethylene response factor C.6	TRUE
Solyc07g043230.3.1	1.40144	5.93968e-05	0.00141488	Zinc transporter protein (AHRD V3.3 *** A5BDR3_VITVI)	FALSE
Solyc08g065940.4.1	1.39995	2.28263e-07	1.65888e-05	Zinc finger CCCH domain-containing protein 20 (AHRD V3.3 *** A0A1U8E1G0_CAPAN)	TRUE
Solyc08g075280.4.1	1.39107	4.6312e-07	3.01052e-05	AT4g19390/T5K18_170 (AHRD V3.3 *-* Q94JM4_ARATH)	FALSE
Solyc02g063520.3.1	1.38532	0.00106286	0.0133617	Homeobox-leucine zipper protein HAT22 (AHRD V3.3 *** A0A2G2XBJ3_CAPBA)	FALSE
Solyc09g014450.4.1	1.38317	5.73725e-07	3.60277e-05	Clathrin light chain (AHRD V3.3 *** A0A2G3BKE5_CAPCH)	TRUE
Solyc02g079290.3.1	1.38287	0.000459313	0.0070399	FLOWERING LOCUS T/ TERMINAL FLOWER 1-like protein (AHRD V3.3 *** Q6L5N9_POPNI)	TRUE
Solyc05g009610.1.1	1.37814	0.00283788	0.0281741	Alpha/beta-Hydrolases superfamily protein (AHRD V3.3 *** A0A2U1PVQ0_ARTAN)	FALSE
Solyc07g007620.3.1	1.37641	2.23432e-07	1.63294e-05	Monogalactosyldiacylglycerol synthase 3, chloroplastic (AHRD V3.3 *** A0A2G3BXT4_CAPCH)	FALSE
Solyc04g012160.4.1	1.3721	2.90809e-05	0.000778481	SNF1-related kinase	FALSE
Solyc01g109880.3.1	1.37161	9.41383e-11	8.16507e-08	BZIP transcription factor (AHRD V3.3 *** Q8GTZ1_CAPCH)	TRUE
Solyc04g016420.3.1	1.35915	0.00341344	0.032444	hypothetical protein (AHRD V3.3 *-* AT5G04000.2)	TRUE
Solyc01g150126.1.1	1.35435	0.000272483	0.00475046	Calcium-binding EF-hand (AHRD V3.3 *-* A0A2U1P7H3_ARTAN)	FALSE
Solyc08g007080.4.1	1.35227	1.36967e-05	0.000436406	type I inositol polyphosphate 5-phosphatase 2-like (AHRD V3.3 *** A0A2I4GAB5_9ROSI)	TRUE
Solyc06g062430.3.1	1.34824	0.000100466	0.00213754	Inositol oxygenase (AHRD V3.3 *** A0A2U1PDJ1_ARTAN)	FALSE
Solyc01g109790.3.1	1.34175	1.07693e-08	1.60128e-06	ADP-glucose pyrophosphorylase large subunit 1	FALSE
Solyc05g013410.3.1	1.33695	1.54172e-05	0.000477123	F-box protein (AHRD V3.3 *** A0A2G2VNJ4_CAPBA)	TRUE
Solyc01g080910.2.1	1.33601	5.56692e-05	0.00134037	polyadenylate-binding protein 1-B-binding protein (AHRD V3.3 *** AT5G44860.2)	FALSE
Solyc05g014260.3.1	1.32933	3.71946e-06	0.00016092	Two-component response regulator (AHRD V3.3 *** A0A2G3B918_CAPCH)	TRUE
Solyc02g088180.3.1	1.32037	1.51089e-05	0.000469829	NAC domain-containing protein (AHRD V3.3 *** A0A2G2V9A8_CAPBA)	TRUE
Solyc01g006290.4.1	1.31714	0.000628065	0.00886119	Peroxidase (AHRD V3.3 *** K4ASJ5_SOLLC)	TRUE
Solyc09g061715.1.1	1.31325	0.000100743	0.00213992	hypothetical protein (AHRD V3.3 *-* AT3G24750.1)	TRUE
Solyc08g076970.3.1	1.3131	3.0816e-06	0.000137936	Acetylornithine deacetylase (AHRD V3.3 *** A0A2G2XLB1_CAPBA)	FALSE
Solyc11g068620.2.1	1.30977	2.55321e-06	0.000117743	NAC domain (AHRD V3.3 *** A0A200Q6H1_9MAGN)	FALSE
Solyc06g082010.4.1	1.30798	1.69456e-06	8.63026e-05	Zinc finger transcription factor 48	TRUE
Solyc09g065390.1.1	1.30381	0.00604458	0.0492708	DUF581 domain-containing protein (AHRD V3.3 *** A0A1Q3D4G2_CEPFO)	TRUE
Solyc11g022590.1.1	1.29427	4.09297e-05	0.00102809	trypsin inhibitor-like protein precursor	FALSE
Solyc01g109100.2.1	1.29396	1.73604e-08	2.30201e-06	TMV resistance protein N (AHRD V3.3 *-* XP_020426626.1)	TRUE
Solyc08g080090.3.1	1.29349	7.38348e-09	1.22452e-06	green flesh	TRUE
Solyc03g083400.3.1	1.28251	6.41836e-07	3.95371e-05	CCT motif protein (AHRD V3.3 *** A0A2K3PQC2_TRIPR)	TRUE
Solyc02g092750.3.1	1.28195	3.20755e-07	2.1724e-05	Protein phosphatase 2C family protein (AHRD V3.3 *** A0A2U1MLG3_ARTAN)	FALSE
Solyc04g006970.4.1	1.28159	0.00104505	0.013189	Phosphoenolpyruvate carboxylase (AHRD V3.3 *** A6YM33_RICCO)	TRUE
Solyc08g076860.3.1	1.27811	5.08089e-06	0.000200998	PLATZ transcription factor family protein (AHRD V3.3 *** F4IEB6_ARATH)	TRUE
Solyc08g006470.4.1	1.27375	7.45176e-05	0.00169116	Zinc finger protein (AHRD V3.3 *** A0A2U1NTB4_ARTAN)	TRUE
Solyc01g098420.3.1	1.27004	0.002338	0.0241762	Chitin elicitor receptor kinase 1 (AHRD V3.3 *-* A0A2G2YZ64_CAPAN)	FALSE
Solyc03g007250.1.1	1.26026	4.07874e-05	0.00102651	Cyclic nucleotide gated channel 1 (AHRD V3.3 *-* A0A2U1KHS4_ARTAN)	FALSE
Solyc08g080170.3.1	1.2422	1.08999e-06	6.18426e-05	3-hydroxy-3-methylglutaryl coenzyme A synthase (AHRD V3.3 *** A0A2G3DBH4_CAPCH)	FALSE
Solyc04g009860.4.1	1.23963	6.38164e-05	0.00148744	2-oxoglutarate (2OG) and Fe(II)-dependent oxygenase superfamily protein (AHRD V3.3 *** A0A2U1QA13_ARTAN)	FALSE
Solyc01g096810.3.1	1.23119	4.8068e-08	5.26956e-06	EIL3	TRUE
Solyc11g010330.3.1	1.23093	2.13512e-06	0.000102825	RING/U-box superfamily protein (AHRD V3.3 *-* F4JJ02_ARATH)	TRUE
Solyc01g006300.3.1	1.22972	7.09656e-05	0.00162193	LECEVI1A	TRUE
Solyc03g115930.3.1	1.22658	0.000106054	0.00221993	Calcium-binding EF-hand family protein (AHRD V3.3 *-* A0A2U1NCV0_ARTAN)	FALSE
Solyc10g085590.1.1	1.22037	3.45329e-06	0.00015041	Protein ELC (AHRD V3.3 *** A0A2G3BFL9_CAPCH)	TRUE
Solyc07g062810.4.1	1.22032	1.89194e-06	9.40074e-05	D-amino-acid transaminase, chloroplastic (AHRD V3.3 *** A0A2G2Z4Z6_CAPAN)	FALSE
Solyc02g091380.1.1	1.21543	0.000830365	0.011017	transmembrane protein (AHRD V3.3 *** AT1G49000.1)	FALSE
Solyc11g069700.2.1	1.21524	2.97962e-05	0.00079473	Elongation factor 1-alpha (AHRD V3.3 *** A0A1U8EL12_CAPAN)	TRUE
Solyc07g065270.1.1	1.20456	0.00468215	0.0406499	GRAS7	TRUE
Solyc02g084840.3.1	1.19701	6.30217e-07	3.91946e-05	Dehydrin (AHRD V3.3 *** A0A2R4KWH2_9SOLN)	TRUE
Solyc09g074270.3.1	1.19062	0.000128299	0.00258919	Gibberellin receptor (AHRD V3.3 *** E3VJP7_9FABA)	FALSE
Solyc07g062500.3.1	1.18711	2.46499e-06	0.000115953	Cytochrome (AHRD V3.3 *** A0A2G2WF27_CAPBA)	FALSE
Solyc02g089630.3.1	1.1854	0.00388349	0.0354805	Proline dehydrogenase (AHRD V3.3 *** A0A2G2XIU2_CAPBA)	FALSE
Solyc04g081890.1.1	1.1756	3.89942e-06	0.000164309	RING/U-box superfamily protein (AHRD V3.3 *** A0A2U1PXB9_ARTAN)	FALSE
Solyc01g086670.3.1	1.17263	0.000604376	0.00862612	Unknown protein	FALSE
Solyc09g007150.3.1	1.16981	1.57195e-10	1.07025e-07	Glutathione S-transferase (AHRD V3.3 *** A0A200QHH9_9MAGN)	FALSE
Solyc09g007080.3.1	1.1676	0.00163886	0.0183833	Protein phosphatase 2C family protein (AHRD V3.3 *** A0A2U1Q2B2_ARTAN)	FALSE
Solyc11g068950.3.1	1.15697	1.94302e-05	0.00056601	BEL1-like homeodomain protein 1 (AHRD V3.3 *** A0A2G2YH01_CAPAN)	TRUE
Solyc06g008870.2.1	1.15529	0.000228877	0.00410646	Gibberellin receptor (AHRD V3.3 *** E3VJP7_9FABA)	FALSE
Solyc06g009110.3.1	1.15456	0.000193364	0.00358287	Eukaryotic aspartyl protease family protein (AHRD V3.3 *** A0A2U1QF58_ARTAN)	FALSE
Solyc07g053550.3.1	1.15016	1.73852e-05	0.000520591	Glutaredoxin-C9 (AHRD V3.3 *** A0A2G2WE57_CAPBA)	FALSE
Solyc03g083420.4.1	1.15015	2.19529e-05	0.000621406	OBP3-responsive protein 1 (AHRD V3.3 *** AT5G53450.1)	TRUE
Solyc10g086500.1.1	1.14346	5.28681e-05	0.00128072	steroid 5 alpha reductase DET2	FALSE
Solyc10g055760.2.1	1.13487	2.13821e-06	0.000102825	NAC domain-containing protein 2 (AHRD V3.3 *** A0A1U8EDX1_CAPAN)	TRUE
Solyc06g074090.3.1	1.13288	4.60569e-10	2.12783e-07	7-dehydrocholesterol reductase (AHRD V3.3 *** A0A2G2WMN4_CAPBA)	FALSE
Solyc09g005730.4.1	1.13176	0.000795164	0.0106483	Plant protein 1589 of Uncharacterized protein function (AHRD V3.3 *** A0A061EZD3_THECC)	TRUE
Solyc12g009480.2.1	1.13068	0.00063835	0.00896601	SPX domain-containing protein (AHRD V3.3 *** A0A1Q3BK26_CEPFO)	TRUE
Solyc01g105450.4.1	1.13058	0.00276119	0.027646	ABC transporter G family member 11 (AHRD V3.3 *** A0A2G2VAJ3_CAPBA)	FALSE
Solyc03g113430.3.1	1.129	1.10366e-05	0.000368914	Protein NRT1/ PTR FAMILY 2.9 (AHRD V3.3 *** A0A2G2WRK6_CAPBA)	FALSE
Solyc03g083000.3.1	1.12225	0.00249255	0.0254488	Transmembrane protein (AHRD V3.3 *-* F4IJ67_ARATH)	TRUE
Solyc06g067980.3.1	1.11598	0.000848854	0.0111987	repressed By RIM101 protein 1 (AHRD V3.3 --* XP_011091441.1)	TRUE
Solyc04g007980.3.1	1.11578	8.07451e-06	0.000283075	2-oxoglutarate (2OG) and Fe(II)-dependent oxygenase superfamily protein (AHRD V3.3 *** O80850_ARATH)	TRUE
Solyc07g063460.3.1	1.11549	5.22822e-08	5.54362e-06	S-adenosyl-L-methionine-dependent methyltransferases superfamily protein (AHRD V3.3 *** A0A2U1LBB5_ARTAN)	FALSE
Solyc01g105660.4.1	1.11475	6.37209e-06	0.00023709	2-oxoglutarate (2OG) and Fe(II)-dependent oxygenase superfamily protein (AHRD V3.3 *** F4INZ9_ARATH)	FALSE
Solyc10g078590.2.1	1.11454	1.20179e-05	0.000393577	Jacalin-related lectin 3 (AHRD V3.3 *-* A0A2G3BI13_CAPCH)	TRUE
Solyc02g063440.3.1	1.11057	3.80816e-06	0.000163662	Unknown protein	FALSE
Solyc03g117860.3.1	1.1027	0.00154664	0.0177535	RBR-type E3 ubiquitin transferase (AHRD V3.3 *** A0A2G3A2R7_CAPAN)	FALSE
Solyc10g079640.2.1	1.0852	4.56712e-05	0.00114275	IAA-amino acid hydrolase ILR1-like 6 (AHRD V3.3 *** A0A2G2YNX9_CAPAN)	FALSE
Solyc03g007870.3.1	1.08466	2.84629e-07	1.96896e-05	heavy metal-associated isoprenylated plant protein 3-like (AHRD V3.3 *** A0A1U8G733_CAPAN)	TRUE
Solyc03g119600.1.1	1.08248	1.03241e-08	1.55293e-06	NIMIN2b protein (AHRD V3.3 *** Q0MR95_TOBAC)	TRUE
Solyc10g006800.4.1	1.07916	0.00251118	0.0256188	Cyclic nucleotide-gated ion channel 4 (AHRD V3.3 *** A0A2G2V344_CAPBA)	TRUE
Solyc04g077400.4.1	1.07448	0.00387968	0.0354805	ERD (Early-responsive to dehydration stress) family protein (AHRD V3.3 *** A0A1P8B4I8_ARATH)	TRUE
Solyc03g033840.4.1	1.06118	2.91007e-05	0.000778481	AAA-ATPase At3g50940-like (AHRD V3.3 *** A0A2I4EX93_9ROSI)	FALSE
Solyc10g009110.1.1	1.05953	0.00211723	0.0224278	ethylene response factor F.5	TRUE
Solyc02g071090.3.1	1.05616	0.000138265	0.00276445	Purine permease (AHRD V3.3 *** A0A2U1LZ22_ARTAN),Pfam:PF16913	FALSE
Solyc03g094160.3.1	1.05352	0.0011829	0.0145043	metacaspase-1-like (AHRD V3.3 *** A0A1U7W9C1_NICSY),Pfam:PF00656	FALSE
Solyc05g052980.4.1	1.05152	7.47002e-06	0.00026694	Protein phosphatase 2C (AHRD V3.3 *** A0A2U1LBV4_ARTAN)	TRUE
Solyc04g081900.4.1	1.04762	0.000339712	0.00557645	Thioredoxin_8 domain-containing protein (AHRD V3.3 *** A0A1Q3C5I0_CEPFO)	TRUE
Solyc03g115990.3.1	1.04629	3.97519e-05	0.00100382	Malate dehydrogenase (AHRD V3.3 *** O48906_MEDSA)	FALSE
Solyc07g017610.3.1	1.04267	0.00182379	0.0200617	Saccharopine dehydrogenase / Homospermidine synthase (AHRD V3.3 *** A0A200PV89_9MAGN)	FALSE
Solyc12g100070.3.1	1.03778	0.00440048	0.038777	hemK methyltransferase family member 2-like (AHRD V3.3 *** A0A2I4GF88_9ROSI)	FALSE
Solyc02g092070.3.1	1.03409	0.00361906	0.0336587	Growth-regulating factor 8 (AHRD V3.3 *** A0A2G3AB32_CAPAN)	TRUE
Solyc02g068200.1.1	1.02729	0.00186127	0.0203392	TCP transcription factor 18	TRUE
Solyc10g076180.1.1	1.02365	8.07472e-06	0.000283075	ovate family protein 20	TRUE
Solyc08g074490.4.1	1.01582	1.95146e-05	0.00056601	Nucleotide-diphospho-sugar transferase, nucleotide-diphospho-sugar transferase (AHRD V3.3 *** A0A2U1NHY0_ARTAN)	FALSE
Solyc07g043500.1.1	1.01512	8.27813e-05	0.00183295	Glycosyltransferase (AHRD V3.3 *** C5NN15_CATRO)	TRUE
Solyc01g066290.2.1	1.01219	0.00206844	0.0221136	Unknown protein	TRUE
Solyc08g076730.4.1	1.01173	1.481e-05	0.000462757	Tetratricopeptide repeat (TPR)-like superfamily protein (AHRD V3.3 *-* Q0WUZ1_ARATH)	TRUE
Solyc03g123390.4.1	1.00882	4.8208e-06	0.000194881	Alpha/beta-Hydrolases superfamily protein (AHRD V3.3 *** Q9LNR2_ARATH)	FALSE
Solyc05g007140.3.1	1.00252	7.15657e-08	6.90876e-06	Protein kinase 2B, chloroplastic (AHRD V3.3 *** A0A2G3B7X5_CAPCH)	TRUE
Solyc10g008410.1.1	1.00161	1.66983e-06	8.53792e-05	E3 ubiquitin-protein ligase RMA1H1 (AHRD V3.3 *** A0A2G3BCW2_CAPCH)	TRUE

## Sheet: DOWN
Supplemental Table S2. Down-regulated DEGs of E3d vs W3d in shoots (log2 fold change ≦ -1.0, p_value < 0.05, p adj < 0.05).
Geneid	log2FoldChange	p_value	p_adj	Annotation
Solyc02g085940.4.1	-3.46609	2.68668e-05	0.000731683	Ribulose bisphosphate carboxylase small chain (AHRD V3.3 *** A0A2G2XBI7_CAPBA)
Solyc07g009585.1.1	-3.10914	0.00205673	0.0220065	Unknown protein
Solyc04g150172.1.1	-1.66147	0.000181745	0.00341724	Protein RADIALIS-like 6 (AHRD V3.3 *** A0A1U8GJH9_CAPAN)
Solyc03g096760.1.1	-1.62493	1.29316e-09	3.98294e-07	Protein RESPONSE TO LOW SULFUR 2 (AHRD V3.3 *-* LSU2_ARATH)
Solyc11g032050.2.1	-1.53995	2.29911e-05	0.000646551	GDSL esterase/lipase (AHRD V3.3 *** A0A2G3CP09_CAPCH)
Solyc06g061200.1.1	-1.44855	3.29395e-05	0.000865252	glycine-rich protein 1
Solyc04g017720.3.1	-1.416	1.18438e-06	6.57562e-05	Gibberellin regulated protein (AHRD V3.3 *** A0A2U1PE48_ARTAN)
Solyc03g123410.1.1	-1.31599	2.11691e-05	0.000607022	Germin-like protein 1 (AHRD V3.3 *** A0A1U8G802_CAPAN)
Solyc12g006050.2.1	-1.28674	8.63629e-07	5.05516e-05	Protein NRT1/ PTR FAMILY 6.4 (AHRD V3.3 *** A0A2G2X304_CAPBA)
Solyc08g078900.1.1	-1.27498	3.85498e-06	0.000163918	Bifunctional inhibitor/lipid-transfer protein/seed storage 2S albumin superfamily protein (AHRD V3.3 *** A0A2U1PU47_ARTAN)
Solyc03g121900.1.1	-1.25004	0.0016565	0.0185368	Bifunctional inhibitor/plant lipid transfer protein/seed storage helical domain containing protein (AHRD V3.3 *** A0A2P5DNS6_PARAD)
Solyc04g071960.3.1	-1.24859	1.08197e-05	0.000364489	NAD(P)-binding Rossmann-fold superfamily protein (AHRD V3.3 *** A0A2U1QER6_ARTAN),Pfam:PF13561
Solyc02g070990.1.1	-1.24397	8.09093e-05	0.00180456	Chlorophyll a-b binding protein, chloroplastic (AHRD V3.3 *** A0A2G3A7J8_CAPAN)
Solyc06g069730.3.1	-1.23559	6.41935e-05	0.00149354	Chlorophyll a-b binding protein, chloroplastic (AHRD V3.3 *** A0A1U8GPF4_CAPAN)
Solyc02g089350.3.1	-1.22502	1.71969e-05	0.000517346	Gibberellin regulated protein (AHRD V3.3 *** A0A2U1PE48_ARTAN)
Solyc02g071000.1.1	-1.20033	7.70394e-05	0.00173924	Chlorophyll a-b binding protein, chloroplastic (AHRD V3.3 *** A0A2G3A7J8_CAPAN)
Solyc06g083480.4.1	-1.19685	0.00116703	0.0143369	NAD(P)-binding Rossmann-fold superfamily protein (AHRD V3.3 *** A0A1P8AYK7_ARATH)
Solyc08g076883.1.1	-1.19371	4.87173e-06	0.000195716	Unknown protein
Solyc04g050440.3.1	-1.17781	1.95109e-05	0.00056601	ammonium transporter
Solyc06g049050.3.1	-1.16383	0.000154628	0.00303531	expansin 2
Solyc07g041720.1.1	-1.14598	0.000269503	0.0047112	Germin-like protein (AHRD V3.3 *** S8E4K0_9LAMI)
Solyc01g098630.3.1	-1.12481	0.000699996	0.00957204	Mitochondrial inner membrane translocase complex, subunit Tim44-related protein (AHRD V3.3 *** B3H4A1_ARATH)
Solyc03g044660.3.1	-1.10919	0.00011526	0.0023742	4-hydroxy-tetrahydrodipicolinate synthase (AHRD V3.3 *** Q1PDD5_9ORYZ)
Solyc05g052300.4.1	-1.10602	0.000901807	0.011748	Amino acid transporter (AHRD V3.3 *** S8C1J4_9LAMI)
Solyc02g070970.1.1	-1.10221	0.000301516	0.00510335	Chlorophyll a-b binding protein, chloroplastic (AHRD V3.3 *** A0A2G3A7J8_CAPAN)
Solyc05g053100.3.1	-1.09656	0.000171075	0.00327583	Dihydrolipoyl dehydrogenase-like protein (AHRD V3.3 *** A0A2K3PDU3_TRIPR)
Solyc11g066390.2.1	-1.09365	2.65601e-05	0.000728072	superoxide dismutase 3
Solyc04g077130.1.1	-1.09298	2.22072e-06	0.000106397	50S ribosomal protein 6, chloroplastic (AHRD V3.3 *** A0A2G3CPG8_CAPCH)
Solyc01g111010.4.1	-1.08785	0.000303149	0.00511283	X-intrinsic protein 1.6
Solyc06g150132.1.1	-1.08311	0.000644932	0.00900954	Calcium-binding protein (AHRD V3.3 *-* Q9SCA1_LOTJA)
Solyc09g059240.3.1	-1.07838	0.00124907	0.0152147	Cytochrome P450 (AHRD V3.3 *** A0A2U1Q1Z2_ARTAN)
Solyc10g008120.4.1	-1.07283	8.47734e-05	0.00186819	O-methyltransferase (AHRD V3.3 *** A0A1B4Z3W3_9ROSA)
Solyc10g074540.1.1	-1.06026	0.00116109	0.0142774	Protein EXORDIUM-like 3 (AHRD V3.3 *** A0A1U8DVK9_CAPAN)
Solyc07g006710.2.1	-1.04664	0.00141562	0.0167085	Pathogenesis-related protein PR-1 (AHRD V3.3 *** A0A2G3BX31_CAPCH)
Solyc08g067840.3.1	-1.04345	0.000177977	0.00337607	Photosystem II reaction center PsbP family protein (AHRD V3.3 *** A0A0F7GYP2_9ROSI)
Solyc04g050730.3.1	-1.02887	1.14245e-05	0.000377974	GDSL esterase/lipase (AHRD V3.3 *** A0A2R6PKD3_ACTCH)
Solyc02g070950.1.1	-1.02513	0.000356639	0.00581775	Chlorophyll a-b binding protein, chloroplastic (AHRD V3.3 *** A0A2G3A7J8_CAPAN)
Solyc10g045310.2.1	-1.02497	6.04472e-06	0.00022731	DUF3531 domain-containing protein (AHRD V3.3 *** A0A1Q3B327_CEPFO)
Solyc05g014000.4.1	-1.02463	1.94827e-08	2.47087e-06	Pectate lyase (AHRD V3.3 *** A0A2G3B8Z4_CAPCH)
Solyc05g009300.1.1	-1.02355	6.57596e-07	4.01258e-05	transmembrane protein (AHRD V3.3 *-* AT2G29180.1)
Solyc02g070980.1.1	-1.01229	0.000683282	0.00940693	Chlorophyll a-b binding protein, chloroplastic (AHRD V3.3 *-* A0A2G3A7J8_CAPAN)
Solyc03g118410.3.1	-1.01096	1.70744e-05	0.00051486	Acyl carrier protein (AHRD V3.3 *** A0A1U8G884_CAPAN)
Solyc08g005100.3.1	-1.00335	0.00052289	0.00777484	PLATZ transcription factor family protein (AHRD V3.3 *** F4IEB6_ARATH)
Solyc03g116060.4.1	-1.00271	0.00134873	0.01611	Gibberellin-regulated protein 6 (AHRD V3.3 *** A0A2G3CZG9_CAPCH)
Solyc06g065380.4.1	-1.00071	0.0036517	0.0338869	Calcium-dependent protein kinase (AHRD V3.3 *** Q6EE27_9ROSI)
Solyc02g090540.4.1	-1.00024	0.0019961	0.0214822	Glucose/ribitol dehydrogenase (AHRD V3.3 *** A0A2U1NV71_ARTAN)
