# Supplementary material for: Application of ethanol alleviates heat damage to leaf growth and yield in tomato
Source: Front Plant Sci. 2024 Feb 19;15:1325365. doi: 10.3389/fpls.2024.1325365 (PMC10909983; doi:10.3389/fpls.2024.1325365)
Supplement: Supplementary file 4 [file Table_3.xlsx]

## Sheet: UP
Supplemental Table S3. Up-regulated DEGs of E3 vs W3 in root (log2 fold change ≧ 1.0, p_value < 0.05, p_adj < 0.05).
GeneID	log2FoldChange	p_value	p_adj	Annotation	IDR
Solyc03g031630.3.1	6.48028	5.69974e-10	9.18028e-08	Calcium-binding EF-hand family protein-like (AHRD V3.3 *** Q6ZFI7_ORYSJ)	FALSE
Solyc10g050980.1.1	6.4053	1.13754e-12	4.79487e-10	Unknown protein	TRUE
Solyc06g072210.1.1	6.20456	1.36047e-05	0.000377482	Miraculin (AHRD V3.3 *** A0A1U8H778_CAPAN)	FALSE
Solyc02g089140.3.1	6.03825	8.05422e-16	1.25333e-12	B12D protein (AHRD V3.3 *** A0A2U1M961_ARTAN)	FALSE
Solyc12g006560.3.1	5.9021	0.000180699	0.00301079	Early nodulin-93 (AHRD V3.3 *** A0A1U8E1Q0_CAPAN)	FALSE
Solyc07g054800.1.1	5.76202	2.19426e-06	8.60803e-05	Wound induced protein (AHRD V3.3 *** Q04129_SOLLC)	FALSE
Solyc10g050990.2.1	5.5663	2.22169e-10	4.40139e-08	Unknown protein	TRUE
Solyc09g082600.3.1	5.54775	0.000237537	0.00369086	Chlorophyllase-2, chloroplastic (AHRD V3.3 *** A0A1U8FCR3_CAPAN)	FALSE
Solyc11g071740.2.1	5.00368	3.62679e-09	4.17161e-07	Calcium-binding protein CML38 (AHRD V3.3 *** A0A2G3BAR0_CAPCH)	TRUE
Solyc04g025530.3.1	4.50833	1.69772e-11	4.67133e-09	Glutamate decarboxylase (AHRD V3.3 *** A0A2G2YVX0_CAPAN)	FALSE
Solyc09g090685.1.1	4.4699	1.78596e-06	7.20602e-05	Unknown protein	FALSE
Solyc07g042100.3.1	4.3918	0.00020067	0.00325667	hypothetical protein (AHRD V3.3 *** AT1G72490.2)	TRUE
Solyc08g077740.1.1	4.12157	0.00063203	0.00775784	I-7 (AHRD V3.3 *** A0A0K0VHK2_SOLPN)	TRUE
Solyc07g061720.3.1	4.02887	3.13908e-14	2.47505e-11	gibberellin 2-oxidase 4	FALSE
Solyc05g047530.3.1	4.00354	6.38436e-06	0.000203672	trans-cinnamate 4-monooxygenase	FALSE
Solyc02g085660.1.1	3.97694	1.66374e-08	1.4649e-06	Glycosyltransferase (AHRD V3.3 *** A0A2I4ENI5_9ROSI)	FALSE
Solyc08g077910.3.1	3.93871	2.38734e-13	1.35131e-10	Expansin-like B1 (AHRD V3.3 *** A0A2G2VI71_CAPBA)	FALSE
Solyc11g069680.1.1	3.92115	0.000882015	0.0100189	Acyltransferase-like protein (AHRD V3.3 *** Q589X8_TOBAC)	FALSE
Solyc07g052120.4.1	3.70172	0.00336415	0.0276544	Sesquiterpene synthase (AHRD V3.3 *** A0A2G3AYX6_CAPCH)	FALSE
Solyc06g050870.3.1	3.62238	1.00517e-06	4.54672e-05	Hypoxia-responsive family protein (AHRD V3.3 *** B6THW4_MAIZE)	FALSE
Solyc08g006410.4.1	3.61569	1.5607e-07	9.45534e-06	Glycosyltransferase (AHRD V3.3 *** B9VJL9_9SOLA)	FALSE
Solyc06g054620.4.1	3.59919	0.000783607	0.009151	Zinc finger transcription factor 43	TRUE
Solyc12g009680.2.1	3.59113	0.0010941	0.0118121	Heptahelical transmembrane protein 1 (AHRD V3.3 *** A0A1U8E8P1_CAPAN)	FALSE
Solyc11g009100.2.1	3.50438	0.000164673	0.00280549	ABC transporter-like (AHRD V3.3 *-* A0A200QYY8_9MAGN)	TRUE
Solyc03g117570.3.1	3.47422	0.00180488	0.0173491	Pentatricopeptide repeat-containing protein, mitochondrial (AHRD V3.3 *** A0A2G3CZN8_CAPCH)	FALSE
Solyc09g009895.1.1	3.44453	0.00126689	0.0131329	Unknown protein	FALSE
Solyc09g005560.4.1	3.42604	0.00134243	0.0137017	Trihelix transcription factor GT-3b (AHRD V3.3 *-* A0A1U8EDU3_CAPAN)	TRUE
Solyc06g009040.4.1	3.39357	4.04432e-10	7.35065e-08	Glutathione S-transferase (AHRD V3.3 *** A0A2G3C3Q3_CAPCH)	FALSE
Solyc06g007580.1.1	3.3883	0.00628833	0.0440984	PDDEXK-like protein (AHRD V3.3 *** A0A2U1LF29_ARTAN)	TRUE
Solyc05g016690.3.1	3.38436	4.50657e-05	0.00100202	Nudix hydrolase (AHRD V3.3 *** A0A2U1KQS6_ARTAN)	FALSE
Solyc01g009580.2.1	3.36363	2.20723e-08	1.84504e-06	Terminal flower 1 (AHRD V3.3 *** A0A2Z4I2Q4_CITLI)	FALSE
Solyc01g005500.3.1	3.3474	0.000315521	0.00461449	NAD(P)-binding Rossmann-fold superfamily protein (AHRD V3.3 *** A0A2U1PL19_ARTAN),Pfam:PF13561	FALSE
Solyc06g052070.3.1	3.25592	0.00266704	0.0231943	Transducin/WD40 repeat-like superfamily protein (AHRD V3.3 *** A0A2U1PL09_ARTAN)	TRUE
Solyc07g008240.3.1	3.24597	8.6377e-07	4.00753e-05	Non-symbiotic hemoglobin like (AHRD V3.3 *** A0A2R6R1Q2_ACTCH)	FALSE
Solyc01g099490.1.1	3.24418	0.00438536	0.0336869	ATP-dependent DNA helicase (AHRD V3.3 *-* A0A2G2XW06_CAPAN)	FALSE
Solyc09g082280.3.1	3.23824	1.00523e-06	4.54672e-05	Lipid transfer protein (AHRD V3.3 *** K7WVB3_SOLTU)	TRUE
Solyc11g072310.2.1	3.2316	2.50774e-06	9.62809e-05	gibberellin 20-oxidase-3	FALSE
Solyc06g082420.4.1	3.23054	0.00328833	0.0271551	Peroxidase (AHRD V3.3 *** K4CAA1_SOLLC)	FALSE
Solyc05g053860.4.1	3.2104	0.000343964	0.00491223	Organic cation/carnitine transporter 3 (AHRD V3.3 *** A0A2G2WUV1_CAPBA)	FALSE
Solyc04g077620.1.1	3.21022	3.17566e-06	0.000116506	Uncharacterized conserved protein UCP031279 (AHRD V3.3 -** AT1G10140.1)	TRUE
Solyc09g075043.1.1	3.18871	2.2705e-06	8.87198e-05	Unknown protein	FALSE
Solyc02g091620.3.1	3.18713	0.00719658	0.0485102	MUTL protein homolog 3 (AHRD V3.3 *-* AT4G35520.6)	FALSE
Solyc12g014010.2.1	3.18575	1.25476e-06	5.4394e-05	Glycosyltransferase (AHRD V3.3 *** Q94IF2_TOBAC)	TRUE
Solyc06g068270.3.1	3.1645	0.000881303	0.0100189	2-oxoglutarate (2OG) and Fe(II)-dependent oxygenase superfamily protein (AHRD V3.3 *** Q9XIA5_ARATH)	FALSE
Solyc11g018772.1.1	3.14486	2.55214e-07	1.42826e-05	Peroxidase (AHRD V3.3 *** M1CN26_SOLTU)	TRUE
Solyc01g108910.4.1	3.11197	1.18127e-08	1.1091e-06	maternal effect embryo arrest 14 (AHRD V3.3 *** AT2G15890.1)	TRUE
Solyc04g071770.3.1	3.10431	0.000202064	0.0032705	Ethylene-responsive transcription factor (AHRD V3.3 *** A0A1U8GDL3_CAPAN)	TRUE
Solyc06g072000.3.1	3.08299	0.000436801	0.00587472	P-loop containing nucleoside triphosphate hydrolases superfamily protein (AHRD V3.3 *** A0A2U1N2C4_ARTAN)	TRUE
Solyc04g077580.3.1	3.0708	0.00107528	0.0116444	BnaC03g48770D protein (AHRD V3.3 *** A0A078HIB5_BRANA)	FALSE
Solyc09g057760.4.1	3.0513	0.00661791	0.0456854	PDDEXK-like protein (AHRD V3.3 *-* A0A2U1LF29_ARTAN)	FALSE
Solyc01g096720.4.1	3.0114	3.49877e-05	0.000819316	Protein ZINC INDUCED FACILITATOR-LIKE 1 (AHRD V3.3 *** A0A1J3IH30_NOCCA)	TRUE
Solyc08g005330.2.1	2.96493	0.00482885	0.0363053	Histidinol-phosphate aminotransferase, chloroplastic (AHRD V3.3 *** A0A2G2XLG4_CAPBA)	FALSE
Solyc00g500241.1.1	2.96148	0.00478366	0.0360888	Cytochrome c biogenesis FC (AHRD V3.3 *-* A0A0C5B7H6_9SOLA)	TRUE
Solyc07g055415.1.1	2.94752	0.00655878	0.0454004	Lectin-domain receptor-like kinase (AHRD V3.3 *-* G4XXY5_NICAT)	TRUE
Solyc11g007600.2.1	2.90968	0.00540301	0.039367	Glucomannan 4-beta-mannosyltransferase 9 (AHRD V3.3 *** A0A1U8EU24_CAPAN)	FALSE
Solyc02g090120.1.1	2.89729	9.95193e-07	4.52196e-05	hypothetical protein (AHRD V3.3 -** AT5G66985.1)	TRUE
Solyc09g008830.3.1	2.82283	2.52481e-06	9.65618e-05	Sequence-specific DNA binding transcription factor (AHRD V3.3 *** A0A2U1LFW8_ARTAN)	TRUE
Solyc12g013700.2.1	2.80801	5.73202e-07	2.86038e-05	stem-specific protein TSJT1-like (AHRD V3.3 *** A0A2I4H4H1_9ROSI)	FALSE
Solyc05g050870.4.1	2.80746	0.00437991	0.0336711	Peroxidase (AHRD V3.3 *** K4C1C0_SOLLC)	TRUE
Solyc09g097990.1.1	2.797	0.00121724	0.0127456	Aldo/keto reductase (AHRD V3.3 *-* A0A2K3PHH9_TRIPR)	FALSE
Solyc05g017790.1.1	2.77085	0.00704209	0.0478596	Unknown protein	FALSE
Solyc06g074170.3.1	2.73375	1.50628e-07	9.18184e-06	NAC domain-containing protein 40 (AHRD V3.3 *** A0A2G2ZDN9_CAPAN)	TRUE
Solyc01g058660.1.1	2.71839	0.00325166	0.0269309	Unknown protein	FALSE
Solyc11g018774.1.1	2.70755	4.22061e-05	0.00095233	Peroxidase (AHRD V3.3 *** M1CN26_SOLTU)	TRUE
Solyc07g062490.1.1	2.70725	1.3571e-06	5.78183e-05	Epidermis-specific secreted glycoprotein EP1 (AHRD V3.3 *** A0A2G2WG47_CAPBA)	FALSE
Solyc10g086540.3.1	2.64023	0.000355024	0.00502064	ATP-dependent zinc metalloprotease FtsH (AHRD V3.3 *** A0A317MD73_9BACT)	TRUE
Solyc03g031890.3.1	2.60794	8.58387e-08	5.78419e-06	Cold induced protein-like (AHRD V3.3 *-* Q94JH8_ORYSJ)	TRUE
Solyc02g091730.3.1	2.60635	0.000706576	0.00847849	Chromatin SPT2 (AHRD V3.3 *** A0A2U1NKK8_ARTAN)	TRUE
Solyc08g082790.3.1	2.58265	3.6662e-05	0.00084752	Unknown protein	TRUE
Solyc04g039620.2.1	2.57938	0.000648201	0.00790733	Ribose-phosphate pyrophosphokinase (AHRD V3.3 *** A0A2U1NXC0_ARTAN)	TRUE
Solyc01g068380.3.1	2.55635	0.000165056	0.00280921	Purple acid phosphatase (AHRD V3.3 *** A0A2G2XQL8_CAPBA)	FALSE
Solyc07g017990.3.1	2.52924	0.000716492	0.00856117	DNA ligase (AHRD V3.3 *** V4LG43_EUTSA)	TRUE
Solyc12g009300.3.1	2.51473	9.19282e-08	6.11137e-06	fruit sucrose synthase	FALSE
Solyc06g071890.3.1	2.51281	0.00158421	0.0156689	Mitochondrial pyruvate carrier (AHRD V3.3 *** A0A2G2WMA1_CAPBA)	FALSE
Solyc12g088310.3.1	2.50302	0.0009651	0.0107113	Unknown protein	TRUE
Solyc06g076160.4.1	2.50006	0.00188073	0.0178406	Cytochrome P450 (AHRD V3.3 *** A0A200RCX6_9MAGN)	FALSE
Solyc10g084400.2.1	2.48864	8.36744e-09	8.33002e-07	Glutathione S-transferase (AHRD V3.3 *** Q76KW1_PEA)	FALSE
Solyc11g008680.2.1	2.47455	4.68634e-09	5.15784e-07	Acyl-[acyl-carrier-protein] desaturase (AHRD V3.3 *** A0A2G3B0E0_CAPCH)	FALSE
Solyc08g077370.4.1	2.47042	0.00472198	0.035741	Purine permease (AHRD V3.3 *** A0A2P5BSS2_TREOI)	TRUE
Solyc01g066820.4.1	2.46261	0.00280554	0.0240712	Kinesin-like protein (AHRD V3.3 *** A0A2G3CJ78_CAPCH)	TRUE
Solyc01g087990.3.1	2.4465	0.00409571	0.0321286	MADS-box transcription factor (AHRD V3.3 *** Q75V01_9ASPA)	TRUE
Solyc01g095080.3.1	2.44564	0.00189925	0.0179534	1-aminocyclopropane-1-carboxylic acid synthase-2	FALSE
Solyc06g008720.4.1	2.44186	0.00131937	0.0135483	Zinc finger, CW-type (AHRD V3.3 *-* A0A2U1Q0I4_ARTAN)	TRUE
Solyc11g073060.3.1	2.42755	0.000274723	0.00414196	Zinc finger, C2H2 (AHRD V3.3 *** A0A2U1KDM0_ARTAN)	TRUE
Solyc08g007470.2.1	2.42627	0.00269533	0.0233633	HAT transposon superfamily (AHRD V3.3 *** A0A2U1Q846_ARTAN)	TRUE
Solyc04g076220.3.1	2.41067	0.00152159	0.0151937	AT-hook motif nuclear-localized protein (AHRD V3.3 *** A0A1U8GD78_CAPAN)	TRUE
Solyc04g080540.2.1	2.40817	1.01512e-10	2.23449e-08	DNA polymerase epsilon catalytic subunit A (AHRD V3.3 *** AT1G19530.2)	TRUE
Solyc01g099620.3.1	2.39764	0.000199818	0.00325276	Respiratory burst oxidase-like protein (AHRD V3.3 *** C1IHQ9_9ROSI)	TRUE
Solyc01g067020.4.1	2.38816	0.000597887	0.00740759	Atypical receptor-like kinase 1 (AHRD V3.3 *** C5H8K0_SOLLC)	TRUE
Solyc04g071590.3.1	2.37833	0.000134508	0.00236655	Abscisic acid stress ripening 3	TRUE
Solyc04g011340.3.1	2.37252	0.000433923	0.00584395	WAT1-related protein (AHRD V3.3 *** K4BPI9_SOLLC)	FALSE
Solyc08g016070.3.1	2.34171	0.000764772	0.00896502	Guanine nucleotide exchange factor SPIKE 1 (AHRD V3.3 *-* A0A2G3AMT8_CAPAN)	TRUE
Solyc08g006350.3.1	2.33795	0.000915711	0.0103251	Glycosyltransferase (AHRD V3.3 *** B9VJL9_9SOLA)	FALSE
Solyc06g075775.1.1	2.32741	0.00451305	0.034454	Zinc finger protein ZAT12 (AHRD V3.3 *** A0A2G3CB25_CAPCH)	TRUE
Solyc08g083050.1.1	2.32473	1.27859e-05	0.000357267	Erythronate-4-phosphate dehydrogenase family protein (AHRD V3.3 -** AT1G19400.3)	FALSE
Solyc02g091985.1.1	2.30398	0.00300955	0.0254687	Unknown protein	FALSE
Solyc01g008670.4.1	2.297	0.00499516	0.0372084	Cytochrome (AHRD V3.3 *** A0A1U8F0H8_CAPAN)	FALSE
Solyc01g108100.3.1	2.2829	8.26362e-05	0.00161291	cold regulated protein 27 (AHRD V3.3 *** AT5G42900.2)	TRUE
Solyc11g011340.2.1	2.27166	8.15445e-06	0.000247773	cultivar Rio Grande ELI3	FALSE
Solyc10g008700.3.1	2.26514	0.00312343	0.026131	R2R3MYB transcription factor 49	TRUE
Solyc11g072140.3.1	2.25872	0.00142494	0.0144159	Protein kinase domain (AHRD V3.3 *** A0A200PR58_9MAGN)	FALSE
Solyc00g500243.1.1	2.25538	0.00403184	0.0317467	Cytochrome c oxidase subunit 2 (AHRD V3.3 *-* A0A0C5B2A3_HYONI)	TRUE
Solyc01g107100.3.1	2.25204	8.45215e-08	5.71487e-06	beta-1%2C4-xylosidase (AHRD V3.3 *** AT3G19615.1)	TRUE
Solyc09g007790.1.1	2.22562	9.90068e-05	0.00185215	Senescence regulator (AHRD V3.3 *** A0A2U1KXJ7_ARTAN)	TRUE
Solyc03g150153.1.1	2.2213	0.00467803	0.0355219	Unknown protein	FALSE
Solyc07g062480.2.1	2.21321	0.00250776	0.0222089	Epidermis-specific secreted glycoprotein EP1 (AHRD V3.3 *** A0A2G2Z4V8_CAPAN)	FALSE
Solyc11g018805.1.1	2.20696	0.000489946	0.00638154	Peroxidase (AHRD V3.3 *** M1CN26_SOLTU)	TRUE
Solyc08g078850.3.1	2.18604	3.46135e-05	0.000813437	lactate dehydrogenase	TRUE
Solyc04g051490.3.1	2.18467	0.000333208	0.00479737	Crossover junction endonuclease EME1B (AHRD V3.3 *** A0A2G2VFP4_CAPBA)	TRUE
Solyc09g075420.3.1	2.1828	3.93138e-07	2.08806e-05	ethylene response factor E.1	TRUE
Solyc03g114360.4.1	2.18197	2.98764e-09	3.50225e-07	Poly [ADP-ribose] polymerase (AHRD V3.3 *** A0A2I4EPD4_9ROSI)	TRUE
Solyc11g006730.1.1	2.1771	0.000737553	0.0087495	Germin (AHRD V3.3 *** A0A200QHW9_9MAGN)	FALSE
Solyc03g121900.1.1	2.17552	0.000225634	0.00355329	Bifunctional inhibitor/plant lipid transfer protein/seed storage helical domain containing protein (AHRD V3.3 *** A0A2P5DNS6_PARAD)	FALSE
Solyc01g107820.2.1	2.16898	4.47801e-06	0.000153484	TOMATO WOUND-INDUCED 1	FALSE
Solyc07g009230.3.1	2.15259	3.43037e-13	1.78839e-10	Defensin-like protein 1 (AHRD V3.3 *** A0A2G2ZS54_CAPAN)	FALSE
Solyc02g089510.3.1	2.13068	0.00668622	0.0460252	Unknown protein	FALSE
Solyc06g069150.1.1	2.12372	1.41461e-05	0.000389237	hypothetical protein (AHRD V3.3 *** AT1G13360.1)	TRUE
Solyc10g076510.2.1	2.1164	6.67078e-08	4.65334e-06	Pyruvate decarboxylase (AHRD V3.3 *** Q8H9C6_SOLTU)	TRUE
Solyc02g071970.1.1	2.11589	0.000430545	0.00581823	N66 matrix protein (AHRD V3.3 *** XP_004233072.1)	TRUE
Solyc07g006500.3.1	2.11275	8.95351e-05	0.00171545	trehalose-6-phosphate synthase 1	FALSE
Solyc11g018800.3.1	2.09541	0.00146057	0.0147104	Peroxidase (AHRD V3.3 *** K4D6T3_SOLLC)	TRUE
Solyc08g077630.3.1	2.09138	0.000218614	0.003462	Protein kinase superfamily protein (AHRD V3.3 *** A0A2U1KAY9_ARTAN)	TRUE
Solyc02g093420.4.1	2.08571	1.80579e-05	0.000478269	NAC domain-containing protein 10 (AHRD V3.3 *** A0A2G3ACK5_CAPAN)	TRUE
Solyc09g014910.4.1	2.08026	0.00436462	0.0336117	Protein LURP-one-related 15 (AHRD V3.3 *** A0A1U8E7M0_CAPAN)	FALSE
Solyc02g038740.4.1	2.07896	7.37969e-05	0.00147527	3-hydroxy-3-methylglutaryl coenzyme A reductase (AHRD V3.3 *** A0A2G2XB84_CAPBA)	TRUE
Solyc10g008400.1.1	2.07727	1.72916e-08	1.4971e-06	E3 ubiquitin-protein ligase RMA1H1 (AHRD V3.3 *** A0A2G3BCU0_CAPCH)	TRUE
Solyc05g006120.3.1	2.06114	0.000241241	0.00373961	DNA polymerase lambda-like protein (AHRD V3.3 *** A0A2K3P2F9_TRIPR)	TRUE
Solyc09g092640.3.1	2.05228	0.00241532	0.0215832	Cytochrome (AHRD V3.3 *** A0A1U8G4E5_CAPAN)	FALSE
Solyc11g017170.1.1	2.04846	0.00418871	0.0325805	Phospholipid-transporting ATPase (AHRD V3.3 *** A0A328CWN8_9ASTE)	TRUE
Solyc04g015940.3.1	2.0335	2.56363e-05	0.000637241	ARM repeat superfamily protein (AHRD V3.3 *** F4JNL5_ARATH)	TRUE
Solyc07g044970.1.1	2.01716	0.00244962	0.0217914	P-loop containing nucleoside triphosphate hydrolase (AHRD V3.3 *** A0A2U1P4X5_ARTAN),Pfam:PF13671	FALSE
Solyc12g013690.2.1	2.0096	7.43741e-10	1.09957e-07	Monooxygenase (AHRD V3.3 *** Q8H9C4_SOLTU)	FALSE
Solyc01g107090.2.1	2.00917	6.99701e-05	0.00142318	beta-1%2C4-xylosidase (AHRD V3.3 *** AT3G19615.1)	TRUE
Solyc08g062220.3.1	2.00898	4.43913e-05	0.000990356	Glycosyltransferase (AHRD V3.3 *** A0A218W5V3_PUNGR)	FALSE
Solyc07g065970.1.1	2.00724	7.18605e-05	0.00144825	Chaperone protein DnaJ (AHRD V3.3 *** A0A2G3C2H4_CAPCH)	FALSE
Solyc02g082635.1.1	1.99528	0.000395105	0.00545972	Unknown protein	FALSE
Solyc05g044555.1.1	1.99509	0.00568516	0.0408519	Retrovirus-related Pol polyprotein from transposon TNT 1-94 (AHRD V3.3 *-* A0A2K3MQ97_TRIPR)	FALSE
Solyc03g120260.4.1	1.99062	0.0059205	0.0421607	Coatomer subunit beta' (AHRD V3.3 *-* A0A1Q3BXD5_CEPFO)	FALSE
Solyc06g059740.4.1	1.99062	6.47937e-06	0.00020604	Alcohol dehydrogenase (AHRD V3.3 *** A0A2U1MN94_ARTAN)	FALSE
Solyc09g007830.3.1	1.98682	0.00253443	0.022385	Cytokinin riboside 5'-monophosphate phosphoribohydrolase (AHRD V3.3 *** A0A1U8E671_CAPAN)	FALSE
Solyc05g041200.4.1	1.98302	4.09812e-05	0.000927861	4-hydroxyphenylpyruvate dioxygenase (AHRD V3.3 *** A0A2G2WSP4_CAPBA)	TRUE
Solyc02g078380.3.1	1.97514	0.00040636	0.00557921	Stem-specific protein TSJT1 (AHRD V3.3 *** A0A1U8FVZ0_CAPAN)	TRUE
Solyc09g011620.2.1	1.97254	0.00160019	0.0157796	Glutathione S-transferase-like protein (AHRD V3.3 *** A8DUB0_SOLLC)	FALSE
Solyc02g083730.4.1	1.96392	7.33437e-09	7.58728e-07	Rhodanese-like domain (AHRD V3.3 *** A0A200RA82_9MAGN)	FALSE
Solyc09g011520.3.1	1.96259	1.47164e-05	0.000401578	Glutathione S-transferase-like protein (AHRD V3.3 *** A8DUB0_SOLLC)	FALSE
Solyc02g087070.4.1	1.95811	0.000118716	0.00213807	alpha-DOX1	TRUE
Solyc02g092290.4.1	1.95507	1.86745e-06	7.48909e-05	F-box/RNI-like superfamily protein (AHRD V3.3 *** F4KDV0_ARATH)	TRUE
Solyc00g500353.1.1	1.93508	0.00234229	0.0211492	Phenylalanine ammonia-lyase (AHRD V3.3 *** A0A2G2VZP0_CAPBA)	TRUE
Solyc03g113130.3.1	1.93388	0.000157366	0.00269453	plant cysteine oxidase 2-like (AHRD V3.3 *** A0A2G3A1M0_CAPAN)	TRUE
Solyc02g065240.3.1	1.9279	0.00114196	0.0121697	Methyl esterase 1 (AHRD V3.3 *** A0A2U1LMY0_ARTAN)	FALSE
Solyc12g042600.2.1	1.92733	9.82815e-05	0.0018438	Glycosyltransferase (AHRD V3.3 *** B1Q468_ANTMA)	TRUE
Solyc05g006870.3.1	1.91813	1.092e-06	4.87245e-05	Thioredoxin (AHRD V3.3 *** A0A2G2VLZ1_CAPBA)	FALSE
Solyc08g006470.4.1	1.88574	0.000468266	0.0061855	Zinc finger protein (AHRD V3.3 *** A0A2U1NTB4_ARTAN)	TRUE
Solyc07g055690.1.1	1.88328	1.05627e-05	0.000309554	Lectin-domain receptor-like kinase (AHRD V3.3 *** G4XXY5_NICAT)	FALSE
Solyc07g056280.3.1	1.8772	0.00238017	0.0213378	WRKY transcription factor 30	TRUE
Solyc06g076080.3.1	1.87472	0.00235996	0.0212225	Unknown protein	FALSE
Solyc04g009440.3.1	1.86643	1.83426e-05	0.000484513	NAC domain protein AY498713	TRUE
Solyc02g082450.3.1	1.86579	0.000293275	0.00435995	Auxin efflux carrier (AHRD V3.3 *** A0A200PYL2_9MAGN)	FALSE
Solyc06g007390.4.1	1.86568	6.95446e-08	4.8342e-06	LOB domain-containing protein 15 (AHRD V3.3 *** A0A2G2Z7B6_CAPAN)	TRUE
Solyc02g069740.4.1	1.85945	0.00641297	0.0446878	Transcription factor jumonji (Jmj) family protein / zinc finger (C5HC2 type) family protein (AHRD V3.3 *** A0A2U1QN90_ARTAN)	TRUE
Solyc10g008470.3.1	1.84547	0.000711845	0.00852621	ELMO/CED-12 family protein (AHRD V3.3 *** A0A1P8APM3_ARATH)	FALSE
Solyc08g068710.1.1	1.8237	0.00469363	0.0356266	Tyramine n-hydroxycinnamoyl transferase (AHRD V3.3 *** Q5D8C0_CAPAN)	TRUE
Solyc03g113120.4.1	1.81168	0.00169178	0.0164212	WRKY transcription factor 73	TRUE
Solyc09g098000.4.1	1.80829	2.4986e-06	9.61159e-05	NAD(P)-linked oxidoreductase, aldo/keto reductase family protein (AHRD V3.3 *** A0A1Y1HY98_KLENI)	TRUE
Solyc07g007840.3.1	1.79766	5.55458e-05	0.00119009	SPOC domain-containing protein (AHRD V3.3 *-* A0A1Q3D798_CEPFO)	TRUE
Solyc09g011560.3.1	1.79605	1.6456e-05	0.000445368	Glutathione S-transferase (AHRD V3.3 *** C0LF68_CAPAN)	FALSE
Solyc02g087210.3.1	1.79552	4.61758e-05	0.00102211	Zinc finger AN1 domain-containing stress-associated protein 12 (AHRD V3.3 *** A0A2G2XID2_CAPBA)	FALSE
Solyc06g063060.3.1	1.78579	0.000183792	0.00304951	Dormancy/auxin associated protein (AHRD V3.3 *-* A0A2K3JP12_TRIPR)	TRUE
Solyc01g086680.4.1	1.784	0.00429523	0.0332393	glutathione S-transferase T1	FALSE
Solyc09g074670.4.1	1.76529	0.00022119	0.00349441	Zinc finger, CW-type (AHRD V3.3 *-* A0A2U1Q0I4_ARTAN)	TRUE
Solyc02g067440.3.1	1.74703	0.00118185	0.012534	meloidogyne-induced giant cell protein DB114	TRUE
Solyc06g008620.1.1	1.74273	0.00506096	0.037499	TolB protein-related protein (AHRD V3.3 *** A0A2U1LVX5_ARTAN)	TRUE
Solyc07g007400.3.1	1.72914	0.0001367	0.00239449	Leucine-rich repeat-like protein (AHRD V3.3 *-* Q6K620_ORYSJ)	FALSE
Solyc03g117680.4.1	1.72507	4.65836e-07	2.4286e-05	ATP-dependent DNA helicase (AHRD V3.3 *** Q9ZUI1_ARATH)	TRUE
Solyc01g111880.4.1	1.72299	0.000939773	0.0105126	MAP kinase kinase kinase 11	FALSE
Solyc08g068730.1.1	1.70295	8.8512e-05	0.00169914	Tyramine n-hydroxycinnamoyl transferase (AHRD V3.3 *** Q5D8C0_CAPAN)	FALSE
Solyc02g081690.1.1	1.69747	1.9299e-07	1.12451e-05	Glycosyltransferase (AHRD V3.3 *** A0A2I4E012_9ROSI)	FALSE
Solyc00g094530.1.1	1.69227	0.00194176	0.0182725	NADH-ubiquinone oxidoreductase chain 1 (AHRD V3.3 *** A0A2G2XVU5_CAPAN)	FALSE
Solyc08g029000.3.1	1.66631	0.00181808	0.0174421	Lipoxygenase (AHRD V3.3 *** K4CJW3_SOLLC)	TRUE
Solyc07g056470.3.1	1.6552	2.60351e-06	9.91889e-05	Glutathione S-transferase-like protein (AHRD V3.3 *** A0A2K3N2T5_TRIPR)	FALSE
Solyc01g103310.4.1	1.65261	3.70247e-06	0.000130981	Zinc finger CCCH domain-containing protein (AHRD V3.3 *-* A0A2K3NPU7_TRIPR)	FALSE
Solyc08g078310.3.1	1.65055	7.65163e-05	0.00151435	Chromogranin (DUF1639) (AHRD V3.3 *-* O23587_ARATH)	TRUE
Solyc02g090610.1.1	1.64515	0.00443567	0.0340074	Unknown protein	TRUE
Solyc11g021060.2.1	1.63793	1.72985e-05	0.000463109	TOMARPIX proteinase inhibitor	FALSE
Solyc07g005230.2.1	1.63194	1.3155e-08	1.20099e-06	Unknown protein	FALSE
Solyc12g014220.3.1	1.62852	0.00355828	0.0287962	muscle M-line assembly protein (AHRD V3.3 *-* AT1G53800.3)	TRUE
Solyc02g071870.4.1	1.62692	8.70159e-05	0.00167653	Protein kinase domain (AHRD V3.3 *** A0A200QV78_9MAGN)	TRUE
Solyc12g096840.3.1	1.62442	0.000244124	0.00377569	N-acetyltransferase (AHRD V3.3 *** B6T916_MAIZE)	FALSE
Solyc10g084240.3.1	1.61516	7.76918e-05	0.00153182	Peroxidase (AHRD V3.3 *** K4D3L0_SOLLC)	FALSE
Solyc07g056190.3.1	1.61487	0.000912259	0.0103096	Heavy metal-associated isoprenylated plant protein (AHRD V3.3 *** A0A2R6QEC1_ACTCH)	FALSE
Solyc06g071580.3.1	1.60648	0.00668674	0.0460252	ATPase, histidine kinase, DNA gyrase B-, and HSP90-like domain containing protein, expressed (AHRD V3.3 *** Q33AG5_ORYSJ)	TRUE
Solyc07g005210.3.1	1.60075	0.000701994	0.00844396	Outer membrane lipoprotein blc-like (AHRD V3.3 *** A0A2K3KEW8_TRIPR)	TRUE
Solyc01g107080.3.1	1.59752	8.99505e-07	4.13459e-05	HXXXD-type acyl-transferase family protein (AHRD V3.3 *** A0A2K3MRI0_TRIPR)	FALSE
Solyc12g099740.2.1	1.59279	0.00410935	0.0322034	Regulator of chromosome condensation (RCC1) family with FYVE zinc finger domain-containing protein (AHRD V3.3 *** F4K149_ARATH)	TRUE
Solyc11g073265.1.1	1.58979	0.000783884	0.009151	Unknown protein	FALSE
Solyc07g055840.3.1	1.58966	0.00547886	0.0398026	Citrate synthase (AHRD V3.3 *** A0A2G2WEG9_CAPBA)	FALSE
Solyc12g045037.1.1	1.58066	0.00014232	0.00247324	Omega-6 fatty acid desaturase (AHRD V3.3 *** Q461Q1_HEVBR)	FALSE
Solyc03g080010.3.1	1.57994	0.00160845	0.0158218	DNA mismatch repair protein MutS (AHRD V3.3 *** A0A200R035_9MAGN)	TRUE
Solyc01g005470.3.1	1.57956	0.000119398	0.00214585	protein PLANT CADMIUM RESISTANCE 2-like (AHRD V3.3 *** A0A1U8ETE7_CAPAN)	FALSE
Solyc01g101050.3.1	1.5773	0.000326728	0.00472467	Peroxidase (AHRD V3.3 *** K4B1D5_SOLLC)	TRUE
Solyc02g093330.4.1	1.57369	0.000972178	0.0107657	nuclear pore complex protein NUP98A (AHRD V3.3 *-* A0A2I4ET44_9ROSI)	TRUE
Solyc03g117860.3.1	1.57331	0.00573613	0.0410989	RBR-type E3 ubiquitin transferase (AHRD V3.3 *** A0A2G3A2R7_CAPAN)	FALSE
Solyc10g086280.2.1	1.56771	0.000188394	0.00310763	heavy metal-associated isoprenylated plant protein 3-like (AHRD V3.3 *** A0A1S4A3L2_TOBAC)	TRUE
Solyc03g113370.3.1	1.56234	0.00340122	0.0279012	Ubiquitin carboxyl-terminal hydrolase-like protein (AHRD V3.3 *** A0A2K3NQ17_TRIPR)	TRUE
Solyc07g056500.4.1	1.55802	3.60136e-06	0.000128321	glutathione S-transferase T5	FALSE
Solyc03g114780.3.1	1.53736	0.000294353	0.00437012	RNA helicase DEAH-box9	TRUE
Solyc03g097610.3.1	1.52258	0.00335037	0.0275548	Bidirectional sugar transporter SWEET (AHRD V3.3 *** M1D4D6_SOLTU)	FALSE
Solyc09g065000.4.1	1.52019	0.000596161	0.00739545	Eukaryotic aspartyl protease family protein (AHRD V3.3 *** A0A2U1ML86_ARTAN)	FALSE
Solyc01g100460.3.1	1.51884	0.00121596	0.0127455	BZIP transcription factor (AHRD V3.3 *** C0LQL1_9CARY)	TRUE
Solyc03g013440.4.1	1.51367	0.000559587	0.00703124	Amino acid transporter (AHRD V3.3 *-* A0A200QES2_9MAGN)	FALSE
Solyc04g007160.1.1	1.51294	5.49155e-07	2.78243e-05	alpha-xylosidase 1-like (AHRD V3.3 *-* A0A2I4HUF9_9ROSI)	FALSE
Solyc10g081575.1.1	1.50227	7.1044e-05	0.00143911	Unknown protein	FALSE
Solyc07g054780.1.1	1.49996	0.00553742	0.0400811	Wound induced protein (AHRD V3.3 *** Q04129_SOLLC)	FALSE
Solyc11g006740.3.1	1.49988	0.00594752	0.0422923	F-box domain, Phloem protein 2-like protein (AHRD V3.3 *** A0A2U1NHQ2_ARTAN)	FALSE
Solyc01g050010.3.1	1.49557	0.00555571	0.0401548	Zinc finger BED domain-containing protein DAYSLEEPER (AHRD V3.3 *** A0A1J3I687_NOCCA)	FALSE
Solyc02g075620.4.1	1.49518	0.000695767	0.00838433	Pectinesterase (AHRD V3.3 *** A0A2G3D7Y1_CAPCH)	TRUE
Solyc01g081640.4.1	1.49332	0.00479467	0.0361306	DUF936 domain-containing protein (AHRD V3.3 *** A0A1Q3BMN1_CEPFO)	TRUE
Solyc03g121090.4.1	1.48663	0.00048597	0.00634226	BnaC02g12160D protein (AHRD V3.3 *-* A0A078HTB1_BRANA)	FALSE
Solyc01g100370.3.1	1.47913	0.0020684	0.0191571	Adenine nucleotide alpha hydrolases-like superfamily protein (AHRD V3.3 *** A0A2U1PDN0_ARTAN)	FALSE
Solyc06g072870.1.1	1.4788	7.9862e-05	0.00156803	Glycosyltransferase (AHRD V3.3 *** A0A2G3CA94_CAPCH)	TRUE
Solyc09g082870.3.1	1.47817	0.00307039	0.0258291	Calcium-transporting ATPase (AHRD V3.3 *** A0A2G2W115_CAPBA)	FALSE
Solyc05g009650.4.1	1.47736	0.000860697	0.00982782	Unknown protein	TRUE
Solyc09g011630.3.1	1.47661	8.83487e-05	0.00169765	Glutation-S-transferase	FALSE
Solyc07g055880.1.1	1.47145	0.00424075	0.0329206	vitellogenin-2 protein (AHRD V3.3 *-* AT1G31460.1)	FALSE
Solyc10g083880.2.1	1.4653	7.91714e-07	3.72557e-05	tonoplast intrinsic protein 1.3	FALSE
Solyc09g056430.4.1	1.46263	0.00437863	0.0336711	Serine/threonine-protein kinase OXI1 (AHRD V3.3 *** A0A2G2XS02_CAPBA)	TRUE
Solyc03g122340.3.1	1.46114	8.50382e-05	0.00164842	lipoxygenase D	TRUE
Solyc09g005870.1.1	1.45315	0.00529782	0.0388148	Cytochrome c-type biogenesis protein CcmE (AHRD V3.3 *** A0A1J3F0T2_NOCCA)	TRUE
Solyc12g006380.2.1	1.4528	0.000591423	0.00734588	2-oxoglutarate-dependent dioxygenase	TRUE
Solyc12g045035.1.1	1.44669	0.00109478	0.011813	Fatty acid desaturase (AHRD V3.3 *** A0A200QRI1_9MAGN)	FALSE
Solyc07g005890.3.1	1.44429	0.00657447	0.0454296	DEAD-box ATP-dependent RNA helicase 1 (AHRD V3.3 *** A0A2G2WAM1_CAPBA)	FALSE
Solyc03g111410.3.1	1.44207	0.00206347	0.0191293	B3 domain-containing protein (AHRD V3.3 *-* A0A1Q3B6Y6_CEPFO)	TRUE
Solyc04g077650.3.1	1.44128	8.7139e-06	0.000260772	Serine carboxypeptidase-like 17 (AHRD V3.3 *** A0A2G2ZRB2_CAPAN)	FALSE
Solyc12g013580.3.1	1.43951	0.00574069	0.0411167	Peptidyl-prolyl cis-trans isomerase CYP37, chloroplastic (AHRD V3.3 *** A0A1U8GBH5_CAPAN)	FALSE
Solyc10g047810.3.1	1.43894	0.00561522	0.0404373	Lectin receptor kinase (AHRD V3.3 *** Q6UY57_MEDTR)	TRUE
Solyc03g062930.3.1	1.41637	0.000136952	0.00239678	5'-3' exonuclease family protein (AHRD V3.3 *-* AT3G52050.2)	FALSE
Solyc01g100010.3.1	1.41501	0.000455248	0.00605703	F-box domain, Phloem protein 2-like protein (AHRD V3.3 *** A0A2U1MNC1_ARTAN)	FALSE
Solyc11g010440.3.1	1.41318	0.00215331	0.0198081	GLABRA2 expression modulator (AHRD V3.3 *** A0A2G3CDH1_CAPCH)	TRUE
Solyc03g119530.3.1	1.41126	0.00550081	0.0398889	LOB domain-containing protein 41 (AHRD V3.3 *** A0A2G2WPK9_CAPBA)	TRUE
Solyc07g054070.4.1	1.41083	0.000570883	0.007131	DTW domain-containing protein (AHRD V3.3 *** A0A2U1N2D0_ARTAN)	TRUE
Solyc06g071990.4.1	1.40682	1.46916e-11	4.09938e-09	P-loop containing nucleoside triphosphate hydrolases superfamily protein (AHRD V3.3 *-* A0A2U1N2C4_ARTAN)	TRUE
Solyc04g051600.4.1	1.40198	2.6661e-05	0.000659403	tRNA(His) guanylyltransferase 1 (AHRD V3.3 *** A0A1U8DYC8_CAPAN)	FALSE
Solyc05g014300.1.1	1.40101	0.00413504	0.032328	Unknown protein	FALSE
Solyc04g078450.4.1	1.39763	0.000117586	0.00212546	Unknown protein	TRUE
Solyc05g010000.1.1	1.395	0.00367954	0.0295841	Protein IDA (AHRD V3.3 *** A0A2G3B6Q4_CAPCH)	TRUE
Solyc06g016750.3.1	1.39144	6.08047e-07	3.01905e-05	Nuclear factor Y, subunit C10 (AHRD V3.3 *-* A0A1P8AN83_ARATH)	TRUE
Solyc12g056590.2.1	1.39138	0.00297261	0.0252315	Ethylene Response Factor D.2	TRUE
Solyc09g072880.3.1	1.3828	0.000756274	0.00889172	Protein FLUORESCENT IN BLUE LIGHT, chloroplastic (AHRD V3.3 *** A0A1U8GA42_CAPAN)	FALSE
Solyc06g066490.1.1	1.37949	0.00545637	0.0396985	Avr9/Cf-9 rapidly elicited protein 146 (AHRD V3.3 *** Q9FQZ6_TOBAC)	TRUE
Solyc09g011510.2.1	1.36099	0.00125911	0.0130734	Glutathione S-transferase-like protein (AHRD V3.3 *** A8DUB0_SOLLC)	FALSE
Solyc02g094000.1.1	1.3596	0.000907792	0.010265	EF_hand_5 domain-containing protein/EF_hand_6 domain-containing protein (AHRD V3.3 *** A0A1Q3B940_CEPFO)	FALSE
Solyc05g015470.1.1	1.35088	0.000109809	0.00201242	Chaperone protein dnaJ-like protein (AHRD V3.3 *** Q94CB5_ARATH)	TRUE
Solyc04g008030.2.1	1.33878	0.000102735	0.00190214	Cleavage and polyadenylation specificity factor subunit 3-II (AHRD V3.3 *** A0A2G3CFF4_CAPCH)	FALSE
Solyc03g097080.4.1	1.33613	0.00350495	0.0284763	Cystatin/monellin superfamily protein (AHRD V3.3 *** Q9CAM2_ARATH)	FALSE
Solyc05g021390.4.1	1.3319	0.00187366	0.01782	Cytochrome P450 (AHRD V3.3 *** A0A200R9G0_9MAGN)	FALSE
Solyc04g150161.1.1	1.3277	5.43735e-13	2.56475e-10	Unknown protein	TRUE
Solyc11g011750.1.1	1.3225	0.00159721	0.015766	Ethylene-responsive transcription factor 1B (AHRD V3.3 *** A0A2G2Y507_CAPAN)	TRUE
Solyc03g083240.4.1	1.31842	1.118e-05	0.000325239	Transcription factor jumonji (JmjC) domain-containing protein (AHRD V3.3 *** Q8VYB9_ARATH)	TRUE
Solyc01g107170.2.1	1.31634	2.85611e-05	0.000698548	Zinc finger protein (AHRD V3.3 *** A0T3Q5_SOLTU)	TRUE
Solyc07g055710.3.1	1.31357	0.0074152	0.0497363	Heat stress transcription factor A-5 (AHRD V3.3 *** A0A2G2Z4R4_CAPAN)	TRUE
Solyc09g092500.1.1	1.3076	1.52206e-06	6.30826e-05	UDP-glycosyltransferase 75C1 (AHRD V3.3 *** U75C1_SOLLC)	FALSE
Solyc01g005390.3.1	1.30496	1.41532e-06	5.99122e-05	Nudix hydrolase (AHRD V3.3 *** A0A2U1MBD3_ARTAN)	FALSE
Solyc07g006800.1.1	1.30075	0.000449851	0.00599731	Glycosyltransferase (AHRD V3.3 *** A0A0A1WDL3_NICAT)	FALSE
Solyc07g048070.3.1	1.29964	0.00636008	0.0444568	Cytochrome b561 and DOMON domain-containing protein (AHRD V3.3 *** A0A2G2WDB3_CAPBA)	TRUE
Solyc09g097960.3.1	1.29798	1.51316e-06	6.29771e-05	NAD(P)-linked oxidoreductase, aldo/keto reductase family protein (AHRD V3.3 *** A0A1Y1HY98_KLENI)	FALSE
Solyc06g066460.3.1	1.29498	0.00121658	0.0127455	Nuclear poly(A) polymerase 4 (AHRD V3.3 *-* A0A2G2ZBI7_CAPAN)	TRUE
Solyc11g068690.2.1	1.29205	7.40617e-07	3.52701e-05	Plant intracellular ras-group-related lrr protein 4 (AHRD V3.3 *-* A0A314KZJ1_NICAT)	TRUE
Solyc07g065600.3.1	1.29131	0.00684218	0.0468384	Inner centromere protein, ARK-binding region protein (AHRD V3.3 *-* A0A1P8BE82_ARATH)	TRUE
Solyc03g083480.4.1	1.29076	9.8681e-05	0.0018478	LEAF RUST 10 DISEASE-RESISTANCE LOCUS RECEPTOR-LIKE PROTEIN KINASE-like 2.1 (AHRD V3.3 *** A0A1U8FAX0_CAPAN)	FALSE
Solyc09g091130.4.1	1.2897	0.0025515	0.0224657	Glutathione S-transferase (AHRD V3.3 *** A0A200PVL1_9MAGN)	FALSE
Solyc05g055460.1.1	1.2863	3.09636e-07	1.69923e-05	Unknown protein	TRUE
Solyc01g091360.4.1	1.28579	0.00198183	0.0185286	DUF1499 family protein (AHRD V3.3 *** AT3G60810.1)	TRUE
Solyc02g086590.3.1	1.28462	6.31176e-05	0.00131485	Cysteine-rich receptor-like protein kinase 42 (AHRD V3.3 *** A0A2G2XIU5_CAPBA)	TRUE
Solyc10g012060.3.1	1.28443	0.000441378	0.00591651	Mechanosensitive ion channel protein 1, mitochondrial (AHRD V3.3 *** A0A2G3BDL8_CAPCH)	TRUE
Solyc06g083890.4.1	1.28088	0.0018548	0.0176746	Pre-mRNA-splicing factor SLU7 (AHRD V3.3 *** A0A2G2WMV0_CAPBA)	TRUE
Solyc10g084220.3.1	1.27987	0.000554621	0.0070074	Protein FAR1-RELATED SEQUENCE 7 (AHRD V3.3 *** A0A2G2VTX9_CAPBA)	TRUE
Solyc07g007330.1.1	1.27985	2.90583e-08	2.35932e-06	Serine-rich protein (AHRD V3.3 *** E5GCC5_CUCME)	TRUE
Solyc05g015720.2.1	1.27984	0.00690972	0.0471704	MADS-box transcription factor (AHRD V3.3 *** F1T119_9ERIC)	TRUE
Solyc02g086600.3.1	1.27969	7.11233e-05	0.00143925	Polyribonucleotide nucleotidyltransferase (AHRD V3.3 *** A0A2U1PID0_ARTAN)	TRUE
Solyc06g053590.4.1	1.27668	5.40401e-05	0.00116368	Nuclear-pore anchor protein (AHRD V3.3 *-* A0A142CD35_9LAMI)	TRUE
Solyc02g071560.4.1	1.27264	4.67286e-07	2.42977e-05	Subtilisin-like protease (AHRD V3.3 *** A0A2I0VHD6_9ASPA)	TRUE
Solyc02g079240.1.1	1.27225	0.000213453	0.00340203	Unknown protein	TRUE
Solyc06g009680.4.1	1.27104	1.60103e-09	2.05961e-07	BRCT domain-containing protein (AHRD V3.3 *** A0A1U8F8H4_CAPAN)	TRUE
Solyc07g063410.3.1	1.27072	0.00394818	0.0312744	NAC domain protein (AHRD V3.3 *** S5RDS7_9ROSA)	TRUE
Solyc01g007010.2.1	1.26405	0.00145064	0.0146253	RING-type E3 ubiquitin transferase (AHRD V3.3 *** Q3HLY8_CAPAN)	FALSE
Solyc08g079480.3.1	1.26057	0.000318703	0.0046391	Ankyrin repeat/KH domain protein (DUF1442) (AHRD V3.3 *** O22136_ARATH)	FALSE
Solyc08g006010.3.1	1.2524	0.00253384	0.022385	WD-40 repeat containing protein (AHRD V3.3 *** A0A0K0XR07_TOBAC)	TRUE
Solyc05g013690.4.1	1.25095	1.29786e-06	5.5774e-05	GDSL esterase/lipase (AHRD V3.3 *** A0A2R6REU1_ACTCH)	FALSE
Solyc10g080610.1.1	1.2474	2.71825e-05	0.00066896	F-box/kelch-repeat protein At1g15670-like (AHRD V3.3 *** A0A2I4E0A4_9ROSI)	FALSE
Solyc05g051900.3.1	1.24714	0.000552634	0.00700014	Major facilitator superfamily (AHRD V3.3 *** A0A200QUR2_9MAGN)	TRUE
Solyc03g005450.3.1	1.24588	2.10929e-05	0.000540585	Cellulose synthase (AHRD V3.3 *** A0A200Q4F9_9MAGN)	TRUE
Solyc03g115920.3.1	1.24549	5.16437e-08	3.73399e-06	RBR-type E3 ubiquitin transferase (AHRD V3.3 *** A0A1U8GHK6_CAPAN)	FALSE
Solyc08g059710.4.1	1.24505	1.97125e-05	0.000514279	EEIG1/EHBP1 N-terminal domain-containing protein (AHRD V3.3 *** A0A2U1Q5Z2_ARTAN)	TRUE
Solyc09g065340.3.1	1.24418	0.000449662	0.00599731	Acyl-CoA N-acyltransferase with RING/FYVE/PHD-type zinc finger protein (AHRD V3.3 *-* A0A2U1KTB4_ARTAN)	TRUE
Solyc12g019710.1.1	1.23452	0.00447687	0.0342835	Unknown protein	FALSE
Solyc01g098150.3.1	1.23001	0.00742115	0.0497363	Pentatricopeptide repeat-containing protein (AHRD V3.3 *** A0A2G2YZ45_CAPAN)	FALSE
Solyc01g087980.4.1	1.22966	0.000561036	0.00704353	DUF793 domain-containing protein (AHRD V3.3 *** A0A1Q3CNG5_CEPFO)	FALSE
Solyc04g016230.4.1	1.22856	0.00251299	0.0222452	Glycosyltransferase (AHRD V3.3 *** A0A0A1WCD6_NICAT)	FALSE
Solyc03g033740.4.1	1.2272	0.001002	0.0110159	proteasome subunit beta type-1 (AHRD V3.3 --* NP_001314110.1)	FALSE
Solyc04g081580.4.1	1.22505	2.04103e-11	5.53902e-09	RNA helicase DEAD15	TRUE
Solyc02g089340.4.1	1.21787	0.00157284	0.0155875	DNA-directed RNA polymerase (AHRD V3.3 *** A0A2G3ABW1_CAPAN)	TRUE
Solyc04g078340.3.1	1.21218	1.12019e-05	0.000325396	Cytochrome P450 (AHRD V3.3 *-* A0A200QZM5_9MAGN)	FALSE
Solyc01g006180.4.1	1.20819	0.000804383	0.00932454	P-loop containing nucleoside triphosphate hydrolases superfamily protein (AHRD V3.3 *** A0A2U1MH74_ARTAN)	TRUE
Solyc05g046130.4.1	1.20818	2.1066e-05	0.000540585	DUF1218 domain-containing protein (AHRD V3.3 *** A0A1Q3CI94_CEPFO)	FALSE
Solyc08g005300.3.1	1.2074	0.00526207	0.0385671	DnaJ domain (AHRD V3.3 *-* A0A200PXA9_9MAGN)	TRUE
Solyc01g094830.4.1	1.20421	0.000717008	0.00856204	G-type lectin S-receptor-like serine/threonine-protein kinase SD2-2 (AHRD V3.3 *** A0A2G3BSY6_CAPCH)	TRUE
Solyc04g063360.3.1	1.20303	3.34999e-05	0.000792911	ATP-dependent zinc metalloprotease FtsH (AHRD V3.3 *** A0A1J3JD08_NOCCA)	TRUE
Solyc07g005680.4.1	1.19914	6.77605e-05	0.00138965	Carboxypeptidase (AHRD V3.3 *** A0A2G3BXD7_CAPCH)	FALSE
Solyc02g070020.1.1	1.19302	0.000216991	0.00343905	UDP-Glycosyltransferase superfamily protein (AHRD V3.3 *** A0A2U1N3R1_ARTAN)	FALSE
Solyc10g085580.3.1	1.19266	2.74202e-06	0.000102688	Embryo sac development arrest 7 (AHRD V3.3 *** A0A2U1PPL1_ARTAN)	TRUE
Solyc01g091800.3.1	1.18944	0.00296996	0.0252199	Ribosomal RNA small subunit methyltransferase A (AHRD V3.3 *** F4FS23_LACBN)	TRUE
Solyc04g082860.3.1	1.18647	0.0029903	0.0253491	Glycosyltransferase (AHRD V3.3 *** A0A2I4FMV0_9ROSI)	FALSE
Solyc04g009360.3.1	1.18558	5.68736e-05	0.00120681	Transducin/WD40 repeat-like superfamily protein (AHRD V3.3 *** A0A2U1KCL2_ARTAN)	TRUE
Solyc05g009720.3.1	1.18239	0.000567553	0.00709594	Myb-like transcription factor family protein (AHRD V3.3 *** A0A1P8AW12_ARATH)	TRUE
Solyc06g068450.3.1	1.18046	7.38251e-07	3.52701e-05	Non-specific serine/threonine protein kinase (AHRD V3.3 *** A0A2G2WLA4_CAPBA)	TRUE
Solyc10g086090.2.1	1.17383	1.68578e-07	1.01511e-05	Ethylene-responsive proteinase inhibitor 1 (AHRD V3.3 *** A0A2G2VU06_CAPBA)	FALSE
Solyc11g006210.3.1	1.1738	0.00472313	0.035741	Unknown protein	FALSE
Solyc01g060040.3.1	1.17293	0.000296888	0.00440023	WD40 domain-containing protein/Bromodomain domain-containing protein (AHRD V3.3 *** A0A1Q3BSD0_CEPFO)	TRUE
Solyc03g119940.3.1	1.17223	0.00339143	0.0278325	trichohyalin (AHRD V3.3 *** AT3G15550.1)	TRUE
Solyc09g072680.2.1	1.17184	0.00254376	0.0224274	F-box domain (AHRD V3.3 *** A0A200Q000_9MAGN)	TRUE
Solyc08g068700.1.1	1.16816	0.000210821	0.00336304	Tyramine n-hydroxycinnamoyl transferase (AHRD V3.3 *** Q5D8C0_CAPAN)	TRUE
Solyc06g005310.3.1	1.16762	5.85834e-10	9.35965e-08	Transcription factor MYB48 (AHRD V3.3 *** A0A2G2Z7N5_CAPAN)	TRUE
Solyc06g068210.3.1	1.16534	0.000812412	0.00940391	Protein FAR1-RELATED SEQUENCE 8 (AHRD V3.3 *** A0A2G3C918_CAPCH)	TRUE
Solyc10g076210.2.1	1.16382	0.00054778	0.00696092	Peroxidase (AHRD V3.3 *** K4D1W3_SOLLC)	TRUE
Solyc03g097670.4.1	1.1581	2.15127e-10	4.30492e-08	DNA binding,ATP binding protein (AHRD V3.3 *** A0A2U1MGM2_ARTAN)	TRUE
Solyc08g074570.1.1	1.15533	8.70805e-05	0.00167653	G-patch domain (AHRD V3.3 *-* A0A200RB68_9MAGN)	TRUE
Solyc02g078250.4.1	1.15332	0.000121667	0.00217738	CASP-like protein (AHRD V3.3 *** A0A218WXP0_PUNGR)	FALSE
Solyc05g006130.4.1	1.14856	0.000206676	0.00331891	RNA helicase DEAD17	TRUE
Solyc06g009290.4.1	1.14796	7.57737e-05	0.00150266	ABC transporter B family member (AHRD V3.3 *** A0A2K3NLX3_TRIPR)	TRUE
Solyc08g045850.3.1	1.1468	2.1383e-06	8.40514e-05	Pentatricopeptide repeat (AHRD V3.3 *** A0A200RA18_9MAGN)	TRUE
Solyc02g062120.3.1	1.14239	0.00169779	0.0164681	Membrane fusion protein Use1 (AHRD V3.3 *-* A0A1P8AP56_ARATH)	FALSE
Solyc04g078460.3.1	1.14113	3.79653e-05	0.00086751	Isoaspartyl peptidase/L-asparaginase (AHRD V3.3 *** A0A1U8GBV5_CAPAN)	TRUE
Solyc01g096010.4.1	1.13923	0.0037334	0.0299564	Embryo defective 1703 (AHRD V3.3 *** Q9M360_ARATH)	TRUE
Solyc08g068570.4.1	1.13171	0.00569226	0.0408732	Tocopherol cyclase (AHRD V3.3 *** Q6E6T1_SOLTU)	TRUE
Solyc07g063930.4.1	1.12888	0.000149672	0.00257391	Organic cation/carnitine transporter 4 (AHRD V3.3 *-* A0A2G2WG88_CAPBA)	FALSE
Solyc02g089300.3.1	1.12634	0.00159673	0.015766	Unknown protein	TRUE
Solyc07g053440.4.1	1.12557	0.00327786	0.0270799	hypothetical protein (AHRD V3.3 *-* AT3G58110.2)	TRUE
Solyc10g079930.1.1	1.12147	6.86667e-06	0.000216273	Glycosyltransferase (AHRD V3.3 *** A0A0A1WDH9_NICAT)	FALSE
Solyc04g077860.4.1	1.12131	0.00104632	0.0113973	Sigma-B regulation protein RsbQ (AHRD V3.3 *** A0A2T0KZ78_9BURK)	FALSE
Solyc12g044930.3.1	1.12049	0.00168265	0.0163728	F-box protein (AHRD V3.3 *** A0A2G3B4N2_CAPCH)	FALSE
Solyc04g051660.3.1	1.11636	0.00374007	0.0299978	protein SLOW GREEN 1, chloroplastic (AHRD V3.3 *** A0A2I4G7E6_9ROSI)	FALSE
Solyc01g079260.4.1	1.11556	1.188e-07	7.61665e-06	WRKY transcription factor 23	TRUE
Solyc03g119270.1.1	1.11159	0.00116816	0.0124221	AP-3 complex subunit delta (AHRD V3.3 *** A0A1U8FWE5_CAPAN)	TRUE
Solyc10g081570.3.1	1.11126	0.000139737	0.00243905	Marmande	TRUE
Solyc03g113340.3.1	1.11015	0.00152819	0.0152519	Nodulin-like / Major Facilitator Superfamily protein (AHRD V3.3 *** A0A2U1M3G7_ARTAN)	FALSE
Solyc01g096730.2.1	1.10983	6.09837e-05	0.00127442	protein ZINC INDUCED FACILITATOR-LIKE 1-like (AHRD V3.3 *** A0A2I4H204_9ROSI)	FALSE
Solyc10g006000.4.1	1.10762	0.00410293	0.0321659	DEK (AHRD V3.3 *-* A0A200RBP9_9MAGN)	TRUE
Solyc03g082550.3.1	1.10759	0.000718761	0.00857277	Homeobox-leucine zipper protein HOX6 (AHRD V3.3 *** A0A2G3A038_CAPAN)	TRUE
Solyc06g075780.3.1	1.1069	0.000176835	0.00296385	Zinc finger protein (AHRD V3.3 *** A0A200PZ96_9MAGN)	TRUE
Solyc07g056480.3.1	1.10317	7.29488e-05	0.00146571	glutathione S-transferase/peroxidase	FALSE
Solyc04g076845.1.1	1.10177	0.00021918	0.00346818	Basic helix-loop-helix (BHLH) DNA-binding superfamily protein (AHRD V3.3 *-* A0A2U1PS36_ARTAN)	TRUE
Solyc01g057910.3.1	1.10147	0.00504083	0.0374049	R2R3MYB transcription factor 2	TRUE
Solyc01g087090.3.1	1.10081	7.6412e-05	0.0015138	Unknown protein	FALSE
Solyc06g073830.1.1	1.09902	3.15956e-05	0.000757735	Calcium-binding protein CML38 (AHRD V3.3 *** A0A2G3BAP9_CAPCH)	FALSE
Solyc12g009880.1.1	1.0972	0.00212838	0.0196301	Serine-rich protein (AHRD V3.3 *** E5GCC5_CUCME)	TRUE
Solyc07g064520.3.1	1.09556	0.000107775	0.00198065	RNA helicase DEAD24	TRUE
Solyc07g042510.3.1	1.0925	0.000481433	0.00631216	Bax inhibitor 1-related (AHRD V3.3 *** A0A200RBK8_9MAGN)	FALSE
Solyc01g105070.3.1	1.08977	0.00740422	0.0497069	LECEVI16G peroxidase precursor	TRUE
Solyc11g030600.3.1	1.08866	0.000166996	0.0028398	cytosine-5 DNA methyltransferase	TRUE
Solyc01g091520.3.1	1.08803	0.000477142	0.00626779	Enoyl-CoA delta isomerase 1, peroxisomal (AHRD V3.3 *** A0A2G3DDW4_CAPCH)	FALSE
Solyc12g005850.2.1	1.08651	0.000101487	0.00188432	Protein DETOXIFICATION (AHRD V3.3 *** A0A1J7GU23_LUPAN)	FALSE
Solyc10g076220.3.1	1.08181	0.000276573	0.00416351	Peroxidase (AHRD V3.3 *** K4D1W4_SOLLC)	TRUE
Solyc12g056090.2.1	1.08014	8.51212e-05	0.00164842	Cox19-like CHCH family protein (AHRD V3.3 *-* F4JPC0_ARATH)	TRUE
Solyc12g055910.3.1	1.08002	1.25064e-05	0.000351634	RING/U-box protein (AHRD V3.3 *** A0A1P8B7Y2_ARATH)	TRUE
Solyc12g044820.3.1	1.07881	1.20826e-08	1.12379e-06	ABC transporter C family member 8 (AHRD V3.3 *** A0A2G2W0I8_CAPBA)	FALSE
Solyc08g075540.5.1	1.0773	5.28667e-05	0.00114214	#N/A	#N/A
Solyc09g074850.4.1	1.07577	0.000719327	0.00857436	Glutathione S-transferase (AHRD V3.3 *** A0A2G3CTS1_CAPCH)	FALSE
Solyc06g076800.3.1	1.07471	0.00515075	0.0380043	Cytochrome P450 (AHRD V3.3 *** A0A200R4M3_9MAGN)	FALSE
Solyc06g017970.4.1	1.0737	1.11152e-05	0.000323828	TRAF-like family protein (AHRD V3.3 *** A0A2U1LVB2_ARTAN)	TRUE
Solyc03g078710.3.1	1.07257	0.000128571	0.00227625	Glycosyltransferase (AHRD V3.3 *-* A0A328E199_9ASTE)	FALSE
Solyc06g076280.3.1	1.06801	0.000366207	0.00514438	Transcription factor GRAS (AHRD V3.3 *** A0A2U1MZS4_ARTAN)	TRUE
Solyc08g082010.3.1	1.06397	1.22081e-07	7.78688e-06	Myosin heavy chain-related protein (AHRD V3.3 *-* A0A2U1NUP5_ARTAN)	TRUE
Solyc04g005610.3.1	1.05858	0.0014057	0.0142666	NAC domain-containing protein 2 (AHRD V3.3 *** NAP2_SOLLC)	TRUE
Solyc04g054260.4.1	1.05718	0.000172397	0.00290361	Cytochrome p450 (AHRD V3.3 *** A0A2K3NDQ9_TRIPR)	FALSE
Solyc10g084960.2.1	1.05544	0.00434258	0.0335142	Glutathione S-transferase (AHRD V3.3 *** C0LF68_CAPAN)	FALSE
Solyc06g005070.3.1	1.0535	0.00120891	0.0126987	Major facilitator superfamily protein (AHRD V3.3 *** A0A1P8AQH5_ARATH)	TRUE
Solyc06g066520.1.1	1.0529	0.00272251	0.0235195	Avr9/Cf-9 rapidly elicited protein 146 (AHRD V3.3 *** Q9FQZ6_TOBAC)	TRUE
Solyc04g025650.3.1	1.05025	0.00189418	0.0179377	FAD/NAD(P)-binding oxidoreductase family protein (AHRD V3.3 *** A0A2U1LBG7_ARTAN)	FALSE
Solyc11g044340.3.1	1.04992	0.00029295	0.00435995	Pre-mRNA-processing protein 40A (AHRD V3.3 *** A0A2U1LAQ9_ARTAN)	TRUE
Solyc03g123860.4.1	1.04819	0.00539447	0.0393193	Receptor-like protein kinase INRPK1c	FALSE
Solyc10g007280.4.1	1.0464	0.000146609	0.00253223	P-loop containing nucleoside triphosphate hydrolases superfamily protein (AHRD V3.3 *** A0A2U1NGY3_ARTAN)	TRUE
Solyc03g058350.4.1	1.04209	1.82899e-07	1.07638e-05	Eukaryotic translation initiation factor 5B (AHRD V3.3 *** A0A2G2WJG0_CAPBA)	TRUE
Solyc07g065340.1.1	1.03678	0.00109807	0.0118356	Serine acetyltransferase (AHRD V3.3 *** A0A2K3M2Y7_TRIPR)	TRUE
Solyc02g063450.4.1	1.03667	2.08002e-06	8.24145e-05	Glycine-rich domain-containing protein 2 (AHRD V3.3 *** A0A2G3A574_CAPAN)	TRUE
Solyc01g006050.2.1	1.03593	0.00600515	0.0425038	transmembrane protein 45B-like (AHRD V3.3 *** A0A2I4DQK0_9ROSI)	FALSE
Solyc02g089600.3.1	1.03441	8.04349e-07	3.77606e-05	Ribosomal RNA-processing protein 7 (AHRD V3.3 *-* A0A200QPW1_9MAGN)	TRUE
Solyc12g010430.1.1	1.03101	0.000352244	0.00499521	hypothetical protein (AHRD V3.3 --* AT5G35090.1)	TRUE
Solyc06g072330.3.1	1.03028	0.00310036	0.0259709	Mitochondrial import inner membrane translocase subunit TIM14 (AHRD V3.3 *** B6T323_MAIZE)	FALSE
Solyc12g097060.1.1	1.02826	0.000458987	0.0060945	golgin subfamily A member 6-like protein 2 (AHRD V3.3 *** A0A2I4DJB1_9ROSI)	TRUE
Solyc06g069230.3.1	1.02591	0.00392551	0.0311322	DNA mismatch repair protein MutS (AHRD V3.3 *** A0A200Q8J6_9MAGN)	TRUE
Solyc01g005800.3.1	1.02587	0.00598405	0.0424518	Calmodulin binding protein (AHRD V3.3 *** A0A2K3N563_TRIPR)	TRUE
Solyc05g008310.4.1	1.02328	0.00324325	0.0268837	S receptor kinase (AHRD V3.3 *** A4UWL9_BRANA)	TRUE
Solyc01g090260.5.1	1.02318	0.00275462	0.0237268	#N/A	#N/A
Solyc05g047520.4.1	1.02296	2.67172e-06	0.000101204	Helicase (AHRD V3.3 *** A0A200R9A6_9MAGN)	TRUE
Solyc09g092210.4.1	1.01967	0.00162558	0.0159586	Protein BOBBER 1 (AHRD V3.3 *-* A0A2G2W249_CAPBA)	TRUE
Solyc03g112060.3.1	1.01919	0.000476049	0.00625813	Quinolinate synthase, chloroplastic (AHRD V3.3 *** A0A2G3CY80_CAPCH)	FALSE
Solyc05g039990.4.1	1.01911	0.00631654	0.0442207	Unknown protein	FALSE
Solyc03g007490.3.1	1.01812	0.00368678	0.0296303	Cytochrome c oxidase assembly protein COX16 (AHRD V3.3 *-* A0A2U1MEP7_ARTAN)	TRUE
Solyc08g077140.1.1	1.01687	0.00338123	0.0277602	Pentatricopeptide repeat-containing protein, chloroplastic (AHRD V3.3 *-* A0A2G3AFE9_CAPAN)	FALSE
Solyc02g076830.1.1	1.01516	0.000344597	0.00491491	Cell attachment protein in somatic embryogenesis (AHRD V3.3 *** Q6I6Y6_DAUCA)	FALSE
Solyc10g085880.1.1	1.01457	1.7767e-05	0.000472458	UDP-glycosyltransferase 73C4 (AHRD V3.3 *** U73C4_SOLLC)	TRUE
Solyc11g013810.3.1	1.01334	1.49589e-05	0.000407635	Nitrate reductase (AHRD V3.3 *** Q8LT13_SOLTU)	TRUE
Solyc02g067670.4.1	1.01253	5.7996e-05	0.00122231	DNA repair protein UVH3 (AHRD V3.3 *** A0A2G2XCM0_CAPBA)	TRUE
Solyc11g071350.1.1	1.01244	0.000687232	0.00831181	Aluminum-activated malate transporter (AHRD V3.3 *** A0A200Q9N0_9MAGN)	FALSE
Solyc02g084240.3.1	1.01068	3.60595e-07	1.94123e-05	H1 histone-like protein	TRUE
Solyc08g082640.2.1	1.01046	0.00017903	0.00298822	Cellulose synthase (AHRD V3.3 *** A0A200QCL6_9MAGN)	FALSE
Solyc12g094710.2.1	1.00957	0.00120325	0.0126594	AT-hook motif nuclear-localized protein 10 (AHRD V3.3 *-* A0A2G3B4F7_CAPCH)	TRUE
Solyc01g097640.3.1	1.00699	8.30311e-05	0.00161902	Ribosome biogenesis protein BMS1-like protein (AHRD V3.3 *** A0A2G2YYU1_CAPAN)	TRUE
Solyc02g091090.4.1	1.00626	0.00110341	0.0118738	Valyl-tRNA synthetase (AHRD V3.3 *-* A0A2I0WPG5_9ASPA)	TRUE
Solyc02g090460.2.1	1.0041	0.00347826	0.0283132	Unknown protein	TRUE
Solyc06g081980.1.1	1.00361	5.03995e-07	2.59341e-05	Pyridoxal 5'-phosphate synthase pdxS subunit (AHRD V3.3 *** U9T0K3_RHIID)	FALSE
Solyc04g080600.3.1	1.00352	2.73861e-06	0.000102688	Auxilin-like protein 1 (AHRD V3.3 *** A0A2G2V5U3_CAPBA)	TRUE
Solyc03g058930.4.1	1.00198	0.00199185	0.0185872	Hypersensitive-induced response protein (AHRD V3.3 *-* A6YGE4_CARPA)	FALSE
Solyc03g059420.4.1	1.00038	2.64855e-05	0.000655881	Sister chromatid cohesion protein (AHRD V3.3 *** A0A2G2ZNX8_CAPAN)	TRUE

## Sheet: DOWN
Supplemental Table S3. Down-regulated DEGs of E3 vs W3 in root (log2 fold change ≦ -1.0, p_value < 0.05, p_adj < 0.05).
Geneid	log2FoldChange	p_value	p_adj	Annotation
Solyc01g090150.1.1	-4.69905	0.000169389	0.00286328	Unknown protein
Solyc01g095450.4.1	-4.32465	0.000606784	0.00748971	GDSL esterase/lipase (AHRD V3.3 *** A0A2G2W6L9_CAPBA)
Solyc02g070110.1.1	-4.1515	0.00182129	0.0174645	FAD-binding Berberine family protein (AHRD V3.3 *** A0A2U1LDC6_ARTAN)
Solyc01g017600.3.1	-3.80384	0.0026959	0.0233633	transmembrane protein 45B-like (AHRD V3.3 *** A0A2I4DQK0_9ROSI)
Solyc11g043130.2.1	-3.79996	0.000761879	0.0089417	Phosphatidylinositol 4-kinase alpha 1 (AHRD V3.3 *** A0A2G2VJB2_CAPBA)
Solyc09g082250.3.1	-3.36446	0.00174608	0.0168616	N-acetyltransferase (AHRD V3.3 *** A0A2N9Z4V7_PAEPO)
Solyc01g108210.4.1	-2.94611	0.00379362	0.0303291	Cytochrome P450 (AHRD V3.3 *** A0A200QZB6_9MAGN)
Solyc12g088860.2.1	-2.79271	8.87989e-08	5.96337e-06	EF-hand domain (AHRD V3.3 *** A0A200QZ93_9MAGN)
Solyc08g080190.4.1	-2.74007	0.00390753	0.0310518	Glucose-methanol-choline (GMC) oxidoreductase family protein (AHRD V3.3 *** A0A2U1QFE7_ARTAN)
Solyc06g082820.4.1	-2.64733	0.00386635	0.0307492	MLO-like protein (AHRD V3.3 *** K4CAD7_SOLLC)
Solyc10g074826.1.1	-2.61461	1.27552e-16	4.21157e-13	Unknown protein
Solyc09g091340.1.1	-2.5464	0.000173055	0.00290787	Plant self-incompatibility S1 (AHRD V3.3 *** A0A118JZS1_CYNCS)
Solyc09g009480.1.1	-2.5312	0.00296177	0.0251611	F-box protein (AHRD V3.3 *** A0A2K3LAB0_TRIPR)
Solyc06g072350.3.1	-2.53059	2.06718e-07	1.18361e-05	CASP-like protein (AHRD V3.3 *** A0A2G3CXI9_CAPCH)
Solyc07g061800.4.1	-2.42399	0.00399172	0.0315185	Heme-binding-like protein (AHRD V3.3 *** A0A2I0X1C8_9ASPA)
Solyc01g097700.1.1	-2.40371	0.000320249	0.00465818	Extensin-like protein Dif10 (AHRD V3.3 *-* Q43504_SOLLC)
Solyc02g087970.1.1	-2.32955	1.14841e-09	1.54553e-07	Mini zinc finger protein (AHRD V3.3 *** A0ZXL1_SOLLC)
Solyc09g150101.1.1	-2.30339	0.00687727	0.0470352	Unknown protein
Solyc02g087975.1.1	-2.24337	1.12907e-05	0.000327367	Unknown protein
Solyc05g010270.1.1	-2.20599	0.00379144	0.0303245	hypothetical protein (AHRD V3.3 --* AT5G38790.1)
Solyc04g056620.2.1	-2.16607	6.35847e-06	0.000203502	Auxin Efflux Facilitator 10
Solyc09g075410.4.1	-2.12978	7.0009e-11	1.59419e-08	Pollen Ole e 1 allergen/extensin (AHRD V3.3 *** A0A2U1KBI3_ARTAN)
Solyc01g097690.2.1	-2.1111	7.16189e-09	7.49095e-07	Extensin-like protein Dif10 (AHRD V3.3 *-* Q43504_SOLLC)
Solyc03g118760.4.1	-2.11056	0.00586917	0.0418419	Tubulin beta chain (AHRD V3.3 *** A0A1U8F7H6_CAPAN)
Solyc09g090005.1.1	-2.10535	5.83458e-08	4.15788e-06	Germin-like protein subfamily 1 member 20 (AHRD V3.3 *** A0A2G3CSH1_CAPCH)
Solyc06g060900.1.1	-2.09869	1.04061e-08	9.95918e-07	Unknown protein
Solyc12g098240.1.1	-2.08019	1.22241e-07	7.78688e-06	acanthoscurrin-1-like (AHRD V3.3 *-* XP_010314853.1)
Solyc03g033750.2.1	-2.0702	2.14129e-09	2.63485e-07	AAA-ATPase At3g50940-like (AHRD V3.3 *-* A0A2I4EX93_9ROSI)
Solyc02g079520.3.1	-2.06041	0.000293363	0.00435995	Calcium-binding protein PBP1 (AHRD V3.3 *** A0A1U8G283_CAPAN)
Solyc12g007260.2.1	-2.0431	1.68123e-10	3.50599e-08	Xyloglucan endotransglucosylase/hydrolase (AHRD V3.3 *** A0A2G2YUJ1_CAPAN)
Solyc07g006710.2.1	-2.03289	1.77653e-07	1.05088e-05	Pathogenesis-related protein PR-1 (AHRD V3.3 *** A0A2G3BX31_CAPCH)
Solyc02g084850.3.1	-2.00364	0.000612926	0.00755142	Abscisic acid and environmental stress-inducible protein TAS14 (AHRD V3.3 --* TAS14_SOLLC)
Solyc03g083080.1.1	-2.00324	0.00202092	0.0188052	isoleucine--tRNA ligase, chloroplastic/mitochondrial (AHRD V3.3 --* XP_020871410.1)
Solyc12g049190.3.1	-1.96529	2.49286e-14	2.05775e-11	Hcr2-0B (AHRD V3.3 *** Q9ZTJ9_SOLLC)
Solyc05g046360.3.1	-1.94838	0.00219529	0.0200696	Cell differentiation protein RCD1-like protein (AHRD V3.3 *** A0A2G3CUT5_CAPCH),Pfam:PF04078
Solyc04g050623.1.1	-1.94771	0.000126101	0.00224459	Unknown protein
Solyc06g062690.4.1	-1.93252	0.000195728	0.00320196	Nucleosome assembly protein family (AHRD V3.3 *** A9TVZ4_PHYPA)
Solyc12g098260.1.1	-1.92951	2.03148e-06	8.06525e-05	acanthoscurrin-1-like (AHRD V3.3 *-* XP_010314853.1)
Solyc07g006560.3.1	-1.92638	2.52401e-05	0.00062897	Hypersensitive response assisting protein (AHRD V3.3 *** Q9SWC6_CAPAN)
Solyc05g006190.2.1	-1.91752	2.13674e-07	1.21641e-05	Unknown protein
Solyc03g093070.1.1	-1.89957	2.52037e-06	9.65618e-05	Bifunctional inhibitor/lipid-transfer protein/seed storage 2S albumin superfamily protein (AHRD V3.3 *** A0A2U1PU47_ARTAN)
Solyc01g097720.1.1	-1.87387	4.86973e-08	3.58932e-06	Extensin-like protein Dif10 (AHRD V3.3 *-* Q43504_SOLLC)
Solyc11g007210.3.1	-1.86519	7.07079e-08	4.88081e-06	Peroxidase (AHRD V3.3 *** K4D4Y2_SOLLC)
Solyc10g039270.2.1	-1.86506	0.000250297	0.00384093	Peptidylprolyl isomerase (AHRD V3.3 *** A0A1U8FL13_CAPAN)
Solyc12g038680.1.1	-1.8582	0.000110023	0.00201449	Cysteine/Histidine-rich C1 domain family protein (AHRD V3.3 *-* Q9FIY8_ARATH)
Solyc06g007180.3.1	-1.85663	2.82838e-16	6.22589e-13	asparagine synthetase 1
Solyc04g080560.2.1	-1.84068	0.000387834	0.00537675	Unknown protein
Solyc10g083410.1.1	-1.83801	1.51744e-06	6.3023e-05	Peptidoglycan-binding LysM domain-containing protein (AHRD V3.3 *** A0A2U1LRW5_ARTAN)
Solyc08g066590.3.1	-1.83756	5.1006e-06	0.000170689	Late embryogenesis abundant protein-related / LEA protein-like protein (AHRD V3.3 *-* A0A178VGJ3_ARATH)
Solyc12g035270.2.1	-1.81836	0.00272762	0.0235455	Unknown protein
Solyc10g079230.3.1	-1.80018	1.13251e-07	7.30822e-06	UPF0481 protein At3g47200-like (AHRD V3.3 *** A0A2I4GJF8_9ROSI)
Solyc01g095840.2.1	-1.79922	0.000398257	0.00549051	RING/U-box superfamily protein (AHRD V3.3 *** A0A2U1MJ85_ARTAN)
Solyc04g077990.3.1	-1.79287	0.00277017	0.0238194	LOB domain-containing protein 37 (AHRD V3.3 *** A0A2G3CPS9_CAPCH)
Solyc11g007220.2.1	-1.78749	5.05265e-06	0.000169658	Peroxidase (AHRD V3.3 *** K4D4Y3_SOLLC)
Solyc03g006710.1.1	-1.77513	0.000531043	0.00678304	Calcium-binding protein PBP1 (AHRD V3.3 *** A0A1U8F7L1_CAPAN)
Solyc01g097710.1.1	-1.77007	0.000588995	0.00732491	Extensin-like protein Dif10 (AHRD V3.3 *-* Q43504_SOLLC)
Solyc10g084190.1.1	-1.75615	4.99613e-08	3.65105e-06	Unknown protein
Solyc01g097470.4.1	-1.75296	0.00363745	0.0293052	Neurogenic locus notch-like protein (AHRD V3.3 *** F4JIF2_ARATH)
Solyc11g073150.1.1	-1.75128	0.000367644	0.00515456	Late embryogenesis abundant protein-related / LEA protein-like protein (AHRD V3.3 *** A0A178VGJ3_ARATH)
Solyc12g017870.2.1	-1.74999	6.12926e-10	9.56116e-08	Peroxidase (AHRD V3.3 *** K4DDB5_SOLLC)
Solyc03g083770.1.1	-1.74834	0.000167679	0.00284447	Plant invertase/pectin methylesterase inhibitor superfamily protein, putative (AHRD V3.3 *** A0A061G4U8_THECC)
Solyc12g077440.2.1	-1.744	0.00159061	0.0157243	zinc finger (C2H2 type) family protein (AHRD V3.3 --* AT1G30970.1)
Solyc01g106640.2.1	-1.72984	4.70327e-08	3.48976e-06	Pathogenesis-related protein 1 (AHRD V3.3 *** E2GEU2_9ROSI)
Solyc12g007250.1.1	-1.72038	4.64436e-08	3.459e-06	Xyloglucan endotransglucosylase/hydrolase (AHRD V3.3 *** A0A2G2YUJ1_CAPAN)
Solyc06g074730.4.1	-1.72016	0.000201351	0.00326162	Argonaute 5
Solyc12g098290.1.1	-1.71989	7.35227e-05	0.00147276	acanthoscurrin-1-like (AHRD V3.3 *-* XP_010314853.1)
Solyc08g080430.2.1	-1.71929	0.000738636	0.00875456	Cytochrome P450 (AHRD V3.3 *** A0A200QUP8_9MAGN)
Solyc02g080910.4.1	-1.71899	7.79687e-07	3.69531e-05	Pectate lyase (AHRD V3.3 *** A0A2G3A9B6_CAPAN)
Solyc11g007790.1.1	-1.71449	0.00133034	0.0136224	Disease resistance protein (AHRD V3.3 *** A0A2U1P5P8_ARTAN)
Solyc06g082450.1.1	-1.71248	2.17793e-09	2.66339e-07	ovate family protein
Solyc03g032243.1.1	-1.68262	2.15731e-07	1.2246e-05	IQ domain-containing protein (AHRD V3.3 *-* A0A1Q3B9N0_CEPFO)
Solyc09g090600.3.1	-1.67955	3.12646e-18	1.23877e-14	acid phosphatase 1-like (AHRD V3.3 *** A0A1U7W5M1_NICSY)
Solyc04g006950.4.1	-1.67238	0.00200938	0.0187067	Unknown protein
Solyc12g098300.1.1	-1.6717	5.01913e-05	0.00109388	Unknown protein
Solyc04g071580.3.1	-1.65744	1.25988e-09	1.66396e-07	Abscicic acid stress ripening 2
Solyc08g080060.4.1	-1.65679	9.63726e-10	1.34453e-07	Expansin (AHRD V3.3 *** K4CP06_SOLLC)
Solyc05g015815.1.1	-1.65447	0.000104631	0.00193361	Unknown protein
Solyc01g107220.2.1	-1.65092	5.12013e-06	0.00017093	extensin-2-like (AHRD V3.3 *-* XP_004231387.1)
Solyc04g076770.3.1	-1.64877	7.11764e-07	3.41423e-05	Peroxidase (AHRD V3.3 *** K4BUB5_SOLLC)
Solyc02g082090.3.1	-1.64853	1.43633e-08	1.28756e-06	Peroxidase (AHRD V3.3 *** K4BA79_SOLLC)
Solyc06g034130.2.1	-1.64395	0.00720071	0.0485215	Late embryogenesis abundant protein-related / LEA protein-like protein (AHRD V3.3 *** A0A178VGJ3_ARATH)
Solyc07g049240.3.1	-1.64325	8.64105e-10	1.23157e-07	Peroxidase (AHRD V3.3 *** K4CF27_SOLLC)
Solyc01g005880.1.1	-1.64284	3.26636e-06	0.000117654	Extensin-like protein Dif10 (AHRD V3.3 *-* Q43504_SOLLC)
Solyc05g013460.4.1	-1.64176	1.24353e-08	1.14054e-06	Protein DETOXIFICATION (AHRD V3.3 *** A0A1Q3CW99_CEPFO)
Solyc04g014510.3.1	-1.6407	2.42509e-23	2.40217e-19	glutamine synthase
Solyc01g005860.2.1	-1.62171	7.41671e-05	0.00148117	Unknown protein
Solyc07g053840.1.1	-1.61774	0.000882485	0.0100189	Leucine-rich repeat-containing protein (AHRD V3.3 *** A0A2U1P4T2_ARTAN)
Solyc05g055320.3.1	-1.58913	9.78421e-09	9.50171e-07	Peroxidase (AHRD V3.3 *** K4C2K8_SOLLC)
Solyc12g007270.3.1	-1.5881	4.10703e-07	2.17552e-05	Xyloglucan endotransglucosylase/hydrolase (AHRD V3.3 *** A0A2G2X3I0_CAPBA)
Solyc03g093060.1.1	-1.58178	0.00416362	0.0324785	Bifunctional inhibitor/lipid-transfer protein/seed storage 2S albumin superfamily protein (AHRD V3.3 *** A0A2U1PU47_ARTAN)
Solyc12g088300.2.1	-1.5787	9.10826e-06	0.000271344	hypothetical protein (AHRD V3.3 -** AT4G33800.2)
Solyc09g008590.4.1	-1.5767	5.12555e-10	8.66438e-08	pistil-specific extensin-like protein (AHRD V3.3 *** A0A2I4E0V8_9ROSI),Pfam:PF01190
Solyc05g012230.4.1	-1.55616	0.000223511	0.00352546	hypothetical protein (AHRD V3.3 *-* AT5G61040.1)
Solyc01g009400.3.1	-1.5422	5.33808e-05	0.00115199	Peroxidase (AHRD V3.3 *** K4ATD6_SOLLC)
Solyc06g033860.2.1	-1.53853	3.21361e-06	0.00011679	Glutamate dehydrogenase (AHRD V3.3 *** A0A1U8GQ51_CAPAN)
Solyc03g098060.3.1	-1.52985	0.000548493	0.00696105	zinc-finger homeodomain protein 11-like (AHRD V3.3 *** A0A2I4EVI3_9ROSI)
Solyc06g009610.1.1	-1.52824	6.19538e-07	3.04558e-05	Transcription factor GRAS (AHRD V3.3 *** A0A200PWC4_9MAGN)
Solyc12g044630.2.1	-1.52797	0.00299867	0.0254092	Profilin (AHRD V3.3 *** A0A1U8F126_CAPAN)
Solyc01g005850.2.1	-1.52762	0.00161496	0.01587	Extensin-like protein Dif54 (AHRD V3.3 *-* Q43505_SOLLC)
Solyc06g059880.3.1	-1.52747	1.37277e-07	8.55219e-06	Acetolactate synthase (AHRD V3.3 *** A0A2G3C6U7_CAPCH)
Solyc12g049140.1.1	-1.52507	0.00470512	0.0356695	Extensin-like protein Ext1 (AHRD V3.3 *** Q8VWM5_SOLLC)
Solyc07g045430.4.1	-1.50961	0.000438693	0.00589216	Nudix hydrolase (AHRD V3.3 *** A0A2U1KQS6_ARTAN)
Solyc10g084200.2.1	-1.5052	4.57719e-07	2.39335e-05	Peroxidase (AHRD V3.3 *** K4D3K6_SOLLC)
Solyc01g107370.3.1	-1.50326	0.00101524	0.0111279	Gibberellin-regulated protein (AHRD V3.3 *** K0E174_POPTO)
Solyc03g090990.1.1	-1.50191	0.000164695	0.00280549	Bifunctional inhibitor/lipid-transfer protein/seed storage 2S albumin superfamily protein (AHRD V3.3 *** A0A2U1PU47_ARTAN)
Solyc03g083870.4.1	-1.49259	4.29857e-08	3.25034e-06	Pectinesterase (AHRD V3.3 *** A0A200QC54_9MAGN)
Solyc12g014500.3.1	-1.4763	0.00125455	0.013033	S-adenosyl-L-methionine-dependent methyltransferases superfamily protein (AHRD V3.3 *** A0A2U1QHF5_ARTAN)
Solyc03g118900.3.1	-1.47138	0.000462927	0.00612628	WAT1-related protein (AHRD V3.3 *** K4BM39_SOLLC)
Solyc12g009290.1.1	-1.46806	8.23294e-06	0.000249775	Auxin responsive SAUR protein (AHRD V3.3 *** A0A2U1PXP1_ARTAN)
Solyc08g081780.1.1	-1.46602	6.21664e-20	4.10526e-16	Dirigent protein (AHRD V3.3 *** K4CPH4_SOLLC)
Solyc09g059470.4.1	-1.46475	2.81373e-09	3.358e-07	hypothetical protein (AHRD V3.3 *** AT3G07210.1)
Solyc10g005190.1.1	-1.46457	4.49293e-07	2.361e-05	Root hair specific 4 (AHRD V3.3 *** Q9SY31_ARATH)
Solyc10g076760.3.1	-1.46328	0.00610062	0.0430564	Protein kinase superfamily protein (AHRD V3.3 *** A0A2U1LJI2_ARTAN)
Solyc03g118710.3.1	-1.4625	2.27111e-13	1.32332e-10	Calcium-dependent lipid-binding (CaLB domain) family protein (AHRD V3.3 *** A0A2U1LMA8_ARTAN)
Solyc06g051040.4.1	-1.45879	4.7214e-06	0.000160714	Mitotic checkpoint serine/threonine-protein kinase BUB1-like protein (AHRD V3.3 *-* A0A2K3L1J0_TRIPR)
Solyc10g080380.1.1	-1.45052	0.000308863	0.00453392	Unknown protein
Solyc06g036110.1.1	-1.44997	1.06585e-08	1.01032e-06	Calcium-dependent lipid-binding (CaLB domain) family protein (AHRD V3.3 *** A0A2U1LCI8_ARTAN)
Solyc06g035980.4.1	-1.44832	2.86978e-07	1.58808e-05	Unknown protein
Solyc01g067870.3.1	-1.44636	7.21302e-05	0.00145221	Peroxidase (AHRD V3.3 *** K4AX35_SOLLC)
Solyc08g079240.4.1	-1.44181	0.00485361	0.0364361	dimethylallyl%2C adenosine tRNA methylthiotransferase (AHRD V3.3 *** AT1G62780.1)
Solyc02g014300.2.1	-1.4381	8.37791e-06	0.000253397	Pectinesterase (AHRD V3.3 *** A0A2G2VTJ6_CAPBA)
Solyc03g025490.3.1	-1.43684	1.39607e-15	1.84384e-12	2-oxoglutarate (2OG) and Fe(II)-dependent oxygenase superfamily protein (AHRD V3.3 *** A0A2U1MKA4_ARTAN)
Solyc09g014560.2.1	-1.43652	0.000752341	0.00885073	MLP-like protein 28 (AHRD V3.3 *-* A8MR61_ARATH)
Solyc08g007780.3.1	-1.43338	1.10815e-05	0.000323323	Expansin (AHRD V3.3 *** K4CIR5_SOLLC)
Solyc06g067950.3.1	-1.43306	6.88679e-07	3.32766e-05	Alpha/beta-Hydrolases superfamily protein (AHRD V3.3 *** A0A2U1Q9V2_ARTAN)
Solyc03g118930.2.1	-1.43138	4.36131e-06	0.000150526	Glycosyltransferase (AHRD V3.3 *** Q9LV22_ARATH)
Solyc08g067500.1.1	-1.43126	8.70234e-06	0.000260772	Non-specific lipid-transfer protein (AHRD V3.3 *** K4CLX6_SOLLC)
Solyc01g100000.3.1	-1.42664	0.000403924	0.00556007	F-box domain, Phloem protein 2-like protein (AHRD V3.3 *** A0A2U1MNC1_ARTAN)
Solyc12g037950.2.1	-1.4249	8.45663e-09	8.37671e-07	protein PLANT CADMIUM RESISTANCE 2-like (AHRD V3.3 *** A0A1U8N9B3_GOSHI)
Solyc09g066360.1.1	-1.41367	0.00395175	0.0312877	Ethylene Response Factor C.3
Solyc08g007240.4.1	-1.41187	2.24574e-05	0.000570389	Nudix hydrolase 8 (AHRD V3.3 *** A0A1U8EVF7_CAPAN)
Solyc05g011960.4.1	-1.4114	5.48548e-06	0.00018022	DnaJ domain-containing protein (AHRD V3.3 *-* A0A1Q3CHH1_CEPFO)
Solyc07g052530.3.1	-1.41087	7.03878e-12	2.14531e-09	Peroxidase (AHRD V3.3 *** K4CFF2_SOLLC)
Solyc03g093380.2.1	-1.40507	1.65097e-05	0.000446132	Protein kinase family protein (AHRD V3.3 *** A0A1P8AW67_ARATH)
Solyc03g059080.3.1	-1.40472	4.92547e-05	0.0010806	Protein kinase superfamily protein (AHRD V3.3 *** A0A1I9LM53_ARATH)
Solyc12g088000.2.1	-1.40255	0.000325423	0.00470925	Tyrosine aminotransferase (AHRD V3.3 *** A0A2G2VLJ4_CAPBA)
Solyc03g091010.1.1	-1.40071	0.00254815	0.0224462	Bifunctional inhibitor/lipid-transfer protein/seed storage 2S albumin superfamily protein (AHRD V3.3 *** A0A2U1PU47_ARTAN)
Solyc01g107710.2.1	-1.39447	0.00108265	0.0117027	Late embryogenesis abundant protein-related / LEA protein-like protein (AHRD V3.3 *-* A0A178VGJ3_ARATH)
Solyc02g089920.1.1	-1.38068	5.68958e-05	0.00120681	Protein kinase domain (AHRD V3.3 *** A0A200R7I5_9MAGN)
Solyc01g059900.4.1	-1.38041	8.09064e-07	3.78921e-05	Dirigent protein (AHRD V3.3 *** K4AW97_SOLLC)
Solyc11g039570.3.1	-1.37952	1.55437e-06	6.41534e-05	Peroxidase (AHRD V3.3 *** K4D7T6_SOLLC)
Solyc01g010180.3.1	-1.37939	5.13178e-08	3.72402e-06	Unknown protein
Solyc12g100080.1.1	-1.37637	0.000206671	0.00331891	Extensin-like protein Ext1 (AHRD V3.3 *** Q8VWM5_SOLLC)
Solyc01g109860.3.1	-1.37316	1.07947e-07	7.08124e-06	Sec14p-like phosphatidylinositol transfer family protein (AHRD V3.3 *** A0A2U1QM07_ARTAN)
Solyc06g066560.3.1	-1.36997	0.00178663	0.0171987	tonoplast intrinsic protein 2.5
Solyc10g085500.2.1	-1.3615	0.00271152	0.0234474	Cytochrome P450 (AHRD V3.3 *** A0A2U1LHU2_ARTAN)
Solyc02g062690.3.1	-1.35843	0.00145552	0.014667	bHLH transcription factor 012
Solyc02g081990.3.1	-1.35653	2.19548e-18	1.08737e-14	Pectinesterase (AHRD V3.3 *** A0A2G2XFI1_CAPBA)
Solyc07g065420.1.1	-1.34371	3.50749e-08	2.7357e-06	Protein MIZU-KUSSEI 1 (AHRD V3.3 *** A0A1U8GTQ9_CAPAN)
Solyc06g072530.3.1	-1.34285	1.13947e-05	0.000329066	CASP-like protein (AHRD V3.3 *** A0A328D0P9_9ASTE)
Solyc02g030220.1.1	-1.34266	0.00668936	0.0460252	Extensin-like protein Dif10 (AHRD V3.3 *-* Q43504_SOLLC)
Solyc05g009580.3.1	-1.33063	0.000715384	0.0085531	Aluminum-activated malate transporter 9 (AHRD V3.3 *** A0A2G3B6A6_CAPCH)
Solyc08g075830.4.1	-1.32364	5.24946e-12	1.62495e-09	Peroxidase (AHRD V3.3 *** K4CMV0_SOLLC)
Solyc03g114820.3.1	-1.32352	4.39583e-08	3.31125e-06	Adenine nucleotide alpha hydrolases-like superfamily protein (AHRD V3.3 *** Q9M9P7_ARATH)
Solyc04g008000.3.1	-1.32288	0.00538246	0.0392689	Calcium-dependent protein kinase (AHRD V3.3 *-* CDPK_DAUCA)
Solyc01g009370.2.1	-1.31437	8.1574e-09	8.24522e-07	Cytochrome P450 (AHRD V3.3 *** A0A2U1MC34_ARTAN)
Solyc07g052660.1.1	-1.31348	3.61089e-10	6.68555e-08	Early nodulin-like protein 1-like (AHRD V3.3 *-* A0A2K3MXQ1_TRIPR)
Solyc06g008330.2.1	-1.31323	6.37129e-09	6.74982e-07	Serine/threonine-protein kinase (AHRD V3.3 *** A0A2I0WHR6_9ASPA)
Solyc11g069970.1.1	-1.31307	0.00616921	0.0434477	Late embryogenesis abundant (LEA) hydroxyproline-rich glycoprotein family (AHRD V3.3 *** A0A2U1MMJ0_ARTAN)
Solyc09g091600.4.1	-1.30999	0.00176261	0.0170005	Protein SULFUR DEFICIENCY-INDUCED 1 (AHRD V3.3 *** A0A2G2ZTV9_CAPAN)
Solyc05g056020.3.1	-1.30407	9.76228e-15	9.20955e-12	V-type proton ATPase subunit G (AHRD V3.3 *** A0A1U8GRL1_CAPAN)
Solyc12g088330.1.1	-1.3039	9.08759e-05	0.00173778	ZCF37 (AHRD V3.3 *** A0A2U1NT51_ARTAN)
Solyc04g014530.1.1	-1.30185	0.00647741	0.0449944	Ethylene Response Factor C.2
Solyc11g006290.2.1	-1.30026	0.00103854	0.0113412	3-oxo-5-alpha-steroid 4-dehydrogenase (AHRD V3.3 *** A0A200PYH0_9MAGN)
Solyc06g084320.1.1	-1.2992	0.00503123	0.0373667	EID1-like F-box protein 3 (AHRD V3.3 *** A0A2G2ZF18_CAPAN)
Solyc08g005280.2.1	-1.29793	0.000596917	0.0074002	Cellulose synthase (AHRD V3.3 *** A0A2U1KRA4_ARTAN)
Solyc07g055730.4.1	-1.29734	1.18011e-05	0.000336391	Protein trichome birefringence-like 43 (AHRD V3.3 *** A0A2G3C1G9_CAPCH)
Solyc07g045060.1.1	-1.29347	0.000976526	0.010802	Auxin responsive protein (AHRD V3.3 *** Q75GP8_ORYSJ)
Solyc06g083000.1.1	-1.29205	0.00164166	0.0160613	Calmodulin-like protein 5 (AHRD V3.3 *** A0A2G2WMY5_CAPBA)
Solyc08g079250.4.1	-1.29164	2.37623e-15	2.94222e-12	Bifunctional inhibitor/lipid-transfer protein/seed storage 2S albumin superfamily protein (AHRD V3.3 *** A0A2U1L4X0_ARTAN)
Solyc09g025230.4.1	-1.29098	7.45354e-05	0.00148553	patellin-4-like (AHRD V3.3 *** A0A2I4F6C8_9ROSI)
Solyc12g005787.1.1	-1.28977	9.88269e-09	9.55054e-07	Peroxidase (AHRD V3.3 *** K4CMV0_SOLLC)
Solyc12g100250.3.1	-1.28832	7.34805e-08	5.05459e-06	Fatty acid desaturase (AHRD V3.3 *** A0A200QRI1_9MAGN)
Solyc02g014220.3.1	-1.28693	1.77725e-06	7.18552e-05	Endoglucanase (AHRD V3.3 *** A0A2G3D2B5_CAPCH)
Solyc01g100760.2.1	-1.28519	0.00046188	0.00611651	DUF538 domain-containing protein (AHRD V3.3 *** A0A1Q3CLQ5_CEPFO)
Solyc11g066640.1.1	-1.28444	0.00210259	0.0194465	Transferase (AHRD V3.3 *** A0A200R9R6_9MAGN)
Solyc03g114420.1.1	-1.28343	6.48719e-07	3.14994e-05	Calmodulin (AHRD V3.3 *** B6SJJ2_MAIZE)
Solyc12g100300.2.1	-1.28028	6.1521e-06	0.000197856	Metal tolerance protein 3 (AHRD V3.3 *** A0A2G2YBF6_CAPAN)
Solyc07g043200.2.1	-1.2796	6.77126e-05	0.00138965	Zinc transporter protein (AHRD V3.3 *** A5BDR3_VITVI)
Solyc03g019870.4.1	-1.27431	0.000429644	0.00581002	Cytochrome P450 (AHRD V3.3 *** A0A200QAC3_9MAGN)
Solyc05g018050.1.1	-1.27392	0.000743627	0.00878998	RING/U-box superfamily protein (AHRD V3.3 *-* A0A2U1KYA3_ARTAN)
Solyc11g007030.3.1	-1.26128	5.57396e-07	2.80982e-05	Alpha/beta-Hydrolases superfamily protein (AHRD V3.3 *** A0A2U1MAY4_ARTAN)
Solyc10g086710.3.1	-1.26034	1.22261e-11	3.51515e-09	PAR1 (AHRD V3.3 *** A0A200R4T9_9MAGN)
Solyc12g057140.1.1	-1.25941	3.86933e-15	4.25863e-12	Unknown protein
Solyc01g097680.2.1	-1.25701	0.00211198	0.019506	Extensin-like protein Dif10 (AHRD V3.3 *-* Q43504_SOLLC)
Solyc07g052540.3.1	-1.25656	1.61247e-09	2.06095e-07	Peroxidase (AHRD V3.3 *** K4CFF3_SOLLC)
Solyc02g072170.3.1	-1.25647	0.000634942	0.00777432	hypothetical protein (AHRD V3.3 --* AT4G15140.1)
Solyc02g083285.2.1	-1.24755	9.22425e-05	0.00175882	Protein IQ-DOMAIN 31 (AHRD V3.3 *-* A0A1J3ETM1_NOCCA)
Solyc01g104110.4.1	-1.24069	5.22235e-16	1.0346e-12	11-S seed storage protein (AHRD V3.3 *** A0A2U1KM33_ARTAN)
Solyc01g005370.3.1	-1.23942	9.84281e-06	0.000290605	Calcium-dependent protein kinase (AHRD V3.3 *-* CDPK_DAUCA)
Solyc12g044710.1.1	-1.2382	0.00270633	0.0234229	hydroxyproline-rich glycoprotein family protein (AHRD V3.3 *** AT5G09530.1)
Solyc04g054195.1.1	-1.23714	0.00188123	0.0178406	Unknown protein
Solyc10g082040.2.1	-1.23617	0.003558	0.0287962	HVA22-like protein (AHRD V3.3 *** A0A1U8ENC8_CAPAN)
Solyc05g052500.4.1	-1.23582	4.11872e-10	7.41782e-08	S-adenosyl-L-methionine-dependent methyltransferases superfamily protein (AHRD V3.3 *** A0A1I9LPV2_ARATH)
Solyc12g049170.2.1	-1.22783	0.000445787	0.00596426	Extensin-like protein Ext1 (AHRD V3.3 *** Q8VWM5_SOLLC)
Solyc12g005783.1.1	-1.2229	1.94479e-07	1.12986e-05	Peroxidase (AHRD V3.3 *** K4CMV0_SOLLC)
Solyc02g092550.3.1	-1.21822	2.75642e-06	0.000103033	LOB domain-containing protein 38 (AHRD V3.3 *** A0A2G2XGY4_CAPBA)
Solyc06g075570.2.1	-1.21485	0.000214807	0.00341811	Respiratory burst oxidase (AHRD V3.3 *** A0A2U1P7U6_ARTAN)
Solyc06g075090.4.1	-1.21333	0.00477181	0.0360285	Cytokinin riboside 5'-monophosphate phosphoribohydrolase (AHRD V3.3 *** A0A2G3CAR7_CAPCH)
Solyc08g083220.1.1	-1.21318	0.00308831	0.0259139	Branchless trichome (AHRD V3.3 *** A0A2U1NJ24_ARTAN)
Solyc01g098960.3.1	-1.21172	7.44014e-05	0.00148436	Hexosyltransferase (AHRD V3.3 *** A0A2G3BUG9_CAPCH)
Solyc12g089360.1.1	-1.21059	2.579e-05	0.000640258	Peroxidase (AHRD V3.3 *** K4DH07_SOLLC)
Solyc10g037880.3.1	-1.20201	1.02351e-08	9.84311e-07	Blue copper protein (AHRD V3.3 *** A0A2I0WGC8_9ASPA)
Solyc12g087860.3.1	-1.20156	9.93833e-05	0.00185312	RING/U-box superfamily protein (AHRD V3.3 *** A0A2H1ZED7_ARATH)
Solyc10g085010.3.1	-1.20125	1.24446e-10	2.70922e-08	PAR1-like protein (AHRD V3.3 *** A0A2U1KIG3_ARTAN)
Solyc06g034410.3.1	-1.19908	3.30779e-05	0.000784798	DUF1442 domain-containing protein (AHRD V3.3 *** A0A1Q3BAQ3_CEPFO)
Solyc12g100110.1.1	-1.19884	0.000116944	0.00211771	Extensin-like protein Ext1 (AHRD V3.3 *** Q8VWM5_SOLLC)
Solyc12g005710.3.1	-1.19828	5.16853e-13	2.49741e-10	Early nodulin-like protein 1-like (AHRD V3.3 *-* A0A2K3MXQ1_TRIPR)
Solyc01g080790.3.1	-1.19621	8.70355e-07	4.01925e-05	Plant basic secretory protein (BSP) family protein (AHRD V3.3 *** I3SK49_MEDTR)
Solyc11g069390.1.1	-1.19393	6.57861e-05	0.00135759	arabinogalactan protein 1 (AHRD V3.3 *** XP_004251131.1)
Solyc12g049070.1.1	-1.19347	0.00290858	0.0248584	extensin-like
Solyc09g098160.3.1	-1.18938	2.16982e-12	7.96043e-10	pirin
Solyc04g015040.3.1	-1.18338	0.00111865	0.0120052	Peptidylprolyl isomerase (AHRD V3.3 *** A0A2G2XYE0_CAPAN)
Solyc02g014830.4.1	-1.18329	7.53567e-13	3.47184e-10	Carboxypeptidase (AHRD V3.3 *** A0A2G2XBM8_CAPBA)
Solyc05g005540.4.1	-1.18221	7.57617e-05	0.00150266	Polygalacturonase-1 non-catalytic subunit beta (AHRD V3.3 *** GP1_SOLLC)
Solyc02g093660.1.1	-1.18173	4.94673e-05	0.00108287	Unknown protein
Solyc06g008240.3.1	-1.18	0.00665866	0.0458951	CRIB domain-containing protein RIC6 (AHRD V3.3 *** A0A2G2Z6W9_CAPAN)
Solyc09g074610.3.1	-1.17854	0.00714134	0.0482692	Chaperone protein DnaJ (AHRD V3.3 *** A0A2G3CTT7_CAPCH)
Solyc04g011760.3.1	-1.17843	5.41316e-14	3.69794e-11	Unknown protein
Solyc12g100100.1.1	-1.17166	0.00134218	0.0137017	Extensin-like protein Ext1 (AHRD V3.3 *** Q8VWM5_SOLLC)
Solyc01g079370.4.1	-1.16776	4.31591e-07	2.28007e-05	Transcription factor GRAS (AHRD V3.3 *** A0A200PWC4_9MAGN)
Solyc10g083180.2.1	-1.16273	0.00236757	0.0212716	NAD(P)-binding Rossmann-fold superfamily protein (AHRD V3.3 *** A0A2U1PL19_ARTAN),Pfam:PF13561
Solyc12g098250.1.1	-1.16266	0.0022777	0.0206626	acanthoscurrin-1-like (AHRD V3.3 *-* XP_010314853.1)
Solyc03g096760.1.1	-1.16103	0.00717357	0.048421	Protein RESPONSE TO LOW SULFUR 2 (AHRD V3.3 *-* LSU2_ARATH)
Solyc10g076660.2.1	-1.16102	0.00079661	0.00925067	2-oxoglutarate (2OG) and Fe(II)-dependent oxygenase superfamily protein (AHRD V3.3 *** F4J670_ARATH)
Solyc03g120650.4.1	-1.15153	0.000689266	0.00832625	GDP-mannose pyrophosphorylase
Solyc03g031530.4.1	-1.15024	9.01365e-05	0.00172531	Sulfite exporter TauE/SafE family protein 2 (AHRD V3.3 *** TAUE2_ARATH)
Solyc01g088780.3.1	-1.14943	0.000524991	0.00671873	Rac-like GTP binding protein (AHRD V3.3 *** Q9S821_PHYPA)
Solyc06g009280.1.1	-1.1494	0.000118159	0.00213192	ABC transporter B family member (AHRD V3.3 *** A0A2K3NLX3_TRIPR)
Solyc08g076630.3.1	-1.14675	0.00117762	0.0125026	Eukaryotic aspartyl protease family protein (AHRD V3.3 *** A0A2U1ML86_ARTAN)
Solyc05g018310.1.1	-1.14505	0.00102566	0.01122	RING/U-box superfamily protein (AHRD V3.3 *** A0A2U1QGT0_ARTAN)
Solyc02g084360.3.1	-1.1393	1.15038e-24	2.27902e-20	V-type proton ATPase proteolipid subunit (AHRD V3.3 *** A0A2G3AAA7_CAPAN)
Solyc04g051680.4.1	-1.13672	0.000168583	0.00285453	Ras GTPase (AHRD V3.3 *** K2SFN1_MACPH)
Solyc01g107140.3.1	-1.1364	0.00291359	0.0248905	Transcription factor (AHRD V3.3 *** A0A2G2V728_CAPBA)
Solyc07g009050.3.1	-1.13399	1.79397e-08	1.54523e-06	defensin-like protein 19 (AHRD V3.3 *** A0A1S4AH79_TOBAC)
Solyc12g077370.3.1	-1.13192	0.000216268	0.0034318	Non-specific serine/threonine protein kinase (AHRD V3.3 *** A0A2G2XM37_CAPBA)
Solyc01g009410.3.1	-1.13183	0.000198962	0.00324656	Peroxidase (AHRD V3.3 *** K4ATD7_SOLLC)
Solyc12g100220.2.1	-1.12729	2.58646e-05	0.000641307	NAD(P)-binding Rossmann-fold superfamily protein (AHRD V3.3 *** Q94AL3_ARATH)
Solyc07g009020.2.1	-1.12079	5.79945e-08	4.14776e-06	defensin-like protein 19 (AHRD V3.3 *** A0A1S4AH79_TOBAC)
Solyc10g081780.3.1	-1.12078	0.00374177	0.0299992	RING-H2 finger protein ATL70 (AHRD V3.3 *** A0A2G3AVP6_CAPCH)
Solyc12g096400.2.1	-1.11884	8.2459e-07	3.84375e-05	Plant calmodulin-binding-like protein (AHRD V3.3 *-* G7L455_MEDTR)
Solyc11g066390.2.1	-1.1185	8.22435e-16	1.25333e-12	superoxide dismutase 3
Solyc05g007790.3.1	-1.11663	1.67411e-08	1.46751e-06	Casparian strip membrane protein 1 (AHRD V3.3 *** CASP1_SOLDE)
Solyc06g009510.1.1	-1.11327	2.84955e-05	0.000697805	transcription factor UPBEAT1 (AHRD V3.3 *-* A0A2I4GEI3_9ROSI)
Solyc12g010470.3.1	-1.10381	0.00400679	0.0316123	PLATZ transcription factor family protein (AHRD V3.3 *** A0A2U1NVF3_ARTAN)
Solyc04g074730.1.1	-1.1021	2.44238e-12	8.64034e-10	classical arabinogalactan protein 5 (AHRD V3.3 --* XP_004237948.1)
Solyc10g008900.3.1	-1.09932	1.55128e-06	6.41534e-05	Dirigent protein (AHRD V3.3 *** K4CY66_SOLLC)
Solyc02g080230.3.1	-1.09903	0.00102242	0.0111907	CRIB domain-containing protein RIC10 (AHRD V3.3 *** A0A1U8FUJ1_CAPAN)
Solyc12g009650.2.1	-1.09791	0.00020673	0.00331891	Sl proline-rich protein
Solyc09g057580.4.1	-1.09612	5.16075e-10	8.66438e-08	DUF760 domain-containing protein (AHRD V3.3 *-* A0A1Q3CD93_CEPFO)
Solyc01g006840.3.1	-1.0959	8.54685e-05	0.00165353	Calcium-dependent protein kinase (AHRD V3.3 *** B8QUH1_GOSHI)
Solyc04g058160.2.1	-1.09573	0.000247728	0.00381036	Calcium-dependent protein kinase (AHRD V3.3 --* CDPK_DAUCA)
Solyc05g055970.4.1	-1.09204	2.01631e-05	0.000523788	Ankyrin repeat (AHRD V3.3 *-* A0A200Q4D4_9MAGN)
Solyc11g045520.2.1	-1.08978	0.00319274	0.0265651	2-oxoglutarate (2OG) and Fe(II)-dependent oxygenase superfamily protein (AHRD V3.3 *** A0A2U1QIJ9_ARTAN)
Solyc01g087020.2.1	-1.08971	4.79928e-11	1.13609e-08	Unknown protein
Solyc04g081860.3.1	-1.088	4.09855e-06	0.000143456	Peroxidase (AHRD V3.3 *** K4BVR5_SOLLC)
Solyc09g005630.3.1	-1.0789	2.08713e-06	8.25313e-05	Protein trichome birefringence-like 3 (AHRD V3.3 *** A0A1U8EDH5_CAPAN)
Solyc02g067190.4.1	-1.07764	0.00159926	0.0157784	Casparian strip membrane protein 1 (AHRD V3.3 *** CASP1_SOLTU)
Solyc02g078450.3.1	-1.07752	0.000793989	0.00922587	tetraspanin-19-like (AHRD V3.3 *** A0A2I4GWP3_9ROSI)
Solyc03g122320.1.1	-1.07439	0.00278717	0.0239552	Unknown protein
Solyc05g005470.4.1	-1.07415	4.51235e-08	3.37337e-06	DC1 domain-containing protein (AHRD V3.3 *** A0A2U1QM98_ARTAN)
Solyc09g009440.3.1	-1.07392	0.00566352	0.0407112	Iron-sulfur assembly protein IscA-like 1, mitochondrial (AHRD V3.3 *** A0A2G2YPA5_CAPAN)
Solyc12g011430.3.1	-1.06914	0.000519985	0.0066849	Beta-lactamase-like (AHRD V3.3 *** A0A200QS30_9MAGN)
Solyc02g082150.1.1	-1.06562	0.000849441	0.00974423	BnaCnng18720D protein (AHRD V3.3 *** A0A078IGP5_BRANA)
Solyc05g010460.4.1	-1.06547	0.00392452	0.0311322	hypothetical protein (DUF1262) (AHRD V3.3 *** AT1G13490.2)
Solyc01g105220.3.1	-1.06369	0.00437285	0.0336429	alternative oxidase 2
Solyc04g015610.3.1	-1.06257	7.13808e-05	0.00144298	DUF642 domain-containing protein (AHRD V3.3 *** A0A1Q3AUQ6_CEPFO)
Solyc08g069170.3.1	-1.05912	3.9111e-06	0.000137625	Receptor protein kinase, putative (AHRD V3.3 *** B9RHT1_RICCO)
Solyc04g071080.2.1	-1.05714	0.000331068	0.0047811	extensin-like, partial (AHRD V3.3 *-* XP_019067293.2)
Solyc02g093250.3.1	-1.05626	2.1327e-16	5.28137e-13	Caffeoyl-CoA O-methyltransferase (AHRD V3.3 *** A0A1U8FPA5_CAPAN)
Solyc11g069250.2.1	-1.04918	0.0026116	0.0228829	Fasciclin-like arabinogalactan protein 12 (AHRD V3.3 *** A0A1J6K653_NICAT)
Solyc01g006520.3.1	-1.04815	0.00713477	0.0482577	Receptor-like protein kinase (AHRD V3.3 *** A0A2U1PPA0_ARTAN)
Solyc10g055190.1.1	-1.04641	0.00200067	0.0186454	Dirigent protein (AHRD V3.3 *** K4D1B2_SOLLC)
Solyc06g008930.3.1	-1.04486	2.95503e-06	0.000109425	Unknown protein
Solyc10g079810.1.1	-1.04338	3.77665e-05	0.000863964	Unknown protein
Solyc02g064945.1.1	-1.04248	0.00182494	0.0174826	Glucuronoxylan 4-o-methyltransferase 1-like protein (AHRD V3.3 *** A0A2K3MTC9_TRIPR)
Solyc07g049560.3.1	-1.0416	2.0897e-05	0.00053765	Protein-tyrosine phosphatase (AHRD V3.3 *** A0A200RBI0_9MAGN)
Solyc12g017350.2.1	-1.04082	0.000210837	0.00336304	Cation efflux protein (AHRD V3.3 *** A0A200Q589_9MAGN)
Solyc01g097570.2.1	-1.04069	6.37372e-07	3.10245e-05	Protein SUPPRESSOR OF K(+) TRANSPORT GROWTH DEFECT 1 (AHRD V3.3 *-* A0A2G2W7B7_CAPBA)
Solyc09g031920.1.1	-1.03781	0.000181406	0.00302002	Late embryogenesis abundant protein, LEA-14 (AHRD V3.3 *** A0A2U1NFB4_ARTAN)
Solyc04g079030.2.1	-1.0368	0.000272899	0.00411759	Glycosyltransferase (AHRD V3.3 *** V4NB36_EUTSA)
Solyc02g080190.3.1	-1.03606	1.2671e-06	5.46897e-05	Nuclear transport factor 2 (AHRD V3.3 *** A0A2G3A947_CAPAN)
Solyc05g046030.4.1	-1.034	1.77702e-07	1.05088e-05	Peroxidase (AHRD V3.3 *** K4C0T6_SOLLC)
Solyc06g072400.3.1	-1.03363	0.000741725	0.00877272	Type I inositol polyphosphate 5-phosphatase 5 (AHRD V3.3 *-* IP5P5_ARATH)
Solyc07g041770.1.1	-1.03268	0.002923	0.0249494	Putative membrane lipoprotein (AHRD V3.3 *** AT3G42725.1)
Solyc01g105800.4.1	-1.03121	4.87685e-09	5.2898e-07	MADS-box protein JOINTLESS (AHRD V3.3 *** A0A2G3AWN8_CAPCH)
Solyc04g071700.3.1	-1.02789	0.00666268	0.0458951	5-formyltetrahydrofolate cyclo-ligase-like protein (AHRD V3.3 *** A0A2G3CMU4_CAPCH)
Solyc05g053080.2.1	-1.02779	5.54884e-08	3.99738e-06	Unknown protein
Solyc02g086840.3.1	-1.02461	0.000178712	0.00298773	Tetratricopeptide repeat (TPR)-like superfamily protein (AHRD V3.3 *** A0A2U1LHI7_ARTAN)
Solyc11g008630.3.1	-1.02428	0.000420762	0.00573433	HXXXD-type acyl-transferase family protein (AHRD V3.3 *** A0A2U1LG13_ARTAN)
Solyc10g055197.1.1	-1.02371	8.10809e-06	0.000247122	Dirigent protein (AHRD V3.3 *** M1BZH9_SOLTU)
Solyc06g083500.4.1	-1.02269	5.62564e-06	0.000184214	Serine/threonine-protein kinase PBS1 (AHRD V3.3 *** A0A2G2WN41_CAPBA)
Solyc08g079590.3.1	-1.02137	0.000421153	0.00573433	PPR containing protein (AHRD V3.3 *** AT4G22758.1)
Solyc04g011467.1.1	-1.02107	1.36261e-06	5.79287e-05	CASP-like protein (AHRD V3.3 *** A0A2G2XA87_CAPBA)
Solyc03g120600.4.1	-1.01556	0.000189198	0.00311831	Plant cadmium resistance protein (AHRD V3.3 *** Q2HU50_MEDTR)
Solyc04g078040.3.1	-1.01362	0.000242732	0.00375978	Peroxisomal membrane 22 kDa (Mpv17/PMP22) family protein (AHRD V3.3 *** A0A2U1NNX3_ARTAN)
Solyc07g047740.3.1	-1.01304	6.09505e-08	4.29712e-06	TOMTPX2A peroxidase
Solyc03g116060.4.1	-1.01138	0.000200716	0.00325667	Gibberellin-regulated protein 6 (AHRD V3.3 *** A0A2G3CZG9_CAPCH)
Solyc03g091000.1.1	-1.00752	0.000285037	0.00427469	Bifunctional inhibitor/lipid-transfer protein/seed storage 2S albumin superfamily protein (AHRD V3.3 *** A0A2U1PU47_ARTAN)
Solyc07g043700.3.1	-1.0055	0.000254805	0.00389803	HXXXD-type acyl-transferase family protein (AHRD V3.3 *** F4JBC7_ARATH)
Solyc11g073030.1.1	-1.00518	0.000966034	0.0107156	Dirigent protein (AHRD V3.3 *** K4DB09_SOLLC)
Solyc06g053290.1.1	-1.00428	1.63857e-10	3.45338e-08	SAUR-like auxin-responsive family protein (AHRD V3.3 *** A0A2K3LI44_TRIPR)
Solyc12g006630.2.1	-1.00379	0.00553364	0.0400683	Dynein light chain (AHRD V3.3 *** A0A2G2YUH7_CAPAN)
Solyc01g005630.3.1	-1.00332	0.00232799	0.02104	Ethylene-responsive transcription factor (AHRD V3.3 *** A0A2G3BR89_CAPCH)
Solyc04g074470.1.1	-1.00113	2.10313e-08	1.77298e-06	Protein EXORDIUM-like 2 (AHRD V3.3 *** A0A2G3CNT3_CAPCH)
Solyc12g010800.2.1	-1.00062	0.000114597	0.00208091	Basic-leucine zipper (BZIP) transcription factor family protein (AHRD V3.3 *** A0A1I9LST2_ARATH)
Solyc10g007600.3.1	-1.00013	0.00185226	0.0176685	glycolate oxidase
