# Supplementary material for: Application of ethanol alleviates heat damage to leaf growth and yield in tomato
Source: Front Plant Sci. 2024 Feb 19;15:1325365. doi: 10.3389/fpls.2024.1325365 (PMC10909983; doi:10.3389/fpls.2024.1325365)
Supplement: Supplementary file 5 [file Table_4.xlsx]

## Sheet: UP
Supplemental Table S4. Up-regulated DEGs of E3H30m vs W3H30m in shoot (log2 fold change ≧ 1.0, p_value < 0.05, p_adj < 0.05).
GeneID	log2FoldChange	p_value	p_adj	Annotation	IDR
Solyc11g072310.2.1	5.01068	0.000145588	0.00149984	gibberellin 20-oxidase-3	FALSE
Solyc08g067630.3.1	4.78963	7.85376e-11	3.70139e-09	histone deacetylase-like protein (AHRD V3.3 *** AT2G25625.2)	TRUE
Solyc02g085590.4.1	4.22573	0.000615518	0.00504273	vicilin-like seed storage protein At2g18540 (AHRD V3.3 *-* A0A2I4F3W3_9ROSI)	TRUE
Solyc04g008930.2.1	4.21696	0.000277049	0.0025778	GRAM domain (AHRD V3.3 *** A0A200Q501_9MAGN)	FALSE
Solyc07g006380.3.1	4.19483	0.00261394	0.0165852	Defensin-like protein (AHRD V3.3 *** A0A1U8HFN5_CAPAN)	FALSE
Solyc07g053240.3.1	4.14432	0.000540904	0.00453922	R2R3MYB transcription factor 81	TRUE
Solyc08g078760.1.1	3.78701	0.00590943	0.0316722	transmembrane protein (AHRD V3.3 *** AT4G17250.1)	FALSE
Solyc02g084850.3.1	3.75871	6.88768e-13	4.75276e-11	Abscisic acid and environmental stress-inducible protein TAS14 (AHRD V3.3 --* TAS14_SOLLC)	TRUE
Solyc04g008940.4.1	3.71087	0.000210226	0.00204696	GRAM domain-containing protein (AHRD V3.3 *** A0A1Q3B313_CEPFO)	FALSE
Solyc04g009040.4.1	3.67456	0.00227688	0.0149176	Receptor-kinase, putative (AHRD V3.3 *** B9SZK5_RICCO)	TRUE
Solyc12g096020.3.1	3.66485	0.00259664	0.0165155	Protein phosphatase 2c (AHRD V3.3 *** F8WL78_CITUN)	TRUE
Solyc12g100010.1.1	3.62064	0.00151029	0.0107712	receptor-like protein 12 (AHRD V3.3 *** A0A1U8ETX1_CAPAN)	FALSE
Solyc07g006560.3.1	3.61287	0.00357191	0.0212617	Hypersensitive response assisting protein (AHRD V3.3 *** Q9SWC6_CAPAN)	TRUE
Solyc00g500211.1.1	3.61171	0.00327147	0.0198481	NAD(P)H-quinone oxidoreductase subunit 5, chloroplastic (AHRD V3.3 *** J7H711_CAPAN)	FALSE
Solyc10g005010.4.1	3.54421	0.00855925	0.0419835	NAC domain-containing protein (AHRD V3.3 *** A0A2K3MP41_TRIPR)	TRUE
Solyc04g007000.2.1	3.53931	0.000603337	0.00497189	AP2/B3 transcription factor family protein (AHRD V3.3 *** A0A2U1MEM3_ARTAN)	TRUE
Solyc02g088070.3.1	3.53646	0.000227178	0.00217724	Dof zinc finger protein (AHRD V3.3 *** A0A2K3PAB0_TRIPR)	TRUE
Solyc01g108440.2.1	3.52693	0.00250006	0.0159903	Herbivore elicitor-regulated 1 (AHRD V3.3 *** S5ZR43_NICAT)	TRUE
Solyc08g077900.3.1	3.50513	6.77258e-09	2.12424e-07	Expansin-like B1 (AHRD V3.3 *** A0A1U8GH71_CAPAN)	FALSE
Solyc08g067340.4.1	3.4077	8.08741e-06	0.000122524	WRKY transcription factor 46	TRUE
Solyc09g074280.1.1	3.37282	0.00310851	0.019081	Ankyrin repeat-containing protein (AHRD V3.3 *** A0A2U1QG31_ARTAN)	FALSE
Solyc10g050510.1.1	3.32727	0.00492295	0.0274287	Unknown protein	FALSE
Solyc02g071770.3.1	3.30156	0.00260778	0.0165633	oil body-associated protein 2A-like (AHRD V3.3 *** A0A2I4FEE8_9ROSI)	TRUE
Solyc07g064710.3.1	3.29296	0.00578732	0.0311622	Tetraacyldisaccharide 4'-kinase (AHRD V3.3 *** A0A200QBG8_9MAGN)	FALSE
Solyc11g065960.3.1	3.29082	0.0100419	0.0476703	U3 small nucleolar ribonucleoprotein IMP4 (AHRD V3.3 *-* A0A1U8ESL4_CAPAN)	TRUE
Solyc05g055100.2.1	3.2824	0.00325477	0.0197664	Ubiquitin carboxyl-terminal hydrolase 13 (AHRD V3.3 *** A0A2G2X297_CAPBA)	FALSE
Solyc05g009650.4.1	3.2342	8.77738e-16	1.14645e-13	Unknown protein	TRUE
Solyc04g025450.3.1	3.21913	0.00619971	0.0329366	Acetate/butyrate--CoA ligase AAE7, peroxisomal (AHRD V3.3 *-* A0A2G3CKN6_CAPCH)	FALSE
Solyc05g056477.1.1	3.20294	0.000187189	0.00185224	NAC domain-containing protein (AHRD V3.3 *** A0A2K3LLY1_TRIPR)	FALSE
Solyc06g061040.4.1	3.19581	0.00120849	0.00892504	Ribose-phosphate pyrophosphokinase (AHRD V3.3 *** A0A0U9HNH5_KLENI)	FALSE
Solyc01g066270.3.1	3.16432	9.35179e-06	0.000139826	Unknown protein	TRUE
Solyc03g113370.3.1	3.11287	0.0011808	0.00874176	Ubiquitin carboxyl-terminal hydrolase-like protein (AHRD V3.3 *** A0A2K3NQ17_TRIPR)	TRUE
Solyc04g079860.1.1	3.10452	0.00795212	0.0398609	Hexosyltransferase (AHRD V3.3 *** A0A2G2ZRY0_CAPAN)	FALSE
Solyc03g118700.3.1	3.09763	0.00237932	0.0154121	nuclear localized protein (AHRD V3.3 *-* AT1G48580.3)	TRUE
Solyc03g006360.3.1	3.09097	7.00973e-08	1.75668e-06	Auxin-repressed protein (AHRD V3.3 *** A9YSI8_TOBAC)	TRUE
Solyc06g007460.3.1	3.07689	0.00704602	0.0361717	EPIDERMAL PATTERNING FACTOR-like protein 6 (AHRD V3.3 *** A0A2G2WHG3_CAPBA)	FALSE
Solyc01g088260.3.1	2.99258	0.00229275	0.0149832	Germin-like protein subfamily 1 member 20 (AHRD V3.3 *** A0A2G3CSH1_CAPCH)	FALSE
Solyc05g009610.1.1	2.99206	1.05477e-08	3.16709e-07	Alpha/beta-Hydrolases superfamily protein (AHRD V3.3 *** A0A2U1PVQ0_ARTAN)	FALSE
Solyc01g096820.4.1	2.95098	0.0102642	0.0484111	Calcium/calmodulin dependent protein kinase (AHRD V3.3 *** Q9S792_TOBAC)	FALSE
Solyc11g020160.2.1	2.91774	0.00485852	0.0271785	Nuclear pore complex protein NUP88 (AHRD V3.3 *-* A0A2G3B8C8_CAPCH)	TRUE
Solyc11g070150.2.1	2.91747	2.78862e-06	4.71282e-05	Histidine-containing phosphotransfer protein 4 (AHRD V3.3 *** A0A2G2YI23_CAPAN)	FALSE
Solyc03g111100.1.1	2.90637	0.0073356	0.0373571	At3g48510 (AHRD V3.3 *** Q9SMP6_ARATH)	TRUE
Solyc01g067440.4.1	2.88001	0.00669184	0.0348624	Glutaredoxin (AHRD V3.3 *** A0A2G9GSG9_9LAMI)	FALSE
Solyc03g083200.4.1	2.87561	0.000138755	0.00143592	En/Spm-like transposon (AHRD V3.3 *-* AT5G24275.4)	FALSE
Solyc03g120420.3.1	2.87217	3.89282e-12	2.34158e-10	Unknown protein	FALSE
Solyc02g090290.3.1	2.8607	0.00932385	0.0449383	Geraniol 8-hydroxylase (AHRD V3.3 *** A0A2G3D8R4_CAPCH)	FALSE
Solyc01g089890.3.1	2.80243	0.000932754	0.0071575	PRA1 family protein (AHRD V3.3 *** A0A2G3AMA6_CAPAN)	TRUE
Solyc02g081800.1.1	2.76184	0.0033424	0.0202047	HXXXD-type acyl-transferase family protein (AHRD V3.3 *** F4JBC7_ARATH)	FALSE
Solyc03g044350.3.1	2.75888	3.89323e-09	1.29439e-07	Transcription elongation factor (AHRD V3.3 *** A0A200Q6X7_9MAGN)	TRUE
Solyc12g014090.2.1	2.7366	0.00169925	0.0118101	TAF RNA polymerase I subunit A (AHRD V3.3 *** AT1G53200.1)	TRUE
Solyc06g051680.1.1	2.70969	0.00760815	0.0384848	Protein EARLY FLOWERING 4 (AHRD V3.3 *** A0A2G2Z8T4_CAPAN)	TRUE
Solyc09g065940.4.1	2.70293	0.008652	0.0422797	U6 snRNA-associated Sm-like protein LSm4 (AHRD V3.3 *-* A0A328E599_9ASTE)	TRUE
Solyc08g008280.3.1	2.66421	7.80137e-07	1.54389e-05	WRKY transcription factor 53	TRUE
Solyc01g108060.2.1	2.65074	0.00962436	0.046071	Methylcrotonoyl-CoA carboxylase (AHRD V3.3 *-* A0A0B2UFQ9_9GAMM)	FALSE
Solyc03g095310.3.1	2.63803	0.006473	0.0340368	Cytochrome P450 (AHRD V3.3 *** A0A2U1PRC1_ARTAN)	FALSE
Solyc04g009860.4.1	2.58314	5.69668e-17	9.38464e-15	2-oxoglutarate (2OG) and Fe(II)-dependent oxygenase superfamily protein (AHRD V3.3 *** A0A2U1QA13_ARTAN)	FALSE
Solyc05g050340.4.1	2.57486	0.00372852	0.022029	WRKY transcription factor 58	TRUE
Solyc09g011040.1.1	2.57423	0.00935471	0.0450396	Aspartic proteinase PCS1 (AHRD V3.3 *** A0A2G2YR66_CAPAN)	FALSE
Solyc04g079760.4.1	2.56924	1.1739e-08	3.51324e-07	UPF0114 domain-containing protein (AHRD V3.3 *** A0A1Q3D8A0_CEPFO)	FALSE
Solyc02g089630.3.1	2.54536	6.75465e-12	3.90872e-10	Proline dehydrogenase (AHRD V3.3 *** A0A2G2XIU2_CAPBA)	FALSE
Solyc03g117860.3.1	2.5402	4.83425e-12	2.83331e-10	RBR-type E3 ubiquitin transferase (AHRD V3.3 *** A0A2G3A2R7_CAPAN)	FALSE
Solyc04g077650.3.1	2.53902	0.00014669	0.0015095	Serine carboxypeptidase-like 17 (AHRD V3.3 *** A0A2G2ZRB2_CAPAN)	FALSE
Solyc01g079320.4.1	2.5323	7.33339e-05	0.000825221	Pentatricopeptide repeat (AHRD V3.3 *** A0A200PWD1_9MAGN)	FALSE
Solyc09g010740.4.1	2.52464	0.00217905	0.0144143	Peptidylprolyl isomerase (AHRD V3.3 *-* A0A2G2YNK8_CAPAN)	TRUE
Solyc12g088140.2.1	2.52147	0.00319097	0.0194695	Hydroxyproline-rich glycoprotein (AHRD V3.3 *** A0A2K3L507_TRIPR)	FALSE
Solyc09g015770.3.1	2.51127	1.12761e-19	3.81843e-17	WRKY transcription factor 81	TRUE
Solyc07g066330.3.1	2.49855	4.98695e-06	7.86811e-05	NAC domain-containing protein (AHRD V3.3 *** A0A2G2WGF8_CAPBA)	TRUE
Solyc03g007230.4.1	2.49053	9.81441e-12	5.54428e-10	Protein phosphatase 2C (AHRD V3.3 *** A0A2U1KYU0_ARTAN)	TRUE
Solyc06g068130.3.1	2.47982	3.88492e-10	1.59265e-08	Tetratricopeptide repeat (TPR)-like superfamily protein (AHRD V3.3 *-* F4K464_ARATH)	TRUE
Solyc03g119320.1.1	2.4787	5.58081e-09	1.79036e-07	hypothetical protein (AHRD V3.3 *** AT1G48780.1)	TRUE
Solyc10g080670.2.1	2.443	1.55526e-20	6.77129e-18	Transmembrane protein, putative (AHRD V3.3 *** A2Q5V9_MEDTR)	TRUE
Solyc09g010160.3.1	2.42993	9.30999e-06	0.000139429	NAC domain-containing protein 90 (AHRD V3.3 *** A0A2G2YPI7_CAPAN)	TRUE
Solyc05g052030.1.1	2.40996	5.89219e-10	2.34227e-08	ethylene response factor 4	TRUE
Solyc03g119310.3.1	2.40908	1.02821e-15	1.31482e-13	Unknown protein	TRUE
Solyc10g085610.2.1	2.4061	0.00454193	0.0257931	Calmodulin-binding family protein, putative, expressed (AHRD V3.3 *** Q2QXN6_ORYSJ)	TRUE
Solyc09g064820.1.1	2.3893	1.39635e-05	0.000197323	EID1-like F-box protein 3 (AHRD V3.3 *** A0A2G3BFQ9_CAPCH)	TRUE
Solyc12g088310.3.1	2.38915	0.00959688	0.0459876	Unknown protein	TRUE
Solyc04g081020.3.1	2.38835	9.21108e-05	0.00100199	B-box zinc finger protein 24 (AHRD V3.3 *** A0A2G3CQV9_CAPCH)	TRUE
Solyc07g056190.3.1	2.38089	3.2518e-12	1.98871e-10	Heavy metal-associated isoprenylated plant protein (AHRD V3.3 *** A0A2R6QEC1_ACTCH)	FALSE
Solyc12g027870.1.1	2.36984	0.000872982	0.006767	Protein kinase domain (AHRD V3.3 *** A0A200Q8W1_9MAGN)	FALSE
Solyc05g007770.3.1	2.34204	8.99638e-06	0.000135175	NAC domain TF	TRUE
Solyc01g086670.3.1	2.33087	1.25571e-11	6.85428e-10	Unknown protein	FALSE
Solyc10g083940.1.1	2.32256	0.00914001	0.0443092	Major facilitator superfamily (AHRD V3.3 *** A0A2U1KPS1_ARTAN)	FALSE
Solyc08g006470.4.1	2.31376	1.65308e-12	1.06437e-10	Zinc finger protein (AHRD V3.3 *** A0A2U1NTB4_ARTAN)	TRUE
Solyc12g098900.2.1	2.31005	0.00431272	0.0247522	Late embryogenesis abundant protein D-29 (AHRD V3.3 *-* A0A2G3B563_CAPCH)	TRUE
Solyc12g096960.2.1	2.30093	0.00188076	0.012804	Major allergen Pru ar 1 (AHRD V3.3 *** Q5GMN2_CAPCH)	FALSE
Solyc01g100200.3.1	2.29064	1.44825e-11	7.81203e-10	gras4	TRUE
Solyc05g010060.4.1	2.28567	0.00807615	0.040229	Phosphate transporter PHO1-3 (AHRD V3.3 *** A0A2G3B6L2_CAPCH)	TRUE
Solyc12g049210.1.1	2.23886	0.000142029	0.00146649	DUF3511 domain-containing protein (AHRD V3.3 *** A0A1Q3CXE7_CEPFO)	TRUE
Solyc10g080610.1.1	2.22447	1.6857e-18	4.1655e-16	F-box/kelch-repeat protein At1g15670-like (AHRD V3.3 *** A0A2I4E0A4_9ROSI)	FALSE
Solyc04g049920.4.1	2.21155	0.0100829	0.0478153	RNA-binding (RRM/RBD/RNP motifs) family protein (AHRD V3.3 *** A0A2U1QNE1_ARTAN)	TRUE
Solyc12g042890.2.1	2.18938	0.00101724	0.00771197	Alpha/beta-Hydrolases superfamily protein (AHRD V3.3 *** A0A2U1Q9V2_ARTAN)	FALSE
Solyc05g005910.4.1	2.18507	1.00254e-12	6.73985e-11	Protein NRT1/ PTR FAMILY 1.2 (AHRD V3.3 *-* A0A1J3FWJ0_NOCCA)	FALSE
Solyc01g150126.1.1	2.18465	2.03396e-08	5.76635e-07	Calcium-binding EF-hand (AHRD V3.3 *-* A0A2U1P7H3_ARTAN)	FALSE
Solyc07g042130.4.1	2.1764	0.00074555	0.00594036	Pentatricopeptide repeat (AHRD V3.3 *** A0A200QMK2_9MAGN)	FALSE
Solyc10g007280.4.1	2.171	1.96276e-08	5.63438e-07	P-loop containing nucleoside triphosphate hydrolases superfamily protein (AHRD V3.3 *** A0A2U1NGY3_ARTAN)	TRUE
Solyc08g068850.3.1	2.16281	4.82279e-07	1.01135e-05	proton pump-interactor 1-like (AHRD V3.3 *-* A0A2I4H3B3_9ROSI)	FALSE
Solyc12g015780.2.1	2.15702	0.00938194	0.045135	DNA-directed RNA polymerase (AHRD V3.3 *** A0A200Q9V0_9MAGN)	TRUE
Solyc11g011240.1.1	2.15683	0.00696649	0.0359643	geranylgeranyl pyrophosphate synthase 1	TRUE
Solyc07g045030.4.1	2.14675	0.00262527	0.0166397	NAC domain-containing protein (AHRD V3.3 *** A0A2K3NPJ8_TRIPR)	FALSE
Solyc03g033840.4.1	2.14588	1.28029e-13	1.04984e-11	AAA-ATPase At3g50940-like (AHRD V3.3 *** A0A2I4EX93_9ROSI)	FALSE
Solyc04g005610.3.1	2.13369	2.65281e-09	9.25751e-08	NAC domain-containing protein 2 (AHRD V3.3 *** NAP2_SOLLC)	TRUE
Solyc02g077880.3.1	2.13368	4.83145e-12	2.83331e-10	Auxin-repressed protein (AHRD V3.3 *** A9YSI8_TOBAC)	TRUE
Solyc10g075103.1.1	2.13258	0.000714907	0.00573368	Non-specific lipid-transfer protein (AHRD V3.3 *** K4D1V1_SOLLC)	FALSE
Solyc01g080910.2.1	2.13105	1.31352e-06	2.44095e-05	polyadenylate-binding protein 1-B-binding protein (AHRD V3.3 *** AT5G44860.2)	FALSE
Solyc02g062960.4.1	2.10765	5.25124e-05	0.000617122	Homeobox-leucine zipper protein HOX14 (AHRD V3.3 *** A0A1U8FQP7_CAPAN)	TRUE
Solyc02g079290.3.1	2.10436	1.38837e-06	2.5541e-05	FLOWERING LOCUS T/ TERMINAL FLOWER 1-like protein (AHRD V3.3 *** Q6L5N9_POPNI)	TRUE
Solyc04g014400.4.1	2.10235	1.65694e-06	2.97923e-05	LOW QUALITY PROTEIN: LRR receptor-like serine/threonine-protein kinase GSO1 (AHRD V3.3 *** A0A1U8F7A0_CAPAN)	FALSE
Solyc01g107090.2.1	2.08806	2.58294e-14	2.42214e-12	beta-1%2C4-xylosidase (AHRD V3.3 *** AT3G19615.1)	TRUE
Solyc10g076180.1.1	2.07883	2.6143e-05	0.000337846	ovate family protein 20	TRUE
Solyc02g061990.3.1	2.07747	0.00224512	0.0147306	BZIP transcription factor FD (AHRD V3.3 *** A0A2U1NCD2_ARTAN)	TRUE
Solyc01g060090.1.1	2.07319	0.000559507	0.00467176	serine/threonine-protein phosphatase 4 regulatory subunit 3-like (AHRD V3.3 *-* A0A2I4F1X2_9ROSI)	FALSE
Solyc04g007980.3.1	2.07053	3.27266e-16	4.63906e-14	2-oxoglutarate (2OG) and Fe(II)-dependent oxygenase superfamily protein (AHRD V3.3 *** O80850_ARATH)	TRUE
Solyc08g068690.1.1	2.06961	1.81781e-11	9.7766e-10	Tyramine n-hydroxycinnamoyl transferase (AHRD V3.3 *** Q5D8C0_CAPAN)	FALSE
Solyc05g009490.3.1	2.06571	0.00221459	0.0145827	Unknown protein	FALSE
Solyc03g116390.4.1	2.06334	0.00663293	0.0346246	Late embryogenesis abundant protein Dc3 (AHRD V3.3 *** A0A1U8FUJ0_CAPAN)	TRUE
Solyc04g009440.3.1	2.0632	9.04838e-11	4.21014e-09	NAC domain protein AY498713	TRUE
Solyc05g018750.4.1	2.03746	0.00391937	0.0228976	GBF-interacting protein 1-like isoform X1 (AHRD V3.3 *** A0A2I4FNM4_9ROSI)	TRUE
Solyc11g012600.3.1	2.03733	0.000752152	0.00598382	Ribosome associated membrane protein RAMP4 (AHRD V3.3 -** AT1G27350.1)	FALSE
Solyc01g097320.3.1	2.03003	7.29935e-05	0.000821896	Mediator of RNA polymerase II transcription subunit 14 (AHRD V3.3 *** A0A2G2W775_CAPBA)	TRUE
Solyc04g006970.4.1	2.02882	2.89047e-07	6.43789e-06	Phosphoenolpyruvate carboxylase (AHRD V3.3 *** A6YM33_RICCO)	TRUE
Solyc01g108560.4.1	2.02775	0.00674202	0.035034	Alpha/beta-Hydrolases superfamily protein (AHRD V3.3 *** A0A2U1KC75_ARTAN)	FALSE
Solyc01g044350.3.1	2.0175	5.79354e-08	1.49634e-06	RBR-type E3 ubiquitin transferase (AHRD V3.3 *** A0A2G2XPJ0_CAPBA)	TRUE
Solyc01g081310.3.1	2.01359	7.21271e-09	2.24688e-07	glutathione S-transferase T3	FALSE
Solyc04g005380.3.1	2.01132	3.17826e-05	0.000399434	Ninja-family protein AFP3 (AHRD V3.3 *** A0A2G3CFM6_CAPCH)	TRUE
Solyc09g018060.4.1	1.98057	0.00551793	0.03003	MAP kinase kinase kinase 69	TRUE
Solyc12g006530.2.1	1.96801	8.48687e-07	1.65625e-05	Terpene cyclase/mutase family member (AHRD V3.3 *** A0A2G3BN05_CAPCH)	FALSE
Solyc01g096510.2.1	1.96723	0.000137216	0.00142321	Sigma factor binding protein 1, chloroplastic (AHRD V3.3 *** A0A2G2W6X7_CAPBA)	TRUE
Solyc11g065940.2.1	1.96244	3.03606e-05	0.000383143	ENTH/VHS-like protein (AHRD V3.3 *** A0A2U1LWI0_ARTAN)	TRUE
Solyc04g040180.3.1	1.96007	6.87747e-09	2.15345e-07	S-adenosyl-L-methionine-dependent methyltransferases superfamily protein (AHRD V3.3 *** A0A1Y1ICE6_KLENI)	FALSE
Solyc03g123460.4.1	1.95819	9.41023e-06	0.000140355	DUF581 domain-containing protein (AHRD V3.3 *** A0A1Q3D286_CEPFO)	FALSE
Solyc03g115070.1.1	1.95673	0.00857987	0.0420395	Exocyst subunit Exo70 family protein (AHRD V3.3 *** A0A1U8FWZ7_CAPAN)	FALSE
Solyc03g006710.1.1	1.95129	0.0089183	0.0433724	Calcium-binding protein PBP1 (AHRD V3.3 *** A0A1U8F7L1_CAPAN)	FALSE
Solyc01g066260.2.1	1.93263	0.00217624	0.0144027	Unknown protein	TRUE
Solyc01g088590.5.1	1.93237	0.00642377	0.0338991	Pectinesterase inhibitor (AHRD V3.3 *** A0A2U1KTC1_ARTAN)	FALSE
Solyc12g039180.2.1	1.92573	0.000269899	0.0025219	Diacylglycerol kinase (AHRD V3.3 *** A0A1U8G5K6_CAPAN)	TRUE
Solyc01g111610.3.1	1.92047	0.001069	0.0080576	SBP (S-ribonuclease binding protein) family protein (AHRD V3.3 *** A0A2U1N6W4_ARTAN)	FALSE
Solyc09g007340.4.1	1.91082	0.0105625	0.0495626	Tudor/PWWP/MBT superfamily protein (AHRD V3.3 *-* Q9LYZ0_ARATH)	TRUE
Solyc06g069150.1.1	1.88871	0.00267332	0.0168741	hypothetical protein (AHRD V3.3 *** AT1G13360.1)	TRUE
Solyc07g008210.4.1	1.8873	3.45045e-08	9.33358e-07	Tetratricopeptide repeat (TPR)-like superfamily protein (AHRD V3.3 *-* F4K464_ARATH)	TRUE
Solyc05g052610.3.1	1.8866	8.29231e-07	1.62174e-05	Transcription factor DIVARICATA (AHRD V3.3 *** A0A1U8GX57_CAPAN)	TRUE
Solyc12g008650.2.1	1.88331	0.00244794	0.015745	Inositol oxygenase (AHRD V3.3 *** A0A200QVH1_9MAGN)	FALSE
Solyc11g007190.2.1	1.88002	0.000344365	0.0030959	Unknown protein	FALSE
Solyc01g099810.3.1	1.87165	5.5813e-05	0.000649648	Serine/arginine-rich-splicing factor SR34 (AHRD V3.3 *-* A0A0M9UMW1_NICAT)	TRUE
Solyc04g077370.2.1	1.86994	0.0104427	0.0490889	G-type lectin S-receptor-like serine/threonine-protein kinase (AHRD V3.3 *** A0A2G3CPH9_CAPCH)	FALSE
Solyc02g083000.1.1	1.86447	5.89385e-08	1.51796e-06	DUF241 domain-containing protein (AHRD V3.3 *** A0A1Q3CEB1_CEPFO)	TRUE
Solyc02g064990.3.1	1.86267	0.00195329	0.0131946	Remorin (AHRD V3.3 *** A0A200QZA9_9MAGN)	TRUE
Solyc04g079230.4.1	1.85922	5.36964e-06	8.42104e-05	Patatin (AHRD V3.3 *-* A0A2G2X0P8_CAPBA)	FALSE
Solyc04g081900.4.1	1.85743	5.54132e-09	1.78082e-07	Thioredoxin_8 domain-containing protein (AHRD V3.3 *** A0A1Q3C5I0_CEPFO)	TRUE
Solyc11g069700.2.1	1.85428	2.88071e-10	1.1972e-08	Elongation factor 1-alpha (AHRD V3.3 *** A0A1U8EL12_CAPAN)	TRUE
Solyc04g080820.2.1	1.85332	0.00625321	0.0331726	cytokinin oxidase4	FALSE
Solyc08g083130.4.1	1.84931	0.000392588	0.00345138	Homeobox-leucine zipper protein HOX6 (AHRD V3.3 *** A0A2G3DAJ5_CAPCH)	TRUE
Solyc09g008050.3.1	1.84678	2.01042e-06	3.52469e-05	Glycosyltransferase (AHRD V3.3 *** A0A1Q3DDP0_CEPFO)	FALSE
Solyc07g045530.2.1	1.84628	5.66381e-08	1.46905e-06	cilia- and flagella-associated protein 251-like (AHRD V3.3 --* XP_015870144.1)	FALSE
Solyc11g006785.1.1	1.84307	0.00658726	0.034455	Unknown protein	TRUE
Solyc10g009360.4.1	1.8429	0.0092473	0.0446754	Dof zinc finger protein (AHRD V3.3 *** A0A2K3M0E2_TRIPR)	TRUE
Solyc04g079940.3.1	1.84266	2.68575e-12	1.65917e-10	NAC domain-containing protein (AHRD V3.3 *** A0A2U1N781_ARTAN)	TRUE
Solyc03g114710.4.1	1.83538	8.16833e-06	0.000123545	Glycosyltransferase (AHRD V3.3 *** A0A328DB01_9ASTE)	TRUE
Solyc02g091380.1.1	1.82565	8.02008e-07	1.58204e-05	transmembrane protein (AHRD V3.3 *** AT1G49000.1)	FALSE
Solyc09g005660.4.1	1.82276	0.00476147	0.0267675	HAT transposon superfamily protein (AHRD V3.3 *** Q9LDK4_ARATH)	TRUE
Solyc04g051690.4.1	1.80762	6.55483e-07	1.32974e-05	WRKY transcription factor 51	TRUE
Solyc11g012130.2.1	1.80696	1.94631e-09	6.92417e-08	Early nodulin-like protein 2-like (AHRD V3.3 *** A0A2K3MQQ9_TRIPR)	FALSE
Solyc09g065390.1.1	1.80461	2.48122e-05	0.00032316	DUF581 domain-containing protein (AHRD V3.3 *** A0A1Q3D4G2_CEPFO)	TRUE
Solyc08g079430.3.1	1.80292	6.19645e-07	1.2646e-05	partialcopper-containing amine oxidase	FALSE
Solyc06g053730.1.1	1.80025	0.000173685	0.00173742	Serine/threonine-protein kinase BLUS1 (AHRD V3.3 *** A0A2G3C6N8_CAPCH)	TRUE
Solyc04g015690.4.1	1.79443	1.37911e-05	0.000195492	Insulinase (Peptidase family M16) family protein (AHRD V3.3 *** A0A2U1LWG8_ARTAN)	FALSE
Solyc04g079050.3.1	1.79031	2.52237e-06	4.31066e-05	UDP-glycosyltransferase 79B2 (AHRD V3.3 *** A0A2G3CJJ2_CAPCH)	FALSE
Solyc07g049530.3.1	1.78621	7.15084e-10	2.77623e-08	1-aminocyclopropane-1-carboxylate oxidase 1	FALSE
Solyc09g082230.1.1	1.77893	6.91953e-11	3.31462e-09	N-acetyltransferase (AHRD V3.3 *** A0A2N9Z4V7_PAEPO)	FALSE
Solyc09g092480.1.1	1.77679	2.08479e-14	1.99594e-12	Glycosyltransferase (AHRD V3.3 *** A0A2I4GJH4_9ROSI)	FALSE
Solyc06g066420.4.1	1.76689	0.000614357	0.00503715	Oxidative stress 3 (AHRD V3.3 *-* A0A2K3PRT1_TRIPR)	TRUE
Solyc01g096320.3.1	1.76601	1.92193e-06	3.3956e-05	Homeobox-leucine zipper protein HOX6 (AHRD V3.3 *** A0A1U8DTA9_CAPAN)	FALSE
Solyc01g005700.3.1	1.76036	0.000112831	0.00119746	Transposase, MuDR, MULE transposase domain protein (AHRD V3.3 *** A0A2U1N7R9_ARTAN)	TRUE
Solyc07g056200.3.1	1.75745	1.98675e-08	5.66765e-07	Heavy metal-associated isoprenylated plant protein (AHRD V3.3 *** A0A2R6QEC1_ACTCH)	TRUE
Solyc01g112230.4.1	1.75321	0.00602685	0.0321772	Plant EC metallothionein-like protein (AHRD V3.3 *** A0A200PQZ1_9MAGN)	FALSE
Solyc02g081360.4.1	1.75277	0.00961189	0.0460461	AMP-dependent synthetase/ligase (AHRD V3.3 *** A0A200PYF6_9MAGN)	FALSE
Solyc03g096250.3.1	1.75143	0.000267385	0.00250225	Protein yippee-like (AHRD V3.3 *** A0A1U8GAE4_CAPAN)	FALSE
Solyc08g016415.1.1	1.74822	0.000120667	0.00126884	hypothetical protein (AHRD V3.3 *** AT2G38465.1)	TRUE
Solyc01g109790.3.1	1.74675	3.04242e-13	2.29892e-11	ADP-glucose pyrophosphorylase large subunit 1	FALSE
Solyc00g021630.1.1	1.73927	3.98121e-07	8.48489e-06	NADH-ubiquinone oxidoreductase chain 6 (AHRD V3.3 *** A0A0C5B7I5_9SOLA)	TRUE
Solyc01g086660.2.1	1.73674	4.42352e-07	9.35126e-06	Unknown protein	FALSE
Solyc06g062430.3.1	1.7336	1.95216e-06	3.44235e-05	Inositol oxygenase (AHRD V3.3 *** A0A2U1PDJ1_ARTAN)	FALSE
Solyc01g099220.3.1	1.73326	0.00138399	0.0100268	DNA polymerase (AHRD V3.3 *** A0A2G3AW20_CAPCH)	TRUE
Solyc08g076870.1.1	1.72742	0.00254225	0.0162091	DUF740 domain-containing protein (AHRD V3.3 *** A0A1Q3BKH7_CEPFO)	TRUE
Solyc06g053550.3.1	1.71501	0.00193194	0.0130891	Peroxisomal membrane protein PMP22 (AHRD V3.3 *** A0A1U8F4P8_CAPAN)	FALSE
Solyc04g054500.3.1	1.70223	2.94589e-11	1.52603e-09	Heavy metal-associated isoprenylated plant protein (AHRD V3.3 *** A0A2R6R672_ACTCH)	FALSE
Solyc09g091860.4.1	1.70043	0.0095833	0.0459345	Poly(A) RNA polymerase GLD2 (AHRD V3.3 *-* A0A2I0VGJ9_9ASPA)	TRUE
Solyc12g010720.1.1	1.69559	0.000987518	0.00752093	Protein EPIDERMAL PATTERNING FACTOR 1 (AHRD V3.3 *** A0A2G2YTN2_CAPAN),Pfam:PF17181	FALSE
Solyc04g049680.2.1	1.69263	2.78051e-05	0.000354563	Pseudo-response regulator (AHRD V3.3 *-* X5I0R0_IPONI)	TRUE
Solyc01g079140.2.1	1.68584	0.000150326	0.00154257	Unknown protein	TRUE
Solyc08g080090.3.1	1.67508	1.42333e-13	1.15164e-11	green flesh	TRUE
Solyc08g006010.3.1	1.67262	0.00179953	0.0123568	WD-40 repeat containing protein (AHRD V3.3 *** A0A0K0XR07_TOBAC)	TRUE
Solyc05g053500.4.1	1.6715	2.94767e-24	2.34353e-21	GATA transcription factor (AHRD V3.3 *** G7K6G0_MEDTR)	TRUE
Solyc04g077620.1.1	1.67007	6.74607e-06	0.000103576	Uncharacterized conserved protein UCP031279 (AHRD V3.3 -** AT1G10140.1)	TRUE
Solyc02g084840.3.1	1.66883	7.78305e-11	3.67754e-09	Dehydrin (AHRD V3.3 *** A0A2R4KWH2_9SOLN)	TRUE
Solyc09g014860.3.1	1.66292	1.15584e-05	0.00016761	Protein LURP-one-related 15 (AHRD V3.3 *** A0A2G2ZQX5_CAPAN)	FALSE
Solyc02g062140.2.1	1.65782	0.000765063	0.00607466	Armadillo repeat only 1 (AHRD V3.3 *** Q9SW41_ARATH)	TRUE
Solyc03g118810.1.1	1.65664	7.56043e-10	2.91667e-08	Calcium-binding allergen Ole e 8 (AHRD V3.3 *** A0A2G2WQF6_CAPBA)	TRUE
Solyc02g088180.3.1	1.65249	1.06668e-06	2.02757e-05	NAC domain-containing protein (AHRD V3.3 *** A0A2G2V9A8_CAPBA)	TRUE
Solyc03g118290.3.1	1.64908	2.63749e-06	4.4781e-05	auxin response factor 2A	TRUE
Solyc06g069350.3.1	1.64812	0.00194491	0.0131574	Unknown protein	TRUE
Solyc09g005610.4.1	1.63895	0.00193363	0.0130908	Transcription factor (AHRD V3.3 *** A0A2U1LZI0_ARTAN)	TRUE
Solyc12g006280.3.1	1.63841	0.000133972	0.00139194	Homeodomain-like protein (AHRD V3.3 *-* A0A2U1MEU4_ARTAN)	TRUE
Solyc09g014450.4.1	1.63348	8.74308e-09	2.6646e-07	Clathrin light chain (AHRD V3.3 *** A0A2G3BKE5_CAPCH)	TRUE
Solyc03g121090.4.1	1.62852	5.4305e-18	1.1414e-15	BnaC02g12160D protein (AHRD V3.3 *-* A0A078HTB1_BRANA)	FALSE
Solyc04g079030.2.1	1.62818	0.00935242	0.0450396	Glycosyltransferase (AHRD V3.3 *** V4NB36_EUTSA)	FALSE
Solyc09g075090.1.1	1.62629	0.0026939	0.0169864	Serine/arginine-rich-splicing factor SR34 (AHRD V3.3 *** A0A0M8KT32_NICAT)	TRUE
Solyc02g069510.1.1	1.62529	0.00102252	0.00774878	Protein LIGHT-DEPENDENT SHORT HYPOCOTYLS 6 (AHRD V3.3 *** A0A2G3D431_CAPCH)	TRUE
Solyc08g021795.1.1	1.615	0.00207039	0.0138021	Unknown protein	TRUE
Solyc06g076130.3.1	1.61207	0.000530003	0.00446208	GTP-binding Obg/CgtA protein (AHRD V3.3 *-* A0A2K3MSE1_TRIPR)	TRUE
Solyc01g104900.3.1	1.61154	2.1186e-05	0.000281769	NAC domain-containing protein (AHRD V3.3 *** A0A2U1K9C2_ARTAN)	TRUE
Solyc03g083400.3.1	1.61143	6.34645e-10	2.49572e-08	CCT motif protein (AHRD V3.3 *** A0A2K3PQC2_TRIPR)	TRUE
Solyc09g091560.3.1	1.60619	6.23104e-05	0.000717512	Ankyrin repeat-containing protein (AHRD V3.3 *** A0A2U1PSX4_ARTAN)	TRUE
Solyc01g095630.3.1	1.60443	6.49554e-09	2.05142e-07	WRKY transcription factor 41	FALSE
Solyc06g069360.3.1	1.60404	0.00022683	0.00217505	PHD and RING finger domain-containing protein (AHRD V3.3 *-* A0A2K3N8F5_TRIPR)	TRUE
Solyc08g077500.4.1	1.60252	0.00140032	0.010133	Pleckstrin homology domain (AHRD V3.3 *** A0A200QQL4_9MAGN)	TRUE
Solyc02g032850.3.1	1.59695	3.285e-11	1.68735e-09	Phytoalexin-deficient 4-1 protein (AHRD V3.3 *** Q2TNK3_SOLTU)	FALSE
Solyc12g087990.3.1	1.59323	0.00416269	0.0240654	hydroxyproline-rich glycoprotein family protein (AHRD V3.3 *-* AT4G24500.3)	TRUE
Solyc12g096870.1.1	1.59215	9.09766e-06	0.000136584	Glycosyltransferase (AHRD V3.3 *** A0A193AUF6_PUNGR)	FALSE
Solyc04g082960.1.1	1.58818	0.00390177	0.0228167	Poly polymerase (AHRD V3.3 *** Q9C9J8_ARATH)	FALSE
Solyc03g112920.1.1	1.58543	0.00257648	0.0163987	protein SHOOT GRAVITROPISM 5-like (AHRD V3.3 *** A0A2I4F066_9ROSI)	TRUE
Solyc01g066290.2.1	1.5823	7.31921e-06	0.000111812	Unknown protein	TRUE
Solyc04g008950.4.1	1.57947	0.00252931	0.0161378	GRAM domain-containing protein (AHRD V3.3 *** A0A1Q3B313_CEPFO)	FALSE
Solyc05g009550.3.1	1.57841	0.000229828	0.00219803	Regulator of Vps4 activity in the MVB pathway protein (AHRD V3.3 *-* Q9FX63_ARATH)	TRUE
Solyc04g009980.4.1	1.57089	0.000565161	0.00470599	Protein LIGHT-DEPENDENT SHORT HYPOCOTYLS 6 (AHRD V3.3 *** A0A2G3CE82_CAPCH)	TRUE
Solyc03g120260.4.1	1.56987	0.000640017	0.00520843	Coatomer subunit beta' (AHRD V3.3 *-* A0A1Q3BXD5_CEPFO)	FALSE
Solyc03g031980.4.1	1.56917	0.00352694	0.0210833	Lectin-receptor kinase (AHRD V3.3 *** A0A2U1KV35_ARTAN)	FALSE
Solyc08g083110.4.1	1.55167	7.81969e-07	1.54585e-05	Methionine gamma-lyase (AHRD V3.3 *** A0A1U8G8Y5_CAPAN)	TRUE
Solyc08g063035.1.1	1.54907	0.00442466	0.0252842	DDT domain-containing protein DDB_G0282237 (AHRD V3.3 --* XP_010321301.1)	FALSE
Solyc08g079770.3.1	1.54416	3.255e-06	5.41159e-05	Guard cell S-type anion channel SLAC1 (AHRD V3.3 *** A0A2G2XKK1_CAPBA)	TRUE
Solyc04g006960.3.1	1.54303	0.00199065	0.0133975	ABC transporter-like (AHRD V3.3 *** A0A200QID3_9MAGN)	TRUE
Solyc10g080980.2.1	1.53735	0.00024492	0.00232173	WAT1-related protein (AHRD V3.3 *** K4D2Y5_SOLLC)	FALSE
Solyc06g009770.1.1	1.53629	0.000141191	0.00145865	hypothetical protein (AHRD V3.3 *** AT3G62650.2)	FALSE
Solyc06g008330.2.1	1.53561	0.00826993	0.0409919	Serine/threonine-protein kinase (AHRD V3.3 *** A0A2I0WHR6_9ASPA)	TRUE
Solyc08g066770.3.1	1.53371	8.96081e-10	3.42798e-08	Ankyrin repeat (AHRD V3.3 *** A0A200QDM7_9MAGN)	TRUE
Solyc02g076800.1.1	1.52967	9.75807e-05	0.00105557	Phosphatidylinositol 4-phosphate 5-kinase MSS4-like protein (AHRD V3.3 *** A0A2P5EP15_TREOI)	TRUE
Solyc10g055760.2.1	1.52929	1.61229e-10	7.03637e-09	NAC domain-containing protein 2 (AHRD V3.3 *** A0A1U8EDX1_CAPAN)	TRUE
Solyc12g027760.1.1	1.52658	0.00152918	0.0108804	Unknown protein	FALSE
Solyc11g068620.2.1	1.52396	9.88429e-09	2.98751e-07	NAC domain (AHRD V3.3 *** A0A200Q6H1_9MAGN)	FALSE
Solyc01g009860.3.1	1.51432	1.427e-12	9.26643e-11	NAC domain-containing protein (AHRD V3.3 *** A0A2K3LZ45_TRIPR)	TRUE
Solyc05g056480.3.1	1.51327	2.68292e-09	9.34474e-08	2-oxoisovalerate dehydrogenase subunit alpha 2, mitochondrial (AHRD V3.3 *** A0A2G2Y480_CAPAN)	TRUE
Solyc10g008400.1.1	1.5076	6.14752e-05	0.000709233	E3 ubiquitin-protein ligase RMA1H1 (AHRD V3.3 *** A0A2G3BCU0_CAPCH)	TRUE
Solyc02g063440.3.1	1.50435	7.38633e-10	2.85553e-08	Unknown protein	FALSE
Solyc05g005260.3.1	1.50431	4.76731e-10	1.92865e-08	DNA ligase 1-like (AHRD V3.3 *** A0A1U7VHC8_NICSY)	TRUE
Solyc01g097510.4.1	1.50421	6.93263e-07	1.39155e-05	annexin 3	FALSE
Solyc12g087950.1.1	1.5004	2.40844e-07	5.43043e-06	AT-hook motif nuclear-localized protein (AHRD V3.3 *** A0A1U8GD78_CAPAN)	TRUE
Solyc10g078590.2.1	1.49337	4.42378e-09	1.46281e-07	Jacalin-related lectin 3 (AHRD V3.3 *-* A0A2G3BI13_CAPCH)	TRUE
Solyc09g061715.1.1	1.49204	5.88722e-05	0.000680922	hypothetical protein (AHRD V3.3 *-* AT3G24750.1)	TRUE
Solyc02g071360.4.1	1.49062	0.000200727	0.00196283	2-oxoglutarate (2OG) and Fe(II)-dependent oxygenase superfamily protein (AHRD V3.3 *** F4I629_ARATH)	FALSE
Solyc03g112700.1.1	1.49057	0.00163167	0.0114405	Herbivore elicitor-regulated 1 (AHRD V3.3 *** S5ZR43_NICAT)	TRUE
Solyc03g111390.4.1	1.49013	0.000219246	0.0021175	kelch domain-containing protein 4 (AHRD V3.3 *** A0A2I4DLP8_9ROSI)	TRUE
Solyc07g007250.4.1	1.48992	0.000283652	0.00262361	Metallocarboxypeptidase inhibitor (AHRD V3.3 *** A0A2G3BXM1_CAPCH)	FALSE
Solyc05g013320.1.1	1.48561	0.000630461	0.0051444	Protein kinase (AHRD V3.3 *** Q40234_SOLPI)	FALSE
Solyc10g081980.2.1	1.48435	1.12165e-05	0.00016317	Late embryogenesis abundant (LEA) hydroxyproline-rich glycoprotein family (AHRD V3.3 *** A0A2U1KP17_ARTAN)	FALSE
Solyc09g011270.4.1	1.48157	0.0024311	0.0156477	Cysteine/histidine-rich C1 domain protein (AHRD V3.3 *** A0A1P8AY95_ARATH)	FALSE
Solyc01g105820.3.1	1.48133	0.00013293	0.00138347	Unknown protein	TRUE
Solyc12g021310.3.1	1.47879	4.186e-08	1.12401e-06	WD repeat-containing protein 91 homolog (AHRD V3.3 *-* A0A2I4GTW6_9ROSI)	FALSE
Solyc07g005140.4.1	1.47742	0.000171756	0.00171906	Two-component response regulator (AHRD V3.3 *** A0A2G2Z087_CAPAN)	TRUE
Solyc09g010000.4.1	1.47295	0.00754823	0.0382632	2-oxoglutarate (2OG) and Fe(II)-dependent oxygenase superfamily protein (AHRD V3.3 *** A0A2U1NTU8_ARTAN)	FALSE
Solyc04g081700.3.1	1.47	0.00222607	0.0146424	Unknown protein	FALSE
Solyc03g117330.4.1	1.46496	0.00187796	0.0127945	Proline-tRNA ligase (AHRD V3.3 *** X8JBM9_9HOMO)	TRUE
Solyc07g042380.4.1	1.46278	2.78686e-05	0.000355126	RRP12-like protein (AHRD V3.3 *** A0A2I4DID3_9ROSI)	TRUE
Solyc02g083220.2.1	1.46259	7.84802e-05	0.000870806	DNA-directed RNA polymerase subunit (AHRD V3.3 *-* A0A1U8FXJ4_CAPAN)	TRUE
Solyc03g115930.3.1	1.46242	7.94614e-05	0.000879027	Calcium-binding EF-hand family protein (AHRD V3.3 *-* A0A2U1NCV0_ARTAN)	FALSE
Solyc05g007240.1.1	1.46159	2.83683e-09	9.82469e-08	zinc finger CCHC domain protein (AHRD V3.3 *** AT1G26920.1)	TRUE
Solyc11g012810.2.1	1.45648	0.00248114	0.0159063	protein ANTI-SILENCING 1-like (AHRD V3.3 *** A0A2I4DFE9_9ROSI)	TRUE
Solyc06g065440.1.1	1.45545	0.000192516	0.00189842	Zinc finger protein STOP1-like protein (AHRD V3.3 *** A0A2G2ZB75_CAPAN)	TRUE
Solyc11g072623.1.1	1.45517	8.67078e-12	4.92403e-10	Unknown protein	TRUE
Solyc12g007040.3.1	1.4541	3.73316e-06	6.09504e-05	Protein kinase, catalytic domain-containing protein (AHRD V3.3 *** A0A2U1L8L5_ARTAN)	FALSE
Solyc03g007870.3.1	1.45072	2.5971e-12	1.60985e-10	heavy metal-associated isoprenylated plant protein 3-like (AHRD V3.3 *** A0A1U8G733_CAPAN)	TRUE
Solyc12g088840.1.1	1.45027	4.77911e-05	0.000570064	EF-hand domain (AHRD V3.3 *** A0A200QZB4_9MAGN)	FALSE
Solyc11g018690.2.1	1.44882	0.00644658	0.033962	ABC transporter G family member 25 (AHRD V3.3 *** A0A1U8GMW2_CAPAN)	FALSE
Solyc09g091660.3.1	1.44727	1.37871e-07	3.26021e-06	Pleiotropic drug resistance protein (AHRD V3.3 *** C8CA13_CUCSA)	TRUE
Solyc01g087580.3.1	1.44725	0.0101198	0.0479378	hypothetical protein (AHRD V3.3 *-* AT3G57450.1)	TRUE
Solyc05g051400.4.1	1.44521	5.17175e-09	1.68275e-07	Mitochondrial uncoupling protein 6 (AHRD V3.3 *** A0A2G3CG15_CAPCH)	TRUE
Solyc05g018050.1.1	1.44258	0.0076909	0.0388184	RING/U-box superfamily protein (AHRD V3.3 *-* A0A2U1KYA3_ARTAN)	FALSE
Solyc03g121420.4.1	1.44112	1.91429e-05	0.000258146	Inorganic pyrophosphatase 1 (AHRD V3.3 *** A0A2G2XXB4_CAPAN)	FALSE
Solyc12g089220.3.1	1.44066	5.18108e-07	1.07416e-05	Bifunctional nuclease 2 (AHRD V3.3 *** A0A2G2Y9Z2_CAPAN)	FALSE
Solyc03g096670.3.1	1.44048	5.18402e-05	0.000610792	Protein phosphatase 2C (AHRD V3.3 *** A0A2U1LBV4_ARTAN)	TRUE
Solyc02g087460.1.1	1.44028	0.000774118	0.0061359	Inactive receptor kinase (AHRD V3.3 *** A0A2R6P9E5_ACTCH)	FALSE
Solyc08g007210.4.1	1.42821	5.84394e-06	9.09467e-05	Transferase domain-containing protein (AHRD V3.3 *** A0A1Q3AZY6_CEPFO)	FALSE
Solyc01g089880.3.1	1.41941	6.16517e-05	0.000710822	PRA1 family protein (AHRD V3.3 *** A0A2G3AMA6_CAPAN)	FALSE
Solyc02g063450.4.1	1.41796	0.00212004	0.014092	Glycine-rich domain-containing protein 2 (AHRD V3.3 *** A0A2G3A574_CAPAN)	TRUE
Solyc06g008730.3.1	1.41588	2.07252e-07	4.71957e-06	Peroxisome biogenesis protein 6 (AHRD V3.3 *** A0A2G3C3V9_CAPCH)	TRUE
Solyc05g023750.3.1	1.41266	0.00183219	0.012534	Adp-ribosylation factor gtpase-activating protein agd3 (AHRD V3.3 *** A0A314LCP5_NICAT)	TRUE
Solyc03g114300.4.1	1.4125	2.58703e-06	4.4047e-05	4-hydroxybenzoate polyprenyltransferase, mitochondrial (AHRD V3.3 *** A0A2G2WRH2_CAPBA)	TRUE
Solyc06g071820.3.1	1.40742	1.22725e-09	4.56127e-08	BTB/POZ and TAZ domain-containing protein 1 (AHRD V3.3 *** A0A2G3BFP5_CAPCH)	TRUE
Solyc12g089000.2.1	1.40532	0.00489834	0.0273164	RBR-type E3 ubiquitin transferase (AHRD V3.3 *** A0A1U8EVL3_CAPAN)	TRUE
Solyc09g089880.3.1	1.4044	3.34656e-08	9.08415e-07	Electron transfer flavoprotein beta-subunit (AHRD V3.3 *** B6TPR6_MAIZE)	FALSE
Solyc05g006750.3.1	1.40183	1.1119e-05	0.000162113	Glutathione S-transferase (AHRD V3.3 *** A0A200QY01_9MAGN)	FALSE
Solyc07g017610.3.1	1.3987	3.72043e-05	0.000459364	Saccharopine dehydrogenase / Homospermidine synthase (AHRD V3.3 *** A0A200PV89_9MAGN)	FALSE
Solyc02g092930.1.1	1.39348	1.33884e-07	3.18776e-06	R2R3MYB transcription factor 44	TRUE
Solyc06g059870.1.1	1.39277	6.5101e-19	1.72527e-16	Unknown protein	TRUE
Solyc12g089090.2.1	1.39043	0.000135833	0.00141047	Protein phosphatase 2C family protein (AHRD V3.3 *** A0A2U1NN53_ARTAN)	FALSE
Solyc10g051120.3.1	1.38508	0.00084019	0.00655728	Mitochondrial pyruvate carrier (AHRD V3.3 *** A0A2G2WMA1_CAPBA)	FALSE
Solyc05g055330.3.1	1.37805	0.00264604	0.016754	Pleiotropic drug resistance protein 2 (AHRD V3.3 *** A0A1U8GRL3_CAPAN)	TRUE
Solyc01g109110.3.1	1.37771	0.00641554	0.0338668	Extra-large guanine nucleotide-binding protein 2 (AHRD V3.3 *** A0A1U8DXD5_CAPAN)	TRUE
Solyc06g071770.4.1	1.37641	7.57654e-07	1.50428e-05	PB1 domain, Zinc finger, ZZ-type, UBA-like, Next to BRCA1, central domain protein (AHRD V3.3 *-* A0A2U1P8J3_ARTAN)	TRUE
Solyc10g046930.3.1	1.37364	0.00685916	0.0355115	AdoMet-dependent rRNA methyltransferase SPB1 (AHRD V3.3 *-* U9TNP9_RHIID)	TRUE
Solyc06g082500.3.1	1.37112	0.00154341	0.0109688	Nucleotide/sugar transporter family protein (AHRD V3.3 *** A0A2K3PIW2_TRIPR)	FALSE
Solyc05g032750.3.1	1.37032	7.99943e-05	0.000884387	protein PLASTID MOVEMENT IMPAIRED 1-RELATED 1 (AHRD V3.3 *** A0A2I4GL70_9ROSI)	TRUE
Solyc01g005970.3.1	1.36798	0.0083307	0.0412274	F-box/kelch-repeat protein (AHRD V3.3 *** A0A1U8GYH7_CAPAN)	TRUE
Solyc01g049910.4.1	1.36673	0.00662868	0.0346122	Membrane-bound transcription factor site-2 protease (AHRD V3.3 *** A0A200QAL7_9MAGN)	FALSE
Solyc04g007823.1.1	1.3667	0.00113066	0.00843888	Kirola (AHRD V3.3 *-* A0A1U8F0U0_CAPAN)	FALSE
Solyc01g094260.4.1	1.36648	7.34126e-05	0.000825598	NAD(P)-binding Rossmann-fold superfamily protein (AHRD V3.3 *** F4JE70_ARATH)	FALSE
Solyc12g096350.2.1	1.36378	0.00627515	0.0332601	WRKY transcription factor 10	TRUE
Solyc08g075550.4.1	1.36165	0.00291281	0.0180984	alternative oxidase 1b	TRUE
Solyc05g012500.3.1	1.35951	0.00322134	0.0196047	WRKY transcription factor 57	TRUE
Solyc07g032740.4.1	1.35863	4.26626e-13	3.1842e-11	Aspartate aminotransferase (AHRD V3.3 *** A0A0J8BGE0_BETVU)	FALSE
Solyc07g053200.4.1	1.35253	0.00591338	0.0316824	Adenine nucleotide alpha hydrolases-like superfamily protein (AHRD V3.3 *** A0A2U1N8C2_ARTAN)	TRUE
Solyc04g005050.1.1	1.34716	0.00318443	0.0194361	Metalloendoproteinase 1 (AHRD V3.3 *** A0A1J3IKZ8_NOCCA)	TRUE
Solyc02g082600.4.1	1.34328	0.00526896	0.028864	Trypsin family protein with PDZ domain-containing protein (AHRD V3.3 *-* A0A178UPC0_ARATH)	FALSE
Solyc09g010430.1.1	1.34117	0.00521034	0.0286545	Unknown protein	TRUE
Solyc12g056860.2.1	1.33714	0.000224789	0.00215774	Transcription factor TGA7 (AHRD V3.3 *** A0A1U8F8B9_CAPAN)	TRUE
Solyc06g066340.4.1	1.33526	0.000499628	0.0042356	Homeodomain-like superfamily protein (AHRD V3.3 *-* A0A2U1QD82_ARTAN)	TRUE
Solyc01g150101.1.1	1.33302	0.000934948	0.00716833	Basic helix-loop-helix (BHLH) DNA-binding superfamily protein (AHRD V3.3 *-* A0A1P8ASG1_ARATH)	TRUE
Solyc10g009290.1.1	1.33237	0.00632375	0.0334595	bHLH transcription factor155	TRUE
Solyc09g007980.1.1	1.33175	0.000257776	0.00242849	Unknown protein	TRUE
Solyc08g076970.3.1	1.32603	3.17191e-06	5.28247e-05	Acetylornithine deacetylase (AHRD V3.3 *** A0A2G2XLB1_CAPBA)	FALSE
Solyc10g084950.3.1	1.32132	0.00267321	0.0168741	Protein NRT1/ PTR FAMILY 5.7 (AHRD V3.3 *** A0A2G2VUL0_CAPBA)	FALSE
Solyc07g063850.3.1	1.32089	1.66714e-07	3.87854e-06	IAA-amido synthetase 3-9	TRUE
Solyc06g067980.3.1	1.31839	0.00011234	0.00119382	repressed By RIM101 protein 1 (AHRD V3.3 --* XP_011091441.1)	TRUE
Solyc02g077100.3.1	1.31798	7.17942e-08	1.7886e-06	Phospholipase A1-IIgamma (AHRD V3.3 *** A0A2U1NY06_ARTAN)	TRUE
Solyc01g090670.3.1	1.31562	0.000784347	0.00619282	nuclear pore complex protein NUP62 (AHRD V3.3 *-* A0A2I4GEZ1_9ROSI)	TRUE
Solyc08g082640.2.1	1.31459	0.00207147	0.0138042	Cellulose synthase (AHRD V3.3 *** A0A200QCL6_9MAGN)	FALSE
Solyc09g082720.3.1	1.31155	8.10979e-09	2.49236e-07	NAD(P)-linked oxidoreductase, aldo/keto reductase family protein (AHRD V3.3 *** A0A1Y1HY98_KLENI)	FALSE
Solyc04g072310.3.1	1.30747	1.97351e-08	5.65297e-07	histone-lysine N-methyltransferase SETD1B-A (AHRD V3.3 *** XP_004237854.1)	TRUE
Solyc06g053610.3.1	1.30531	0.00510756	0.0282251	R2R3MYB transcription factor 14	TRUE
Solyc12g088640.2.1	1.3046	0.00917059	0.0443873	Carbohydrate esterase, putative (DUF303) (AHRD V3.3 *** Q0WNN6_ARATH)	FALSE
Solyc05g009790.1.1	1.30458	5.18398e-08	1.35614e-06	AP2/B3 transcription factor family protein (AHRD V3.3 *** A0A2U1LJK2_ARTAN)	TRUE
Solyc10g007070.4.1	1.30238	0.000702594	0.00565228	Early nodulin-like protein 1 (AHRD V3.3 *-* A0A2G3BCD1_CAPCH)	TRUE
Solyc08g062220.3.1	1.30205	2.43324e-06	4.17004e-05	Glycosyltransferase (AHRD V3.3 *** A0A218W5V3_PUNGR)	FALSE
Solyc07g017640.2.1	1.30138	0.000138395	0.0014338	Lariat debranching enzyme (AHRD V3.3 *** A0A2G3BR26_CAPCH)	TRUE
Solyc05g052410.3.1	1.29913	1.11678e-14	1.14086e-12	Dehydration-responsive element-binding protein 2A (AHRD V3.3 *** A0A1U8GX89_CAPAN)	TRUE
Solyc08g023645.1.1	1.29826	0.000183382	0.00182246	Unknown protein	FALSE
Solyc11g069940.1.1	1.29738	0.000108783	0.00116192	Glutaredoxin (AHRD V3.3 *** A0A118JSL8_CYNCS)	FALSE
Solyc01g006320.4.1	1.29722	0.000555384	0.00463945	Late embryogenesis abundant (LEA) hydroxyproline-rich glycoprotein family (AHRD V3.3 *** Q9LJT9_ARATH)	FALSE
Solyc06g065100.3.1	1.29619	2.72169e-05	0.000349501	R2R3MYB transcription factor 3	TRUE
Solyc10g011660.3.1	1.29272	3.31857e-08	9.03026e-07	Auxin-responsive GH3 family protein (AHRD V3.3 *** A0A2U1NZC8_ARTAN)	FALSE
Solyc01g105450.4.1	1.28842	0.00265135	0.016776	ABC transporter G family member 11 (AHRD V3.3 *** A0A2G2VAJ3_CAPBA)	FALSE
Solyc06g005980.4.1	1.28611	0.00850359	0.0418002	Anthranilate synthase (AHRD V3.3 *** A0A2U1KR52_ARTAN)	TRUE
Solyc11g009010.2.1	1.28604	0.000185266	0.0018362	Alpha/beta-Hydrolases superfamily protein (AHRD V3.3 *-* Q058J1_ARATH)	FALSE
Solyc12g013620.2.1	1.28187	0.000858624	0.00667835	jasmonic acid 2	TRUE
Solyc06g008970.4.1	1.28151	0.00802549	0.0400679	RNA helicase DEAH-box18	FALSE
Solyc10g078440.2.1	1.28006	0.00384134	0.0225498	Sigma factor binding protein 1, chloroplastic (AHRD V3.3 *** A0A2G3BI49_CAPCH)	TRUE
Solyc02g077700.1.1	1.27864	0.00159798	0.0112561	transmembrane protein (AHRD V3.3 *** AT2G33855.1)	FALSE
Solyc01g005420.2.1	1.27601	1.04312e-09	3.92481e-08	C2 calcium-dependent membrane targeting (AHRD V3.3 *-* A0A2U1LLL4_ARTAN)	FALSE
Solyc11g008530.3.1	1.27376	3.83586e-05	0.000470755	Dicer-like 2d	FALSE
Solyc11g010430.2.1	1.27163	0.000331699	0.00299676	Dihydrofolate reductase-like protein (AHRD V3.3 *** A0A2K3MS55_TRIPR)	FALSE
Solyc07g016180.3.1	1.27154	2.72689e-05	0.000349922	Auxin Response Factor 7A	TRUE
Solyc10g077070.2.1	1.27146	0.00543153	0.0296481	Histone-lysine n-methyltransferase, h3 lysine-9 specific suvh1 (AHRD V3.3 *** A0A314L467_NICAT)	TRUE
Solyc09g089580.4.1	1.27086	5.00592e-07	1.04496e-05	2-oxoglutarate (2OG) and Fe(II)-dependent oxygenase superfamily protein (AHRD V3.3 *** A0A2U1QA13_ARTAN)	TRUE
Solyc01g106000.4.1	1.27083	1.02857e-09	3.87804e-08	Nicotinamidase 1 (AHRD V3.3 *** A0A1U8DWC4_CAPAN)	FALSE
Solyc04g082380.4.1	1.266	0.000228166	0.00218327	cytochrome P450 86A8-like (AHRD V3.3 *-* A0A2I4DDX4_9ROSI)	TRUE
Solyc01g006700.3.1	1.26551	0.00709129	0.036353	downstream neighbor of Son (AHRD V3.3 *** AT3G54750.4)	TRUE
Solyc09g005860.3.1	1.26537	2.2561e-05	0.000297441	Ankyrin repeat-containing protein (AHRD V3.3 *** A0A2G3BJS8_CAPCH)	FALSE
Solyc02g077720.4.1	1.26427	7.86541e-12	4.50868e-10	Unknown protein	TRUE
Solyc01g090180.4.1	1.2616	0.00157845	0.0111571	4,5-DOPA dioxygenase extradiol (AHRD V3.3 *** A0A1U8ED16_CAPAN)	FALSE
Solyc09g009880.3.1	1.26034	6.27312e-11	3.06664e-09	F-box-like domain-containing protein (AHRD V3.3 *** A0A1Q3BFU9_CEPFO)	TRUE
Solyc10g086620.2.1	1.25961	0.00205666	0.0137406	NAD(P)-binding Rossmann-fold superfamily protein (AHRD V3.3 *** F4IKL5_ARATH),Pfam:PF13561	FALSE
Solyc02g020890.4.1	1.25741	0.00461669	0.0261365	alpha/beta-Hydrolases superfamily protein (AHRD V3.3 *** AT3G19970.5)	FALSE
Solyc01g080500.2.1	1.25619	1.64351e-13	1.31812e-11	Plant/F10N7-170 protein, putative (AHRD V3.3 *** G7IFN2_MEDTR)	TRUE
Solyc10g074740.2.1	1.25586	1.36009e-09	5.01424e-08	Calcium-binding protein CAST (AHRD V3.3 *** A0A1U8EHD5_CAPAN)	FALSE
Solyc02g063520.3.1	1.25167	0.00840868	0.0415153	Homeobox-leucine zipper protein HAT22 (AHRD V3.3 *** A0A2G2XBJ3_CAPBA)	FALSE
Solyc02g094030.3.1	1.25055	9.28157e-09	2.81464e-07	DSR6 (AHRD V3.3 *** A0A076V4W1_CAPAN)	TRUE
Solyc05g018760.3.1	1.25017	0.00365608	0.0216921	RING/U-box superfamily protein (AHRD V3.3 *-* Q3EAE6_ARATH)	FALSE
Solyc12g013920.2.1	1.24861	3.39743e-11	1.73535e-09	Protein yippee-like (AHRD V3.3 *** A0A1U8EEB0_CAPAN)	FALSE
Solyc08g075280.4.1	1.24692	8.31022e-06	0.000125587	AT4g19390/T5K18_170 (AHRD V3.3 *-* Q94JM4_ARATH)	FALSE
Solyc01g090800.3.1	1.24434	5.5238e-05	0.000643364	cyclinU2_1	FALSE
Solyc12g099190.1.1	1.24301	0.000154789	0.001579	Pectinesterase inhibitor (AHRD V3.3 *** A0A2U1NF42_ARTAN)	FALSE
Solyc09g090730.2.1	1.24268	1.31735e-07	3.14747e-06	AMT1	FALSE
Solyc03g083420.4.1	1.23999	4.04381e-06	6.53803e-05	OBP3-responsive protein 1 (AHRD V3.3 *** AT5G53450.1)	TRUE
Solyc10g085140.2.1	1.23752	3.36956e-07	7.37912e-06	Alkyl transferase (AHRD V3.3 *** K7X479_SOLLC)	FALSE
Solyc12g098190.2.1	1.23632	0.00204386	0.0136701	F-box protein (AHRD V3.3 *** A0A2G3B4N2_CAPCH)	TRUE
Solyc05g010590.4.1	1.2359	0.00102303	0.0077494	WPP domain-interacting tail-anchored protein 2 (AHRD V3.3 *** A0A1J3HWE7_NOCCA)	TRUE
Solyc03g117840.4.1	1.23364	7.46064e-05	0.000835939	elongation factor (AHRD V3.3 *** AT5G43150.1)	FALSE
Solyc03g112950.4.1	1.23291	0.005909	0.0316722	Serine/threonine-protein kinase ATM (AHRD V3.3 *** A0A2G3A1I9_CAPAN)	TRUE
Solyc03g013440.4.1	1.22559	0.00344574	0.0206946	Amino acid transporter (AHRD V3.3 *-* A0A200QES2_9MAGN)	FALSE
Solyc07g006410.1.1	1.22526	0.00404409	0.0234837	transmembrane protein (AHRD V3.3 *** AT4G16850.1)	FALSE
Solyc09g005010.4.1	1.22478	0.000552486	0.00462128	Importin subunit beta-1 (AHRD V3.3 *** A0A2G3BM60_CAPCH)	FALSE
Solyc01g110310.3.1	1.22468	3.13466e-14	2.85176e-12	GATA transcription factor (AHRD V3.3 *** K4B3P4_SOLLC)	TRUE
Solyc02g089370.2.1	1.2242	0.00764848	0.0386674	ARM repeat superfamily protein (AHRD V3.3 *** A0A2U1PEI4_ARTAN)	TRUE
Solyc05g015850.4.1	1.22149	0.00083369	0.00651211	WRKY transcription factor 75	FALSE
Solyc06g009140.3.1	1.21579	9.75942e-11	4.52946e-09	Late embryogenesis abundant protein Lea5 (AHRD V3.3 *** A0A1J3JXG8_NOCCA)	TRUE
Solyc09g063010.4.1	1.21219	1.36032e-06	2.50755e-05	bHLH transcription factor 058	TRUE
Solyc06g072840.3.1	1.21153	7.13782e-09	2.22734e-07	hypothetical protein (AHRD V3.3 *** AT3G03150.1)	FALSE
Solyc01g106830.4.1	1.21147	0.000403083	0.00353176	Phytosulfokine (AHRD V3.3 *** A0A2U1MA32_ARTAN)	TRUE
Solyc05g007510.4.1	1.21118	0.0045468	0.0258127	RNA-directed RNA polymerase	TRUE
Solyc09g065850.4.1	1.20882	1.86024e-15	2.20885e-13	auxin-regulated IAA3	TRUE
Solyc12g006380.2.1	1.20856	1.96226e-07	4.50778e-06	2-oxoglutarate-dependent dioxygenase	TRUE
Solyc04g082460.4.1	1.20808	0.000701316	0.00564697	Catalase (AHRD V3.3 *** A0A2G2X1I6_CAPBA)	TRUE
Solyc09g014280.1.1	1.20625	3.48411e-06	5.73451e-05	HXXXD-type acyl-transferase family protein (AHRD V3.3 *** V5PZN5_9CARY)	TRUE
Solyc06g076880.3.1	1.20548	3.79069e-09	1.26721e-07	Quinone reductase (AHRD V3.3 *** F8WQS4_NICBE)	TRUE
Solyc06g071280.4.1	1.20488	7.45238e-05	0.000835525	Enhanced disease susceptibility 1 protein (AHRD V3.3 *** Q2TQV0_SOLTU)	TRUE
Solyc07g052830.4.1	1.20424	0.0101997	0.0481817	DNA-binding storekeeper transcriptional regulator (AHRD V3.3 *-* A0A2K3LQD1_TRIPR)	TRUE
Solyc09g009220.4.1	1.20403	0.00128593	0.0093983	histone-lysine N-methyltransferase SETD1B-like protein (AHRD V3.3 *** AT5G03670.1)	TRUE
Solyc06g048750.3.1	1.20071	2.63796e-05	0.000340421	Unknown protein	FALSE
Solyc06g076280.3.1	1.1979	0.00340087	0.0204807	Transcription factor GRAS (AHRD V3.3 *** A0A2U1MZS4_ARTAN)	TRUE
Solyc06g050500.2.1	1.19561	0.000951405	0.00727925	abscisic acid receptor PYL4-like (AHRD V3.3 *** A0A2I4EQL0_9ROSI)	FALSE
Solyc09g089650.1.1	1.19464	3.56151e-07	7.7072e-06	hypothetical protein (AHRD V3.3 *** AT1G04330.1)	TRUE
Solyc08g076860.3.1	1.19323	2.44546e-05	0.000319869	PLATZ transcription factor family protein (AHRD V3.3 *** F4IEB6_ARATH)	TRUE
Solyc01g010185.1.1	1.18892	3.29592e-08	8.9954e-07	Retrovirus-related Pol polyprotein from transposon TNT 1-94 (AHRD V3.3 *-* A0A2K3MSD0_TRIPR)	TRUE
Solyc08g065610.3.1	1.18565	1.03665e-05	0.000152996	Vacuolar-processing enzyme (AHRD V3.3 *** A0A2G2VI36_CAPBA)	TRUE
Solyc11g068950.3.1	1.18477	1.53879e-05	0.000214469	BEL1-like homeodomain protein 1 (AHRD V3.3 *** A0A2G2YH01_CAPAN)	TRUE
Solyc07g007130.1.1	1.1843	6.40217e-05	0.000735827	NHL domain protein (AHRD V3.3 *** A0A1P8BDM5_ARATH)	TRUE
Solyc01g109170.3.1	1.18238	9.64113e-07	1.84676e-05	Cold-regulated plasma membrane protein 2 (AHRD V3.3 *** A0A1U8E7A7_CAPAN)	FALSE
Solyc07g005640.3.1	1.18112	0.000704661	0.00566642	26S proteasome non-ATPase regulatory subunit 9 (AHRD V3.3 *** A0A2I4DUP1_9ROSI)	TRUE
Solyc09g008010.3.1	1.17955	0.00649954	0.0341231	Protein kinase (AHRD V3.3 *** Q9M7J5_ELYEL)	TRUE
Solyc05g054370.2.1	1.17927	7.07433e-07	1.41224e-05	Acyl-CoA dehydrogenase family member 10 (AHRD V3.3 *** A0A1J3CLI6_NOCCA)	FALSE
Solyc02g071210.3.1	1.17766	3.87875e-12	2.34082e-10	Cold-regulated inner membrane protein 2, chloroplastic (AHRD V3.3 *** A0A2G3D4Q0_CAPCH)	FALSE
Solyc06g053980.3.1	1.17757	0.000160346	0.00162485	Chlorophyllase 2 (AHRD V3.3 *** A0A2U1KJW6_ARTAN)	FALSE
Solyc02g068900.3.1	1.17573	2.02147e-08	5.74878e-07	Glutathione S-transferase (AHRD V3.3 *** A0A200QN08_9MAGN)	FALSE
Solyc08g076650.3.1	1.17507	7.03977e-07	1.40688e-05	Trehalose-6-phosphate synthase (AHRD V3.3 *** E5GC29_CUCME)	TRUE
Solyc08g076790.3.1	1.17503	6.55927e-07	1.32974e-05	NAD(P)-binding Rossmann-fold superfamily protein (AHRD V3.3 *** A0A2U1LGD5_ARTAN)	TRUE
Solyc07g043230.3.1	1.17441	0.00134732	0.00979206	Zinc transporter protein (AHRD V3.3 *** A5BDR3_VITVI)	FALSE
Solyc03g118880.3.1	1.17351	0.000152722	0.00156103	Unknown protein	FALSE
Solyc08g016150.1.1	1.1731	0.00996683	0.0473632	Avr9/Cf-9 rapidly elicited protein 180 (AHRD V3.3 *** Q9FQZ1_TOBAC)	TRUE
Solyc09g009440.3.1	1.16986	0.00627173	0.0332516	Iron-sulfur assembly protein IscA-like 1, mitochondrial (AHRD V3.3 *** A0A2G2YPA5_CAPAN)	FALSE
Solyc01g109810.2.1	1.16935	0.000414401	0.00362052	tRNA-methyltransferase non-catalytic subunit trm6MTase subunit (AHRD V3.3 *** Q9FJZ5_ARATH)	TRUE
Solyc06g075370.3.1	1.16907	0.00235905	0.0153188	Dof zinc finger protein (AHRD V3.3 *** A0A2K3LIE4_TRIPR)	TRUE
Solyc01g007070.3.1	1.1689	3.48947e-05	0.000432894	BEL1-like homeodomain protein 3 (AHRD V3.3 *** A0A2G3AY56_CAPCH)	TRUE
Solyc07g006820.4.1	1.16779	0.000441736	0.00381198	Transcription initiation factor TFIID subunit 1 (AHRD V3.3 *** A0A2G2WAA9_CAPBA)	TRUE
Solyc05g052470.3.1	1.16728	4.49916e-11	2.25402e-09	Ferritin (AHRD V3.3 *** A0A2G3CHZ4_CAPCH)	FALSE
Solyc11g073200.2.1	1.16727	0.000102819	0.00110273	11-S seed storage protein (AHRD V3.3 *** A0A200Q154_9MAGN)	FALSE
Solyc03g113270.3.1	1.16568	4.60961e-10	1.87314e-08	LEVAHOX1G L.esculentum homeobox	TRUE
Solyc07g044760.3.1	1.16426	0.00698866	0.0359884	RNA helicase DEAD23	TRUE
Solyc02g088957.1.1	1.1639	0.00227974	0.0149257	Unknown protein	FALSE
Solyc09g091030.3.1	1.16162	4.62623e-07	9.74599e-06	Beta-amylase (AHRD V3.3 *** Q1L5W8_NICLS)	TRUE
Solyc01g006880.4.1	1.16081	0.000436658	0.00377528	Histone-lysine N-methyltransferase ATXR7 (AHRD V3.3 *-* A0A2G3AXS4_CAPCH)	TRUE
Solyc02g083380.3.1	1.15877	1.22812e-08	3.65755e-07	Big1 (AHRD V3.3 *-* AT2G17710.1)	FALSE
Solyc05g054570.3.1	1.15722	1.78386e-05	0.000242868	CRAL-TRIO lipid binding domain-containing protein (AHRD V3.3 *** A0A2U1PXE9_ARTAN)	TRUE
Solyc03g115150.4.1	1.15519	1.0001e-08	3.01779e-07	Histone deacetylase (AHRD V3.3 *** A0A2G3A292_CAPAN)	FALSE
Solyc05g006760.4.1	1.14874	0.000249832	0.00236217	Tetratricopeptide repeat (TPR)-like superfamily protein (AHRD V3.3 *** A0A2U1KMN1_ARTAN)	FALSE
Solyc10g085030.1.1	1.14724	5.64514e-13	4.04812e-11	Heme-binding-like protein (AHRD V3.3 *** A0A2I0X8X3_9ASPA)	FALSE
Solyc10g006800.4.1	1.14669	0.00225215	0.0147609	Cyclic nucleotide-gated ion channel 4 (AHRD V3.3 *** A0A2G2V344_CAPBA)	TRUE
Solyc12g008830.3.1	1.14619	6.36276e-08	1.61821e-06	GATA transcription factor 16 (AHRD V3.3 *** A0A2G2YUT6_CAPAN)	TRUE
Solyc09g065100.3.1	1.14615	0.00117338	0.00869738	bHLH transcription factor 150	TRUE
Solyc12g094450.3.1	1.14585	5.25039e-13	3.82504e-11	Enoyl-CoA hydratase 2, peroxisomal (AHRD V3.3 *** A0A2G2V0C5_CAPBA)	FALSE
Solyc01g098590.3.1	1.14552	3.00139e-05	0.000379291	Phosphoglycerate mutase-like protein AT74 (AHRD V3.3 *** A0A2G2YZL9_CAPAN)	FALSE
Solyc03g122120.4.1	1.14417	0.00117428	0.00870054	3-oxoacyl-[acyl-carrier-protein] synthase (AHRD V3.3 *** A0A2G2ZVR7_CAPAN)	TRUE
Solyc05g006940.3.1	1.14076	3.82163e-05	0.000469956	Regulator of chromosome condensation (RCC1) family protein (AHRD V3.3 *** A0A2U1PVX2_ARTAN)	TRUE
Solyc04g005520.3.1	1.14041	0.000352935	0.00315434	Amino acid kinase family protein (AHRD V3.3 *** A0A2U1KEH8_ARTAN)	FALSE
Solyc07g062810.4.1	1.13948	1.17235e-05	0.000169518	D-amino-acid transaminase, chloroplastic (AHRD V3.3 *** A0A2G2Z4Z6_CAPAN)	FALSE
Solyc08g079420.3.1	1.13882	0.00157345	0.011138	Cytochrome P450 (AHRD V3.3 *** A0A200QB17_9MAGN)	FALSE
Solyc10g054100.3.1	1.13565	6.77305e-08	1.71066e-06	Protein DETOXIFICATION (AHRD V3.3 *** S8CW50_9LAMI)	FALSE
Solyc04g079210.3.1	1.13323	3.23539e-10	1.33549e-08	Patatin (AHRD V3.3 *** A0A2G2X0P8_CAPBA)	TRUE
Solyc02g092770.3.1	1.1329	0.00931516	0.0449201	Sigma-B regulation protein RsbQ (AHRD V3.3 *** A0A2V2Z439_9BACL)	FALSE
Solyc11g044560.3.1	1.1321	1.43302e-05	0.000201725	ABSCISIC ACID-INSENSITIVE 5-like protein 5 (AHRD V3.3 *** A0A1U8GBR9_CAPAN)	TRUE
Solyc06g082810.3.1	1.13083	9.33628e-06	0.000139708	Oligoribonuclease (AHRD V3.3 *** A0A2G2ZEC5_CAPAN)	TRUE
Solyc07g063940.2.1	1.13005	0.00238075	0.0154159	SCARECROW	TRUE
Solyc08g066950.3.1	1.12823	1.18483e-06	2.22898e-05	1-deoxy-D-xylulose 5-phosphate synthase 1 (AHRD V3.3 *** Q8L693_MEDTR)	FALSE
Solyc03g095770.3.1	1.12572	6.32196e-08	1.61008e-06	WRKY transcription factor 80	TRUE
Solyc01g005030.4.1	1.12557	1.48786e-06	2.71798e-05	MAP kinase kinase kinase 1	FALSE
Solyc09g005730.4.1	1.12514	0.00112009	0.00837021	Plant protein 1589 of Uncharacterized protein function (AHRD V3.3 *** A0A061EZD3_THECC)	TRUE
Solyc06g068490.3.1	1.12077	0.000215053	0.0020873	Magnesium transporter MRS2-B (AHRD V3.3 *** A0A2G2WL88_CAPBA)	TRUE
Solyc05g011890.1.1	1.12049	6.08307e-08	1.5601e-06	Sulfotransferase (AHRD V3.3 *** A0A2G3B6Y2_CAPCH)	TRUE
Solyc08g068780.3.1	1.12007	9.04656e-07	1.74684e-05	N-hydroxycinnamoyl-CoA:tyramine N-hydroxycinnamoyl transferase THT7-8	FALSE
Solyc03g111310.3.1	1.11814	0.000460577	0.00396112	Snf1-related protein kinase regulatory subunit gamma-1 (AHRD V3.3 *** A0A1J6IJ95_NICAT)	TRUE
Solyc02g030210.4.1	1.117	0.000415242	0.00362613	AP2-like ethylene-responsive transcription factor (AHRD V3.3 *** A0A2G3D2M5_CAPCH)	TRUE
Solyc08g066220.4.1	1.11659	1.49429e-05	0.000209224	Serine decarboxylase (AHRD V3.3 *** A0A2G3AU85_CAPCH)	FALSE
Solyc07g061800.4.1	1.11577	0.000264626	0.00248024	Heme-binding-like protein (AHRD V3.3 *** A0A2I0X1C8_9ASPA)	TRUE
Solyc09g064940.2.1	1.1154	1.13658e-11	6.30572e-10	Phenazine biosynthesis PhzF protein (AHRD V3.3 *** A0A200Q4V2_9MAGN)	FALSE
Solyc01g079360.4.1	1.11456	1.28106e-05	0.000183298	WRKY transcription factor 37	TRUE
Solyc01g101130.3.1	1.11237	8.2911e-07	1.62174e-05	Myosin heavy chain, cardiac protein (AHRD V3.3 *** A0A2P5D8H8_PARAD)	TRUE
Solyc04g071990.3.1	1.1121	0.00317467	0.0194024	Protein GIGANTEA (AHRD V3.3 *** A0A2G2ZPW3_CAPAN)	TRUE
Solyc01g100960.3.1	1.10907	0.00222816	0.0146509	Glucose-6-phosphate 1-dehydrogenase (AHRD V3.3 *** A0A1U8GXG1_CAPAN)	FALSE
Solyc09g072700.4.1	1.10885	0.0014026	0.0101455	Peroxidase (AHRD V3.3 *** K4CUU6_SOLLC)	FALSE
Solyc06g069430.3.1	1.10597	3.83093e-05	0.000470466	FRUITFULL-like MADS-box 1	TRUE
Solyc01g006290.4.1	1.10591	0.00585605	0.031449	Peroxidase (AHRD V3.3 *** K4ASJ5_SOLLC)	TRUE
Solyc05g005280.4.1	1.10487	3.21493e-05	0.000403212	Poly [ADP-ribose] polymerase (AHRD V3.3 *** A0A2G2WJW6_CAPBA)	TRUE
Solyc07g054730.1.1	1.10468	4.04958e-05	0.000493671	Wound-responsive family protein (AHRD V3.3 *** AT4G28240.1)	TRUE
Solyc05g014790.3.1	1.10368	0.00109727	0.00823672	Lipoxygenase (AHRD V3.3 *** K4BYJ7_SOLLC)	TRUE
Solyc03g081330.1.1	1.1033	0.00106818	0.00805477	Avr9/Cf-9 rapidly elicited protein (AHRD V3.3 -** AT5G54165.1)	TRUE
Solyc04g015200.3.1	1.10008	0.0038001	0.022394	ATP-dependent 6-phosphofructokinase (AHRD V3.3 *** A0A2G3CDP5_CAPCH)	TRUE
Solyc10g009580.4.1	1.09997	0.0011583	0.00859606	Glycosyltransferase (AHRD V3.3 *** A0A2I4F8D3_9ROSI)	FALSE
Solyc07g150102.1.1	1.09838	0.00697374	0.0359662	Unknown protein	FALSE
Solyc04g051450.3.1	1.09646	0.00586045	0.0314633	TSL-kinase interacting protein 1 (AHRD V3.3 *** A0A2I4GQN6_9ROSI)	TRUE
Solyc07g051840.4.1	1.09531	0.00448183	0.0255153	WRKY transcription factor 17	TRUE
Solyc12g005340.3.1	1.09503	1.98439e-05	0.000266019	Transcription factor GRAS (AHRD V3.3 *** A0A200QMI2_9MAGN)	TRUE
Solyc10g006780.4.1	1.09445	0.000314437	0.00285348	Telomere length regulation protein TEL2-like protein (AHRD V3.3 *** A0A1J3CX06_NOCCA)	TRUE
Solyc12g045030.2.1	1.09363	4.14313e-08	1.11414e-06	NAD(P)-binding Rossmann-fold superfamily protein (AHRD V3.3 *** Q94AL3_ARATH)	FALSE
Solyc02g085300.4.1	1.09178	0.000287166	0.0026494	Unknown protein	FALSE
Solyc08g006970.4.1	1.0912	0.00237154	0.0153835	Plant intracellular Ras-group-related LRR protein (AHRD V3.3 *** A0A2R6PDI6_ACTCH)	FALSE
Solyc08g076960.1.1	1.09038	0.00240818	0.0155263	Abscisic acid receptor PYL1 (AHRD V3.3 *** A0A2G3DCH7_CAPCH)	TRUE
Solyc11g071700.2.1	1.09016	1.37189e-07	3.2556e-06	ubiquitin carboxyl-terminal hydrolase 12 (AHRD V3.3 *** A0A2I4H4Q0_9ROSI)	TRUE
Solyc01g079670.2.1	1.09004	0.00105775	0.00797937	Cotton fiber protein (AHRD V3.3 *** Q570M0_ARATH)	TRUE
Solyc10g048030.2.1	1.08879	1.08545e-19	3.74499e-17	MLP-like protein 43 (AHRD V3.3 *** A0A2U1KXS7_ARTAN)	FALSE
Solyc05g053590.4.1	1.08697	0.00152149	0.0108357	Pleiotropic drug resistance protein (AHRD V3.3 *** C8CA13_CUCSA)	FALSE
Solyc02g091930.3.1	1.08647	1.99331e-08	5.67752e-07	Homeobox-leucine zipper protein HOX27 (AHRD V3.3 *** A0A2G3D8F8_CAPCH)	TRUE
Solyc08g007080.4.1	1.08464	0.00139377	0.0100897	type I inositol polyphosphate 5-phosphatase 2-like (AHRD V3.3 *** A0A2I4GAB5_9ROSI)	TRUE
Solyc03g119200.4.1	1.08252	0.00049874	0.00423396	L-Ala-D/L-amino acid epimerase (AHRD V3.3 *** A0A1U8FVL6_CAPAN)	FALSE
Solyc12g096210.2.1	1.08114	0.00303803	0.018749	Unknown protein	FALSE
Solyc07g045350.4.1	1.08026	0.00498201	0.0276399	Acetyl-CoA C-acetyltransferase (AHRD V3.3 *** D9U856_BACMN)	FALSE
Solyc11g010850.2.1	1.07948	3.10168e-07	6.8582e-06	1-deoxy-d-xylulose-5-phosphate synthase 1 (AHRD V3.3 *** A0A2U1PQH9_ARTAN)	TRUE
Solyc09g092430.3.1	1.07918	2.21368e-12	1.38628e-10	Selenium-binding protein (AHRD V3.3 *** A0A200Q5C9_9MAGN)	FALSE
Solyc08g074740.3.1	1.07686	0.00563491	0.0305199	Poly [ADP-ribose] polymerase (AHRD V3.3 *** A0A2G3AGA5_CAPAN)	TRUE
Solyc06g008870.2.1	1.07603	0.0014254	0.010282	Gibberellin receptor (AHRD V3.3 *** E3VJP7_9FABA)	FALSE
Solyc09g009080.4.1	1.07356	0.000436308	0.00377422	DNA demethylase1	TRUE
Solyc02g062370.4.1	1.07319	0.00257277	0.0163808	Zinc finger CCCH domain-containing protein 19 (AHRD V3.3 *** A0A2G2XGC4_CAPBA)	TRUE
Solyc01g067895.1.1	1.07266	0.00463677	0.0262339	Unknown protein	TRUE
Solyc07g019670.4.1	1.06856	4.59297e-06	7.32233e-05	Peroxisomal fatty acid beta-oxidation multifunctional protein (AHRD V3.3 *** B6SXV4_MAIZE)	FALSE
Solyc07g045330.3.1	1.06709	0.00128195	0.00937672	GPCR-type G protein 2 (AHRD V3.3 *** A0A1J3CS42_NOCCA)	FALSE
Solyc03g115920.3.1	1.06256	1.66819e-10	7.21149e-09	RBR-type E3 ubiquitin transferase (AHRD V3.3 *** A0A1U8GHK6_CAPAN)	FALSE
Solyc01g096810.3.1	1.06004	4.5628e-06	7.28693e-05	EIL3	TRUE
Solyc03g116320.3.1	1.05881	0.00027605	0.00257019	TCP transcription factor 16	TRUE
Solyc07g054770.1.1	1.05673	0.000279903	0.00259756	Wound-responsive family protein (AHRD V3.3 *** A0A2K3L288_TRIPR)	TRUE
Solyc12g096830.2.1	1.05563	0.000145054	0.00149518	Glycosyltransferase (AHRD V3.3 *** A0A2I4H5B3_9ROSI)	FALSE
Solyc03g122190.3.1	1.05531	1.73399e-07	4.02893e-06	Protein TIFY 10A (AHRD V3.3 *** A0A2G2WQ40_CAPBA)	TRUE
Solyc02g077770.3.1	1.05442	1.34186e-05	0.000191319	F-box domain-containing protein (AHRD V3.3 *** A0A2U1MSG2_ARTAN)	FALSE
Solyc03g097520.3.1	1.05416	0.000176226	0.00175899	Histidine kinase-, DNA gyrase B-, and HSP90-like ATPase family protein (AHRD V3.3 *-* A0A1P8BEQ3_ARATH)	TRUE
Solyc05g052550.1.1	1.05059	1.6757e-05	0.000230737	Zinc finger CCCH domain-containing protein 47 (AHRD V3.3 *-* A0A1U8GQ71_CAPAN)	TRUE
Solyc04g050920.3.1	1.04999	5.73631e-06	8.94239e-05	DNA-directed RNA polymerase subunit alpha (AHRD V3.3 *** AT3G54310.1)	TRUE
Solyc04g017750.4.1	1.0486	0.000295744	0.00271037	Plant calmodulin-binding-like protein (AHRD V3.3 *-* G7KRQ7_MEDTR)	TRUE
Solyc01g006580.4.1	1.04846	0.00110045	0.00825041	2-oxoglutarate (2OG) and Fe(II)-dependent oxygenase superfamily protein (AHRD V3.3 *** A0A2U1LXD5_ARTAN)	FALSE
Solyc07g043500.1.1	1.04812	0.000245684	0.00232776	Glycosyltransferase (AHRD V3.3 *** C5NN15_CATRO)	TRUE
Solyc07g064700.4.1	1.04804	0.000366697	0.00325981	Bromodomain-containing protein (AHRD V3.3 *** A0A2K3PD43_TRIPR)	TRUE
Solyc09g007910.4.1	1.04763	6.28891e-11	3.06664e-09	Phenylalanine ammonia-lyase (AHRD V3.3 *** A0A2G2YQ27_CAPAN)	TRUE
Solyc02g092750.3.1	1.04704	6.04268e-05	0.00069846	Protein phosphatase 2C family protein (AHRD V3.3 *** A0A2U1MLG3_ARTAN)	FALSE
Solyc08g060920.4.1	1.04402	0.00306403	0.0188522	IDS4-like	TRUE
Solyc01g107170.2.1	1.04382	5.22479e-10	2.10442e-08	Zinc finger protein (AHRD V3.3 *** A0T3Q5_SOLTU)	TRUE
Solyc11g013110.2.1	1.04333	6.52079e-17	1.04596e-14	2-oxoglutarate (2OG) and Fe(II)-dependent oxygenase superfamily protein (AHRD V3.3 *** AT1G49390.1)	FALSE
Solyc01g073770.2.1	1.04096	2.3936e-05	0.000313984	PRLI-interacting factor (AHRD V3.3 *-* AT5G19900.5)	TRUE
Solyc03g006660.3.1	1.03999	0.00659233	0.0344618	Protein kinase superfamily protein (AHRD V3.3 *** F4I8V6_ARATH)	FALSE
Solyc12g040320.2.1	1.03957	0.00644882	0.033964	Plant intracellular Ras-group-related LRR protein (AHRD V3.3 *** A0A2R6PRR8_ACTCH)	FALSE
Solyc03g026060.3.1	1.0392	5.17062e-05	0.000609606	Ankyrin repeat-containing protein (AHRD V3.3 *** A0A2U1MVN7_ARTAN)	TRUE
Solyc01g079650.3.1	1.03553	1.51063e-05	0.000210865	CTP synthase (AHRD V3.3 *** A0A2G3AL34_CAPAN)	FALSE
Solyc11g010810.1.1	1.03467	4.61593e-05	0.000553125	UDP-glycosyltransferase 91A1 (AHRD V3.3 *** A0A2G2Y5N3_CAPAN)	FALSE
Solyc09g091550.3.1	1.03455	0.000293771	0.00269945	S-adenosyl-L-methionine-dependent methyltransferases superfamily protein (AHRD V3.3 *** A0A2U1PMX3_ARTAN)	FALSE
Solyc01g010250.4.1	1.0343	0.00145166	0.0104508	6-phosphogluconolactonase (AHRD V3.3 *** B6U0H2_MAIZE)	FALSE
Solyc04g008700.3.1	1.03386	0.000843835	0.00658292	Pre-mRNA-processing protein 40C (AHRD V3.3 *** A0A2G2ZGP4_CAPAN)	TRUE
Solyc01g006555.1.1	1.03086	4.16642e-06	6.71496e-05	Lipoxygenase (AHRD V3.3 *** C0KKU8_SOLLC)	TRUE
Solyc01g090730.3.1	1.02963	0.00346679	0.0208053	Squamosa promoter binding protein 8b	TRUE
Solyc05g005930.3.1	1.02841	0.000109322	0.00116661	Glycosyltransferase (AHRD V3.3 *** A0A2I4G8J4_9ROSI)	FALSE
Solyc07g008000.4.1	1.02747	0.000499422	0.0042356	RabGAP/TBC domain-containing protein (AHRD V3.3 *** A0A2U1MDC7_ARTAN)	TRUE
Solyc09g091850.4.1	1.02618	0.00386117	0.0226517	Non-lysosomal glucosylceramidase (AHRD V3.3 *** A0A328D7Z8_9ASTE)	TRUE
Solyc04g078640.3.1	1.02595	0.00111083	0.00831802	Ethylene-responsive transcription factor RAP2-1 (AHRD V3.3 *** A0A1U8GBU2_CAPAN)	TRUE
Solyc03g032150.3.1	1.02428	4.73268e-05	0.000565263	Protein kinase domain (AHRD V3.3 *-* A0A200PQX9_9MAGN)	TRUE
Solyc09g005760.3.1	1.02368	0.0094324	0.045342	U3 ribonucleoprotein (Utp) family protein (AHRD V3.3 *** F4JHI1_ARATH),Pfam:PF04615	TRUE
Solyc10g086780.2.1	1.0233	6.60039e-06	0.000101471	2-oxoglutarate (2OG) and Fe(II)-dependent oxygenase superfamily protein (AHRD V3.3 *** Q84K82_ARATH)	FALSE
Solyc07g052470.3.1	1.02308	0.00339892	0.0204807	Syntaxin-132 (AHRD V3.3 *** A0A2U1NHB7_ARTAN)	TRUE
Solyc05g015510.3.1	1.02027	0.00526482	0.02885	Squamosa promoter-binding protein 10	TRUE
Solyc07g040990.4.1	1.02015	0.00640318	0.0338113	Protein phosphatase 2C 77 (AHRD V3.3 *** A0A2G3BYZ4_CAPCH)	TRUE
Solyc09g014500.3.1	1.01945	4.00089e-09	1.32777e-07	Protein yippee-like (AHRD V3.3 *** A0A2G3BKF5_CAPCH)	FALSE
Solyc06g050930.3.1	1.01891	0.00608675	0.0324496	Cytosolic endo-beta-N-acetylglucosaminidase-like protein (AHRD V3.3 *** A0A2K3NXL7_TRIPR)	TRUE
Solyc08g014300.4.1	1.01809	0.00477323	0.0268234	FAM136A-like protein (DUF842) (AHRD V3.3 *** Q5BQ23_ARATH)	FALSE
Solyc10g044450.3.1	1.01697	0.00135362	0.00983016	Regulator of nonsense transcripts UPF3 (AHRD V3.3 *** A0A2I0X275_9ASPA)	TRUE
Solyc04g014210.3.1	1.01578	0.000199954	0.00195632	RNA helicase DEAH-box12	FALSE
Solyc07g056070.2.1	1.01526	0.0028314	0.0177372	Mitochondrial 37S ribosomal protein S27 (AHRD V3.3 *** A0A1J3EW96_NOCCA)	TRUE
Solyc10g005630.3.1	1.01436	3.87638e-07	8.29433e-06	Protein kinase superfamily protein (AHRD V3.3 *** A0A2U1KM25_ARTAN)	FALSE
Solyc06g076780.3.1	1.01255	6.70426e-11	3.23467e-09	Glycosyl hydrolase family protein (AHRD V3.3 *** A0A2U1PL05_ARTAN)	TRUE
Solyc05g014260.3.1	1.01174	0.000750663	0.00597589	Two-component response regulator (AHRD V3.3 *** A0A2G3B918_CAPCH)	TRUE
Solyc02g091660.3.1	1.01158	0.00378326	0.0223091	transcription factor GTE2-like (AHRD V3.3 *** A0A1S4DMM5_TOBAC)	TRUE
Solyc11g010250.1.1	1.01075	0.00672731	0.0349774	Avr9/Cf-9 rapidly elicited protein 75 (AHRD V3.3 *** Q9FQY9_TOBAC)	FALSE
Solyc01g105660.4.1	1.0105	2.25419e-05	0.000297404	2-oxoglutarate (2OG) and Fe(II)-dependent oxygenase superfamily protein (AHRD V3.3 *** F4INZ9_ARATH)	FALSE
Solyc03g116100.3.1	1.01015	0.000102627	0.00110196	R2R3MYB transcription factor 31	TRUE
Solyc12g017960.1.1	1.00984	0.00084958	0.00661927	hypothetical protein (AHRD V3.3 *** AT2G44010.1)	FALSE
Solyc04g064530.1.1	1.00763	0.00479629	0.0268991	polyadenylate-binding protein 1-B-binding protein (AHRD V3.3 *** AT4G19950.1)	FALSE
Solyc01g005930.3.1	1.00551	5.38522e-05	0.000630436	Lipase/lipooxygenase%2C PLAT/LH2 family protein (AHRD V3.3 *** AT1G55280.2)	TRUE
Solyc09g075020.3.1	1.00451	0.000427599	0.00371453	ABC transporter C family member 4 (AHRD V3.3 *** A0A2G2ZW52_CAPAN)	TRUE
Solyc01g008730.3.1	1.00409	4.23651e-05	0.00051372	BZIP transcription factor (AHRD V3.3 *** E9N3N2_9POAL)	TRUE
Solyc07g043310.3.1	1.00083	1.3276e-07	3.16513e-06	Gamma aminobutyrate transaminase isoform 1	FALSE
Solyc11g017000.2.1	1.00008	0.00457445	0.0259456	DUF668 domain-containing protein/DUF3475 domain-containing protein (AHRD V3.3 *** A0A1Q3CI27_CEPFO)	TRUE

## Sheet: DOWN
Supplemental Table S4. Down-regulated DEGs of E3H30m vs W3H30m in shoots (log2 fold change ≦ -1.0, p_value < 0.05, p_adj < 0.05).
Geneid	log2FoldChange	p_value	p_adj	Annotation
Solyc02g065090.4.1	-4.03621	1.88741e-08	5.45232e-07	Patatin (AHRD V3.3 *** A0A2G2XCC6_CAPBA)
Solyc12g088850.1.1	-3.75648	0.00305825	0.018842	EF-hand domain (AHRD V3.3 *** A0A200QZ93_9MAGN)
Solyc12g089190.1.1	-3.72712	0.00102922	0.00778668	Protein RADIALIS-like 6 (AHRD V3.3 *** A0A1U8ERP9_CAPAN)
Solyc10g054040.3.1	-3.69273	0.00239851	0.015487	26S proteasome regulatory subunit (AHRD V3.3 *** A8IR41_CHLRE)
Solyc01g107370.3.1	-3.65558	2.22642e-07	5.0449e-06	Gibberellin-regulated protein (AHRD V3.3 *** K0E174_POPTO)
Solyc12g049380.3.1	-3.60367	0.00181987	0.0124637	hypothetical protein (AHRD V3.3 *** AT1G72490.2)
Solyc04g011810.1.1	-3.57635	0.00122665	0.00903259	Glutaredoxin (AHRD V3.3 *** A0A1L7MRR3_SOLPI)
Solyc04g053000.1.1	-3.56925	0.00246964	0.0158622	Auxin-responsive protein SAUR24 (AHRD V3.3 *** A0A1U8FJX4_CAPAN)
Solyc02g069060.4.1	-3.53629	0.00494008	0.0274906	Phloem protein 2-like (AHRD V3.3 *** A0A200QPN3_9MAGN)
Solyc02g082490.4.1	-3.53109	0.000151994	0.00155794	Protein phosphatase 2C family protein (AHRD V3.3 *** A0A2U1LH09_ARTAN)
Solyc07g049565.1.1	-3.45881	0.00374093	0.022088	Unknown protein
Solyc04g025880.4.1	-3.41445	0.0024216	0.015592	Potassium transporter (AHRD V3.3 *** A0A2G2VML6_CAPBA)
Solyc10g009540.1.1	-3.2581	0.00512086	0.0282647	Bifunctional polymyxin resistance protein, ArnA (AHRD V3.3 *** A0A2U1QHU7_ARTAN)
Solyc00g500194.1.1	-3.25319	0.00311913	0.0191269	Cytochrome c biogenesis protein CcsA (AHRD V3.3 *-* A0A1U8QCK2_CAPAN)
Solyc07g049680.4.1	-3.18402	0.000284857	0.00263312	Condensin complex subunit 2 (AHRD V3.3 *** A0A2G2WDS5_CAPBA)
Solyc06g061200.1.1	-3.10266	9.9039e-12	5.5553e-10	glycine-rich protein 1
Solyc12g055970.3.1	-3.0631	0.00052667	0.00443606	Endoglucanase (AHRD V3.3 *** A0A2G3B3J7_CAPCH)
Solyc10g047530.2.1	-3.02717	0.00699508	0.0360012	Phototropic-responsive NPH3 family protein (AHRD V3.3 *** A0A2U1PJR6_ARTAN)
Solyc06g007140.4.1	-3.01559	0.00286614	0.0178753	Omega-3 fatty acid desaturase (AHRD V3.3 *** A9LNM9_SOLLC)
Solyc07g053530.1.1	-3.01253	0.00973905	0.0465225	Fasciclin-like arabinogalactan protein 9 (AHRD V3.3 *** A0A1U8HBV4_CAPAN)
Solyc09g007860.4.1	-2.99356	0.0101457	0.0480157	Calcium-dependent lipid-binding (CaLB domain) family protein (AHRD V3.3 *** A0A1P8BD17_ARATH)
Solyc10g007490.2.1	-2.98413	0.00862402	0.0422219	transmembrane protein (AHRD V3.3 *** AT3G14760.1)
Solyc02g082150.1.1	-2.94718	0.00864415	0.0422639	BnaCnng18720D protein (AHRD V3.3 *** A0A078IGP5_BRANA)
Solyc07g017760.1.1	-2.85951	0.00260118	0.0165387	Pentatricopeptide repeat (AHRD V3.3 *** A0A200QZ38_9MAGN)
Solyc01g067460.3.1	-2.85339	0.001596	0.0112464	monothiol glutaredoxin-S2-like (AHRD V3.3 *** A0A1U7VLQ4_NICSY)
Solyc08g077360.3.1	-2.83682	0.00394916	0.0230349	Dynamin (AHRD V3.3 *** E5GB64_CUCME)
Solyc02g085940.4.1	-2.8191	0.000650856	0.00528958	Ribulose bisphosphate carboxylase small chain (AHRD V3.3 *** A0A2G2XBI7_CAPBA)
Solyc11g071350.1.1	-2.81456	0.00209791	0.0139652	Aluminum-activated malate transporter (AHRD V3.3 *** A0A200Q9N0_9MAGN)
Solyc01g109470.3.1	-2.79086	0.000971143	0.00740999	BURP domain-containing protein (AHRD V3.3 *** A0A1Q3C0F5_CEPFO)
Solyc01g110720.2.1	-2.72921	0.00351728	0.0210324	Auxin-responsive protein SAUR21 (AHRD V3.3 *** A0A2G3BWF1_CAPCH)
Solyc01g005370.3.1	-2.69939	0.00553339	0.0300962	Calcium-dependent protein kinase (AHRD V3.3 *-* CDPK_DAUCA)
Solyc07g053820.3.1	-2.65755	0.00415214	0.0240196	Mitotic checkpoint serine/threonine-protein kinase BUB1 (AHRD V3.3 *** A0A1U8HBH8_CAPAN)
Solyc08g013910.4.1	-2.65387	4.81669e-07	1.01123e-05	Protein plant cadmium resistance 2 (AHRD V3.3 *-* A0A1J6HUT4_NICAT)
Solyc05g009120.3.1	-2.65156	9.18056e-08	2.25035e-06	Core-2 i-branching beta-n-acetylglucosaminyltransferase family protein (AHRD V3.3 *** A0A2K3MN76_TRIPR)
Solyc08g079150.1.1	-2.62874	0.00702333	0.036078	Auxin-responsive protein SAUR32 (AHRD V3.3 *** A0A2G2XKY1_CAPBA)
Solyc03g110980.4.1	-2.62345	2.31401e-06	3.98813e-05	hypothetical protein (AHRD V3.3 *** AT3G48490.1)
Solyc03g150117.1.1	-2.61411	0.00019871	0.00194832	Retrovirus-related Pol polyprotein from transposon TNT 1-94 (AHRD V3.3 *-* A0A1J3HZ90_NOCCA)
Solyc03g123410.1.1	-2.60733	5.96282e-17	9.73537e-15	Germin-like protein 1 (AHRD V3.3 *** A0A1U8G802_CAPAN)
Solyc12g042780.2.1	-2.58473	0.00174633	0.0120549	Cupredoxin (AHRD V3.3 *-* A0A2U1MB64_ARTAN)
Solyc12g011023.1.1	-2.55635	4.43918e-17	7.44723e-15	Xyloglucan endotransglucosylase/hydrolase (AHRD V3.3 *** Q6RHX7_SOLLC)
Solyc01g060410.4.1	-2.41565	0.00576479	0.0310594	GPI-anchored adhesin-like protein (AHRD V3.3 *** Q9M2F2_ARATH)
Solyc03g044220.1.1	-2.3813	0.0079591	0.0398758	F-box protein (AHRD V3.3 *** A0A2G2XGV7_CAPBA)
Solyc07g008205.1.1	-2.37053	0.00465656	0.0263214	EPIDERMAL PATTERNING FACTOR-like protein 8 (AHRD V3.3 *** A0A2I4H6E6_9ROSI),Pfam:PF17181
Solyc02g085490.2.1	-2.35654	0.00770396	0.0388727	DUF620 domain-containing protein (AHRD V3.3 *** A0A1Q3DK00_CEPFO)
Solyc04g076190.1.1	-2.34754	8.22699e-07	1.61242e-05	Eukaryotic aspartyl protease family protein (AHRD V3.3 *** F4K5B9_ARATH)
Solyc10g008060.4.1	-2.34496	0.00495425	0.027536	DUF455 domain-containing protein (AHRD V3.3 *** A0A1Q3AWN5_CEPFO)
Solyc07g052680.1.1	-2.31303	0.00830209	0.0410969	lysine-rich arabinogalactan protein 19 (AHRD V3.3 *-* XP_010324089.1)
Solyc02g083765.1.1	-2.31156	0.0100667	0.0477632	Phosphotransferases/inositol or phosphatidylinositol kinase (AHRD V3.3 *-* F4JPL2_ARATH)
Solyc04g076370.4.1	-2.29955	0.00248351	0.015907	Pentatricopeptide repeat-containing protein, mitochondrial (AHRD V3.3 *** A0A2G2X056_CAPBA)
Solyc04g079910.4.1	-2.28289	0.000616601	0.00504707	Calcium uniporter protein 4, mitochondrial (AHRD V3.3 *** A0A2G3CPZ7_CAPCH)
Solyc03g111530.4.1	-2.27734	0.00166697	0.0116334	Cysteine-rich receptor-like protein kinase (AHRD V3.3 *** A0A2K3LJD5_TRIPR)
Solyc08g005760.1.1	-2.25352	0.000742459	0.00591831	Alcohol acyl transferase (AHRD V3.3 *** Q6QLX4_SOLLC)
Solyc07g041720.1.1	-2.23233	1.87637e-12	1.19969e-10	Germin-like protein (AHRD V3.3 *** S8E4K0_9LAMI)
Solyc07g041920.4.1	-2.22636	0.00018395	0.00182559	Cysteine protease (AHRD V3.3 *** Q9LRI2_TOBAC)
Solyc06g150135.1.1	-2.20365	0.00383192	0.0225162	Unknown protein
Solyc12g009650.2.1	-2.20011	1.13945e-14	1.1574e-12	Sl proline-rich protein
Solyc01g099630.4.1	-2.19613	1.41406e-34	1.29287e-30	xyloglucan endotransglucosylase-hydrolase 1
Solyc02g093700.3.1	-2.17388	0.00153072	0.0108871	Cystinosin-like protein (AHRD V3.3 *** A0A1U8FR03_CAPAN)
Solyc06g074000.1.1	-2.16211	4.28609e-07	9.08174e-06	Eukaryotic aspartyl protease family protein, putative (AHRD V3.3 *** A0A061GZN2_THECC)
Solyc07g025140.4.1	-2.16	0.00803826	0.0400948	Transducin/WD40 repeat-like superfamily protein (AHRD V3.3 *** A0A2U1PWP8_ARTAN)
Solyc08g067160.3.1	-2.1515	3.4928e-07	7.60279e-06	Alpha/beta-Hydrolases superfamily protein (AHRD V3.3 *** A0A2U1QI56_ARTAN)
Solyc12g011030.3.1	-2.1505	4.26053e-08	1.14068e-06	xyloglucan endotransglucosylase-hydrolase 9
Solyc01g102280.3.1	-2.14097	0.00130628	0.00952796	Unknown protein
Solyc03g121900.1.1	-2.12905	1.57099e-07	3.66418e-06	Bifunctional inhibitor/plant lipid transfer protein/seed storage helical domain containing protein (AHRD V3.3 *** A0A2P5DNS6_PARAD)
Solyc02g081450.2.1	-2.11075	0.00384071	0.0225498	Late embryogenesis abundant (LEA) hydroxyproline-rich glycoprotein family (AHRD V3.3 *-* Q9SLI0_ARATH)
Solyc04g050730.3.1	-2.09623	4.07463e-17	6.96343e-15	GDSL esterase/lipase (AHRD V3.3 *** A0A2R6PKD3_ACTCH)
Solyc09g059240.3.1	-2.08691	2.93452e-07	6.52805e-06	Cytochrome P450 (AHRD V3.3 *** A0A2U1Q1Z2_ARTAN)
Solyc02g085145.1.1	-2.08042	1.90339e-06	3.36935e-05	Transcription factor RADIALIS (AHRD V3.3 *** A0A1U8FSL3_CAPAN)
Solyc04g058080.3.1	-2.07119	0.00863156	0.0422344	Glucan endo-1,3-beta-glucosidase (AHRD V3.3 *** A0A2G3CL60_CAPCH)
Solyc02g090540.4.1	-2.06044	2.38903e-10	1.00427e-08	Glucose/ribitol dehydrogenase (AHRD V3.3 *** A0A2U1NV71_ARTAN)
Solyc10g009060.1.1	-2.0472	0.0098749	0.0470241	MAP kinase kinase kinase 72
Solyc04g026110.4.1	-2.04614	0.00223502	0.0146821	Disease resistance protein (AHRD V3.3 *** A0A200PUC6_9MAGN)
Solyc07g008590.1.1	-2.04344	0.00254358	0.0162119	receptor-like protein 12 (AHRD V3.3 *** A0A1U8F5D2_CAPAN)
Solyc06g065970.1.1	-2.04323	2.51353e-18	6.04768e-16	Bifunctional inhibitor/lipid-transfer protein/seed storage 2S albumin superfamily protein (AHRD V3.3 *** A0A2U1PU47_ARTAN)
Solyc03g117550.1.1	-2.04065	0.00146198	0.0105104	Receptor-like protein kinase (AHRD V3.3 *** A0A2K3MXF3_TRIPR)
Solyc01g094990.2.1	-2.03208	0.00507981	0.0281057	DUF604 domain-containing protein (AHRD V3.3 *** A0A1Q3C751_CEPFO)
Solyc11g073030.1.1	-2.03078	0.00262356	0.0166347	Dirigent protein (AHRD V3.3 *** K4DB09_SOLLC)
Solyc02g072030.1.1	-2.02194	0.00420141	0.0242586	ovate family protein 5
Solyc06g075650.3.1	-2.0204	1.48116e-16	2.27601e-14	tonoplast intrinsic protein 1.2
Solyc08g079850.3.1	-2.01014	9.5428e-07	1.83491e-05	Subtilisin-like protease (AHRD V3.3 *** Q9LWA3_SOLLC)
Solyc09g074990.4.1	-2.0031	0.00430962	0.0247506	DNA mismatch repair protein PMS1 (AHRD V3.3 *** A0A1U8FBY8_CAPAN)
Solyc04g074450.1.1	-1.99865	1.83119e-20	7.62773e-18	Protein EXORDIUM-like 1 (AHRD V3.3 *** A0A2G2ZQI6_CAPAN)
Solyc06g073690.2.1	-1.99015	3.17339e-05	0.000399097	Transducin/WD40 repeat-like superfamily protein (AHRD V3.3 *-* A0A2U1PDP2_ARTAN)
Solyc03g110930.3.1	-1.98442	0.0106215	0.0497756	30S ribosomal protein S21, chloroplastic (AHRD V3.3 *-* A0A2G3CY41_CAPCH)
Solyc03g096760.1.1	-1.96723	6.4284e-10	2.51713e-08	Protein RESPONSE TO LOW SULFUR 2 (AHRD V3.3 *-* LSU2_ARATH)
Solyc02g078720.4.1	-1.96394	0.000992893	0.00755243	multidrug resistance protein (AHRD V3.3 *** AT1G58007.4)
Solyc03g123620.4.1	-1.95958	3.32167e-14	2.99212e-12	Pectinesterase (AHRD V3.3 *** A0A2G3D1E1_CAPCH)
Solyc05g012900.4.1	-1.95328	0.000989617	0.00753378	JJH-R-like protein
Solyc06g073820.3.1	-1.9516	0.00473062	0.026629	Ubiquitin carboxyl-terminal hydrolase 12 (AHRD V3.3 *** A0A2G2XWY4_CAPAN)
Solyc04g150172.1.1	-1.95115	8.99912e-05	0.000980679	Protein RADIALIS-like 6 (AHRD V3.3 *** A0A1U8GJH9_CAPAN)
Solyc10g085950.2.1	-1.94743	7.82994e-05	0.000869328	ABC transporter protein (AHRD V3.3 *** A0A1L4BHU2_ORYSI)
Solyc03g124110.2.1	-1.94601	3.26674e-05	0.000408868	Dehydration-responsive element-binding transcription factor (AHRD V3.3 *** A0A1S6M2D0_9CARY)
Solyc01g111660.4.1	-1.94493	2.97698e-20	1.13411e-17	plasma membrane intrinsic protein 2.8
Solyc03g096290.3.1	-1.93329	2.0378e-17	3.72631e-15	plasma membrane intrinsic protein 1.7
Solyc02g092110.3.1	-1.91623	5.68233e-17	9.38464e-15	Phytosulfokines 3 (AHRD V3.3 *** A0A2I0WHI7_9ASPA)
Solyc03g117750.3.1	-1.91292	0.0036284	0.0215629	Pectin lyase-like superfamily protein (AHRD V3.3 *** F4IE17_ARATH)
Solyc01g110600.2.1	-1.90582	0.00521005	0.0286545	Unknown protein
Solyc01g100980.4.1	-1.90312	0.00292928	0.0181884	Pectin lyase-like superfamily protein (AHRD V3.3 *** A0A2U1LK87_ARTAN)
Solyc06g007890.3.1	-1.89743	4.80769e-12	2.83331e-10	Gibberellin regulated protein (AHRD V3.3 *** A0A2U1LHI0_ARTAN)
Solyc11g066390.2.1	-1.89371	5.48398e-13	3.96364e-11	superoxide dismutase 3
Solyc05g013680.3.1	-1.89199	0.00615704	0.0327861	Gdsl esterase/lipase (AHRD V3.3 *** A0A2P4H5E8_QUESU)
Solyc04g017720.3.1	-1.88793	2.89609e-10	1.20086e-08	Gibberellin regulated protein (AHRD V3.3 *** A0A2U1PE48_ARTAN)
Solyc10g052530.1.1	-1.8871	0.00027302	0.00254457	Small auxin up-regulated RNA72
Solyc06g066700.1.1	-1.88266	2.45425e-27	4.9865e-24	serine-rich protein-like protein (AHRD V3.3 --* AT3G13227.1)
Solyc01g098080.3.1	-1.87953	2.05789e-06	3.58386e-05	BY-2 kinesin-like protein 5 (AHRD V3.3 *** Q9AVP5_TOBAC)
Solyc10g044510.2.1	-1.8785	0.00445261	0.0254042	MLO-like protein (AHRD V3.3 *** K4CZH6_SOLLC)
Solyc07g062680.3.1	-1.87838	0.00694467	0.0358932	cycloidea
Solyc02g075620.4.1	-1.87815	2.73556e-05	0.000350674	Pectinesterase (AHRD V3.3 *** A0A2G3D7Y1_CAPCH)
Solyc08g076883.1.1	-1.87752	1.23975e-11	6.80786e-10	Unknown protein
Solyc04g005660.4.1	-1.85596	0.000274174	0.00255402	transcription factor PRE6-like (AHRD V3.3 *** A0A2I4HLH0_9ROSI)
Solyc10g074440.2.1	-1.85475	5.06157e-08	1.33366e-06	Chitinase (AHRD V3.3 *** B9VRK7_CAPAN)
Solyc03g026120.3.1	-1.8522	4.83854e-07	1.01233e-05	S-adenosyl-L-methionine-dependent methyltransferases superfamily protein (AHRD V3.3 *** A0A2U1NM08_ARTAN)
Solyc02g092250.3.1	-1.84906	0.00983249	0.0468465	Cytochrome (AHRD V3.3 *** A0A2G3ABE0_CAPAN)
Solyc06g062980.3.1	-1.84597	1.15841e-11	6.39959e-10	U6 snRNA-associated Sm-like protein LSm1 (AHRD V3.3 *** A0A2G3C8I8_CAPCH)
Solyc08g075300.4.1	-1.84219	1.07584e-05	0.000157635	Protein decapping 5 (AHRD V3.3 *-* A0A2G3B6L4_CAPCH)
Solyc07g005090.4.1	-1.83875	0.000849127	0.00661927	Glycosyl hydrolase family protein with chitinase insertion domain-containing protein (AHRD V3.3 *** A0A2U1N1A8_ARTAN)
Solyc12g006020.1.1	-1.83601	7.88529e-05	0.000873352	Receptor protein kinase, putative (AHRD V3.3 *** B9SKP2_RICCO)
Solyc06g069730.3.1	-1.83011	3.31146e-09	1.12136e-07	Chlorophyll a-b binding protein, chloroplastic (AHRD V3.3 *** A0A1U8GPF4_CAPAN)
Solyc04g071960.3.1	-1.82548	1.57248e-10	6.89554e-09	NAD(P)-binding Rossmann-fold superfamily protein (AHRD V3.3 *** A0A2U1QER6_ARTAN),Pfam:PF13561
Solyc07g053540.1.1	-1.81762	5.07742e-18	1.0923e-15	Fasciclin-like arabinogalactan protein 9 (AHRD V3.3 *** A0A1U8HBV4_CAPAN)
Solyc07g009220.2.1	-1.81147	4.85294e-05	0.00057774	Pentatricopeptide repeat-containing protein (AHRD V3.3 *** A0A2G3CTG5_CAPCH)
Solyc12g055810.1.1	-1.79818	0.009955	0.0473439	P-loop containing nucleoside triphosphate hydrolases superfamily protein (AHRD V3.3 *** A0A1P8B3B9_ARATH)
Solyc08g005930.1.1	-1.78131	4.2406e-05	0.000513875	F-box/kelch-repeat protein SKIP25 (AHRD V3.3 *** A0A2G2XM52_CAPBA)
Solyc06g005230.3.1	-1.7811	2.33737e-09	8.20367e-08	Receptor-like protein kinase THESEUS 1 (AHRD V3.3 *** A0A2G2WHH2_CAPBA)
Solyc02g087190.1.1	-1.77711	1.39021e-16	2.15435e-14	Peroxidase (AHRD V3.3 *** K4BBM6_SOLLC)
Solyc05g054750.3.1	-1.77705	3.88774e-07	8.30506e-06	Plant protein 1589 of Uncharacterized protein function (AHRD V3.3 *** A0A061FM19_THECC)
Solyc02g076980.5.1	-1.77662	0.00205859	0.0137485	#N/A
Solyc01g090965.1.1	-1.76788	4.69643e-18	1.03469e-15	Bifunctional inhibitor/lipid-transfer protein/seed storage 2S albumin superfamily protein (AHRD V3.3 *** Q9FJS1_ARATH)
Solyc06g053370.3.1	-1.76699	7.04537e-08	1.76e-06	Rhomboid protein (AHRD V3.3 *** E5GC88_CUCME)
Solyc02g087850.1.1	-1.76603	5.2498e-08	1.3714e-06	Glutaredoxin (AHRD V3.3 *** A0A200QSA1_9MAGN)
Solyc09g097860.4.1	-1.76192	0.000381214	0.00336595	Kinesin-like protein KIN12B (AHRD V3.3 *** A0A2G2YQB5_CAPAN)
Solyc03g120040.3.1	-1.75849	0.000799018	0.00628759	DUF642 domain-containing protein (AHRD V3.3 *** A0A1Q3BMB3_CEPFO)
Solyc01g094660.3.1	-1.7531	1.08102e-14	1.11054e-12	Protein kinase domain (AHRD V3.3 *** A0A200QU61_9MAGN)
Solyc01g079940.4.1	-1.7454	0.000388802	0.00342468	Eukaryotic aspartyl protease family protein (AHRD V3.3 *** A0A2U1KXX4_ARTAN)
Solyc01g007990.4.1	-1.74175	0.00289146	0.0180147	Cysteine-rich receptor-like protein kinase 2 (AHRD V3.3 *** A0A2G2XSC5_CAPBA)
Solyc04g076450.1.1	-1.73873	0.00441029	0.0252178	LRR receptor-like serine/threonine-protein kinase GSO1 (AHRD V3.3 *** A0A1U8F0D9_CAPAN)
Solyc03g006050.4.1	-1.72761	1.37132e-14	1.34817e-12	receptor-like protein 51 (AHRD V3.3 *-* A0A2I4GVM3_9ROSI)
Solyc01g095290.4.1	-1.72489	2.81489e-06	4.75065e-05	Glycosyltransferase (AHRD V3.3 *** A0A1U8DT12_CAPAN)
Solyc03g113760.3.1	-1.72151	0.00862933	0.0422344	E2F transcription factor-like E2FE (AHRD V3.3 *** A0A1U8FXH9_CAPAN)
Solyc01g091850.3.1	-1.71683	0.00479533	0.0268991	Ccc1 family (AHRD V3.3 *** A0A2U1QPJ4_ARTAN)
Solyc02g092120.3.1	-1.71431	0.00362116	0.0215268	phytosulfokines-like (AHRD V3.3 *** A0A2I4HMI7_9ROSI)
Solyc12g009840.2.1	-1.70875	0.000199352	0.00195251	Pyrophosphate-energized vacuolar membrane proton pump (AHRD V3.3 *** A0A2G3BP86_CAPCH)
Solyc03g119070.2.1	-1.7016	0.00800231	0.0399809	exonuclease 1 (AHRD V3.3 *** A0A2I4FDC1_9ROSI)
Solyc03g117560.3.1	-1.67051	2.00025e-10	8.52602e-09	Plastocyanin-like (AHRD V3.3 *** A0A200PSX2_9MAGN)
Solyc06g054100.2.1	-1.67024	1.61137e-05	0.000222717	Folate-biopterin transporter 1, chloroplastic (AHRD V3.3 *-* A0A1U8H2J4_CAPAN)
Solyc04g082320.3.1	-1.66569	0.00378112	0.0223037	Pentatricopeptide repeat (AHRD V3.3 *** A0A200QNE8_9MAGN)
Solyc08g079870.3.1	-1.66559	0.000890944	0.00687708	subtilisin
Solyc08g081040.3.1	-1.66196	0.000238827	0.0022734	RNAse P, Rpr2/Rpp21 subunit (AHRD V3.3 *-* A0A2U1KVN4_ARTAN)
Solyc07g062710.4.1	-1.64638	1.54666e-05	0.000215238	Basic-leucine zipper (BZIP) transcription factor family protein (AHRD V3.3 *-* A0A1I9LST2_ARATH)
Solyc06g074310.4.1	-1.64319	0.00604147	0.0322458	Transmembrane 9 superfamily member (AHRD V3.3 *** A0A2G2VAU9_CAPBA)
Solyc01g067400.3.1	-1.6393	6.85636e-05	0.00077873	Serine/threonine-protein kinase PBS1 (AHRD V3.3 *** A0A2G2XQZ3_CAPBA)
Solyc02g079940.3.1	-1.63668	0.00150447	0.0107476	Transmembrane protein, putative (DUF1218) (AHRD V3.3 *** A0A1P8B4W6_ARATH)
Solyc04g007290.4.1	-1.63285	0.0068233	0.0353558	DUF639 domain-containing protein (AHRD V3.3 *** A0A1Q3DGQ0_CEPFO)
Solyc03g032190.3.1	-1.62838	0.00420422	0.0242672	cyclinB2_7
Solyc10g080070.3.1	-1.61946	0.00447255	0.0254782	Ribosome biogenesis GTPase A (AHRD V3.3 *-* A0A1J3EQ97_NOCCA)
Solyc05g005540.4.1	-1.61788	3.23327e-08	8.8641e-07	Polygalacturonase-1 non-catalytic subunit beta (AHRD V3.3 *** GP1_SOLLC)
Solyc02g071580.4.1	-1.61751	1.09189e-12	7.287e-11	Subtilisin-like protease SBT5.3 (AHRD V3.3 *** A0A2G2XF91_CAPBA)
Solyc01g010710.4.1	-1.61425	0.00111295	0.00832712	Carboxypeptidase (AHRD V3.3 *** A0A2I4FWA2_9ROSI)
Solyc06g054150.1.1	-1.61227	0.00798445	0.0399463	Heat shock protein (AHRD V3.3 *** Q8VY73_ARATH)
Solyc07g063560.4.1	-1.61089	0.00515831	0.0284368	Cotton fiber (DUF761) (AHRD V3.3 *** F4HTI9_ARATH)
Solyc02g083610.4.1	-1.60926	0.00231395	0.0150794	Ras domain-containing protein/DUF632 domain-containing protein/DUF630 domain-containing protein (AHRD V3.3 *** A0A1Q3BAN2_CEPFO)
Solyc02g080220.3.1	-1.60905	4.31458e-13	3.19419e-11	Pectinesterase (AHRD V3.3 *** A0A2G2VBJ7_CAPBA)
Solyc02g085220.4.1	-1.59855	7.67253e-05	0.000856532	Vacuolar sorting protein 39 (AHRD V3.3 *** A0A2U1PI44_ARTAN)
Solyc02g070950.1.1	-1.58986	3.05382e-08	8.43537e-07	Chlorophyll a-b binding protein, chloroplastic (AHRD V3.3 *** A0A2G3A7J8_CAPAN)
Solyc08g082540.3.1	-1.58398	5.23662e-05	0.000615799	Galactose-binding domain-like protein (AHRD V3.3 *** A0A2U1P2Q8_ARTAN)
Solyc07g042025.1.1	-1.57908	0.00423517	0.024415	Unknown protein
Solyc06g051130.1.1	-1.57815	0.0096833	0.0462925	HXXXD-type acyl-transferase family protein (AHRD V3.3 *** Q9XEF2_ARATH)
Solyc04g049750.3.1	-1.57695	0.00869438	0.0424414	Unknown protein
Solyc06g072240.1.1	-1.57516	0.00236647	0.0153615	Histone H4 (AHRD V3.3 *-* F2E7L1_HORVV)
Solyc07g032490.3.1	-1.56966	1.75706e-10	7.57773e-09	Major facilitator superfamily protein (AHRD V3.3 *** A0A1P8AZ04_ARATH)
Solyc12g094440.2.1	-1.56517	0.000434743	0.0037672	High mobility group B protein 9 (AHRD V3.3 *** A0A2G2YA23_CAPAN)
Solyc03g119990.4.1	-1.55853	0.00611277	0.0325789	Alpha/beta-Hydrolases superfamily protein (AHRD V3.3 *** A0A2U1NI49_ARTAN)
Solyc02g083880.3.1	-1.55568	4.54505e-05	0.000545704	Gibberellin-regulated protein 3 (AHRD V3.3 *** A0A1U8FMR2_CAPAN)
Solyc08g066610.3.1	-1.5536	1.94364e-15	2.26379e-13	EPIDERMAL PATTERNING FACTOR-like protein 9 (AHRD V3.3 *** A0A2G2WD44_CAPBA)
Solyc02g070980.1.1	-1.55094	1.94007e-07	4.46661e-06	Chlorophyll a-b binding protein, chloroplastic (AHRD V3.3 *-* A0A2G3A7J8_CAPAN)
Solyc06g068910.3.1	-1.54043	0.00113628	0.00847387	Receptor-like kinase 1 (AHRD V3.3 *** A0A061FVY1_THECC)
Solyc05g005760.4.1	-1.53499	4.53643e-08	1.20923e-06	NHL domain-containing protein (AHRD V3.3 *** A0A2K3PAQ7_TRIPR)
Solyc02g070385.1.1	-1.53256	0.00849681	0.0417781	Unknown protein
Solyc11g010890.3.1	-1.53097	2.58267e-17	4.58511e-15	Exostosin-like (AHRD V3.3 *** A0A200PNJ6_9MAGN)
Solyc01g067510.3.1	-1.5226	1.05322e-15	1.3337e-13	receptor-like protein kinase FERONIA (AHRD V3.3 *** A0A2I4F2T3_9ROSI)
Solyc01g079570.3.1	-1.5167	0.00554034	0.0301184	Beta-D-xylosidase 1 (AHRD V3.3 *** A0A1U8DZL0_CAPAN)
Solyc07g052240.3.1	-1.51228	0.000344888	0.00309908	L-ascorbate oxidase-like protein (AHRD V3.3 *** A0A2G2V9R9_CAPBA)
Solyc07g006710.2.1	-1.50858	3.91983e-05	0.000479772	Pathogenesis-related protein PR-1 (AHRD V3.3 *** A0A2G3BX31_CAPCH)
Solyc02g091920.3.1	-1.50732	5.42835e-28	1.24079e-24	xyloglucan endotransglucosylase-hydrolase 7
Solyc07g056560.3.1	-1.50616	4.91488e-05	0.000583594	Unknown protein
Solyc12g013710.2.1	-1.50518	7.77303e-09	2.40504e-07	light dependent NADH:protochlorophyllide oxidoreductase 1
Solyc06g082610.4.1	-1.50436	5.5882e-08	1.45357e-06	Receptor-like kinase (AHRD V3.3 *** G7K0V8_MEDTR)
Solyc03g097760.2.1	-1.5038	5.26341e-06	8.26862e-05	Sterile alpha motif domain (AHRD V3.3 *** A0A200R3W2_9MAGN)
Solyc04g074410.2.1	-1.49758	3.3295e-20	1.21766e-17	Protein EXORDIUM-like 1 (AHRD V3.3 *** A0A2G2ZQI6_CAPAN)
Solyc12g008680.3.1	-1.49555	9.22416e-20	3.24371e-17	Unknown protein
Solyc03g120070.4.1	-1.49477	0.0049717	0.0276012	Pentatricopeptide repeat (AHRD V3.3 *** A0A200QNZ8_9MAGN)
Solyc12g094550.2.1	-1.4912	0.00250685	0.0160057	At1g76250 (AHRD V3.3 *** Q8GX25_ARATH)
Solyc06g069000.3.1	-1.48714	1.66641e-09	6.03406e-08	GPI-anchored protein (AHRD V3.3 *** AT3G18050.1)
Solyc01g098800.4.1	-1.48702	6.94124e-06	0.000106272	Cation/calcium exchanger 5 (AHRD V3.3 *** A0A2G3BUD8_CAPCH)
Solyc02g070970.1.1	-1.48506	1.11894e-06	2.11812e-05	Chlorophyll a-b binding protein, chloroplastic (AHRD V3.3 *** A0A2G3A7J8_CAPAN)
Solyc06g060640.1.1	-1.48451	3.22927e-26	4.9904e-23	Bifunctional inhibitor/lipid-transfer protein/seed storage 2S albumin superfamily protein (AHRD V3.3 *** A0A2U1PU47_ARTAN)
Solyc05g005560.4.1	-1.48417	2.70986e-18	6.3023e-16	polygalacturonase isoenzyme 1 beta subunit
Solyc08g067530.1.1	-1.48222	1.41057e-09	5.18988e-08	Non-specific lipid-transfer protein (AHRD V3.3 *** K4CLX9_SOLLC)
Solyc02g086740.1.1	-1.47857	4.2633e-12	2.55602e-10	50S ribosomal protein L12, chloroplastic (AHRD V3.3 *** A0A2G3D9E1_CAPCH)
Solyc08g005960.2.1	-1.47641	0.000971021	0.00740999	Bifunctional inhibitor/lipid-transfer protein/seed storage 2S albumin superfamily protein (AHRD V3.3 *** A0A2U1PU47_ARTAN)
Solyc12g009070.1.1	-1.47628	1.33174e-11	7.20477e-10	Unknown protein
Solyc08g005000.4.1	-1.46636	4.27579e-05	0.000517452	Glucan endo-1,3-beta-glucosidase 3 (AHRD V3.3 *** A0A1J3GQV0_NOCCA)
Solyc02g070990.1.1	-1.46455	3.48933e-06	5.73794e-05	Chlorophyll a-b binding protein, chloroplastic (AHRD V3.3 *** A0A2G3A7J8_CAPAN)
Solyc11g005390.3.1	-1.46371	0.00445945	0.0254194	transmembrane protein (AHRD V3.3 *** AT3G18800.1)
Solyc01g088620.3.1	-1.46367	2.49879e-13	1.91987e-11	Ferredoxin-like protein (AHRD V3.3 *** Q8GYG8_ARATH)
Solyc01g081250.3.1	-1.46285	5.26234e-05	0.000617632	Glutathione S-transferase (AHRD V3.3 *** A0A200PVK3_9MAGN)
Solyc06g008368.1.1	-1.45366	0.00622004	0.0330255	Plant resistance protein (AHRD V3.3 *-* O81136_SOLLC)
Solyc10g079350.3.1	-1.44981	0.000247261	0.00234027	Glycosyltransferase (AHRD V3.3 *** A0A0A1WCT7_NICAT)
Solyc01g111330.4.1	-1.4492	1.06998e-05	0.000157027	Thaumatin-like protein 1 (AHRD V3.3 *** A0A2G3BWI2_CAPCH)
Solyc06g062580.3.1	-1.44763	0.000118761	0.00125096	Beta-galactosidase (AHRD V3.3 *** A0A2G3C8Y3_CAPCH)
Solyc03g005200.3.1	-1.44299	0.0074239	0.0377552	Non-specific lipid-transfer protein-like protein (AHRD V3.3 *** A0A1J6K9J7_NICAT)
Solyc02g077110.3.1	-1.44156	0.00601754	0.0321369	Phospholipase A1-II 1 (AHRD V3.3 *** A0A2G2XE87_CAPBA)
Solyc06g006100.3.1	-1.44107	0.000607998	0.0050034	Anthranilate synthase (AHRD V3.3 *** A0A2U1KR52_ARTAN)
Solyc04g011700.2.1	-1.44027	0.00461632	0.0261365	Mitochondrial transcription termination factor family protein (AHRD V3.3 *** Q9SD94_ARATH)
Solyc07g062600.4.1	-1.43707	8.08799e-05	0.000893638	Acyl-CoA N-acyltransferase with RING/FYVE/PHD-type zinc finger protein (AHRD V3.3 *-* A0A1I9LNP0_ARATH)
Solyc02g071000.1.1	-1.43631	2.21767e-06	3.84019e-05	Chlorophyll a-b binding protein, chloroplastic (AHRD V3.3 *** A0A2G3A7J8_CAPAN)
Solyc12g044330.2.1	-1.43416	3.07286e-15	3.46853e-13	tonoplast intrinsic protein 2.1
Solyc03g118310.4.1	-1.43138	0.000881443	0.00682391	bHLH transcription factor 083
Solyc09g075210.3.1	-1.42904	5.20817e-07	1.07612e-05	Late embryogenesis abundant protein Lea5 (AHRD V3.3 *** A0A1J3JXG8_NOCCA)
Solyc02g090360.3.1	-1.42823	1.32717e-11	7.20137e-10	L-ascorbate oxidase-like protein (AHRD V3.3 *** A0A1U8FPI3_CAPAN)
Solyc09g090300.3.1	-1.42628	0.00840931	0.0415153	dCTP pyrophosphatase-like protein (AHRD V3.3 *** Q9LSW0_ARATH)
Solyc10g054870.3.1	-1.42613	7.67e-23	5.19458e-20	Triosephosphate isomerase (AHRD V3.3 *** B6UG30_MAIZE)
Solyc09g059950.3.1	-1.42586	1.99557e-16	2.96675e-14	amino acid-ligase (AHRD V3.3 *** AT3G07150.1)
Solyc07g032150.3.1	-1.42559	0.00400024	0.023266	Unknown protein
Solyc02g089350.3.1	-1.42191	1.15041e-06	2.16977e-05	Gibberellin regulated protein (AHRD V3.3 *** A0A2U1PE48_ARTAN)
Solyc02g086820.3.1	-1.41983	8.60488e-12	4.90183e-10	chloroplast carbonic anhydrase
Solyc03g112500.4.1	-1.41779	9.09872e-08	2.23328e-06	Raffinose synthase (AHRD V3.3 *** G5DF09_9LAMI)
Solyc10g018550.1.1	-1.41704	0.000908105	0.00699023	Ribonuclease h protein (AHRD V3.3 *** A0A2U1KZV0_ARTAN)
Solyc10g079850.2.1	-1.41695	0.00655224	0.0343111	AP-5 complex subunit beta-like protein (AHRD V3.3 *** Q9LT22_ARATH)
Solyc12g017460.1.1	-1.41626	6.58801e-06	0.000101404	GDSL esterase/lipase At5g03980-like (AHRD V3.3 *** A0A1S3YRJ5_TOBAC)
Solyc02g063150.3.1	-1.40677	3.23205e-14	2.92581e-12	RuBP carboxylase small subunit
Solyc09g066360.1.1	-1.40063	0.00158975	0.0112067	Ethylene Response Factor C.3
Solyc07g063230.3.1	-1.39925	0.000367031	0.00326014	Choline transporter-like protein (AHRD V3.3 *** A0A1R3ICN0_COCAP)
Solyc11g065760.2.1	-1.39843	0.000471773	0.00403879	TK1-like deoxyribonucleoside kinase
Solyc06g074820.3.1	-1.39618	2.72275e-18	6.3023e-16	tonoplast intrinsic protein 1.1
Solyc10g084320.3.1	-1.39563	0.00107282	0.00807971	Subtilisin-like protease (AHRD V3.3 *** O82777_SOLLC)
Solyc10g081450.2.1	-1.39265	9.57922e-06	0.000142295	Alpha/beta-Hydrolases superfamily protein (AHRD V3.3 *** A0A2U1LTX8_ARTAN)
Solyc09g014900.3.1	-1.38816	7.4421e-05	0.000835474	Cytochrome P450 (AHRD V3.3 *** A0A2U1NKI2_ARTAN)
Solyc01g087540.4.1	-1.38798	3.1357e-12	1.92414e-10	DUF642 domain-containing protein (AHRD V3.3 *** A0A1Q3AUQ6_CEPFO)
Solyc01g106100.2.1	-1.38749	0.000234666	0.00224195	Zein-binding domain-containing protein (AHRD V3.3 *** A0A1Q3CXG5_CEPFO)
Solyc01g094920.3.1	-1.38631	2.37419e-19	7.23572e-17	Receptor-like protein kinase (AHRD V3.3 *** A0A2K3LAU4_TRIPR)
Solyc03g112460.3.1	-1.38343	0.000436328	0.00377422	Tryptophan aminotransferase-related protein 2 (AHRD V3.3 *** A0A2G2X8Z7_CAPBA)
Solyc01g110060.3.1	-1.38318	2.77148e-05	0.000354029	Purple acid phosphatase (AHRD V3.3 *** A0A0C5AJS1_SOLLC)
Solyc04g007110.4.1	-1.3825	1.84926e-08	5.36756e-07	transmembrane protein (AHRD V3.3 *** AT3G25805.1)
Solyc01g111010.4.1	-1.37762	0.000244889	0.00232173	X-intrinsic protein 1.6
Solyc08g007890.3.1	-1.37688	6.78098e-13	4.71472e-11	Aldehyde dehydrogenase family 2 member mitochondrial-like (AHRD V3.3 *-* A0A2K3PGY0_TRIPR)
Solyc06g082750.3.1	-1.37439	5.18605e-18	1.1027e-15	50S ribosomal protein L17 (AHRD V3.3 *** A0A1U8H2A3_CAPAN)
Solyc04g074640.4.1	-1.36967	1.06078e-21	6.68876e-19	Ascorbate peroxidase (AHRD V3.3 *** A0A0K2SS60_CITUN)
Solyc04g074440.1.1	-1.36919	7.7544e-05	0.000863037	Protein EXORDIUM-like 1 (AHRD V3.3 *** A0A2G2ZQI6_CAPAN)
Solyc01g091530.4.1	-1.36734	1.56881e-24	1.43436e-21	Fasciclin-like arabinogalactan protein (AHRD V3.3 *** E3WHD6_9ROSI)
Solyc10g083300.2.1	-1.36543	5.59966e-06	8.75174e-05	invertase 8
Solyc02g080310.2.1	-1.36472	0.00795945	0.0398758	Beta-glucosidase 46 (AHRD V3.3 *** A0A1U8FUJ5_CAPAN)
Solyc05g014000.4.1	-1.36374	4.89154e-08	1.29821e-06	Pectate lyase (AHRD V3.3 *** A0A2G3B8Z4_CAPCH)
Solyc01g056780.3.1	-1.35404	3.6107e-19	1.03165e-16	50S ribosomal protein L34 (AHRD V3.3 *** A0A1U8FLP5_CAPAN)
Solyc02g089680.4.1	-1.35379	1.42904e-12	9.26643e-11	Protein trichome birefringence-like 19 (AHRD V3.3 *** A0A2G3ABU9_CAPAN)
Solyc12g088420.2.1	-1.35339	4.19876e-21	2.27502e-18	Peroxisomal membrane 22 kDa (Mpv17/PMP22) family protein (AHRD V3.3 *** A0A2U1NNX3_ARTAN)
Solyc02g069670.4.1	-1.3493	0.00484045	0.0271012	alpha-glucosidase (AHRD V3.3 *** A0A2I4FA71_9ROSI)
Solyc04g079960.1.1	-1.34038	1.04706e-10	4.81069e-09	geranylgeranyl pyrophosphate synthase 2
Solyc09g007330.4.1	-1.33604	0.00977941	0.0466788	DNA helicase mcm8-like protein (AHRD V3.3 *** A0A2K3P3V8_TRIPR)
Solyc11g032050.2.1	-1.33417	0.00127772	0.0093495	GDSL esterase/lipase (AHRD V3.3 *** A0A2G3CP09_CAPCH)
Solyc08g007270.4.1	-1.33349	3.32908e-09	1.12524e-07	homeobox-leucine zipper protein HAT4-like (AHRD V3.3 *** A0A2I4G6W7_9ROSI)
Solyc09g097770.3.1	-1.33177	1.22605e-06	2.29239e-05	Cell wall protein (AHRD V3.3 *** Q40142_SOLLC)
Solyc10g011820.4.1	-1.32963	1.4135e-21	8.61574e-19	Delta(8)-fatty-acid desaturase (AHRD V3.3 *** A0A2G3BES8_CAPCH)
Solyc09g075710.1.1	-1.32586	6.01534e-07	1.22901e-05	Alpha/beta-Hydrolases superfamily protein (AHRD V3.3 *** A0A2U1KC75_ARTAN)
Solyc06g065380.4.1	-1.32578	0.00137114	0.00994948	Calcium-dependent protein kinase (AHRD V3.3 *** Q6EE27_9ROSI)
Solyc02g068615.1.1	-1.32535	0.00291178	0.0180982	Ankyrin repeat (AHRD V3.3 *-* A0A200RCA6_9MAGN)
Solyc01g006370.3.1	-1.3243	0.000346712	0.00310935	Callose synthase (AHRD V3.3 *** K7PRK8_MAIZE)
Solyc10g005540.4.1	-1.32367	2.50491e-05	0.00032578	S-adenosyl-L-methionine-dependent methyltransferases superfamily protein (AHRD V3.3 *** A0A2U1Q4L2_ARTAN)
Solyc07g047710.3.1	-1.32257	1.44289e-09	5.2875e-08	Glucan endo-1,3-beta-glucosidase 1 (AHRD V3.3 *** A0A2G2WCP3_CAPBA)
Solyc09g014480.3.1	-1.32015	0.000809124	0.00635552	Polygalacturonase inhibiting protein (AHRD V3.3 *** D7RJV7_CAPAN)
Solyc11g066880.2.1	-1.31557	0.00113722	0.00847746	Phytosulfokines 2 (AHRD V3.3 *** A0A2G2VX66_CAPBA)
Solyc05g054480.3.1	-1.31493	3.92339e-06	6.38284e-05	Actin (AHRD V3.3 *** A0A2G2VVS8_CAPBA)
Solyc06g083040.3.1	-1.31433	1.6533e-18	4.1414e-16	wound-inducible carboxypeptidase
Solyc09g010995.1.1	-1.31302	0.00313351	0.0192086	Laccase (AHRD V3.3 *** M1AHJ4_SOLTU)
Solyc05g013220.2.1	-1.31177	1.97824e-06	3.48162e-05	3-ketoacyl-CoA synthase (AHRD V3.3 *** A0A2G2VLA8_CAPBA)
Solyc10g006190.4.1	-1.31071	1.3617e-05	0.000193474	Cell differentiation protein RCD1-like protein (AHRD V3.3 *** A0A2G3CUT5_CAPCH),Pfam:PF04078
Solyc03g121170.3.1	-1.30731	2.68816e-08	7.48185e-07	GDSL esterase/lipase (AHRD V3.3 *** A0A2G3D0R1_CAPCH)
Solyc06g066550.3.1	-1.30392	0.00665172	0.0347127	LETM1-like protein (AHRD V3.3 *** A0A2U1PU88_ARTAN)
Solyc04g077450.3.1	-1.30044	0.000114599	0.00121271	DNA binding protein (AHRD V3.3 *** AT3G12210.2)
Solyc08g005570.4.1	-1.30031	0.00204899	0.0136944	Root UVB sensitive family (AHRD V3.3 *** A0A2U1QLM3_ARTAN)
Solyc04g080830.4.1	-1.297	0.00659061	0.0344618	Pentatricopeptide repeat-containing protein (AHRD V3.3 *** A0A1U8GAX9_CAPAN)
Solyc03g005910.3.1	-1.29534	0.000315321	0.00285727	GDSL esterase/lipase (AHRD V3.3 *** A0A2R6RG70_ACTCH)
Solyc08g067840.3.1	-1.29489	1.92223e-05	0.000258836	Photosystem II reaction center PsbP family protein (AHRD V3.3 *** A0A0F7GYP2_9ROSI)
Solyc05g005790.4.1	-1.29259	9.06462e-05	0.000987229	RING-H2 finger protein ATL47-like (AHRD V3.3 *** A0A2I4FLG8_9ROSI)
Solyc05g007790.3.1	-1.29226	0.000334425	0.00301841	Casparian strip membrane protein 1 (AHRD V3.3 *** CASP1_SOLDE)
Solyc01g081290.4.1	-1.2917	0.000177875	0.00177158	Pentatricopeptide repeat-containing protein (AHRD V3.3 *** A0A2G3ALT8_CAPAN)
Solyc09g075470.2.1	-1.28995	1.67954e-16	2.55934e-14	DnaJ-like protein subfamily B member 6 (AHRD V3.3 *** A0A2G2W0L3_CAPBA)
Solyc10g007190.2.1	-1.28986	8.02253e-06	0.000121743	Zinc finger BED domain-containing protein DAYSLEEPER (AHRD V3.3 *-* A0A1J3EGJ5_NOCCA)
Solyc10g045310.2.1	-1.288	1.48623e-06	2.71772e-05	DUF3531 domain-containing protein (AHRD V3.3 *** A0A1Q3B327_CEPFO)
Solyc03g082890.3.1	-1.2851	4.41054e-17	7.44723e-15	Thylakoid lumenal 17.4 kDa protein, chloroplastic (AHRD V3.3 *** A0A2G3CX11_CAPCH)
Solyc07g063480.3.1	-1.28343	0.000227821	0.00218129	Protein kinase domain (AHRD V3.3 *-* A0A200RBU7_9MAGN)
Solyc01g056850.3.1	-1.27799	9.12316e-06	0.000136855	CTP synthase (AHRD V3.3 *** A0A2G2XFG8_CAPBA)
Solyc10g007320.3.1	-1.27794	1.93334e-08	5.56742e-07	Uroporphyrinogen decarboxylase (AHRD V3.3 *** A0A1U8EDS3_CAPAN)
Solyc06g071960.4.1	-1.27064	2.24374e-13	1.73852e-11	Nucleoside diphosphate kinase (AHRD V3.3 *** A0A2G2WM92_CAPBA)
Solyc01g058170.4.1	-1.2701	0.00183844	0.0125674	Agenet domain containing protein (AHRD V3.3 *** A0A2P5F5R4_TREOI)
Solyc06g051200.3.1	-1.26939	8.03793e-24	5.87927e-21	50S ribosomal protein L3 (AHRD V3.3 *** A0A2G2YWM5_CAPAN)
Solyc12g017510.2.1	-1.26912	6.91475e-08	1.73686e-06	RAP domain (AHRD V3.3 *** A0A200Q768_9MAGN)
Solyc06g009790.4.1	-1.26731	0.000219684	0.00211987	Pectin lyase-like superfamily protein (AHRD V3.3 *** A0A2U1PV10_ARTAN)
Solyc04g008730.3.1	-1.26701	0.00606523	0.0323538	Alpha-galactosidase (AHRD V3.3 *** K4BP29_SOLLC)
Solyc01g097460.3.1	-1.26413	5.94132e-25	7.24286e-22	Ribose 5-phosphate isomerase A (AHRD V3.3 *** A0A1Y1IHK3_KLENI)
Solyc04g072740.3.1	-1.26209	2.66512e-08	7.42902e-07	Sulfate transporter 2.1 (AHRD V3.3 *** A0A2G2ZQE3_CAPAN)
Solyc02g085950.4.1	-1.26086	0.00115733	0.00859234	cell wall protein X77373
Solyc01g095610.4.1	-1.26039	7.76399e-06	0.000118212	Protein trichome birefringence-like 25 (AHRD V3.3 *** A0A2G2W6P1_CAPBA)
Solyc03g113250.4.1	-1.26015	3.4474e-06	5.68946e-05	Major facilitator superfamily protein (AHRD V3.3 *** A0A1P8AT47_ARATH)
Solyc07g056390.4.1	-1.25823	1.11818e-05	0.000162795	Endoplasmic reticulum oxidoreductin-1 (AHRD V3.3 *** A0A2G2WEL6_CAPBA)
Solyc02g093100.3.1	-1.25225	0.00270311	0.0170327	Leucine-rich repeat protein kinase family protein (AHRD V3.3 *** A0A2U1N4I0_ARTAN)
Solyc04g082010.1.1	-1.24874	2.38452e-24	2.07635e-21	pre-plastocyanin
Solyc02g079160.2.1	-1.24813	2.67091e-05	0.000343945	Unknown protein
Solyc03g114530.4.1	-1.2477	0.00284836	0.0178252	Strictosidine synthase (AHRD V3.3 *** A0A346A6F4_GELSE)
Solyc01g008670.4.1	-1.24727	7.89575e-08	1.9511e-06	Cytochrome (AHRD V3.3 *** A0A1U8F0H8_CAPAN)
Solyc03g060510.4.1	-1.24688	3.86603e-07	8.29375e-06	Keratin-associated protein, putative (DUF819) (AHRD V3.3 *** Q9LTG3_ARATH)
Solyc01g008250.3.1	-1.24674	9.40408e-25	9.5535e-22	Thioredoxin (AHRD V3.3 *** A0A2U1L6U5_ARTAN)
Solyc01g098740.4.1	-1.24541	1.08005e-07	2.60896e-06	Protein kinase superfamily protein (AHRD V3.3 *** F4HYK7_ARATH)
Solyc09g015040.1.1	-1.24457	1.69228e-06	3.03681e-05	Methyltransferase (AHRD V3.3 *** Q9M005_ARATH)
Solyc11g006040.2.1	-1.24318	3.74176e-05	0.000461374	Receptor protein kinase (AHRD V3.3 *** A0A2R6RJ70_ACTCH)
Solyc02g092790.3.1	-1.24251	2.42011e-15	2.76588e-13	Arabinogalactan (AHRD V3.3 *-* Q43719_SOLLC)
Solyc12g044700.2.1	-1.24177	0.00802848	0.0400679	F-box domain, Leucine-rich repeat domain, L domain-like protein (AHRD V3.3 *-* A0A2U1PDH8_ARTAN)
Solyc07g014730.3.1	-1.24103	0.00169159	0.0117664	Phospholipase A2-alpha (AHRD V3.3 *** A0A2G2WBQ3_CAPBA)
Solyc02g070000.4.1	-1.2395	0.00764143	0.0386425	Leucine-rich receptor-like protein kinase family protein (AHRD V3.3 *** A0A061G8R7_THECC)
Solyc05g005230.3.1	-1.2372	2.97961e-06	4.98949e-05	Plant protein 1589 of Uncharacterized protein function (AHRD V3.3 *** A0A061EE06_THECC)
Solyc02g061820.4.1	-1.23292	1.00722e-14	1.05246e-12	Ankyrin repeat (AHRD V3.3 *** A0A200QEF9_9MAGN)
Solyc12g009200.2.1	-1.23138	3.54301e-17	6.11202e-15	Chlorophyll a-b binding protein, chloroplastic (AHRD V3.3 *** A0A2G3BP51_CAPCH)
Solyc03g114930.3.1	-1.22722	7.63714e-24	5.81887e-21	PsbP-like protein 1, chloroplastic (AHRD V3.3 *** A0A2G3A242_CAPAN)
Solyc07g008530.1.1	-1.22677	0.00174452	0.0120469	Tyrosine--tRNA ligase (AHRD V3.3 *** A0A1U8H9E5_CAPAN)
Solyc06g061170.3.1	-1.22661	0.00631517	0.0334238	Mitochondrial carnitine/acylcarnitine carrier-like protein (AHRD V3.3 *** A0A2G2ZAG7_CAPAN)
Solyc06g005710.3.1	-1.22549	7.04128e-17	1.11963e-14	Protein TIC 62, chloroplastic (AHRD V3.3 *** A0A1J3HBE9_NOCCA)
Solyc01g105540.4.1	-1.22323	2.41888e-11	1.27469e-09	Dicarboxylate transporter 2.1, chloroplastic (AHRD V3.3 *** A0A2G2VAJ2_CAPBA)
Solyc05g055630.3.1	-1.22158	6.87868e-06	0.000105435	S-acyltransferase (AHRD V3.3 *** A0A1U8GRR7_CAPAN)
Solyc04g079790.3.1	-1.22023	8.3025e-12	4.74436e-10	30S ribosomal protein S9 protein (AHRD V3.3 *** A0A2U1PM70_ARTAN)
Solyc09g075600.3.1	-1.21813	0.0079385	0.0398035	GATA transcription factor-like protein (AHRD V3.3 *-* AT1G02700.1)
Solyc11g066410.2.1	-1.21725	4.66147e-18	1.03469e-15	50S ribosomal protein L9 (AHRD V3.3 *** B4FU53_MAIZE)
Solyc03g123720.4.1	-1.21667	6.64287e-11	3.21353e-09	O-fucosyltransferase family protein (AHRD V3.3 *** F4HTC2_ARATH)
Solyc03g005780.3.1	-1.21566	4.83397e-06	7.65316e-05	Chlorophyll a-b binding protein, chloroplastic (AHRD V3.3 *** A0A2G2W7Q4_CAPBA)
Solyc04g076870.4.1	-1.21491	1.67551e-13	1.33792e-11	Glutamyl-tRNA reductase (AHRD V3.3 *** A6Q0F0_TOBAC)
Solyc06g068040.3.1	-1.21337	0.00992725	0.0472483	Pectin lyase-like superfamily protein (AHRD V3.3 *** A0A2U1NJW4_ARTAN)
Solyc08g075240.3.1	-1.21279	0.00929271	0.0448488	Long-chain-alcohol oxidase (AHRD V3.3 *** A0A2G3C0E1_CAPCH)
Solyc05g052300.4.1	-1.21195	0.00489292	0.027303	Amino acid transporter (AHRD V3.3 *** S8C1J4_9LAMI)
Solyc08g066390.3.1	-1.21132	4.48518e-10	1.82664e-08	SAWADEE HOMEODOMAIN protein (AHRD V3.3 *** A0A178W211_ARATH)
Solyc11g019910.1.1	-1.21129	6.13016e-10	2.42632e-08	Plant invertase/pectin methylesterase inhibitor superfamily protein (AHRD V3.3 *** A0A2U1KPL8_ARTAN)
Solyc07g045080.3.1	-1.20953	2.58831e-05	0.000334723	2-alkenal reductase (NADP(+)-dependent)-like (AHRD V3.3 *** A0A2I4GX13_9ROSI)
Solyc01g091360.4.1	-1.20868	7.64497e-12	4.40996e-10	DUF1499 family protein (AHRD V3.3 *** AT3G60810.1)
Solyc02g091940.3.1	-1.20827	0.00150522	0.0107476	hypothetical protein (AHRD V3.3 *** AT5G13310.2)
Solyc05g049940.3.1	-1.20728	0.00357605	0.0212794	hypothetical protein (AHRD V3.3 *** AT1G01715.2)
Solyc12g039170.1.1	-1.20673	0.000535244	0.00450206	Unknown protein
Solyc10g081100.3.1	-1.2055	1.98303e-14	1.91753e-12	50S ribosomal protein 5, chloroplastic (AHRD V3.3 *** A0A2G2VVL1_CAPBA)
Solyc09g007760.4.1	-1.20115	2.9242e-16	4.21039e-14	plasma membrane intrinsic protein 2.10
Solyc01g096250.2.1	-1.20055	5.41058e-05	0.000633	proline-rich receptor-like protein kinase PERK2 (AHRD V3.3 *-* A0A2I4GSB7_9ROSI)
Solyc03g115640.3.1	-1.20046	2.83268e-08	7.87208e-07	DUF538 domain-containing protein (AHRD V3.3 *** A0A1Q3AZJ7_CEPFO)
Solyc06g065490.3.1	-1.19968	4.66238e-19	1.29176e-16	Photosystem II reaction center PsbP family protein (AHRD V3.3 *** A0A0F7CYM1_9ROSI)
Solyc01g100930.3.1	-1.19943	8.08037e-09	2.4875e-07	GDSL esterase/lipase (AHRD V3.3 *** A0A1U8GQF3_CAPAN)
Solyc03g113180.3.1	-1.19845	0.00289672	0.0180413	18.2 kDa class I heat shock protein (AHRD V3.3 *-* A0A2G2VYJ5_CAPBA)
Solyc03g111940.2.1	-1.19839	0.0040989	0.0237462	Cytochrome P450 71A6 (AHRD V3.3 *** A0A2G2ZZC6_CAPAN)
Solyc07g042440.3.1	-1.19679	3.5967e-21	2.12159e-18	Peroxiredoxin Q (AHRD V3.3 *** D7TCA6_VITVI)
Solyc09g005740.3.1	-1.19664	0.00506405	0.028044	Protein SLOW GREEN 1, chloroplastic (AHRD V3.3 *** A0A1J3J1U9_NOCCA)
Solyc02g093170.4.1	-1.19117	6.53229e-11	3.16842e-09	Cyclin delta-3 (AHRD V3.3 *** F4JJY7_ARATH)
Solyc08g078840.3.1	-1.1893	0.00797902	0.0399342	Root meristem growth factor 6 (AHRD V3.3 *** A0A2G3CC16_CAPCH)
Solyc09g097890.2.1	-1.18914	1.81105e-06	3.22461e-05	Cytochrome b561 and DOMON domain-containing protein (AHRD V3.3 *** A0A2G2YQA7_CAPAN)
Solyc01g067630.3.1	-1.18651	1.22111e-10	5.52706e-09	NAD(P)-binding Rossmann-fold superfamily protein (AHRD V3.3 *** Q8VZB1_ARATH)
Solyc02g086910.4.1	-1.18425	9.82361e-12	5.54428e-10	Peptidyl-prolyl cis-trans isomerase protein (AHRD V3.3 *** A0A2U1LHJ7_ARTAN)
Solyc07g063930.4.1	-1.18132	7.435e-06	0.000113392	Organic cation/carnitine transporter 4 (AHRD V3.3 *-* A0A2G2WG88_CAPBA)
Solyc06g065530.4.1	-1.17948	0.00381793	0.0224636	GDSL esterase/lipase (AHRD V3.3 *** A0A314ZSH7_PRUYE)
Solyc02g070800.2.1	-1.17769	8.60366e-13	5.84857e-11	DUF561 domain-containing protein (AHRD V3.3 *** A0A1Q3DH97_CEPFO)
Solyc04g074420.1.1	-1.17734	0.00169167	0.0117664	Protein EXORDIUM-like 1 (AHRD V3.3 *-* A0A2G2WZY1_CAPBA)
Solyc09g007320.4.1	-1.17658	3.08605e-09	1.06074e-07	Pentatricopeptide repeat (AHRD V3.3 *** A0A200R629_9MAGN)
Solyc12g057080.2.1	-1.17488	0.00496872	0.0275996	Glycosyltransferase (AHRD V3.3 *** A0A2G3CNS7_CAPCH)
Solyc03g121400.1.1	-1.17374	0.0106628	0.0499055	Dof zinc finger protein14
Solyc03g116930.3.1	-1.17344	0.00665673	0.034719	Phospholipase-like protein (AHRD V3.3 *** A0A2U1PUP4_ARTAN)
Solyc01g079640.4.1	-1.17342	0.00648643	0.0340738	pollen-specific LRR extensin-like protein (AHRD V3.3 *** AT2G25920.1)
Solyc02g077910.4.1	-1.17314	0.00306395	0.0188522	Mitochondrial substrate carrier family protein (AHRD V3.3 *** A0A1P8B094_ARATH)
Solyc09g065780.3.1	-1.17272	0.00304277	0.0187656	3-ketoacyl-CoA synthase (AHRD V3.3 *** A0A2U1NFY7_ARTAN)
Solyc05g006130.4.1	-1.17229	0.00109562	0.0082277	RNA helicase DEAD17
Solyc08g061630.3.1	-1.17227	2.80993e-16	4.07796e-14	YGGT family protein (AHRD V3.3 *** F8WLD3_CITUN)
Solyc09g090680.3.1	-1.17206	0.000564619	0.00470585	Cysteine-rich repeat secretory protein 3 (AHRD V3.3 *** A0A2G3CR65_CAPCH)
Solyc12g017240.2.1	-1.1696	4.87193e-05	0.000579624	xyloglucan endo-transglycosylase B1
Solyc06g073660.3.1	-1.16927	0.00475169	0.026727	Lipid-transfer protein (AHRD V3.3 *-* B6TD92_MAIZE)
Solyc09g008270.3.1	-1.16898	1.72196e-13	1.36311e-11	translation initiation factor (AHRD V3.3 *** AT2G36885.1)
Solyc06g064550.3.1	-1.168	1.31636e-05	0.000188055	Aspartokinase-homoserine dehydrogenase (AHRD V3.3 *** O63067_SOYBN)
Solyc09g009520.3.1	-1.16695	0.00162371	0.0113934	Alpha/beta-Hydrolases superfamily protein (AHRD V3.3 *** Q9SJM9_ARATH)
Solyc05g013140.4.1	-1.16635	1.39154e-05	0.000196948	O-fucosyltransferase (AHRD V3.3 *** A0A2P5G0B7_TREOI)
Solyc04g077130.1.1	-1.16497	5.68632e-07	1.16569e-05	50S ribosomal protein 6, chloroplastic (AHRD V3.3 *** A0A2G3CPG8_CAPCH)
Solyc05g056290.4.1	-1.16294	6.00074e-09	1.91167e-07	biotin carboxylase carrier
Solyc09g005310.3.1	-1.16236	5.43926e-05	0.000635542	LIMR family protein (AHRD V3.3 *** A0A1U8EDR8_CAPAN)
Solyc10g007100.3.1	-1.16172	2.32346e-05	0.000305441	Protein DETOXIFICATION (AHRD V3.3 *** A0A218WWW8_PUNGR)
Solyc04g007780.3.1	-1.16165	1.28069e-07	3.06528e-06	Sn-1 protein (AHRD V3.3 *** Q42393_CAPAN)
Solyc01g110160.4.1	-1.16091	4.42652e-10	1.80677e-08	hypothetical protein (AHRD V3.3 *** AT2G21385.5)
Solyc03g083720.1.1	-1.16004	0.00224896	0.0147452	Plant invertase/pectin methylesterase inhibitor superfamily protein, putative (AHRD V3.3 *** A0A061G4U8_THECC)
Solyc05g009370.4.1	-1.15957	2.80618e-19	8.41209e-17	50S ribosomal protein L15 (AHRD V3.3 *** A0A2G2YCB4_CAPAN)
Solyc02g067060.3.1	-1.15893	0.00387399	0.0227109	Hexosyltransferase (AHRD V3.3 *** A0A1U8FIH2_CAPAN)
Solyc11g072860.2.1	-1.15849	0.000169976	0.00170474	Histone H4 (AHRD V3.3 *-* F2E7L1_HORVV)
Solyc12g015690.3.1	-1.15468	2.13905e-08	6.0362e-07	fasciclin-like arabinogalactan protein 1 (AHRD V3.3 *** A0A1U8G960_CAPAN)
Solyc10g007870.3.1	-1.15296	2.26634e-07	5.12265e-06	Tumor-related protein (AHRD V3.3 *** Q40447_9SOLA)
Solyc10g082030.2.1	-1.15177	1.09744e-20	4.89459e-18	Peroxiredoxin (AHRD V3.3 *** Q9FE12_PHAVU)
Solyc04g080890.4.1	-1.15165	6.95409e-05	0.000787872	2-oxoglutarate (2OG) and Fe(II)-dependent oxygenase superfamily protein (AHRD V3.3 *** Q9LV19_ARATH)
Solyc02g088820.4.1	-1.15152	6.23102e-10	2.45561e-08	Carboxypeptidase (AHRD V3.3 *** A0A2G3ABI4_CAPAN)
Solyc11g071840.2.1	-1.15016	1.77439e-13	1.3866e-11	SUN-like protein 31
Solyc03g113560.4.1	-1.14855	0.00238928	0.0154602	Transcription factor bHLH79 (AHRD V3.3 *-* A0A2G3A1L3_CAPAN)
Solyc03g119280.3.1	-1.14716	1.7169e-09	6.19235e-08	Histidine--tRNA ligase (AHRD V3.3 *** A0A1J3HAZ7_NOCCA),Pfam:PF13393
Solyc10g075020.3.1	-1.14665	8.59763e-10	3.29594e-08	Elongation factor P (AHRD V3.3 *** A0A2G2YL80_CAPAN)
Solyc00g500125.1.1	-1.14627	0.00126316	0.00925781	Protein TIC 214 (AHRD V3.3 *** TI214_SOLTU)
Solyc05g055990.4.1	-1.14526	3.83901e-09	1.28102e-07	plasma membrane intrinsic protein 2.12
Solyc05g024020.1.1	-1.14417	0.000763278	0.00606312	hypothetical protein (AHRD V3.3 *** AT4G26415.1)
Solyc01g106700.3.1	-1.14383	0.00260531	0.0165534	MADS-box transcription factor 23 (AHRD V3.3 *** A0A2G2Y5S9_CAPAN)
Solyc08g081455.1.1	-1.14335	1.59933e-08	4.67179e-07	Unknown protein
Solyc11g006540.2.1	-1.14303	1.52775e-10	6.75618e-09	FAD/NAD(P)-binding oxidoreductase family protein (AHRD V3.3 *** Q9C574_ARATH)
Solyc03g122240.3.1	-1.14153	0.00329825	0.0199973	Exocyst subunit Exo70 family protein (AHRD V3.3 *** A0A2G3D0E6_CAPCH)
Solyc01g086640.2.1	-1.14147	3.16952e-07	6.99131e-06	O-fucosyltransferase (AHRD V3.3 *** A0A2P5FQR3_TREOI)
Solyc01g080010.2.1	-1.14146	0.00166746	0.0116334	xyloglucan endoglucanase inhibitor
Solyc10g085550.3.1	-1.14106	7.01452e-08	1.75668e-06	Enolase (AHRD V3.3 *** A0A200Q2G1_9MAGN)
Solyc04g078710.3.1	-1.1401	0.00583778	0.0313785	Subtilisin-like protease (AHRD V3.3 *** O82777_SOLLC)
Solyc01g099410.3.1	-1.13989	5.41079e-06	8.47829e-05	Histone H2A (AHRD V3.3 *** A0A0H5QLQ1_9EUKA)
Solyc06g054070.3.1	-1.13984	0.00295453	0.0183016	Non-specific lipid-transfer protein-like protein (AHRD V3.3 *** A0A1J6I240_NICAT)
Solyc03g116740.3.1	-1.13962	3.67925e-07	7.93381e-06	Phosphatidylcholine:diacylglycerol cholinephosphotransferase 1 (AHRD V3.3 *** A0A1U8FVJ4_CAPAN)
Solyc05g026240.3.1	-1.1384	0.00180768	0.0123942	Leucine-rich repeat receptor-like protein kinase family (AHRD V3.3 *** A0A0K9Q1P6_ZOSMR)
Solyc07g062740.4.1	-1.13832	3.93001e-16	5.48582e-14	serine/arginine repetitive matrix protein (AHRD V3.3 --* AT3G15115.1)
Solyc03g034380.1.1	-1.13807	0.000321257	0.00290674	Bifunctional inhibitor/lipid-transfer protein/seed storage 2S albumin superfamily protein (AHRD V3.3 *** Q9FF39_ARATH)
Solyc10g018600.2.1	-1.13734	3.58979e-07	7.75922e-06	Cationic amino acid transporter (AHRD V3.3 *** S8E1X3_9LAMI)
Solyc02g091860.3.1	-1.13665	1.52459e-06	2.76848e-05	Receptor kinase (AHRD V3.3 *** D9IAP8_GOSHI)
Solyc03g121180.4.1	-1.13632	3.2749e-26	4.9904e-23	GDSL esterase/lipase (AHRD V3.3 *** A0A2G3D0P9_CAPCH)
Solyc12g098890.2.1	-1.13599	1.93489e-15	2.26379e-13	50S ribosomal protein L18 (AHRD V3.3 *** A0A1U8F639_CAPAN)
Solyc09g074880.4.1	-1.13368	3.5808e-09	1.20587e-07	Protein LOW PSII ACCUMULATION 1, chloroplastic (AHRD V3.3 *** A0A2G2W035_CAPBA)
Solyc01g079830.3.1	-1.1322	0.00976411	0.0466179	hypothetical protein (AHRD V3.3 *** AT5G19190.1)
Solyc01g079580.3.1	-1.13146	4.77858e-08	1.27007e-06	Tetratricopeptide repeat (TPR)-like superfamily protein (AHRD V3.3 *** A0A2U1LZR6_ARTAN)
Solyc02g091240.1.1	-1.13104	4.18483e-07	8.88777e-06	Auxin efflux carrier (AHRD V3.3 *** A0A2U1QP17_ARTAN)
Solyc09g072860.2.1	-1.12972	0.00675392	0.0350659	Fanconi anemia group F protein (FANCF) (AHRD V3.3 *** A0A1P8B9K4_ARATH)
Solyc11g044360.3.1	-1.12776	1.8427e-05	0.000249227	Mitochondrial transcription termination factor family protein (AHRD V3.3 *** F4JSZ0_ARATH)
Solyc02g083500.3.1	-1.12729	5.77152e-10	2.2993e-08	cell wall integrity/stress response component (AHRD V3.3 *** AT5G66090.1)
Solyc12g056150.2.1	-1.12577	0.00249748	0.0159793	Peptidase C45, acyl-coenzyme A/6-aminopenicillanic acid acyl-transferase (AHRD V3.3 *** B6THR2_MAIZE)
Solyc04g064490.3.1	-1.12573	3.25536e-06	5.41159e-05	Hexosyltransferase (AHRD V3.3 *** A0A2G2WYI5_CAPBA)
Solyc04g079680.4.1	-1.12492	0.000115851	0.00122524	Cytochrome P450 (AHRD V3.3 *** A0A2U1M7T5_ARTAN)
Solyc02g069450.3.1	-1.12267	1.83539e-20	7.62773e-18	Photosystem I reaction center subunit III, chloroplastic (AHRD V3.3 *** A0A1U8FJA0_CAPAN)
Solyc09g063130.3.1	-1.12178	5.10824e-41	9.34093e-37	Photosystem I reaction center subunit IV (AHRD V3.3 *-* A0A2P6U4S6_CHLSO)
Solyc04g008820.3.1	-1.12148	4.08023e-05	0.000496745	High mobility group B protein 7 (AHRD V3.3 *** A0A2G2X9D0_CAPBA)
Solyc09g092560.4.1	-1.12083	0.000774469	0.00613602	Cytochrome (AHRD V3.3 *** A0A2G2W281_CAPBA)
Solyc12g039070.2.1	-1.12055	0.00317391	0.0194024	Strictosidine synthase family protein (AHRD V3.3 *** D7LVM7_ARALL)
Solyc07g006520.3.1	-1.11819	2.7461e-11	1.43883e-09	Preprotein translocase subunit SECY, chloroplastic (AHRD V3.3 *** A0A2G2WAI9_CAPBA)
Solyc05g008120.4.1	-1.11608	2.92488e-19	8.6265e-17	DnaJ-like protein subfamily B member 6 (AHRD V3.3 *-* A0A2G3B5R9_CAPCH)
Solyc06g071160.3.1	-1.11587	0.000934336	0.00716664	Galactosyltransferase family protein (AHRD V3.3 *** A0A2U1KC25_ARTAN)
Solyc12g009600.2.1	-1.11518	2.68543e-14	2.48009e-12	Thylakoid lumenal 16.5 kDa protein, chloroplastic (AHRD V3.3 *** A0A2G2YVM2_CAPAN)
Solyc11g009020.2.1	-1.11386	4.35446e-21	2.27502e-18	Haloacid dehalogenase-like hydrolase (HAD) superfamily protein (AHRD V3.3 *** A0A2U1MUT6_ARTAN),Pfam:PF13419
Solyc06g051300.3.1	-1.11151	0.000478239	0.0040884	Chromosome transmission fidelity-like protein (AHRD V3.3 *** F4KEU4_ARATH)
Solyc12g057160.1.1	-1.10964	8.09106e-07	1.58919e-05	Unknown protein
Solyc12g011280.2.1	-1.10952	7.28925e-14	6.17089e-12	Chlorophyll a-b binding protein, chloroplastic (AHRD V3.3 *** A0A0F7H004_9ROSI)
Solyc06g084610.4.1	-1.10773	1.73969e-12	1.11621e-10	Beta-carotene isomerase D27, chloroplastic (AHRD V3.3 *** A0A1J3JUT0_NOCCA)
Solyc11g008420.3.1	-1.10661	3.86831e-18	8.84199e-16	SKP1-like protein (AHRD V3.3 *** A0A2K3JJY8_TRIPR)
Solyc06g084090.4.1	-1.10639	7.44668e-06	0.000113475	Histone H2A (AHRD V3.3 *** A0A2G3CCJ9_CAPCH)
Solyc01g110940.3.1	-1.10631	0.0023558	0.0153031	Auxin-responsive protein SAUR20 (AHRD V3.3 *** A0A2G2XY34_CAPAN)
Solyc07g062870.3.1	-1.10569	1.39479e-19	4.4746e-17	30S ribosomal protein S20, chloroplastic (AHRD V3.3 *** A0A2G3C1Q1_CAPCH)
Solyc10g076300.2.1	-1.1056	0.00158007	0.0111643	CASP-like protein (AHRD V3.3 *** A0A1Q3C9H0_CEPFO)
Solyc11g068820.3.1	-1.10491	3.37951e-22	2.20706e-19	50S ribosomal protein L27 (AHRD V3.3 *** Q8LEF5_ARATH)
Solyc05g009500.3.1	-1.1039	8.40095e-05	0.000924306	Protein NRT1/ PTR FAMILY 3.1 (AHRD V3.3 *** A0A1U8GM13_CAPAN)
Solyc01g080400.3.1	-1.10198	0.005325	0.0291448	Protein phosphatase 2C family protein (AHRD V3.3 *** A0A2U1LBE2_ARTAN)
Solyc02g087310.3.1	-1.10064	0.00450688	0.0256418	E2F transcription factor-like E2FE (AHRD V3.3 *** A0A2G2VFD9_CAPBA)
Solyc04g050470.4.1	-1.09941	8.05456e-11	3.78626e-09	Ammonium transporter (AHRD V3.3 *** A0A2K3LM80_TRIPR)
Solyc08g007040.3.1	-1.09762	1.72701e-16	2.60993e-14	Glycine cleavage system H protein (AHRD V3.3 *** A0A2G2W3F1_CAPBA)
Solyc01g065530.3.1	-1.09609	1.16493e-05	0.000168731	COBRA-like protein (AHRD V3.3 *** A0A2G3AIT3_CAPAN)
Solyc07g061900.3.1	-1.09573	8.25371e-14	6.95518e-12	50S ribosomal protein L4 (AHRD V3.3 *** B6TG27_MAIZE)
Solyc12g005410.2.1	-1.0953	2.24154e-06	3.87784e-05	Bile acid:sodium symporter (AHRD V3.3 *** A0A200R883_9MAGN)
Solyc09g062970.1.1	-1.0948	0.000427309	0.00371377	Unknown protein
Solyc04g082000.4.1	-1.0919	6.94574e-13	4.7748e-11	Phospholipase D (AHRD V3.3 *** K4BVS9_SOLLC)
Solyc01g106590.4.1	-1.09153	0.00648149	0.0340576	Protein trichome birefringence-like 13 (AHRD V3.3 *** A0A1U8E7U9_CAPAN)
Solyc09g065660.4.1	-1.09142	7.01082e-21	3.46486e-18	Heat shock transcription factor (AHRD V3.3 *-* A0A1Y1I763_KLENI)
Solyc12g094640.3.1	-1.09095	6.81516e-16	9.10699e-14	Glyceraldehyde-3-phosphate dehydrogenase (AHRD V3.3 *** A0A2G2YA75_CAPAN)
Solyc11g071540.2.1	-1.08976	0.0022485	0.0147452	TATA box-binding protein-associated factor RNA polymerase I subunit B (AHRD V3.3 *** A0A2I4EE95_9ROSI)
Solyc02g068090.3.1	-1.08955	9.57198e-18	1.86206e-15	30S ribosomal protein S21 (AHRD V3.3 *** A0A2G2XI83_CAPBA)
Solyc10g086390.2.1	-1.08687	0.00453822	0.02578	Short-chain dehydrogenase TIC 32, chloroplastic (AHRD V3.3 *** A0A1U8E748_CAPAN)
Solyc08g028970.3.1	-1.08606	1.76306e-13	1.38477e-11	Vacuolar iron transporter-like protein 3 (AHRD V3.3 *-* A0A2G3AWL9_CAPCH)
Solyc01g067290.3.1	-1.08604	1.14905e-12	7.64053e-11	Divinyl chlorophyllide a 8-vinyl-reductase, chloroplastic (AHRD V3.3 *** A0A2G2XQY6_CAPBA)
Solyc02g077630.3.1	-1.08561	0.00178006	0.0122528	Receptor-like protein kinase (AHRD V3.3 *** A0A2R6QLC9_ACTCH)
Solyc10g006030.3.1	-1.08418	8.20095e-16	1.07887e-13	30S ribosomal protein S10, chloroplastic (AHRD V3.3 *** A0A2G2VQX8_CAPBA)
Solyc11g072440.2.1	-1.0831	9.48992e-05	0.00102926	Alpha/beta-Hydrolases superfamily protein (AHRD V3.3 *** Q9SF34_ARATH)
Solyc10g007050.3.1	-1.08303	6.51782e-05	0.000746772	Enolase-phosphatase E1 (AHRD V3.3 *** U2LNY1_SERFO)
Solyc01g099020.3.1	-1.08286	1.85356e-16	2.77821e-14	GDSL esterase/lipase (AHRD V3.3 *** A0A199UFA2_ANACO)
Solyc01g108610.3.1	-1.08223	1.19159e-12	7.8662e-11	Cyclin-dependent kinase inhibitor (AHRD V3.3 *** A0A2G2W9Z0_CAPBA)
Solyc02g068140.3.1	-1.08174	0.00235507	0.0153031	Major facilitator superfamily protein (AHRD V3.3 *** A0A2U1PZJ0_ARTAN)
Solyc01g087750.4.1	-1.08047	3.05525e-17	5.37196e-15	protein RETICULATA-RELATED 4, chloroplastic-like (AHRD V3.3 *** A0A2I4G748_9ROSI)
Solyc09g098160.3.1	-1.07986	0.000161504	0.00163254	pirin
Solyc08g006760.4.1	-1.07975	1.60879e-09	5.83697e-08	Unknown protein
Solyc08g080080.4.1	-1.07966	7.01842e-10	2.73061e-08	WD40 repeat (AHRD V3.3 *** A0A200PPM9_9MAGN)
Solyc08g007580.4.1	-1.07841	0.00511838	0.0282647	Ycf49-like protein (AHRD V3.3 *** A0A2G2W320_CAPBA)
Solyc12g042170.3.1	-1.07745	0.00340006	0.0204807	Adp-ribosylation factor gtpase-activating protein agd3 (AHRD V3.3 *-* A0A314L4B5_NICAT)
Solyc04g054810.3.1	-1.07673	7.35748e-25	7.91406e-22	Pollen Ole e 1 allergen/extensin (AHRD V3.3 *** A0A200QVY0_9MAGN),Pfam:PF01190
Solyc12g150101.1.1	-1.0767	1.22513e-14	1.21754e-12	Photosystem II reaction center X protein (AHRD V3.3 *** A0A2G2X3Z0_CAPBA)
Solyc07g007600.3.1	-1.07362	1.00721e-14	1.05246e-12	vacuolar-type H+-pyrophosphatase
Solyc03g116730.4.1	-1.07207	2.59671e-11	1.36447e-09	Palmitoyl-monogalactosyldiacylglycerol delta-7 desaturase, chloroplastic (AHRD V3.3 *** A0A2G2WQQ5_CAPBA)
Solyc02g077330.3.1	-1.07196	5.71984e-08	1.47939e-06	GDSL esterase/lipase (AHRD V3.3 *** A0A2G3D5Q8_CAPCH)
Solyc12g098570.2.1	-1.07013	0.000294975	0.00270743	receptor-like kinase TMK4 (AHRD V3.3 *** A0A2G2YAU4_CAPAN)
Solyc06g076790.1.1	-1.069	9.83341e-19	2.53259e-16	Thylakoid soluble phosphoprotein TSP9 (AHRD V3.3 *-* A0A200Q7Q2_9MAGN)
Solyc02g087150.3.1	-1.06861	4.30448e-13	3.19419e-11	Heavy metal transport/detoxification superfamily protein (AHRD V3.3 *-* AT5G14910.2)
Solyc12g100160.3.1	-1.06787	3.33777e-15	3.72161e-13	50S ribosomal protein L6 (AHRD V3.3 *** A0A2G2YBF1_CAPAN)
Solyc12g010840.2.1	-1.06705	2.10877e-14	2.00839e-12	Ketol-acid reductoisomerase (AHRD V3.3 *** M1ADA6_SOLTU)
Solyc01g079610.3.1	-1.0661	1.95069e-08	5.60854e-07	DnaJ protein ERDJ3B (AHRD V3.3 *** A0A2G2Z6I0_CAPAN)
Solyc08g079090.4.1	-1.06563	1.17605e-05	0.000169868	Monocopper oxidase-like protein sku5 (AHRD V3.3 *** A0A1J6IJ65_NICAT)
Solyc08g082690.2.1	-1.06419	1.35512e-12	8.88165e-11	Ribosomal protein S6 (AHRD V3.3 *** A0A200QWA6_9MAGN)
Solyc02g080540.1.1	-1.06347	8.11618e-27	1.48412e-23	ATP synthase gamma chain, chloroplastic (AHRD V3.3 *** A0A2G3D743_CAPCH)
Solyc02g065430.1.1	-1.06332	1.71854e-13	1.36311e-11	HTH-type transcriptional regulator (AHRD V3.3 *** Q680G2_ARATH)
Solyc02g063355.1.1	-1.06317	1.75476e-15	2.09723e-13	Calcium-dependent lipid-binding (CaLB domain) family protein (AHRD V3.3 *** A0A2U1LMA8_ARTAN)
Solyc09g090410.3.1	-1.06087	2.53062e-17	4.53676e-15	50S ribosomal protein L28 (AHRD V3.3 *** A0A1U8GBC9_CAPAN)
Solyc01g058270.3.1	-1.06027	0.00829239	0.04106	O-acetyltransferase family protein (AHRD V3.3 *** A0A2U1M4H7_ARTAN)
Solyc12g013580.3.1	-1.05964	1.56689e-09	5.70759e-08	Peptidyl-prolyl cis-trans isomerase CYP37, chloroplastic (AHRD V3.3 *** A0A1U8GBH5_CAPAN)
Solyc10g078280.3.1	-1.05963	9.49852e-06	0.000141326	Cytochrome P450 (AHRD V3.3 *** A0A2U1NMT2_ARTAN)
Solyc07g056000.2.1	-1.05947	6.72577e-07	1.35793e-05	Xyloglucan endotransglucosylase/hydrolase (AHRD V3.3 *** Q43528_SOLLC)
Solyc07g052980.3.1	-1.05882	4.78043e-13	3.51064e-11	xyloglucan endotransglycosylase/hydrolase 16
Solyc07g049450.3.1	-1.05833	1.6329e-10	7.10934e-09	Protein disulfide-isomerase like 2-2 (AHRD V3.3 *** A0A2G3C063_CAPCH)
Solyc03g120020.4.1	-1.05772	2.78663e-09	9.68751e-08	HCO3-transporter family (AHRD V3.3 *** A0A2U1LER8_ARTAN)
Solyc10g085230.2.1	-1.05729	9.42899e-05	0.00102325	ripening-related mRNA 1b
Solyc04g074110.4.1	-1.05674	3.58067e-06	5.86178e-05	Carbohydrate esterase, putative (DUF303) (AHRD V3.3 *** Q0WNN6_ARATH)
Solyc05g025500.3.1	-1.05215	0.000124801	0.0013078	Glucan endo-1,3-beta-glucosidase 5 (AHRD V3.3 *** A0A2G2ZI86_CAPAN)
Solyc07g006000.3.1	-1.05072	3.44414e-15	3.81695e-13	50S ribosomal protein L35 (AHRD V3.3 *** A0A2G3BXF7_CAPCH)
Solyc06g083760.3.1	-1.0496	0.000670993	0.00542671	Histone-lysine N-methyltransferase SUVR1 (AHRD V3.3 *** A0A2G3CC74_CAPCH)
Solyc06g036100.3.1	-1.04786	0.00336192	0.0203025	Transporter arsB (AHRD V3.3 *** A0A2U1Q5Y3_ARTAN)
Solyc10g086570.3.1	-1.04655	1.60382e-12	1.03631e-10	transmembrane protein (AHRD V3.3 *** AT5G02160.1)
Solyc01g091640.3.1	-1.04654	1.4938e-06	2.72339e-05	S-adenosyl-L-methionine-dependent methyltransferases superfamily protein (AHRD V3.3 *** A0A2U1MZF9_ARTAN)
Solyc12g056620.2.1	-1.04644	0.000430019	0.00373023	Chlorophyll a/b binding protein domain-containing protein (AHRD V3.3 *-* A0A2U1PDX9_ARTAN)
Solyc01g079180.4.1	-1.04627	3.87379e-05	0.000474455	Pectinesterase (AHRD V3.3 *** A0A2G2XQP7_CAPBA)
Solyc09g091230.4.1	-1.04609	0.000248554	0.0023513	Core-2/I-branching beta-1,6-N-acetylglucosaminyltransferase family protein (AHRD V3.3 *** Q9LIQ3_ARATH)
Solyc06g074790.2.1	-1.04594	8.38682e-05	0.000923308	Histone H2B (AHRD V3.3 *** A0A2G3CAQ8_CAPCH)
Solyc05g055550.3.1	-1.04494	7.12482e-08	1.77741e-06	vacuolar acid trehalase (AHRD V3.3 *** AT3G10405.1)
Solyc10g076290.2.1	-1.04489	1.24121e-05	0.000178014	F-box/LRR-repeat protein 3 (AHRD V3.3 *** A0A2G2YKP8_CAPAN)
Solyc01g080770.3.1	-1.04396	0.00782885	0.039405	Leucine-rich receptor-like protein kinase family protein (AHRD V3.3 *** A0A061DVS1_THECC)
Solyc06g007760.4.1	-1.04256	2.98097e-11	1.53983e-09	Ycf54-like protein (AHRD V3.3 *** B4FED9_MAIZE)
Solyc02g065610.3.1	-1.04229	0.000261647	0.0024583	Protein trichome birefringence-like 21 (AHRD V3.3 *** A0A2G3A5R0_CAPAN)
Solyc11g073260.2.1	-1.04221	4.3726e-06	7.03231e-05	Histone H2A (AHRD V3.3 *** Q9ST30_SOLME)
Solyc08g074960.3.1	-1.0405	0.000133434	0.00138792	Major facilitator superfamily protein (AHRD V3.3 *** F4KD53_ARATH)
Solyc01g057200.4.1	-1.04023	1.49192e-06	2.72268e-05	Pentatricopeptide repeat-containing protein (AHRD V3.3 *** A0A2U1QJ39_ARTAN)
Solyc04g050570.3.1	-1.04011	0.00114594	0.00852653	GDSL esterase/lipase (AHRD V3.3 *** A0A1U8GR17_CAPAN)
Solyc01g080410.3.1	-1.03985	0.0012093	0.00892744	Peptide-methionine (R)-S-oxide reductase (AHRD V3.3 *** A0A1U8FLP0_CAPAN)
Solyc09g083380.4.1	-1.03878	2.1376e-07	4.84965e-06	Histone H1 (AHRD V3.3 *-* A0A2G3CST5_CAPCH)
Solyc08g005520.3.1	-1.03872	2.02081e-10	8.59362e-09	Ankyrin repeat (AHRD V3.3 *** A0A200QXM0_9MAGN)
Solyc02g086730.3.1	-1.03467	1.41889e-24	1.36557e-21	Ribosomal protein L7/L12 (AHRD V3.3 *** A0A200R2P7_9MAGN)
Solyc03g007510.4.1	-1.03351	0.00985134	0.0469241	HAT transposon superfamily (AHRD V3.3 *** A0A2U1Q846_ARTAN)
Solyc09g092460.4.1	-1.0333	2.73012e-06	4.61822e-05	receptor-like kinase TMK4 (AHRD V3.3 *** A0A2G2XZ75_CAPAN)
Solyc04g009030.3.1	-1.02653	1.92003e-19	5.95079e-17	Glyceraldehyde-3-phosphate dehydrogenase (AHRD V3.3 *** A0A0A8IBT8_NICBE)
Solyc08g083140.4.1	-1.02534	0.00475029	0.026727	Alpha/beta-Hydrolases superfamily protein (AHRD V3.3 *** A0A1Y1I3I6_KLENI)
Solyc02g079500.4.1	-1.02447	0.00278899	0.0175136	Peroxidase (AHRD V3.3 *** M1C184_SOLTU)
Solyc07g005370.4.1	-1.02385	6.24398e-12	3.62468e-10	Bet v I domain (AHRD V3.3 *** A0A200PXK2_9MAGN)
Solyc06g060410.3.1	-1.0232	0.00247592	0.0158859	Phosphatidylinositol-4-phosphate 5-kinase, putative (AHRD V3.3 *** Q8LAR3_ARATH)
Solyc01g094520.3.1	-1.02283	0.00398414	0.0231872	F-box/kelch-repeat protein SKIP4 (AHRD V3.3 *** A0A2G3BT10_CAPCH)
Solyc12g062800.1.1	-1.0223	0.0095758	0.0459106	Unknown protein
Solyc05g052710.3.1	-1.02219	4.65027e-16	6.43807e-14	30S ribosomal protein S31, chloroplastic (AHRD V3.3 *** A0A1U8GYZ2_CAPAN)
Solyc06g065390.4.1	-1.02166	8.67136e-07	1.68506e-05	50S ribosomal protein L21, chloroplastic (AHRD V3.3 *** A0A1U8GUE9_CAPAN)
Solyc02g069120.3.1	-1.02059	7.20418e-11	3.43878e-09	zinc finger protein ZPR1-like (AHRD V3.3 *** A0A2I4F7X7_9ROSI)
Solyc03g034220.3.1	-1.02011	4.2663e-21	2.27502e-18	Tomato RuBP carboxylase small subunit
Solyc01g109690.1.1	-1.01947	3.64395e-06	5.95471e-05	Protein RADIALIS-like 6 (AHRD V3.3 *** A0A2G2XX78_CAPAN)
Solyc09g014970.4.1	-1.01901	2.29614e-05	0.000302501	Methylketone synthase Ib (AHRD V3.3 *** E0YCS5_SOLLC)
Solyc06g051010.1.1	-1.01848	0.00824042	0.0408802	Peptide-N4-(N-acetyl-beta-glucosaminyl)asparagine amidase A (AHRD V3.3 *** A0A200PX65_9MAGN)
Solyc04g078910.3.1	-1.01752	5.45174e-07	1.12391e-05	Thioredoxin-like 4, chloroplastic (AHRD V3.3 *** A0A2G2VBX3_CAPBA)
Solyc03g118410.3.1	-1.01695	1.57605e-05	0.000218497	Acyl carrier protein (AHRD V3.3 *** A0A1U8G884_CAPAN)
Solyc02g088390.4.1	-1.01612	1.05506e-13	8.72981e-12	Lamin-like protein (AHRD V3.3 *** A0A2G2V9B8_CAPBA)
Solyc09g075560.1.1	-1.01581	0.00854876	0.0419658	Hexosyltransferase (AHRD V3.3 *** A0A2G3BWD5_CAPCH)
Solyc11g069960.2.1	-1.01537	1.08102e-10	4.94189e-09	RLK-1
Solyc02g069620.4.1	-1.01529	1.05684e-10	4.84344e-09	Ribose 5-phosphate isomerase A (AHRD V3.3 *** A0A1Y1I8P0_KLENI)
Solyc07g063960.3.1	-1.01493	5.33456e-15	5.80642e-13	50S ribosomal protein L24, chloroplastic (AHRD V3.3 *** A0A1U8EMT5_CAPAN)
Solyc06g051960.3.1	-1.01474	2.22801e-11	1.1775e-09	Pectinesterase (AHRD V3.3 *** A0A2G2WIV2_CAPBA)
Solyc01g109040.4.1	-1.01368	1.61651e-17	2.98581e-15	Cytochrome b6-f complex subunit 7 (AHRD V3.3 *** A0A1U8DXD4_CAPAN)
Solyc09g018310.4.1	-1.0125	0.0025813	0.0164236	stress response NST1-like protein (AHRD V3.3 *** AT3G51650.4)
Solyc10g008130.3.1	-1.01237	2.46788e-09	8.64516e-08	RNA-binding (RRM/RBD/RNP motifs) family protein (AHRD V3.3 *** AT3G56510.5)
Solyc12g044280.2.1	-1.01186	3.07291e-13	2.3124e-11	Photosystem I reaction center subunit VI, chloroplastic (AHRD V3.3 *** A0A2G3D0C1_CAPCH)
Solyc06g068860.3.1	-1.01076	0.000287772	0.00265366	Alpha-mannosidase (AHRD V3.3 *** E0XN34_SOLLC)
Solyc06g084060.3.1	-1.01019	0.00202175	0.013547	F-box/LRR-repeat protein 17 (AHRD V3.3 *** A0A2G2WN42_CAPBA)
Solyc09g060110.4.1	-1.00968	1.79168e-05	0.000243408	Protein kinase domain (AHRD V3.3 *** A0A200PPE5_9MAGN)
Solyc08g006790.4.1	-1.00915	0.00105756	0.00797937	Early nodulin-like protein 3 (AHRD V3.3 *** A0A2G3AND2_CAPAN)
Solyc08g074480.1.1	-1.00828	1.78505e-05	0.000242868	Bifunctional inhibitor/lipid-transfer protein/seed storage 2S albumin superfamily protein (AHRD V3.3 *** A0A2U1PU47_ARTAN)
Solyc01g074000.3.1	-1.00746	0.000497689	0.004227	Histone H3 (AHRD V3.3 *** D8L9K7_WHEAT)
Solyc02g085340.1.1	-1.00597	0.000500674	0.0042425	Transcription factor GRAS (AHRD V3.3 *** A0A200Q206_9MAGN)
Solyc11g010480.2.1	-1.00557	1.0268e-13	8.61289e-12	Protein CURVATURE THYLAKOID 1A, chloroplastic (AHRD V3.3 *** A0A2G3B0C6_CAPCH)
Solyc08g066740.3.1	-1.00449	1.61186e-06	2.90962e-05	Early nodulin-like protein 1 (AHRD V3.3 *** A0A1J3CHP6_NOCCA)
Solyc10g078580.1.1	-1.00446	1.59627e-06	2.88717e-05	arabinogalactan protein 14 (AHRD V3.3 *** XP_004249150.1)
Solyc02g088740.1.1	-1.00421	4.93411e-06	7.80495e-05	hypothetical protein (AHRD V3.3 *** AT3G29370.1)
Solyc03g044330.1.1	-1.00391	1.92153e-10	8.24815e-09	Acetolactate synthase (AHRD V3.3 *** C0L093_TOBAC)
Solyc09g015830.3.1	-1.00366	0.000283275	0.00262277	Receptor protein kinase-like protein (AHRD V3.3 *** Q8VZH5_CAPAN)
Solyc02g082920.4.1	-1.0034	0.00240666	0.0155231	acidic extracellular 26 kD chitinase
Solyc11g072840.1.1	-1.00284	0.00134471	0.00977712	Histone H4 (AHRD V3.3 *-* F2E7L1_HORVV)
Solyc03g096030.3.1	-1.00074	0.00677394	0.0351499	Protein trichome birefringence-like 28 (AHRD V3.3 *** A0A1J3CSC5_NOCCA)
Solyc04g081000.3.1	-1.00054	0.00909158	0.0441212	Deficiens
Solyc07g065500.2.1	-1.00023	5.12808e-05	0.000605371	Nuclear transcription factor Y subunit B-3 (AHRD V3.3 *** A0A2G2WFH7_CAPBA)
