# Supplementary material for: Application of ethanol alleviates heat damage to leaf growth and yield in tomato
Source: Front Plant Sci. 2024 Feb 19;15:1325365. doi: 10.3389/fpls.2024.1325365 (PMC10909983; doi:10.3389/fpls.2024.1325365)
Supplement: Supplementary file 6 [file Table_5.xlsx]

## Sheet: UP
Supplemental Table S5. Up-regulated DEGs of E3H30m vs W3H30m in root (log2 fold change ≧ 1.0, p_value < 0.05, p_adj < 0.05).
GeneID	log2FoldChange	p_value	p_adj	Annotation	IDR
Solyc09g082280.3.1	6.09429	2.33526e-18	8.98001e-15	Lipid transfer protein (AHRD V3.3 *** K7WVB3_SOLTU)	TRUE
Solyc02g085660.1.1	6.02006	1.21133e-16	2.32902e-13	Glycosyltransferase (AHRD V3.3 *** A0A2I4ENI5_9ROSI)	FALSE
Solyc06g009040.4.1	4.93169	1.48297e-19	7.12828e-16	Glutathione S-transferase (AHRD V3.3 *** A0A2G3C3Q3_CAPCH)	FALSE
Solyc08g068720.1.1	4.57931	6.2505e-05	0.00155269	Tyramine N-feruloyltransferase 10/30 (AHRD V3.3 *** A0A2G2W3Q5_CAPBA)	TRUE
Solyc06g072210.1.1	4.5732	0.00374434	0.0347713	Miraculin (AHRD V3.3 *** A0A1U8H778_CAPAN)	FALSE
Solyc01g099480.4.1	3.64585	0.00123301	0.0153048	ATP-dependent DNA helicase (AHRD V3.3 *-* A0A2G2XW06_CAPAN)	FALSE
Solyc00g500243.1.1	3.63056	0.000196514	0.00379737	Cytochrome c oxidase subunit 2 (AHRD V3.3 *-* A0A0C5B2A3_HYONI)	TRUE
Solyc10g050980.1.1	3.5066	8.95385e-05	0.00205682	Unknown protein	TRUE
Solyc02g005490.3.1	3.40998	1.76307e-06	9.01692e-05	60S acidic ribosomal protein P1-like (AHRD V3.3 --* XP_026407736.1),Pfam:PF00428	TRUE
Solyc03g093940.2.1	3.33782	0.00289429	0.0289511	R2R3MYB transcription factor 51	FALSE
Solyc04g078300.3.1	3.29703	6.43364e-06	0.000253483	MADS-box transcription factor (AHRD V3.3 *** A0A2K3PNN3_TRIPR)	TRUE
Solyc02g089140.3.1	3.20883	1.71789e-05	0.00055234	B12D protein (AHRD V3.3 *** A0A2U1M961_ARTAN)	FALSE
Solyc08g006410.4.1	3.08321	4.72098e-06	0.000198622	Glycosyltransferase (AHRD V3.3 *** B9VJL9_9SOLA)	FALSE
Solyc04g077580.3.1	3.00382	0.000224814	0.00422532	BnaC03g48770D protein (AHRD V3.3 *** A0A078HIB5_BRANA)	FALSE
Solyc10g050990.2.1	2.99397	0.000638134	0.00930205	Unknown protein	TRUE
Solyc05g009280.4.1	2.96461	0.000115015	0.00250724	3-ketoacyl-CoA synthase (AHRD V3.3 *** A0A1U8EJW1_CAPAN)	FALSE
Solyc01g009580.2.1	2.82737	1.31075e-06	7.13933e-05	Terminal flower 1 (AHRD V3.3 *** A0A2Z4I2Q4_CITLI)	FALSE
Solyc01g108220.3.1	2.80258	0.0044085	0.0389057	Unknown protein	TRUE
Solyc04g014280.1.1	2.73889	0.00143953	0.0172126	hydroxyproline-rich glycoprotein family protein (AHRD V3.3 *** AT5G09520.1)	TRUE
Solyc11g021060.2.1	2.7352	6.04772e-13	4.00964e-10	TOMARPIX proteinase inhibitor	FALSE
Solyc06g011380.2.1	2.73093	0.00245762	0.025639	Chaperone protein ClpB (AHRD V3.3 *-* B2IUM0_NOSP7)	FALSE
Solyc11g009100.2.1	2.69677	0.00129563	0.015877	ABC transporter-like (AHRD V3.3 *-* A0A200QYY8_9MAGN)	TRUE
Solyc10g011925.1.1	2.6645	0.00326453	0.0315751	Phenylalanine ammonia-lyase (AHRD V3.3 *** A0A2G3BJ62_CAPCH)	FALSE
Solyc10g078890.2.1	2.64339	0.000890048	0.0119337	Peroxidase (AHRD V3.3 *** K4D2D0_SOLLC)	FALSE
Solyc04g071270.1.1	2.52264	0.00319777	0.0310994	F-box family protein (AHRD V3.3 *** A0A2U1L823_ARTAN)	FALSE
Solyc07g008210.4.1	2.51996	3.53348e-05	0.000999091	Tetratricopeptide repeat (TPR)-like superfamily protein (AHRD V3.3 *-* F4K464_ARATH)	TRUE
Solyc07g008240.3.1	2.51794	0.000134234	0.00282587	Non-symbiotic hemoglobin like (AHRD V3.3 *** A0A2R6R1Q2_ACTCH)	FALSE
Solyc08g021795.1.1	2.50926	5.93678e-05	0.00149602	Unknown protein	TRUE
Solyc07g065730.1.1	2.49342	0.00195031	0.0216575	Pentatricopeptide repeat (AHRD V3.3 *** A0A200R9Y9_9MAGN)	FALSE
Solyc02g014730.3.1	2.44844	0.00108076	0.0138809	Cytochrome P450 (AHRD V3.3 *** A0A2U1QJ26_ARTAN)	FALSE
Solyc08g016770.4.1	2.4129	0.002822	0.0284354	Serine decarboxylase (AHRD V3.3 *** A0A1U8F8Y3_CAPAN)	FALSE
Solyc05g053050.1.1	2.36791	0.00178111	0.0202157	Cyclin-dependent protein kinase inhibitor SMR4 (AHRD V3.3 *** SMR4_ARATH)	TRUE
Solyc05g013180.4.1	2.35262	0.00544233	0.0451617	Phosphate transporter PHO1-like protein 10 (AHRD V3.3 *** A0A2G2YDB9_CAPAN)	TRUE
Solyc08g062220.3.1	2.34249	1.56647e-06	8.25167e-05	Glycosyltransferase (AHRD V3.3 *** A0A218W5V3_PUNGR)	FALSE
Solyc09g075043.1.1	2.31333	0.000568546	0.00854019	Unknown protein	FALSE
Solyc02g077680.4.1	2.27711	0.00279512	0.0282851	Alpha-1,4 glucan phosphorylase (AHRD V3.3 *** A0A2G2XET2_CAPBA)	FALSE
Solyc07g056470.3.1	2.22948	2.33728e-10	5.76139e-08	Glutathione S-transferase-like protein (AHRD V3.3 *** A0A2K3N2T5_TRIPR)	FALSE
Solyc10g050970.1.1	2.22167	0.0048534	0.041715	Ethylene Response Factor D.4	TRUE
Solyc03g121900.1.1	2.21634	0.000170261	0.00337834	Bifunctional inhibitor/plant lipid transfer protein/seed storage helical domain containing protein (AHRD V3.3 *** A0A2P5DNS6_PARAD)	FALSE
Solyc11g072310.2.1	2.18478	0.000508626	0.00783602	gibberellin 20-oxidase-3	FALSE
Solyc02g069730.3.1	2.18453	1.70114e-11	7.2684e-09	CASP-like protein (AHRD V3.3 *** A0A2G3D4D7_CAPCH)	FALSE
Solyc09g014910.4.1	2.15204	0.00124855	0.0154676	Protein LURP-one-related 15 (AHRD V3.3 *** A0A1U8E7M0_CAPAN)	FALSE
Solyc10g076190.2.1	2.15087	0.00425364	0.0380041	Peroxidase (AHRD V3.3 *** K4D1W1_SOLLC)	TRUE
Solyc02g082450.3.1	2.15024	2.25069e-05	0.000682126	Auxin efflux carrier (AHRD V3.3 *** A0A200PYL2_9MAGN)	FALSE
Solyc07g009230.3.1	2.1443	4.14765e-13	3.06719e-10	Defensin-like protein 1 (AHRD V3.3 *** A0A2G2ZS54_CAPAN)	FALSE
Solyc12g014010.2.1	2.1181	0.00118918	0.0149351	Glycosyltransferase (AHRD V3.3 *** Q94IF2_TOBAC)	TRUE
Solyc12g009130.3.1	2.10085	0.00359321	0.0336515	Protein LURP-one-related 6 (AHRD V3.3 *** A0A2G2YV39_CAPAN)	FALSE
Solyc10g009580.4.1	2.08258	0.00377684	0.0349626	Glycosyltransferase (AHRD V3.3 *** A0A2I4F8D3_9ROSI)	FALSE
Solyc12g042600.2.1	2.03322	3.97118e-05	0.00109077	Glycosyltransferase (AHRD V3.3 *** B1Q468_ANTMA)	TRUE
Solyc08g077910.3.1	2.02729	0.000160383	0.00324026	Expansin-like B1 (AHRD V3.3 *** A0A2G2VI71_CAPBA)	FALSE
Solyc11g011340.2.1	2.02319	6.06838e-05	0.00152319	cultivar Rio Grande ELI3	FALSE
Solyc11g072140.3.1	1.99891	9.86933e-05	0.00222459	Protein kinase domain (AHRD V3.3 *** A0A200PR58_9MAGN)	FALSE
Solyc02g078250.4.1	1.95068	1.66908e-10	4.58448e-08	CASP-like protein (AHRD V3.3 *** A0A218WXP0_PUNGR)	FALSE
Solyc09g097770.3.1	1.92371	0.00397445	0.0363543	Cell wall protein (AHRD V3.3 *** Q40142_SOLLC)	FALSE
Solyc05g006870.3.1	1.91122	1.14483e-06	6.36174e-05	Thioredoxin (AHRD V3.3 *** A0A2G2VLZ1_CAPBA)	FALSE
Solyc09g009910.4.1	1.89001	0.00586217	0.0474819	ABC transporter ATP-binding protein (AHRD V3.3 *** A0A2T6DFU9_9BACT)	FALSE
Solyc10g084400.2.1	1.88979	1.17734e-05	0.000408606	Glutathione S-transferase (AHRD V3.3 *** Q76KW1_PEA)	FALSE
Solyc11g073060.3.1	1.88711	0.00246415	0.0256931	Zinc finger, C2H2 (AHRD V3.3 *** A0A2U1KDM0_ARTAN)	TRUE
Solyc09g097960.3.1	1.87572	3.55155e-12	1.84556e-09	NAD(P)-linked oxidoreductase, aldo/keto reductase family protein (AHRD V3.3 *** A0A1Y1HY98_KLENI)	FALSE
Solyc06g072880.2.1	1.8599	1.41826e-09	2.43472e-07	Glycosyltransferase (AHRD V3.3 *** A0A2G3CA94_CAPCH)	FALSE
Solyc12g099360.2.1	1.85243	3.02414e-05	0.000867438	AMP-dependent synthetase/ligase (AHRD V3.3 *** A0A200R265_9MAGN)	FALSE
Solyc08g065210.1.1	1.8513	0.00443276	0.0390778	Unknown protein	TRUE
Solyc01g150120.1.1	1.85111	0.005074	0.0429944	Transposon, En/Spm-like, Transposase-associated domain protein (AHRD V3.3 *-* A0A2U1N4P4_ARTAN)	FALSE
Solyc07g056500.4.1	1.84168	3.68533e-08	3.57868e-06	glutathione S-transferase T5	FALSE
Solyc04g078340.3.1	1.82633	3.87991e-11	1.4346e-08	Cytochrome P450 (AHRD V3.3 *-* A0A200QZM5_9MAGN)	FALSE
Solyc02g150143.1.1	1.8259	0.00163802	0.0189853	Unknown protein	FALSE
Solyc01g097390.4.1	1.82537	0.000348552	0.00585779	NAD(P)-linked oxidoreductase, aldo/keto reductase family protein (AHRD V3.3 *** A0A1Y1HY98_KLENI)	FALSE
Solyc09g082290.3.1	1.8212	0.000305527	0.00534651	Bifunctional inhibitor/lipid-transfer protein/seed storage 2S albumin superfamily protein (AHRD V3.3 *-* A0A2U1NA97_ARTAN)	TRUE
Solyc03g113130.3.1	1.78582	0.000507472	0.00782743	plant cysteine oxidase 2-like (AHRD V3.3 *** A0A2G3A1M0_CAPAN)	TRUE
Solyc03g116990.1.1	1.78345	0.000673527	0.0096858	Protein transport protein Sec61 subunit beta (AHRD V3.3 *-* A0A2G2Z9Z7_CAPAN)	TRUE
Solyc07g017990.3.1	1.78091	0.000800596	0.0110266	DNA ligase (AHRD V3.3 *** V4LG43_EUTSA)	TRUE
Solyc11g067190.3.1	1.77839	0.0025935	0.0267661	Fatty acyl-CoA reductase (AHRD V3.3 *** A0A2G3BAW0_CAPCH)	FALSE
Solyc09g098000.4.1	1.77428	1.91468e-06	9.61188e-05	NAD(P)-linked oxidoreductase, aldo/keto reductase family protein (AHRD V3.3 *** A0A1Y1HY98_KLENI)	TRUE
Solyc09g075420.3.1	1.77217	3.82044e-05	0.00105997	ethylene response factor E.1	TRUE
Solyc02g084640.4.1	1.76311	0.000315022	0.0054587	Aldehyde dehydrogenase (AHRD V3.3 *** A0A1U8FMX3_CAPAN)	FALSE
Solyc02g090210.3.1	1.76206	2.5222e-08	2.60192e-06	GDSL esterase/lipase (AHRD V3.3 *** A0A2G3D8U2_CAPCH)	FALSE
Solyc09g011520.3.1	1.75414	0.000106917	0.00237105	Glutathione S-transferase-like protein (AHRD V3.3 *** A8DUB0_SOLLC)	FALSE
Solyc01g086680.4.1	1.72211	0.00570474	0.0467939	glutathione S-transferase T1	FALSE
Solyc10g039390.1.1	1.72147	0.00292114	0.0290708	heavy metal-associated isoprenylated plant protein 3 (AHRD V3.3 *** A0A1S3YFF0_TOBAC)	FALSE
Solyc04g007810.1.1	1.71696	0.000155744	0.00315874	protein PELPK1 (AHRD V3.3 *-* XP_004242916.1)	TRUE
Solyc01g111990.3.1	1.7166	7.44371e-05	0.00177129	Alanine--tRNA ligase (AHRD V3.3 *** K3XV85_SETIT)	FALSE
Solyc12g045037.1.1	1.71556	1.75298e-05	0.000561763	Omega-6 fatty acid desaturase (AHRD V3.3 *** Q461Q1_HEVBR)	FALSE
Solyc07g005230.2.1	1.70171	5.78059e-10	1.16993e-07	Unknown protein	FALSE
Solyc08g078310.3.1	1.69309	6.57762e-06	0.000257049	Chromogranin (DUF1639) (AHRD V3.3 *-* O23587_ARATH)	TRUE
Solyc06g072870.1.1	1.6902	5.45797e-06	0.000220927	Glycosyltransferase (AHRD V3.3 *** A0A2G3CA94_CAPCH)	TRUE
Solyc04g051600.4.1	1.68684	3.13671e-07	2.22544e-05	tRNA(His) guanylyltransferase 1 (AHRD V3.3 *** A0A1U8DYC8_CAPAN)	FALSE
Solyc01g102910.4.1	1.67977	0.00261033	0.0268965	Germin-like protein subfamily 1 member (AHRD V3.3 *** A0A2K3JPE5_TRIPR)	FALSE
Solyc06g074170.3.1	1.66769	0.00102342	0.0132954	NAC domain-containing protein 40 (AHRD V3.3 *** A0A2G2ZDN9_CAPAN)	TRUE
Solyc11g011110.3.1	1.66057	0.000153379	0.00312066	GDSL esterase/lipase (AHRD V3.3 *** A0A1U8GTX9_CAPAN)	FALSE
Solyc06g066820.4.1	1.65935	0.00348394	0.0329816	Le3OH-13b-hydroxylase	TRUE
Solyc07g056480.3.1	1.64955	2.88435e-09	4.20131e-07	glutathione S-transferase/peroxidase	FALSE
Solyc01g101050.3.1	1.64458	0.000130675	0.00277317	Peroxidase (AHRD V3.3 *** K4B1D5_SOLLC)	TRUE
Solyc05g041200.4.1	1.61174	0.000615997	0.00905488	4-hydroxyphenylpyruvate dioxygenase (AHRD V3.3 *** A0A2G2WSP4_CAPBA)	TRUE
Solyc04g082940.3.1	1.60851	5.10925e-06	0.000212172	Cysteine/Histidine-rich C1 domain family protein (AHRD V3.3 *** F4HWC5_ARATH)	TRUE
Solyc04g014330.1.1	1.59476	2.1412e-05	0.000656599	protein PELPK2-like (AHRD V3.3 *** XP_010319535.1)	TRUE
Solyc03g097610.3.1	1.58592	0.0024682	0.0257137	Bidirectional sugar transporter SWEET (AHRD V3.3 *** M1D4D6_SOLTU)	FALSE
Solyc07g061720.3.1	1.58088	0.00218236	0.0236104	gibberellin 2-oxidase 4	FALSE
Solyc01g067850.2.1	1.57924	0.000142029	0.00295166	Peroxidase (AHRD V3.3 *** K4AX33_SOLLC)	FALSE
Solyc04g014290.1.1	1.56953	0.00019162	0.00372903	protein PELPK1-like (AHRD V3.3 *** XP_010319537.1)	TRUE
Solyc09g073030.4.1	1.56583	3.74578e-05	0.00104377	Unknown protein	TRUE
Solyc07g056190.3.1	1.54966	0.000839723	0.011378	Heavy metal-associated isoprenylated plant protein (AHRD V3.3 *** A0A2R6QEC1_ACTCH)	FALSE
Solyc06g069070.1.1	1.54821	4.48641e-06	0.000192116	Bifunctional inhibitor/lipid-transfer protein/seed storage 2S albumin superfamily protein (AHRD V3.3 *** A0A1I9LP30_ARATH)	FALSE
Solyc09g092500.1.1	1.54793	5.97116e-09	7.81003e-07	UDP-glycosyltransferase 75C1 (AHRD V3.3 *** U75C1_SOLLC)	FALSE
Solyc03g078100.3.1	1.54365	0.00338708	0.0323543	Pectinesterase (AHRD V3.3 *** A0A200PXC9_9MAGN)	TRUE
Solyc01g110860.1.1	1.53634	0.00351633	0.0331252	Auxin-responsive protein SAUR21 (AHRD V3.3 *** A0A2G2XY50_CAPAN)	FALSE
Solyc02g093420.4.1	1.53431	0.00026059	0.00473084	NAC domain-containing protein 10 (AHRD V3.3 *** A0A2G3ACK5_CAPAN)	TRUE
Solyc04g014320.1.1	1.52978	0.000122385	0.0026233	protein PELPK2-like (AHRD V3.3 *** XP_010319535.1)	TRUE
Solyc02g090020.4.1	1.52149	0.00190352	0.0212661	stress regulated protein AY873991	FALSE
Solyc01g107820.2.1	1.50988	0.00139186	0.0167362	TOMATO WOUND-INDUCED 1	FALSE
Solyc06g076800.3.1	1.50608	7.45602e-05	0.00177203	Cytochrome P450 (AHRD V3.3 *** A0A200R4M3_9MAGN)	FALSE
Solyc06g069350.3.1	1.49767	0.000738092	0.0103486	Unknown protein	TRUE
Solyc07g017980.1.1	1.47858	1.31252e-05	0.000440416	protein PELPK1 (AHRD V3.3 --* XP_004242916.1)	TRUE
Solyc06g063060.3.1	1.47343	0.000643987	0.00937315	Dormancy/auxin associated protein (AHRD V3.3 *-* A0A2K3JP12_TRIPR)	TRUE
Solyc12g045035.1.1	1.45238	0.000853616	0.0115407	Fatty acid desaturase (AHRD V3.3 *** A0A200QRI1_9MAGN)	FALSE
Solyc00g500103.1.1	1.44756	0.00559909	0.0461044	NADH-ubiquinone oxidoreductase chain 5 (AHRD V3.3 *-* A0A0C5ARN6_HYONI)	TRUE
Solyc06g066460.3.1	1.4466	4.39475e-05	0.00118179	Nuclear poly(A) polymerase 4 (AHRD V3.3 *-* A0A2G2ZBI7_CAPAN)	TRUE
Solyc08g068730.1.1	1.42365	0.00100336	0.0131324	Tyramine n-hydroxycinnamoyl transferase (AHRD V3.3 *** Q5D8C0_CAPAN)	FALSE
Solyc05g010330.4.1	1.42161	6.27994e-05	0.00155598	Peroxidase (AHRD V3.3 *** K4BXK6_SOLLC)	FALSE
Solyc07g056420.4.1	1.41653	8.72806e-06	0.000323342	glutathione S-transferase AY082341	FALSE
Solyc04g045580.4.1	1.4032	0.000859254	0.0115936	phosphoribosylformylglycinamidine synthase (AHRD V3.3 *** AT1G27385.1)	TRUE
Solyc01g106920.4.1	1.40301	0.000805089	0.0110647	Nucleobase-ascorbate transporter 8 (AHRD V3.3 *** A0A1U8DZ27_CAPAN)	FALSE
Solyc09g014350.3.1	1.39754	0.00167562	0.0192686	Glycerol-3-phosphate acyltransferase, expressed (AHRD V3.3 *** D8L9N9_WHEAT)	TRUE
Solyc09g092480.1.1	1.39715	3.47711e-06	0.000156202	Glycosyltransferase (AHRD V3.3 *** A0A2I4GJH4_9ROSI)	FALSE
Solyc00g500184.1.1	1.39562	0.00167213	0.0192457	NADH dehydrogenase subunit 7 (AHRD V3.3 *** A0A0C5B9X5_9SOLA)	FALSE
Solyc03g031890.3.1	1.38939	0.00469703	0.0407904	Cold induced protein-like (AHRD V3.3 *-* Q94JH8_ORYSJ)	TRUE
Solyc12g013690.2.1	1.38433	1.48197e-05	0.000486243	Monooxygenase (AHRD V3.3 *** Q8H9C4_SOLTU)	FALSE
Solyc06g051260.4.1	1.38259	0.00428077	0.0381932	bHLH transcription factor 043	TRUE
Solyc07g021650.3.1	1.37842	0.00526446	0.0440853	Unknown protein	TRUE
Solyc01g058720.4.1	1.37759	2.80832e-12	1.54273e-09	Calcium-binding EF-hand (AHRD V3.3 *** A0A2U1NQC6_ARTAN)	TRUE
Solyc01g096730.2.1	1.37293	3.15559e-07	2.23061e-05	protein ZINC INDUCED FACILITATOR-LIKE 1-like (AHRD V3.3 *** A0A2I4H204_9ROSI)	FALSE
Solyc09g065410.4.1	1.37088	0.00129032	0.0158221	Non-specific lipid-transfer protein-like protein (AHRD V3.3 *** A0A1J6J624_NICAT)	TRUE
Solyc07g017570.2.1	1.37084	1.03196e-12	6.61386e-10	defensin-like protein 1 (AHRD V3.3 -** A0A1S3YK59_TOBAC)	FALSE
Solyc02g091725.1.1	1.36668	0.00218892	0.0236574	Unknown protein	TRUE
Solyc10g084240.3.1	1.33778	0.000793112	0.0109371	Peroxidase (AHRD V3.3 *** K4D3L0_SOLLC)	FALSE
Solyc03g065250.4.1	1.32857	0.00064681	0.00940713	Fatty acid hydroxylase superfamily (AHRD V3.3 *** A0A2U1L8N4_ARTAN)	FALSE
Solyc06g036340.4.1	1.32807	0.0017585	0.0200419	Pentatricopeptide repeat (PPR) superfamily protein (AHRD V3.3 *-* A0A2U1LU47_ARTAN)	TRUE
Solyc09g008770.3.1	1.31931	0.000246063	0.0045414	Late embryogenesis abundant protein (AHRD V3.3 *** A0A200R5C6_9MAGN)	TRUE
Solyc09g089550.4.1	1.31892	0.00264348	0.0272089	Zinc-finger homeodomain protein 1 (AHRD V3.3 *-* A0A2G2W0R2_CAPBA)	TRUE
Solyc06g035960.3.1	1.31418	0.00274848	0.0279498	Oxalate--CoA ligase (AHRD V3.3 *** A0A1U8FIW0_CAPAN)	TRUE
Solyc12g006380.2.1	1.31404	0.00183244	0.0207006	2-oxoglutarate-dependent dioxygenase	TRUE
Solyc06g074290.1.1	1.3047	0.00209821	0.0228828	Unknown protein	FALSE
Solyc01g067860.3.1	1.29614	2.9668e-05	0.000857784	Peroxidase (AHRD V3.3 *** K4AX34_SOLLC)	TRUE
Solyc01g101260.2.1	1.2949	8.31082e-16	1.45266e-12	hypothetical protein (AHRD V3.3 --* AT5G26620.1)	FALSE
Solyc09g065440.4.1	1.29247	0.000455271	0.00719268	Bifunctional inhibitor/lipid-transfer protein/seed storage 2S albumin superfamily protein (AHRD V3.3 *-* A0A2U1NA97_ARTAN)	TRUE
Solyc03g119340.3.1	1.27756	0.00328902	0.0317045	Cysteine-rich receptor-like protein kinase 8 (AHRD V3.3 *** A0A2G3A3B2_CAPAN)	TRUE
Solyc08g005120.3.1	1.27325	0.00363159	0.0339613	NAD(P)-binding Rossmann-fold superfamily protein (AHRD V3.3 *-* A0A2U1LGD5_ARTAN)	FALSE
Solyc12g099280.2.1	1.27224	0.0010246	0.0133018	Fip1 domain-containing protein (AHRD V3.3 *** A0A1Q3BSA1_CEPFO)	TRUE
Solyc10g009240.3.1	1.26828	0.00551509	0.0455884	3-ketoacyl-CoA synthase (AHRD V3.3 *** A0A1U8ENL9_CAPAN)	FALSE
Solyc01g109790.3.1	1.26585	4.99929e-08	4.64355e-06	ADP-glucose pyrophosphorylase large subunit 1	FALSE
Solyc01g094700.4.1	1.26178	2.80253e-05	0.000823607	Glycerol-3-phosphate acyltransferase, expressed (AHRD V3.3 *** D8L9N9_WHEAT)	TRUE
Solyc07g005410.3.1	1.2515	0.000507661	0.00782743	Cytochrome c oxidase%2C subunit Vib family protein (AHRD V3.3 *** AT5G58005.2)	FALSE
Solyc05g015720.2.1	1.24662	0.00585482	0.0474786	MADS-box transcription factor (AHRD V3.3 *** F1T119_9ERIC)	TRUE
Solyc10g083960.2.1	1.24594	0.00122371	0.0152196	Phosphoadenosine phosphosulfate (PAPS) reductase family protein (AHRD V3.3 *** Q9LZE4_ARATH)	FALSE
Solyc01g105770.2.1	1.24374	0.00380057	0.0351484	IgA FC receptor (AHRD V3.3 *-* A0A1J3K238_NOCCA)	TRUE
Solyc11g068620.2.1	1.24092	5.39021e-06	0.000219107	NAC domain (AHRD V3.3 *** A0A200Q6H1_9MAGN)	FALSE
Solyc01g066910.3.1	1.22769	0.00387927	0.0356023	Bifunctional inhibitor/plant lipid transfer protein/seed storage helical domain containing protein (AHRD V3.3 *** A0A2P5CY45_TREOI)	FALSE
Solyc05g013690.4.1	1.22705	9.77572e-07	5.57738e-05	GDSL esterase/lipase (AHRD V3.3 *** A0A2R6REU1_ACTCH)	FALSE
Solyc11g008680.2.1	1.22271	0.00363909	0.034015	Acyl-[acyl-carrier-protein] desaturase (AHRD V3.3 *** A0A2G3B0E0_CAPCH)	FALSE
Solyc02g090600.2.1	1.21662	0.000529226	0.00805018	Precursor of CEP10 (AHRD V3.3 --* PCP10_ARATH)	TRUE
Solyc05g009650.4.1	1.20982	0.00589597	0.047651	Unknown protein	TRUE
Solyc06g081980.1.1	1.20673	8.04963e-10	1.474e-07	Pyridoxal 5'-phosphate synthase pdxS subunit (AHRD V3.3 *** U9T0K3_RHIID)	FALSE
Solyc09g074850.4.1	1.20379	0.000152833	0.00311284	Glutathione S-transferase (AHRD V3.3 *** A0A2G3CTS1_CAPCH)	FALSE
Solyc07g052960.3.1	1.19853	0.00459862	0.0401169	GRAS family TF	FALSE
Solyc11g010380.2.1	1.19821	1.81581e-06	9.18753e-05	Protein DETOXIFICATION (AHRD V3.3 *** A0A328DDG5_9ASTE)	FALSE
Solyc11g007530.2.1	1.19803	0.00612041	0.0488286	RING/U-box superfamily protein (AHRD V3.3 *-* A0A178VMT5_ARATH)	TRUE
Solyc06g008900.4.1	1.19414	0.00103039	0.0133675	RING/U-box superfamily protein (AHRD V3.3 *** A0A1P8B7R8_ARATH)	TRUE
Solyc09g065000.4.1	1.18754	0.0039647	0.0362824	Eukaryotic aspartyl protease family protein (AHRD V3.3 *** A0A2U1ML86_ARTAN)	FALSE
Solyc01g005470.3.1	1.18491	0.00376961	0.0349293	protein PLANT CADMIUM RESISTANCE 2-like (AHRD V3.3 *** A0A1U8ETE7_CAPAN)	FALSE
Solyc02g089350.3.1	1.18133	0.000545041	0.00825158	Gibberellin regulated protein (AHRD V3.3 *** A0A2U1PE48_ARTAN)	FALSE
Solyc03g097570.3.1	1.16727	1.18731e-05	0.000411324	Bidirectional sugar transporter SWEET (AHRD V3.3 *** A0A142DVH6_SOLTU)	FALSE
Solyc03g005450.3.1	1.16257	6.97041e-05	0.00168111	Cellulose synthase (AHRD V3.3 *** A0A200Q4F9_9MAGN)	TRUE
Solyc12g096980.3.1	1.16171	0.00104216	0.0134827	auxin-regulated IAA11	TRUE
Solyc10g086090.2.1	1.15548	2.45666e-07	1.84242e-05	Ethylene-responsive proteinase inhibitor 1 (AHRD V3.3 *** A0A2G2VU06_CAPBA)	FALSE
Solyc09g064940.2.1	1.15494	7.01512e-05	0.00168811	Phenazine biosynthesis PhzF protein (AHRD V3.3 *** A0A200Q4V2_9MAGN)	FALSE
Solyc09g090290.3.1	1.15371	0.00185694	0.0209036	RNA-binding (RRM/RBD/RNP motifs) family protein (AHRD V3.3 *-* AT3G23370.1)	TRUE
Solyc03g097030.3.1	1.15199	0.000810466	0.0111227	4-coumarate:CoA ligase (AHRD V3.3 *** Q42880_LITER)	TRUE
Solyc08g008610.3.1	1.15159	0.00544111	0.0451617	Alpha/beta-Hydrolases superfamily protein (AHRD V3.3 *** A0A2U1LI82_ARTAN)	FALSE
Solyc12g042380.2.1	1.14806	7.4429e-09	9.54031e-07	Stress up-regulated Nod 19 (AHRD V3.3 *** A0A200R3S5_9MAGN)	FALSE
Solyc06g051425.1.1	1.14762	0.00164311	0.0190085	Unknown protein	TRUE
Solyc00g500228.1.1	1.14678	0.00369261	0.0343648	Ribosomal protein L2 (AHRD V3.3 *** A0A290WL33_SOLLC)	TRUE
Solyc06g050530.3.1	1.14023	0.00196462	0.0217717	Laccase (AHRD V3.3 *** K4C5J7_SOLLC)	FALSE
Solyc04g150161.1.1	1.13825	5.98802e-10	1.18693e-07	Unknown protein	TRUE
Solyc11g071710.2.1	1.13292	7.8605e-06	0.000296341	Thylakoid lumenal P17.1 protein (AHRD V3.3 *** Q9LXV9_ARATH)	FALSE
Solyc09g011630.3.1	1.13193	0.00264951	0.0272127	Glutation-S-transferase	FALSE
Solyc12g044820.3.1	1.12973	3.06846e-10	7.19479e-08	ABC transporter C family member 8 (AHRD V3.3 *** A0A2G2W0I8_CAPBA)	FALSE
Solyc02g062120.3.1	1.1279	0.000510213	0.00784789	Membrane fusion protein Use1 (AHRD V3.3 *-* A0A1P8AP56_ARATH)	FALSE
Solyc04g082220.3.1	1.12438	0.00197478	0.0218339	Lysine histidine transporter-like 8 (AHRD V3.3 *** A0A2G2X1G9_CAPBA)	FALSE
Solyc01g086670.3.1	1.1235	0.00024714	0.00454565	Unknown protein	FALSE
Solyc05g012500.3.1	1.12258	0.00121967	0.0152178	WRKY transcription factor 57	TRUE
Solyc07g065320.4.1	1.12159	0.000462487	0.00727083	ABC transporter C family member 3 (AHRD V3.3 *** A0A2G2WFH5_CAPBA)	TRUE
Solyc04g079240.3.1	1.1204	0.000114274	0.00249392	Patatin (AHRD V3.3 *** A0A2G2X0P5_CAPBA)	TRUE
Solyc01g096420.3.1	1.11884	2.83971e-07	2.0526e-05	NADPH quinone oxidoreductase (AHRD V3.3 *** A0A2K3LWY2_TRIPR)	FALSE
Solyc11g071350.1.1	1.10916	6.74622e-05	0.00165025	Aluminum-activated malate transporter (AHRD V3.3 *** A0A200Q9N0_9MAGN)	FALSE
Solyc04g080540.2.1	1.10809	0.00266715	0.0273501	DNA polymerase epsilon catalytic subunit A (AHRD V3.3 *** AT1G19530.2)	TRUE
Solyc01g096940.4.1	1.10292	0.00420722	0.0376944	Protein kinase (AHRD V3.3 *** Q2HVC0_MEDTR)	TRUE
Solyc03g043640.3.1	1.1028	0.00270685	0.0275953	Heavy metal-associated isoprenylated plant protein (AHRD V3.3 *** A0A2R6PA46_ACTCH)	FALSE
Solyc03g007775.2.1	1.10279	0.00489974	0.0420193	membrane-associated kinase regulator (AHRD V3.3 *** AT5G52900.1)	FALSE
Solyc04g080990.2.1	1.0963	0.000145537	0.00298957	S-type anion channel SLAH1 (AHRD V3.3 *** A0A2G3CQY6_CAPCH)	FALSE
Solyc03g078490.4.1	1.09273	7.23059e-05	0.00173345	Glycosyltransferase (AHRD V3.3 *** A0A2I4HTK4_9ROSI)	TRUE
Solyc07g062750.4.1	1.09167	0.000989098	0.01299	Polynucleotidyl transferase%2C ribonuclease H-like superfamily protein (AHRD V3.3 *** AT3G15140.1)	FALSE
Solyc09g008780.4.1	1.09161	2.65229e-07	1.94639e-05	Sulfite exporter TauE/SafE family protein (AHRD V3.3 *** A0A2U1KFX4_ARTAN)	FALSE
Solyc02g092310.4.1	1.09098	0.00459474	0.0401065	Pentatricopeptide repeat-containing protein, chloroplastic (AHRD V3.3 *** A0A2G2XHA6_CAPBA)	TRUE
Solyc09g075540.1.1	1.08985	0.00412846	0.0372667	COBRA-like protein 8 (AHRD V3.3 *** A0A2G3BWC4_CAPCH)	FALSE
Solyc07g009443.1.1	1.08713	0.000877807	0.0117943	G-type lectin S-receptor-like serine/threonine-protein kinase (AHRD V3.3 *** A0A2G2Z069_CAPAN)	FALSE
Solyc03g097500.3.1	1.08306	0.00516217	0.0434558	Transferase (AHRD V3.3 *** A0A200QGG9_9MAGN)	FALSE
Solyc07g065620.4.1	1.07218	0.000461641	0.00726645	Poly(A)-specific ribonuclease PARN (AHRD V3.3 *** A0A2G2WFF7_CAPBA)	TRUE
Solyc02g081690.1.1	1.07102	0.000983439	0.0129422	Glycosyltransferase (AHRD V3.3 *** A0A2I4E012_9ROSI)	FALSE
Solyc01g090630.4.1	1.06703	1.4653e-12	9.08818e-10	2-oxoglutarate (2OG) and Fe(II)-dependent oxygenase superfamily protein (AHRD V3.3 *** Q9C938_ARATH)	FALSE
Solyc04g014770.1.1	1.06504	2.82649e-07	2.05075e-05	Unknown protein	FALSE
Solyc01g060260.4.1	1.06363	0.00557602	0.0459735	Glycine-rich protein family (AHRD V3.3 *-* AT5G49350.2)	TRUE
Solyc07g065340.1.1	1.06054	0.000597406	0.00886291	Serine acetyltransferase (AHRD V3.3 *** A0A2K3M2Y7_TRIPR)	TRUE
Solyc04g078460.3.1	1.05875	0.000120533	0.00259518	Isoaspartyl peptidase/L-asparaginase (AHRD V3.3 *** A0A1U8GBV5_CAPAN)	TRUE
Solyc05g009350.4.1	1.05845	6.61248e-07	4.04899e-05	Zinc finger transcription factor 37	TRUE
Solyc06g071990.4.1	1.05501	3.18331e-07	2.24196e-05	P-loop containing nucleoside triphosphate hydrolases superfamily protein (AHRD V3.3 *-* A0A2U1N2C4_ARTAN)	TRUE
Solyc05g005700.4.1	1.05393	7.39279e-05	0.00176573	Aldehyde dehydrogenase (AHRD V3.3 *** Q43274_MAIZE)	FALSE
Solyc03g083480.4.1	1.05326	0.00106418	0.0136863	LEAF RUST 10 DISEASE-RESISTANCE LOCUS RECEPTOR-LIKE PROTEIN KINASE-like 2.1 (AHRD V3.3 *** A0A1U8FAX0_CAPAN)	FALSE
Solyc03g097930.3.1	1.05226	0.000297501	0.00526224	Unknown protein	TRUE
Solyc09g082720.3.1	1.05196	1.05184e-07	8.94858e-06	NAD(P)-linked oxidoreductase, aldo/keto reductase family protein (AHRD V3.3 *** A0A1Y1HY98_KLENI)	FALSE
Solyc02g080520.4.1	1.05185	0.00611817	0.0488286	Actin cytoskeleton-regulatory complex pan-like protein (AHRD V3.3 *** Q9LPT5_ARATH)	TRUE
Solyc01g081600.3.1	1.04998	0.0044641	0.0393361	Non-specific lipid-transfer protein (AHRD V3.3 *** K4AY52_SOLLC)	FALSE
Solyc01g079880.3.1	1.04751	6.79631e-14	7.25959e-11	Aluminum induced protein with YGL and LRDR motifs (AHRD V3.3 *** Q94BR2_ARATH)	FALSE
Solyc03g121040.4.1	1.04475	8.04033e-07	4.75666e-05	Taurine catabolism dioxygenase TauD/TfdA (AHRD V3.3 *** A0A200QPY7_9MAGN)	TRUE
Solyc10g076220.3.1	1.04377	0.000428164	0.00684314	Peroxidase (AHRD V3.3 *** K4D1W4_SOLLC)	TRUE
Solyc06g009070.3.1	1.04212	5.16047e-05	0.00132825	Zinc finger transcription factor 41	FALSE
Solyc12g062200.1.1	1.03839	0.00257516	0.0266197	Unknown protein	TRUE
Solyc06g071060.1.1	1.03737	2.29831e-08	2.41473e-06	NAD(P)-binding Rossmann-fold superfamily protein (AHRD V3.3 *** A0A2U1Q367_ARTAN),Pfam:PF13561	FALSE
Solyc01g080480.4.1	1.03642	0.00133238	0.0162137	DNAse I-like superfamily protein (AHRD V3.3 *** A0A2U1Q9H2_ARTAN)	TRUE
Solyc02g079240.1.1	1.03271	0.00146961	0.0175069	Unknown protein	TRUE
Solyc03g083100.3.1	1.03179	0.0016223	0.0188585	SUN-like protein 10	TRUE
Solyc09g064920.3.1	1.02947	0.00543621	0.0451499	transcription factor UNE12-like (AHRD V3.3 *** A0A2I4DEZ5_9ROSI)	FALSE
Solyc12g017370.3.1	1.02138	0.000672687	0.00968096	Myb family transcription factor APL (AHRD V3.3 *** A0A1U8G1X9_CAPAN)	TRUE
Solyc05g013640.1.1	1.02117	1.33542e-10	3.89032e-08	Unknown protein	TRUE
Solyc02g084780.4.1	1.0199	0.00624704	0.0494491	Peroxidase (AHRD V3.3 *** K4BAZ3_SOLLC)	TRUE
Solyc10g007890.4.1	1.01986	0.00012118	0.00260338	Cytochrome P450 (AHRD V3.3 *** A0A2U1MAN7_ARTAN)	FALSE
Solyc09g090080.1.1	1.01506	0.00401385	0.0366102	Phosphate transporter (AHRD V3.3 *** Q9AYT3_TOBAC)	TRUE
Solyc04g009860.4.1	1.00911	6.35367e-06	0.000251362	2-oxoglutarate (2OG) and Fe(II)-dependent oxygenase superfamily protein (AHRD V3.3 *** A0A2U1QA13_ARTAN)	FALSE
Solyc02g094000.1.1	1.00807	0.00498146	0.0425384	EF_hand_5 domain-containing protein/EF_hand_6 domain-containing protein (AHRD V3.3 *** A0A1Q3B940_CEPFO)	FALSE
Solyc10g084060.2.1	1.00694	4.3094e-10	9.52377e-08	cysteine-rich/transmembrane domain A-like protein (AHRD V3.3 -** AT2G32210.1)	FALSE
Solyc10g081575.1.1	1.00414	0.00100682	0.0131518	Unknown protein	FALSE
Solyc01g006050.2.1	1.00013	0.00575275	0.0470066	transmembrane protein 45B-like (AHRD V3.3 *** A0A2I4DQK0_9ROSI)	FALSE
Solyc01g008550.4.1	1.0001	3.19538e-07	2.24225e-05	phenylacetaldehyde reductase 2	FALSE

## Sheet: DOWN
Supplemental Table S5. Down-regulated DEGs of E3H30m vs W3H30m in root (log2 fold change ≦ -1.0, p_value < 0.05, p_adj < 0.05).
Geneid	log2FoldChange	p_value	p_adj	Annotation
Solyc01g097700.1.1	-4.14142	4.58218e-05	0.00121687	Extensin-like protein Dif10 (AHRD V3.3 *-* Q43504_SOLLC)
Solyc06g054500.1.1	-4.02235	7.66317e-07	4.57577e-05	Peroxidase (AHRD V3.3 *** K4C6D6_SOLLC)
Solyc09g091340.1.1	-3.8399	1.475e-05	0.000484783	Plant self-incompatibility S1 (AHRD V3.3 *** A0A118JZS1_CYNCS)
Solyc03g118760.4.1	-3.62715	0.00051946	0.00794564	Tubulin beta chain (AHRD V3.3 *** A0A1U8F7H6_CAPAN)
Solyc05g008150.3.1	-3.43413	5.1375e-10	1.08548e-07	Fruit-specific protein (AHRD V3.3 *** A0A2G2VKF4_CAPBA)
Solyc03g098010.3.1	-3.4279	0.00024966	0.00457599	phosphate starvation inducible gene TPSI1
Solyc03g091020.1.1	-3.31989	0.00351185	0.0331252	Bifunctional inhibitor/lipid-transfer protein/seed storage 2S albumin superfamily protein (AHRD V3.3 *** A0A2U1PU47_ARTAN)
Solyc12g038680.1.1	-3.17939	1.04633e-08	1.25558e-06	Cysteine/Histidine-rich C1 domain family protein (AHRD V3.3 *-* Q9FIY8_ARATH)
Solyc10g032565.1.1	-3.17423	6.91791e-05	0.00167309	2-oxoglutarate (2OG) and Fe(II)-dependent oxygenase superfamily protein (AHRD V3.3 *** A0A2U1P7E5_ARTAN)
Solyc07g052250.4.1	-3.145	6.65936e-06	0.000259189	Unknown protein
Solyc07g061800.4.1	-3.10819	0.000305668	0.00534651	Heme-binding-like protein (AHRD V3.3 *** A0A2I0X1C8_9ASPA)
Solyc09g091670.3.1	-3.07029	0.00414543	0.0373672	Pleiotropic drug resistance protein (AHRD V3.3 *** C8CA13_CUCSA)
Solyc11g073150.1.1	-3.04598	1.86689e-08	1.99415e-06	Late embryogenesis abundant protein-related / LEA protein-like protein (AHRD V3.3 *** A0A178VGJ3_ARATH)
Solyc11g012240.1.1	-2.99728	0.000623145	0.00912506	MBOAT (Membrane bound O-acyl transferase) family protein (AHRD V3.3 *** A0A2U1LYZ9_ARTAN)
Solyc03g096760.1.1	-2.95296	7.58902e-10	1.42437e-07	Protein RESPONSE TO LOW SULFUR 2 (AHRD V3.3 *-* LSU2_ARATH)
Solyc06g082820.4.1	-2.8734	0.00159476	0.0186171	MLO-like protein (AHRD V3.3 *** K4CAD7_SOLLC)
Solyc03g119180.1.1	-2.86446	0.000348841	0.00585779	Unknown protein
Solyc06g072845.1.1	-2.82969	4.41567e-07	2.91753e-05	hypothetical protein (AHRD V3.3 *** AT5G17165.1)
Solyc05g052300.4.1	-2.82757	4.25977e-09	5.93497e-07	Amino acid transporter (AHRD V3.3 *** S8C1J4_9LAMI)
Solyc06g060900.1.1	-2.76563	9.67041e-14	9.78595e-11	Unknown protein
Solyc12g019620.2.1	-2.75039	0.00291689	0.0290524	Pleiotropic drug resistance protein (AHRD V3.3 *** C8CA13_CUCSA)
Solyc01g005860.2.1	-2.72471	2.85015e-11	1.14166e-08	Unknown protein
Solyc11g007210.3.1	-2.67934	1.24722e-14	1.84463e-11	Peroxidase (AHRD V3.3 *** K4D4Y2_SOLLC)
Solyc01g097710.1.1	-2.67203	8.78143e-07	5.13193e-05	Extensin-like protein Dif10 (AHRD V3.3 *-* Q43504_SOLLC)
Solyc02g081890.4.1	-2.66925	1.32942e-05	0.000444993	Core-2/I-branching beta-16-N-acetylglucosaminyltransferase family protein (AHRD V3.3 *** B6ST68_MAIZE)
Solyc01g097720.1.1	-2.63698	3.79749e-14	4.5634e-11	Extensin-like protein Dif10 (AHRD V3.3 *-* Q43504_SOLLC)
Solyc10g074826.1.1	-2.62687	9.932e-17	2.12181e-13	Unknown protein
Solyc10g044447.1.1	-2.57318	0.00151783	0.0179922	2-oxoglutarate (2OG) and Fe(II)-dependent oxygenase superfamily protein (AHRD V3.3 *** A0A2U1P7E5_ARTAN)
Solyc09g090005.1.1	-2.53334	7.25043e-11	2.44569e-08	Germin-like protein subfamily 1 member 20 (AHRD V3.3 *** A0A2G3CSH1_CAPCH)
Solyc01g095840.2.1	-2.52696	4.24803e-06	0.000183544	RING/U-box superfamily protein (AHRD V3.3 *** A0A2U1MJ85_ARTAN)
Solyc03g090990.1.1	-2.51461	5.71897e-10	1.16977e-07	Bifunctional inhibitor/lipid-transfer protein/seed storage 2S albumin superfamily protein (AHRD V3.3 *** A0A2U1PU47_ARTAN)
Solyc11g006300.2.1	-2.49702	0.00116143	0.0146624	3-oxo-5-alpha-steroid 4-dehydrogenase (AHRD V3.3 *** A0A200PYH0_9MAGN)
Solyc08g005330.2.1	-2.47331	0.00136933	0.0165482	Histidinol-phosphate aminotransferase, chloroplastic (AHRD V3.3 *** A0A2G2XLG4_CAPBA)
Solyc01g067440.4.1	-2.45764	4.42619e-05	0.00118858	Glutaredoxin (AHRD V3.3 *** A0A2G9GSG9_9LAMI)
Solyc03g091010.1.1	-2.43941	4.52387e-07	2.97878e-05	Bifunctional inhibitor/lipid-transfer protein/seed storage 2S albumin superfamily protein (AHRD V3.3 *** A0A2U1PU47_ARTAN)
Solyc11g007220.2.1	-2.43882	5.30318e-10	1.09639e-07	Peroxidase (AHRD V3.3 *** K4D4Y3_SOLLC)
Solyc01g107220.2.1	-2.42493	2.42309e-11	9.9125e-09	extensin-2-like (AHRD V3.3 *-* XP_004231387.1)
Solyc11g069970.1.1	-2.41886	1.25565e-05	0.000426545	Late embryogenesis abundant (LEA) hydroxyproline-rich glycoprotein family (AHRD V3.3 *** A0A2U1MMJ0_ARTAN)
Solyc07g045430.4.1	-2.39539	2.97922e-07	2.13737e-05	Nudix hydrolase (AHRD V3.3 *** A0A2U1KQS6_ARTAN)
Solyc01g067540.2.1	-2.3872	0.00488534	0.0419243	Ethylene-responsive transcription factor (AHRD V3.3 *** A0A2G3DID8_CAPCH)
Solyc09g082760.3.1	-2.38223	0.000959491	0.0127229	Aspartic proteinase A1 (AHRD V3.3 *** A0A2G3CJM2_CAPCH)
Solyc07g014690.3.1	-2.37986	0.00403579	0.0367049	Na+ transporter (AHRD V3.3 *** S0CPS1_SOLLC)
Solyc10g084200.2.1	-2.37976	4.39326e-13	3.12849e-10	Peroxidase (AHRD V3.3 *** K4D3K6_SOLLC)
Solyc07g006710.2.1	-2.35971	1.56607e-09	2.61818e-07	Pathogenesis-related protein PR-1 (AHRD V3.3 *** A0A2G3BX31_CAPCH)
Solyc01g097690.2.1	-2.3265	2.60973e-10	6.27217e-08	Extensin-like protein Dif10 (AHRD V3.3 *-* Q43504_SOLLC)
Solyc04g150122.1.1	-2.32616	0.00159421	0.0186171	Unknown protein
Solyc07g066640.3.1	-2.30891	0.000681726	0.00975991	transglycosylase (AHRD V3.3 *** AT1G16290.2)
Solyc03g082790.4.1	-2.30886	1.26474e-05	0.000427349	extensin-like 54
Solyc01g005880.1.1	-2.30436	1.6058e-10	4.47459e-08	Extensin-like protein Dif10 (AHRD V3.3 *-* Q43504_SOLLC)
Solyc10g084190.1.1	-2.30369	2.44894e-12	1.38652e-09	Unknown protein
Solyc12g089270.1.1	-2.29884	0.00448099	0.0394487	Auxin responsive SAUR protein (AHRD V3.3 *** A0A2U1P3N8_ARTAN)
Solyc03g114830.3.1	-2.29698	0.00174975	0.0199777	FRUITFULL-like MADS-box 2
Solyc01g090350.3.1	-2.28962	4.18997e-05	0.0011427	Non-specific lipid-transfer protein (AHRD V3.3 *** K4AYX6_SOLLC)
Solyc03g119470.2.1	-2.28794	0.00403931	0.0367049	DUF1666 domain-containing protein (AHRD V3.3 *** A0A1Q3CZB6_CEPFO)
Solyc01g005850.2.1	-2.28221	4.01884e-06	0.000176014	Extensin-like protein Dif54 (AHRD V3.3 *-* Q43505_SOLLC)
Solyc05g006190.2.1	-2.27397	1.56608e-09	2.61818e-07	Unknown protein
Solyc02g080910.4.1	-2.26653	9.90787e-11	3.12293e-08	Pectate lyase (AHRD V3.3 *** A0A2G3A9B6_CAPAN)
Solyc03g093070.1.1	-2.26024	1.02865e-07	8.82943e-06	Bifunctional inhibitor/lipid-transfer protein/seed storage 2S albumin superfamily protein (AHRD V3.3 *** A0A2U1PU47_ARTAN)
Solyc12g098290.1.1	-2.25378	2.28397e-07	1.74262e-05	acanthoscurrin-1-like (AHRD V3.3 *-* XP_010314853.1)
Solyc10g009480.4.1	-2.24511	7.04791e-08	6.35749e-06	Cytochrome and DOMON domain-containing protein (AHRD V3.3 *** A0A2G2YKN9_CAPAN)
Solyc06g072840.3.1	-2.23252	2.53061e-08	2.60192e-06	hypothetical protein (AHRD V3.3 *** AT3G03150.1)
Solyc03g045140.4.1	-2.22704	0.00357325	0.0335234	Cyclopropane-fatty-acyl-phospholipid synthase (AHRD V3.3 *** A0A2U1PIS2_ARTAN)
Solyc01g058660.1.1	-2.21183	0.00454925	0.0399035	Unknown protein
Solyc06g005020.3.1	-2.21054	0.00049821	0.00771885	ATP synthase subunit d, mitochondrial (AHRD V3.3 *** A0A1U8FCW0_CAPAN)
Solyc03g093060.1.1	-2.20837	8.20819e-05	0.00192697	Bifunctional inhibitor/lipid-transfer protein/seed storage 2S albumin superfamily protein (AHRD V3.3 *** A0A2U1PU47_ARTAN)
Solyc12g098250.1.1	-2.19828	3.19317e-08	3.19264e-06	acanthoscurrin-1-like (AHRD V3.3 *-* XP_010314853.1)
Solyc12g098260.1.1	-2.19468	7.076e-08	6.35749e-06	acanthoscurrin-1-like (AHRD V3.3 *-* XP_010314853.1)
Solyc01g107370.3.1	-2.19031	2.28321e-06	0.000110578	Gibberellin-regulated protein (AHRD V3.3 *** K0E174_POPTO)
Solyc09g075410.4.1	-2.17413	3.17214e-11	1.21981e-08	Pollen Ole e 1 allergen/extensin (AHRD V3.3 *** A0A2U1KBI3_ARTAN)
Solyc07g008600.1.1	-2.16947	0.000104776	0.00233434	receptor-like protein 12 (AHRD V3.3 *** A0A1U8F5D2_CAPAN)
Solyc12g098300.1.1	-2.15458	2.23022e-07	1.71176e-05	Unknown protein
Solyc09g091600.4.1	-2.12497	4.33747e-07	2.88569e-05	Protein SULFUR DEFICIENCY-INDUCED 1 (AHRD V3.3 *** A0A2G2ZTV9_CAPAN)
Solyc05g013470.4.1	-2.12274	0.000338526	0.00572961	Protein DETOXIFICATION (AHRD V3.3 *** A0A2I4EHX0_9ROSI)
Solyc03g032243.1.1	-2.11845	2.57819e-09	3.87272e-07	IQ domain-containing protein (AHRD V3.3 *-* A0A1Q3B9N0_CEPFO)
Solyc12g017400.3.1	-2.11594	0.00633236	0.0499394	NAC domain-containing protein (AHRD V3.3 *-* A0A2K3MP41_TRIPR)
Solyc12g007270.3.1	-2.11366	3.87936e-11	1.4346e-08	Xyloglucan endotransglucosylase/hydrolase (AHRD V3.3 *** A0A2G2X3I0_CAPBA)
Solyc08g067500.1.1	-2.10583	5.59678e-11	1.99277e-08	Non-specific lipid-transfer protein (AHRD V3.3 *** K4CLX6_SOLLC)
Solyc02g014300.2.1	-2.10132	9.1702e-11	3.02921e-08	Pectinesterase (AHRD V3.3 *** A0A2G2VTJ6_CAPBA)
Solyc09g150105.1.1	-2.08554	0.000301643	0.00530121	Laccase (AHRD V3.3 *** M1AHJ4_SOLTU)
Solyc08g014360.2.1	-2.06291	0.000477507	0.00747032	Alcohol dehydrogenase (AHRD V3.3 *** A0A1Y1I027_KLENI)
Solyc06g082960.3.1	-2.06217	0.00131882	0.0160894	Maternal effect embryo arrest protein (AHRD V3.3 *** Q94K16_ARATH)
Solyc12g007260.2.1	-2.0536	2.14417e-10	5.4968e-08	Xyloglucan endotransglucosylase/hydrolase (AHRD V3.3 *** A0A2G2YUJ1_CAPAN)
Solyc03g120050.3.1	-2.04087	0.000101174	0.00226986	Unknown protein
Solyc12g019120.2.1	-2.03932	2.46269e-07	1.84242e-05	Pectin lyase-like superfamily protein (AHRD V3.3 *** O80559_ARATH)
Solyc05g052265.1.1	-2.02873	1.59627e-05	0.000520194	Unknown protein
Solyc12g098240.1.1	-2.02238	3.55933e-07	2.45288e-05	acanthoscurrin-1-like (AHRD V3.3 *-* XP_010314853.1)
Solyc01g067870.3.1	-2.01971	3.20476e-08	3.19264e-06	Peroxidase (AHRD V3.3 *** K4AX35_SOLLC)
Solyc04g014510.3.1	-2.00315	6.12756e-34	1.17815e-29	glutamine synthase
Solyc10g079100.1.1	-2.00222	2.27259e-05	0.00068595	Unknown protein
Solyc02g082090.3.1	-2.00051	6.91937e-12	3.32597e-09	Peroxidase (AHRD V3.3 *** K4BA79_SOLLC)
Solyc01g111900.4.1	-1.99505	4.31887e-05	0.00116792	O-methyltransferase (AHRD V3.3 *** A0A2S1PVB6_CAMAC)
Solyc12g049070.1.1	-1.99258	7.81001e-07	4.64901e-05	extensin-like
Solyc12g094530.1.1	-1.99228	0.00188348	0.0210912	DUF241 domain protein%2C putative (DUF241) (AHRD V3.3 *** AT1G76210.1)
Solyc05g009580.3.1	-1.98957	8.85288e-07	5.14243e-05	Aluminum-activated malate transporter 9 (AHRD V3.3 *** A0A2G3B6A6_CAPCH)
Solyc01g097680.2.1	-1.98889	1.34487e-06	7.29383e-05	Extensin-like protein Dif10 (AHRD V3.3 *-* Q43504_SOLLC)
Solyc12g017870.2.1	-1.98886	2.45185e-12	1.38652e-09	Peroxidase (AHRD V3.3 *** K4DDB5_SOLLC)
Solyc07g049240.3.1	-1.98404	3.46541e-13	3.02861e-10	Peroxidase (AHRD V3.3 *** K4CF27_SOLLC)
Solyc10g045773.1.1	-1.97176	0.00191747	0.0213847	Unknown protein
Solyc04g008000.3.1	-1.96577	6.16588e-05	0.00153963	Calcium-dependent protein kinase (AHRD V3.3 *-* CDPK_DAUCA)
Solyc06g051040.4.1	-1.96342	1.20894e-08	1.41733e-06	Mitotic checkpoint serine/threonine-protein kinase BUB1-like protein (AHRD V3.3 *-* A0A2K3L1J0_TRIPR)
Solyc01g108710.3.1	-1.95962	0.0054866	0.045392	Unknown protein
Solyc06g007180.3.1	-1.94	1.27097e-17	3.55e-14	asparagine synthetase 1
Solyc12g007250.1.1	-1.92953	1.12055e-09	1.9949e-07	Xyloglucan endotransglucosylase/hydrolase (AHRD V3.3 *** A0A2G2YUJ1_CAPAN)
Solyc07g053840.1.1	-1.92409	0.000118765	0.00256284	Leucine-rich repeat-containing protein (AHRD V3.3 *** A0A2U1P4T2_ARTAN)
Solyc03g005580.2.1	-1.91734	0.00435483	0.0385676	Seed storage protein (AHRD V3.3 *** Q2TPW5_9ROSI)
Solyc01g100000.3.1	-1.91697	2.07317e-06	0.000102207	F-box domain, Phloem protein 2-like protein (AHRD V3.3 *** A0A2U1MNC1_ARTAN)
Solyc03g096780.1.1	-1.91136	4.44085e-06	0.000191444	Protein RESPONSE TO LOW SULFUR 2 (AHRD V3.3 *-* LSU2_ARATH)
Solyc02g083285.2.1	-1.91062	1.05138e-08	1.25558e-06	Protein IQ-DOMAIN 31 (AHRD V3.3 *-* A0A1J3ETM1_NOCCA)
Solyc01g006660.3.1	-1.90742	0.00601338	0.048279	Subtilisin-like protease (AHRD V3.3 *** A0A2I0XJ46_9ASPA)
Solyc02g079520.3.1	-1.90087	3.64666e-05	0.00102207	Calcium-binding protein PBP1 (AHRD V3.3 *** A0A1U8G283_CAPAN)
Solyc06g054070.3.1	-1.89998	1.31473e-11	5.87869e-09	Non-specific lipid-transfer protein-like protein (AHRD V3.3 *** A0A1J6I240_NICAT)
Solyc08g074680.3.1	-1.89801	3.38142e-07	2.3471e-05	partialpolyphenol oxidase A
Solyc12g088860.2.1	-1.89717	0.000180561	0.00354249	EF-hand domain (AHRD V3.3 *** A0A200QZ93_9MAGN)
Solyc03g031530.4.1	-1.89162	1.94232e-10	5.1868e-08	Sulfite exporter TauE/SafE family protein 2 (AHRD V3.3 *** TAUE2_ARATH)
Solyc02g077030.3.1	-1.8851	4.10676e-07	2.75125e-05	Phospholipase A1-II 1 (AHRD V3.3 *** A0A2G2VBM1_CAPBA)
Solyc01g096405.1.1	-1.88183	0.00216739	0.0234776	Unknown protein
Solyc03g083870.4.1	-1.86455	1.02911e-11	4.71112e-09	Pectinesterase (AHRD V3.3 *** A0A200QC54_9MAGN)
Solyc04g081130.1.1	-1.8495	0.000465135	0.00729458	Glyoxal oxidase (AHRD V3.3 *** A0A200QQ43_9MAGN)
Solyc10g085500.2.1	-1.84404	0.000823221	0.0112097	Cytochrome P450 (AHRD V3.3 *** A0A2U1LHU2_ARTAN)
Solyc09g010960.3.1	-1.84289	0.00229201	0.0244553	WRKY transcription factor 49
Solyc09g025230.4.1	-1.84289	3.22004e-07	2.25133e-05	patellin-4-like (AHRD V3.3 *** A0A2I4F6C8_9ROSI)
Solyc12g100080.1.1	-1.84123	7.87281e-07	4.67193e-05	Extensin-like protein Ext1 (AHRD V3.3 *** Q8VWM5_SOLLC)
Solyc04g006950.4.1	-1.83758	0.000592827	0.00881538	Unknown protein
Solyc02g063410.3.1	-1.83493	0.00323943	0.0314093	Hydroxyproline-rich glycoprotein family protein (AHRD V3.3 *** A0A2U1M3E1_ARTAN)
Solyc12g049170.2.1	-1.83254	1.6809e-07	1.33548e-05	Extensin-like protein Ext1 (AHRD V3.3 *** Q8VWM5_SOLLC)
Solyc06g051220.1.1	-1.83201	0.00118811	0.0149351	hypothetical protein (AHRD V3.3 *** AT2G31930.1)
Solyc06g083000.1.1	-1.82839	1.22922e-05	0.000419047	Calmodulin-like protein 5 (AHRD V3.3 *** A0A2G2WMY5_CAPBA)
Solyc02g093660.1.1	-1.8277	3.91805e-09	5.53914e-07	Unknown protein
Solyc04g056620.2.1	-1.81383	0.000112125	0.00246945	Auxin Efflux Facilitator 10
Solyc03g096770.1.1	-1.80052	3.45966e-07	2.39276e-05	Protein RESPONSE TO LOW SULFUR 2 (AHRD V3.3 *-* LSU2_ARATH)
Solyc05g054060.3.1	-1.80045	0.000158957	0.00321713	UTP--glucose-1-phosphate uridylyltransferase (AHRD V3.3 *** A0A2G2ZK77_CAPAN)
Solyc03g114900.3.1	-1.7995	1.28116e-06	7.01789e-05	COBRA-like protein (AHRD V3.3 *** K4BKZ2_SOLLC)
Solyc05g055320.3.1	-1.79534	1.03102e-10	3.19732e-08	Peroxidase (AHRD V3.3 *** K4C2K8_SOLLC)
Solyc12g049160.1.1	-1.79317	0.000381003	0.00623981	Extensin-like protein Ext1 (AHRD V3.3 *** Q8VWM5_SOLLC)
Solyc02g085110.4.1	-1.7919	9.08876e-07	5.26072e-05	Laccase (AHRD V3.3 *** K4BB25_SOLLC)
Solyc06g075170.1.1	-1.784	0.0034327	0.0326898	Senescence regulator S40 (AHRD V3.3 *** A0A200QID2_9MAGN)
Solyc08g007600.2.1	-1.78112	1.7776e-06	9.04179e-05	Subtilisin-like protease (AHRD V3.3 *** Q9LWA3_SOLLC)
Solyc01g009400.3.1	-1.77905	4.63616e-06	0.000196776	Peroxidase (AHRD V3.3 *** K4ATD6_SOLLC)
Solyc12g088000.2.1	-1.7783	3.11979e-06	0.000143775	Tyrosine aminotransferase (AHRD V3.3 *** A0A2G2VLJ4_CAPBA)
Solyc03g033750.2.1	-1.77782	3.58068e-07	2.45877e-05	AAA-ATPase At3g50940-like (AHRD V3.3 *-* A0A2I4EX93_9ROSI)
Solyc01g091670.3.1	-1.77711	1.79036e-10	4.84833e-08	3-oxo-Delta(4,5)-steroid 5-beta-reductase (AHRD V3.3 *** A0A2G3DDY0_CAPCH)
Solyc01g102610.3.1	-1.77704	0.00600048	0.0482321	Ferric reduction oxidase 6 (AHRD V3.3 *** A0A2G3BUN6_CAPCH)
Solyc05g018050.1.1	-1.77317	5.44019e-06	0.000220672	RING/U-box superfamily protein (AHRD V3.3 *-* A0A2U1KYA3_ARTAN)
Solyc06g082450.1.1	-1.76752	2.03997e-09	3.18883e-07	ovate family protein
Solyc02g090430.3.1	-1.76112	5.35553e-05	0.00137478	MAP kinase kinase kinase 20
Solyc01g079180.4.1	-1.76044	0.00520043	0.0436632	Pectinesterase (AHRD V3.3 *** A0A2G2XQP7_CAPBA)
Solyc02g087975.1.1	-1.75984	0.000400203	0.00647158	Unknown protein
Solyc09g011430.1.1	-1.75723	4.09383e-05	0.00112125	transmembrane protein (AHRD V3.3 *** AT3G09280.1)
Solyc09g090600.3.1	-1.75365	1.07931e-19	6.91728e-16	acid phosphatase 1-like (AHRD V3.3 *** A0A1U7W5M1_NICSY)
Solyc02g085910.4.1	-1.75266	0.00381274	0.0352102	LOB domain-containing protein (AHRD V3.3 *** A0A2U1NKN8_ARTAN)
Solyc02g032860.3.1	-1.75136	0.000988951	0.01299	5'-adenylylsulfate reductase 1, chloroplastic (AHRD V3.3 *** A0A2G3D220_CAPCH)
Solyc05g005040.4.1	-1.74309	0.000733825	0.0103213	Pectin lyase-like superfamily protein (AHRD V3.3 *** Q38958_ARATH)
Solyc05g150109.1.1	-1.74065	0.00453588	0.0398225	Unknown protein
Solyc04g076770.3.1	-1.73812	1.71735e-06	8.82872e-05	Peroxidase (AHRD V3.3 *** K4BUB5_SOLLC)
Solyc06g075450.2.1	-1.72278	0.000255233	0.00464274	Protein NRT1/ PTR FAMILY 2.7 (AHRD V3.3 *** A0A2G3CB24_CAPCH)
Solyc08g076790.3.1	-1.72202	0.000142156	0.00295166	NAD(P)-binding Rossmann-fold superfamily protein (AHRD V3.3 *** A0A2U1LGD5_ARTAN)
Solyc05g010460.4.1	-1.72123	1.0336e-05	0.000369386	hypothetical protein (DUF1262) (AHRD V3.3 *** AT1G13490.2)
Solyc12g044710.1.1	-1.72041	3.7141e-05	0.00103644	hydroxyproline-rich glycoprotein family protein (AHRD V3.3 *** AT5G09530.1)
Solyc10g005190.1.1	-1.71949	1.73356e-08	1.8754e-06	Root hair specific 4 (AHRD V3.3 *** Q9SY31_ARATH)
Solyc04g008470.3.1	-1.71808	3.56809e-06	0.000159173	Defensin SD2 (AHRD V3.3 *** A0A2G2ZH52_CAPAN),Pfam:PF00304
Solyc02g030220.1.1	-1.71701	0.00203863	0.0223726	Extensin-like protein Dif10 (AHRD V3.3 *-* Q43504_SOLLC)
Solyc12g100220.2.1	-1.71089	3.13177e-10	7.25476e-08	NAD(P)-binding Rossmann-fold superfamily protein (AHRD V3.3 *** Q94AL3_ARATH)
Solyc07g043710.4.1	-1.7092	0.00535034	0.044582	HXXXD-type acyl-transferase family protein (AHRD V3.3 *** F4JBC7_ARATH)
Solyc06g072350.3.1	-1.70866	0.000353119	0.00590898	CASP-like protein (AHRD V3.3 *** A0A2G3CXI9_CAPCH)
Solyc05g008670.3.1	-1.69984	0.000528338	0.0080462	Zinc finger transcription factor 36
Solyc08g042010.4.1	-1.69863	0.00248181	0.0258096	Exostosin-like (AHRD V3.3 *** A0A200R599_9MAGN)
Solyc05g055540.3.1	-1.69619	0.00258293	0.0266856	Major facilitator superfamily (AHRD V3.3 *** A0A2U1MQP6_ARTAN)
Solyc10g082040.2.1	-1.6941	0.000177887	0.00349716	HVA22-like protein (AHRD V3.3 *** A0A1U8ENC8_CAPAN)
Solyc11g006290.2.1	-1.68931	6.85829e-05	0.00166706	3-oxo-5-alpha-steroid 4-dehydrogenase (AHRD V3.3 *** A0A200PYH0_9MAGN)
Solyc08g082950.4.1	-1.68756	1.34102e-08	1.54394e-06	Aluminum activated malate transporter family protein (AHRD V3.3 *** A0A2U1LM75_ARTAN)
Solyc08g014580.4.1	-1.68397	0.000143996	0.00297787	type I inositol polyphosphate 5-phosphatase 12-like (AHRD V3.3 *** A0A2I4G632_9ROSI)
Solyc01g107710.2.1	-1.68395	0.000103667	0.00231498	Late embryogenesis abundant protein-related / LEA protein-like protein (AHRD V3.3 *-* A0A178VGJ3_ARATH)
Solyc01g080410.3.1	-1.67901	1.39294e-06	7.48102e-05	Peptide-methionine (R)-S-oxide reductase (AHRD V3.3 *** A0A1U8FLP0_CAPAN)
Solyc02g080640.4.1	-1.67719	6.35758e-07	3.93046e-05	adenylyl-sulfate reductase
Solyc12g088330.1.1	-1.67455	2.40791e-06	0.000115742	ZCF37 (AHRD V3.3 *** A0A2U1NT51_ARTAN)
Solyc08g007780.3.1	-1.66767	3.76991e-07	2.55974e-05	Expansin (AHRD V3.3 *** K4CIR5_SOLLC)
Solyc02g014220.3.1	-1.66252	7.99421e-10	1.474e-07	Endoglucanase (AHRD V3.3 *** A0A2G3D2B5_CAPCH)
Solyc12g100090.1.1	-1.66233	4.14876e-06	0.000179658	Extensin-like protein Ext1 (AHRD V3.3 *** Q8VWM5_SOLLC)
Solyc08g061010.4.1	-1.64538	0.000486528	0.00757698	Major facilitator superfamily protein (AHRD V3.3 *** A0A1P8AZ62_ARATH)
Solyc04g081140.1.1	-1.64306	2.14065e-05	0.000656599	Glyoxal oxidase-related protein (AHRD V3.3 *** A0A2U1MRW9_ARTAN)
Solyc06g009610.1.1	-1.64159	2.04614e-07	1.59276e-05	Transcription factor GRAS (AHRD V3.3 *** A0A200PWC4_9MAGN)
Solyc08g066590.3.1	-1.6369	4.61916e-05	0.001225	Late embryogenesis abundant protein-related / LEA protein-like protein (AHRD V3.3 *-* A0A178VGJ3_ARATH)
Solyc12g005787.1.1	-1.63347	5.08126e-13	3.48919e-10	Peroxidase (AHRD V3.3 *** K4CMV0_SOLLC)
Solyc12g100110.1.1	-1.62901	1.97044e-07	1.54007e-05	Extensin-like protein Ext1 (AHRD V3.3 *** Q8VWM5_SOLLC)
Solyc12g049190.3.1	-1.629	1.18796e-10	3.56889e-08	Hcr2-0B (AHRD V3.3 *** Q9ZTJ9_SOLLC)
Solyc06g035980.4.1	-1.62892	8.781e-09	1.07536e-06	Unknown protein
Solyc01g109860.3.1	-1.62686	4.93762e-10	1.06669e-07	Sec14p-like phosphatidylinositol transfer family protein (AHRD V3.3 *** A0A2U1QM07_ARTAN)
Solyc07g065420.1.1	-1.61998	9.34207e-11	3.02921e-08	Protein MIZU-KUSSEI 1 (AHRD V3.3 *** A0A1U8GTQ9_CAPAN)
Solyc08g076640.1.1	-1.61878	7.046e-07	4.26017e-05	Eukaryotic aspartyl protease family protein (AHRD V3.3 *** A0A2U1KXX4_ARTAN)
Solyc06g059990.4.1	-1.61073	1.20552e-05	0.000414874	Alkyl transferase (AHRD V3.3 *** K7W9N9_SOLLC)
Solyc05g013460.4.1	-1.60613	3.44507e-08	3.36235e-06	Protein DETOXIFICATION (AHRD V3.3 *** A0A1Q3CW99_CEPFO)
Solyc12g100100.1.1	-1.60299	1.41823e-05	0.000470954	Extensin-like protein Ext1 (AHRD V3.3 *** Q8VWM5_SOLLC)
Solyc09g059470.4.1	-1.59702	2.12902e-10	5.4968e-08	hypothetical protein (AHRD V3.3 *** AT3G07210.1)
Solyc11g039570.3.1	-1.59505	4.62909e-08	4.34164e-06	Peroxidase (AHRD V3.3 *** K4D7T6_SOLLC)
Solyc10g083300.2.1	-1.58756	1.37968e-06	7.43057e-05	invertase 8
Solyc02g093070.3.1	-1.58596	0.000869661	0.0117012	2-oxoglutarate (2OG) and Fe(II)-dependent oxygenase superfamily protein (AHRD V3.3 *** A0A2U1Q3D7_ARTAN)
Solyc05g005540.4.1	-1.58259	1.10056e-07	9.1708e-06	Polygalacturonase-1 non-catalytic subunit beta (AHRD V3.3 *** GP1_SOLLC)
Solyc10g076830.2.1	-1.57522	0.000310314	0.00538972	Laccase (AHRD V3.3 *** K4D225_SOLLC)
Solyc09g011090.3.1	-1.5717	7.44007e-05	0.00177129	Glycosyltransferase (AHRD V3.3 *** O80941_ARATH)
Solyc10g052600.1.1	-1.56638	4.1652e-07	2.7807e-05	S-adenosyl-L-methionine-dependent methyltransferases superfamily protein (AHRD V3.3 *-* Q9M144_ARATH)
Solyc05g024340.1.1	-1.56505	0.00221194	0.0238257	Exocyst subunit Exo70 family protein (AHRD V3.3 *** A0A2G2VNR9_CAPBA)
Solyc12g006000.1.1	-1.56025	8.98448e-05	0.00206139	Clathrin coat assembly protein (AHRD V3.3 *** A0A1U8E4Q4_CAPAN)
Solyc03g006710.1.1	-1.54945	0.00277134	0.0280888	Calcium-binding protein PBP1 (AHRD V3.3 *** A0A1U8F7L1_CAPAN)
Solyc05g052540.2.1	-1.54869	0.00164143	0.0190005	Protein trichome birefringence-like 28 (AHRD V3.3 *** A0A1J3JX20_NOCCA)
Solyc07g052530.3.1	-1.5486	5.86285e-14	6.63088e-11	Peroxidase (AHRD V3.3 *** K4CFF2_SOLLC)
Solyc03g031620.3.1	-1.54304	1.22854e-07	9.96669e-06	5'-adenylylsulfate reductase 1, chloroplastic (AHRD V3.3 *** S5ZQS8_NICAT)
Solyc04g078520.3.1	-1.54015	0.00385501	0.0355322	Transcription factor MYC/MYB domain-containing protein (AHRD V3.3 *** A0A2U1MUV3_ARTAN)
Solyc05g015495.1.1	-1.53655	0.000866016	0.0116603	Glucuronoxylan 4-O-methyltransferase 1 (AHRD V3.3 *** A0A2G2VDV8_CAPBA)
Solyc02g062890.3.1	-1.52789	0.000533948	0.00810278	polyol monosaccharide transporter 5
Solyc10g076660.2.1	-1.52435	1.6942e-05	0.00054655	2-oxoglutarate (2OG) and Fe(II)-dependent oxygenase superfamily protein (AHRD V3.3 *** F4J670_ARATH)
Solyc06g084330.3.1	-1.50447	0.00234901	0.0248566	ERD (Early-responsive to dehydration stress) family protein (AHRD V3.3 *** A0A1P8B4I8_ARATH)
Solyc04g014550.3.1	-1.50101	0.00187532	0.0210244	TPX2 (Targeting protein for Xklp2) protein family (AHRD V3.3 *** F4K773_ARATH)
Solyc10g079690.2.1	-1.49878	0.00294243	0.0292221	Unknown protein
Solyc11g069250.2.1	-1.48967	2.49215e-05	0.000740778	Fasciclin-like arabinogalactan protein 12 (AHRD V3.3 *** A0A1J6K653_NICAT)
Solyc09g008590.4.1	-1.48577	5.06846e-09	6.76745e-07	pistil-specific extensin-like protein (AHRD V3.3 *** A0A2I4E0V8_9ROSI),Pfam:PF01190
Solyc01g098570.2.1	-1.47962	0.00128567	0.0157851	FANTASTIC four-like protein (DUF3049) (AHRD V3.3 *-* F4HX10_ARATH)
Solyc05g015815.1.1	-1.46936	0.000359082	0.00597754	Unknown protein
Solyc06g075570.2.1	-1.46793	9.3786e-06	0.000343621	Respiratory burst oxidase (AHRD V3.3 *** A0A2U1P7U6_ARTAN)
Solyc06g009280.1.1	-1.46573	1.26764e-06	6.96369e-05	ABC transporter B family member (AHRD V3.3 *** A0A2K3NLX3_TRIPR)
Solyc03g118930.2.1	-1.461	3.2575e-06	0.000147094	Glycosyltransferase (AHRD V3.3 *** Q9LV22_ARATH)
Solyc10g007600.3.1	-1.45809	5.835e-06	0.000233242	glycolate oxidase
Solyc02g079980.3.1	-1.45566	0.000559632	0.00841943	Sulfite exporter TauE/SafE family protein 2 (AHRD V3.3 *** TAUE2_ARATH)
Solyc01g094380.2.1	-1.45497	4.97085e-05	0.00129228	O-glucosyltransferase rumi-like protein (AHRD V3.3 *** A0A1J3GP63_NOCCA)
Solyc04g071580.3.1	-1.44806	1.11017e-07	9.20055e-06	Abscicic acid stress ripening 2
Solyc06g069550.1.1	-1.44619	3.21753e-06	0.000145904	UDP-glucose 6-dehydrogenase (AHRD V3.3 *** A0A1U8F9G7_CAPAN)
Solyc09g065570.4.1	-1.44095	0.000505792	0.00781364	Serine/threonine-protein kinase Nek2 (AHRD V3.3 *** A0A1U8G1X8_CAPAN)
Solyc03g080060.1.1	-1.43952	0.0052416	0.0439321	L-type lectin-domain containing receptor kinase VIII.2-like (AHRD V3.3 *** A0A2I4F917_9ROSI)
Solyc02g072490.3.1	-1.43921	0.00284433	0.0285427	O-fucosyltransferase (AHRD V3.3 *** A0A2P5EP10_TREOI)
Solyc12g005783.1.1	-1.43403	1.15887e-09	2.04419e-07	Peroxidase (AHRD V3.3 *** K4CMV0_SOLLC)
Solyc10g055197.1.1	-1.43051	5.92486e-10	1.18664e-07	Dirigent protein (AHRD V3.3 *** M1BZH9_SOLTU)
Solyc06g008240.3.1	-1.43045	0.00163682	0.0189853	CRIB domain-containing protein RIC6 (AHRD V3.3 *** A0A2G2Z6W9_CAPAN)
Solyc12g098780.2.1	-1.42215	0.00590262	0.0476647	extensin-2-like (AHRD V3.3 *-* A0A1U8ESB3_CAPAN)
Solyc08g068390.3.1	-1.42156	0.00029309	0.00520592	Glyoxysomal fatty acid beta-oxidation multifunctional protein MFP-a (AHRD V3.3 *** A0A2G2YXE3_CAPAN)
Solyc01g010180.3.1	-1.41438	1.55485e-08	1.73809e-06	Unknown protein
Solyc01g107140.3.1	-1.41323	0.000456062	0.00719926	Transcription factor (AHRD V3.3 *** A0A2G2V728_CAPBA)
Solyc03g093380.2.1	-1.41287	2.32607e-05	0.000696626	Protein kinase family protein (AHRD V3.3 *** A0A1P8AW67_ARATH)
Solyc09g066300.3.1	-1.40064	0.00207449	0.0226884	RING/U-box superfamily protein (AHRD V3.3 *** A0A2U1Q188_ARTAN)
Solyc05g041140.4.1	-1.39814	1.68016e-06	8.68398e-05	Bifunctional inhibitor/plant lipid transfer protein/seed storage helical domain-containing protein (AHRD V3.3 *** A0A103YIU0_CYNCS)
Solyc11g066390.2.1	-1.39171	2.08748e-23	2.0068e-19	superoxide dismutase 3
Solyc12g044630.2.1	-1.39068	0.00554447	0.0457525	Profilin (AHRD V3.3 *** A0A1U8F126_CAPAN)
Solyc09g082550.3.1	-1.39022	9.98355e-05	0.00224507	Sulfate transporter (AHRD V3.3 *** Q70BL1_BRAOL)
Solyc03g115710.1.1	-1.38932	9.60126e-06	0.000347652	Receptor-like protein kinase THESEUS 1 (AHRD V3.3 *** A0A1U8G3K7_CAPAN)
Solyc03g083710.1.1	-1.38912	0.000220112	0.00416136	Plant invertase/pectin methylesterase inhibitor superfamily protein (AHRD V3.3 *** A0A2U1LKC0_ARTAN)
Solyc03g121300.2.1	-1.38863	8.44225e-09	1.04733e-06	jacalin-related lectin 19 (AHRD V3.3 *** A0A2G2XW42_CAPAN)
Solyc03g033360.3.1	-1.38419	0.00199271	0.0219816	Eukaryotic aspartyl protease family protein (AHRD V3.3 *** A0A2U1KXY4_ARTAN)
Solyc03g032040.3.1	-1.38368	1.55253e-10	4.38977e-08	Tonoplast monosaccharide transporter 1
Solyc05g005870.3.1	-1.37996	2.13652e-05	0.000656599	WAT1-related protein (AHRD V3.3 *** K4BWB4_SOLLC)
Solyc03g119320.1.1	-1.37926	2.27756e-11	9.51969e-09	hypothetical protein (AHRD V3.3 *** AT1G48780.1)
Solyc04g050623.1.1	-1.37844	0.00605565	0.0485055	Unknown protein
Solyc02g062690.3.1	-1.37824	0.000474001	0.00742152	bHLH transcription factor 012
Solyc09g075930.2.1	-1.37809	0.00348067	0.0329816	Amine oxidase (AHRD V3.3 *** A0A1U8GHQ9_CAPAN)
Solyc10g085010.3.1	-1.37588	3.99338e-13	3.06719e-10	PAR1-like protein (AHRD V3.3 *** A0A2U1KIG3_ARTAN)
Solyc01g079370.4.1	-1.3729	4.91922e-09	6.61411e-07	Transcription factor GRAS (AHRD V3.3 *** A0A200PWC4_9MAGN)
Solyc01g009410.3.1	-1.37109	7.39199e-06	0.000283119	Peroxidase (AHRD V3.3 *** K4ATD7_SOLLC)
Solyc03g098060.3.1	-1.36977	0.00331375	0.0318704	zinc-finger homeodomain protein 11-like (AHRD V3.3 *** A0A2I4EVI3_9ROSI)
Solyc02g087970.1.1	-1.36963	0.000253611	0.00462636	Mini zinc finger protein (AHRD V3.3 *** A0ZXL1_SOLLC)
Solyc10g084320.3.1	-1.36909	0.00340704	0.0324947	Subtilisin-like protease (AHRD V3.3 *** O82777_SOLLC)
Solyc01g009505.1.1	-1.36711	7.84955e-06	0.000296341	Unknown protein
Solyc07g042520.4.1	-1.36707	1.49934e-08	1.69324e-06	Sucrose synthase (AHRD V3.3 *** K4CEB3_SOLLC)
Solyc01g079920.3.1	-1.36447	7.34477e-08	6.56827e-06	Eukaryotic aspartyl protease family protein (AHRD V3.3 *** A0A2U1M5P2_ARTAN)
Solyc01g068550.2.1	-1.36118	0.00056282	0.00846078	O-methyltransferase (AHRD V3.3 *** A0A1B4Z3W3_9ROSA)
Solyc11g040140.2.1	-1.36009	0.0002756	0.00493386	Xyloglucan endotransglucosylase/hydrolase (AHRD V3.3 *** A0A2G3CEF2_CAPCH)
Solyc09g007650.3.1	-1.35971	0.00484741	0.0416857	Fasciclin-like arabinogalactan protein 11 (AHRD V3.3 *** A0A2G3BJB7_CAPCH)
Solyc03g096460.4.1	-1.35673	4.98972e-07	3.25211e-05	wound/stress protein AY568721
Solyc09g005630.3.1	-1.35573	3.47772e-09	4.95305e-07	Protein trichome birefringence-like 3 (AHRD V3.3 *** A0A1U8EDH5_CAPAN)
Solyc01g106640.2.1	-1.35171	2.49276e-05	0.000740778	Pathogenesis-related protein 1 (AHRD V3.3 *** E2GEU2_9ROSI)
Solyc04g050170.4.1	-1.35055	1.73621e-08	1.8754e-06	Leucine-rich receptor-like protein kinase family protein (AHRD V3.3 *** A0A061F8K0_THECC)
Solyc02g082150.1.1	-1.35046	4.29962e-05	0.00116435	BnaCnng18720D protein (AHRD V3.3 *** A0A078IGP5_BRANA)
Solyc05g009320.4.1	-1.34276	4.6701e-09	6.41372e-07	LOB domain-containing protein 40 (AHRD V3.3 *** A0A2G2VK71_CAPBA)
Solyc01g009370.2.1	-1.34167	5.72618e-09	7.5409e-07	Cytochrome P450 (AHRD V3.3 *** A0A2U1MC34_ARTAN)
Solyc08g080930.1.1	-1.34079	3.02726e-05	0.000867438	Xyloglucan galactosyltransferase KATAMARI1 (AHRD V3.3 *** A0A1J3J5G4_NOCCA)
Solyc05g009570.3.1	-1.33876	0.00539031	0.0448462	30S ribosomal protein 3, chloroplastic (AHRD V3.3 *** A0A2G2VK36_CAPBA)
Solyc06g066560.3.1	-1.33831	0.00245235	0.025618	tonoplast intrinsic protein 2.5
Solyc03g121170.3.1	-1.33482	0.00268515	0.0274614	GDSL esterase/lipase (AHRD V3.3 *** A0A2G3D0R1_CAPCH)
Solyc03g118710.3.1	-1.33314	4.04093e-11	1.46594e-08	Calcium-dependent lipid-binding (CaLB domain) family protein (AHRD V3.3 *** A0A2U1LMA8_ARTAN)
Solyc01g104820.4.1	-1.33164	1.83143e-05	0.00057916	Vacuolar iron transporter-like protein (AHRD V3.3 *** A0A2K3NGY4_TRIPR)
Solyc07g065880.4.1	-1.33127	7.04276e-06	0.00027191	Kinesin KP1 (AHRD V3.3 *** A0A2G2WFS9_CAPBA)
Solyc03g083500.3.1	-1.3277	0.00430495	0.0383632	DUF1442 domain-containing protein (AHRD V3.3 *** A0A1Q3BAQ3_CEPFO)
Solyc06g067910.3.1	-1.32736	6.64024e-06	0.000258969	DUF642 domain-containing protein (AHRD V3.3 *** A0A1Q3BMB3_CEPFO)
Solyc08g076630.3.1	-1.32702	0.000248572	0.0045604	Eukaryotic aspartyl protease family protein (AHRD V3.3 *** A0A2U1ML86_ARTAN)
Solyc02g081990.3.1	-1.32692	1.29245e-17	3.55e-14	Pectinesterase (AHRD V3.3 *** A0A2G2XFI1_CAPBA)
Solyc01g112230.4.1	-1.32658	2.00279e-06	9.92466e-05	Plant EC metallothionein-like protein (AHRD V3.3 *** A0A200PQZ1_9MAGN)
Solyc06g008560.2.1	-1.32636	0.000174498	0.00344463	ternary complex factor MIP1 leucine-zipper protein (Protein of unknown function%2C DUF547) (AHRD V3.3 *** AT2G39690.1)
Solyc09g065360.4.1	-1.32418	0.00100496	0.0131444	Late embryogenesis abundant protein D-34 (AHRD V3.3 *** A0A2G3BKZ9_CAPCH)
Solyc01g093990.3.1	-1.32396	0.000315636	0.0054587	Glyoxylate/hydroxypyruvate reductase HPR3 (AHRD V3.3 *** A0A2G3AGX8_CAPAN)
Solyc05g015490.4.1	-1.32241	0.00282235	0.0284354	Bifunctional inhibitor/plant lipid transfer protein/seed storage helical domain (AHRD V3.3 *** A0A200QGD6_9MAGN)
Solyc12g089360.1.1	-1.32185	5.81874e-06	0.000233077	Peroxidase (AHRD V3.3 *** K4DH07_SOLLC)
Solyc06g059880.3.1	-1.3214	5.36014e-06	0.000218346	Acetolactate synthase (AHRD V3.3 *** A0A2G3C6U7_CAPCH)
Solyc06g034410.3.1	-1.32023	0.000105865	0.00235315	DUF1442 domain-containing protein (AHRD V3.3 *** A0A1Q3BAQ3_CEPFO)
Solyc04g051680.4.1	-1.31962	2.7256e-05	0.000804993	Ras GTPase (AHRD V3.3 *** K2SFN1_MACPH)
Solyc12g042930.2.1	-1.31713	1.01163e-06	5.75461e-05	DUF642 domain-containing protein (AHRD V3.3 *** A0A1Q3BMB3_CEPFO)
Solyc07g044710.2.1	-1.31198	0.00010722	0.00237503	3-hydroxyisobutyryl-CoA hydrolase-like protein 5 (AHRD V3.3 *** A0A2G2XQ26_CAPBA)
Solyc04g071080.2.1	-1.30904	1.19485e-05	0.000413192	extensin-like, partial (AHRD V3.3 *-* XP_019067293.2)
Solyc07g064990.3.1	-1.30641	0.000865459	0.0116603	S-adenosyl-L-methionine-dependent methyltransferases superfamily protein (AHRD V3.3 *** F4JW89_ARATH)
Solyc08g065670.4.1	-1.3026	2.98001e-11	1.16932e-08	Protein phosphatase 2C family protein (AHRD V3.3 *** A0A2U1LRS6_ARTAN)
Solyc08g081810.3.1	-1.30255	0.000835097	0.0113473	Cation/H(+) antiporter 17 (AHRD V3.3 *** A0A2G2XJX1_CAPBA)
Solyc07g008420.3.1	-1.30037	1.75378e-09	2.88204e-07	Early nodulin-like protein 1 (AHRD V3.3 *** A0A1J3GM17_NOCCA)
Solyc03g093270.3.1	-1.29537	5.12252e-05	0.00132126	NAD(P)-linked oxidoreductase superfamily protein (AHRD V3.3 *** A0A2U1L511_ARTAN)
Solyc05g010800.3.1	-1.29509	0.000236439	0.00440505	3-methyladenine DNA glycosylase (AHRD V3.3 *** A0A1Y0KLG3_9PSED)
Solyc09g007660.1.1	-1.29427	1.63372e-05	0.000529998	Fasciclin-like arabinogalactan protein 11 (AHRD V3.3 *** A0A2G3BJB8_CAPCH)
Solyc01g067370.3.1	-1.29366	3.78096e-07	2.55974e-05	TSB
Solyc02g087800.3.1	-1.29123	0.000184435	0.00360746	Aldose 1-epimerase (AHRD V3.3 *** A0A1U8FRP0_CAPAN)
Solyc02g067190.4.1	-1.28943	0.000247296	0.00454565	Casparian strip membrane protein 1 (AHRD V3.3 *** CASP1_SOLTU)
Solyc08g007240.4.1	-1.28861	4.49367e-05	0.0012	Nudix hydrolase 8 (AHRD V3.3 *** A0A1U8EVF7_CAPAN)
Solyc07g052540.3.1	-1.28649	7.63042e-10	1.42437e-07	Peroxidase (AHRD V3.3 *** K4CFF3_SOLLC)
Solyc01g005630.3.1	-1.28513	0.000203788	0.00389099	Ethylene-responsive transcription factor (AHRD V3.3 *** A0A2G3BR89_CAPCH)
Solyc04g074380.4.1	-1.28159	0.000532812	0.00809192	Glycosyltransferase (AHRD V3.3 *** A0A2G3CNS7_CAPCH)
Solyc01g104810.2.1	-1.27771	1.55068e-07	1.23714e-05	Vacuolar iron transporter-like protein (AHRD V3.3 *** A0A2K3NGY4_TRIPR)
Solyc01g098960.3.1	-1.27694	3.01124e-05	0.000865426	Hexosyltransferase (AHRD V3.3 *** A0A2G3BUG9_CAPCH)
Solyc02g091800.4.1	-1.27547	4.5696e-05	0.00121521	Basic helix-loop-helix (BHLH) DNA-binding superfamily protein (AHRD V3.3 *-* A0A2U1Q8Y8_ARTAN)
Solyc11g020960.2.1	-1.27389	1.69501e-06	8.73724e-05	Proteinase inhibitor type-2 (AHRD V3.3 *** A0A2G3AT14_CAPCH)
Solyc03g112240.1.1	-1.27168	0.00415121	0.0373842	Unknown protein
Solyc08g080060.4.1	-1.27036	2.99424e-06	0.000139058	Expansin (AHRD V3.3 *** K4CP06_SOLLC)
Solyc05g054480.3.1	-1.26926	1.5796e-09	2.61818e-07	Actin (AHRD V3.3 *** A0A2G2VVS8_CAPBA)
Solyc07g005840.2.1	-1.26533	2.59149e-06	0.000123333	Cellulose synthase (AHRD V3.3 *** K4CB55_SOLLC)
Solyc07g009380.4.1	-1.26494	0.00449213	0.0395287	xyloglucan endotransglucosylase-hydrolase 2
Solyc11g072760.1.1	-1.26237	0.00268068	0.0274448	Chitinase 2 (AHRD V3.3 *** A0A2G3BA55_CAPCH)
Solyc10g084680.1.1	-1.2618	9.46732e-06	0.000344798	molybdate transporter 1-like (AHRD V3.3 *** A0A2G2Y2Q5_CAPAN)
Solyc06g074730.4.1	-1.26074	0.00213505	0.0232104	Argonaute 5
Solyc07g043200.2.1	-1.25816	9.16556e-05	0.00209544	Zinc transporter protein (AHRD V3.3 *** A5BDR3_VITVI)
Solyc07g022830.3.1	-1.25677	7.40134e-08	6.58822e-06	EXS (AHRD V3.3 *** A0A200R094_9MAGN)
Solyc06g033860.2.1	-1.25043	0.000411062	0.00661933	Glutamate dehydrogenase (AHRD V3.3 *** A0A1U8GQ51_CAPAN)
Solyc12g011023.1.1	-1.24811	7.60839e-06	0.000289104	Xyloglucan endotransglucosylase/hydrolase (AHRD V3.3 *** Q6RHX7_SOLLC)
Solyc02g080230.3.1	-1.24406	0.000268324	0.00483622	CRIB domain-containing protein RIC10 (AHRD V3.3 *** A0A1U8FUJ1_CAPAN)
Solyc12g056260.1.1	-1.24342	0.00171296	0.0196393	Xyloglucan galactosyltransferase KATAMARI1-like protein (AHRD V3.3 *** A0A2K3MVQ6_TRIPR)
Solyc12g009290.1.1	-1.24207	0.000164817	0.00331478	Auxin responsive SAUR protein (AHRD V3.3 *** A0A2U1PXP1_ARTAN)
Solyc11g069390.1.1	-1.24011	4.34055e-05	0.00117049	arabinogalactan protein 1 (AHRD V3.3 *** XP_004251131.1)
Solyc04g079510.2.1	-1.2364	0.00477656	0.0412522	Major facilitator superfamily protein (AHRD V3.3 *** A0A2U1PWN6_ARTAN)
Solyc03g071750.3.1	-1.23605	0.00357174	0.0335234	3-phosphoinositide-dependent protein kinase 1 (AHRD V3.3 *** A0A2G3CUY0_CAPCH)
Solyc12g097090.3.1	-1.23508	3.55676e-05	0.00100273	Dirigent protein (AHRD V3.3 *** K4DHI2_SOLLC)
Solyc02g084600.4.1	-1.23424	0.000904726	0.0120968	Leucine-rich repeat receptor-like protein kinase family protein (AHRD V3.3 *-* A0A061DFG6_THECC)
Solyc12g006050.2.1	-1.23208	0.00526005	0.0440675	Protein NRT1/ PTR FAMILY 6.4 (AHRD V3.3 *** A0A2G2X304_CAPBA)
Solyc11g067300.2.1	-1.22992	0.000358789	0.00597754	ABC transporter B family member (AHRD V3.3 *** A0A2K3NLX3_TRIPR)
Solyc12g009820.2.1	-1.22976	0.000676904	0.00971774	Monogalactosyldiacylglycerol synthase 3, chloroplastic (AHRD V3.3 *** A0A2G2X4B3_CAPBA)
Solyc08g082990.3.1	-1.22969	1.42961e-11	6.24709e-09	Oligopeptide transporter (AHRD V3.3 *** A0A200RD47_9MAGN)
Solyc01g080280.3.1	-1.2282	2.63079e-09	3.9211e-07	chloroplast glutamine synthetase
Solyc12g049110.1.1	-1.22814	7.95119e-05	0.0018781	Unknown protein
Solyc01g080610.3.1	-1.22656	0.00571711	0.0468555	Pentatricopeptide repeat-containing protein (AHRD V3.3 *-* A0A2G3ALG8_CAPAN)
Solyc06g009510.1.1	-1.22021	4.4671e-06	0.000191716	transcription factor UPBEAT1 (AHRD V3.3 *-* A0A2I4GEI3_9ROSI)
Solyc03g059080.3.1	-1.2201	0.000672555	0.00968096	Protein kinase superfamily protein (AHRD V3.3 *** A0A1I9LM53_ARATH)
Solyc06g064960.3.1	-1.21997	0.00275306	0.0279625	GDSL esterase/lipase 5-like (AHRD V3.3 *** A0A1U8FAQ0_CAPAN)
Solyc06g076330.3.1	-1.21694	2.39026e-07	1.80935e-05	Laccase (AHRD V3.3 *** K4C9Z3_SOLLC)
Solyc02g076890.1.1	-1.21425	6.85081e-05	0.00166706	DUF538 family protein (AHRD V3.3 *** B6T6F5_MAIZE)
Solyc02g082910.4.1	-1.21407	2.98514e-09	4.31544e-07	Acyl-CoA synthetase (AHRD V3.3 *** A0A1Y0KWS9_9PSED)
Solyc08g078460.3.1	-1.21238	3.88866e-08	3.74293e-06	Oxidoreductase family protein (AHRD V3.3 *** A0A2U1N6F1_ARTAN)
Solyc02g078660.4.1	-1.20666	1.66905e-06	8.67321e-05	Hydroxyproline-rich glycoprotein family protein (AHRD V3.3 *-* A0A1P8AWR9_ARATH)
Solyc02g092550.3.1	-1.2056	3.26478e-06	0.000147094	LOB domain-containing protein 38 (AHRD V3.3 *** A0A2G2XGY4_CAPBA)
Solyc06g075220.1.1	-1.20018	1.08474e-05	0.000383388	Fasciclin-like arabinogalactan protein 11 (AHRD V3.3 *** A0A2G2V1G2_CAPBA)
Solyc10g079810.1.1	-1.19821	3.15613e-06	0.000143798	Unknown protein
Solyc06g048790.1.1	-1.1982	0.00105271	0.013566	Protein PLANT CADMIUM RESISTANCE like (AHRD V3.3 *** A0A2R6RR66_ACTCH)
Solyc05g018310.1.1	-1.1977	0.00229341	0.0244567	RING/U-box superfamily protein (AHRD V3.3 *** A0A2U1QGT0_ARTAN)
Solyc10g084980.3.1	-1.19553	1.4369e-05	0.000475513	Copper transporter (AHRD V3.3 *-* E9LK39_VITVI)
Solyc04g058160.2.1	-1.19231	8.72944e-05	0.00202462	Calcium-dependent protein kinase (AHRD V3.3 --* CDPK_DAUCA)
Solyc04g072850.4.1	-1.18115	4.50692e-08	4.2687e-06	Beta-D-xylosidase (AHRD V3.3 *** H1AC33_SOLLC)
Solyc02g072240.3.1	-1.1784	0.000242554	0.00449719	Cellulose synthase (AHRD V3.3 *** K4B8J8_SOLLC)
Solyc06g074990.3.1	-1.1733	0.000183022	0.00358346	putative high affinity nitrate transporter 2
Solyc10g037880.3.1	-1.17271	2.75591e-08	2.8185e-06	Blue copper protein (AHRD V3.3 *** A0A2I0WGC8_9ASPA)
Solyc09g009280.1.1	-1.17082	0.000178719	0.00350994	Fructose-bisphosphate aldolase (AHRD V3.3 *-* A0A2G3BIS8_CAPCH)
Solyc07g052240.3.1	-1.17065	2.83079e-06	0.000132778	L-ascorbate oxidase-like protein (AHRD V3.3 *** A0A2G2V9R9_CAPBA)
Solyc06g005390.1.1	-1.1655	0.000200963	0.00386392	Histone H2B (AHRD V3.3 *** A0A1U8GXA4_CAPAN)
Solyc10g018320.1.1	-1.16522	0.000585838	0.00873002	Plant invertase/pectin methylesterase inhibitor superfamily protein (AHRD V3.3 *** A0A061G797_THECC)
Solyc05g051850.3.1	-1.16485	4.87003e-07	3.19577e-05	putative myo-inositol-1-phosphatase
Solyc06g084820.2.1	-1.16271	9.90401e-06	0.0003566	Cytochrome P450 (AHRD V3.3 *** A0A200PMP4_9MAGN)
Solyc01g079570.3.1	-1.16259	0.000344896	0.00581184	Beta-D-xylosidase 1 (AHRD V3.3 *** A0A1U8DZL0_CAPAN)
Solyc03g116060.4.1	-1.16142	1.98684e-05	0.000619139	Gibberellin-regulated protein 6 (AHRD V3.3 *** A0A2G3CZG9_CAPCH)
Solyc08g044510.4.1	-1.16039	6.40753e-10	1.24442e-07	Beta-glucosidase (AHRD V3.3 *** F8R893_9MAGN)
Solyc12g096400.2.1	-1.15674	4.39878e-07	2.91639e-05	Plant calmodulin-binding-like protein (AHRD V3.3 *-* G7L455_MEDTR)
Solyc05g006010.4.1	-1.15596	0.00223466	0.0239898	Protein NRT1/ PTR FAMILY 1.2 (AHRD V3.3 *-* A0A1J3FWJ0_NOCCA)
Solyc04g008730.3.1	-1.15333	1.94338e-06	9.7053e-05	Alpha-galactosidase (AHRD V3.3 *** K4BP29_SOLLC)
Solyc08g075830.4.1	-1.15203	2.01849e-09	3.1811e-07	Peroxidase (AHRD V3.3 *** K4CMV0_SOLLC)
Solyc07g008710.3.1	-1.15113	0.00105534	0.0135907	MLP-like protein 43 (AHRD V3.3 *** A0A2U1L1Z2_ARTAN)
Solyc03g070440.4.1	-1.14739	2.94679e-05	0.000854568	COBRA-like protein (AHRD V3.3 *** K4BHH3_SOLLC)
Solyc03g033460.3.1	-1.14618	3.00522e-14	3.85209e-11	Oligopeptide transporter (AHRD V3.3 *** A0A200RD47_9MAGN)
Solyc08g078550.1.1	-1.14426	0.00046183	0.00726645	Metalloendoproteinase 1-like protein (AHRD V3.3 *** A0A2K3NXA7_TRIPR)
Solyc12g049090.3.1	-1.14048	0.00367461	0.0342442	Extensin-like protein Ext1 (AHRD V3.3 *** Q8VWM5_SOLLC)
Solyc10g080430.1.1	-1.13967	0.00387152	0.0356005	C2 calcium/lipid-binding plant phosphoribosyltransferase family protein (AHRD V3.3 *** A0A061DXG0_THECC)
Solyc04g007750.4.1	-1.13732	0.000966269	0.0127775	Sn-1 protein (AHRD V3.3 *** Q42393_CAPAN)
Solyc04g079030.2.1	-1.13679	8.20238e-05	0.00192697	Glycosyltransferase (AHRD V3.3 *** V4NB36_EUTSA)
Solyc01g107190.3.1	-1.13669	0.00421773	0.0377534	LOB domain-containing protein 38 (AHRD V3.3 *** A0A2G2V731_CAPBA)
Solyc11g073030.1.1	-1.13667	0.000260815	0.00473084	Dirigent protein (AHRD V3.3 *** K4DB09_SOLLC)
Solyc06g048750.3.1	-1.13394	0.00515526	0.0434356	Unknown protein
Solyc08g079080.5.1	-1.13245	1.63858e-06	8.56113e-05	Lycopersicon esculentum invertase 9
Solyc10g008120.4.1	-1.13101	8.4976e-09	1.04733e-06	O-methyltransferase (AHRD V3.3 *** A0A1B4Z3W3_9ROSA)
Solyc08g079250.4.1	-1.12567	6.08569e-12	3.00024e-09	Bifunctional inhibitor/lipid-transfer protein/seed storage 2S albumin superfamily protein (AHRD V3.3 *** A0A2U1L4X0_ARTAN)
Solyc01g059900.4.1	-1.12493	6.21521e-05	0.00154793	Dirigent protein (AHRD V3.3 *** K4AW97_SOLLC)
Solyc02g080160.4.1	-1.12445	7.29561e-05	0.00174686	Xyloglucan endotransglucosylase/hydrolase (AHRD V3.3 *** A0A2G2VBB5_CAPBA)
Solyc03g114820.3.1	-1.1241	3.89861e-06	0.000171138	Adenine nucleotide alpha hydrolases-like superfamily protein (AHRD V3.3 *** Q9M9P7_ARATH)
Solyc12g077370.3.1	-1.12372	0.000238669	0.00443799	Non-specific serine/threonine protein kinase (AHRD V3.3 *** A0A2G2XM37_CAPBA)
Solyc10g009150.3.1	-1.12325	2.35801e-09	3.62519e-07	Organ specific protein (AHRD V3.3 *-* A0A2U1PW62_ARTAN)
Solyc06g068770.3.1	-1.11937	2.42712e-12	1.38652e-09	DB279
Solyc02g078160.3.1	-1.119	3.64918e-13	3.05055e-10	DUF506 domain-containing protein (AHRD V3.3 *** A0A1Q3CKJ0_CEPFO)
Solyc08g061920.3.1	-1.11887	8.13762e-06	0.00030381	Cytokinin oxidase/dehydrogenase (AHRD V3.3 *** C3VPM8_SOLTU)
Solyc01g097340.3.1	-1.11855	1.5203e-10	4.3628e-08	GDP-mannose-3',5'-epimerase (AHRD V3.3 *** A5JPK5_VITVI)
Solyc01g105590.2.1	-1.11841	0.00506932	0.0429752	Acylsugar acetyltransferase (AHRD V3.3 *** K4HRD2_SOLHA)
Solyc12g098840.3.1	-1.11696	0.00566509	0.0465283	ABC transporter B family member 12 (AHRD V3.3 *** A0A2G3B551_CAPCH)
Solyc02g065190.3.1	-1.10946	8.70064e-05	0.00202038	Cytochrome P450 (AHRD V3.3 *** A0A1U9X5Y9_THAGA)
Solyc08g065500.2.1	-1.10492	4.47521e-05	0.00119673	Protein phosphatase 2C family protein (AHRD V3.3 *** A0A2U1LRS6_ARTAN)
Solyc10g079230.3.1	-1.10251	0.00086447	0.0116558	UPF0481 protein At3g47200-like (AHRD V3.3 *** A0A2I4GJF8_9ROSI)
Solyc03g117610.2.1	-1.10092	0.000625693	0.0091554	Unknown protein
Solyc12g087860.3.1	-1.09952	0.000815626	0.0111616	RING/U-box superfamily protein (AHRD V3.3 *** A0A2H1ZED7_ARATH)
Solyc06g074800.1.1	-1.09951	4.45332e-05	0.00119375	Zinc finger protein (AHRD V3.3 *** A0A200R9U1_9MAGN)
Solyc06g084380.4.1	-1.09877	0.000820522	0.0111967	2-oxoglutarate (2OG) and Fe(II)-dependent oxygenase-like protein (AHRD V3.3 *** G5DX62_SILLA)
Solyc10g006430.3.1	-1.09656	0.00104346	0.0134829	transmembrane protein (AHRD V3.3 --* AT3G21710.2)
Solyc09g057580.4.1	-1.09375	1.21051e-09	2.0997e-07	DUF760 domain-containing protein (AHRD V3.3 *-* A0A1Q3CD93_CEPFO)
Solyc04g081860.3.1	-1.09359	3.83958e-06	0.00016932	Peroxidase (AHRD V3.3 *** K4BVR5_SOLLC)
Solyc10g055190.1.1	-1.09239	0.00127691	0.0156977	Dirigent protein (AHRD V3.3 *** K4D1B2_SOLLC)
Solyc04g078195.1.1	-1.09215	2.10026e-05	0.000647142	Gibberellin-regulated protein (AHRD V3.3 *** K0E174_POPTO)
Solyc05g050730.1.1	-1.09097	3.38463e-05	0.000961246	Stigma-specific Stig1 family protein (AHRD V3.3 *** A0A2U1LAF4_ARTAN)
Solyc07g065940.1.1	-1.08991	0.000698739	0.00993687	transmembrane protein (AHRD V3.3 *-* AT3G13275.1)
Solyc06g063330.3.1	-1.08916	0.00264638	0.0272127	Vacuolar ATP synthase catalytic subunit (AHRD V3.3 *** A0A0A7LU40_9ASPA)
Solyc07g043700.3.1	-1.08852	8.12034e-05	0.00191101	HXXXD-type acyl-transferase family protein (AHRD V3.3 *** F4JBC7_ARATH)
Solyc02g092870.2.1	-1.08642	2.71776e-07	1.98686e-05	Nucleolar-like protein (AHRD V3.3 *** F4J3H8_ARATH)
Solyc12g049210.1.1	-1.08575	0.000767612	0.0106562	DUF3511 domain-containing protein (AHRD V3.3 *** A0A1Q3CXE7_CEPFO)
Solyc10g086710.3.1	-1.08173	7.40935e-09	9.54031e-07	PAR1 (AHRD V3.3 *** A0A200R4T9_9MAGN)
Solyc11g006270.2.1	-1.08089	4.38561e-05	0.00118098	3-oxo-5-alpha-steroid 4-dehydrogenase (AHRD V3.3 *** A0A200PYH0_9MAGN)
Solyc02g090630.4.1	-1.07949	5.76623e-07	3.69558e-05	Patatin (AHRD V3.3 *** A0A2G3D8S9_CAPCH)
Solyc03g033550.3.1	-1.07635	0.00488648	0.0419243	WEB family protein (AHRD V3.3 *** A0A2I0VRX2_9ASPA)
Solyc04g011467.1.1	-1.07559	6.19335e-07	3.88961e-05	CASP-like protein (AHRD V3.3 *** A0A2G2XA87_CAPBA)
Solyc02g076770.1.1	-1.07529	0.000996869	0.0130564	abscisic acid receptor PYL4-like (AHRD V3.3 *** A0A2I4EQL0_9ROSI)
Solyc08g078170.1.1	-1.07481	3.26671e-06	0.000147094	Ethylene-responsive transcription factor 2 (AHRD V3.3 *** A0A2G3DC56_CAPCH)
Solyc12g015690.3.1	-1.07395	1.18716e-07	9.71297e-06	fasciclin-like arabinogalactan protein 1 (AHRD V3.3 *** A0A1U8G960_CAPAN)
Solyc12g089370.2.1	-1.07259	0.00102006	0.0132768	Peroxidase (AHRD V3.3 *** K4DH08_SOLLC)
Solyc07g063210.3.1	-1.07014	0.00125096	0.0154776	Expansin (AHRD V3.3 *** K4CH04_SOLLC)
Solyc02g065740.3.1	-1.06836	0.00479482	0.0413779	alpha-1,4-glucan-protein synthase [UDP-forming] 1-like (AHRD V3.3 *** A0A2G3A5L5_CAPAN)
Solyc06g054320.1.1	-1.0648	5.06104e-05	0.00131321	Dirigent protein (AHRD V3.3 *** K4C6B8_SOLLC)
Solyc04g079860.1.1	-1.06403	0.00150417	0.0178522	Hexosyltransferase (AHRD V3.3 *** A0A2G2ZRY0_CAPAN)
Solyc06g008930.3.1	-1.06289	3.20305e-06	0.000145591	Unknown protein
Solyc12g010550.1.1	-1.06116	0.000670967	0.00967793	counting factor 45-1-like (AHRD V3.3 --* XP_013669773.1)
Solyc06g083500.4.1	-1.05839	2.48019e-06	0.000118329	Serine/threonine-protein kinase PBS1 (AHRD V3.3 *** A0A2G2WN41_CAPBA)
Solyc09g014240.4.1	-1.05743	9.47303e-07	5.42077e-05	Laccase (AHRD V3.3 *** K4CRQ1_SOLLC)
Solyc09g098180.4.1	-1.0549	1.70085e-17	4.08777e-14	Pirin-like protein (AHRD V3.3 *** A0A2G3CR97_CAPCH)
Solyc11g008630.3.1	-1.04994	0.000227179	0.0042656	HXXXD-type acyl-transferase family protein (AHRD V3.3 *** A0A2U1LG13_ARTAN)
Solyc10g008900.3.1	-1.04797	4.65966e-06	0.000197337	Dirigent protein (AHRD V3.3 *** K4CY66_SOLLC)
Solyc11g007940.2.1	-1.04755	0.00310552	0.0304117	Protein BTR1 (AHRD V3.3 *** A0A2G2VF13_CAPBA)
Solyc05g056020.3.1	-1.04695	5.28463e-10	1.09639e-07	V-type proton ATPase subunit G (AHRD V3.3 *** A0A1U8GRL1_CAPAN)
Solyc02g078040.3.1	-1.04588	4.8448e-06	0.000202943	Pistil-specific extensin-like protein (AHRD V3.3 *-* A0A2G3A881_CAPAN)
Solyc12g011030.3.1	-1.04549	1.56595e-06	8.25167e-05	xyloglucan endotransglucosylase-hydrolase 9
Solyc03g114420.1.1	-1.04511	7.56089e-06	0.000288277	Calmodulin (AHRD V3.3 *** B6SJJ2_MAIZE)
Solyc06g072400.3.1	-1.04026	0.000293234	0.00520592	Type I inositol polyphosphate 5-phosphatase 5 (AHRD V3.3 *-* IP5P5_ARATH)
Solyc01g008650.3.1	-1.03933	1.88386e-05	0.000592815	Cytochrome (AHRD V3.3 *** A0A1U8F0H8_CAPAN)
Solyc12g042580.2.1	-1.03099	8.89261e-05	0.00204519	Plastocyanin-like (AHRD V3.3 *** A0A200PSX2_9MAGN)
Solyc02g070080.4.1	-1.03045	0.000140042	0.00292038	2-oxoglutarate (2OG) and Fe(II)-dependent oxygenase superfamily protein (AHRD V3.3 *** A0A2U1QGX7_ARTAN)
Solyc07g052660.1.1	-1.02941	1.02606e-06	5.80237e-05	Early nodulin-like protein 1-like (AHRD V3.3 *-* A0A2K3MXQ1_TRIPR)
Solyc04g082970.4.1	-1.02752	0.00225663	0.0241313	electron transporter%2C putative (Protein of unknown function%2C DUF547) (AHRD V3.3 *** AT5G66600.9)
Solyc04g082000.4.1	-1.02744	0.00421722	0.0377534	Phospholipase D (AHRD V3.3 *** K4BVS9_SOLLC)
Solyc05g005470.4.1	-1.02675	1.94716e-07	1.52808e-05	DC1 domain-containing protein (AHRD V3.3 *** A0A2U1QM98_ARTAN)
Solyc03g117100.3.1	-1.02591	0.00232006	0.0245908	PPPDE thiol peptidase family protein (AHRD V3.3 *-* O49393_ARATH)
Solyc01g006400.4.1	-1.02284	4.62751e-06	0.000196776	Pistil extensin like protein, partial CDS only (AHRD V3.3 *-* Q7DLN2_TOBAC)
Solyc05g008640.1.1	-1.02213	0.000168678	0.00336081	RING/U-box superfamily protein (AHRD V3.3 *-* A0A2U1QJE6_ARTAN)
Solyc01g095820.2.1	-1.02046	8.55617e-06	0.0003182	RING/U-box superfamily protein (AHRD V3.3 *-* A0A2U1KEI5_ARTAN)
Solyc03g122320.1.1	-1.02005	0.0050831	0.0429972	Unknown protein
Solyc12g013650.2.1	-1.01654	4.04185e-06	0.000176312	DUF1218 domain-containing protein (AHRD V3.3 *** A0A1Q3DB07_CEPFO)
Solyc11g069735.1.1	-1.01355	0.000100984	0.00226826	High-affinity nitrate transporter 2.2 (AHRD V3.3 *** NRT22_ORYSJ)
Solyc01g091660.3.1	-1.01098	3.52863e-10	7.98177e-08	NAD(P)-binding Rossmann-fold superfamily protein (AHRD V3.3 *** A0A2U1QER6_ARTAN),Pfam:PF13561
Solyc07g043640.3.1	-1.00759	0.00168885	0.0194092	AMP-dependent synthetase/ligase (AHRD V3.3 *** A0A200QNF3_9MAGN)
Solyc12g099730.3.1	-1.00386	0.000136998	0.00286623	DUF604 domain-containing protein (AHRD V3.3 *** A0A1Q3CIC6_CEPFO)
Solyc08g078920.2.1	-1.00288	7.27928e-06	0.000279359	Bifunctional inhibitor/lipid-transfer protein/seed storage 2S albumin superfamily protein (AHRD V3.3 *** A0A2U1PU47_ARTAN)
Solyc06g065970.1.1	-1.00273	0.00484782	0.0416857	Bifunctional inhibitor/lipid-transfer protein/seed storage 2S albumin superfamily protein (AHRD V3.3 *** A0A2U1PU47_ARTAN)
Solyc09g061890.3.1	-1.0022	4.01074e-05	0.00110006	Pectate lyase (AHRD V3.3 *** A0A2G2VZE8_CAPBA)
Solyc03g111720.3.1	-1.00185	4.45785e-05	0.00119375	Peptide methionine sulfoxide reductase (AHRD V3.3 *** MSRA_SOLLC)
Solyc12g088300.2.1	-1.00173	0.00266368	0.027329	hypothetical protein (AHRD V3.3 -** AT4G33800.2)
Solyc01g104110.4.1	-1.00122	6.15154e-11	2.15047e-08	11-S seed storage protein (AHRD V3.3 *** A0A2U1KM33_ARTAN)
