# Supplementary material for: Application of ethanol alleviates heat damage to leaf growth and yield in tomato
Source: Front Plant Sci. 2024 Feb 19;15:1325365. doi: 10.3389/fpls.2024.1325365 (PMC10909983; doi:10.3389/fpls.2024.1325365)
Supplement: Supplementary file 7 [file Table_6.xlsx]

## Sheet: UP
Supplemental Table S6. Up-regulated DEGs of E3H90m vs W3H90m in shoot (log2 fold change ≧ 1.0, p_value < 0.05, p_adj < 0.05).
GeneID	log2FoldChange	p_value	p_adj	Annotation	IDR
Solyc01g066270.3.1	4.57805	1.62266e-05	0.000237756	Unknown protein	TRUE
Solyc06g053570.2.1	4.33194	0.0006823	0.00584108	Nuclear-pore anchor protein (AHRD V3.3 *-* A0A142CD35_9LAMI)	TRUE
Solyc06g066490.1.1	4.31272	3.31284e-05	0.000443474	Avr9/Cf-9 rapidly elicited protein 146 (AHRD V3.3 *** Q9FQZ6_TOBAC)	TRUE
Solyc11g006785.1.1	4.27213	8.8363e-07	1.83823e-05	Unknown protein	TRUE
Solyc04g077370.2.1	4.19259	1.41152e-05	0.000211048	G-type lectin S-receptor-like serine/threonine-protein kinase (AHRD V3.3 *** A0A2G3CPH9_CAPCH)	FALSE
Solyc05g009490.3.1	3.9971	6.11785e-05	0.000759993	Unknown protein	FALSE
Solyc05g053050.1.1	3.94869	0.00899522	0.0464503	Cyclin-dependent protein kinase inhibitor SMR4 (AHRD V3.3 *** SMR4_ARATH)	TRUE
Solyc05g009610.1.1	3.94238	2.00353e-08	6.09593e-07	Alpha/beta-Hydrolases superfamily protein (AHRD V3.3 *** A0A2U1PVQ0_ARTAN)	FALSE
Solyc01g098130.2.1	3.89318	0.000421962	0.00393892	Unknown protein	FALSE
Solyc10g006810.4.1	3.83772	0.000732832	0.0061925	Unknown protein	TRUE
Solyc10g083940.1.1	3.67965	0.000126594	0.00141657	Major facilitator superfamily (AHRD V3.3 *** A0A2U1KPS1_ARTAN)	FALSE
Solyc05g007950.4.1	3.51888	0.0013692	0.0103196	LERNALE L.esculentum ribonuclease le	FALSE
Solyc03g025330.4.1	3.50932	0.000466679	0.00426046	Transmembrane protein, putative (DUF677) (AHRD V3.3 *** A0A1I9LNT4_ARATH)	FALSE
Solyc07g042470.3.1	3.50098	0.000492003	0.00444061	Small auxin up-regulated RNA64	TRUE
Solyc01g066260.2.1	3.47702	0.000399403	0.00377832	Unknown protein	TRUE
Solyc02g062960.4.1	3.42305	8.70007e-08	2.32587e-06	Homeobox-leucine zipper protein HOX14 (AHRD V3.3 *** A0A1U8FQP7_CAPAN)	TRUE
Solyc05g005520.1.1	3.36161	0.000753207	0.00633248	Protein phosphatase inhibitor 2-like (AHRD V3.3 *** A0A2K3NNM1_TRIPR)	TRUE
Solyc02g084850.3.1	3.31291	2.94964e-10	1.39013e-08	Abscisic acid and environmental stress-inducible protein TAS14 (AHRD V3.3 --* TAS14_SOLLC)	TRUE
Solyc05g056477.1.1	3.28529	0.000205033	0.00215102	NAC domain-containing protein (AHRD V3.3 *** A0A2K3LLY1_TRIPR)	FALSE
Solyc09g064820.1.1	3.27668	1.67308e-06	3.21441e-05	EID1-like F-box protein 3 (AHRD V3.3 *** A0A2G3BFQ9_CAPCH)	TRUE
Solyc11g069640.2.1	3.26438	0.00041303	0.00388015	Alpha carbonic anhydrase (AHRD V3.3 *** A0A200R5P3_9MAGN)	TRUE
Solyc04g083160.2.1	3.25356	0.000680666	0.00583255	Solyc04g083160	FALSE
Solyc08g078460.3.1	3.25001	0.00471191	0.0277942	Oxidoreductase family protein (AHRD V3.3 *** A0A2U1N6F1_ARTAN)	FALSE
Solyc01g095500.3.1	3.2172	0.00275993	0.0182594	Sl Cytokinin Response Factor 5	TRUE
Solyc01g066760.2.1	3.2055	0.00910058	0.0468678	Unknown protein	TRUE
Solyc08g068075.1.1	3.19513	0.00754646	0.0403847	Unknown protein	TRUE
Solyc12g056980.1.1	3.16966	0.000287803	0.00286643	Ethylene-responsive transcription factor (AHRD V3.3 *-* A0A2G2ZQC4_CAPAN)	TRUE
Solyc10g079290.2.1	3.15249	0.00409877	0.0250501	Outer envelope protein 80, chloroplastic (AHRD V3.3 *** A0A2G2V0H4_CAPBA)	TRUE
Solyc01g005800.3.1	3.15124	0.00847582	0.0442699	Calmodulin binding protein (AHRD V3.3 *** A0A2K3N563_TRIPR)	TRUE
Solyc04g008830.1.1	3.14496	0.00331973	0.021122	Leucine-rich repeat receptor-like protein kinase (AHRD V3.3 *** A0A2R6PGF8_ACTCH)	FALSE
Solyc06g009770.1.1	3.11249	0.00048295	0.00437839	hypothetical protein (AHRD V3.3 *** AT3G62650.2)	FALSE
Solyc08g077900.3.1	3.10878	6.26323e-07	1.35378e-05	Expansin-like B1 (AHRD V3.3 *** A0A1U8GH71_CAPAN)	FALSE
Solyc03g093560.1.1	3.08766	1.576e-11	9.17792e-10	ethylene response factor C.6	TRUE
Solyc02g084600.4.1	3.08133	0.00675053	0.037136	Leucine-rich repeat receptor-like protein kinase family protein (AHRD V3.3 *-* A0A061DFG6_THECC)	TRUE
Solyc04g005920.1.1	3.06809	0.00979654	0.0494178	micronuclear linker histone polyprotein-like protein (AHRD V3.3 *** AT3G25590.1)	TRUE
Solyc07g055910.4.1	3.00361	0.00559688	0.0317939	hypothetical protein (AHRD V3.3 *-* AT3G58770.1)	TRUE
Solyc03g007150.3.1	2.99448	0.00121321	0.00934092	AT-hook motif nuclear-localized protein 1 (AHRD V3.3 *** A0A2G3CVX9_CAPCH)	TRUE
Solyc09g005610.4.1	2.98273	6.6174e-06	0.000109857	Transcription factor (AHRD V3.3 *** A0A2U1LZI0_ARTAN)	TRUE
Solyc01g150126.1.1	2.96411	2.97166e-09	1.12973e-07	Calcium-binding EF-hand (AHRD V3.3 *-* A0A2U1P7H3_ARTAN)	FALSE
Solyc08g069180.3.1	2.93912	0.00677486	0.0371953	Protein kinase domain (AHRD V3.3 *** A0A200QZ79_9MAGN)	TRUE
Solyc04g014950.4.1	2.936	0.00287449	0.0188465	Glycosyltransferase (AHRD V3.3 *-* A0A200QMY3_9MAGN)	FALSE
Solyc03g005970.4.1	2.91135	0.00167154	0.0121583	RBR-type E3 ubiquitin transferase (AHRD V3.3 *** A0A2G2WW46_CAPBA)	FALSE
Solyc08g082370.1.1	2.85812	0.000454812	0.00417925	Unknown protein	TRUE
Solyc01g020520.4.1	2.84836	0.000722847	0.00612511	Membrane-bound transcription factor site-2 protease (AHRD V3.3 *** A0A200QAL7_9MAGN)	FALSE
Solyc05g018050.1.1	2.82788	0.000874347	0.00716535	RING/U-box superfamily protein (AHRD V3.3 *-* A0A2U1KYA3_ARTAN)	FALSE
Solyc03g119910.4.1	2.82667	0.00541268	0.0310173	Le3OH-23b-hydroxylase	FALSE
Solyc02g021600.1.1	2.8072	0.00747924	0.0401072	F-box/kelch-repeat protein (AHRD V3.3 *** A0A2G2VW95_CAPBA)	FALSE
Solyc10g080670.2.1	2.80216	1.5921e-22	8.5627e-20	Transmembrane protein, putative (AHRD V3.3 *** A2Q5V9_MEDTR)	TRUE
Solyc03g093540.1.1	2.79455	0.000193219	0.0020435	Ethylene-responsive transcription factor 5 (AHRD V3.3 *** ERF5_TOBAC)	TRUE
Solyc06g051540.4.1	2.76996	0.00476942	0.028061	Protein kinase domain (AHRD V3.3 *** A0A200PWY1_9MAGN)	TRUE
Solyc01g068490.4.1	2.73157	0.00246889	0.0166468	RING-type E3 ubiquitin transferase (AHRD V3.3 *** A0A200RD53_9MAGN)	TRUE
Solyc02g071830.3.1	2.7114	0.00201024	0.0141219	plant/protein (DUF810) (AHRD V3.3 *-* AT5G06970.1)	FALSE
Solyc09g010160.3.1	2.6909	7.59743e-05	0.000914593	NAC domain-containing protein 90 (AHRD V3.3 *** A0A2G2YPI7_CAPAN)	TRUE
Solyc03g120420.3.1	2.68967	5.86038e-09	2.0768e-07	Unknown protein	FALSE
Solyc02g032800.1.1	2.68368	0.00230107	0.0157534	Senescence regulator S40 (AHRD V3.3 *** A0A200QJC6_9MAGN)	TRUE
Solyc07g008280.4.1	2.64694	0.000151346	0.00166018	cytochrome P450 family protein (AHRD V3.3 -** AT3G15760.1)	FALSE
Solyc08g067630.3.1	2.64467	0.000274432	0.00276246	histone deacetylase-like protein (AHRD V3.3 *** AT2G25625.2)	TRUE
Solyc10g078440.2.1	2.64103	6.663e-07	1.43004e-05	Sigma factor binding protein 1, chloroplastic (AHRD V3.3 *** A0A2G3BI49_CAPCH)	TRUE
Solyc10g008830.2.1	2.63821	0.00984675	0.0496111	GDSL esterase/lipase (AHRD V3.3 *** A0A2G3BD38_CAPCH)	FALSE
Solyc03g025740.4.1	2.63464	0.00337735	0.0214141	Zf-CCHC domain-containing protein/Cofilin_ADF domain-containing protein (AHRD V3.3 *** A0A1Q3D772_CEPFO)	TRUE
Solyc05g009650.4.1	2.6163	1.46323e-09	5.98583e-08	Unknown protein	TRUE
Solyc10g074560.2.1	2.60535	0.00129545	0.00985789	nucleolar complex protein 4 homolog (AHRD V3.3 *** A0A2I4GCB9_9ROSI)	TRUE
Solyc11g011240.1.1	2.5941	0.00956122	0.0485522	geranylgeranyl pyrophosphate synthase 1	TRUE
Solyc11g005720.1.1	2.58572	0.0025993	0.0173244	VQ motif family protein (AHRD V3.3 *** B6SZE5_MAIZE)	TRUE
Solyc04g072920.4.1	2.56516	0.00158302	0.0116347	Trehalose 6-phosphate phosphatase (AHRD V3.3 *** A0A2G3CNJ5_CAPCH)	TRUE
Solyc03g112630.3.1	2.55661	1.88267e-05	0.000270012	plant UBX domain-containing protein 10-like (AHRD V3.3 *** A0A2G2XZ29_CAPAN)	TRUE
Solyc09g009400.4.1	2.55548	0.00188231	0.0133774	APO domain (AHRD V3.3 *** A0A200QVA6_9MAGN)	FALSE
Solyc03g019960.3.1	2.55397	0.00134432	0.0101706	CDT1 Geminin-binding domain-like protein (AHRD V3.3 *** A0A2U1N3U2_ARTAN)	TRUE
Solyc11g011740.1.1	2.52784	3.56404e-05	0.000472946	Ethylene-responsive transcription factor (AHRD V3.3 *** F1DGA5_COFAR)	TRUE
Solyc01g088810.4.1	2.50289	0.000694177	0.00592888	Ankyrin repeat-containing protein (AHRD V3.3 *** A0A2U1MGK0_ARTAN)	TRUE
Solyc05g010030.4.1	2.49713	0.0017147	0.012408	Unknown protein	TRUE
Solyc06g075690.3.1	2.47695	2.2603e-08	6.77573e-07	auxin-regulated protein AF416289	TRUE
Solyc09g091660.3.1	2.47673	2.57516e-12	1.77696e-10	Pleiotropic drug resistance protein (AHRD V3.3 *** C8CA13_CUCSA)	TRUE
Solyc12g042460.2.1	2.46822	0.00667343	0.0367831	4-coumarate:CoA ligase (AHRD V3.3 *** Q42879_LITER)	FALSE
Solyc03g117330.4.1	2.46294	1.31671e-06	2.60861e-05	Proline-tRNA ligase (AHRD V3.3 *** X8JBM9_9HOMO)	TRUE
Solyc04g009980.4.1	2.4369	3.14134e-07	7.32686e-06	Protein LIGHT-DEPENDENT SHORT HYPOCOTYLS 6 (AHRD V3.3 *** A0A2G3CE82_CAPCH)	TRUE
Solyc04g006990.3.1	2.43042	0.000311416	0.00306488	bHLH transcription factor 029	TRUE
Solyc09g005020.1.1	2.39701	0.00200904	0.0141189	hypothetical protein (DUF688) (AHRD V3.3 *** AT3G51760.4)	TRUE
Solyc10g074880.3.1	2.36458	0.00198283	0.0139722	protein RETICULATA-RELATED 3, chloroplastic-like (AHRD V3.3 *** A0A2I4E4T7_9ROSI)	FALSE
Solyc11g070150.2.1	2.34743	0.000839403	0.00691723	Histidine-containing phosphotransfer protein 4 (AHRD V3.3 *** A0A2G2YI23_CAPAN)	FALSE
Solyc12g088840.1.1	2.34257	0.00167544	0.0121769	EF-hand domain (AHRD V3.3 *** A0A200QZB4_9MAGN)	FALSE
Solyc04g051690.4.1	2.33384	1.75405e-09	7.04598e-08	WRKY transcription factor 51	TRUE
Solyc06g053980.3.1	2.33135	1.5956e-08	5.00466e-07	Chlorophyllase 2 (AHRD V3.3 *** A0A2U1KJW6_ARTAN)	FALSE
Solyc06g068130.3.1	2.31323	8.33865e-09	2.85009e-07	Tetratricopeptide repeat (TPR)-like superfamily protein (AHRD V3.3 *-* F4K464_ARATH)	TRUE
Solyc08g083130.4.1	2.31294	3.59689e-05	0.000475983	Homeobox-leucine zipper protein HOX6 (AHRD V3.3 *** A0A2G3DAJ5_CAPCH)	TRUE
Solyc04g077620.1.1	2.30836	5.20439e-06	8.86928e-05	Uncharacterized conserved protein UCP031279 (AHRD V3.3 -** AT1G10140.1)	TRUE
Solyc07g056190.3.1	2.30019	3.57276e-10	1.65396e-08	Heavy metal-associated isoprenylated plant protein (AHRD V3.3 *** A0A2R6QEC1_ACTCH)	FALSE
Solyc11g072830.1.1	2.29978	0.00549296	0.0313497	Chitinase (AHRD V3.3 *** A0A2K3PML7_TRIPR)	FALSE
Solyc08g075880.4.1	2.29846	0.00557309	0.0316883	Heavy metal-associated isoprenylated plant protein (AHRD V3.3 *** A0A2R6PHP1_ACTCH)	FALSE
Solyc10g080240.1.1	2.29834	0.00200321	0.0140833	Remorin (AHRD V3.3 *-* E5GBY5_CUCME)	TRUE
Solyc09g065390.1.1	2.29244	1.33486e-06	2.62466e-05	DUF581 domain-containing protein (AHRD V3.3 *** A0A1Q3D4G2_CEPFO)	TRUE
Solyc01g095630.3.1	2.28377	9.29287e-16	1.33803e-13	WRKY transcription factor 41	FALSE
Solyc02g089630.3.1	2.28143	8.08439e-09	2.76837e-07	Proline dehydrogenase (AHRD V3.3 *** A0A2G2XIU2_CAPBA)	FALSE
Solyc08g007800.3.1	2.27258	0.00749638	0.0401637	SPX domain-containing protein (AHRD V3.3 *** D7MDY2_ARALL)	TRUE
Solyc03g094010.3.1	2.27192	0.00258899	0.0172782	Glutamate dehydrogenase (AHRD V3.3 *** A0A1U8GQ51_CAPAN)	FALSE
Solyc01g068360.4.1	2.26377	0.00359877	0.0225235	Leucine-rich repeat protein kinase family protein (AHRD V3.3 *-* A0A2U1Q3K2_ARTAN)	FALSE
Solyc03g007230.4.1	2.25065	1.62818e-09	6.61619e-08	Protein phosphatase 2C (AHRD V3.3 *** A0A2U1KYU0_ARTAN)	TRUE
Solyc09g015770.3.1	2.24558	2.28318e-14	2.47043e-12	WRKY transcription factor 81	TRUE
Solyc08g008280.3.1	2.2423	0.000509854	0.00457244	WRKY transcription factor 53	TRUE
Solyc04g079760.4.1	2.23491	8.74902e-07	1.82215e-05	UPF0114 domain-containing protein (AHRD V3.3 *** A0A1Q3D8A0_CEPFO)	FALSE
Solyc09g092020.4.1	2.23032	0.00150547	0.0111453	Calcium-dependent protein kinase (AHRD V3.3 *-* B2KTA0_WHEAT)	FALSE
Solyc03g005660.4.1	2.2284	0.00544159	0.0311342	Disease resistance protein (AHRD V3.3 *** A0A2U1N8H9_ARTAN)	FALSE
Solyc04g014360.3.1	2.22147	0.00353749	0.0222138	bHLH transcription factor 032	TRUE
Solyc07g065460.1.1	2.21713	0.00043833	0.00404405	UPA24 (AHRD V3.3 *-* C8YZB6_CAPAN)	TRUE
Solyc08g082110.4.1	2.20715	1.67109e-05	0.000243681	WRKY transcription factor 54	TRUE
Solyc05g052040.1.1	2.18551	0.000944323	0.0076339	ripening regulated protein DDTFR10/A	TRUE
Solyc06g083220.3.1	2.16303	5.15605e-05	0.000655201	P-loop containing nucleoside triphosphate hydrolases superfamily protein (AHRD V3.3 *** A0A2K3MR94_TRIPR)	TRUE
Solyc12g010720.1.1	2.15878	0.00164227	0.0119958	Protein EPIDERMAL PATTERNING FACTOR 1 (AHRD V3.3 *** A0A2G2YTN2_CAPAN),Pfam:PF17181	FALSE
Solyc11g012130.2.1	2.15268	4.19399e-12	2.72923e-10	Early nodulin-like protein 2-like (AHRD V3.3 *** A0A2K3MQQ9_TRIPR)	FALSE
Solyc02g079510.3.1	2.15171	0.0071685	0.038856	Peroxidase (AHRD V3.3 *** M1C184_SOLTU)	TRUE
Solyc12g150132.1.1	2.15094	0.00846897	0.0442468	extensin-2-like (AHRD V3.3 *-* A0A1U8ESB3_CAPAN)	FALSE
Solyc03g119310.3.1	2.14326	2.9378e-12	1.97502e-10	Unknown protein	TRUE
Solyc07g008570.3.1	2.14174	0.00531342	0.0305635	Purple acid phosphatase (AHRD V3.3 *** A0A2G2WCI9_CAPBA)	FALSE
Solyc12g009680.2.1	2.13129	0.00114967	0.00896881	Heptahelical transmembrane protein 1 (AHRD V3.3 *** A0A1U8E8P1_CAPAN)	FALSE
Solyc05g052030.1.1	2.12273	9.14514e-07	1.88958e-05	ethylene response factor 4	TRUE
Solyc01g110810.3.1	2.11528	0.00257956	0.0172279	Unknown protein	FALSE
Solyc07g008210.4.1	2.11139	1.76837e-09	7.07581e-08	Tetratricopeptide repeat (TPR)-like superfamily protein (AHRD V3.3 *-* F4K464_ARATH)	TRUE
Solyc10g084070.1.1	2.10882	0.000254416	0.00258602	Unknown protein	FALSE
Solyc04g150163.1.1	2.08233	0.00962911	0.0487751	Unknown protein	FALSE
Solyc06g074030.1.1	2.06047	1.18557e-08	3.85755e-07	Polynucleotidyl transferase, ribonuclease H-like superfamily protein (AHRD V3.3 *** A0A2U1M9A7_ARTAN)	FALSE
Solyc01g109810.2.1	2.05182	3.72262e-05	0.000490432	tRNA-methyltransferase non-catalytic subunit trm6MTase subunit (AHRD V3.3 *** Q9FJZ5_ARATH)	TRUE
Solyc01g096320.3.1	2.0456	1.26326e-07	3.27659e-06	Homeobox-leucine zipper protein HOX6 (AHRD V3.3 *** A0A1U8DTA9_CAPAN)	FALSE
Solyc11g069940.1.1	2.04061	4.24181e-09	1.54513e-07	Glutaredoxin (AHRD V3.3 *** A0A118JSL8_CYNCS)	FALSE
Solyc05g007770.3.1	2.04039	0.00202775	0.0142394	NAC domain TF	TRUE
Solyc07g043500.1.1	2.04018	1.05029e-08	3.473e-07	Glycosyltransferase (AHRD V3.3 *** C5NN15_CATRO)	TRUE
Solyc01g107090.2.1	2.03909	5.33803e-10	2.39831e-08	beta-1%2C4-xylosidase (AHRD V3.3 *** AT3G19615.1)	TRUE
Solyc04g009860.4.1	2.03758	4.33917e-10	1.97378e-08	2-oxoglutarate (2OG) and Fe(II)-dependent oxygenase superfamily protein (AHRD V3.3 *** A0A2U1QA13_ARTAN)	FALSE
Solyc03g116100.3.1	2.03604	5.14282e-13	4.05352e-11	R2R3MYB transcription factor 31	TRUE
Solyc06g072080.3.1	2.03573	0.00841767	0.0440416	ubiquitin activating enzyme	FALSE
Solyc08g006990.3.1	2.03108	1.96471e-09	7.77636e-08	Aluminum activated malate transporter family protein (AHRD V3.3 *** A0A2U1QG27_ARTAN)	TRUE
Solyc05g007510.4.1	2.03069	0.000156074	0.00170285	RNA-directed RNA polymerase	TRUE
Solyc03g112700.1.1	2.03047	0.000414716	0.00389097	Herbivore elicitor-regulated 1 (AHRD V3.3 *** S5ZR43_NICAT)	TRUE
Solyc06g053220.3.1	2.03035	0.00707583	0.0384513	Homeobox-leucine zipper protein HOX6 (AHRD V3.3 *** A0A2G2WIJ7_CAPBA)	TRUE
Solyc01g090440.2.1	1.99822	0.00131949	0.0100129	cotton fiber protein (AHRD V3.3 *-* AT3G60380.1)	TRUE
Solyc06g008560.2.1	1.97271	0.000328931	0.00320279	ternary complex factor MIP1 leucine-zipper protein (Protein of unknown function%2C DUF547) (AHRD V3.3 *** AT2G39690.1)	TRUE
Solyc08g068730.1.1	1.96785	0.00776224	0.0413097	Tyramine n-hydroxycinnamoyl transferase (AHRD V3.3 *** Q5D8C0_CAPAN)	FALSE
Solyc03g123510.3.1	1.96567	2.10797e-07	5.16014e-06	GDSL esterase/lipase 5-like (AHRD V3.3 *-* A0A1U8G673_CAPAN)	FALSE
Solyc02g089690.3.1	1.95552	0.000309945	0.00305205	Protein trichome birefringence-like 19 (AHRD V3.3 *** A0A2G2XIK2_CAPBA)	FALSE
Solyc06g071820.3.1	1.95184	5.06138e-13	4.02402e-11	BTB/POZ and TAZ domain-containing protein 1 (AHRD V3.3 *** A0A2G3BFP5_CAPCH)	TRUE
Solyc09g007420.4.1	1.93622	0.0030321	0.0196126	Glycosyltransferases (AHRD V3.3 *** K4CQD1_SOLLC)	TRUE
Solyc04g074740.4.1	1.92983	0.000785585	0.00654908	Blue copper protein (AHRD V3.3 *** A0A2G2ZQN6_CAPAN)	TRUE
Solyc06g009840.3.1	1.91997	0.00995311	0.0499595	Fumarate hydratase class II (AHRD V3.3 *-* A0A2T1B859_9BURK)	FALSE
Solyc03g007870.3.1	1.91107	8.08358e-19	2.08192e-16	heavy metal-associated isoprenylated plant protein 3-like (AHRD V3.3 *** A0A1U8G733_CAPAN)	TRUE
Solyc02g061990.3.1	1.90578	0.00967189	0.0489646	BZIP transcription factor FD (AHRD V3.3 *** A0A2U1NCD2_ARTAN)	TRUE
Solyc04g079230.4.1	1.90021	2.95563e-05	0.000401535	Patatin (AHRD V3.3 *-* A0A2G2X0P8_CAPBA)	FALSE
Solyc08g080090.3.1	1.89134	7.40582e-16	1.09212e-13	green flesh	TRUE
Solyc10g079190.3.1	1.88846	0.00116569	0.00906284	Zinc finger transcription factor 61	TRUE
Solyc09g091650.3.1	1.86765	0.00996092	0.049985	Replication factor C subunit 1 (AHRD V3.3 *-* A0A1Z5JWY4_FISSO)	TRUE
Solyc03g123580.4.1	1.86542	0.000496608	0.00447338	LL-diaminopimelate aminotransferase (AHRD V3.3 *-* AT3G14280.1)	FALSE
Solyc11g012600.3.1	1.85057	0.00301044	0.0195209	Ribosome associated membrane protein RAMP4 (AHRD V3.3 -** AT1G27350.1)	FALSE
Solyc04g082050.3.1	1.84861	0.00289829	0.018955	Cellular retinaldehyde-binding/triple function, C-terminal (AHRD V3.3 *** B6SN40_MAIZE)	FALSE
Solyc04g006970.4.1	1.83337	2.36111e-05	0.000329079	Phosphoenolpyruvate carboxylase (AHRD V3.3 *** A6YM33_RICCO)	TRUE
Solyc02g087890.4.1	1.82777	0.0010647	0.00841	Unknown protein	FALSE
Solyc09g008430.4.1	1.82566	0.00652689	0.0361074	CHY zinc finger family protein, expressed (AHRD V3.3 *** Q337P2_ORYSJ)	FALSE
Solyc02g092770.3.1	1.8196	0.000258246	0.00261778	Sigma-B regulation protein RsbQ (AHRD V3.3 *** A0A2V2Z439_9BACL)	FALSE
Solyc01g005670.3.1	1.81364	0.00643972	0.0357164	BTB/POZ domain-containing protein (AHRD V3.3 *** A0A2I0X876_9ASPA)	TRUE
Solyc03g119250.4.1	1.81308	0.000294171	0.00291151	Calmodulin binding protein-like (AHRD V3.3 *** A0A200Q136_9MAGN)	TRUE
Solyc06g067980.3.1	1.80936	2.73313e-07	6.50513e-06	repressed By RIM101 protein 1 (AHRD V3.3 --* XP_011091441.1)	TRUE
Solyc02g077880.3.1	1.79468	1.04132e-08	3.45582e-07	Auxin-repressed protein (AHRD V3.3 *** A9YSI8_TOBAC)	TRUE
Solyc09g089650.1.1	1.79263	4.75459e-11	2.57226e-09	hypothetical protein (AHRD V3.3 *** AT1G04330.1)	TRUE
Solyc09g055260.4.1	1.78836	0.000252449	0.00256745	E3 ubiquitin-protein ligase listerin (AHRD V3.3 *** A0A2I4FA41_9ROSI)	TRUE
Solyc05g051060.3.1	1.78655	0.00191752	0.0135975	Homeodomain-like superfamily protein (AHRD V3.3 *** A0A2U1PJR7_ARTAN)	TRUE
Solyc08g016415.1.1	1.77914	0.000136642	0.0015134	hypothetical protein (AHRD V3.3 *** AT2G38465.1)	TRUE
Solyc02g086800.4.1	1.77615	0.000756571	0.00635244	Phospholipid-transporting ATPase (AHRD V3.3 *** A0A1U8FQP5_CAPAN)	FALSE
Solyc03g112930.3.1	1.77593	0.000429127	0.00398731	Dof zinc finger protein (AHRD V3.3 *** A0A2K3NDY2_TRIPR)	TRUE
Solyc01g110310.3.1	1.77136	3.6493e-20	1.36186e-17	GATA transcription factor (AHRD V3.3 *** K4B3P4_SOLLC)	TRUE
Solyc07g045140.4.1	1.76764	0.000353255	0.00341598	transmembrane protein (AHRD V3.3 *** AT4G12680.1)	TRUE
Solyc06g059870.1.1	1.7668	2.70714e-27	2.91193e-24	Unknown protein	TRUE
Solyc09g092260.4.1	1.75954	0.000955141	0.00770433	Chaperone protein DnaJ (AHRD V3.3 *** A0A2G3AV72_CAPCH)	TRUE
Solyc09g061890.3.1	1.74862	0.00577841	0.0325721	Pectate lyase (AHRD V3.3 *** A0A2G2VZE8_CAPBA)	TRUE
Solyc08g068690.1.1	1.74685	4.10044e-07	9.2683e-06	Tyramine n-hydroxycinnamoyl transferase (AHRD V3.3 *** Q5D8C0_CAPAN)	FALSE
Solyc07g056200.3.1	1.74328	2.85051e-07	6.7133e-06	Heavy metal-associated isoprenylated plant protein (AHRD V3.3 *** A0A2R6QEC1_ACTCH)	TRUE
Solyc03g118810.1.1	1.74178	8.33127e-08	2.23054e-06	Calcium-binding allergen Ole e 8 (AHRD V3.3 *** A0A2G2WQF6_CAPBA)	TRUE
Solyc07g062810.4.1	1.73958	5.18646e-09	1.86325e-07	D-amino-acid transaminase, chloroplastic (AHRD V3.3 *** A0A2G2Z4Z6_CAPAN)	FALSE
Solyc10g083530.2.1	1.73938	0.000634584	0.00550736	histone-lysine N-methyltransferase SETD1B-like protein (AHRD V3.3 *** AT5G03670.1)	TRUE
Solyc03g031980.4.1	1.73907	0.0066743	0.0367831	Lectin-receptor kinase (AHRD V3.3 *** A0A2U1KV35_ARTAN)	FALSE
Solyc01g110600.2.1	1.73657	0.00472825	0.0278816	Unknown protein	FALSE
Solyc12g057060.2.1	1.73527	0.000167572	0.00181444	Glycosyltransferase (AHRD V3.3 *** A0A2G3CNS7_CAPCH)	FALSE
Solyc01g009860.3.1	1.73435	3.45034e-14	3.62603e-12	NAC domain-containing protein (AHRD V3.3 *** A0A2K3LZ45_TRIPR)	TRUE
Solyc12g062290.2.1	1.7311	0.000482431	0.00437586	Protease Do-like 9 (AHRD V3.3 *** A0A2G2UZN1_CAPBA)	TRUE
Solyc10g008280.3.1	1.72548	0.0016194	0.0118727	Protein kinase domain (AHRD V3.3 *** A0A200QBC6_9MAGN)	TRUE
Solyc12g007040.3.1	1.7153	3.9442e-06	6.92831e-05	Protein kinase, catalytic domain-containing protein (AHRD V3.3 *** A0A2U1L8L5_ARTAN)	FALSE
Solyc01g086670.3.1	1.70848	1.25946e-06	2.50331e-05	Unknown protein	FALSE
Solyc01g079530.4.1	1.7083	5.47484e-07	1.19896e-05	RING/FYVE/PHD zinc finger superfamily protein (AHRD V3.3 *** A0A2U1LZL6_ARTAN)	TRUE
Solyc01g068075.1.1	1.70498	0.00238415	0.0161949	Unknown protein	FALSE
Solyc11g010430.2.1	1.70121	6.94343e-06	0.000114077	Dihydrofolate reductase-like protein (AHRD V3.3 *** A0A2K3MS55_TRIPR)	FALSE
Solyc02g093610.3.1	1.69295	0.00113697	0.00889252	BAG family molecular chaperone regulator 2-like (AHRD V3.3 *** A0A2I4HMN0_9ROSI)	FALSE
Solyc12g087950.1.1	1.68375	9.79986e-06	0.00015435	AT-hook motif nuclear-localized protein (AHRD V3.3 *** A0A1U8GD78_CAPAN)	TRUE
Solyc11g065940.2.1	1.68176	0.00205777	0.0144225	ENTH/VHS-like protein (AHRD V3.3 *** A0A2U1LWI0_ARTAN)	TRUE
Solyc11g073120.2.1	1.68119	8.25079e-06	0.000133517	R2R3MYB transcription factor 58	TRUE
Solyc11g068620.2.1	1.68038	3.87035e-10	1.77581e-08	NAC domain (AHRD V3.3 *** A0A200Q6H1_9MAGN)	FALSE
Solyc03g114710.4.1	1.67945	0.00250782	0.016872	Glycosyltransferase (AHRD V3.3 *** A0A328DB01_9ASTE)	TRUE
Solyc06g072630.4.1	1.67513	0.00015636	0.00170334	Bidirectional sugar transporter SWEET (AHRD V3.3 *** A0A2G3CA74_CAPCH)	FALSE
Solyc08g067210.3.1	1.67291	0.000768426	0.00643087	Dicer-like 3	FALSE
Solyc04g014400.4.1	1.67191	0.00117039	0.00909166	LOW QUALITY PROTEIN: LRR receptor-like serine/threonine-protein kinase GSO1 (AHRD V3.3 *** A0A1U8F7A0_CAPAN)	FALSE
Solyc04g079940.3.1	1.66914	1.41418e-09	5.83741e-08	NAC domain-containing protein (AHRD V3.3 *** A0A2U1N781_ARTAN)	TRUE
Solyc05g051400.4.1	1.66719	1.61964e-08	5.06269e-07	Mitochondrial uncoupling protein 6 (AHRD V3.3 *** A0A2G3CG15_CAPCH)	TRUE
Solyc04g082380.4.1	1.65655	1.83077e-05	0.000263395	cytochrome P450 86A8-like (AHRD V3.3 *-* A0A2I4DDX4_9ROSI)	TRUE
Solyc05g052550.1.1	1.65228	5.64276e-09	2.00746e-07	Zinc finger CCCH domain-containing protein 47 (AHRD V3.3 *-* A0A1U8GQ71_CAPAN)	TRUE
Solyc06g073730.2.1	1.6492	0.00925241	0.0474186	LeEIL4EIN3-like	TRUE
Solyc09g061715.1.1	1.64843	4.49521e-05	0.000580915	hypothetical protein (AHRD V3.3 *-* AT3G24750.1)	TRUE
Solyc03g006360.3.1	1.64677	0.00520579	0.0300578	Auxin-repressed protein (AHRD V3.3 *** A9YSI8_TOBAC)	TRUE
Solyc10g078590.2.1	1.64021	2.66952e-10	1.27454e-08	Jacalin-related lectin 3 (AHRD V3.3 *-* A0A2G3BI13_CAPCH)	TRUE
Solyc12g006230.3.1	1.6378	0.00989023	0.0497395	RING/U-box superfamily protein (AHRD V3.3 *** AT2G04240.2)	FALSE
Solyc06g066460.3.1	1.63544	0.00131472	0.00999208	Nuclear poly(A) polymerase 4 (AHRD V3.3 *-* A0A2G2ZBI7_CAPAN)	TRUE
Solyc05g005260.3.1	1.63024	1.22933e-09	5.10899e-08	DNA ligase 1-like (AHRD V3.3 *** A0A1U7VHC8_NICSY)	TRUE
Solyc04g081700.3.1	1.62957	0.00166299	0.0121153	Unknown protein	FALSE
Solyc02g083000.1.1	1.62792	9.25587e-06	0.000146921	DUF241 domain-containing protein (AHRD V3.3 *** A0A1Q3CEB1_CEPFO)	TRUE
Solyc12g100000.3.1	1.62781	0.00746874	0.0400744	RING-type E3 ubiquitin transferase (AHRD V3.3 *** A0A2G3CB55_CAPCH)	TRUE
Solyc04g079050.3.1	1.62763	0.000384639	0.00367285	UDP-glycosyltransferase 79B2 (AHRD V3.3 *** A0A2G3CJJ2_CAPCH)	FALSE
Solyc01g100960.3.1	1.61929	0.000247099	0.00252146	Glucose-6-phosphate 1-dehydrogenase (AHRD V3.3 *** A0A1U8GXG1_CAPAN)	FALSE
Solyc09g065240.3.1	1.61343	0.000130233	0.00145121	Patatin (AHRD V3.3 *** A0A2G3CVC2_CAPCH)	FALSE
Solyc05g009790.1.1	1.61128	3.39827e-08	9.86361e-07	AP2/B3 transcription factor family protein (AHRD V3.3 *** A0A2U1LJK2_ARTAN)	TRUE
Solyc06g072220.1.1	1.61064	9.20617e-05	0.00107629	miraculin-like (AHRD V3.3 *** A0A2I4HMC5_9ROSI)	FALSE
Solyc10g055760.2.1	1.60931	2.75668e-10	1.30932e-08	NAC domain-containing protein 2 (AHRD V3.3 *** A0A1U8EDX1_CAPAN)	TRUE
Solyc08g066770.3.1	1.60714	5.02205e-08	1.41282e-06	Ankyrin repeat (AHRD V3.3 *** A0A200QDM7_9MAGN)	TRUE
Solyc03g093550.1.1	1.60412	4.54696e-14	4.6192e-12	Ethylene-responsive transcription factor 5 (AHRD V3.3 *** A0A2G3CVP7_CAPCH)	TRUE
Solyc03g119320.1.1	1.60025	0.00102149	0.00814073	hypothetical protein (AHRD V3.3 *** AT1G48780.1)	TRUE
Solyc10g009110.1.1	1.59912	3.42475e-07	7.87735e-06	ethylene response factor F.5	TRUE
Solyc02g079870.4.1	1.59849	2.90879e-12	1.96274e-10	Unknown protein	FALSE
Solyc01g108170.3.1	1.59673	9.76434e-08	2.57649e-06	BEST plant protein match is: (TAIR:plant.1) protein, putative (AHRD V3.3 *** G7JLA4_MEDTR)	FALSE
Solyc09g010650.1.1	1.59532	0.00335145	0.0212794	RING/U-box superfamily protein (AHRD V3.3 *-* A0A2U1QK74_ARTAN)	TRUE
Solyc11g010250.1.1	1.59518	0.000152726	0.0016743	Avr9/Cf-9 rapidly elicited protein 75 (AHRD V3.3 *** Q9FQY9_TOBAC)	FALSE
Solyc09g014860.3.1	1.59457	0.000169588	0.00183279	Protein LURP-one-related 15 (AHRD V3.3 *** A0A2G2ZQX5_CAPAN)	FALSE
Solyc01g010250.4.1	1.5942	0.000113601	0.00128865	6-phosphogluconolactonase (AHRD V3.3 *** B6U0H2_MAIZE)	FALSE
Solyc05g053590.4.1	1.59056	0.000216524	0.0022522	Pleiotropic drug resistance protein (AHRD V3.3 *** C8CA13_CUCSA)	FALSE
Solyc09g005730.4.1	1.59032	2.01274e-05	0.000286643	Plant protein 1589 of Uncharacterized protein function (AHRD V3.3 *** A0A061EZD3_THECC)	TRUE
Solyc04g054500.3.1	1.58831	1.22157e-09	5.08829e-08	Heavy metal-associated isoprenylated plant protein (AHRD V3.3 *** A0A2R6R672_ACTCH)	FALSE
Solyc06g011450.3.1	1.58577	0.00424881	0.0257179	Clathrin assembly protein (AHRD V3.3 *** A0A2K3ND59_TRIPR)	TRUE
Solyc06g009140.3.1	1.58419	1.31588e-16	2.29163e-14	Late embryogenesis abundant protein Lea5 (AHRD V3.3 *** A0A1J3JXG8_NOCCA)	TRUE
Solyc05g005930.3.1	1.58412	9.938e-07	2.03046e-05	Glycosyltransferase (AHRD V3.3 *** A0A2I4G8J4_9ROSI)	FALSE
Solyc05g053500.4.1	1.57708	3.57472e-16	5.83638e-14	GATA transcription factor (AHRD V3.3 *** G7K6G0_MEDTR)	TRUE
Solyc04g076220.3.1	1.57559	0.00453035	0.0269668	AT-hook motif nuclear-localized protein (AHRD V3.3 *** A0A1U8GD78_CAPAN)	TRUE
Solyc02g079290.3.1	1.57494	0.000321587	0.00314635	FLOWERING LOCUS T/ TERMINAL FLOWER 1-like protein (AHRD V3.3 *** Q6L5N9_POPNI)	TRUE
Solyc08g013750.3.1	1.57322	3.5973e-06	6.36173e-05	F-box protein SKIP19 (AHRD V3.3 *-* SKI19_ARATH)	FALSE
Solyc01g099750.2.1	1.56833	2.51058e-05	0.000346217	Heparan-alpha-glucosaminide N-acetyltransferase-like protein (DUF1624) (AHRD V3.3 *** Q94CC1_ARATH)	FALSE
Solyc12g006530.2.1	1.56763	0.000429389	0.00398771	Terpene cyclase/mutase family member (AHRD V3.3 *** A0A2G3BN05_CAPCH)	FALSE
Solyc07g065880.4.1	1.5583	0.00953169	0.0484561	Kinesin KP1 (AHRD V3.3 *** A0A2G2WFS9_CAPBA)	TRUE
Solyc06g008970.4.1	1.55584	0.00247142	0.0166516	RNA helicase DEAH-box18	FALSE
Solyc02g078780.3.1	1.55561	0.000936333	0.00758842	Protein STRUBBELIG-RECEPTOR FAMILY 3 (AHRD V3.3 *** A0A2G3D5W2_CAPCH)	TRUE
Solyc01g005220.3.1	1.55455	6.87059e-06	0.000113492	MACPF domain-containing protein (AHRD V3.3 *** A0A2G3AYJ5_CAPCH)	FALSE
Solyc10g086250.2.1	1.55344	0.00044442	0.00409198	R2R3MYB transcription factor 75	TRUE
Solyc01g080760.4.1	1.5525	0.00925157	0.0474186	ABC subfamily C protein (AHRD V3.3 *-* AT4G15820.1)	TRUE
Solyc02g091380.1.1	1.55123	6.16879e-05	0.000764244	transmembrane protein (AHRD V3.3 *** AT1G49000.1)	FALSE
Solyc10g009580.4.1	1.5463	0.000186431	0.00199039	Glycosyltransferase (AHRD V3.3 *** A0A2I4F8D3_9ROSI)	FALSE
Solyc05g052980.4.1	1.54127	7.51866e-11	3.90586e-09	Protein phosphatase 2C (AHRD V3.3 *** A0A2U1LBV4_ARTAN)	TRUE
Solyc08g074740.3.1	1.53933	0.00030355	0.00299715	Poly [ADP-ribose] polymerase (AHRD V3.3 *** A0A2G3AGA5_CAPAN)	TRUE
Solyc02g070530.4.1	1.53606	1.39647e-05	0.000209138	Potassium channel KAT1 (AHRD V3.3 *** A0A2G3ANB5_CAPAN)	TRUE
Solyc08g079430.3.1	1.53348	3.95275e-05	0.000517394	partialcopper-containing amine oxidase	FALSE
Solyc01g090560.4.1	1.53282	0.00501689	0.0291697	Ethylene-responsive transcription factor (AHRD V3.3 *** A0A2G3DJ78_CAPCH)	TRUE
Solyc01g080660.3.1	1.53018	1.37182e-05	0.000206241	serine/arginine-rich SC35-like splicing factor SCL28 (AHRD V3.3 *-* A0A2I4G9K3_9ROSI)	TRUE
Solyc02g079320.3.1	1.52751	0.00547417	0.0312802	Unknown protein	FALSE
Solyc06g069430.3.1	1.52573	6.59146e-08	1.80009e-06	FRUITFULL-like MADS-box 1	TRUE
Solyc03g006860.3.1	1.52548	0.00342176	0.0216195	fructokinase	FALSE
Solyc11g006590.2.1	1.51732	0.000739973	0.0062447	Cytochrome (AHRD V3.3 *** A0A1U8G4E5_CAPAN)	FALSE
Solyc12g096210.2.1	1.51534	0.000124285	0.00139428	Unknown protein	FALSE
Solyc03g083400.3.1	1.50784	1.37465e-08	4.37924e-07	CCT motif protein (AHRD V3.3 *** A0A2K3PQC2_TRIPR)	TRUE
Solyc07g053200.4.1	1.50651	0.00677686	0.0371953	Adenine nucleotide alpha hydrolases-like superfamily protein (AHRD V3.3 *** A0A2U1N8C2_ARTAN)	TRUE
Solyc04g005610.3.1	1.50507	8.9468e-05	0.00105142	NAC domain-containing protein 2 (AHRD V3.3 *** NAP2_SOLLC)	TRUE
Solyc06g065330.4.1	1.49801	0.00117713	0.00913845	Receptor-like proteiny region, transmembrane domain-and RING domain-containing protein 2 (AHRD V3.3 *** A0A2G2WKE0_CAPBA)	FALSE
Solyc08g061980.4.1	1.48868	9.61789e-05	0.00112092	Mechanosensitive ion channel protein (AHRD V3.3 *-* A0A1U8DTK7_CAPAN)	TRUE
Solyc08g062220.3.1	1.48773	1.35286e-07	3.48901e-06	Glycosyltransferase (AHRD V3.3 *** A0A218W5V3_PUNGR)	FALSE
Solyc08g076960.1.1	1.48506	0.00136188	0.0102821	Abscisic acid receptor PYL1 (AHRD V3.3 *** A0A2G3DCH7_CAPCH)	TRUE
Solyc11g045110.3.1	1.48275	0.00687508	0.0376062	Sucrose-phosphate synthase family protein (AHRD V3.3 *** A0A2U1M1C4_ARTAN)	TRUE
Solyc06g075360.3.1	1.48031	0.00199016	0.0140077	Tetraspanin-3 (AHRD V3.3 *** A0A1U8H2M6_CAPAN)	FALSE
Solyc10g080610.1.1	1.47897	6.32967e-07	1.36491e-05	F-box/kelch-repeat protein At1g15670-like (AHRD V3.3 *** A0A2I4E0A4_9ROSI)	FALSE
Solyc04g007990.1.1	1.47824	1.05864e-08	3.49427e-07	hypothetical protein (AHRD V3.3 *** AT1G67920.1)	TRUE
Solyc03g098210.4.1	1.47555	0.00171421	0.012408	Cyclic nucleotide gated channel (AHRD V3.3 *** A0A1Y1HP60_KLENI)	TRUE
Solyc03g096670.3.1	1.47507	6.74184e-05	0.000824073	Protein phosphatase 2C (AHRD V3.3 *** A0A2U1LBV4_ARTAN)	TRUE
Solyc07g061800.4.1	1.47194	4.03766e-06	7.07888e-05	Heme-binding-like protein (AHRD V3.3 *** A0A2I0X1C8_9ASPA)	TRUE
Solyc06g062430.3.1	1.47148	0.000275927	0.00277383	Inositol oxygenase (AHRD V3.3 *** A0A2U1PDJ1_ARTAN)	FALSE
Solyc09g082510.3.1	1.47093	3.58066e-05	0.000474807	Kinase interacting (KIP1-like) family protein (AHRD V3.3 *** A0A2K3NUK8_TRIPR)	TRUE
Solyc03g117680.4.1	1.47069	3.87482e-10	1.77581e-08	ATP-dependent DNA helicase (AHRD V3.3 *** Q9ZUI1_ARATH)	TRUE
Solyc07g017610.3.1	1.46927	6.96507e-05	0.00084683	Saccharopine dehydrogenase / Homospermidine synthase (AHRD V3.3 *** A0A200PV89_9MAGN)	FALSE
Solyc08g062860.3.1	1.46518	0.000285334	0.00284649	Mitochondrial carrier protein (AHRD V3.3 *** A0A200Q1U5_9MAGN)	FALSE
Solyc11g018530.2.1	1.46477	0.0049615	0.0289397	root-specific metal transporter	FALSE
Solyc08g077150.3.1	1.46344	0.00550133	0.0313778	Protein phosphatase 2C (AHRD V3.3 *** A0A2U1P5P3_ARTAN)	TRUE
Solyc03g111310.3.1	1.46295	3.75906e-05	0.000494875	Snf1-related protein kinase regulatory subunit gamma-1 (AHRD V3.3 *** A0A1J6IJ95_NICAT)	TRUE
Solyc11g069450.1.1	1.45717	1.95056e-07	4.81999e-06	Senescence regulator S40 (AHRD V3.3 *** A0A200QID2_9MAGN)	TRUE
Solyc01g099810.3.1	1.45438	0.00258704	0.0172715	Serine/arginine-rich-splicing factor SR34 (AHRD V3.3 *-* A0A0M9UMW1_NICAT)	TRUE
Solyc09g090050.4.1	1.45093	3.10207e-09	1.17442e-07	RNA-binding ASCH domain protein (AHRD V3.3 *** AT2G20410.2)	TRUE
Solyc10g006800.4.1	1.45062	0.00099216	0.00794684	Cyclic nucleotide-gated ion channel 4 (AHRD V3.3 *** A0A2G2V344_CAPBA)	TRUE
Solyc04g080130.3.1	1.44828	0.00905833	0.0467251	Zinc finger protein (AHRD V3.3 *-* A0A200QCG2_9MAGN)	TRUE
Solyc03g117840.4.1	1.44556	0.000153143	0.00167767	elongation factor (AHRD V3.3 *** AT5G43150.1)	FALSE
Solyc03g121420.4.1	1.44326	0.000741555	0.00625465	Inorganic pyrophosphatase 1 (AHRD V3.3 *** A0A2G2XXB4_CAPAN)	FALSE
Solyc07g053550.3.1	1.43948	3.86052e-07	8.74763e-06	Glutaredoxin-C9 (AHRD V3.3 *** A0A2G2WE57_CAPBA)	FALSE
Solyc04g064560.4.1	1.43923	0.000122103	0.00137487	Small RNA degrading nuclease 5 (AHRD V3.3 *** A0A1U8GES2_CAPAN)	TRUE
Solyc07g007560.3.1	1.4385	8.35829e-13	6.26392e-11	Phosphate transporter 45 (AHRD V3.3 *** A0A1P8BAK7_ARATH)	FALSE
Solyc02g083380.3.1	1.43822	1.08686e-11	6.51707e-10	Big1 (AHRD V3.3 *-* AT2G17710.1)	FALSE
Solyc04g074870.3.1	1.43267	0.00356102	0.0223309	Purine permease 3 (AHRD V3.3 *** A0A1U8GDH3_CAPAN),Pfam:PF16913	FALSE
Solyc09g011690.4.1	1.43209	5.4511e-12	3.48528e-10	TIP41-like protein (AHRD V3.3 *** Q84JE0_ARATH)	TRUE
Solyc06g005390.1.1	1.42913	0.0095303	0.0484561	Histone H2B (AHRD V3.3 *** A0A1U8GXA4_CAPAN)	TRUE
Solyc08g007080.4.1	1.42805	0.000251864	0.00256293	type I inositol polyphosphate 5-phosphatase 2-like (AHRD V3.3 *** A0A2I4GAB5_9ROSI)	TRUE
Solyc01g086660.2.1	1.42405	6.72241e-05	0.000822798	Unknown protein	FALSE
Solyc09g014450.4.1	1.42294	1.60456e-06	3.11145e-05	Clathrin light chain (AHRD V3.3 *** A0A2G3BKE5_CAPCH)	TRUE
Solyc02g092750.3.1	1.41534	2.07749e-06	3.88833e-05	Protein phosphatase 2C family protein (AHRD V3.3 *** A0A2U1MLG3_ARTAN)	FALSE
Solyc01g106000.4.1	1.41293	9.97966e-11	5.05507e-09	Nicotinamidase 1 (AHRD V3.3 *** A0A1U8DWC4_CAPAN)	FALSE
Solyc06g066330.3.1	1.41266	0.000938059	0.0075967	Poly [ADP-ribose] polymerase (AHRD V3.3 *** A0A200PXE3_9MAGN)	TRUE
Solyc04g074520.1.1	1.41183	0.00244145	0.0165122	VQ motif-containing protein 9 (AHRD V3.3 *** A0A2I4DH74_9ROSI)	TRUE
Solyc01g010060.2.1	1.41156	0.00146505	0.0109168	Unknown protein	FALSE
Solyc07g053130.4.1	1.41033	0.00101007	0.0080656	G-type lectin S-receptor-like serine/threonine-protein kinase (AHRD V3.3 *** A0A2G2Z3R4_CAPAN)	TRUE
Solyc07g042190.3.1	1.40994	8.14837e-13	6.15707e-11	DUF581 domain-containing protein (AHRD V3.3 *** A0A1Q3C7K1_CEPFO)	TRUE
Solyc01g010185.1.1	1.40966	1.7246e-09	6.9616e-08	Retrovirus-related Pol polyprotein from transposon TNT 1-94 (AHRD V3.3 *-* A0A2K3MSD0_TRIPR)	TRUE
Solyc01g107800.4.1	1.40937	9.91529e-05	0.00114972	glucuronoxylan 4-O-methyltransferase 1-like (AHRD V3.3 *** A0A2I4H011_9ROSI)	FALSE
Solyc01g011105.1.1	1.40826	9.10775e-07	1.88398e-05	CLAVATA3/ESR (CLE)-related protein 25-like (AHRD V3.3 *-* A0A2I4EI69_9ROSI)	TRUE
Solyc02g094030.3.1	1.40648	1.17418e-08	3.82728e-07	DSR6 (AHRD V3.3 *** A0A076V4W1_CAPAN)	TRUE
Solyc03g121630.3.1	1.40383	0.00495839	0.0289393	Protein FAR1-RELATED SEQUENCE 4 (AHRD V3.3 *** A0A2G3D0K3_CAPCH)	TRUE
Solyc08g083240.3.1	1.40278	0.00151622	0.0112158	SUN-like protein 24	TRUE
Solyc08g006470.4.1	1.40139	4.88396e-05	0.000624532	Zinc finger protein (AHRD V3.3 *** A0A2U1NTB4_ARTAN)	TRUE
Solyc07g053350.4.1	1.39977	6.16534e-05	0.000764244	Protein trichome birefringence-like 40 (AHRD V3.3 *** A0A1U8FLM2_CAPAN)	FALSE
Solyc08g006330.3.1	1.39968	0.00859539	0.0448176	UDP-xylose phenolic glycosyltransferase	FALSE
Solyc10g085140.2.1	1.39824	1.31669e-07	3.40553e-06	Alkyl transferase (AHRD V3.3 *** K7X479_SOLLC)	FALSE
Solyc11g067200.2.1	1.39765	0.00915038	0.0470672	Protein HIRA (AHRD V3.3 *** A0A2G2VQ12_CAPBA)	TRUE
Solyc08g082670.4.1	1.39648	0.00288585	0.0189007	Cellulose synthase (AHRD V3.3 *** A0A200QCL6_9MAGN)	TRUE
Solyc10g007280.4.1	1.38962	0.00323479	0.020704	P-loop containing nucleoside triphosphate hydrolases superfamily protein (AHRD V3.3 *** A0A2U1NGY3_ARTAN)	TRUE
Solyc01g103970.4.1	1.38821	0.00329337	0.0210127	E3 ubiquitin-protein ligase RNF170-like protein (DUF 1232) (AHRD V3.3 *** Q0WWX8_ARATH)	TRUE
Solyc12g008830.3.1	1.38439	2.32609e-07	5.60407e-06	GATA transcription factor 16 (AHRD V3.3 *** A0A2G2YUT6_CAPAN)	TRUE
Solyc02g084240.3.1	1.38167	5.0165e-17	9.36038e-15	H1 histone-like protein	TRUE
Solyc03g005990.3.1	1.38058	6.80608e-06	0.000112528	BES1/BZR1 (AHRD V3.3 *** A0A2K3PP13_TRIPR)	TRUE
Solyc03g115540.2.1	1.37611	0.00755644	0.0404263	bHLH transcription factor 024	TRUE
Solyc03g121500.3.1	1.37309	0.00728913	0.0392835	Protein FLX-like 3 (AHRD V3.3 *** A0A1U8G3L9_CAPAN)	TRUE
Solyc05g047680.4.1	1.37023	0.000330801	0.00321928	Cytochrome P450 (AHRD V3.3 *** A0A2U1MQN4_ARTAN)	FALSE
Solyc11g007060.2.1	1.36812	0.00832766	0.0436707	40S ribosomal protein S27 (AHRD V3.3 *-* AT5G47940.1)	TRUE
Solyc05g010160.3.1	1.36785	0.00646126	0.0358249	Importin-9 (AHRD V3.3 *** A0A1J3JQN3_NOCCA)	TRUE
Solyc10g083460.1.1	1.36783	0.000458536	0.0042087	Zinc finger A20 and AN1 domain-containing stress-associated protein (AHRD V3.3 *** V5PZR5_9CARY)	FALSE
Solyc07g007370.3.1	1.3666	7.03692e-07	1.50148e-05	Ubiquitin-associated (UBA)/TS-N domain-containing protein (AHRD V3.3 *** A0A2U1MD44_ARTAN)	TRUE
Solyc09g010360.3.1	1.36628	9.56318e-05	0.00111526	WAT1-related protein (AHRD V3.3 *** K4CR63_SOLLC)	TRUE
Solyc08g079420.3.1	1.3658	0.000521255	0.00465348	Cytochrome P450 (AHRD V3.3 *** A0A200QB17_9MAGN)	FALSE
Solyc10g005750.3.1	1.3599	0.00125316	0.00959605	Calcium-dependent protein kinase (AHRD V3.3 *-* B2KTA9_WHEAT)	TRUE
Solyc02g071360.4.1	1.3553	0.00394434	0.0242604	2-oxoglutarate (2OG) and Fe(II)-dependent oxygenase superfamily protein (AHRD V3.3 *** F4I629_ARATH)	FALSE
Solyc05g012210.4.1	1.35484	0.000521766	0.00465416	Ninja-family protein AFP3 (AHRD V3.3 *** A0A2G3CFM6_CAPCH)	TRUE
Solyc08g067050.3.1	1.35446	1.8191e-05	0.000262334	Protein arginine N-methyltransferase (AHRD V3.3 *** A0A200PQK4_9MAGN)	TRUE
Solyc07g032740.4.1	1.3529	5.29845e-11	2.82471e-09	Aspartate aminotransferase (AHRD V3.3 *** A0A0J8BGE0_BETVU)	FALSE
Solyc02g084840.3.1	1.35187	2.14073e-07	5.23333e-06	Dehydrin (AHRD V3.3 *** A0A2R4KWH2_9SOLN)	TRUE
Solyc10g081830.3.1	1.34987	0.00215864	0.0149916	Replication protein A 32 kDa subunit B (AHRD V3.3 *** A0A2G3AVL9_CAPCH)	TRUE
Solyc08g062760.1.1	1.34464	0.00405358	0.0247988	leucine-rich repeat extensin-like protein 1 (AHRD V3.3 --* XP_010094960.2)	TRUE
Solyc05g052640.3.1	1.34142	0.00119705	0.00924501	Peroxisomal nicotinamide adenine dinucleotide carrier (AHRD V3.3 *** A0A1U8GQE9_CAPAN)	TRUE
Solyc01g109790.3.1	1.339	1.35736e-07	3.48901e-06	ADP-glucose pyrophosphorylase large subunit 1	FALSE
Solyc09g010850.4.1	1.33848	0.00175716	0.0126474	Protein kinase APK1B, chloroplastic (AHRD V3.3 *** A0A2G2VY45_CAPBA)	TRUE
Solyc04g081770.4.1	1.33781	0.000105509	0.00121114	GDSL esterase/lipase (AHRD V3.3 *** A0A2G2ZSP1_CAPAN)	FALSE
Solyc05g009950.3.1	1.3321	0.00700873	0.038166	Cytochrome b561 (AHRD V3.3 *** A0A200Q8Q9_9MAGN)	FALSE
Solyc01g107460.2.1	1.33013	1.12621e-07	2.94199e-06	Neuronal PAS domain protein (AHRD V3.3 *** A0A1P8BBZ0_ARATH)	FALSE
Solyc06g008870.2.1	1.32934	0.00130545	0.00992987	Gibberellin receptor (AHRD V3.3 *** E3VJP7_9FABA)	FALSE
Solyc11g070020.3.1	1.32914	0.00499034	0.0290709	rhomboid family protein (AHRD V3.3 *** AT5G11810.1)	TRUE
Solyc07g009130.4.1	1.32884	2.50696e-05	0.000346134	Cadmium/zinc-transporting ATPase HMA2 (AHRD V3.3 *** A0A2G2WC04_CAPBA)	TRUE
Solyc12g096500.2.1	1.32159	2.93486e-21	1.27778e-18	Zinc finger protein CONSTANS-LIKE 4 (AHRD V3.3 *** A0A2G2VJD2_CAPBA)	TRUE
Solyc03g120260.4.1	1.31997	0.00783305	0.0416028	Coatomer subunit beta' (AHRD V3.3 *-* A0A1Q3BXD5_CEPFO)	FALSE
Solyc06g051360.3.1	1.31791	0.00142141	0.0106437	gibberellin 2-beta-dioxygenase 8 (AHRD V3.3 *** A0A2I4EQW7_9ROSI)	TRUE
Solyc05g014260.3.1	1.31688	3.70126e-05	0.000488673	Two-component response regulator (AHRD V3.3 *** A0A2G3B918_CAPCH)	TRUE
Solyc04g080600.3.1	1.31384	0.000559107	0.00493428	Auxilin-like protein 1 (AHRD V3.3 *** A0A2G2V5U3_CAPBA)	TRUE
Solyc09g007150.3.1	1.31302	1.71463e-12	1.21526e-10	Glutathione S-transferase (AHRD V3.3 *** A0A200QHH9_9MAGN)	FALSE
Solyc05g056480.3.1	1.3121	1.50991e-06	2.94981e-05	2-oxoisovalerate dehydrogenase subunit alpha 2, mitochondrial (AHRD V3.3 *** A0A2G2Y480_CAPAN)	TRUE
Solyc04g080080.3.1	1.3113	0.00388657	0.0239615	Glycosyltransferase (AHRD V3.3 *** A0A2G2X173_CAPBA)	TRUE
Solyc08g006320.4.1	1.30808	1.67153e-11	9.67268e-10	WRKY transcription factor 11	TRUE
Solyc04g005250.4.1	1.3073	0.0067673	0.0371833	cytosine-5 DNA methyltransferase1	TRUE
Solyc10g086780.2.1	1.30722	1.97366e-07	4.86392e-06	2-oxoglutarate (2OG) and Fe(II)-dependent oxygenase superfamily protein (AHRD V3.3 *** Q84K82_ARATH)	FALSE
Solyc10g081980.2.1	1.30481	0.000930719	0.00755734	Late embryogenesis abundant (LEA) hydroxyproline-rich glycoprotein family (AHRD V3.3 *** A0A2U1KP17_ARTAN)	FALSE
Solyc11g020670.1.1	1.30104	8.43355e-06	0.000136178	TCP transcription factor 12	TRUE
Solyc02g065300.1.1	1.29541	0.000805372	0.00668499	Leucine--tRNA ligase, cytoplasmic (AHRD V3.3 *** A0A2G3D329_CAPCH)	TRUE
Solyc02g078130.3.1	1.29391	0.00591738	0.0332734	bHLH transcription factor 079	TRUE
Solyc08g006110.4.1	1.29146	9.7548e-07	1.99973e-05	Basic leucine zipper 9-like transcription factor (AHRD V3.3 *** A0A2K3PFC6_TRIPR)	TRUE
Solyc04g007980.3.1	1.28219	7.62137e-07	1.61676e-05	2-oxoglutarate (2OG) and Fe(II)-dependent oxygenase superfamily protein (AHRD V3.3 *** O80850_ARATH)	TRUE
Solyc02g081650.3.1	1.28032	0.000714749	0.00607055	Enhancer of polycomb-like protein (AHRD V3.3 *** A0A1U8FX19_CAPAN)	TRUE
Solyc09g091760.3.1	1.27958	0.00967155	0.0489646	bHLH transcription factor 151	TRUE
Solyc07g007250.4.1	1.27864	0.00251407	0.0168829	Metallocarboxypeptidase inhibitor (AHRD V3.3 *** A0A2G3BXM1_CAPCH)	FALSE
Solyc11g065600.2.1	1.27761	0.000545363	0.00481763	xyloglucan endotransglucosylase-hydrolase 4	FALSE
Solyc08g006970.4.1	1.27739	0.00401096	0.0245957	Plant intracellular Ras-group-related LRR protein (AHRD V3.3 *** A0A2R6PDI6_ACTCH)	FALSE
Solyc09g009880.3.1	1.27241	5.89827e-08	1.63171e-06	F-box-like domain-containing protein (AHRD V3.3 *** A0A1Q3BFU9_CEPFO)	TRUE
Solyc05g011890.1.1	1.26999	3.9368e-08	1.11957e-06	Sulfotransferase (AHRD V3.3 *** A0A2G3B6Y2_CAPCH)	TRUE
Solyc06g073960.4.1	1.26143	8.57513e-05	0.00101361	Serine/threonine-protein phosphatase (AHRD V3.3 *** I6WZC5_SOLTU)	TRUE
Solyc08g076970.3.1	1.25946	2.37177e-05	0.000329886	Acetylornithine deacetylase (AHRD V3.3 *** A0A2G2XLB1_CAPBA)	FALSE
Solyc10g079990.3.1	1.25853	1.51125e-05	0.000224307	Transcription initiation factor IIB (AHRD V3.3 *** A0A2G3BH71_CAPCH)	FALSE
Solyc02g077720.4.1	1.25825	3.46756e-10	1.60934e-08	Unknown protein	TRUE
Solyc07g053610.3.1	1.25648	8.47027e-05	0.00100251	Homeobox domain-containing protein/DDT domain-containing protein (AHRD V3.3 *** A0A1Q3C1K9_CEPFO)	TRUE
Solyc04g079210.3.1	1.25635	2.66334e-10	1.27454e-08	Patatin (AHRD V3.3 *** A0A2G2X0P8_CAPBA)	TRUE
Solyc07g062970.3.1	1.25591	2.76212e-08	8.14646e-07	protein phosphatase 2C	TRUE
Solyc11g005570.2.1	1.25502	0.00230064	0.0157534	axoneme-associated protein MST101(2) protein (AHRD V3.3 *** AT2G44820.1)	TRUE
Solyc10g009280.4.1	1.2536	3.55064e-08	1.02247e-06	GRF1-interacting factor 2 (AHRD V3.3 *** A0A2G3BDJ8_CAPCH)	TRUE
Solyc06g084020.4.1	1.25228	2.88122e-19	7.74794e-17	histone H1	TRUE
Solyc12g005340.3.1	1.25066	2.2914e-05	0.00032019	Transcription factor GRAS (AHRD V3.3 *** A0A200QMI2_9MAGN)	TRUE
Solyc11g008730.2.1	1.24703	0.00949192	0.048348	U11/U12 small nuclear ribonucleoprotein 25 kDa protein (AHRD V3.3 *** A0A2G2VEB7_CAPBA)	TRUE
Solyc07g043230.3.1	1.24367	0.00136967	0.0103196	Zinc transporter protein (AHRD V3.3 *** A5BDR3_VITVI)	FALSE
Solyc11g010810.1.1	1.2427	0.000176134	0.00189681	UDP-glycosyltransferase 91A1 (AHRD V3.3 *** A0A2G2Y5N3_CAPAN)	FALSE
Solyc01g095620.3.1	1.24188	1.88646e-12	1.32676e-10	Glycosyltransferase (AHRD V3.3 *** A0A2U1KKS2_ARTAN)	FALSE
Solyc01g005000.3.1	1.2414	2.00708e-09	7.90982e-08	Glutamate decarboxylase (AHRD V3.3 *** B1Q3F2_SOLLC)	FALSE
Solyc10g083360.2.1	1.23904	1.15888e-16	2.05741e-14	Calmodulin-binding family protein, putative, expressed (AHRD V3.3 *** Q2QXN6_ORYSJ)	TRUE
Solyc08g083260.3.1	1.23282	0.000134384	0.0014902	Snurportin-1 (AHRD V3.3 *** A0A1J3IQI3_NOCCA)	TRUE
Solyc12g062690.2.1	1.23108	0.00462023	0.0273948	Unknown protein	TRUE
Solyc11g069050.2.1	1.23073	0.000189889	0.00201527	4-coumarate--CoA ligase-like 7 (AHRD V3.3 *** A0A1U8ELY2_CAPAN)	FALSE
Solyc01g080870.3.1	1.22648	9.21142e-05	0.00107629	Protein NRT1/ PTR FAMILY 7.3 (AHRD V3.3 *** A0A2G3DJ73_CAPCH)	FALSE
Solyc01g098590.3.1	1.22611	5.39228e-05	0.000681904	Phosphoglycerate mutase-like protein AT74 (AHRD V3.3 *** A0A2G2YZL9_CAPAN)	FALSE
Solyc09g092480.1.1	1.22564	2.56772e-05	0.000353432	Glycosyltransferase (AHRD V3.3 *** A0A2I4GJH4_9ROSI)	FALSE
Solyc07g043260.4.1	1.22531	0.00235025	0.0160122	protein FAR1-RELATED SEQUENCE 2-like isoform X1 (AHRD V3.3 *** A0A2I4HFL5_9ROSI)	TRUE
Solyc03g111710.3.1	1.225	0.000289942	0.00288303	BTB/POZ and TAZ domain-containing protein 2 (AHRD V3.3 *** A0A2G2X8F9_CAPBA)	TRUE
Solyc07g063850.3.1	1.22311	5.21709e-05	0.00066158	IAA-amido synthetase 3-9	TRUE
Solyc03g116670.3.1	1.22209	1.1262e-06	2.26554e-05	Tetratricopeptide repeat (TPR)-like superfamily protein (AHRD V3.3 *-* F4K464_ARATH)	TRUE
Solyc11g069600.2.1	1.21986	0.00296689	0.0192953	Zinc finger C3HC4 type (RING finger) protein (AHRD V3.3 *** A0A2K3NPY3_TRIPR)	TRUE
Solyc05g011810.4.1	1.21654	0.0017367	0.0125424	bHLH transcription factor 040	TRUE
Solyc06g082370.4.1	1.21593	9.21914e-06	0.000146465	28S ribosomal protein S29, mitochondrial-like (AHRD V3.3 *** A0A2I4F9V5_9ROSI)	TRUE
Solyc03g083420.4.1	1.21552	9.72139e-05	0.00113154	OBP3-responsive protein 1 (AHRD V3.3 *** AT5G53450.1)	TRUE
Solyc11g013110.2.1	1.21075	1.9652e-21	8.9839e-19	2-oxoglutarate (2OG) and Fe(II)-dependent oxygenase superfamily protein (AHRD V3.3 *** AT1G49390.1)	FALSE
Solyc03g097670.4.1	1.20984	8.09522e-07	1.69953e-05	DNA binding,ATP binding protein (AHRD V3.3 *** A0A2U1MGM2_ARTAN)	TRUE
Solyc08g077730.3.1	1.20886	0.0095832	0.0486233	phosphatidylinositol 4-phosphate 5-kinase 4-like (AHRD V3.3 *** A0A2I4G100_9ROSI)	TRUE
Solyc01g010020.3.1	1.2051	0.000290548	0.00288591	Calmodulin (AHRD V3.3 *** B6SJJ2_MAIZE)	FALSE
Solyc01g096900.3.1	1.20489	0.00884702	0.045834	DNA gyrase subunit A (AHRD V3.3 *** A0A2U1Q6G1_ARTAN)	TRUE
Solyc09g014440.4.1	1.20408	4.20031e-06	7.32192e-05	RNA polymerase II C-terminal domain phosphatase-like 2 (AHRD V3.3 *** A0A2G2YRP1_CAPAN)	TRUE
Solyc10g085030.1.1	1.20407	1.01642e-12	7.52483e-11	Heme-binding-like protein (AHRD V3.3 *** A0A2I0X8X3_9ASPA)	FALSE
Solyc06g005970.2.1	1.20147	0.00168494	0.0122313	Glycosyl hydrolase family protein (AHRD V3.3 *** A0A2U1PL05_ARTAN)	FALSE
Solyc12g094450.3.1	1.20079	7.89084e-12	4.90789e-10	Enoyl-CoA hydratase 2, peroxisomal (AHRD V3.3 *** A0A2G2V0C5_CAPBA)	FALSE
Solyc03g113390.3.1	1.20071	0.000856383	0.0070318	Calcium-dependent protein kinase (AHRD V3.3 *** E5GBE9_CUCME)	TRUE
Solyc02g092480.4.1	1.19824	6.17938e-05	0.000765038	BTB domain-containing protein/NPH3 domain-containing protein (AHRD V3.3 *** A0A1Q3ASI0_CEPFO)	TRUE
Solyc06g050800.4.1	1.1962	0.0086886	0.0452134	Amino acid transporter (AHRD V3.3 *** S8C1J4_9LAMI)	FALSE
Solyc07g064290.3.1	1.19504	0.000218008	0.00226478	Ras-related small GTP-binding family protein (AHRD V3.3 *** A0A2U1P8S6_ARTAN)	FALSE
Solyc11g066270.3.1	1.19393	0.00827418	0.0434525	xyloglucan endotransglucosylase-hydrolase 6	FALSE
Solyc07g053710.3.1	1.1938	2.29073e-06	4.2397e-05	Tyrosine aminotransferase (AHRD V3.3 *** A0A2G2V8D6_CAPBA)	FALSE
Solyc10g077130.1.1	1.19366	1.77162e-07	4.41441e-06	calmodulin-binding protein 25-like (AHRD V3.3 *** A0A2I4GIE5_9ROSI)	TRUE
Solyc10g054840.2.1	1.1885	1.97446e-08	6.01749e-07	X-intrinsic protein 1.1	FALSE
Solyc11g010670.1.1	1.18829	0.00699641	0.0381227	Unknown protein	FALSE
Solyc06g071770.4.1	1.18699	0.000213421	0.00222625	PB1 domain, Zinc finger, ZZ-type, UBA-like, Next to BRCA1, central domain protein (AHRD V3.3 *-* A0A2U1P8J3_ARTAN)	TRUE
Solyc01g105410.4.1	1.18625	7.96687e-10	3.44402e-08	Protein EXORDIUM-like 2 (AHRD V3.3 *** B1Q489_CAPCH)	FALSE
Solyc01g101130.3.1	1.18506	2.08691e-05	0.000295824	Myosin heavy chain, cardiac protein (AHRD V3.3 *** A0A2P5D8H8_PARAD)	TRUE
Solyc05g005980.4.1	1.18478	3.16517e-05	0.000425576	protein NRT1/ PTR FAMILY 1.2-like (AHRD V3.3 *** A0A2I4HMB7_9ROSI)	FALSE
Solyc03g044910.1.1	1.18448	0.00585833	0.0329617	Elongation of fatty acids protein 3-like (AHRD V3.3 *** A0A1U8GG41_CAPAN)	FALSE
Solyc10g054100.3.1	1.18423	1.0433e-07	2.7332e-06	Protein DETOXIFICATION (AHRD V3.3 *** S8CW50_9LAMI)	FALSE
Solyc04g007340.4.1	1.18423	0.00931488	0.0476458	hypothetical protein (DUF1639) (AHRD V3.3 *** AT1G25370.2)	TRUE
Solyc09g065850.4.1	1.18182	1.11279e-12	8.17207e-11	auxin-regulated IAA3	TRUE
Solyc03g118620.3.1	1.17927	0.000451481	0.00415281	Outer arm dynein light chain 1 protein (AHRD V3.3 *-* A0A2U1P5K0_ARTAN)	TRUE
Solyc11g072627.1.1	1.17893	0.00232436	0.0158831	Early nodulin-like protein 3 (AHRD V3.3 *-* A0A2G3AND2_CAPAN)	FALSE
Solyc01g080500.2.1	1.1758	2.99214e-11	1.67835e-09	Plant/F10N7-170 protein, putative (AHRD V3.3 *** G7IFN2_MEDTR)	TRUE
Solyc03g080020.4.1	1.1745	0.00821415	0.0432117	Major facilitator superfamily domain, general substrate transporter (AHRD V3.3 *-* A0A0A2K2T0_PENEN)	FALSE
Solyc07g017510.3.1	1.17238	0.00024395	0.0024921	1-phosphatidylinositol-3-phosphate 5-kinase FAB1B (AHRD V3.3 *** A0A2G2WC08_CAPBA)	TRUE
Solyc04g005450.3.1	1.17097	0.00424552	0.025715	Purple acid phosphatase (AHRD V3.3 *** A0A2G3CFK1_CAPCH)	FALSE
Solyc10g005630.3.1	1.17064	1.92148e-07	4.75458e-06	Protein kinase superfamily protein (AHRD V3.3 *** A0A2U1KM25_ARTAN)	FALSE
Solyc07g055810.3.1	1.16972	9.90895e-08	2.61088e-06	LRR_1 domain-containing protein/Pkinase_Tyr domain-containing protein/Malectin domain-containing protein/LRR_8 domain-containing protein (AHRD V3.3 *** A0A1Q3C610_CEPFO)	FALSE
Solyc01g107100.3.1	1.16857	4.53443e-05	0.000585017	beta-1%2C4-xylosidase (AHRD V3.3 *** AT3G19615.1)	TRUE
Solyc09g009210.4.1	1.16741	1.12515e-14	1.31048e-12	Transcriptional activator (DUF662) (AHRD V3.3 *** Q3EBM1_ARATH)	TRUE
Solyc08g077530.3.1	1.16702	2.62838e-08	7.76455e-07	Beta-amylase (AHRD V3.3 *** Q94EU9_SOLTU)	TRUE
Solyc06g073110.3.1	1.16604	0.00493425	0.0288268	mRNA, clone: RTFL01-36-E19 (AHRD V3.3 *** E4MXZ6_EUTHA)	TRUE
Solyc01g060070.3.1	1.16487	0.000194893	0.00205882	Outer envelope pore protein 16-2, chloroplastic (AHRD V3.3 *** A0A2G2XR36_CAPBA),Pfam:PF02466	TRUE
Solyc03g034050.3.1	1.16279	6.50943e-06	0.000108407	MIP18 family protein (AHRD V3.3 *** A0A2G3CL79_CAPCH)	TRUE
Solyc08g075280.4.1	1.16169	5.67216e-05	0.000710905	AT4g19390/T5K18_170 (AHRD V3.3 *-* Q94JM4_ARATH)	FALSE
Solyc11g068950.3.1	1.1609	0.000346391	0.00335493	BEL1-like homeodomain protein 1 (AHRD V3.3 *** A0A2G2YH01_CAPAN)	TRUE
Solyc09g082230.1.1	1.15894	3.04359e-05	0.000411346	N-acetyltransferase (AHRD V3.3 *** A0A2N9Z4V7_PAEPO)	FALSE
Solyc11g066740.2.1	1.15849	7.99669e-05	0.000955111	protein RETICULATA, chloroplastic-like (AHRD V3.3 *** A0A2I4ELL8_9ROSI)	TRUE
Solyc01g007070.3.1	1.15735	0.000216259	0.002252	BEL1-like homeodomain protein 3 (AHRD V3.3 *** A0A2G3AY56_CAPCH)	TRUE
Solyc01g005420.2.1	1.15715	4.73621e-07	1.05747e-05	C2 calcium-dependent membrane targeting (AHRD V3.3 *-* A0A2U1LLL4_ARTAN)	FALSE
Solyc12g044940.2.1	1.15694	4.08974e-06	7.14961e-05	NAD(P)-binding Rossmann-fold superfamily protein (AHRD V3.3 *** Q94AL3_ARATH)	FALSE
Solyc08g079600.3.1	1.15401	2.56274e-07	6.1178e-06	hypothetical protein (AHRD V3.3 *-* AT2G27830.1)	TRUE
Solyc07g007870.3.1	1.15333	1.66315e-07	4.1718e-06	12-oxophytodienoate reductase 3	FALSE
Solyc01g094410.3.1	1.15287	2.14486e-07	5.23643e-06	C2 calcium/lipid-binding plant phosphoribosyltransferase family protein (AHRD V3.3 *** A0A061G6B5_THECC)	TRUE
Solyc02g069400.3.1	1.14988	0.00113865	0.008898	Alpha/Beta hydrolase fold protein (AHRD V3.3 *** A0A2U1NSZ5_ARTAN)	FALSE
Solyc11g007580.3.1	1.14965	0.00140772	0.0105585	DNA demethylase 3	TRUE
Solyc04g009440.3.1	1.14808	0.000963942	0.00776504	NAC domain protein AY498713	TRUE
Solyc01g105820.3.1	1.14706	0.00971214	0.0491276	Unknown protein	TRUE
Solyc02g032850.3.1	1.14518	1.36801e-05	0.000205888	Phytoalexin-deficient 4-1 protein (AHRD V3.3 *** Q2TNK3_SOLTU)	FALSE
Solyc06g073940.4.1	1.14414	0.000168226	0.00182022	protein FAF-like, chloroplastic (AHRD V3.3 *-* A0A2I4H6U5_9ROSI)	TRUE
Solyc07g043310.3.1	1.14192	6.45657e-08	1.76744e-06	Gamma aminobutyrate transaminase isoform 1	FALSE
Solyc09g007390.3.1	1.14095	0.00293049	0.0190904	Mitochondrial import inner membrane translocase subunit TIM14 (AHRD V3.3 *** A0A2G2YLL8_CAPAN)	TRUE
Solyc05g007240.1.1	1.13984	0.000248371	0.00253161	zinc finger CCHC domain protein (AHRD V3.3 *** AT1G26920.1)	TRUE
Solyc01g110380.3.1	1.13977	0.00364176	0.0227436	Kinesin-like protein (AHRD V3.3 *** A0A2G2XNI5_CAPBA)	TRUE
Solyc08g062970.1.1	1.13882	5.92248e-07	1.28773e-05	Glutaredoxin (AHRD V3.3 *** A0A118JSL8_CYNCS)	FALSE
Solyc09g090060.3.1	1.13879	9.02857e-06	0.000144063	Serine/threonine-protein phosphatase (AHRD V3.3 *** A0A2G2W1C4_CAPBA)	FALSE
Solyc10g011660.3.1	1.13707	4.58176e-05	0.00059043	Auxin-responsive GH3 family protein (AHRD V3.3 *** A0A2U1NZC8_ARTAN)	FALSE
Solyc09g072710.4.1	1.13696	0.000812819	0.00673763	Phospholipid--sterol O-acyltransferase (AHRD V3.3 *** A0A2G2ZWL8_CAPAN)	TRUE
Solyc01g094580.3.1	1.13521	0.00208109	0.0145359	Beta-amylase (AHRD V3.3 *** A0A2G2W5P7_CAPBA)	TRUE
Solyc01g100240.3.1	1.13431	3.3799e-05	0.00045179	Calmodulin binding protein-like (AHRD V3.3 *** A0A200R2D8_9MAGN)	TRUE
Solyc01g103170.4.1	1.13261	0.000432338	0.0040109	Lysine ketoglutarate reductase trans-splicing-like protein, putative (DUF707) (AHRD V3.3 *** F4JRK4_ARATH)	TRUE
Solyc10g078530.2.1	1.13209	5.05233e-08	1.41915e-06	Patatin (AHRD V3.3 *** A0A2G3BI67_CAPCH)	TRUE
Solyc01g079680.3.1	1.13181	1.451e-09	5.94912e-08	RAN GTPase-activating protein 1 (AHRD V3.3 *** A0A1U8DZ62_CAPAN)	TRUE
Solyc08g068780.3.1	1.12949	7.6262e-05	0.000916246	N-hydroxycinnamoyl-CoA:tyramine N-hydroxycinnamoyl transferase THT7-8	FALSE
Solyc06g068460.3.1	1.12895	4.66203e-07	1.04217e-05	WRKY transcription factor 40	TRUE
Solyc03g059270.4.1	1.1276	0.00861836	0.0449117	Zinc finger protein (AHRD V3.3 *** A0A200QA40_9MAGN)	TRUE
Solyc07g008160.3.1	1.12592	0.00855293	0.0446344	nuclear pore complex protein NUP155 (AHRD V3.3 *** A0A2I4FD09_9ROSI)	TRUE
Solyc02g063440.3.1	1.12583	2.50481e-05	0.000346134	Unknown protein	FALSE
Solyc04g040180.3.1	1.12543	0.00141894	0.0106339	S-adenosyl-L-methionine-dependent methyltransferases superfamily protein (AHRD V3.3 *** A0A1Y1ICE6_KLENI)	FALSE
Solyc10g086240.2.1	1.12506	6.69649e-08	1.8222e-06	Glycosyltransferase (AHRD V3.3 *** A0A1Q3DDP0_CEPFO)	FALSE
Solyc01g107690.4.1	1.12469	0.00693768	0.037848	Unknown protein	FALSE
Solyc06g065445.1.1	1.12322	5.46255e-06	9.22146e-05	Protein SENSITIVE TO PROTON RHIZOTOXICITY 1 (AHRD V3.3 *-* A0A2G3C818_CAPCH)	FALSE
Solyc04g071050.4.1	1.12207	2.55385e-06	4.66997e-05	RNA-binding protein 2-like (AHRD V3.3 *** A0A2I4GWB3_9ROSI)	TRUE
Solyc08g008420.3.1	1.12075	8.90416e-06	0.000142327	Mitochondrial pyruvate carrier (AHRD V3.3 *** A0A1U8GCA8_CAPAN)	FALSE
Solyc12g008420.3.1	1.11886	0.00104751	0.00829572	RNA-dependent RNA polymerase (AHRD V3.3 *** A0A328CYP7_9ASTE)	FALSE
Solyc02g089660.2.1	1.11804	5.06109e-07	1.12315e-05	hypothetical protein (AHRD V3.3 *** AT3G19660.1)	FALSE
Solyc12g049310.2.1	1.11449	7.57064e-12	4.74099e-10	Ubiquitin-like protein ATG12 (AHRD V3.3 *** A0A2G3B3P3_CAPCH)	FALSE
Solyc07g014680.4.1	1.11409	3.26381e-05	0.000438195	Potassium transporter (AHRD V3.3 *-* A0MNZ1_EUTHA)	FALSE
Solyc04g005480.1.1	1.11351	2.3097e-05	0.000322406	nodulin-related protein 1-like (AHRD V3.3 *** A0A2I4FXG1_9ROSI)	TRUE
Solyc02g068900.3.1	1.11182	5.05038e-06	8.65523e-05	Glutathione S-transferase (AHRD V3.3 *** A0A200QN08_9MAGN)	FALSE
Solyc07g007170.3.1	1.11055	3.80965e-08	1.09019e-06	RING/U-box superfamily protein (AHRD V3.3 *** AT2G15580.2)	TRUE
Solyc01g100050.3.1	1.10975	2.75488e-07	6.53382e-06	TOPLESS 3	TRUE
Solyc03g081330.1.1	1.10922	0.00831404	0.0436243	Avr9/Cf-9 rapidly elicited protein (AHRD V3.3 -** AT5G54165.1)	TRUE
Solyc09g007640.4.1	1.10894	0.00958302	0.0486233	Serine carboxypeptidase-like 50 (AHRD V3.3 *** A0A2G2YQA0_CAPAN)	FALSE
Solyc06g073610.3.1	1.10439	0.00206929	0.0144755	cyclin B1	TRUE
Solyc02g067860.4.1	1.10332	7.38368e-07	1.5718e-05	Glucose-6-phosphate 1-epimerase (AHRD V3.3 *** A0A1U8FRS7_CAPAN)	FALSE
Solyc08g065610.3.1	1.10211	4.96458e-05	0.000633512	Vacuolar-processing enzyme (AHRD V3.3 *** A0A2G2VI36_CAPBA)	TRUE
Solyc05g042050.4.1	1.09933	0.00675744	0.0371569	Drug/metabolite transporter (AHRD V3.3 *-* A0A200RBC1_9MAGN)	FALSE
Solyc10g008500.4.1	1.09924	1.04301e-06	2.11553e-05	Peroxisomal membrane 22 kDa (Mpv17/PMP22) family protein (AHRD V3.3 *** A0A2U1PNL3_ARTAN)	TRUE
Solyc05g055830.3.1	1.09884	0.00278401	0.0183804	R3H domain containing protein (AHRD V3.3 *** B4FB44_MAIZE)	TRUE
Solyc12g098370.2.1	1.09783	1.24778e-05	0.000189352	Myb family transcription factor APL (AHRD V3.3 *** A0A1U8F7R6_CAPAN)	TRUE
Solyc11g010850.2.1	1.09778	1.48252e-06	2.9025e-05	1-deoxy-d-xylulose-5-phosphate synthase 1 (AHRD V3.3 *** A0A2U1PQH9_ARTAN)	TRUE
Solyc10g074740.2.1	1.09669	3.29315e-06	5.86925e-05	Calcium-binding protein CAST (AHRD V3.3 *** A0A1U8EHD5_CAPAN)	FALSE
Solyc06g074960.4.1	1.09369	0.00842613	0.0440607	Dolichol kinase (AHRD V3.3 *** A0A1J3I6T5_NOCCA)	FALSE
Solyc09g005860.3.1	1.09291	0.00159685	0.0117269	Ankyrin repeat-containing protein (AHRD V3.3 *** A0A2G3BJS8_CAPCH)	FALSE
Solyc04g012040.3.1	1.09291	0.000326373	0.00318636	26S proteasome non-ATPase regulatory subunit 12-like protein (AHRD V3.3 *** A0A2K3MWS1_TRIPR)	TRUE
Solyc12g096900.2.1	1.09065	1.12336e-08	3.68793e-07	Disease resistance protein (TIR-NBS-LRR class) family (AHRD V3.3 *-* A0A2U1LJH5_ARTAN)	FALSE
Solyc01g100200.3.1	1.09026	0.00252158	0.0169271	gras4	TRUE
Solyc02g084950.3.1	1.08764	0.000254703	0.0025875	S-adenosyl-L-methionine-dependent methyltransferases superfamily protein (AHRD V3.3 *** A0A2U1KPI6_ARTAN)	FALSE
Solyc04g074580.1.1	1.08729	1.07908e-19	3.46176e-17	Histone H3 (AHRD V3.3 *** A0A2K1J132_PHYPA)	TRUE
Solyc12g089220.3.1	1.08717	0.000393123	0.0037363	Bifunctional nuclease 2 (AHRD V3.3 *** A0A2G2Y9Z2_CAPAN)	FALSE
Solyc04g051670.3.1	1.08574	0.00505192	0.0293454	RNA cytidine acetyltransferase (AHRD V3.3 *** A0A2G2Y7A9_CAPAN)	TRUE
Solyc02g089990.1.1	1.08458	0.00115288	0.00897466	HTH-type transcriptional regulator (AHRD V3.3 *** A0A2P5FXV7_TREOI)	TRUE
Solyc02g071780.3.1	1.08455	5.46651e-06	9.22146e-05	MACPF domain-containing protein (AHRD V3.3 *** A0A1Q3CKD2_CEPFO)	TRUE
Solyc09g074270.3.1	1.08441	0.00260523	0.0173486	Gibberellin receptor (AHRD V3.3 *** E3VJP7_9FABA)	FALSE
Solyc01g096810.3.1	1.08405	1.1078e-05	0.000171237	EIL3	TRUE
Solyc10g079830.3.1	1.08391	5.9391e-07	1.28982e-05	7,8-dihydroneopterin aldolase (AHRD V3.3 *** Q6TFM2_SOLLC)	FALSE
Solyc03g032150.3.1	1.08366	6.6429e-05	0.000814155	Protein kinase domain (AHRD V3.3 *-* A0A200PQX9_9MAGN)	TRUE
Solyc01g103010.4.1	1.08278	0.00218593	0.0151466	Cullin-associated NEDD8-dissociated protein 1 (AHRD V3.3 *** A0A2G2W8I3_CAPBA)	TRUE
Solyc11g065030.3.1	1.08273	0.00832539	0.0436707	GDP-mannose transporter (AHRD V3.3 *** A0A1B0VP09_ARATH)	FALSE
Solyc09g092430.3.1	1.08229	3.69978e-10	1.70413e-08	Selenium-binding protein (AHRD V3.3 *** A0A200Q5C9_9MAGN)	FALSE
Solyc01g111980.3.1	1.0817	1.03462e-06	2.10445e-05	Lysine histidine transporter-like 8 (AHRD V3.3 *** A0A2G2XYM3_CAPAN)	TRUE
Solyc07g063820.3.1	1.08149	0.000420309	0.00393134	G-type lectin S-receptor-like serine/threonine-protein kinase (AHRD V3.3 *** A0A2G2Z5Q1_CAPAN)	TRUE
Solyc01g079670.2.1	1.08111	0.0039082	0.0240543	Cotton fiber protein (AHRD V3.3 *** Q570M0_ARATH)	TRUE
Solyc01g102990.3.1	1.08016	0.00212328	0.014791	ATP-dependent Clp protease ATP-binding subunit ClpX (AHRD V3.3 *** A0A2G2Y1Q3_CAPAN)	TRUE
Solyc07g008040.4.1	1.07972	0.00122533	0.0094105	TOPLESS 5	TRUE
Solyc11g012290.2.1	1.07921	0.00134744	0.0101773	SWIB domain-containing protein (AHRD V3.3 *-* A0A1Q3D4Q9_CEPFO)	TRUE
Solyc08g063040.4.1	1.07696	3.18322e-12	2.11667e-10	Zinc-finger protein	TRUE
Solyc03g112210.1.1	1.07618	1.14062e-05	0.000175419	Unknown protein	TRUE
Solyc10g047320.2.1	1.07534	0.00652028	0.0360974	Disease resistance protein (AHRD V3.3 *** A0A2U1N8H9_ARTAN)	FALSE
Solyc08g008170.4.1	1.07519	0.00177377	0.0127347	Calcium-dependent protein kinase (AHRD V3.3 *** B2KTA5_WHEAT)	TRUE
Solyc05g007880.4.1	1.07499	1.73631e-08	5.35415e-07	cyclic dof factor 2-like (AHRD V3.3 *** A0A2I4E3P6_9ROSI)	TRUE
Solyc08g023645.1.1	1.07456	0.00443518	0.0264779	Unknown protein	FALSE
Solyc01g109170.3.1	1.07376	3.27285e-05	0.000439086	Cold-regulated plasma membrane protein 2 (AHRD V3.3 *** A0A1U8E7A7_CAPAN)	FALSE
Solyc05g053550.3.1	1.07355	1.7683e-27	2.15568e-24	chalcone synthase 2	FALSE
Solyc01g087250.3.1	1.07242	2.05544e-07	5.0383e-06	carotenoid cleavage dioxygenase 1A	FALSE
Solyc02g092930.1.1	1.07033	0.000111116	0.00126439	R2R3MYB transcription factor 44	TRUE
Solyc01g005930.3.1	1.06617	0.000166017	0.00179952	Lipase/lipooxygenase%2C PLAT/LH2 family protein (AHRD V3.3 *** AT1G55280.2)	TRUE
Solyc08g079770.3.1	1.06609	0.00335879	0.0213112	Guard cell S-type anion channel SLAC1 (AHRD V3.3 *** A0A2G2XKK1_CAPBA)	TRUE
Solyc12g020050.2.1	1.06587	0.00041516	0.00389313	DNA-binding protein DQ117941	TRUE
Solyc07g018010.3.1	1.06487	3.0996e-08	9.03977e-07	bHLH transcription factor139	TRUE
Solyc08g076730.4.1	1.06353	1.65005e-05	0.000241382	Tetratricopeptide repeat (TPR)-like superfamily protein (AHRD V3.3 *-* Q0WUZ1_ARATH)	TRUE
Solyc06g060230.3.1	1.06102	2.98086e-13	2.47763e-11	NAC domain-containing protein (AHRD V3.3 *** A0A2K3N804_TRIPR)	TRUE
Solyc01g099840.3.1	1.05739	2.63758e-15	3.5205e-13	Dormancy/auxin associated protein (AHRD V3.3 *** A0A2K3MXX9_TRIPR)	TRUE
Solyc09g091030.3.1	1.05622	1.25277e-05	0.000189952	Beta-amylase (AHRD V3.3 *** Q1L5W8_NICLS)	TRUE
Solyc01g107980.3.1	1.05313	0.00128019	0.00975397	RING-type E3 ubiquitin transferase (AHRD V3.3 *** A0A2G2W990_CAPBA)	FALSE
Solyc11g073020.3.1	1.05229	0.00439151	0.0263052	Heavy metal transport/detoxification superfamily protein (AHRD V3.3 *** B6T8A4_MAIZE)	TRUE
Solyc05g017890.4.1	1.05189	0.000104971	0.00120571	THO complex subunit 2 (AHRD V3.3 *** A0A2G3ACB5_CAPAN)	TRUE
Solyc04g051680.4.1	1.05163	0.00139129	0.0104558	Ras GTPase (AHRD V3.3 *** K2SFN1_MACPH)	FALSE
Solyc05g014200.3.1	1.05129	0.00086636	0.00711053	TGN-localized SYP41-interacting protein (AHRD V3.3 *** F1BCU1_ARATH)	TRUE
Solyc08g008370.3.1	1.05007	1.86799e-07	4.63473e-06	DCD (Development and Cell Death) domain protein (AHRD V3.3 *-* A0A2U1P2J5_ARTAN)	TRUE
Solyc07g017675.1.1	1.0498	0.00363522	0.0227252	Lysine-ketoglutarate reductase/saccharopine dehydrogenase bifunctional enzyme (AHRD V3.3 *-* A0A2U1NQS7_ARTAN)	FALSE
Solyc12g013920.2.1	1.04959	6.10398e-08	1.68352e-06	Protein yippee-like (AHRD V3.3 *** A0A1U8EEB0_CAPAN)	FALSE
Solyc01g088760.4.1	1.04883	0.0013906	0.0104558	Cytochrome P450 (AHRD V3.3 *** A0A200RC30_9MAGN)	TRUE
Solyc02g071210.3.1	1.04826	8.58759e-10	3.69488e-08	Cold-regulated inner membrane protein 2, chloroplastic (AHRD V3.3 *** A0A2G3D4Q0_CAPCH)	FALSE
Solyc07g041750.3.1	1.04804	2.18142e-07	5.29741e-06	O-fucosyltransferase family protein (AHRD V3.3 *** A0A2U1LL12_ARTAN)	TRUE
Solyc09g014320.4.1	1.04755	5.44666e-05	0.000687828	AdoMet-dependent rRNA methyltransferase SPB1 (AHRD V3.3 *-* M3BBZ0_PSEFD)	FALSE
Solyc10g005480.3.1	1.04443	5.31232e-07	1.16897e-05	F-box family protein (AHRD V3.3 *** A0A2U1N101_ARTAN)	TRUE
Solyc02g070210.3.1	1.04162	0.00273513	0.0181278	Patellin-4 (AHRD V3.3 *** A0A2G2XDH3_CAPBA)	TRUE
Solyc03g114350.1.1	1.04114	0.00575522	0.0324714	DUF1645 family protein (AHRD V3.3 *** G7J5G5_MEDTR)	TRUE
Solyc08g007340.3.1	1.03962	0.00235717	0.0160433	Protein transport protein sec16 (AHRD V3.3 *** A0A2G3AP26_CAPAN)	TRUE
Solyc09g090710.3.1	1.03833	0.00032568	0.0031813	Unknown protein	TRUE
Solyc06g030470.4.1	1.03822	0.00269817	0.0179023	UPSTREAM OF FLC protein (DUF966) (AHRD V3.3 *** Q8GYT8_ARATH)	TRUE
Solyc06g060570.3.1	1.03815	1.77095e-12	1.25033e-10	dihydrofolate reductase-like (AHRD V3.3 *** A0A2I4ECQ2_9ROSI)	TRUE
Solyc08g076860.3.1	1.03731	0.000317305	0.00311613	PLATZ transcription factor family protein (AHRD V3.3 *** F4IEB6_ARATH)	TRUE
Solyc08g079530.3.1	1.03698	2.37744e-06	4.37803e-05	Deoxyribodipyrimidine photo-lyase (AHRD V3.3 *** A0A2G3DBR9_CAPCH)	FALSE
Solyc11g011030.2.1	1.03656	0.000676352	0.00580374	Pto-responsive gene 1	TRUE
Solyc08g007790.3.1	1.03655	0.0059987	0.0336559	3-hydroxy-3-methylglutaryl coenzyme A synthase	FALSE
Solyc06g060690.3.1	1.03613	0.000559768	0.00493773	Protein kinase superfamily protein (AHRD V3.3 *** Q9SVY4_ARATH)	FALSE
Solyc03g082850.3.1	1.03479	0.00441942	0.0264269	3'-5' exonuclease domain (AHRD V3.3 *** A0A200Q766_9MAGN)	TRUE
Solyc01g094220.3.1	1.03245	3.00457e-05	0.000407277	NAD(P)-binding Rossmann-fold superfamily protein (AHRD V3.3 *** A0A2U1PI94_ARTAN)	FALSE
Solyc12g099420.2.1	1.03243	0.00442625	0.0264591	Condensin-2 complex subunit H2 (AHRD V3.3 *** A0A1J3GA08_NOCCA)	TRUE
Solyc01g066060.4.1	1.02933	0.00419096	0.0254943	Multiple organellar RNA editing factor 3, mitochondrial (AHRD V3.3 *** A0A2G3AIV4_CAPAN)	TRUE
Solyc02g086970.4.1	1.02676	1.62443e-08	5.06901e-07	Aldehyde dehydrogenase (AHRD V3.3 *** A0A2U1MUY7_ARTAN)	FALSE
Solyc11g069180.2.1	1.02569	1.75499e-07	4.38412e-06	Isovaleryl-CoA dehydrogenase (AHRD V3.3 *** B4FQ64_MAIZE)	FALSE
Solyc12g070157.1.1	1.02507	2.5799e-05	0.000354441	Unknown protein	FALSE
Solyc08g006350.3.1	1.02455	3.52722e-08	1.01733e-06	Glycosyltransferase (AHRD V3.3 *** B9VJL9_9SOLA)	FALSE
Solyc08g006770.3.1	1.02419	0.00282052	0.0185592	2-oxoglutarate (2OG) and Fe(II)-dependent oxygenase superfamily protein (AHRD V3.3 *** A0A2U1MCV6_ARTAN)	FALSE
Solyc07g065680.3.1	1.02341	0.0078378	0.041615	WEB family protein (AHRD V3.3 *** A0A1U8HJQ2_CAPAN)	TRUE
Solyc04g049670.4.1	1.02297	2.0195e-09	7.94163e-08	Pseudo-response regulator (AHRD V3.3 *** X5I0R0_IPONI)	TRUE
Solyc01g107560.3.1	1.02295	0.00833313	0.0436752	Glycosyltransferase (AHRD V3.3 *** A0A2G2W4I0_CAPBA)	FALSE
Solyc02g069180.4.1	1.02266	0.00420721	0.0255252	SBP (S-ribonuclease binding protein) family protein (AHRD V3.3 *-* A0A2U1LW40_ARTAN)	TRUE
Solyc03g111550.4.1	1.01803	0.000570995	0.00502506	GDSL esterase/lipase (AHRD V3.3 *** A0A2G3CCU4_CAPCH)	FALSE
Solyc12g008560.1.1	1.01796	9.77705e-09	3.2506e-07	Unknown protein	TRUE
Solyc12g094520.2.1	1.01772	4.35864e-05	0.000564863	4-coumarate--CoA ligase-like 4 (AHRD V3.3 *** A0A2G3B4I9_CAPCH)	FALSE
Solyc05g005280.4.1	1.01694	0.00137078	0.0103238	Poly [ADP-ribose] polymerase (AHRD V3.3 *** A0A2G2WJW6_CAPBA)	TRUE
Solyc02g071990.3.1	1.01585	2.93628e-06	5.30202e-05	BES1/BZR1 (AHRD V3.3 *** A0A2K3PP13_TRIPR)	TRUE
Solyc06g083390.4.1	1.01555	9.38115e-10	4.01742e-08	RPM1-interacting protein 4 (AHRD V3.3 *** A0A1P8SF00_NICBE)	TRUE
Solyc10g085180.2.1	1.01528	0.000177393	0.00190812	PHD finger protein ALFIN-LIKE 1 (AHRD V3.3 *** A0A1U8E9Y3_CAPAN)	TRUE
Solyc11g072120.2.1	1.01491	2.26961e-05	0.000317537	2-oxoglutarate (2OG) and Fe(II)-dependent oxygenase superfamily protein (AHRD V3.3 *** A0A2U1N5S2_ARTAN)	TRUE
Solyc04g008500.4.1	1.01427	0.000162636	0.00176405	Protein indeterminate-domain 6, chloroplastic (AHRD V3.3 *** A0A2G3CF47_CAPCH)	TRUE
Solyc07g063650.4.1	1.0132	0.00426614	0.0257972	Ubiquitin carboxyl-terminal hydrolase (AHRD V3.3 *** A0A2G2Z5A0_CAPAN)	TRUE
Solyc08g082830.3.1	1.00944	2.1776e-07	5.29516e-06	Glutamine-dependent NAD(+) synthetase (AHRD V3.3 *** A0A2G3DAE2_CAPCH)	FALSE
Solyc09g014400.3.1	1.00864	9.2145e-08	2.4598e-06	Phosphoglucan, water dikinase, chloroplastic (AHRD V3.3 *-* A0A1J3J5B0_NOCCA)	TRUE
Solyc01g103570.3.1	1.00821	0.000524296	0.00467027	DNA-binding bromodomain-containing protein (AHRD V3.3 *** F4I9P8_ARATH)	TRUE
Solyc07g055980.3.1	1.00778	0.000410965	0.00386968	Haloacid dehalogenase (HAD) superfamily protein (AHRD V3.3 *** A0A2U1ND25_ARTAN)	TRUE
Solyc01g006555.1.1	1.0074	1.14286e-05	0.000175468	Lipoxygenase (AHRD V3.3 *** C0KKU8_SOLLC)	TRUE
Solyc06g060150.3.1	1.00735	0.000333363	0.00324249	Replication factor C subunit 5 (AHRD V3.3 *** A0A2G3C770_CAPCH)	TRUE
Solyc01g066440.3.1	1.00725	0.00543755	0.0311208	hypothetical protein (AHRD V3.3 *** AT3G06840.1)	TRUE
Solyc03g122340.3.1	1.00717	0.000723972	0.00612896	lipoxygenase D	TRUE
Solyc03g044480.3.1	1.00582	0.00242207	0.0164098	Cyclin-dependent kinase inhibitor 1 (AHRD V3.3 --* KRP1_ARATH)	TRUE
Solyc03g093430.3.1	1.00379	1.04608e-05	0.000163213	Small G protein family protein / RhoGAP family protein (AHRD V3.3 *** A0A2U1Q0F6_ARTAN)	FALSE
Solyc02g087050.2.1	1.00364	0.000900138	0.00734818	WAT1-related protein (AHRD V3.3 *** K4BBL2_SOLLC)	FALSE
Solyc05g006750.3.1	1.00324	0.00380096	0.0235369	Glutathione S-transferase (AHRD V3.3 *** A0A200QY01_9MAGN)	FALSE
Solyc07g022910.3.1	1.00244	0.00619926	0.0346348	Protein WEAK CHLOROPLAST MOVEMENT UNDER BLUE LIGHT 1 (AHRD V3.3 *** A0A2G2VC40_CAPBA)	TRUE
Solyc01g073770.2.1	1.0019	0.000980512	0.00787424	PRLI-interacting factor (AHRD V3.3 *-* AT5G19900.5)	TRUE
Solyc05g055240.3.1	1.00107	0.000115851	0.00131254	I-box binding factor	TRUE

## Sheet: DOWN
Supplemental Table S6. Down-regulated DEGs of E3H90m vs W3H90m in shoots (log2 fold change ≦ -1.0, p_value < 0.05, p_adj < 0.1).
Geneid	log2FoldChange	p_value	p_adj	Annotation
Solyc01g067460.3.1	-5.07203	2.54204e-07	6.08426e-06	monothiol glutaredoxin-S2-like (AHRD V3.3 *** A0A1U7VLQ4_NICSY)
Solyc04g011840.1.1	-4.5321	6.96494e-05	0.00084683	Glutaredoxin (AHRD V3.3 *** A0A1L7MRR3_SOLPI)
Solyc01g106650.3.1	-4.19013	9.02645e-06	0.000144063	Xyloglucan endotransglucosylase/hydrolase (AHRD V3.3 *** A0A2G2V8Q2_CAPBA)
Solyc02g089150.4.1	-3.83183	1.44582e-05	0.000215295	PI-PLC X domain-containing protein (AHRD V3.3 *** A0A1U8FSV1_CAPAN)
Solyc10g007440.3.1	-3.77498	0.000397444	0.00376173	Zinc finger protein (AHRD V3.3 *-* A0A200PU12_9MAGN)
Solyc02g067620.3.1	-3.75051	0.000346313	0.00335493	Metal tolerance protein 8 (AHRD V3.3 *-* A0A2G2Y0P2_CAPAN)
Solyc02g065290.1.1	-3.71382	0.00102564	0.00815781	Dof zinc finger protein2
Solyc01g110860.1.1	-3.69756	0.000140194	0.001549	Auxin-responsive protein SAUR21 (AHRD V3.3 *** A0A2G2XY50_CAPAN)
Solyc09g065040.1.1	-3.5472	0.000148202	0.0016296	Cysteine-rich receptor-like protein kinase (AHRD V3.3 *-* A0A2K3KZ48_TRIPR)
Solyc09g011070.1.1	-3.41791	0.00154504	0.0113968	Lectin receptor kinase (AHRD V3.3 *** B8XSM8_WHEAT)
Solyc08g077360.3.1	-3.37546	0.00218803	0.0151555	Dynamin (AHRD V3.3 *** E5GB64_CUCME)
Solyc05g054700.3.1	-3.36816	0.000240347	0.00246038	MAP kinase phosphatase
Solyc03g093460.3.1	-3.34212	0.00533249	0.0306346	Protein kinase family protein (AHRD V3.3 *** S8C142_9LAMI)
Solyc02g081130.3.1	-3.3117	0.00213986	0.014876	PHD finger family protein / bromo-adjacent homology (BAH) domain-containing protein (AHRD V3.3 *** A0A2U1QHU8_ARTAN)
Solyc03g112880.1.1	-3.26281	0.00136463	0.0102987	fasciclin-like arabinogalactan protein 4 (AHRD V3.3 *** A0A1U7WCV8_NICSY)
Solyc04g014260.2.1	-3.24635	0.00322359	0.0206468	Zinc-finger homeodomain protein 1 (AHRD V3.3 *** A0A2G3CDG4_CAPCH)
Solyc03g026010.3.1	-3.23108	0.00274729	0.0181886	transmembrane protein 161AB protein (AHRD V3.3 *** AT5G52180.1)
Solyc07g052730.3.1	-3.22791	0.00378504	0.0234462	formin I2I isoform
Solyc08g081710.3.1	-3.2252	0.00338871	0.0214712	membrane-associated kinase regulator (AHRD V3.3 *** AT1G64080.1)
Solyc03g093120.5.1	-3.21203	0.000669717	0.0057739	#N/A
Solyc04g076640.3.1	-3.1174	0.00854178	0.0445889	Rhamnogalacturonate lyase (AHRD V3.3 *** A0A200QXQ6_9MAGN)
Solyc10g083170.2.1	-3.11131	0.00126615	0.00967122	NAD(P)-binding Rossmann-fold superfamily protein (AHRD V3.3 *** A0A2U1QER6_ARTAN),Pfam:PF13561
Solyc04g078660.2.1	-3.05335	0.00521683	0.030093	HXXXD-type acyl-transferase family protein (AHRD V3.3 *** A0A2U1LZ70_ARTAN)
Solyc10g045490.2.1	-3.03169	0.00309747	0.0199368	Plant organelle RNA recognition domain-containing protein (AHRD V3.3 *-* A0A2U1N2X7_ARTAN)
Solyc12g089190.1.1	-3.02322	0.00717116	0.038856	Protein RADIALIS-like 6 (AHRD V3.3 *** A0A1U8ERP9_CAPAN)
Solyc05g015330.1.1	-2.96818	0.00112509	0.00881468	Nuclear transcription factor Y subunit C-4-like protein (AHRD V3.3 *** A0A2K3NUG6_TRIPR)
Solyc09g091220.3.1	-2.93232	0.00565294	0.0320815	F-box associated interaction domain-containing protein (AHRD V3.3 *** A0A2U1PT01_ARTAN)
Solyc09g090690.4.1	-2.90715	0.00652726	0.0361074	S-adenosyl-L-methionine-dependent methyltransferases superfamily protein (AHRD V3.3 *** AT4G13330.4)
Solyc11g062220.2.1	-2.89783	0.000874756	0.00716535	Zinc finger CCCH domain-containing protein 44 (AHRD V3.3 *-* A0A2G3B9D7_CAPCH)
Solyc12g011030.3.1	-2.89515	1.93029e-08	5.89271e-07	xyloglucan endotransglucosylase-hydrolase 9
Solyc09g075600.3.1	-2.8835	8.53344e-12	5.25395e-10	GATA transcription factor-like protein (AHRD V3.3 *-* AT1G02700.1)
Solyc04g011810.1.1	-2.87482	0.000586531	0.00514157	Glutaredoxin (AHRD V3.3 *** A0A1L7MRR3_SOLPI)
Solyc06g076540.1.1	-2.85421	8.00117e-06	0.000130053	Class I heat shock protein (AHRD V3.3 *** A0A2K3M3P7_TRIPR)
Solyc12g055810.1.1	-2.82612	0.00214017	0.014876	P-loop containing nucleoside triphosphate hydrolases superfamily protein (AHRD V3.3 *** A0A1P8B3B9_ARATH)
Solyc09g047930.1.1	-2.80404	0.00118223	0.00915933	Maternal effect embryo arrest protein (AHRD V3.3 *** Q94K16_ARATH)
Solyc04g007720.3.1	-2.80032	0.0086733	0.0451466	HMG-Y-related protein A-like (AHRD V3.3 *-* XP_010312913.1)
Solyc07g006370.1.1	-2.79664	0.00301898	0.0195537	cation/calcium exchanger 1 (AHRD V3.3 *** A0A2I4FP28_9ROSI)
Solyc02g078170.3.1	-2.78629	0.00871213	0.0453229	Lectin receptor kinase (AHRD V3.3 *** A0A2K3NP35_TRIPR)
Solyc01g099120.4.1	-2.77193	0.000766871	0.00642373	Protein AUXIN RESPONSE 4 (AHRD V3.3 *-* A0A2G2Y0B6_CAPAN)
Solyc02g072500.3.1	-2.71169	0.00543186	0.0311077	Nucleobase-ascorbate transporter 7 (AHRD V3.3 *** A0A1U8FKB3_CAPAN)
Solyc03g111530.4.1	-2.70235	0.00982576	0.0495379	Cysteine-rich receptor-like protein kinase (AHRD V3.3 *** A0A2K3LJD5_TRIPR)
Solyc07g047823.1.1	-2.67344	0.00814444	0.0428725	Unknown protein
Solyc02g005320.2.1	-2.63402	2.65389e-05	0.000363241	Unknown protein
Solyc04g080180.1.1	-2.63004	0.00436717	0.0262336	membrane protein (AHRD V3.3 *** AT1G75140.1)
Solyc02g085130.4.1	-2.60739	0.000219487	0.00227654	Tubby-like F-box protein (AHRD V3.3 *** A0A2G3D7T8_CAPCH)
Solyc01g079940.4.1	-2.60466	0.000837259	0.00690266	Eukaryotic aspartyl protease family protein (AHRD V3.3 *** A0A2U1KXX4_ARTAN)
Solyc10g009410.1.1	-2.59086	0.00374916	0.0232713	Eukaryotic aspartyl protease family protein (AHRD V3.3 *** A0A072U5I5_MEDTR)
Solyc03g096050.3.1	-2.5648	0.00257046	0.0171809	2-oxoglutarate (2OG) and Fe(II)-dependent oxygenase superfamily protein (AHRD V3.3 *** F4J670_ARATH)
Solyc07g045030.4.1	-2.53896	0.00513389	0.0297083	NAC domain-containing protein (AHRD V3.3 *** A0A2K3NPJ8_TRIPR)
Solyc10g055810.2.1	-2.52794	0.000573701	0.00504603	chitinase Z15140
Solyc06g066670.4.1	-2.52029	1.28904e-05	0.000194966	RNA helicase DEAH-box20
Solyc01g111800.4.1	-2.49131	0.00254389	0.0170519	Polyamine transporter PUT1 (AHRD V3.3 *** A0A2G3AUC9_CAPCH)
Solyc04g074420.1.1	-2.43448	0.0012672	0.00967518	Protein EXORDIUM-like 1 (AHRD V3.3 *-* A0A2G2WZY1_CAPBA)
Solyc09g010220.4.1	-2.42288	0.00112357	0.00880654	lysosomal Pro-X carboxypeptidase (AHRD V3.3 *** A0A2I4EKY3_9ROSI)
Solyc06g061200.1.1	-2.42222	3.0854e-07	7.21478e-06	glycine-rich protein 1
Solyc04g010285.1.1	-2.41522	0.00833331	0.0436752	Plant protein 1589 of Uncharacterized protein function (AHRD V3.3 *** A0A061FM19_THECC)
Solyc04g074440.1.1	-2.37021	2.60609e-06	4.75124e-05	Protein EXORDIUM-like 1 (AHRD V3.3 *** A0A2G2ZQI6_CAPAN)
Solyc01g107370.3.1	-2.36725	0.000419804	0.00392862	Gibberellin-regulated protein (AHRD V3.3 *** K0E174_POPTO)
Solyc01g105330.3.1	-2.35961	0.0037118	0.0230679	Methyl-CpG binding domain protein (AHRD V3.3 *-* A0A2K3LPB7_TRIPR)
Solyc09g074180.3.1	-2.35666	0.000787531	0.00655773	Unknown protein
Solyc01g105320.4.1	-2.34468	0.00984264	0.0496093	Metacaspase-1 (AHRD V3.3 *** A0A2G3AV17_CAPCH),Pfam:PF00656
Solyc05g008030.1.1	-2.3338	0.000372466	0.00357341	ATP-dependent DNA helicase RecG (AHRD V3.3 *-* A0A2U1NGD0_ARTAN)
Solyc02g080550.1.1	-2.32577	0.00689032	0.0376784	Unknown protein
Solyc05g051900.3.1	-2.29328	0.00183444	0.0130829	Major facilitator superfamily (AHRD V3.3 *** A0A200QUR2_9MAGN)
Solyc11g007570.2.1	-2.25736	0.00582053	0.0327591	Bifunctional TENA-E protein (AHRD V3.3 *** A0A2G2VCV3_CAPBA)
Solyc02g032930.3.1	-2.21374	4.62634e-20	1.65877e-17	B-cell receptor-associated 31-like (AHRD V3.3 *** A0A200QH03_9MAGN)
Solyc03g120790.1.1	-2.20676	0.00649159	0.0359604	ovate family protein 8
Solyc10g081450.2.1	-2.20054	6.52485e-12	4.11426e-10	Alpha/beta-Hydrolases superfamily protein (AHRD V3.3 *** A0A2U1LTX8_ARTAN)
Solyc11g005150.3.1	-2.1942	0.00322749	0.0206646	entensin X55687
Solyc05g008480.4.1	-2.18268	1.91956e-06	3.62615e-05	Histone chaperone (AHRD V3.3 *-* A9U2F4_PHYPA)
Solyc07g062120.4.1	-2.17608	0.00460605	0.0273196	Bidirectional sugar transporter SWEET (AHRD V3.3 *** A0A142DVG3_SOLTU)
Solyc10g075150.2.1	-2.16694	3.55055e-05	0.000471499	Non-specific lipid-transfer protein (AHRD V3.3 *** A0A2G2YKI8_CAPAN)
Solyc10g084830.2.1	-2.16539	8.96702e-05	0.00105312	Amino acid transporter (AHRD V3.3 *** S8DQ51_9LAMI)
Solyc09g097770.3.1	-2.14346	9.83427e-15	1.16772e-12	Cell wall protein (AHRD V3.3 *** Q40142_SOLLC)
Solyc05g009250.1.1	-2.14135	0.000467443	0.00426318	Ethylene-responsive transcription factor (AHRD V3.3 *** A0A2G3AQY9_CAPCH)
Solyc03g121240.1.1	-2.13843	0.00278892	0.018391	Transcription factor HEC2 (AHRD V3.3 *** A0A2G2WPZ2_CAPBA)
Solyc09g091000.4.1	-2.13124	0.00162932	0.0119298	Pathogenesis-related protein STH-2 (AHRD V3.3 *** PRS2_SOLTU)
Solyc02g083820.1.1	-2.13099	0.00537064	0.0308247	Armadillo repeat only 2 (AHRD V3.3 *** Q9FKW5_ARATH)
Solyc02g092110.3.1	-2.11862	7.22497e-20	2.40211e-17	Phytosulfokines 3 (AHRD V3.3 *** A0A2I0WHI7_9ASPA)
Solyc01g007140.3.1	-2.11196	0.00398632	0.024461	ARM repeat superfamily protein (AHRD V3.3 *** AT5G06350.2)
Solyc12g011023.1.1	-2.10847	2.02424e-11	1.15312e-09	Xyloglucan endotransglucosylase/hydrolase (AHRD V3.3 *** Q6RHX7_SOLLC)
Solyc12g010950.2.1	-2.1081	0.00247141	0.0166516	2-alkenal reductase (NADP(+)-dependent) (AHRD V3.3 *** A0A1U8EE67_CAPAN)
Solyc05g014480.4.1	-2.09596	0.00120845	0.00930937	Glyceraldehyde-3-phosphate dehydrogenase (AHRD V3.3 *-* A0A078FNT0_BRANA)
Solyc09g065580.4.1	-2.09329	2.48319e-05	0.000343737	2-oxoglutarate (2OG) and Fe(II)-dependent oxygenase superfamily protein (AHRD V3.3 *-* A0A2U1LW75_ARTAN)
Solyc03g006350.3.1	-2.08435	0.00224776	0.0154637	Zinc finger transcription factor 23
Solyc04g074470.1.1	-2.07553	0.00783322	0.0416028	Protein EXORDIUM-like 2 (AHRD V3.3 *** A0A2G3CNT3_CAPCH)
Solyc12g044330.2.1	-2.06624	2.6405e-29	6.89773e-26	tonoplast intrinsic protein 2.1
Solyc10g054930.2.1	-2.05704	0.000461818	0.00422875	magnesium transporter NIPA (DUF803) (AHRD V3.3 *** AT4G13800.8)
Solyc01g058270.3.1	-2.05321	6.50789e-05	0.000801369	O-acetyltransferase family protein (AHRD V3.3 *** A0A2U1M4H7_ARTAN)
Solyc06g069730.3.1	-2.03972	4.47036e-11	2.44015e-09	Chlorophyll a-b binding protein, chloroplastic (AHRD V3.3 *** A0A1U8GPF4_CAPAN)
Solyc07g063560.4.1	-2.02484	0.00619377	0.0346147	Cotton fiber (DUF761) (AHRD V3.3 *** F4HTI9_ARATH)
Solyc03g117160.4.1	-2.02347	1.11626e-05	0.000172399	Unknown protein
Solyc01g111660.4.1	-2.01229	2.59677e-21	1.15816e-18	plasma membrane intrinsic protein 2.8
Solyc06g083270.3.1	-2.01075	4.73133e-06	8.15429e-05	ER lumen protein retaining receptor (AHRD V3.3 *** A0A200QBW0_9MAGN)
Solyc10g050220.2.1	-1.99999	0.00103444	0.00820997	hypothetical protein (AHRD V3.3 *-* AT4G33980.2)
Solyc06g073820.3.1	-1.9997	0.000723869	0.00612896	Ubiquitin carboxyl-terminal hydrolase 12 (AHRD V3.3 *** A0A2G2XWY4_CAPAN)
Solyc05g050570.3.1	-1.99568	0.00180115	0.012902	Cyclic pyranopterin monophosphate synthase accessory protein (AHRD V3.3 *** A0A2G2WSM4_CAPBA)
Solyc11g065120.3.1	-1.99021	0.00440688	0.0263851	Regulator of chromosome condensation (RCC1) family with FYVE zinc finger domain-containing protein (AHRD V3.3 *** F4K149_ARATH)
Solyc01g099630.4.1	-1.99015	2.0687e-26	1.80134e-23	xyloglucan endotransglucosylase-hydrolase 1
Solyc06g065970.1.1	-1.98631	4.85622e-17	9.25008e-15	Bifunctional inhibitor/lipid-transfer protein/seed storage 2S albumin superfamily protein (AHRD V3.3 *** A0A2U1PU47_ARTAN)
Solyc06g069600.3.1	-1.97935	0.00150697	0.011152	bHLH transcription factor 047
Solyc03g120660.4.1	-1.97693	0.00748757	0.0401283	D-isomer specific 2-hydroxyacid dehydrogenase (AHRD V3.3 *** A0A200RC95_9MAGN)
Solyc09g092580.4.1	-1.97614	0.00352737	0.0221653	Cytochrome (AHRD V3.3 *** A0A2G2ZTD7_CAPAN)
Solyc09g064800.3.1	-1.97259	0.00492991	0.0288106	Isoamylase 2, chloroplastic (AHRD V3.3 *** A0A2G3A6V3_CAPAN)
Solyc03g093130.3.1	-1.97045	1.61548e-08	5.05833e-07	xyloglucan endotransglucosylase-hydrolase 3
Solyc03g150117.1.1	-1.97002	0.00600012	0.0336559	Retrovirus-related Pol polyprotein from transposon TNT 1-94 (AHRD V3.3 *-* A0A1J3HZ90_NOCCA)
Solyc10g018260.1.1	-1.96883	7.57512e-05	0.000912507	UDP-glucuronate 4-epimerase 4 (AHRD V3.3 *** A0A1J3F7T2_NOCCA)
Solyc12g013710.2.1	-1.95921	9.58729e-14	8.80971e-12	light dependent NADH:protochlorophyllide oxidoreductase 1
Solyc09g084490.4.1	-1.94748	0.00936735	0.0478347	Proteinase inhibitor 1 PPI3B2 (AHRD V3.3 *** Q4FE26_SOLTU)
Solyc04g082590.3.1	-1.94582	3.73536e-08	1.07229e-06	TLR4 regulator/MIR-interacting MSAP protein (AHRD V3.3 *** AT1G42480.1)
Solyc02g070980.1.1	-1.94199	7.47007e-11	3.89167e-09	Chlorophyll a-b binding protein, chloroplastic (AHRD V3.3 *-* A0A2G3A7J8_CAPAN)
Solyc06g054100.2.1	-1.93254	6.59554e-08	1.80009e-06	Folate-biopterin transporter 1, chloroplastic (AHRD V3.3 *-* A0A1U8H2J4_CAPAN)
Solyc10g081810.3.1	-1.89561	0.00024513	0.00250276	MD-2-related lipid recognition domain-containing protein / ML domain-containing protein (AHRD V3.3 *** A0A2U1NF61_ARTAN)
Solyc02g070990.1.1	-1.89479	2.02602e-09	7.95018e-08	Chlorophyll a-b binding protein, chloroplastic (AHRD V3.3 *** A0A2G3A7J8_CAPAN)
Solyc02g083610.4.1	-1.89402	0.00729549	0.0392946	Ras domain-containing protein/DUF632 domain-containing protein/DUF630 domain-containing protein (AHRD V3.3 *** A0A1Q3BAN2_CEPFO)
Solyc07g017940.1.1	-1.88643	0.00175947	0.0126518	ribosomal RNA processing protein 1 homolog (AHRD V3.3 *-* A0A2I4GLN2_9ROSI)
Solyc04g074450.1.1	-1.87661	4.06395e-17	7.82245e-15	Protein EXORDIUM-like 1 (AHRD V3.3 *** A0A2G2ZQI6_CAPAN)
Solyc08g077290.1.1	-1.87594	0.00344103	0.0217199	DnaJ subfamily c member 2-like protein (AHRD V3.3 *** A0A2K3NSH6_TRIPR)
Solyc02g087260.1.1	-1.87367	0.000485282	0.00439518	DUF716 domain-containing protein (AHRD V3.3 *** A0A1Q3C3N0_CEPFO)
Solyc06g065750.1.1	-1.86559	0.000377246	0.00361358	Protein kinase-like protein (AHRD V3.3 *** Q8LCP0_ARATH)
Solyc12g009650.2.1	-1.86283	6.73719e-11	3.52904e-09	Sl proline-rich protein
Solyc02g081210.3.1	-1.84253	0.00104652	0.00829148	Expansin (AHRD V3.3 *** K4B9Z1_SOLLC)
Solyc02g085340.1.1	-1.84221	6.53493e-09	2.26322e-07	Transcription factor GRAS (AHRD V3.3 *** A0A200Q206_9MAGN)
Solyc07g064500.3.1	-1.84183	9.62372e-08	2.55413e-06	Purple acid phosphatase (AHRD V3.3 *** A0A2G2WF94_CAPBA)
Solyc02g031830.1.1	-1.84055	1.42633e-05	0.000212913	polyadenylate-binding protein 1-B-binding protein (AHRD V3.3 *** AT5G44860.2)
Solyc05g049960.4.1	-1.83916	0.0043257	0.0260368	ELM2 domain-containing protein (AHRD V3.3 *** A0A2U1QGB1_ARTAN)
Solyc02g070950.1.1	-1.82686	1.99709e-10	9.79057e-09	Chlorophyll a-b binding protein, chloroplastic (AHRD V3.3 *** A0A2G3A7J8_CAPAN)
Solyc08g066430.1.1	-1.82627	4.13589e-05	0.00053982	Polyketide cyclase/dehydrase and lipid transport superfamily protein (AHRD V3.3 *** A0A2U1M5K6_ARTAN)
Solyc01g081250.3.1	-1.82566	2.94688e-07	6.92631e-06	Glutathione S-transferase (AHRD V3.3 *** A0A200PVK3_9MAGN)
Solyc03g112500.4.1	-1.82392	1.17773e-11	7.03787e-10	Raffinose synthase (AHRD V3.3 *** G5DF09_9LAMI)
Solyc08g067370.1.1	-1.82383	0.000437431	0.00404187	serine/arginine repetitive matrix protein (AHRD V3.3 *-* AT2G46630.1)
Solyc02g071000.1.1	-1.81561	2.23679e-09	8.68408e-08	Chlorophyll a-b binding protein, chloroplastic (AHRD V3.3 *** A0A2G3A7J8_CAPAN)
Solyc11g010890.3.1	-1.80832	9.04739e-23	5.01335e-20	Exostosin-like (AHRD V3.3 *** A0A200PNJ6_9MAGN)
Solyc02g067690.3.1	-1.79625	3.33424e-07	7.7177e-06	Glycosyltransferase (AHRD V3.3 *** A0A2U1M9M1_ARTAN)
Solyc06g030510.4.1	-1.79088	0.000978587	0.00786569	HAT transposon superfamily (AHRD V3.3 *** A0A2U1MJ98_ARTAN)
Solyc12g009840.2.1	-1.78264	0.000321985	0.00314856	Pyrophosphate-energized vacuolar membrane proton pump (AHRD V3.3 *** A0A2G3BP86_CAPCH)
Solyc07g052640.3.1	-1.77863	0.0041338	0.0252221	Glycosyltransferase (DUF604) (AHRD V3.3 *** F4JJF6_ARATH)
Solyc07g045320.3.1	-1.77538	2.1773e-05	0.000305872	SAWADEE domain-containing protein (AHRD V3.3 *** A0A2U1MTI3_ARTAN)
Solyc09g065780.3.1	-1.76989	1.25819e-05	0.000190615	3-ketoacyl-CoA synthase (AHRD V3.3 *** A0A2U1NFY7_ARTAN)
Solyc05g054680.1.1	-1.75502	0.000534498	0.00473756	Receptor-like protein kinase THESEUS 1 (AHRD V3.3 *** A0A2G2WVE3_CAPBA)
Solyc08g066450.1.1	-1.74627	0.00040587	0.00382366	DUF1677 family protein (DUF1677) (AHRD V3.3 *** Q8GW85_ARATH)
Solyc08g078840.3.1	-1.74243	0.00122094	0.00939257	Root meristem growth factor 6 (AHRD V3.3 *** A0A2G3CC16_CAPCH)
Solyc01g095290.4.1	-1.71368	0.000314942	0.00309459	Glycosyltransferase (AHRD V3.3 *** A0A1U8DT12_CAPAN)
Solyc08g076883.1.1	-1.71224	8.8822e-09	3.00222e-07	Unknown protein
Solyc06g053387.1.1	-1.70897	5.85862e-12	3.73278e-10	Unknown protein
Solyc04g007780.3.1	-1.70726	4.24133e-13	3.40162e-11	Sn-1 protein (AHRD V3.3 *** Q42393_CAPAN)
Solyc09g065360.4.1	-1.70712	0.00262774	0.0174794	Late embryogenesis abundant protein D-34 (AHRD V3.3 *** A0A2G3BKZ9_CAPCH)
Solyc05g009920.4.1	-1.70275	2.53684e-27	2.89929e-24	P-loop containing nucleoside triphosphate hydrolases superfamily protein (AHRD V3.3 *** A0A2K3PL22_TRIPR)
Solyc10g075110.2.1	-1.70134	2.57051e-06	4.69106e-05	Non-specific lipid-transfer protein (AHRD V3.3 *** M1AVB9_SOLTU)
Solyc05g050130.4.1	-1.69445	1.30958e-14	1.49668e-12	Acidic endochitinase (AHRD V3.3 *** CHIA_TOBAC)
Solyc01g080010.2.1	-1.69315	0.000158394	0.00172097	xyloglucan endoglucanase inhibitor
Solyc00g020020.2.1	-1.69031	0.00880127	0.0456757	Unknown protein
Solyc09g075210.3.1	-1.68772	3.50025e-09	1.30624e-07	Late embryogenesis abundant protein Lea5 (AHRD V3.3 *** A0A1J3JXG8_NOCCA)
Solyc12g098463.1.1	-1.67783	0.00464977	0.0275253	myb-like protein X (AHRD V3.3 *-* A0A2I4GJJ9_9ROSI)
Solyc05g013140.4.1	-1.67153	1.02265e-09	4.31873e-08	O-fucosyltransferase (AHRD V3.3 *** A0A2P5G0B7_TREOI)
Solyc03g111940.2.1	-1.66143	0.00112747	0.00882571	Cytochrome P450 71A6 (AHRD V3.3 *** A0A2G2ZZC6_CAPAN)
Solyc02g086454.1.1	-1.64787	0.00449226	0.0267662	titin isoform X6 (AHRD V3.3 *-* XP_010316304.1)
Solyc03g098330.2.1	-1.63982	9.30191e-07	1.91764e-05	Coiled coil protein (AHRD V3.3 *** A0A1P8B4G0_ARATH)
Solyc04g015620.3.1	-1.63526	0.000132561	0.00147446	DUF642 domain-containing protein (AHRD V3.3 *** A0A1Q3AUQ6_CEPFO)
Solyc07g025457.1.1	-1.63239	2.51778e-05	0.000346949	40S ribosomal protein S15 (AHRD V3.3 --* A0A2G3D6Q0_CAPCH)
Solyc06g074820.3.1	-1.62968	3.45866e-24	2.10817e-21	tonoplast intrinsic protein 1.1
Solyc12g096530.1.1	-1.62961	0.00278459	0.0183804	Peroxidase (AHRD V3.3 *** K4DHC6_SOLLC)
Solyc02g093770.3.1	-1.62692	0.00731198	0.0393603	GPI inositol-deacylase (AHRD V3.3 *** A0A1J3D6Y4_NOCCA)
Solyc09g011520.3.1	-1.62173	0.00198799	0.0139979	Glutathione S-transferase-like protein (AHRD V3.3 *** A8DUB0_SOLLC)
Solyc02g091920.3.1	-1.61405	7.83094e-27	7.95537e-24	xyloglucan endotransglucosylase-hydrolase 7
Solyc09g073015.1.1	-1.61092	0.000636298	0.00551961	Flavin-containing monooxygenase (AHRD V3.3 *-* A0A2G2YF03_CAPAN)
Solyc12g038140.1.1	-1.60667	0.00409202	0.0250173	hypothetical protein (AHRD V3.3 *-* AT5G13620.1)
Solyc02g067060.3.1	-1.60456	0.000654828	0.00566691	Hexosyltransferase (AHRD V3.3 *** A0A1U8FIH2_CAPAN)
Solyc07g005860.3.1	-1.60401	4.35424e-12	2.80358e-10	QWRF motif protein (DUF566) (AHRD V3.3 *-* A0A1P8B957_ARATH)
Solyc02g087190.1.1	-1.60359	1.96107e-09	7.77636e-08	Peroxidase (AHRD V3.3 *** K4BBM6_SOLLC)
Solyc08g075930.4.1	-1.60334	0.00400473	0.0245657	Kinesin-like protein (AHRD V3.3 *-* B6U4W1_MAIZE)
Solyc07g054070.4.1	-1.59673	0.00298381	0.0193757	DTW domain-containing protein (AHRD V3.3 *** A0A2U1N2D0_ARTAN)
Solyc03g095300.4.1	-1.59634	0.00153038	0.0113023	Calcium-dependent lipid-binding (CaLB domain) family protein (AHRD V3.3 *** A0A2K3P5L3_TRIPR)
Solyc01g107740.3.1	-1.59378	1.79253e-06	3.40377e-05	C2 domain-containing protein (AHRD V3.3 *** B1Q483_CAPCH)
Solyc08g066610.3.1	-1.59334	5.58945e-16	8.66175e-14	EPIDERMAL PATTERNING FACTOR-like protein 9 (AHRD V3.3 *** A0A2G2WD44_CAPBA)
Solyc02g086740.1.1	-1.58594	2.17358e-13	1.87482e-11	50S ribosomal protein L12, chloroplastic (AHRD V3.3 *** A0A2G3D9E1_CAPCH)
Solyc11g013080.3.1	-1.58211	0.000153421	0.00167891	Membrane insertion protein, OxaA/YidC with tetratricopeptide repeat domain-containing protein (AHRD V3.3 *-* A0A1I9LM69_ARATH)
Solyc12g056710.3.1	-1.58168	0.0011071	0.0086849	Secoisolariciresinol dehydrogenase (AHRD V3.3 *** A0A1U8ETA2_CAPAN),Pfam:PF13561
Solyc03g118630.3.1	-1.58037	0.00127497	0.00972231	transmembrane protein (AHRD V3.3 *** AT3G17950.1)
Solyc10g077050.2.1	-1.57883	1.40066e-05	0.000209595	S-acyltransferase (AHRD V3.3 *** A0A2G2VW55_CAPBA)
Solyc05g012680.3.1	-1.57278	2.85258e-07	6.7133e-06	DUF538 family protein (Protein of unknown function%2C DUF538) (AHRD V3.3 *** AT2G03350.1)
Solyc02g005310.3.1	-1.57232	0.00908699	0.0468334	Unknown protein
Solyc02g079300.3.1	-1.57226	0.00577825	0.0325721	Transcription factor jumonji (JmjC) domain-containing protein (AHRD V3.3 *** Q8VYB9_ARATH)
Solyc11g010440.3.1	-1.56692	0.000241754	0.00247244	GLABRA2 expression modulator (AHRD V3.3 *** A0A2G3CDH1_CAPCH)
Solyc05g024010.3.1	-1.56621	0.009318	0.0476458	Zinc finger protein CONSTANS-LIKE 15 (AHRD V3.3 *** A0A2G2VMU9_CAPBA)
Solyc05g006910.4.1	-1.56241	6.45117e-07	1.38784e-05	AMP deaminase (AHRD V3.3 *** A0A2G2VM22_CAPBA)
Solyc09g031590.4.1	-1.56088	0.000133516	0.00148327	Sorting nexin 2B (AHRD V3.3 *-* A0A1J3ET74_NOCCA)
Solyc09g010660.3.1	-1.55959	0.000921463	0.00750217	Core-2/I-branching beta-16-N-acetylglucosaminyltransferase family protein (AHRD V3.3 *** B6ST68_MAIZE)
Solyc07g056000.2.1	-1.5571	1.05185e-11	6.3479e-10	Xyloglucan endotransglucosylase/hydrolase (AHRD V3.3 *** Q43528_SOLLC)
Solyc03g124110.2.1	-1.54858	0.000544423	0.00481166	Dehydration-responsive element-binding transcription factor (AHRD V3.3 *** A0A1S6M2D0_9CARY)
Solyc08g007270.4.1	-1.54577	3.36561e-12	2.22179e-10	homeobox-leucine zipper protein HAT4-like (AHRD V3.3 *** A0A2I4G6W7_9ROSI)
Solyc03g083350.3.1	-1.54355	8.3007e-06	0.000134206	phosphatidylinositol 4-kinase gamma 4-like (AHRD V3.3 *** A0A2I4FK44_9ROSI)
Solyc11g011010.1.1	-1.54346	1.07965e-05	0.000167167	B-cell receptor-associated-like protein (AHRD V3.3 *** Q9FFJ0_ARATH)
Solyc02g070970.1.1	-1.53827	4.62219e-07	1.0358e-05	Chlorophyll a-b binding protein, chloroplastic (AHRD V3.3 *** A0A2G3A7J8_CAPAN)
Solyc07g049450.3.1	-1.53754	6.72559e-19	1.75692e-16	Protein disulfide-isomerase like 2-2 (AHRD V3.3 *** A0A2G3C063_CAPCH)
Solyc00g500256.1.1	-1.53742	0.00381253	0.0235845	NADH-ubiquinone oxidoreductase chain 5 (AHRD V3.3 *-* A0A1Y0B159_9LAMI)
Solyc04g016230.4.1	-1.53719	0.0090166	0.0465361	Glycosyltransferase (AHRD V3.3 *** A0A0A1WCD6_NICAT)
Solyc07g042160.3.1	-1.53506	0.00347959	0.021933	Pectin lyase-like superfamily protein (AHRD V3.3 *** A0A2U1LH94_ARTAN)
Solyc05g055980.4.1	-1.53448	0.00291437	0.0190126	Protein phosphatase 2c-like protein (AHRD V3.3 *** Q8S2S5_EUTHA)
Solyc05g018600.3.1	-1.52971	0.00605233	0.033928	Actin-related protein 6 (AHRD V3.3 *** A0A1U8GPF8_CAPAN)
Solyc01g079830.3.1	-1.5297	0.00715313	0.0387907	hypothetical protein (AHRD V3.3 *** AT5G19190.1)
Solyc07g052180.1.1	-1.52487	3.52318e-05	0.000469227	glycine-rich cell wall structural protein 1-like (AHRD V3.3 *-* XP_010324095.1)
Solyc09g066360.1.1	-1.5228	0.0007004	0.00597365	Ethylene Response Factor C.3
Solyc01g096880.4.1	-1.52253	1.46303e-06	2.86741e-05	Major facilitator superfamily protein (AHRD V3.3 *** A0A1P8AZ04_ARATH)
Solyc02g080160.4.1	-1.51757	2.47528e-09	9.52904e-08	Xyloglucan endotransglucosylase/hydrolase (AHRD V3.3 *** A0A2G2VBB5_CAPBA)
Solyc08g081455.1.1	-1.51754	2.90372e-14	3.06922e-12	Unknown protein
Solyc05g015310.3.1	-1.51286	1.23251e-12	8.9435e-11	Small ribosomal subunit biogenesis GTPase RsgA (AHRD V3.3 *** B2J3J5_NOSP7)
Solyc04g056640.1.1	-1.50849	0.00076	0.00637494	Leucine rich receptor kinase (AHRD V3.3 *** A0A2P5AMX7_TREOI)
Solyc07g032250.4.1	-1.507	1.20327e-05	0.000183511	nucleophosmin (AHRD V3.3 *** AT4G29520.1)
Solyc05g051340.3.1	-1.50688	0.00937904	0.0478797	Pentatricopeptide repeat-containing protein (AHRD V3.3 *** A0A2I0WS88_9ASPA)
Solyc02g089890.4.1	-1.50552	0.00199176	0.0140136	PQ-loop repeat family protein / transmembrane family protein (AHRD V3.3 *** Q94AH7_ARATH)
Solyc02g083430.1.1	-1.50392	0.000412108	0.00387644	ERD (Early-responsive to dehydration stress) family protein (AHRD V3.3 *-* A0A1P8AWL1_ARATH)
Solyc07g021550.3.1	-1.50079	0.00108007	0.00851665	Protein EFFECTOR OF TRANSCRIPTION 2 (AHRD V3.3 *** ET2_ARATH)
Solyc11g071270.2.1	-1.49844	0.00839398	0.0439429	target of Myb protein 1-like (AHRD V3.3 *** A0A2I4DXB2_9ROSI)
Solyc02g085145.1.1	-1.49556	0.00367113	0.0228786	Transcription factor RADIALIS (AHRD V3.3 *** A0A1U8FSL3_CAPAN)
Solyc04g017720.3.1	-1.4951	8.72578e-07	1.81938e-05	Gibberellin regulated protein (AHRD V3.3 *** A0A2U1PE48_ARTAN)
Solyc02g091240.1.1	-1.49364	6.20127e-10	2.75234e-08	Auxin efflux carrier (AHRD V3.3 *** A0A2U1QP17_ARTAN)
Solyc07g048010.4.1	-1.49345	0.00501682	0.0291697	Thymidylate kinase (AHRD V3.3 *** A0A1J3DB39_NOCCA)
Solyc08g081070.3.1	-1.49131	0.000214908	0.00224048	Mitochondrial substrate carrier family protein (AHRD V3.3 *** F4JP07_ARATH)
Solyc02g150126.1.1	-1.48676	9.15493e-19	2.3251e-16	Unknown protein
Solyc01g079780.3.1	-1.48586	6.9446e-18	1.52999e-15	Glycoprotein membrane GPI-anchored (AHRD V3.3 *** Q9ZVL0_ARATH)
Solyc01g090380.3.1	-1.4845	0.00167723	0.012185	hypothetical protein (AHRD V3.3 *** AT2G44850.3)
Solyc02g083500.3.1	-1.4831	2.85214e-15	3.75211e-13	cell wall integrity/stress response component (AHRD V3.3 *** AT5G66090.1)
Solyc08g067830.3.1	-1.48055	7.90518e-07	1.66537e-05	Transmembrane protein 18 (AHRD V3.3 *** A0A200QPB6_9MAGN)
Solyc10g082064.1.1	-1.47767	7.1914e-18	1.5655e-15	furry (AHRD V3.3 *** AT5G08060.1)
Solyc07g032490.3.1	-1.47678	3.5253e-09	1.31291e-07	Major facilitator superfamily protein (AHRD V3.3 *** A0A1P8AZ04_ARATH)
Solyc11g039890.2.1	-1.47567	0.00497238	0.0289939	Nucleoporin (DUF3414) (AHRD V3.3 *-* F4JUG3_ARATH)
Solyc02g069810.3.1	-1.47347	0.00296721	0.0192953	Nucleic acid binding protein (AHRD V3.3 *** A0A2K3PHJ0_TRIPR)
Solyc12g098810.2.1	-1.4729	7.67807e-18	1.65178e-15	Chitinase-like protein (AHRD V3.3 *** Q6JX04_GOSHI)
Solyc03g121900.1.1	-1.47222	0.00044289	0.00408122	Bifunctional inhibitor/plant lipid transfer protein/seed storage helical domain containing protein (AHRD V3.3 *** A0A2P5DNS6_PARAD)
Solyc02g094590.3.1	-1.46656	0.000719164	0.00609955	Transcription-repair-coupling factor (AHRD V3.3 *** A0A1J3HTX1_NOCCA)
Solyc01g098630.3.1	-1.46554	0.000318891	0.00312835	Mitochondrial inner membrane translocase complex, subunit Tim44-related protein (AHRD V3.3 *** B3H4A1_ARATH)
Solyc01g091090.4.1	-1.46325	0.0037643	0.0233494	Tubulin-folding cofactor D (AHRD V3.3 *-* A0A2G2XNQ5_CAPBA)
Solyc03g093080.3.1	-1.45956	8.87876e-06	0.000142294	Xyloglucan endotransglucosylase/hydrolase (AHRD V3.3 *** Q6RHY0_SOLLC)
Solyc11g070060.2.1	-1.45368	3.77851e-05	0.000497078	hypothetical protein (AHRD V3.3 *** AT4G32930.1)
Solyc12g062800.1.1	-1.45361	0.000273929	0.00276134	Unknown protein
Solyc03g113930.3.1	-1.45152	9.5141e-40	1.73975e-35	22.0 kDa class IV heat shock protein (AHRD V3.3 *** A0A2G3ATG3_CAPCH)
Solyc06g065610.3.1	-1.45147	0.00113776	0.00889488	Protein phosphatase 2C (AHRD V3.3 *** Q8S8Z1_MESCR)
Solyc10g018550.1.1	-1.44891	0.000179976	0.0019325	Ribonuclease h protein (AHRD V3.3 *** A0A2U1KZV0_ARTAN)
Solyc04g064830.4.1	-1.44731	0.00799699	0.042325	Transcriptional factor B3 family protein (AHRD V3.3 *** A0A2H1ZEQ2_ARATH)
Solyc07g053580.3.1	-1.44719	0.00481153	0.0282451	S-adenosyl-L-methionine-dependent methyltransferase superfamily protein (AHRD V3.3 *** B6UDN2_MAIZE)
Solyc01g008340.3.1	-1.44324	0.000385809	0.00368018	L19 ribosomal protein
Solyc03g007510.4.1	-1.44267	0.00122183	0.00939542	HAT transposon superfamily (AHRD V3.3 *** A0A2U1Q846_ARTAN)
Solyc06g049090.3.1	-1.44213	1.62241e-06	3.13941e-05	tRNA (guanine(26)-N(2))-dimethyltransferase (AHRD V3.3 *** A0A2I4ER74_9ROSI)
Solyc05g050940.4.1	-1.43996	0.00623984	0.0347977	tRNA N6-adenosine threonylcarbamoyltransferase (AHRD V3.3 *** A0A248JMK1_9PROT)
Solyc11g069690.3.1	-1.43746	0.000178021	0.00191375	Protein disulfide-isomerase 5-1 (AHRD V3.3 *** A0A1U8EZC9_CAPAN)
Solyc12g097010.1.1	-1.4363	2.5891e-08	7.66087e-07	Disease resistance protein (TIR-NBS-LRR class) (AHRD V3.3 *** F4KIC7_ARATH)
Solyc09g008070.4.1	-1.42735	0.00256064	0.0171328	Cell division cycle protein 48-like protein (AHRD V3.3 *** A0A2G3BJ43_CAPCH)
Solyc06g071670.1.1	-1.42646	1.19383e-26	1.09152e-23	S-adenosyl-L-methionine-dependent methyltransferases superfamily protein (AHRD V3.3 *** Q9FML3_ARATH)
Solyc07g041780.3.1	-1.42583	8.62873e-06	0.000138529	OBP3-responsive protein 4 (ORG4) (AHRD V3.3 *** Q8VY85_ARATH)
Solyc12g006250.3.1	-1.42471	0.00682065	0.0373756	Vesicle transport protein (AHRD V3.3 *** A0A2G3BN67_CAPCH)
Solyc08g074720.2.1	-1.42404	5.65919e-18	1.27758e-15	Late embryogenesis abundant protein Lea5 (AHRD V3.3 *** A0A1J3FNN3_NOCCA)
Solyc07g041235.1.1	-1.42313	0.00463377	0.0274573	Unknown protein
Solyc05g005230.3.1	-1.42281	5.12682e-06	8.75431e-05	Plant protein 1589 of Uncharacterized protein function (AHRD V3.3 *** A0A061EE06_THECC)
Solyc08g063010.3.1	-1.42126	0.00127851	0.00974527	Mitochondrial carrier protein (AHRD V3.3 *** A0A200QCQ6_9MAGN)
Solyc09g065650.3.1	-1.42008	2.10486e-05	0.000297847	Protein phosphatase 2C family protein (AHRD V3.3 *** A0A2U1QFD7_ARTAN)
Solyc05g051220.3.1	-1.41905	8.07435e-06	0.000131126	Potassium channel GORK (AHRD V3.3 *** A0A1U8GYE0_CAPAN)
Solyc05g014230.3.1	-1.41886	0.00843973	0.0441192	RING/U-box superfamily protein (AHRD V3.3 *** A0A2U1NQ36_ARTAN)
Solyc03g096290.3.1	-1.41875	6.2927e-10	2.77943e-08	plasma membrane intrinsic protein 1.7
Solyc10g047110.2.1	-1.41721	1.59575e-07	4.02482e-06	Peroxidase (AHRD V3.3 *** K4CZX5_SOLLC)
Solyc04g010140.1.1	-1.41024	0.00687007	0.0375901	Unknown protein
Solyc02g081400.3.1	-1.40483	1.12606e-38	1.02956e-34	Protein DJ-1 (AHRD V3.3 *** A0A2U1PKX3_ARTAN)
Solyc04g082720.3.1	-1.40302	2.08352e-29	6.34986e-26	Alpha-crystallin domain-containing protein 22.3 (AHRD V3.3 *** A0A1U8GRL0_CAPAN)
Solyc06g075650.3.1	-1.40242	2.44528e-07	5.87019e-06	tonoplast intrinsic protein 1.2
Solyc06g036120.3.1	-1.4016	7.95895e-14	7.58007e-12	Unknown protein
Solyc07g063170.1.1	-1.4007	0.000107461	0.00122815	Unknown protein
Solyc02g080670.3.1	-1.40051	0.00049224	0.00444061	L-ascorbate oxidase-like protein (AHRD V3.3 *** A0A1U8FN33_CAPAN)
Solyc04g074110.4.1	-1.3995	1.16206e-08	3.79455e-07	Carbohydrate esterase, putative (DUF303) (AHRD V3.3 *** Q0WNN6_ARATH)
Solyc06g066700.1.1	-1.39928	8.17343e-15	9.96395e-13	serine-rich protein-like protein (AHRD V3.3 --* AT3G13227.1)
Solyc04g080050.4.1	-1.39688	0.00466482	0.0275916	EXS (AHRD V3.3 *** A0A200R094_9MAGN)
Solyc03g123410.1.1	-1.39653	9.11253e-06	0.00014515	Germin-like protein 1 (AHRD V3.3 *** A0A1U8G802_CAPAN)
Solyc01g090590.3.1	-1.3953	2.04634e-09	8.01273e-08	Alpha/beta-Hydrolases superfamily protein (AHRD V3.3 *** A0A2U1P0W9_ARTAN)
Solyc01g111310.3.1	-1.39429	0.00736232	0.039608	SlLAX2
Solyc03g112140.4.1	-1.39199	2.9282e-13	2.44498e-11	MAP kinase kinase kinase 27
Solyc10g051090.3.1	-1.39013	1.54725e-08	4.87811e-07	Serine/threonine-protein phosphatase 7 long form-like protein (AHRD V3.3 *-* A0A1J3DHF8_NOCCA)
Solyc08g007890.3.1	-1.38946	2.84759e-13	2.38858e-11	Aldehyde dehydrogenase family 2 member mitochondrial-like (AHRD V3.3 *-* A0A2K3PGY0_TRIPR)
Solyc12g009200.2.1	-1.38769	8.12447e-21	3.30142e-18	Chlorophyll a-b binding protein, chloroplastic (AHRD V3.3 *** A0A2G3BP51_CAPCH)
Solyc05g006290.2.1	-1.38333	1.21611e-05	0.000185315	F-box domain, Leucine-rich repeat domain, L domain-like protein (AHRD V3.3 *** A0A2U1LZM8_ARTAN)
Solyc02g069170.3.1	-1.38152	0.00320456	0.0205537	Transcription initiation factor TFIID subunit 8 (AHRD V3.3 *** A0A1J3F703_NOCCA)
Solyc08g067160.3.1	-1.37989	0.00224218	0.015437	Alpha/beta-Hydrolases superfamily protein (AHRD V3.3 *** A0A2U1QI56_ARTAN)
Solyc05g009120.3.1	-1.37918	0.00710564	0.0385903	Core-2 i-branching beta-n-acetylglucosaminyltransferase family protein (AHRD V3.3 *** A0A2K3MN76_TRIPR)
Solyc08g016770.4.1	-1.37886	4.25974e-08	1.20953e-06	Serine decarboxylase (AHRD V3.3 *** A0A1U8F8Y3_CAPAN)
Solyc02g069670.4.1	-1.37874	0.00547902	0.0312896	alpha-glucosidase (AHRD V3.3 *** A0A2I4FA71_9ROSI)
Solyc10g079690.2.1	-1.37667	0.00283753	0.0186644	Unknown protein
Solyc09g031940.1.1	-1.37532	0.000282981	0.00283073	protein RETICULATA-RELATED 3, chloroplastic-like (AHRD V3.3 *** A0A2I4E4T7_9ROSI)
Solyc12g008450.2.1	-1.37461	0.000680491	0.00583255	Initiator tRNA phosphoribosyl transferase (AHRD V3.3 *** A0A200QDS0_9MAGN)
Solyc06g060940.2.1	-1.37088	0.000361995	0.00348759	GATA transcription factor 26 (AHRD V3.3 *** A0A2G3DC77_CAPCH)
Solyc09g082810.3.1	-1.36877	0.000119437	0.00134899	Unknown protein
Solyc01g014480.3.1	-1.36746	0.00359329	0.0225024	ETHYLENE INSENSITIVE 3-like 3 protein (AHRD V3.3 *** A0A2G3AJ97_CAPAN)
Solyc04g081590.4.1	-1.36513	0.0070534	0.0383596	Receptor protein kinase (AHRD V3.3 *** A0A2R6R3P4_ACTCH)
Solyc11g072480.2.1	-1.364	5.46768e-05	0.000690007	Tetraspanin-3 (AHRD V3.3 *** A0A2G3BA66_CAPCH)
Solyc05g055630.3.1	-1.36244	2.03989e-06	3.82579e-05	S-acyltransferase (AHRD V3.3 *** A0A1U8GRR7_CAPAN)
Solyc05g008120.4.1	-1.36016	5.52732e-28	9.18842e-25	DnaJ-like protein subfamily B member 6 (AHRD V3.3 *-* A0A2G3B5R9_CAPCH)
Solyc06g062980.3.1	-1.35964	6.2489e-07	1.35228e-05	U6 snRNA-associated Sm-like protein LSm1 (AHRD V3.3 *** A0A2G3C8I8_CAPCH)
Solyc01g079610.3.1	-1.35758	8.90651e-13	6.64753e-11	DnaJ protein ERDJ3B (AHRD V3.3 *** A0A2G2Z6I0_CAPAN)
Solyc10g054870.3.1	-1.35622	2.60381e-19	7.19883e-17	Triosephosphate isomerase (AHRD V3.3 *** B6UG30_MAIZE)
Solyc11g020330.1.1	-1.35506	5.92228e-25	4.16519e-22	leer-sHSP small heat shock protein
Solyc01g079590.3.1	-1.3541	1.10794e-24	6.98611e-22	Late embryogenesis abundant protein (LEA) family protein (AHRD V3.3 *** F4IYB7_ARATH)
Solyc09g007070.1.1	-1.35371	0.0071126	0.0386167	Complex 1 LYR protein (AHRD V3.3 *** A0A200QVT1_9MAGN)
Solyc10g006900.3.1	-1.35048	1.11595e-13	1.00523e-11	light dependent NADH:protochlorophyllide oxidoreductase 3 s2
Solyc04g082270.3.1	-1.34628	4.29703e-10	1.95949e-08	DUF241 domain-containing protein (AHRD V3.3 *** A0A1Q3B6H2_CEPFO)
Solyc05g007910.3.1	-1.34559	2.6935e-10	1.28264e-08	50S ribosomal protein L18, chloroplastic (AHRD V3.3 *** A0A1J3I4E4_NOCCA)
Solyc03g114040.3.1	-1.34452	0.000779526	0.00651184	Protein PRD1 (AHRD V3.3 *** A0A2G3CYP2_CAPCH)
Solyc10g055630.2.1	-1.34249	7.05734e-24	4.03283e-21	plasma membrane intrinsic protein 2.9
Solyc07g063930.4.1	-1.34007	6.97899e-06	0.000114558	Organic cation/carnitine transporter 4 (AHRD V3.3 *-* A0A2G2WG88_CAPBA)
Solyc06g083040.3.1	-1.33693	9.84795e-16	1.40687e-13	wound-inducible carboxypeptidase
Solyc04g008650.4.1	-1.33517	0.00178073	0.0127695	Inactive leucine-rich repeat receptor-like serinethreonine-protein kinase (AHRD V3.3 *** A0A314KSQ6_NICAT)
Solyc01g067400.3.1	-1.33337	0.000796447	0.00662594	Serine/threonine-protein kinase PBS1 (AHRD V3.3 *** A0A2G2XQZ3_CAPBA)
Solyc02g092790.3.1	-1.33139	3.48407e-17	6.77763e-15	Arabinogalactan (AHRD V3.3 *-* Q43719_SOLLC)
Solyc02g092650.3.1	-1.33135	6.24026e-06	0.00010421	Unknown protein
Solyc12g017240.2.1	-1.32841	1.43406e-05	0.000213892	xyloglucan endo-transglycosylase B1
Solyc10g082030.2.1	-1.32718	9.95766e-27	9.58346e-24	Peroxiredoxin (AHRD V3.3 *** Q9FE12_PHAVU)
Solyc07g055870.4.1	-1.32665	1.432e-09	5.89764e-08	MAP kinase kinase kinase 58
Solyc06g062990.3.1	-1.32572	0.00545571	0.0311955	Exocyst subunit Exo70 family protein (AHRD V3.3 *** A0A1U8H4Y9_CAPAN)
Solyc01g011030.3.1	-1.32388	0.00028122	0.0028162	RING/U-box superfamily protein (AHRD V3.3 *** A0A2K3MXG0_TRIPR)
Solyc07g009380.4.1	-1.32274	2.22537e-13	1.89469e-11	xyloglucan endotransglucosylase-hydrolase 2
Solyc04g074410.2.1	-1.32157	2.27237e-14	2.47043e-12	Protein EXORDIUM-like 1 (AHRD V3.3 *** A0A2G2ZQI6_CAPAN)
Solyc11g005140.1.1	-1.32075	0.00723971	0.0391441	Pentatricopeptide repeat (AHRD V3.3 *** A0A200QJH1_9MAGN)
Solyc01g088530.2.1	-1.31979	0.00419007	0.0254943	hypothetical protein (AHRD V3.3 *** AT2G44600.1)
Solyc11g066390.2.1	-1.31939	7.75539e-07	1.64138e-05	superoxide dismutase 3
Solyc01g111010.4.1	-1.3191	0.00985263	0.0496111	X-intrinsic protein 1.6
Solyc08g066740.3.1	-1.31882	2.83874e-07	6.69796e-06	Early nodulin-like protein 1 (AHRD V3.3 *** A0A1J3CHP6_NOCCA)
Solyc02g069710.4.1	-1.31697	0.000543168	0.00480289	Cation/calcium exchanger 4 (AHRD V3.3 *** A0A2G3A6Q7_CAPAN)
Solyc12g042540.1.1	-1.31454	0.00177033	0.0127149	Ephrin-A3 protein (AHRD V3.3 *** Q94K72_ARATH)
Solyc06g064550.3.1	-1.31425	2.27356e-06	4.21218e-05	Aspartokinase-homoserine dehydrogenase (AHRD V3.3 *** O63067_SOYBN)
Solyc09g097960.3.1	-1.31199	0.000339931	0.00329935	NAD(P)-linked oxidoreductase, aldo/keto reductase family protein (AHRD V3.3 *** A0A1Y1HY98_KLENI)
Solyc11g032050.2.1	-1.31051	0.00495984	0.0289393	GDSL esterase/lipase (AHRD V3.3 *** A0A2G3CP09_CAPCH)
Solyc06g009510.1.1	-1.31019	1.94221e-09	7.72071e-08	transcription factor UPBEAT1 (AHRD V3.3 *-* A0A2I4GEI3_9ROSI)
Solyc09g075470.2.1	-1.30879	1.146e-16	2.05741e-14	DnaJ-like protein subfamily B member 6 (AHRD V3.3 *** A0A2G2W0L3_CAPBA)
Solyc01g065490.4.1	-1.304	1.37138e-19	4.17951e-17	NAD(P)-linked oxidoreductase, aldo/keto reductase family protein (AHRD V3.3 *** A0A1Y1HY98_KLENI)
Solyc03g116700.4.1	-1.30338	5.41841e-06	9.16569e-05	Umecyanin (AHRD V3.3 *** A0A2G3B789_CAPCH)
Solyc11g065760.2.1	-1.30165	0.00416566	0.0253742	TK1-like deoxyribonucleoside kinase
Solyc05g008040.4.1	-1.3013	0.00180132	0.012902	ATP-dependent DNA helicase RecG (AHRD V3.3 *** A0A1J3J3M9_NOCCA)
Solyc08g068060.3.1	-1.30057	0.000425984	0.00396616	transmembrane protein (AHRD V3.3 *** AT4G32680.1)
Solyc01g056850.3.1	-1.29739	1.02413e-05	0.000160336	CTP synthase (AHRD V3.3 *** A0A2G2XFG8_CAPBA)
Solyc11g066410.2.1	-1.29717	6.09437e-20	2.06373e-17	50S ribosomal protein L9 (AHRD V3.3 *** B4FU53_MAIZE)
Solyc04g074750.3.1	-1.29404	9.40496e-07	1.93235e-05	RNA-binding protein CP33, chloroplastic (AHRD V3.3 *** A0A1J3ILT8_NOCCA)
Solyc04g072510.3.1	-1.29184	0.000242943	0.0024832	Mitochondrial transcription termination factor family protein (AHRD V3.3 *** B4FH48_MAIZE)
Solyc12g056640.2.1	-1.28884	1.94517e-06	3.66695e-05	UDP-galactose transporter 2 (AHRD V3.3 *** A0A2G3CN83_CAPCH)
Solyc02g068110.4.1	-1.28865	5.60871e-35	2.56402e-31	Transcription and mRNA export factor ENY2 (AHRD V3.3 *** A0A2G3D3N3_CAPCH)
Solyc12g010890.2.1	-1.28716	2.72211e-09	1.04135e-07	trihelix transcription factor ASIL1-like (AHRD V3.3 *** A0A2I4FFS5_9ROSI)
Solyc10g007200.3.1	-1.28656	0.000191459	0.0020284	Hexosyltransferase (AHRD V3.3 *** A0A2G3BCF8_CAPCH)
Solyc09g059950.3.1	-1.28423	8.38981e-14	7.90804e-12	amino acid-ligase (AHRD V3.3 *** AT3G07150.1)
Solyc02g069120.3.1	-1.28402	1.09018e-16	1.99351e-14	zinc finger protein ZPR1-like (AHRD V3.3 *** A0A2I4F7X7_9ROSI)
Solyc07g041720.1.1	-1.28267	6.56984e-05	0.000808453	Germin-like protein (AHRD V3.3 *** S8E4K0_9LAMI)
Solyc02g089950.2.1	-1.28242	0.0032205	0.0206342	BTB/POZ domain-containing protein (AHRD V3.3 *** A0A2G3D909_CAPCH)
Solyc12g017460.1.1	-1.28212	0.00547565	0.0312802	GDSL esterase/lipase At5g03980-like (AHRD V3.3 *** A0A1S3YRJ5_TOBAC)
Solyc01g091310.3.1	-1.2812	2.93533e-06	5.30202e-05	Transducin/WD40 repeat-like superfamily protein (AHRD V3.3 *** A0A2U1L635_ARTAN)
Solyc12g015640.2.1	-1.28025	0.00285871	0.0187699	Mitochondrial transcription termination factor family protein (AHRD V3.3 *** A0A1P8B9X1_ARATH)
Solyc01g074010.4.1	-1.27768	0.000256979	0.00260772	Protein kinase domain (AHRD V3.3 *** A0A200RDU7_9MAGN)
Solyc07g056390.4.1	-1.27471	6.77345e-05	0.000826831	Endoplasmic reticulum oxidoreductin-1 (AHRD V3.3 *** A0A2G2WEL6_CAPBA)
Solyc10g083590.2.1	-1.26951	0.00120251	0.00927812	Polyadenylation and cleavage factor-like protein 4 (AHRD V3.3 *** A0A1J3JME1_NOCCA)
Solyc05g014650.2.1	-1.26836	1.09709e-09	4.60125e-08	Ribosomal silencing factor RsfS (AHRD V3.3 *-* A0A2G2XZV2_CAPAN)
Solyc01g112290.4.1	-1.26799	8.82979e-25	5.76648e-22	Glutamate--tRNA ligase, chloroplastic/mitochondrial (AHRD V3.3 *** A0A2G3BWC0_CAPCH)
Solyc04g011460.3.1	-1.26737	0.00437739	0.0262701	FYD (AHRD V3.3 *** AT3G12570.4)
Solyc06g084060.3.1	-1.26711	0.000133674	0.00148413	F-box/LRR-repeat protein 17 (AHRD V3.3 *** A0A2G2WN42_CAPBA)
Solyc03g117560.3.1	-1.26682	9.52222e-06	0.000150626	Plastocyanin-like (AHRD V3.3 *** A0A200PSX2_9MAGN)
Solyc01g104250.4.1	-1.26308	0.000106685	0.00122157	Rhomboid-like protein (AHRD V3.3 *** A0A2I0WGB8_9ASPA)
Solyc03g034010.3.1	-1.26301	2.76189e-16	4.59127e-14	RING-type E3 ubiquitin transferase (AHRD V3.3 *-* A0A2G3CL67_CAPCH)
Solyc12g008580.2.1	-1.26205	0.00366232	0.0228486	Glucan endo-1,3-beta-glucosidase 12 (AHRD V3.3 *** A0A2G2X3S4_CAPBA)
Solyc00g500125.1.1	-1.26204	0.00474452	0.0279595	Protein TIC 214 (AHRD V3.3 *** TI214_SOLTU)
Solyc11g006540.2.1	-1.26045	1.5829e-12	1.13066e-10	FAD/NAD(P)-binding oxidoreductase family protein (AHRD V3.3 *** Q9C574_ARATH)
Solyc06g065530.4.1	-1.25887	0.00475161	0.0279832	GDSL esterase/lipase (AHRD V3.3 *** A0A314ZSH7_PRUYE)
Solyc08g075300.4.1	-1.25884	0.00278726	0.0183866	Protein decapping 5 (AHRD V3.3 *-* A0A2G3B6L4_CAPCH)
Solyc10g080470.1.1	-1.25852	0.00419802	0.0255021	hypothetical protein (AHRD V3.3 *** AT3G57990.1)
Solyc03g007000.4.1	-1.2566	0.00012236	0.00137691	Peptidase M48 (AHRD V3.3 *** A0A200PMQ6_9MAGN)
Solyc08g078990.3.1	-1.25572	0.000668031	0.0057648	Phosphatidic acid phosphatase type 2/haloperoxidase (AHRD V3.3 *** A0A200PS40_9MAGN)
Solyc10g080020.3.1	-1.25459	0.00115625	0.00899709	F-box/LRR-repeat protein At5g63520-like (AHRD V3.3 *** A0A2I4FAV8_9ROSI)
Solyc01g056780.3.1	-1.25376	1.99639e-16	3.38019e-14	50S ribosomal protein L34 (AHRD V3.3 *** A0A1U8FLP5_CAPAN)
Solyc06g053370.3.1	-1.25343	0.0004372	0.00404177	Rhomboid protein (AHRD V3.3 *** E5GC88_CUCME)
Solyc06g051300.3.1	-1.25311	0.000361614	0.00348575	Chromosome transmission fidelity-like protein (AHRD V3.3 *** F4KEU4_ARATH)
Solyc07g055400.2.1	-1.25236	2.56073e-10	1.23225e-08	Lectin-domain receptor-like kinase (AHRD V3.3 *-* G4XXY5_NICAT)
Solyc08g005570.4.1	-1.24856	0.00232394	0.0158831	Root UVB sensitive family (AHRD V3.3 *** A0A2U1QLM3_ARTAN)
Solyc12g057160.1.1	-1.24694	1.70288e-06	3.25719e-05	Unknown protein
Solyc10g081100.3.1	-1.24678	6.40557e-15	8.02276e-13	50S ribosomal protein 5, chloroplastic (AHRD V3.3 *** A0A2G2VVL1_CAPBA)
Solyc06g050760.1.1	-1.24596	1.38416e-07	3.54493e-06	Wound-induced protein 1 (AHRD V3.3 *** A0A2G2Z8C8_CAPAN)
Solyc07g021620.1.1	-1.24345	0.00166131	0.0121079	Pentatricopeptide repeat (AHRD V3.3 *** A0A200QLP1_9MAGN)
Solyc09g091230.4.1	-1.24275	4.29245e-05	0.000557074	Core-2/I-branching beta-1,6-N-acetylglucosaminyltransferase family protein (AHRD V3.3 *** Q9LIQ3_ARATH)
Solyc01g087540.4.1	-1.2421	3.41869e-06	6.08114e-05	DUF642 domain-containing protein (AHRD V3.3 *** A0A1Q3AUQ6_CEPFO)
Solyc11g012480.3.1	-1.24159	0.00508496	0.0294812	Thymidine kinase (AHRD V3.3 *** A0A1U8EY32_CAPAN)
Solyc06g051200.3.1	-1.24156	1.08875e-21	5.38077e-19	50S ribosomal protein L3 (AHRD V3.3 *** A0A2G2YWM5_CAPAN)
Solyc02g089680.4.1	-1.24143	5.9079e-09	2.08959e-07	Protein trichome birefringence-like 19 (AHRD V3.3 *** A0A2G3ABU9_CAPAN)
Solyc01g110270.3.1	-1.23978	6.19165e-25	4.19335e-22	RNA-binding CRS1 / YhbY (CRM) domain protein (AHRD V3.3 *-* F4JV86_ARATH)
Solyc01g067120.4.1	-1.23543	1.82781e-08	5.61737e-07	cullin-1-like (AHRD V3.3 *-* A0A2I4G9U1_9ROSI)
Solyc06g007760.4.1	-1.23379	8.31561e-15	1.00702e-12	Ycf54-like protein (AHRD V3.3 *** B4FED9_MAIZE)
Solyc08g074480.1.1	-1.23373	2.17489e-07	5.29516e-06	Bifunctional inhibitor/lipid-transfer protein/seed storage 2S albumin superfamily protein (AHRD V3.3 *** A0A2U1PU47_ARTAN)
Solyc06g065360.3.1	-1.23105	0.000258256	0.00261778	Erythroid differentiation-related factor 1-like protein (AHRD V3.3 *** Q5N730_ORYSJ)
Solyc12g094420.2.1	-1.22953	8.74511e-09	2.96135e-07	Mechanosensitive ion channel protein (AHRD V3.3 *** A0A2G3DGW3_CAPCH)
Solyc01g014140.3.1	-1.22853	0.00332727	0.0211552	receptor-like protein 12 (AHRD V3.3 *-* A0A2G2YW48_CAPAN)
Solyc00g022100.1.1	-1.22804	0.0023463	0.0159912	Ribosomal protein L10 (AHRD V3.3 *** E0D3E6_SOLLC)
Solyc02g063150.3.1	-1.22801	3.50713e-11	1.93167e-09	RuBP carboxylase small subunit
Solyc02g089350.3.1	-1.22567	4.63288e-05	0.000596598	Gibberellin regulated protein (AHRD V3.3 *** A0A2U1PE48_ARTAN)
Solyc10g007720.4.1	-1.22201	0.0054021	0.0309664	Conserved oligomeric Golgi complex subunit 5 (AHRD V3.3 *** A0A200R154_9MAGN)
Solyc10g008600.3.1	-1.22144	0.000156399	0.00170334	embryo defective 1923 (AHRD V3.3 *** AT4G28210.1)
Solyc03g118120.3.1	-1.22101	1.17656e-10	5.9106e-09	Transferring glycosyl group transferase (AHRD V3.3 *** A0A2K3L539_TRIPR)
Solyc06g082480.3.1	-1.22014	7.6063e-05	0.000915058	PAP/OAS1 substrate-binding domain superfamily (AHRD V3.3 *-* F4J4G2_ARATH)
Solyc05g010720.4.1	-1.21953	1.73298e-22	9.05406e-20	Enoyl-CoA delta isomerase 1, peroxisomal (AHRD V3.3 *** A0A2G3B729_CAPCH)
Solyc03g120740.1.1	-1.2187	1.53489e-06	2.98584e-05	hypothetical protein (AHRD V3.3 *** AT1G15230.1)
Solyc03g095500.3.1	-1.21643	7.99045e-05	0.000954989	Thioredoxin (AHRD V3.3 *** A0A2G2X4X1_CAPBA)
Solyc03g114580.4.1	-1.21279	9.90672e-07	2.02633e-05	Uridine kinase (AHRD V3.3 *** A0A200QPY2_9MAGN)
Solyc12g017450.2.1	-1.20992	0.00150468	0.0111453	Ubiquitin-specific protease family C19 protein (AHRD V3.3 *** A0A2K3NKS0_TRIPR)
Solyc04g071960.3.1	-1.20698	4.6841e-05	0.000601499	NAD(P)-binding Rossmann-fold superfamily protein (AHRD V3.3 *** A0A2U1QER6_ARTAN),Pfam:PF13561
Solyc08g077960.3.1	-1.20507	0.000118896	0.00134372	GATA transcription factor 26 (AHRD V3.3 *** A0A2G2XLP4_CAPBA)
Solyc01g091530.4.1	-1.20435	1.45112e-17	2.94835e-15	Fasciclin-like arabinogalactan protein (AHRD V3.3 *** E3WHD6_9ROSI)
Solyc01g067510.3.1	-1.20211	9.82166e-10	4.17672e-08	receptor-like protein kinase FERONIA (AHRD V3.3 *** A0A2I4F2T3_9ROSI)
Solyc04g077130.1.1	-1.20182	3.29813e-07	7.6438e-06	50S ribosomal protein 6, chloroplastic (AHRD V3.3 *** A0A2G3CPG8_CAPCH)
Solyc01g094170.3.1	-1.20139	8.14912e-06	0.000131988	Digalactosyldiacylglycerol synthase 2, chloroplastic (AHRD V3.3 *** A0A1U8E3X1_CAPAN)
Solyc06g054090.2.1	-1.19997	0.00253038	0.01698	N-acetyltransferase (AHRD V3.3 *** A0A2N9Z4V7_PAEPO)
Solyc01g090965.1.1	-1.19861	6.76848e-09	2.33967e-07	Bifunctional inhibitor/lipid-transfer protein/seed storage 2S albumin superfamily protein (AHRD V3.3 *** Q9FJS1_ARATH)
Solyc08g061630.3.1	-1.19801	1.55502e-15	2.13798e-13	YGGT family protein (AHRD V3.3 *** F8WLD3_CITUN)
Solyc09g065610.2.1	-1.19422	1.10002e-28	2.51438e-25	Bax inhibitor-1 family protein (AHRD V3.3 *-* A0A2U1MW73_ARTAN)
Solyc05g006430.3.1	-1.19236	0.00916343	0.047121	Formin-like protein (AHRD V3.3 *** A0A2G2VM92_CAPBA)
Solyc05g006285.1.1	-1.19184	0.00914285	0.0470417	Unknown protein
Solyc06g068860.3.1	-1.19114	0.00105766	0.008358	Alpha-mannosidase (AHRD V3.3 *** E0XN34_SOLLC)
Solyc12g010570.1.1	-1.18951	0.00365767	0.0228273	Tetraspanin (AHRD V3.3 *** A0A200Q8V3_9MAGN)
Solyc04g010280.2.1	-1.18881	0.00436904	0.0262336	Unknown protein
Solyc06g065390.4.1	-1.18751	1.2889e-08	4.13488e-07	50S ribosomal protein L21, chloroplastic (AHRD V3.3 *** A0A1U8GUE9_CAPAN)
Solyc03g120380.3.1	-1.18686	4.53655e-05	0.000585017	auxin-regulated IAA19
Solyc11g068900.1.1	-1.18661	2.31465e-05	0.00032285	Late embryogenesis abundant hydroxyproline-rich glycoprotein (AHRD V3.3 *-* A0A2K3L117_TRIPR)
Solyc03g082890.3.1	-1.18643	1.99541e-14	2.22488e-12	Thylakoid lumenal 17.4 kDa protein, chloroplastic (AHRD V3.3 *** A0A2G3CX11_CAPCH)
Solyc02g091350.4.1	-1.1861	7.21506e-06	0.00011801	Glycosyltransferase (AHRD V3.3 *** A0A2U1LPX5_ARTAN)
Solyc04g074640.4.1	-1.18296	4.31832e-16	6.92673e-14	Ascorbate peroxidase (AHRD V3.3 *** A0A0K2SS60_CITUN)
Solyc02g068760.4.1	-1.18164	0.000116041	0.00131388	Pentatricopeptide repeat-containing protein (AHRD V3.3 *** A0A2G3A6F7_CAPAN)
Solyc06g007890.3.1	-1.18106	6.63538e-05	0.00081378	Gibberellin regulated protein (AHRD V3.3 *** A0A2U1LHI0_ARTAN)
Solyc07g054100.3.1	-1.17987	1.43989e-10	7.13545e-09	Pentatricopeptide repeat (AHRD V3.3 *** A0A200QWW0_9MAGN)
Solyc08g028970.3.1	-1.17914	1.12095e-15	1.58897e-13	Vacuolar iron transporter-like protein 3 (AHRD V3.3 *-* A0A2G3AWL9_CAPCH)
Solyc05g008130.4.1	-1.17849	1.10945e-06	2.23429e-05	Unknown protein
Solyc06g069820.4.1	-1.17837	2.28878e-13	1.93763e-11	DUF674 family protein (AHRD V3.3 *** A0A2K3NL09_TRIPR)
Solyc07g049210.3.1	-1.17786	5.83697e-08	1.61965e-06	PHD finger family protein / bromo-adjacent homology (BAH) domain-containing protein (AHRD V3.3 *** A0A2U1QHU8_ARTAN)
Solyc07g042820.3.1	-1.17583	0.00441195	0.0263909	Chloroplast envelope membrane protein (AHRD V3.3 *-* A0A200R9H0_9MAGN)
Solyc05g007150.4.1	-1.1732	1.3233e-06	2.61598e-05	UDP-galactose/UDP-glucose transporter 3 (AHRD V3.3 *** A0A2G2YDQ6_CAPAN)
Solyc03g005780.3.1	-1.1727	1.04173e-05	0.000162674	Chlorophyll a-b binding protein, chloroplastic (AHRD V3.3 *** A0A2G2W7Q4_CAPBA)
Solyc01g006400.4.1	-1.17163	1.19535e-12	8.70845e-11	Pistil extensin like protein, partial CDS only (AHRD V3.3 *-* Q7DLN2_TOBAC)
Solyc07g062740.4.1	-1.16531	7.15473e-15	8.83996e-13	serine/arginine repetitive matrix protein (AHRD V3.3 --* AT3G15115.1)
Solyc10g085570.3.1	-1.16428	0.0091173	0.0469234	CTR1-like protein kinase-4
Solyc12g013520.3.1	-1.16393	0.00730644	0.039342	Unknown protein
Solyc02g086910.4.1	-1.16252	5.10888e-11	2.73511e-09	Peptidyl-prolyl cis-trans isomerase protein (AHRD V3.3 *** A0A2U1LHJ7_ARTAN)
Solyc01g006370.3.1	-1.16186	0.00289073	0.0189123	Callose synthase (AHRD V3.3 *** K7PRK8_MAIZE)
Solyc09g009900.4.1	-1.16142	5.95779e-05	0.000742126	Unknown protein
Solyc07g065530.1.1	-1.16136	0.00438106	0.0262748	flocculation protein FLO11 (AHRD V3.3 *** XP_004244068.1)
Solyc08g067430.4.1	-1.15986	8.97169e-26	7.13289e-23	DNA-directed RNA polymerase subunit beta (AHRD V3.3 *** AT2G25605.1)
Solyc08g076020.4.1	-1.15767	2.76687e-08	8.14733e-07	Cobalamin biosynthesis protein CobW (AHRD V3.3 *-* A0A2T6DKX1_9BACT)
Solyc07g040661.1.1	-1.15313	0.00883984	0.0458178	ARM repeat superfamily protein (AHRD V3.3 *-* AT3G06530.2)
Solyc02g092845.1.1	-1.15312	0.000647314	0.00560719	Unknown protein
Solyc03g113250.4.1	-1.15307	6.92338e-05	0.000842883	Major facilitator superfamily protein (AHRD V3.3 *** A0A1P8AT47_ARATH)
Solyc10g076700.2.1	-1.15238	3.05697e-07	7.15745e-06	Rhodanese-like domain-containing protein 10 (AHRD V3.3 *** A0A1U8EI03_CAPAN)
Solyc10g008130.3.1	-1.15223	1.70134e-11	9.81409e-10	RNA-binding (RRM/RBD/RNP motifs) family protein (AHRD V3.3 *** AT3G56510.5)
Solyc03g120700.3.1	-1.15179	0.00359951	0.0225235	Vps51/Vps67 family (Components of vesicular transport) protein (AHRD V3.3 *** F4KCR7_ARATH)
Solyc01g080340.3.1	-1.14861	8.46296e-05	0.00100229	BSD domain-containing protein (AHRD V3.3 *** A0A1Q3B6E5_CEPFO)
Solyc01g094540.4.1	-1.14798	0.00341484	0.0215914	Small nuclear ribonucleoprotein-associated protein (AHRD V3.3 *-* A0A2G3BT11_CAPCH)
Solyc10g054400.1.1	-1.14696	0.00478222	0.0281182	Transcription initiation factor IIF, beta subunit (AHRD V3.3 *** A0A2U1P1S9_ARTAN)
Solyc02g093170.4.1	-1.14604	3.09558e-09	1.1744e-07	Cyclin delta-3 (AHRD V3.3 *** F4JJY7_ARATH)
Solyc12g038650.1.1	-1.14456	0.00494019	0.0288522	Unknown protein
Solyc12g010840.2.1	-1.14417	4.21262e-15	5.38685e-13	Ketol-acid reductoisomerase (AHRD V3.3 *** M1ADA6_SOLTU)
Solyc10g080940.3.1	-1.14212	2.9558e-07	6.93834e-06	Tubulin beta chain (AHRD V3.3 *** A0A1U8EJY6_CAPAN)
Solyc05g009370.4.1	-1.1414	2.74065e-18	6.68207e-16	50S ribosomal protein L15 (AHRD V3.3 *** A0A2G2YCB4_CAPAN)
Solyc02g086730.3.1	-1.14034	6.21468e-28	9.47014e-25	Ribosomal protein L7/L12 (AHRD V3.3 *** A0A200R2P7_9MAGN)
Solyc01g087970.3.1	-1.13966	1.26266e-08	4.07934e-07	Carboxypeptidase (AHRD V3.3 *** A0A2G2XQG5_CAPBA)
Solyc06g082750.3.1	-1.13929	1.04278e-12	7.68886e-11	50S ribosomal protein L17 (AHRD V3.3 *** A0A1U8H2A3_CAPAN)
Solyc04g082010.1.1	-1.13862	1.88846e-20	7.34732e-18	pre-plastocyanin
Solyc12g098890.2.1	-1.13792	2.59453e-15	3.4885e-13	50S ribosomal protein L18 (AHRD V3.3 *** A0A1U8F639_CAPAN)
Solyc02g070800.2.1	-1.1362	1.02378e-11	6.19895e-10	DUF561 domain-containing protein (AHRD V3.3 *** A0A1Q3DH97_CEPFO)
Solyc11g033282.1.1	-1.13502	0.00420576	0.0255249	No exine formation-1 (AHRD V3.3 *** Q9LYR7_ARATH)
Solyc01g081200.3.1	-1.13447	6.47313e-09	2.25034e-07	hypothetical protein (AHRD V3.3 *** AT5G17610.1)
Solyc09g098170.4.1	-1.13444	9.38977e-18	1.95115e-15	Ras-related protein RABA5b (AHRD V3.3 *** A0A2G3CR82_CAPCH)
Solyc08g013720.4.1	-1.13411	4.19519e-06	7.31996e-05	S-adenosyl-L-methionine-dependent methyltransferases superfamily protein (AHRD V3.3 *-* A0A2U1KR65_ARTAN)
Solyc01g007840.3.1	-1.13206	9.52431e-14	8.79604e-12	Polynucleotidyl transferase, ribonuclease H-like superfamily protein (AHRD V3.3 *** A0A2U1M9A7_ARTAN)
Solyc10g081240.3.1	-1.13083	1.52496e-06	2.97286e-05	GrpE protein homolog (AHRD V3.3 *** A0A2G2VVH1_CAPBA)
Solyc12g095850.2.1	-1.13008	0.00110367	0.00866543	Tryptophan--tRNA ligase (AHRD V3.3 *** A0A2G2VHY5_CAPBA)
Solyc11g056297.1.1	-1.12947	0.00941212	0.0480084	Unknown protein
Solyc06g082760.4.1	-1.12935	5.99688e-07	1.30082e-05	50S ribosomal protein L17 (AHRD V3.3 *** A0A1U8H2A3_CAPAN)
Solyc12g042830.3.1	-1.12903	2.63766e-19	7.19883e-17	Class I heat shock protein (AHRD V3.3 *-* A0A2U1P7Z6_ARTAN)
Solyc03g005100.3.1	-1.12729	5.23492e-07	1.15471e-05	alpha/beta-Hydrolases superfamily protein (AHRD V3.3 *** AT3G27320.1)
Solyc10g075020.3.1	-1.12655	3.4049e-09	1.27572e-07	Elongation factor P (AHRD V3.3 *** A0A2G2YL80_CAPAN)
Solyc11g011200.2.1	-1.12591	0.00176693	0.0127005	Per1-like (AHRD V3.3 *** A0A200PW77_9MAGN)
Solyc02g071580.4.1	-1.12331	1.07178e-05	0.000166371	Subtilisin-like protease SBT5.3 (AHRD V3.3 *** A0A2G2XF91_CAPBA)
Solyc12g015840.3.1	-1.12302	0.000910229	0.00741401	Pleckstrin homology (PH) domain-containing protein (AHRD V3.3 *-* F4JNE4_ARATH)
Solyc02g064580.3.1	-1.12236	0.00431682	0.0260176	Transmembrane protein (DUF2215) (AHRD V3.3 *** F4K567_ARATH)
Solyc02g090540.4.1	-1.1214	0.000600464	0.0052486	Glucose/ribitol dehydrogenase (AHRD V3.3 *** A0A2U1NV71_ARTAN)
Solyc06g071320.3.1	-1.12102	9.86555e-05	0.00114613	D-ribose-binding periplasmic protein (AHRD V3.3 *** A0A2P5F6E6_TREOI)
Solyc07g049230.1.1	-1.11928	0.00157945	0.0116224	RmlC-like cupins superfamily protein (AHRD V3.3 *** AT2G32650.2)
Solyc04g054810.3.1	-1.11925	5.09504e-25	3.72672e-22	Pollen Ole e 1 allergen/extensin (AHRD V3.3 *** A0A200QVY0_9MAGN),Pfam:PF01190
Solyc06g065490.3.1	-1.11905	3.08513e-16	5.08241e-14	Photosystem II reaction center PsbP family protein (AHRD V3.3 *** A0A0F7CYM1_9ROSI)
Solyc01g095370.3.1	-1.11889	1.19311e-06	2.3792e-05	F-box/kelch-repeat protein (AHRD V3.3 *** A0A1U8DT00_CAPAN)
Solyc01g110160.4.1	-1.11614	1.33269e-08	4.26041e-07	hypothetical protein (AHRD V3.3 *** AT2G21385.5)
Solyc07g006180.3.1	-1.11482	2.43601e-18	6.01957e-16	ripening regulated protein (DDTFR5)
Solyc12g010340.3.1	-1.11277	3.16834e-07	7.38042e-06	PHD finger-like domain-containing protein 5A (AHRD V3.3 *** A0A1U8E1D6_CAPAN)
Solyc04g050470.4.1	-1.11248	2.37996e-10	1.14828e-08	Ammonium transporter (AHRD V3.3 *** A0A2K3LM80_TRIPR)
Solyc04g014480.3.1	-1.10928	2.59329e-25	1.97587e-22	15.7 kDa heat shock protein, peroxisomal (AHRD V3.3 *** A0A1U8GLK8_CAPAN)
Solyc01g010950.3.1	-1.10924	9.85774e-07	2.01857e-05	MAP kinase kinase kinase 2
Solyc12g088420.2.1	-1.10878	6.35694e-15	8.01676e-13	Peroxisomal membrane 22 kDa (Mpv17/PMP22) family protein (AHRD V3.3 *** A0A2U1NNX3_ARTAN)
Solyc10g006520.3.1	-1.10835	0.00411422	0.0251362	Thioredoxin domain-containing protein (AHRD V3.3 *** A0A1Q3BMD7_CEPFO)
Solyc09g090870.3.1	-1.10675	0.000277418	0.0027827	DNA mismatch repair protein 1
Solyc04g053120.3.1	-1.10502	1.72363e-06	3.28428e-05	4-alpha-glucanotransferase (AHRD V3.3 *** A0A1U8EWW1_CAPAN)
Solyc03g025680.3.1	-1.10494	0.00122297	0.00939628	PAR1 (AHRD V3.3 *** A0A2U1P9T7_ARTAN)
Solyc07g009545.1.1	-1.10465	0.00265474	0.0176333	Unknown protein
Solyc09g025260.4.1	-1.10372	1.61238e-05	0.000236629	Rho termination factor (AHRD V3.3 *** A0A200PW00_9MAGN)
Solyc03g116550.4.1	-1.10339	0.00541762	0.0310359	O-fucosyltransferase family protein (AHRD V3.3 *** A0A2U1MV70_ARTAN)
Solyc11g064790.2.1	-1.10143	6.50141e-07	1.397e-05	Signal peptide peptidase (AHRD V3.3 *** A0A2G2VN53_CAPBA)
Solyc06g069000.3.1	-1.10054	0.000528885	0.00470131	GPI-anchored protein (AHRD V3.3 *** AT3G18050.1)
Solyc03g093360.3.1	-1.10047	4.80396e-05	0.000615163	PLAT/LH2 domain (AHRD V3.3 *** A0A200QDT2_9MAGN)
Solyc05g013170.2.1	-1.10002	6.6443e-08	1.81069e-06	GCK domain-containing protein (AHRD V3.3 *-* A0A1Q3BWH3_CEPFO)
Solyc11g009020.2.1	-1.1	3.96052e-20	1.44844e-17	Haloacid dehalogenase-like hydrolase (HAD) superfamily protein (AHRD V3.3 *** A0A2U1MUT6_ARTAN),Pfam:PF13419
Solyc04g077690.3.1	-1.09922	0.00500654	0.0291374	hypothetical protein (AHRD V3.3 --* AT4G33800.2)
Solyc06g016790.3.1	-1.09904	0.000526552	0.00468314	proline-rich receptor-like protein kinase PERK13 (AHRD V3.3 *** XP_004240680.1)
Solyc02g062580.3.1	-1.09872	1.07821e-13	9.76048e-12	Lipid phosphate phosphatase epsilon 2, chloroplastic (AHRD V3.3 *** A0A2G2XB00_CAPBA)
Solyc01g006050.2.1	-1.09754	0.00764647	0.0408244	transmembrane protein 45B-like (AHRD V3.3 *** A0A2I4DQK0_9ROSI)
Solyc11g062440.2.1	-1.09635	1.65733e-06	3.19347e-05	L-ascorbate oxidase (AHRD V3.3 *** ASO_TOBAC)
Solyc03g120150.3.1	-1.09625	1.54668e-05	0.000228905	Late embryogenesis abundant (LEA) hydroxyproline-rich glycoprotein family (AHRD V3.3 *-* A0A2U1N5H2_ARTAN)
Solyc01g105060.3.1	-1.09408	2.94498e-06	5.3056e-05	3-hydroxyacyl-[acyl-carrier-protein] dehydratase FabZ (AHRD V3.3 *** A0A2G2X231_CAPBA)
Solyc03g123620.4.1	-1.09146	0.000800397	0.00665275	Pectinesterase (AHRD V3.3 *** A0A2G3D1E1_CAPCH)
Solyc01g060130.3.1	-1.09146	5.54789e-09	1.98401e-07	TOMGTPASE Mill. GTPase
Solyc03g096930.4.1	-1.09103	3.58965e-05	0.000475655	RING/U-box superfamily protein (AHRD V3.3 *** A0A1P8ASM3_ARATH)
Solyc07g042390.3.1	-1.09084	5.15367e-06	8.79104e-05	Plant invertase/pectin methylesterase inhibitor superfamily protein (AHRD V3.3 *** A0A061GSW0_THECC)
Solyc08g080420.4.1	-1.09027	0.000182576	0.00195697	GPI transamidase subunit PIG-U (AHRD V3.3 *** A0A200QUK8_9MAGN)
Solyc04g009320.3.1	-1.08802	0.00719414	0.0389668	hsp70 nucleotide exchange factor FES1 (AHRD V3.3 *** A0A2I4FCD8_9ROSI)
Solyc08g016670.3.1	-1.08695	1.22403e-37	7.46087e-34	calcyclin-binding protein-like (AHRD V3.3 *** A0A2I4DRI6_9ROSI)
Solyc07g026810.3.1	-1.08627	2.16965e-06	4.04014e-05	Chaperone protein dnaJ (AHRD V3.3 *** A0A2K3P9F4_TRIPR)
Solyc11g044875.1.1	-1.08566	2.78978e-07	6.60802e-06	Unknown protein
Solyc10g011820.4.1	-1.08357	4.67464e-11	2.54406e-09	Delta(8)-fatty-acid desaturase (AHRD V3.3 *** A0A2G3BES8_CAPCH)
Solyc06g011570.3.1	-1.08252	0.000874871	0.00716535	Haloacid dehalogenase-like hydrolase family protein (AHRD V3.3 *-* A0A2U1QHW6_ARTAN)
Solyc12g006980.2.1	-1.08168	0.00134734	0.0101773	Leucine-rich repeat family protein (AHRD V3.3 *-* A0A061GNA0_THECC)
Solyc03g096760.1.1	-1.08129	0.00149254	0.011072	Protein RESPONSE TO LOW SULFUR 2 (AHRD V3.3 *-* LSU2_ARATH)
Solyc07g006000.3.1	-1.08074	1.9862e-15	2.69035e-13	50S ribosomal protein L35 (AHRD V3.3 *** A0A2G3BXF7_CAPCH)
Solyc04g009540.1.1	-1.0804	2.0234e-11	1.15312e-09	50S ribosomal protein L10 (AHRD V3.3 *** B6SUJ0_MAIZE)
Solyc07g007060.3.1	-1.07328	9.26599e-08	2.46994e-06	Metal tolerance protein (AHRD V3.3 *** E5GC92_CUCME)
Solyc02g083400.3.1	-1.07162	9.62686e-06	0.000152147	RING/U-box superfamily protein (AHRD V3.3 *** A0A2U1ML59_ARTAN)
Solyc01g097460.3.1	-1.0712	4.31242e-18	1.01099e-15	Ribose 5-phosphate isomerase A (AHRD V3.3 *** A0A1Y1IHK3_KLENI)
Solyc05g013730.3.1	-1.07088	1.88415e-08	5.76148e-07	O-fucosyltransferase (AHRD V3.3 *** A0A2P5FMT7_TREOI)
Solyc01g008250.3.1	-1.0686	9.08145e-18	1.90877e-15	Thioredoxin (AHRD V3.3 *** A0A2U1L6U5_ARTAN)
Solyc12g019550.2.1	-1.06814	2.14309e-08	6.45936e-07	hypothetical protein (AHRD V3.3 *-* AT1G21500.1)
Solyc05g008770.3.1	-1.06672	3.79312e-07	8.60557e-06	Amino-acid permease BAT1-like protein (AHRD V3.3 *-* A0A2G3B695_CAPCH)
Solyc01g065530.3.1	-1.06283	0.000128664	0.0014371	COBRA-like protein (AHRD V3.3 *** A0A2G3AIT3_CAPAN)
Solyc06g069530.3.1	-1.06177	4.35771e-11	2.38578e-09	Biotin carboxyl carrier protein of acetyl-CoA carboxylase (AHRD V3.3 *** A0A1U8FI08_CAPAN)
Solyc06g084260.3.1	-1.06138	1.72965e-13	1.49897e-11	Fatty-acid-binding protein 1 (AHRD V3.3 *** A0A1U8HAC4_CAPAN)
Solyc09g062970.1.1	-1.0609	0.000981346	0.00787574	Unknown protein
Solyc07g048090.2.1	-1.06069	8.02093e-07	1.68781e-05	Fasciclin-like arabinogalactan protein 7 (AHRD V3.3 *** A0A2G2Z2X7_CAPAN)
Solyc01g104400.3.1	-1.06063	1.24574e-05	0.000189199	Basic blue protein (AHRD V3.3 *** A0A1U8E747_CAPAN)
Solyc05g056390.2.1	-1.06045	6.77408e-24	3.99583e-21	10 kDa chaperonin (AHRD V3.3 *** A0A1U8F6X5_CAPAN)
Solyc12g088820.2.1	-1.0599	1.24903e-08	4.04243e-07	Non-specific serine/threonine protein kinase (AHRD V3.3 *** A0A2G3B403_CAPCH)
Solyc12g014470.2.1	-1.05941	7.32284e-09	2.52176e-07	GrpE protein homolog (AHRD V3.3 *** A0A2G3CV39_CAPCH)
Solyc05g052500.4.1	-1.05925	0.00549538	0.0313537	S-adenosyl-L-methionine-dependent methyltransferases superfamily protein (AHRD V3.3 *** A0A1I9LPV2_ARATH)
Solyc07g042300.1.1	-1.05851	2.80629e-08	8.23688e-07	Dirigent protein (AHRD V3.3 *** K4CE93_SOLLC)
Solyc12g044730.2.1	-1.05744	0.00389767	0.0240057	40S ribosomal protein S15a (AHRD V3.3 *** B6U773_MAIZE)
Solyc02g065430.1.1	-1.0567	3.02466e-13	2.50267e-11	HTH-type transcriptional regulator (AHRD V3.3 *** Q680G2_ARATH)
Solyc05g051560.4.1	-1.0564	0.00217618	0.0150905	Mitochondrial substrate carrier family protein (AHRD V3.3 *** A0A1P8BDA7_ARATH)
Solyc09g064500.3.1	-1.05444	1.44707e-19	4.3379e-17	Photosystem II reaction center Psb28 protein (AHRD V3.3 *** A0A1U8EF03_CAPAN)
Solyc12g009600.2.1	-1.05381	7.5662e-13	5.76481e-11	Thylakoid lumenal 16.5 kDa protein, chloroplastic (AHRD V3.3 *** A0A2G2YVM2_CAPAN)
Solyc01g100080.3.1	-1.05304	0.00909413	0.0468569	Single-stranded DNA-binding protein, mitochondrial (AHRD V3.3 *** A0A2G2V7W4_CAPBA)
Solyc07g007270.3.1	-1.05286	0.000236831	0.00243297	Unknown protein
Solyc11g008420.3.1	-1.05284	5.20876e-16	8.1408e-14	SKP1-like protein (AHRD V3.3 *** A0A2K3JJY8_TRIPR)
Solyc02g092260.3.1	-1.05247	0.00278531	0.0183804	Amino-acid acetyltransferase-like protein (AHRD V3.3 *** A0A2K3MR62_TRIPR)
Solyc07g047710.3.1	-1.05235	1.89317e-05	0.000270881	Glucan endo-1,3-beta-glucosidase 1 (AHRD V3.3 *** A0A2G2WCP3_CAPBA)
Solyc10g085230.2.1	-1.05087	0.000188775	0.00200577	ripening-related mRNA 1b
Solyc12g100160.3.1	-1.05076	1.23497e-14	1.4203e-12	50S ribosomal protein L6 (AHRD V3.3 *** A0A2G2YBF1_CAPAN)
Solyc10g075030.3.1	-1.04813	0.00985657	0.0496111	B3 domain-containing protein (AHRD V3.3 *** A0A2G3BDR8_CAPCH)
Solyc10g083650.1.1	-1.04782	1.00766e-11	6.1216e-10	Peroxiredoxin-2E, chloroplastic (AHRD V3.3 *** A0A2G2YMS7_CAPAN)
Solyc09g092690.3.1	-1.04687	5.43743e-19	1.441e-16	Peptidylprolyl isomerase (AHRD V3.3 *** A0A2G2W2H8_CAPBA)
Solyc03g120720.3.1	-1.04611	0.000184226	0.0019723	Protein disulfide isomerase-like 1-5 (AHRD V3.3 *** A0A2G2WP56_CAPBA)
Solyc01g067630.3.1	-1.04592	7.05988e-08	1.91243e-06	NAD(P)-binding Rossmann-fold superfamily protein (AHRD V3.3 *** Q8VZB1_ARATH)
Solyc06g008160.4.1	-1.04583	7.24196e-08	1.94745e-06	Protein FLUORESCENT IN BLUE LIGHT, chloroplastic (AHRD V3.3 *** A0A2G3C412_CAPCH)
Solyc07g021710.3.1	-1.04521	0.00175709	0.0126474	Inorganic pyrophosphatase 1 (AHRD V3.3 *** A0A2G2ZBE0_CAPAN)
Solyc04g076470.1.1	-1.04466	0.00483519	0.0283357	Tetratricopeptide repeat (TPR)-like superfamily protein (AHRD V3.3 *** A0A2U1N5R2_ARTAN)
Solyc06g005200.3.1	-1.04388	0.00402622	0.0246645	Ribonuclease P protein subunit p30 (AHRD V3.3 *-* A0A1J3CKF4_NOCCA)
Solyc01g105010.3.1	-1.04376	3.31051e-05	0.000443474	Non-specific lipid-transfer protein-like protein (AHRD V3.3 *** A0A2G2W8U5_CAPBA)
Solyc01g094690.4.1	-1.04371	9.60809e-28	1.35149e-24	plasma membrane intrinsic protein 1.2
Solyc03g123720.4.1	-1.04277	3.21639e-07	7.46383e-06	O-fucosyltransferase family protein (AHRD V3.3 *** F4HTC2_ARATH)
Solyc11g011250.3.1	-1.04261	1.25375e-19	3.95277e-17	dehydroascorbate reductase 2
Solyc02g086820.3.1	-1.04252	5.41023e-07	1.18765e-05	chloroplast carbonic anhydrase
Solyc03g115140.4.1	-1.04016	0.000697019	0.00595037	DNAJ protein JJJ1 homolog (AHRD V3.3 *** A0A2I4EZM7_9ROSI)
Solyc10g017580.3.1	-1.03768	6.41228e-05	0.000791193	Digalactosyldiacylglycerol synthase 2, chloroplastic (AHRD V3.3 *** A0A1U8EN08_CAPAN)
Solyc08g080080.4.1	-1.03758	1.04427e-08	3.45934e-07	WD40 repeat (AHRD V3.3 *** A0A200PPM9_9MAGN)
Solyc06g075220.1.1	-1.03756	0.00286548	0.0188077	Fasciclin-like arabinogalactan protein 11 (AHRD V3.3 *** A0A2G2V1G2_CAPBA)
Solyc03g113910.3.1	-1.03622	2.36681e-06	4.36285e-05	Gibberellin-regulated protein 14 (AHRD V3.3 *** A0A2G3AWC5_CAPCH)
Solyc03g007120.3.1	-1.03455	6.00265e-06	0.000100701	Protein trichome birefringence-like 18 (AHRD V3.3 *** A0A2G3CVX7_CAPCH)
Solyc07g065500.2.1	-1.03307	0.000202665	0.00213352	Nuclear transcription factor Y subunit B-3 (AHRD V3.3 *** A0A2G2WFH7_CAPBA)
Solyc12g006140.2.1	-1.03076	3.16924e-12	2.11506e-10	Cab-5 gene encoding chlorophyll a/b-binding protein
Solyc01g081290.4.1	-1.03074	0.00987098	0.0496563	Pentatricopeptide repeat-containing protein (AHRD V3.3 *** A0A2G3ALT8_CAPAN)
Solyc09g015080.3.1	-1.03014	1.56882e-21	7.5493e-19	Patellin-6 (AHRD V3.3 *** A0A1U8EDI8_CAPAN)
Solyc09g018830.2.1	-1.02758	0.000335182	0.00325671	MLO-like protein (AHRD V3.3 *** M1BT43_SOLTU)
Solyc03g113880.4.1	-1.02732	0.00300889	0.0195178	DNA glycosylase superfamily protein (AHRD V3.3 *** A0A2U1LXN0_ARTAN)
Solyc07g064100.1.1	-1.02731	0.000474042	0.0043169	Chlororespiratory reduction 41 (AHRD V3.3 *** A0A0F7J422_9ROSI)
Solyc08g023500.4.1	-1.027	0.00218109	0.0151188	Metallo-hydrolase/oxidoreductase superfamily protein (AHRD V3.3 *** A0A2U1PDH4_ARTAN)
Solyc01g094660.3.1	-1.02472	8.43759e-06	0.000136178	Protein kinase domain (AHRD V3.3 *** A0A200QU61_9MAGN)
Solyc07g065900.3.1	-1.02366	3.31066e-13	2.72697e-11	Fructose-bisphosphate aldolase (AHRD V3.3 *** A0A200Q3T9_9MAGN)
Solyc05g009330.3.1	-1.02255	2.77099e-12	1.88365e-10	Fiber protein Fb34 (AHRD V3.3 *** B4FVT6_MAIZE)
Solyc02g063355.1.1	-1.02023	2.53706e-14	2.71302e-12	Calcium-dependent lipid-binding (CaLB domain) family protein (AHRD V3.3 *** A0A2U1LMA8_ARTAN)
Solyc04g050730.3.1	-1.01989	9.98494e-05	0.0011556	GDSL esterase/lipase (AHRD V3.3 *** A0A2R6PKD3_ACTCH)
Solyc07g054210.3.1	-1.01918	5.39938e-20	1.89871e-17	light dependent NADH:protochlorophyllide oxidoreductase 2
Solyc01g098640.3.1	-1.01722	5.74275e-18	1.28063e-15	UPF0603 protein, chloroplastic (AHRD V3.3 *** A0A1U8E5D6_CAPAN)
Solyc11g044360.3.1	-1.01715	0.000175708	0.00189334	Mitochondrial transcription termination factor family protein (AHRD V3.3 *** F4JSZ0_ARATH)
Solyc03g083270.4.1	-1.01636	0.00580079	0.0326681	E3 ubiquitin-protein ligase (AHRD V3.3 *** A0A2G2X7A7_CAPBA)
Solyc07g040730.1.1	-1.01633	2.53683e-14	2.71302e-12	DUF3511 domain-containing protein (AHRD V3.3 *** A0A1Q3CMD7_CEPFO)
Solyc08g066390.3.1	-1.01501	1.61131e-07	4.05847e-06	SAWADEE HOMEODOMAIN protein (AHRD V3.3 *** A0A178W211_ARATH)
Solyc07g066070.3.1	-1.01399	2.56554e-28	4.69135e-25	KH domain-containing protein (AHRD V3.3 *** A0A1U8HDP0_CAPAN)
Solyc05g006400.2.1	-1.01124	6.69141e-10	2.94132e-08	inositol-1%2C4%2C5-trisphosphate 5-phosphatase (AHRD V3.3 *** AT5G54870.1)
Solyc09g005120.3.1	-1.01105	4.00407e-18	9.63401e-16	DnaJ protein ERDJ3A (AHRD V3.3 *** A0A2G2VZ69_CAPBA)
Solyc07g062750.4.1	-1.01065	0.00882471	0.0457524	Polynucleotidyl transferase%2C ribonuclease H-like superfamily protein (AHRD V3.3 *** AT3G15140.1)
Solyc07g066430.3.1	-1.01065	2.2288e-08	6.69224e-07	Ribosome-binding ATPase YchF (AHRD V3.3 *** A0A1J3HW77_NOCCA)
Solyc06g071960.4.1	-1.01036	1.09085e-08	3.58764e-07	Nucleoside diphosphate kinase (AHRD V3.3 *** A0A2G2WM92_CAPBA)
Solyc07g007110.4.1	-1.00975	4.44506e-18	1.02889e-15	Peptidyl-prolyl cis-trans isomerase (AHRD V3.3 *** A0A2U1P8R3_ARTAN)
Solyc01g087040.2.1	-1.00894	2.91701e-09	1.11126e-07	Photosystem II PsbP (AHRD V3.3 *** A0A200Q959_9MAGN)
Solyc08g007040.3.1	-1.00892	4.20307e-14	4.36689e-12	Glycine cleavage system H protein (AHRD V3.3 *** A0A2G2W3F1_CAPBA)
Solyc03g006050.4.1	-1.00831	0.000186496	0.00199039	receptor-like protein 51 (AHRD V3.3 *-* A0A2I4GVM3_9ROSI)
Solyc07g056010.3.1	-1.00827	0.00109567	0.00862063	Conserved oligomeric Golgi complex subunit 4 (AHRD V3.3 *** A0A2G2WMR4_CAPBA)
Solyc09g059650.4.1	-1.0081	8.77417e-18	1.86563e-15	Unknown protein
Solyc09g075710.1.1	-1.00751	0.000701519	0.00598041	Alpha/beta-Hydrolases superfamily protein (AHRD V3.3 *** A0A2U1KC75_ARTAN)
Solyc02g092990.1.1	-1.00402	0.00343551	0.0216926	F-box protein (AHRD V3.3 *** A0A2G2XGV7_CAPBA)
Solyc06g005940.3.1	-1.00222	2.07591e-10	1.01227e-08	Protein disulfide-isomerase (AHRD V3.3 *** A0A1U8GX36_CAPAN)
