# Supplementary material for: Application of ethanol alleviates heat damage to leaf growth and yield in tomato
Source: Front Plant Sci. 2024 Feb 19;15:1325365. doi: 10.3389/fpls.2024.1325365 (PMC10909983; doi:10.3389/fpls.2024.1325365)
Supplement: Supplementary file 8 [file Table_7.xlsx]

## Sheet: UP
Supplemental Table S7. Up-regulated DEGs of E3H90m vs W3H90m in root (log2 fold change ≧ 1.0, p_value < 0.05, p_adj < 0.05).
GeneID	log2FoldChange	p_value	p_adj	Annotation	IDR
Solyc05g053170.3.1	5.65271	1.30198e-07	2.96587e-06	Chalcone synthase (AHRD V3.3 *** A0A2G2ZJX1_CAPAN)	FALSE
Solyc07g052960.3.1	5.11305	4.71909e-08	1.21183e-06	GRAS family TF	FALSE
Solyc09g082340.2.1	4.97945	5.5361e-05	0.000614862	vicilin	TRUE
Solyc07g064660.1.1	4.82096	0.00144119	0.00943406	Geranylgeranyl diphosphate synthase (AHRD V3.3 *** A0A223HEC2_CAMSI)	TRUE
Solyc07g042760.1.1	4.75305	0.00102745	0.00711184	Pentatricopeptide repeat (AHRD V3.3 *** A0A200R9C5_9MAGN)	FALSE
Solyc07g052120.4.1	4.5912	0.00143307	0.00939274	Sesquiterpene synthase (AHRD V3.3 *** A0A2G3AYX6_CAPCH)	FALSE
Solyc05g025670.1.1	4.55054	0.000257829	0.00223338	Riboflavin synthase-like superfamily protein (AHRD V3.3 --* AT4G25090.2)	FALSE
Solyc08g006410.4.1	4.43409	7.45124e-09	2.40874e-07	Glycosyltransferase (AHRD V3.3 *** B9VJL9_9SOLA)	FALSE
Solyc01g107070.4.1	4.32532	0.000365355	0.00302254	HXXXD-type acyl-transferase family protein (AHRD V3.3 *** A0A2K3MRI0_TRIPR)	FALSE
Solyc07g062290.3.1	4.25107	7.66899e-05	0.000808519	Ubiquitin domain-containing protein (AHRD V3.3 *** A0A2U1LN61_ARTAN)	TRUE
Solyc10g075070.3.1	4.19143	5.96755e-05	0.000654808	Non-specific lipid-transfer protein (AHRD V3.3 *** K4D1U9_SOLLC)	FALSE
Solyc09g015370.1.1	4.1573	0.0006812	0.00504468	Pentatricopeptide repeat (AHRD V3.3 *** A0A200R528_9MAGN)	FALSE
Solyc08g023340.4.1	4.07981	0.000249322	0.00217496	Unknown protein	FALSE
Solyc01g098470.2.1	4.0143	0.000106476	0.00106986	Unknown protein	FALSE
Solyc06g082420.4.1	4.00428	0.000803683	0.00581164	Peroxidase (AHRD V3.3 *** K4CAA1_SOLLC)	FALSE
Solyc02g079640.3.1	3.9699	0.00149493	0.00971609	G-type lectin S-receptor-like serine/threonine-protein kinase (AHRD V3.3 *** A0A2G3A8X5_CAPAN)	FALSE
Solyc09g009560.2.1	3.96108	0.000541727	0.00418925	Terminal flower 1 (AHRD V3.3 *** A0A2Z4I2Q4_CITLI)	TRUE
Solyc10g078890.2.1	3.9237	3.44557e-06	5.5649e-05	Peroxidase (AHRD V3.3 *** K4D2D0_SOLLC)	FALSE
Solyc01g014730.2.1	3.89839	0.00464583	0.0244223	Unknown protein	FALSE
Solyc08g005930.1.1	3.87586	0.000433039	0.00349027	F-box/kelch-repeat protein SKIP25 (AHRD V3.3 *** A0A2G2XM52_CAPBA)	FALSE
Solyc11g011180.3.1	3.87033	0.00159957	0.010291	Lrr receptor-like serinethreonine-protein kinase gso1 (AHRD V3.3 *** A0A1J6IBH9_NICAT)	FALSE
Solyc03g044960.2.1	3.86907	0.00063011	0.00473315	Calcium uniporter protein 2, mitochondrial (AHRD V3.3 *** A0A2G3ABZ2_CAPAN)	TRUE
Solyc03g119410.1.1	3.84661	0.00059756	0.00453411	VQ motif-containing protein 8, chloroplastic (AHRD V3.3 *** A0A2G2WPJ8_CAPBA)	TRUE
Solyc06g066680.3.1	3.7818	0.00358811	0.0198362	Mitochondrial carrier protein (AHRD V3.3 *** A0A200PP03_9MAGN)	FALSE
Solyc07g014580.3.1	3.76491	0.00244317	0.0145826	HXXXD-type acyl-transferase family protein (AHRD V3.3 *** Q9MAP9_ARATH)	FALSE
Solyc11g064980.1.1	3.75165	4.53867e-11	2.41678e-09	Unknown protein	FALSE
Solyc10g011925.1.1	3.75005	0.00123162	0.00829737	Phenylalanine ammonia-lyase (AHRD V3.3 *** A0A2G3BJ62_CAPCH)	FALSE
Solyc07g052170.1.1	3.74343	0.00132252	0.00880559	Dirigent protein (AHRD V3.3 *** K4CFB6_SOLLC)	FALSE
Solyc03g043740.4.1	3.73639	1.41748e-05	0.000188937	Hydroxyproline-rich glycoprotein family protein (AHRD V3.3 *** A0A2U1M3E1_ARTAN)	FALSE
Solyc09g082280.3.1	3.71	5.58234e-09	1.86493e-07	Lipid transfer protein (AHRD V3.3 *** K7WVB3_SOLTU)	TRUE
Solyc02g005280.1.1	3.69548	0.00172192	0.0109406	Pentatricopeptide repeat (AHRD V3.3 *** A0A200Q5Q8_9MAGN)	FALSE
Solyc12g005620.1.1	3.66392	0.00843511	0.0387494	receptor-like protein kinase (AHRD V3.3 *** A0A1U7YIF9_NICSY)	FALSE
Solyc07g008210.4.1	3.51593	0.000260274	0.00225178	Tetratricopeptide repeat (TPR)-like superfamily protein (AHRD V3.3 *-* F4K464_ARATH)	TRUE
Solyc02g062300.3.1	3.49382	0.00678471	0.0327215	BURP domain-containing protein (AHRD V3.3 *** A0A2U1M493_ARTAN)	FALSE
Solyc03g120620.3.1	3.49103	0.00148382	0.00965885	Homeobox-leucine zipper protein GLABRA 2 (AHRD V3.3 *** A0A2G3A3K0_CAPAN)	TRUE
Solyc05g055030.2.1	3.46202	0.00503933	0.025964	R2R3MYB transcription factor 10	TRUE
Solyc11g021060.2.1	3.45745	8.59309e-20	2.46963e-17	TOMARPIX proteinase inhibitor	FALSE
Solyc02g087470.4.1	3.45453	0.000489373	0.0038511	CLAVATA3/ESR-RELATED 26 (AHRD V3.3 --* AT1G69970.2)	TRUE
Solyc06g053510.3.1	3.4526	3.18772e-08	8.67735e-07	putrescine N-methyltransferase,Pfam:PF01564	TRUE
Solyc11g072310.2.1	3.40392	1.49092e-10	6.98201e-09	gibberellin 20-oxidase-3	FALSE
Solyc07g062630.1.1	3.3783	0.00960905	0.0430213	ABC transporter G family member 10 (AHRD V3.3 *** A0A2G2Z509_CAPAN)	TRUE
Solyc03g097610.3.1	3.36973	2.6319e-10	1.18238e-08	Bidirectional sugar transporter SWEET (AHRD V3.3 *** M1D4D6_SOLTU)	FALSE
Solyc10g050980.1.1	3.33319	0.000172468	0.00159963	Unknown protein	TRUE
Solyc03g121900.1.1	3.27121	3.75557e-08	9.99897e-07	Bifunctional inhibitor/plant lipid transfer protein/seed storage helical domain containing protein (AHRD V3.3 *** A0A2P5DNS6_PARAD)	FALSE
Solyc12g014340.1.1	3.25462	0.00348162	0.0193736	IRK-interacting protein-like (AHRD V3.3 *-* A0A2I4G928_9ROSI)	FALSE
Solyc11g010220.2.1	3.24389	0.0104605	0.0459315	Pentatricopeptide repeat (AHRD V3.3 *** A0A200RDY1_9MAGN)	FALSE
Solyc09g010510.4.1	3.23872	0.00183279	0.011561	NAD(P)-binding Rossmann-fold superfamily protein (AHRD V3.3 *** A0A2U1QM80_ARTAN)	TRUE
Solyc03g096260.3.1	3.21724	0.000440543	0.00352905	Protein yippee-like (AHRD V3.3 *** A0A1U8GAE4_CAPAN)	FALSE
Solyc07g009473.1.1	3.21696	0.00469981	0.0245761	Unknown protein	FALSE
Solyc02g085660.1.1	3.19601	8.30707e-07	1.54369e-05	Glycosyltransferase (AHRD V3.3 *** A0A2I4ENI5_9ROSI)	FALSE
Solyc12g041890.2.1	3.18046	0.00731686	0.0346763	Non-structural maintenance of chromosomes element 4-like protein B (AHRD V3.3 *** A0A2G3DE98_CAPCH)	TRUE
Solyc01g104780.3.1	3.16124	0.000435093	0.0035001	Vacuolar iron transporter-like protein (AHRD V3.3 *** A0A2K3NGY4_TRIPR)	FALSE
Solyc06g009040.4.1	3.1559	1.29244e-09	4.9523e-08	Glutathione S-transferase (AHRD V3.3 *** A0A2G3C3Q3_CAPCH)	FALSE
Solyc07g006740.3.1	3.14314	3.8129e-05	0.00044491	Protein DETOXIFICATION (AHRD V3.3 *** A0A2I4FHR8_9ROSI)	FALSE
Solyc07g055470.3.1	3.14017	0.00743262	0.0351208	Cytochrome (AHRD V3.3 *** A0A2G2Z447_CAPAN)	FALSE
Solyc12g089300.2.1	3.13652	0.006591	0.0320387	Gibberellin regulated protein (AHRD V3.3 *** A0A200QKC0_9MAGN)	FALSE
Solyc12g009875.1.1	3.11202	0.00931817	0.0419428	Unknown protein	FALSE
Solyc10g081550.2.1	3.08135	6.83759e-06	0.000101812	Cytochrome P450 (AHRD V3.3 *** A0A2U1Q1Z2_ARTAN)	FALSE
Solyc04g011340.3.1	3.02552	7.95069e-06	0.000115596	WAT1-related protein (AHRD V3.3 *** K4BPI9_SOLLC)	FALSE
Solyc09g066450.3.1	3.01972	0.00796816	0.0370587	Transcription factor GRAS (AHRD V3.3 *** A0A2U1MEJ8_ARTAN)	TRUE
Solyc06g072000.3.1	2.99215	0.000195076	0.0017748	P-loop containing nucleoside triphosphate hydrolases superfamily protein (AHRD V3.3 *** A0A2U1N2C4_ARTAN)	TRUE
Solyc07g054470.1.1	2.97436	0.000533157	0.00413212	hypothetical protein (AHRD V3.3 *** AT1G52855.1)	FALSE
Solyc05g006870.3.1	2.97192	2.9209e-13	2.39377e-11	Thioredoxin (AHRD V3.3 *** A0A2G2VLZ1_CAPBA)	FALSE
Solyc04g007630.2.1	2.96969	0.00428234	0.0229251	Heavy metal-associated isoprenylated plant protein (AHRD V3.3 *** A0A2R6PB10_ACTCH)	TRUE
Solyc10g050990.2.1	2.96198	0.000704299	0.00518827	Unknown protein	TRUE
Solyc02g086350.3.1	2.95535	0.00706458	0.0337466	Protein PLASTID MOVEMENT IMPAIRED 2 (AHRD V3.3 *** A0A1J3GMT9_NOCCA)	TRUE
Solyc08g077070.3.1	2.93541	0.000238649	0.0020958	Unknown protein	FALSE
Solyc02g089140.3.1	2.92594	8.24768e-05	0.000860877	B12D protein (AHRD V3.3 *** A0A2U1M961_ARTAN)	FALSE
Solyc04g077580.3.1	2.8971	0.00018758	0.00171329	BnaC03g48770D protein (AHRD V3.3 *** A0A078HIB5_BRANA)	FALSE
Solyc09g005730.4.1	2.89685	0.00500357	0.0258368	Plant protein 1589 of Uncharacterized protein function (AHRD V3.3 *** A0A061EZD3_THECC)	TRUE
Solyc07g008240.3.1	2.88458	1.22457e-05	0.000166363	Non-symbiotic hemoglobin like (AHRD V3.3 *** A0A2R6R1Q2_ACTCH)	FALSE
Solyc06g066820.4.1	2.88059	0.000510703	0.00398977	Le3OH-13b-hydroxylase	TRUE
Solyc06g068270.3.1	2.85348	0.000109347	0.00109347	2-oxoglutarate (2OG) and Fe(II)-dependent oxygenase superfamily protein (AHRD V3.3 *** Q9XIA5_ARATH)	FALSE
Solyc07g009230.3.1	2.85288	4.751e-22	2.43112e-19	Defensin-like protein 1 (AHRD V3.3 *** A0A2G2ZS54_CAPAN)	FALSE
Solyc08g068720.1.1	2.84602	0.000981931	0.00686011	Tyramine N-feruloyltransferase 10/30 (AHRD V3.3 *** A0A2G2W3Q5_CAPBA)	TRUE
Solyc04g045565.1.1	2.79981	0.00366825	0.0201941	Unknown protein	TRUE
Solyc06g073570.4.1	2.79561	2.74975e-05	0.000335405	Cytochrome P450 (AHRD V3.3 *** A0A2U1Q1Z2_ARTAN)	TRUE
Solyc11g072200.2.1	2.76392	8.92783e-19	2.17798e-16	2-oxoglutarate (2OG) and Fe(II)-dependent oxygenase superfamily protein (AHRD V3.3 *** F4IV21_ARATH)	TRUE
Solyc12g011060.3.1	2.76141	0.00716723	0.0341454	Zinc finger protein (AHRD V3.3 *** A0A200PQI4_9MAGN)	FALSE
Solyc01g087200.3.1	2.75358	0.00416665	0.0224202	Disease resistance protein (AHRD V3.3 *** A0A2U1Q201_ARTAN)	TRUE
Solyc03g063730.4.1	2.73001	0.000986387	0.00688403	Protein DETOXIFICATION (AHRD V3.3 *** A0A191UP89_GLYSO)	FALSE
Solyc03g031630.3.1	2.71428	0.0072834	0.0345714	Calcium-binding EF-hand family protein-like (AHRD V3.3 *** Q6ZFI7_ORYSJ)	FALSE
Solyc07g044970.1.1	2.70907	6.9323e-06	0.000103003	P-loop containing nucleoside triphosphate hydrolase (AHRD V3.3 *** A0A2U1P4X5_ARTAN),Pfam:PF13671	FALSE
Solyc11g011740.1.1	2.66596	9.99441e-09	3.11564e-07	Ethylene-responsive transcription factor (AHRD V3.3 *** F1DGA5_COFAR)	TRUE
Solyc09g097950.3.1	2.65811	0.00567537	0.0284446	NAD(P)-linked oxidoreductase, aldo/keto reductase family protein (AHRD V3.3 *-* A0A1Y1HY98_KLENI)	FALSE
Solyc12g042530.2.1	2.64204	0.00667786	0.032378	Phosphatidylinositol-glycan biosynthesis class F protein (AHRD V3.3 *** A0A1J3EIG4_NOCCA)	FALSE
Solyc09g073030.4.1	2.62583	8.62994e-08	2.05746e-06	Unknown protein	TRUE
Solyc09g097770.3.1	2.62401	8.30888e-05	0.000865973	Cell wall protein (AHRD V3.3 *** Q40142_SOLLC)	FALSE
Solyc01g102910.4.1	2.55164	5.58454e-06	8.55834e-05	Germin-like protein subfamily 1 member (AHRD V3.3 *** A0A2K3JPE5_TRIPR)	FALSE
Solyc02g067085.1.1	2.53297	0.00347718	0.0193607	Unknown protein	FALSE
Solyc02g061850.4.1	2.52815	0.0102048	0.0450922	Phospholipase D (AHRD V3.3 *** K4B675_SOLLC)	TRUE
Solyc09g074780.3.1	2.52043	3.22767e-06	5.25341e-05	Protein indeterminate-domain 2 (AHRD V3.3 *** A0A1U8G2Y2_CAPAN)	TRUE
Solyc09g059997.1.1	2.5177	3.32098e-07	6.87123e-06	Histone-lysine N-methyltransferase ASHH1 (AHRD V3.3 *** A0A1U8H996_CAPAN)	FALSE
Solyc06g065720.1.1	2.51715	0.000778028	0.00565006	Cytochrome, and DOMON domain-containing protein (AHRD V3.3 *** A0A2G2WKK0_CAPBA)	FALSE
Solyc10g055740.2.1	2.51564	0.0102755	0.0453471	lysine histidine transporter-like 8 (AHRD V3.3 *** A0A2I4HTG9_9ROSI)	FALSE
Solyc01g044558.1.1	2.46714	0.00029406	0.00250713	Cyclin-A1-1 (AHRD V3.3 *-* A0A1U8GEH4_CAPAN)	FALSE
Solyc03g006150.2.1	2.4657	1.17881e-05	0.000161644	Myb domain, Homeodomain-like protein (AHRD V3.3 *-* A0A2U1Q384_ARTAN)	TRUE
Solyc01g102790.3.1	2.44798	0.00880822	0.0400947	Pentatricopeptide repeat-containing protein (AHRD V3.3 *** A0A1U8E6I7_CAPAN)	FALSE
Solyc06g005820.3.1	2.44041	0.00212712	0.0130679	Copper transporter 6 (AHRD V3.3 *** A0A2G2Z865_CAPAN)	FALSE
Solyc08g077910.3.1	2.42806	6.08889e-06	9.23012e-05	Expansin-like B1 (AHRD V3.3 *** A0A2G2VI71_CAPBA)	FALSE
Solyc09g098770.2.1	2.41911	9.21787e-06	0.000131291	Geraniol 8-hydroxylase (AHRD V3.3 *** A0A2G3CQY8_CAPCH)	FALSE
Solyc03g119960.3.1	2.41893	0.00509182	0.0261829	NPH3 domain (AHRD V3.3 *** A0A200Q7U6_9MAGN)	TRUE
Solyc01g020357.1.1	2.39018	0.0113191	0.0487729	Unknown protein	FALSE
Solyc01g009580.2.1	2.37424	4.67324e-06	7.27334e-05	Terminal flower 1 (AHRD V3.3 *** A0A2Z4I2Q4_CITLI)	FALSE
Solyc02g088650.1.1	2.36667	1.03284e-09	4.02767e-08	Pentatricopeptide repeat-containing protein (AHRD V3.3 *** A0A2G3D998_CAPCH)	FALSE
Solyc09g066150.2.1	2.36115	0.00287484	0.0166614	Cytochrome P450 (AHRD V3.3 *** A0A200Q4A2_9MAGN)	FALSE
Solyc01g111540.4.1	2.35942	0.000595102	0.00451873	Beta-galactosidase (AHRD V3.3 *** A0A2G3ATV6_CAPCH)	FALSE
Solyc07g054810.1.1	2.3572	0.00488065	0.0252982	Unknown protein	TRUE
Solyc04g078300.3.1	2.33359	0.000295572	0.00251872	MADS-box transcription factor (AHRD V3.3 *** A0A2K3PNN3_TRIPR)	TRUE
Solyc02g086223.1.1	2.31636	0.00245295	0.0146243	Unknown protein	FALSE
Solyc04g074120.4.1	2.30746	0.00685283	0.0329602	synaptonemal complex protein 1-like (AHRD V3.3 *** A0A2I4GFH1_9ROSI)	TRUE
Solyc03g006120.4.1	2.2954	0.000445252	0.00355998	Transcription factor TGA like domain (AHRD V3.3 *** A0A200Q9U0_9MAGN)	FALSE
Solyc03g005980.3.1	2.27184	0.000301948	0.00256162	NOD26-like intrinsic protein 1.1	FALSE
Solyc07g008020.3.1	2.27081	6.42196e-05	0.000699184	auxin-regulated 35	TRUE
Solyc03g097855.1.1	2.26967	0.00760203	0.0357202	Unknown protein	FALSE
Solyc02g084640.4.1	2.26317	1.19725e-06	2.12868e-05	Aldehyde dehydrogenase (AHRD V3.3 *** A0A1U8FMX3_CAPAN)	FALSE
Solyc08g082550.1.1	2.23565	2.1527e-17	3.99678e-15	F-box protein (AHRD V3.3 *-* A0A2K3P6V3_TRIPR)	FALSE
Solyc09g011560.3.1	2.23234	1.39358e-08	4.17677e-07	Glutathione S-transferase (AHRD V3.3 *** C0LF68_CAPAN)	FALSE
Solyc06g062540.3.1	2.22638	1.29394e-06	2.27933e-05	phosphatase (psi14C gene)	FALSE
Solyc06g072870.1.1	2.18083	2.95394e-08	8.13262e-07	Glycosyltransferase (AHRD V3.3 *** A0A2G3CA94_CAPCH)	TRUE
Solyc02g082880.2.1	2.17913	9.54092e-05	0.000970749	AMP-dependent synthetase/ligase (AHRD V3.3 *** A0A200QNF3_9MAGN)	TRUE
Solyc07g056500.4.1	2.17844	6.27999e-11	3.2057e-09	glutathione S-transferase T5	FALSE
Solyc07g062100.4.1	2.17482	0.000957679	0.00671313	Histone-lysine N-methyltransferase ATX1 (AHRD V3.3 *** A0A2I0W3M9_9ASPA)	TRUE
Solyc12g094710.2.1	2.17105	1.71966e-13	1.49358e-11	AT-hook motif nuclear-localized protein 10 (AHRD V3.3 *-* A0A2G3B4F7_CAPCH)	TRUE
Solyc08g014310.3.1	2.15725	0.0059107	0.0294133	Spermidine synthase (AHRD V3.3 *** A0A088DA02_CAPAN),Pfam:PF01564	TRUE
Solyc10g076210.2.1	2.15696	4.35041e-10	1.86268e-08	Peroxidase (AHRD V3.3 *** K4D1W3_SOLLC)	TRUE
Solyc10g085210.2.1	2.11469	0.00656979	0.0319504	Transcription factor (AHRD V3.3 *** A0A2U1NHT6_ARTAN)	TRUE
Solyc08g066420.1.1	2.10919	2.69374e-09	9.40344e-08	Polyketide cyclase/dehydrase and lipid transport superfamily protein (AHRD V3.3 *** A0A2U1PZR8_ARTAN)	TRUE
Solyc12g049250.2.1	2.09584	0.00698624	0.0334388	Unknown protein	FALSE
Solyc09g072790.3.1	2.08551	0.00590857	0.0294097	RNA-binding (RRM/RBD/RNP motifs) family protein (AHRD V3.3 *-* F4K4W6_ARATH)	TRUE
Solyc02g079920.3.1	2.07082	2.18427e-08	6.24333e-07	Zinc finger, C2H2 (AHRD V3.3 *** A0A2U1PE02_ARTAN)	TRUE
Solyc06g074390.3.1	2.0682	0.000417302	0.00339078	Fatty acyl-CoA reductase (AHRD V3.3 *** A0A1U8H367_CAPAN)	FALSE
Solyc07g056640.1.1	2.06796	7.80041e-13	5.951e-11	Unknown protein	FALSE
Solyc12g056750.3.1	2.06443	0.00226394	0.0137435	WRKY transcription factor 61	FALSE
Solyc07g054950.2.1	2.05678	0.00726832	0.0345119	cyclinD6_1	FALSE
Solyc09g082480.2.1	2.05638	0.00505054	0.0260089	protein RDM1 (AHRD V3.3 *** A0A2G2XXG5_CAPAN)	FALSE
Solyc04g008940.4.1	2.05473	0.000111202	0.00110885	GRAM domain-containing protein (AHRD V3.3 *** A0A1Q3B313_CEPFO)	FALSE
Solyc01g087410.4.1	2.04058	5.75137e-05	0.000635741	Zinc finger, FYVE/PHD-type (AHRD V3.3 *-* A0A2U1NX02_ARTAN)	TRUE
Solyc08g014330.3.1	2.03443	4.49446e-07	9.0147e-06	Amine oxidase (AHRD V3.3 *** A4GZ88_TOBAC)	TRUE
Solyc11g013250.1.1	2.03176	0.00797821	0.0370973	C2 calcium-dependent membrane targeting (AHRD V3.3 *** A0A2U1MZ85_ARTAN)	TRUE
Solyc10g086200.1.1	2.01394	0.00637429	0.0312136	SAUR-like auxin-responsive protein family (AHRD V3.3 *** A0A2U1QCM8_ARTAN)	FALSE
Solyc11g068970.2.1	2.00884	0.00105838	0.00730899	Aluminum-activated malate transporter 1 (AHRD V3.3 *** A0A2G2YH04_CAPAN)	FALSE
Solyc06g053520.4.1	2.00805	0.00757898	0.0356278	Spermidine synthase (AHRD V3.3 *** A0A2G3B8N0_CAPCH),Pfam:PF01564	FALSE
Solyc09g097990.1.1	2.00132	0.00608222	0.0300459	Aldo/keto reductase (AHRD V3.3 *-* A0A2K3PHH9_TRIPR)	FALSE
Solyc06g050870.3.1	1.99933	0.00678761	0.0327215	Hypoxia-responsive family protein (AHRD V3.3 *** B6THW4_MAIZE)	FALSE
Solyc03g093140.3.1	1.99427	6.77041e-37	2.84086e-33	Glycerol-3-phosphate transporter 1-like protein (AHRD V3.3 *** A0A2K3PR18_TRIPR)	FALSE
Solyc09g074430.4.1	1.99201	1.28071e-18	3.05333e-16	Flavin-containing monooxygenase (AHRD V3.3 *** D2IGV5_SOLLC)	FALSE
Solyc07g005230.2.1	1.98208	1.27215e-15	1.74442e-13	Unknown protein	FALSE
Solyc06g076800.3.1	1.97438	3.26851e-07	6.78271e-06	Cytochrome P450 (AHRD V3.3 *** A0A200R4M3_9MAGN)	FALSE
Solyc05g009860.3.1	1.97344	0.00285489	0.016564	leucoanthocyanidin reductase-like (AHRD V3.3 *-* A0A2I4FWR0_9ROSI)	FALSE
Solyc08g077950.1.1	1.97079	0.000956262	0.00671129	Aquaporin-like protein (AHRD V3.3 *-* A0A2U1NPJ5_ARTAN)	TRUE
Solyc10g008247.1.1	1.95169	0.00139419	0.00918659	transcription factor bHLH36-like (AHRD V3.3 *** A0A2I4FJG0_9ROSI)	TRUE
Solyc08g077820.4.1	1.94884	0.000745203	0.00544941	Cationic amino acid transporter (AHRD V3.3 *** S8DTC6_9LAMI)	FALSE
Solyc08g007800.3.1	1.94416	0.00779145	0.0364388	SPX domain-containing protein (AHRD V3.3 *** D7MDY2_ARALL)	TRUE
Solyc08g081740.3.1	1.94309	8.70513e-05	0.000898787	P-loop containing nucleoside triphosphate hydrolases superfamily protein (AHRD V3.3 *** A0A2U1Q760_ARTAN)	TRUE
Solyc07g021630.3.1	1.92678	0.0065073	0.0317274	SlBCAT2	FALSE
Solyc01g005470.3.1	1.91737	2.86136e-06	4.71458e-05	protein PLANT CADMIUM RESISTANCE 2-like (AHRD V3.3 *** A0A1U8ETE7_CAPAN)	FALSE
Solyc08g067460.1.1	1.90937	0.00237769	0.0142934	Pre-mRNA-splicing factor syf2 (AHRD V3.3 *** A0A1J3JVC4_NOCCA)	TRUE
Solyc04g078450.4.1	1.90439	1.11302e-07	2.5774e-06	Unknown protein	TRUE
Solyc12g009480.2.1	1.89003	2.40195e-17	4.42042e-15	SPX domain-containing protein (AHRD V3.3 *** A0A1Q3BK26_CEPFO)	TRUE
Solyc03g097870.4.1	1.86838	0.000436124	0.00350404	Bidirectional sugar transporter SWEET (AHRD V3.3 *** M1D7G9_SOLTU)	FALSE
Solyc01g109790.3.1	1.86427	6.78318e-15	8.08586e-13	ADP-glucose pyrophosphorylase large subunit 1	FALSE
Solyc08g060920.4.1	1.86305	8.88441e-26	9.31975e-23	IDS4-like	TRUE
Solyc10g051120.3.1	1.85293	0.00538678	0.0272719	Mitochondrial pyruvate carrier (AHRD V3.3 *** A0A2G2WMA1_CAPBA)	FALSE
Solyc01g095110.4.1	1.84686	0.00909435	0.0411383	Pentatricopeptide repeat-containing protein (AHRD V3.3 *** A0A1J3JYF9_NOCCA)	FALSE
Solyc12g013700.2.1	1.84525	0.000897803	0.00636563	stem-specific protein TSJT1-like (AHRD V3.3 *** A0A2I4H4H1_9ROSI)	FALSE
Solyc08g014490.1.1	1.84227	9.74037e-12	5.82202e-10	HXXXD-type acyl-transferase family protein (AHRD V3.3 *** F4JBC7_ARATH)	FALSE
Solyc09g073040.3.1	1.83943	0.00419553	0.0225467	Unknown protein	TRUE
Solyc02g091690.3.1	1.83449	1.8661e-09	6.89273e-08	bHLH transcription factor 081	TRUE
Solyc12g005380.3.1	1.83171	0.00777354	0.0363956	Diacylglycerol kinase (AHRD V3.3 *** A0A1U8FQ95_CAPAN)	TRUE
Solyc07g007755.1.1	1.82137	6.60351e-07	1.26753e-05	Defensin protein (AHRD V3.3 *** B1N681_SOLPI)	FALSE
Solyc09g061410.1.1	1.8095	8.4675e-05	0.000879011	CLAVATA3/ESR (CLE)-related protein 41-like (AHRD V3.3 --* XP_022856139.1)	TRUE
Solyc01g110340.4.1	1.80874	0.00196377	0.0122074	Endoglucanase (AHRD V3.3 *** A0A218XGM2_PUNGR)	TRUE
Solyc09g014350.3.1	1.79738	0.000411282	0.00335486	Glycerol-3-phosphate acyltransferase, expressed (AHRD V3.3 *** D8L9N9_WHEAT)	TRUE
Solyc10g078270.2.1	1.79504	6.72393e-08	1.6655e-06	WAT1-related protein (AHRD V3.3 *** K4D269_SOLLC)	FALSE
Solyc12g014010.2.1	1.79173	0.00585496	0.02924	Glycosyltransferase (AHRD V3.3 *** Q94IF2_TOBAC)	TRUE
Solyc01g105350.3.1	1.79167	1.01357e-08	3.15034e-07	Glycosyltransferase (AHRD V3.3 *** A0A1Q3B719_CEPFO)	FALSE
Solyc09g092480.1.1	1.78489	1.94758e-09	7.16848e-08	Glycosyltransferase (AHRD V3.3 *** A0A2I4GJH4_9ROSI)	FALSE
Solyc01g067850.2.1	1.7824	4.1883e-05	0.00048201	Peroxidase (AHRD V3.3 *** K4AX33_SOLLC)	FALSE
Solyc01g066910.3.1	1.77842	3.17108e-05	0.000380384	Bifunctional inhibitor/plant lipid transfer protein/seed storage helical domain containing protein (AHRD V3.3 *** A0A2P5CY45_TREOI)	FALSE
Solyc12g010670.1.1	1.764	1.1435e-08	3.50228e-07	E3 ubiquitin-protein ligase RMA1H1 (AHRD V3.3 *** A0A1U8FIB2_CAPAN)	FALSE
Solyc04g014730.4.1	1.74627	5.06959e-06	7.82058e-05	Fumarylacetoacetase (AHRD V3.3 *** A0A1U8GL68_CAPAN)	TRUE
Solyc03g083100.3.1	1.7452	1.31232e-07	2.98294e-06	SUN-like protein 10	TRUE
Solyc12g005990.2.1	1.74058	9.92913e-42	6.94377e-38	Protein-tyrosine-phosphatase IBR5 (AHRD V3.3 *** A0A1U8E2D0_CAPAN)	TRUE
Solyc11g069240.2.1	1.73919	1.14706e-10	5.457e-09	Protein indeterminate-domain 2 (AHRD V3.3 *** A0A2G3BBG6_CAPCH)	TRUE
Solyc12g088140.2.1	1.7325	8.84292e-06	0.000126759	Hydroxyproline-rich glycoprotein (AHRD V3.3 *** A0A2K3L507_TRIPR)	FALSE
Solyc01g067860.3.1	1.72359	3.13279e-08	8.55807e-07	Peroxidase (AHRD V3.3 *** K4AX34_SOLLC)	TRUE
Solyc11g068620.2.1	1.71436	4.86924e-10	2.06377e-08	NAC domain (AHRD V3.3 *** A0A200Q6H1_9MAGN)	FALSE
Solyc03g044350.3.1	1.70678	0.00094406	0.00663975	Transcription elongation factor (AHRD V3.3 *** A0A200Q6X7_9MAGN)	TRUE
Solyc08g068150.4.1	1.70582	0.00391042	0.0212651	BURP domain-containing protein (AHRD V3.3 *-* A0A2U1QID7_ARTAN)	TRUE
Solyc07g008230.1.1	1.705	6.71656e-16	9.52117e-14	Glycosyltransferase (AHRD V3.3 *** A0A2I4GJH4_9ROSI)	FALSE
Solyc10g076270.3.1	1.69776	0.000604365	0.00457416	Regulatory-associated protein of TOR 1 (AHRD V3.3 *-* A0A2G2VZ40_CAPBA)	TRUE
Solyc05g018130.3.1	1.69195	7.91198e-08	1.91678e-06	2-oxoglutarate (2OG) and Fe(II)-dependent oxygenase superfamily protein (AHRD V3.3 *** B4FBV2_MAIZE)	TRUE
Solyc02g080510.1.1	1.68847	2.75752e-17	5.03068e-15	Senescence regulator S40 (AHRD V3.3 *** A0A200Q815_9MAGN)	TRUE
Solyc05g005170.4.1	1.68245	0.00414399	0.0223212	Pectin lyase-like superfamily protein (AHRD V3.3 *** O22699_ARATH)	TRUE
Solyc03g112750.4.1	1.67972	0.00392579	0.0213431	protein TORNADO 1 (AHRD V3.3 *** A0A2I4DZR4_9ROSI)	TRUE
Solyc10g017510.3.1	1.67573	7.10826e-08	1.74627e-06	Cytochrome (AHRD V3.3 *** A0A1U8EF26_CAPAN)	FALSE
Solyc11g005820.1.1	1.66429	0.000957693	0.00671313	Pectinesterase inhibitor domain-containing protein (AHRD V3.3 *** A0A2U1P2H7_ARTAN)	FALSE
Solyc11g011300.2.1	1.66192	0.00413937	0.0223077	Rhamnogalacturonate lyase (AHRD V3.3 *** A0A200QXQ6_9MAGN)	FALSE
Solyc02g078340.4.1	1.66085	0.00470845	0.0246036	Heat stress transcription factor B-2b (AHRD V3.3 *** A0A2G3D674_CAPCH)	TRUE
Solyc03g007530.3.1	1.65899	3.10457e-15	4.02061e-13	ABC transporter C family member 10 (AHRD V3.3 *** A0A2G2ZZN1_CAPAN)	TRUE
Solyc03g111140.3.1	1.65849	0.00015489	0.00145461	Malate synthase (AHRD V3.3 *** A0A1U8FXE5_CAPAN)	TRUE
Solyc07g008440.3.1	1.64738	0.00190299	0.0119249	Purine permease (AHRD V3.3 *** A0A2R6QYE6_ACTCH),Pfam:PF16913	FALSE
Solyc09g098000.4.1	1.64037	6.9128e-06	0.000102786	NAD(P)-linked oxidoreductase, aldo/keto reductase family protein (AHRD V3.3 *** A0A1Y1HY98_KLENI)	TRUE
Solyc06g059850.2.1	1.6382	0.00204353	0.0126247	2-oxoisovalerate dehydrogenase subunit alpha 2, mitochondrial (AHRD V3.3 *** A0A2G2WJC6_CAPBA)	FALSE
Solyc01g068490.4.1	1.63784	0.000525468	0.00408459	RING-type E3 ubiquitin transferase (AHRD V3.3 *** A0A200RD53_9MAGN)	TRUE
Solyc04g051490.3.1	1.63745	0.00200906	0.012452	Crossover junction endonuclease EME1B (AHRD V3.3 *** A0A2G2VFP4_CAPBA)	TRUE
Solyc04g079910.4.1	1.63622	7.42195e-07	1.39778e-05	Calcium uniporter protein 4, mitochondrial (AHRD V3.3 *** A0A2G3CPZ7_CAPCH)	FALSE
Solyc09g075043.1.1	1.63477	0.00304471	0.0174913	Unknown protein	FALSE
Solyc03g032080.4.1	1.6307	0.00154287	0.0100029	Auxin efflux carrier (AHRD V3.3 *** A0A200PYL2_9MAGN)	FALSE
Solyc06g073760.3.1	1.62745	0.00207179	0.0127767	Glycosyl hydrolase family protein (AHRD V3.3 *** A0A1P8BG25_ARATH)	FALSE
Solyc08g006020.4.1	1.62406	0.00965655	0.043141	NAC domain-containing protein (AHRD V3.3 *** A0A2G3AGF8_CAPAN)	TRUE
Solyc12g096980.3.1	1.62085	1.21216e-05	0.000165137	auxin-regulated IAA11	TRUE
Solyc05g013190.4.1	1.61224	2.30016e-07	4.93935e-06	Ribosomal L32p protein family (AHRD V3.3 *-* Q5Q0D8_ARATH)	TRUE
Solyc04g007050.4.1	1.61096	2.58993e-15	3.46093e-13	Disease resistance protein (AHRD V3.3 *** A0A2U1N8H9_ARTAN)	TRUE
Solyc03g117520.3.1	1.61052	0.00122545	0.00827156	Protein FAR1-RELATED SEQUENCE 6 (AHRD V3.3 *** A0A2G2WQF9_CAPBA)	FALSE
Solyc10g076220.3.1	1.60706	6.91967e-08	1.70794e-06	Peroxidase (AHRD V3.3 *** K4D1W4_SOLLC)	TRUE
Solyc01g006380.2.1	1.59546	0.000151932	0.00143141	RING-type E3 ubiquitin transferase (AHRD V3.3 *-* A0A2U1P546_ARTAN)	TRUE
Solyc06g050360.3.1	1.5916	0.00894499	0.0405852	Unknown protein	TRUE
Solyc03g096380.3.1	1.5817	0.0010849	0.00746511	proline transporter 2	FALSE
Solyc06g068230.4.1	1.58055	8.95415e-06	0.000127969	Tetratricopeptide repeat (TPR)-like superfamily protein (AHRD V3.3 *** A0A2U1MYN5_ARTAN)	TRUE
Solyc06g008620.1.1	1.57373	0.0105079	0.0461011	TolB protein-related protein (AHRD V3.3 *** A0A2U1LVX5_ARTAN)	TRUE
Solyc09g090080.1.1	1.56307	3.31256e-05	0.000394872	Phosphate transporter (AHRD V3.3 *** Q9AYT3_TOBAC)	TRUE
Solyc04g056310.3.1	1.55427	3.8973e-06	6.23687e-05	MYB transcription factor (AHRD V3.3 *-* A0A0U3IU11_MESCR)	TRUE
Solyc01g112120.4.1	1.55361	0.000904944	0.00641193	Flavin-containing monooxygenase (AHRD V3.3 *** A0A2G2XYN9_CAPAN)	FALSE
Solyc04g080650.4.1	1.55325	0.00556242	0.0279604	Cytochrome P450 (AHRD V3.3 *-* A0A200QE46_9MAGN)	TRUE
Solyc11g066140.2.1	1.54873	1.99235e-11	1.11465e-09	Para-hydroxybenzoic acid efflux pump subunit AaeB/fusaric acid resistance protein (AHRD V3.3 *** A0A200R6L7_9MAGN)	FALSE
Solyc03g083320.4.1	1.53587	4.65346e-12	3.07011e-10	calcium sensor calcineurin B	FALSE
Solyc11g071720.2.1	1.5342	1.94173e-09	7.15948e-08	Alpha/beta-Hydrolases superfamily protein (AHRD V3.3 *** A0A1P8BCJ0_ARATH)	FALSE
Solyc08g078150.1.1	1.53058	2.52494e-09	8.9331e-08	Pentatricopeptide repeat-containing protein (AHRD V3.3 *** A0A2U1NFL7_ARTAN)	FALSE
Solyc11g011750.1.1	1.53051	0.000113838	0.0011287	Ethylene-responsive transcription factor 1B (AHRD V3.3 *** A0A2G2Y507_CAPAN)	TRUE
Solyc12g035400.2.1	1.52928	1.62167e-22	8.72376e-20	WAT1-related protein (AHRD V3.3 *** K4DE01_SOLLC)	FALSE
Solyc06g006080.3.1	1.52655	6.37206e-10	2.63161e-08	Phosphomethylpyrimidine synthase (AHRD V3.3 *** A0A2G3C580_CAPCH)	TRUE
Solyc07g008380.2.1	1.52524	0.00764212	0.0358684	HXXXD-type acyl-transferase family protein (AHRD V3.3 *** F4JBC7_ARATH)	FALSE
Solyc09g061760.1.1	1.52052	1.49209e-11	8.57645e-10	Pentatricopeptide repeat-containing protein, mitochondrial (AHRD V3.3 *** A0A2G3DBN2_CAPCH)	FALSE
Solyc12g044730.2.1	1.5159	5.02965e-11	2.65799e-09	40S ribosomal protein S15a (AHRD V3.3 *** B6U773_MAIZE)	FALSE
Solyc02g071130.4.1	1.51584	0.00243566	0.014546	WRKY transcription factor 71	TRUE
Solyc06g051950.4.1	1.51023	5.33772e-20	1.65305e-17	Nuclear migration protein nudC (AHRD V3.3 *** A0A2G2Z984_CAPAN)	TRUE
Solyc09g072880.3.1	1.50436	0.000153077	0.00144016	Protein FLUORESCENT IN BLUE LIGHT, chloroplastic (AHRD V3.3 *** A0A1U8GA42_CAPAN)	FALSE
Solyc04g005170.1.1	1.50224	0.00191765	0.0119882	Basic leucine zipper 43 (AHRD V3.3 *** A0A1U8H2I2_CAPAN)	TRUE
Solyc03g115880.1.1	1.50083	0.000305001	0.00258647	Unknown protein	TRUE
Solyc03g097590.4.1	1.5003	1.7772e-07	3.89609e-06	Bidirectional sugar transporter SWEET (AHRD V3.3 *** M1D4D4_SOLTU)	FALSE
Solyc04g014770.1.1	1.49949	3.5009e-13	2.81414e-11	Unknown protein	FALSE
Solyc10g084600.2.1	1.48434	8.21506e-09	2.61974e-07	Plant protein 1589 of Uncharacterized protein function (AHRD V3.3 *-* A0A061EZD3_THECC)	TRUE
Solyc03g115930.3.1	1.48096	1.61807e-09	6.07283e-08	Calcium-binding EF-hand family protein (AHRD V3.3 *-* A0A2U1NCV0_ARTAN)	FALSE
Solyc03g025125.1.1	1.48013	0.000214995	0.00193008	Unknown protein	FALSE
Solyc04g078340.3.1	1.4789	7.34147e-08	1.79306e-06	Cytochrome P450 (AHRD V3.3 *-* A0A200QZM5_9MAGN)	FALSE
Solyc01g100900.4.1	1.47855	4.46573e-11	2.384e-09	WAT1-related protein (AHRD V3.3 *** K4B1C1_SOLLC)	FALSE
Solyc09g092500.1.1	1.476	2.47155e-08	6.96951e-07	UDP-glycosyltransferase 75C1 (AHRD V3.3 *** U75C1_SOLLC)	FALSE
Solyc12g019120.2.1	1.47252	9.82622e-05	0.000996877	Pectin lyase-like superfamily protein (AHRD V3.3 *** O80559_ARATH)	FALSE
Solyc02g063030.4.1	1.47242	2.2712e-05	0.000284306	Mental retardation GTPase activating protein (AHRD V3.3 *** A0A1I9LSH4_ARATH)	TRUE
Solyc06g069020.4.1	1.47081	3.15971e-14	3.33119e-12	Elongation factor (AHRD V3.3 *** A0A200PY18_9MAGN)	TRUE
Solyc10g049515.1.1	1.47004	0.00298508	0.0172147	Unknown protein	FALSE
Solyc12g089110.1.1	1.46798	6.6162e-18	1.32198e-15	Unknown protein	FALSE
Solyc04g077650.3.1	1.45325	2.58256e-07	5.48957e-06	Serine carboxypeptidase-like 17 (AHRD V3.3 *** A0A2G2ZRB2_CAPAN)	FALSE
Solyc04g051600.4.1	1.4525	7.67587e-06	0.000112301	tRNA(His) guanylyltransferase 1 (AHRD V3.3 *** A0A1U8DYC8_CAPAN)	FALSE
Solyc06g069300.1.1	1.45064	0.00195192	0.0121589	Protein MIZU-KUSSEI 1 (AHRD V3.3 *** A0A2G2WLS1_CAPBA)	TRUE
Solyc04g078460.3.1	1.44608	1.55168e-07	3.45588e-06	Isoaspartyl peptidase/L-asparaginase (AHRD V3.3 *** A0A1U8GBV5_CAPAN)	TRUE
Solyc12g005645.1.1	1.43616	7.44381e-07	1.39813e-05	Unknown protein	TRUE
Solyc03g065250.4.1	1.43098	0.000301667	0.00256056	Fatty acid hydroxylase superfamily (AHRD V3.3 *** A0A2U1L8N4_ARTAN)	FALSE
Solyc01g005090.3.1	1.43052	8.74854e-13	6.60231e-11	Type I inositol polyphosphate 5-phosphatase 5 (AHRD V3.3 *-* IP5P5_ARATH)	FALSE
Solyc06g072400.3.1	1.4304	1.06715e-12	7.93927e-11	Type I inositol polyphosphate 5-phosphatase 5 (AHRD V3.3 *-* IP5P5_ARATH)	FALSE
Solyc07g056470.3.1	1.42624	4.78917e-05	0.000539413	Glutathione S-transferase-like protein (AHRD V3.3 *** A0A2K3N2T5_TRIPR)	FALSE
Solyc04g082120.3.1	1.42563	0.000124072	0.00121297	Prolyl oligopeptidase (AHRD V3.3 *** H2D7F1_COFAR)	FALSE
Solyc12g036120.1.1	1.42025	0.00206947	0.0127698	ABC transporter C family member 2 (AHRD V3.3 *-* A0A2G3DGG8_CAPCH)	FALSE
Solyc01g090630.4.1	1.41901	2.13869e-21	8.97392e-19	2-oxoglutarate (2OG) and Fe(II)-dependent oxygenase superfamily protein (AHRD V3.3 *** Q9C938_ARATH)	FALSE
Solyc04g010330.3.1	1.41456	0.00996133	0.0442866	Auxin-regulated protein	TRUE
Solyc11g072140.3.1	1.41393	0.00720381	0.0342867	Protein kinase domain (AHRD V3.3 *** A0A200PR58_9MAGN)	FALSE
Solyc06g071580.3.1	1.41251	0.00419147	0.0225306	ATPase, histidine kinase, DNA gyrase B-, and HSP90-like domain containing protein, expressed (AHRD V3.3 *** Q33AG5_ORYSJ)	TRUE
Solyc05g041200.4.1	1.41037	0.00199195	0.0123569	4-hydroxyphenylpyruvate dioxygenase (AHRD V3.3 *** A0A2G2WSP4_CAPBA)	TRUE
Solyc12g011300.2.1	1.41004	2.43527e-08	6.87644e-07	Glutathione S-transferase (AHRD V3.3 *** Q9FQE8_SOYBN)	FALSE
Solyc11g067190.3.1	1.40796	0.0110274	0.0478103	Fatty acyl-CoA reductase (AHRD V3.3 *** A0A2G3BAW0_CAPCH)	FALSE
Solyc10g080730.3.1	1.40072	0.0049516	0.0256125	Thioredoxin-like 1-1, chloroplastic (AHRD V3.3 *** A0A2G2YNL4_CAPAN)	FALSE
Solyc11g062370.1.1	1.39809	6.12945e-22	2.92263e-19	Stomatal closure-related actin-binding protein 1 (AHRD V3.3 *** A0A1U8EIL0_CAPAN)	TRUE
Solyc09g092490.3.1	1.39228	0.000298776	0.0025419	Glycosyltransferase (AHRD V3.3 *-* A0A2I4GJH4_9ROSI)	FALSE
Solyc01g096970.3.1	1.39087	0.00465727	0.02447	Unknown protein	FALSE
Solyc09g075970.3.1	1.38851	0.0082525	0.0381612	Sec14p-like phosphatidylinositol transfer family protein (AHRD V3.3 *** F4I8Q8_ARATH)	TRUE
Solyc06g006000.3.1	1.37747	0.000624944	0.00470615	Maternal effect embryo arrest 59 (AHRD V3.3 *** B6T4K8_MAIZE)	TRUE
Solyc01g068410.4.1	1.37593	0.000500834	0.00392734	SlPIN5	FALSE
Solyc04g080990.2.1	1.3753	6.80779e-06	0.000101512	S-type anion channel SLAH1 (AHRD V3.3 *** A0A2G3CQY6_CAPCH)	FALSE
Solyc11g066400.1.1	1.37459	7.2201e-05	0.000769081	Zinc finger protein (AHRD V3.3 *** A0A200R5F9_9MAGN)	TRUE
Solyc10g009230.1.1	1.37187	0.00565867	0.0283787	death domain associated protein (AHRD V3.3 --* AT2G46735.1)	TRUE
Solyc01g105070.3.1	1.36981	0.000751548	0.00549007	LECEVI16G peroxidase precursor	TRUE
Solyc04g007030.4.1	1.3669	5.05694e-12	3.29852e-10	Disease resistance protein (AHRD V3.3 *** A0A2U1N8H9_ARTAN)	FALSE
Solyc01g095220.2.1	1.35976	6.15917e-12	3.92764e-10	Unknown protein	FALSE
Solyc07g056480.3.1	1.35636	1.01131e-06	1.83224e-05	glutathione S-transferase/peroxidase	FALSE
Solyc04g008950.4.1	1.34834	0.00164897	0.0105506	GRAM domain-containing protein (AHRD V3.3 *** A0A1Q3B313_CEPFO)	FALSE
Solyc08g082000.4.1	1.34454	8.76004e-06	0.000125771	hypothetical protein (AHRD V3.3 *-* AT5G53220.7)	TRUE
Solyc08g005190.4.1	1.34379	4.59023e-07	9.18875e-06	Pre-mRNA-splicing factor CWC22-like protein (AHRD V3.3 *** A0A2G3BQE7_CAPCH)	TRUE
Solyc01g005910.3.1	1.34373	1.35022e-07	3.05584e-06	Acid phosphatase/vanadium-dependent haloperoxidase-related protein (AHRD V3.3 *** A0A2U1NM03_ARTAN)	TRUE
Solyc01g067895.1.1	1.34091	0.000768968	0.00559589	Unknown protein	TRUE
Solyc10g077100.1.1	1.33973	4.78931e-13	3.76328e-11	Plant organelle RNA recognition domain containing protein (AHRD V3.3 *** A0A2P5FBL3_TREOI)	TRUE
Solyc02g071870.4.1	1.33516	0.000132305	0.00127915	Protein kinase domain (AHRD V3.3 *** A0A200QV78_9MAGN)	TRUE
Solyc08g007000.3.1	1.33493	0.00192791	0.0120416	Protein phosphatase 2C (AHRD V3.3 *** A0A2U1P5P3_ARTAN)	TRUE
Solyc11g011110.3.1	1.3348	0.00503452	0.025964	GDSL esterase/lipase (AHRD V3.3 *** A0A1U8GTX9_CAPAN)	FALSE
Solyc05g013690.4.1	1.33464	1.23872e-07	2.84337e-06	GDSL esterase/lipase (AHRD V3.3 *** A0A2R6REU1_ACTCH)	FALSE
Solyc06g069070.1.1	1.33041	5.48683e-05	0.000609712	Bifunctional inhibitor/lipid-transfer protein/seed storage 2S albumin superfamily protein (AHRD V3.3 *** A0A1I9LP30_ARATH)	FALSE
Solyc09g065340.3.1	1.33018	0.000126054	0.00122948	Acyl-CoA N-acyltransferase with RING/FYVE/PHD-type zinc finger protein (AHRD V3.3 *-* A0A2U1KTB4_ARTAN)	TRUE
Solyc01g098990.4.1	1.32425	0.000458828	0.00365354	DUF1995 domain protein%2C putative (DUF1995) (AHRD V3.3 *** AT5G27560.4)	TRUE
Solyc04g005790.3.1	1.32329	0.000575612	0.0044027	Protein NRT1/ PTR FAMILY 4.6 (AHRD V3.3 *** A0A2G2YDU5_CAPAN)	FALSE
Solyc04g014360.3.1	1.31018	0.00465955	0.02447	bHLH transcription factor 032	TRUE
Solyc09g009520.3.1	1.30103	8.9831e-10	3.55595e-08	Alpha/beta-Hydrolases superfamily protein (AHRD V3.3 *** Q9SJM9_ARATH)	TRUE
Solyc03g119820.1.1	1.29952	0.00720368	0.0342867	Oleosin (AHRD V3.3 *** A0A200Q8I2_9MAGN)	TRUE
Solyc09g098030.4.1	1.29912	9.14687e-09	2.88573e-07	Geraniol 8-hydroxylase (AHRD V3.3 *** A0A2G3CQY8_CAPCH)	FALSE
Solyc03g113980.3.1	1.29755	0.00342358	0.019113	Calmodulin binding protein-like (AHRD V3.3 *** A0A200RE12_9MAGN)	TRUE
Solyc07g005680.4.1	1.29692	1.98405e-06	3.35959e-05	Carboxypeptidase (AHRD V3.3 *** A0A2G3BXD7_CAPCH)	FALSE
Solyc05g050820.3.1	1.29562	0.000955436	0.00670851	DnaJ homolog (AHRD V3.3 *** Q9ZWK3_SALGI)	TRUE
Solyc07g045460.3.1	1.2955	0.000298672	0.0025419	SNF1-related protein kinase regulatory subunit beta-2 (AHRD V3.3 *** A0A2G3BYB4_CAPCH)	TRUE
Solyc06g059740.4.1	1.29526	0.00332744	0.0187459	Alcohol dehydrogenase (AHRD V3.3 *** A0A2U1MN94_ARTAN)	FALSE
Solyc02g069170.3.1	1.28845	0.000134019	0.00128978	Transcription initiation factor TFIID subunit 8 (AHRD V3.3 *** A0A1J3F703_NOCCA)	TRUE
Solyc10g084070.1.1	1.28839	0.00124144	0.00835054	Unknown protein	FALSE
Solyc09g082720.3.1	1.28783	1.96338e-11	1.10138e-09	NAD(P)-linked oxidoreductase, aldo/keto reductase family protein (AHRD V3.3 *** A0A1Y1HY98_KLENI)	FALSE
Solyc07g054100.3.1	1.28496	1.15187e-09	4.46696e-08	Pentatricopeptide repeat (AHRD V3.3 *** A0A200QWW0_9MAGN)	FALSE
Solyc03g081230.1.1	1.28454	0.0019116	0.011961	Late embryogenesis abundant (LEA) hydroxyproline-rich glycoprotein family (AHRD V3.3 *** Q9SVC8_ARATH)	FALSE
Solyc03g123400.1.1	1.281	4.64211e-07	9.26655e-06	GRAS16	TRUE
Solyc06g072420.3.1	1.28004	0.00440439	0.0234159	Purple acid phosphatase (AHRD V3.3 *** A0A2G2V7G9_CAPBA)	FALSE
Solyc02g086260.1.1	1.28002	0.00671125	0.0324742	50S ribosomal-like protein (AHRD V3.3 *** Q9C618_ARATH)	TRUE
Solyc09g083090.4.1	1.27277	5.40895e-11	2.8089e-09	Non-specific serine/threonine protein kinase (AHRD V3.3 *** A0A2G2W162_CAPBA)	FALSE
Solyc07g049645.1.1	1.26646	0.000494079	0.00388377	Benzyl alcohol O-benzoyltransferase (AHRD V3.3 *** BEBT_TOBAC)	FALSE
Solyc11g008680.2.1	1.2625	0.00250671	0.0148982	Acyl-[acyl-carrier-protein] desaturase (AHRD V3.3 *** A0A2G3B0E0_CAPCH)	FALSE
Solyc03g097670.4.1	1.25966	2.22102e-13	1.88652e-11	DNA binding,ATP binding protein (AHRD V3.3 *** A0A2U1MGM2_ARTAN)	TRUE
Solyc06g074170.3.1	1.25628	0.0106353	0.0465334	NAC domain-containing protein 40 (AHRD V3.3 *** A0A2G2ZDN9_CAPAN)	TRUE
Solyc01g101050.3.1	1.25256	0.00481734	0.0250354	Peroxidase (AHRD V3.3 *** K4B1D5_SOLLC)	TRUE
Solyc02g093420.4.1	1.25155	0.00180892	0.0114316	NAC domain-containing protein 10 (AHRD V3.3 *** A0A2G3ACK5_CAPAN)	TRUE
Solyc06g008785.1.1	1.25032	0.00630071	0.0309489	Plant resistance protein (AHRD V3.3 *** O81136_SOLLC)	TRUE
Solyc08g078940.1.1	1.24924	0.000538493	0.00416731	Bifunctional inhibitor/lipid-transfer protein/seed storage 2S albumin superfamily protein (AHRD V3.3 *** F4IC43_ARATH)	TRUE
Solyc10g086090.2.1	1.24916	1.58154e-08	4.66678e-07	Ethylene-responsive proteinase inhibitor 1 (AHRD V3.3 *** A0A2G2VU06_CAPBA)	FALSE
Solyc11g006190.3.1	1.24693	2.09251e-06	3.53729e-05	AT-hook motif nuclear-localized protein 1 (AHRD V3.3 *** A0A2G2Y739_CAPAN)	TRUE
Solyc12g006790.3.1	1.24651	0.00360433	0.0198944	Argonaute10b	TRUE
Solyc04g082230.1.1	1.24503	1.66317e-05	0.000216863	SAUR-like auxin-responsive protein family (AHRD V3.3 *** Q9SGR4_ARATH)	FALSE
Solyc08g075760.3.1	1.2443	0.00668929	0.0324114	Protein CYCLOPS (AHRD V3.3 *** CCLOP_MEDTR)	TRUE
Solyc01g090610.3.1	1.24145	7.5946e-24	5.13983e-21	2-oxoglutarate (2OG) and Fe(II)-dependent oxygenase superfamily protein (AHRD V3.3 *** Q9C938_ARATH)	FALSE
Solyc03g120870.3.1	1.24089	0.000130647	0.00126721	CASP-like protein (AHRD V3.3 *** A0A2I4G5I1_9ROSI)	TRUE
Solyc09g007110.3.1	1.23857	5.75644e-07	1.12554e-05	Leucine-rich receptor-like protein kinase family protein (AHRD V3.3 *** A0A0K9PPV4_ZOSMR)	TRUE
Solyc02g071110.3.1	1.23794	0.00277534	0.0161965	Purine permease (AHRD V3.3 *** A0A2R6Q6Y9_ACTCH),Pfam:PF16913	FALSE
Solyc05g015360.2.1	1.23245	3.44447e-08	9.28857e-07	HORMA domain-containing protein (AHRD V3.3 *-* A0A2K3NRQ7_TRIPR)	FALSE
Solyc12g008530.2.1	1.22886	0.000215864	0.00193539	Pectinesterase (AHRD V3.3 *** A0A2G2YV59_CAPAN)	FALSE
Solyc05g051680.4.1	1.22789	0.000696938	0.00513946	Structural maintenance of chromosomes protein 6 (AHRD V3.3 *** A0A2G2WTI5_CAPBA)	TRUE
Solyc04g080600.3.1	1.22721	8.22955e-10	3.29026e-08	Auxilin-like protein 1 (AHRD V3.3 *** A0A2G2V5U3_CAPBA)	TRUE
Solyc05g021390.4.1	1.22211	0.00451275	0.0238422	Cytochrome P450 (AHRD V3.3 *** A0A200R9G0_9MAGN)	FALSE
Solyc04g079940.3.1	1.22157	1.70276e-09	6.35658e-08	NAC domain-containing protein (AHRD V3.3 *** A0A2U1N781_ARTAN)	TRUE
Solyc02g077610.3.1	1.21944	0.00358609	0.0198303	NAC domain protein (AHRD V3.3 *** S5R952_9ROSA)	TRUE
Solyc01g106920.4.1	1.21803	0.00427347	0.0228893	Nucleobase-ascorbate transporter 8 (AHRD V3.3 *** A0A1U8DZ27_CAPAN)	FALSE
Solyc01g096360.3.1	1.2167	4.49156e-05	0.00051158	Rho GTPase-activating protein 3 (AHRD V3.3 *** A0A2G2YYE8_CAPAN)	TRUE
Solyc02g032800.1.1	1.21472	0.00031856	0.0026841	Senescence regulator S40 (AHRD V3.3 *** A0A200QJC6_9MAGN)	TRUE
Solyc06g071780.4.1	1.21192	0.000125347	0.00122372	Drought induced 19 protein-like (AHRD V3.3 *** A0A200RD12_9MAGN)	FALSE
Solyc09g097960.3.1	1.21067	6.69175e-06	0.000100231	NAD(P)-linked oxidoreductase, aldo/keto reductase family protein (AHRD V3.3 *** A0A1Y1HY98_KLENI)	FALSE
Solyc03g078710.3.1	1.20968	1.18761e-05	0.000162531	Glycosyltransferase (AHRD V3.3 *-* A0A328E199_9ASTE)	FALSE
Solyc02g090210.3.1	1.20854	0.000553388	0.00425902	GDSL esterase/lipase (AHRD V3.3 *** A0A2G3D8U2_CAPCH)	FALSE
Solyc11g006505.1.1	1.20762	0.000312619	0.00264359	Nuclear transport factor 2 (NTF2) family protein (AHRD V3.3 *** AT5G04830.2)	FALSE
Solyc01g096790.4.1	1.20714	4.5864e-05	0.000520967	B3 domain-containing protein (AHRD V3.3 *-* A0A1Q3CKL9_CEPFO)	FALSE
Solyc03g093410.3.1	1.20706	9.27343e-11	4.55636e-09	Sugar transporter protein 16	FALSE
Solyc01g008550.4.1	1.20683	5.62256e-10	2.34515e-08	phenylacetaldehyde reductase 2	FALSE
Solyc03g005570.3.1	1.20274	4.61169e-05	0.000523557	Myb-related transcription factor LBM2 (AHRD V3.3 *** Q9SLT1_TOBAC)	TRUE
Solyc11g008460.1.1	1.20096	8.9231e-06	0.000127612	SART-1 family protein DOT2 (AHRD V3.3 *-* A0A1U8F4I8_CAPAN)	TRUE
Solyc02g071410.3.1	1.19704	9.78458e-09	3.06847e-07	2-oxoglutarate (2OG) and Fe(II)-dependent oxygenase superfamily protein (AHRD V3.3 *** Q9SB33_ARATH)	FALSE
Solyc09g091960.3.1	1.19403	1.89014e-12	1.33519e-10	High mobility group B protein 15 (AHRD V3.3 *** A0A1U8FAJ0_CAPAN)	TRUE
Solyc01g079880.3.1	1.19291	1.26604e-17	2.41469e-15	Aluminum induced protein with YGL and LRDR motifs (AHRD V3.3 *** Q94BR2_ARATH)	FALSE
Solyc01g091340.3.1	1.18954	0.000784697	0.00568865	Peptidylprolyl isomerase (AHRD V3.3 *** A0A2G3AH66_CAPAN)	TRUE
Solyc06g051460.4.1	1.18936	0.00554122	0.0278989	Double Clp-N motif-containing P-loop nucleoside triphosphate hydrolases superfamily protein (AHRD V3.3 *** A0A2U1M3E7_ARTAN)	TRUE
Solyc09g011710.4.1	1.18863	2.13385e-08	6.11586e-07	Class I heat shock protein (AHRD V3.3 *** A0A2K3JRP0_TRIPR)	TRUE
Solyc07g007620.3.1	1.18586	3.134e-05	0.000376583	Monogalactosyldiacylglycerol synthase 3, chloroplastic (AHRD V3.3 *** A0A2G3BXT4_CAPCH)	FALSE
Solyc01g095800.3.1	1.1815	2.3148e-05	0.000289247	F-box protein (AHRD V3.3 *** A0A2G2XT66_CAPBA)	TRUE
Solyc02g082960.3.1	1.18117	4.30206e-07	8.67858e-06	Chitinase (AHRD V3.3 *** Q9FS45_VITVI)	FALSE
Solyc01g108540.3.1	1.18087	7.4599e-15	8.82617e-13	Alpha/beta-Hydrolases superfamily protein (AHRD V3.3 *** A0A2U1KC75_ARTAN)	FALSE
Solyc05g046010.4.1	1.17867	9.81295e-08	2.29772e-06	Peroxidase (AHRD V3.3 *** K4C0T4_SOLLC)	FALSE
Solyc09g011520.3.1	1.17499	0.00939827	0.0422206	Glutathione S-transferase-like protein (AHRD V3.3 *** A8DUB0_SOLLC)	FALSE
Solyc03g120430.3.1	1.17316	2.56405e-10	1.15685e-08	D-glycerate 3-kinase (AHRD V3.3 *** A0A2K3PBX9_TRIPR)	TRUE
Solyc01g098070.1.1	1.17006	0.00301511	0.0173402	Agamous-like MADS-box protein AGL21 (AHRD V3.3 *** A0A2G2W7Q0_CAPBA)	TRUE
Solyc01g110903.1.1	1.16917	0.00645184	0.0315156	Auxin-responsive protein SAUR20 (AHRD V3.3 *** A0A2G2XY34_CAPAN)	FALSE
Solyc08g005300.3.1	1.16755	0.00365413	0.020133	DnaJ domain (AHRD V3.3 *-* A0A200PXA9_9MAGN)	TRUE
Solyc07g009443.1.1	1.16505	0.00122615	0.00827156	G-type lectin S-receptor-like serine/threonine-protein kinase (AHRD V3.3 *** A0A2G2Z069_CAPAN)	FALSE
Solyc02g082170.3.1	1.16092	6.5424e-07	1.25926e-05	Purine permease (AHRD V3.3 *** A0A2P5EE53_TREOI),Pfam:PF16913	FALSE
Solyc03g006630.3.1	1.15918	0.00018081	0.0016594	Sphingosine kinase 1 (AHRD V3.3 *** A0A2G2WVZ4_CAPBA)	FALSE
Solyc01g006360.4.1	1.1575	0.010622	0.0465045	Callose synthase 9 (AHRD V3.3 *** A0A2G3AHT3_CAPAN)	FALSE
Solyc04g008500.4.1	1.15323	1.05043e-06	1.89167e-05	Protein indeterminate-domain 6, chloroplastic (AHRD V3.3 *** A0A2G3CF47_CAPCH)	TRUE
Solyc08g078310.3.1	1.15148	0.00118965	0.00805903	Chromogranin (DUF1639) (AHRD V3.3 *-* O23587_ARATH)	TRUE
Solyc02g086970.4.1	1.15122	1.92174e-12	1.35296e-10	Aldehyde dehydrogenase (AHRD V3.3 *** A0A2U1MUY7_ARTAN)	FALSE
Solyc03g078490.4.1	1.14538	2.36379e-05	0.000294142	Glycosyltransferase (AHRD V3.3 *** A0A2I4HTK4_9ROSI)	TRUE
Solyc01g044556.1.1	1.14468	0.00187143	0.0117588	TPX2 (targeting protein for Xklp2) protein family (AHRD V3.3 --* AT4G32330.4)	FALSE
Solyc08g022133.1.1	1.14466	0.00220294	0.0134451	Unknown protein	FALSE
Solyc08g082840.3.1	1.14392	0.000252461	0.00219959	N-acetylglucosaminyl-phosphatidylinositol biosynthetic protein (AHRD V3.3 *** A0A2G3DAF0_CAPCH)	TRUE
Solyc12g088940.3.1	1.14329	2.15358e-05	0.000271364	MAP kinase kinase kinase 87	TRUE
Solyc10g076510.2.1	1.14221	0.00348226	0.0193736	Pyruvate decarboxylase (AHRD V3.3 *** Q8H9C6_SOLTU)	TRUE
Solyc02g092720.1.1	1.13694	7.52809e-05	0.000796868	hypothetical protein (AHRD V3.3 *** AT5G67350.1)	TRUE
Solyc09g082670.3.1	1.1317	1.0427e-05	0.000145877	Heat shock transcription factor (AHRD V3.3 *-* A0A1Y1I763_KLENI)	TRUE
Solyc01g103310.4.1	1.12772	5.92287e-07	1.15271e-05	Zinc finger CCCH domain-containing protein (AHRD V3.3 *-* A0A2K3NPU7_TRIPR)	FALSE
Solyc02g087280.3.1	1.12522	9.88938e-07	1.80104e-05	Protein NRT1/ PTR FAMILY 5.9 (AHRD V3.3 *** A0A2G3D9C8_CAPCH)	TRUE
Solyc07g065180.3.1	1.1205	1.92958e-06	3.27e-05	Cytokinin riboside 5'-monophosphate phosphoribohydrolase LOG (AHRD V3.3 *** A0A200RBG5_9MAGN)	FALSE
Solyc03g123580.4.1	1.11742	1.96352e-16	3.1208e-14	LL-diaminopimelate aminotransferase (AHRD V3.3 *-* AT3G14280.1)	FALSE
Solyc06g059860.3.1	1.11535	6.02298e-07	1.17002e-05	patatin-like phospholipase domain protein (AHRD V3.3 *** AT1G76980.1)	TRUE
Solyc01g065840.4.1	1.11465	4.64448e-05	0.00052614	F-box/RNI-like superfamily protein (AHRD V3.3 *** A0A178U7Y7_ARATH)	TRUE
Solyc11g069940.1.1	1.10978	3.37815e-10	1.48582e-08	Glutaredoxin (AHRD V3.3 *** A0A118JSL8_CYNCS)	FALSE
Solyc02g092820.4.1	1.10829	0.00302915	0.0174066	IAA-amido synthetase 3-4	FALSE
Solyc03g097740.1.1	1.10471	0.00126435	0.00847752	ARM repeat superfamily protein (AHRD V3.3 *** Q9FI58_ARATH)	TRUE
Solyc03g113770.3.1	1.10053	0.000172745	0.00160079	NAD(P)H-hydrate epimerase (AHRD V3.3 *** A0A1U8G4A3_CAPAN)	FALSE
Solyc04g081050.2.1	1.09731	0.00160401	0.0103164	Calcium-binding tetratricopeptide family protein (AHRD V3.3 *** A0A2U1KJ59_ARTAN)	TRUE
Solyc06g071060.1.1	1.09686	8.59918e-09	2.7335e-07	NAD(P)-binding Rossmann-fold superfamily protein (AHRD V3.3 *** A0A2U1Q367_ARTAN),Pfam:PF13561	FALSE
Solyc04g009860.4.1	1.09495	8.69259e-07	1.60537e-05	2-oxoglutarate (2OG) and Fe(II)-dependent oxygenase superfamily protein (AHRD V3.3 *** A0A2U1QA13_ARTAN)	FALSE
Solyc08g042040.4.1	1.09384	1.21074e-05	0.00016505	Kinesin-like protein (AHRD V3.3 *-* A0A328E6H2_9ASTE)	TRUE
Solyc05g005700.4.1	1.09376	2.32851e-05	0.000290614	Aldehyde dehydrogenase (AHRD V3.3 *** Q43274_MAIZE)	FALSE
Solyc06g073690.2.1	1.09096	0.000347995	0.0028926	Transducin/WD40 repeat-like superfamily protein (AHRD V3.3 *-* A0A2U1PDP2_ARTAN)	FALSE
Solyc08g007060.4.1	1.09067	1.07466e-09	4.18299e-08	Protein NRT1/ PTR FAMILY 7.3 (AHRD V3.3 *** A0A2G3BPK6_CAPCH)	TRUE
Solyc09g064940.2.1	1.08889	0.000176585	0.00162918	Phenazine biosynthesis PhzF protein (AHRD V3.3 *** A0A200Q4V2_9MAGN)	FALSE
Solyc09g074850.4.1	1.08656	0.000625342	0.00470741	Glutathione S-transferase (AHRD V3.3 *** A0A2G3CTS1_CAPCH)	FALSE
Solyc01g100510.4.1	1.08619	0.00795878	0.0370315	knotted 4	TRUE
Solyc06g016750.3.1	1.08617	4.78992e-05	0.000539413	Nuclear factor Y, subunit C10 (AHRD V3.3 *-* A0A1P8AN83_ARATH)	TRUE
Solyc04g077000.3.1	1.08335	9.37074e-06	0.000132926	RBR-type E3 ubiquitin transferase (AHRD V3.3 *** A0A2G3CPC1_CAPCH)	TRUE
Solyc01g005520.4.1	1.08316	0.0101489	0.0448924	Protein LOW PSII ACCUMULATION 1, chloroplastic (AHRD V3.3 *-* A0A1J3E7D8_NOCCA)	TRUE
Solyc01g109390.3.1	1.08149	0.00237062	0.0142632	Bifunctional inhibitor/lipid-transfer protein/seed storage 2S albumin superfamily protein (AHRD V3.3 *** Q8GXG3_ARATH)	FALSE
Solyc06g066520.1.1	1.08084	0.0046985	0.0245761	Avr9/Cf-9 rapidly elicited protein 146 (AHRD V3.3 *** Q9FQZ6_TOBAC)	TRUE
Solyc06g005310.3.1	1.07965	3.29124e-09	1.13756e-07	Transcription factor MYB48 (AHRD V3.3 *** A0A2G2Z7N5_CAPAN)	TRUE
Solyc02g083470.3.1	1.07748	6.28998e-06	9.50063e-05	pre-rRNA-processing protein esf1 (AHRD V3.3 *** A0A2I4FDA5_9ROSI)	TRUE
Solyc05g052420.3.1	1.07655	5.44646e-05	0.00060619	Abscisic acid receptor PYL6 (AHRD V3.3 *-* A0A1U8GQ86_CAPAN)	FALSE
Solyc02g069730.3.1	1.07463	0.000765793	0.00557472	CASP-like protein (AHRD V3.3 *** A0A2G3D4D7_CAPCH)	FALSE
Solyc04g050930.3.1	1.07398	0.0079671	0.0370587	violaxanthin de-epoxidase	FALSE
Solyc03g115140.4.1	1.07304	5.74463e-08	1.44338e-06	DNAJ protein JJJ1 homolog (AHRD V3.3 *** A0A2I4EZM7_9ROSI)	TRUE
Solyc05g052950.4.1	1.07157	1.95901e-08	5.66116e-07	Regulator of chromosome condensation (RCC1) family protein (AHRD V3.3 *** Q9M2S1_ARATH)	TRUE
Solyc09g074310.3.1	1.07148	0.00115874	0.00788273	Aldo-keto reductase (AHRD V3.3 *** A0A2U1PVJ5_ARTAN)	FALSE
Solyc02g030130.4.1	1.06731	0.0046794	0.0245312	Subtilisin-like protease (AHRD V3.3 *** A0A1J3H877_NOCCA)	TRUE
Solyc11g069260.2.1	1.06472	3.30415e-05	0.000394318	ABC transporter ATP-binding protein (AHRD V3.3 *** A0A1E7VIK9_9BURK)	FALSE
Solyc06g072880.2.1	1.05815	0.00320744	0.0181772	Glycosyltransferase (AHRD V3.3 *** A0A2G3CA94_CAPCH)	FALSE
Solyc07g054600.3.1	1.05483	0.00537682	0.0272529	F-box protein (AHRD V3.3 *-* A0A1J3J8H1_NOCCA)	FALSE
Solyc09g090350.3.1	1.05394	4.06614e-09	1.38038e-07	Long-chain-alcohol oxidase (AHRD V3.3 *** A0A1U8G4D7_CAPAN)	TRUE
Solyc07g007870.3.1	1.05391	6.79042e-13	5.21843e-11	12-oxophytodienoate reductase 3	FALSE
Solyc08g078900.1.1	1.05162	8.50726e-07	1.57531e-05	Bifunctional inhibitor/lipid-transfer protein/seed storage 2S albumin superfamily protein (AHRD V3.3 *** A0A2U1PU47_ARTAN)	TRUE
Solyc02g078550.3.1	1.04965	3.19473e-08	8.67735e-07	RNA polymerase II C-terminal domain phosphatase-like 1 (AHRD V3.3 *** A0A2G3D6D3_CAPCH)	TRUE
Solyc06g071180.3.1	1.04799	0.00589048	0.0293552	Dynein light chain (AHRD V3.3 *** Q4W5W8_VICFA)	TRUE
Solyc09g074060.3.1	1.04797	0.00445439	0.0236053	BSD domain-containing protein (AHRD V3.3 *-* A0A1Q3CF56_CEPFO)	TRUE
Solyc03g043750.3.1	1.0478	0.00040995	0.00334659	Alternative NAD(P)H-ubiquinone oxidoreductase C1, chloroplastic/mitochondrial (AHRD V3.3 *** A0A2G2VCR1_CAPBA)	TRUE
Solyc01g107560.3.1	1.04674	1.73154e-09	6.45254e-08	Glycosyltransferase (AHRD V3.3 *** A0A2G2W4I0_CAPBA)	FALSE
Solyc03g113430.3.1	1.04295	0.00232365	0.0140491	Protein NRT1/ PTR FAMILY 2.9 (AHRD V3.3 *** A0A2G2WRK6_CAPBA)	FALSE
Solyc04g071900.4.1	1.04121	0.00283327	0.0164705	Peroxidase (AHRD V3.3 *** K4BTH7_SOLLC)	FALSE
Solyc03g114640.4.1	1.04067	0.00730965	0.0346568	Signal peptide peptidase (AHRD V3.3 *** A0A2U1MQA9_ARTAN)	TRUE
Solyc09g090890.3.1	1.04036	3.10944e-05	0.00037406	DNA mismatch repair protein MSH1, mitochondrial (AHRD V3.3 *-* A0A2G2ZUJ8_CAPAN)	FALSE
Solyc03g093390.4.1	1.03963	0.00033387	0.00279178	beta expansin precursor 2	FALSE
Solyc06g083410.4.1	1.03804	4.29313e-06	6.77217e-05	protein XRI1 (AHRD V3.3 *** A0A2I4G9Z5_9ROSI)	TRUE
Solyc02g063450.4.1	1.03755	2.47997e-07	5.29835e-06	Glycine-rich domain-containing protein 2 (AHRD V3.3 *** A0A2G3A574_CAPAN)	TRUE
Solyc08g150101.1.1	1.03707	5.06039e-06	7.81214e-05	Unknown protein	FALSE
Solyc06g068520.3.1	1.03698	8.39438e-07	1.55715e-05	Hydroxyproline-rich systemin (AHRD V3.3 *** HSY1_SOLLC)	TRUE
Solyc02g089080.2.1	1.03395	0.000178702	0.00164392	Protein RALF-like 27 (AHRD V3.3 --* A0A2G3D352_CAPCH)	FALSE
Solyc12g036500.2.1	1.03297	0.00127312	0.00852536	DUF1666 domain-containing protein (AHRD V3.3 *** A0A1Q3CZB6_CEPFO)	TRUE
Solyc07g008130.3.1	1.03295	7.98857e-11	3.97157e-09	Cupredoxin (AHRD V3.3 *-* A0A2U1MB64_ARTAN)	TRUE
Solyc06g073560.4.1	1.03276	6.27939e-15	7.58281e-13	Isovaleryl-CoA dehydrogenase (AHRD V3.3 *** B4FQ64_MAIZE)	FALSE
Solyc04g077180.3.1	1.03174	1.95233e-09	7.17334e-08	Alpha/beta-Hydrolases superfamily protein (AHRD V3.3 *** Q08A69_ARATH)	TRUE
Solyc12g056160.2.1	1.0305	0.00486016	0.0252017	Cation/H(+) antiporter 17 (AHRD V3.3 *** A0A2G2Y8P8_CAPAN)	FALSE
Solyc05g051530.4.1	1.02987	0.00110802	0.0076018	ABC transporter G family member 11 (AHRD V3.3 *** A0A2G2ZJ77_CAPAN)	TRUE
Solyc12g094620.3.1	1.02946	0.000436172	0.00350404	catalase	TRUE
Solyc09g092010.1.1	1.02671	0.00416327	0.0224135	Receptor like protein kinase S.2 (AHRD V3.3 *-* A0A2G3AS19_CAPCH)	TRUE
Solyc02g081690.1.1	1.02579	0.00234308	0.014142	Glycosyltransferase (AHRD V3.3 *** A0A2I4E012_9ROSI)	FALSE
Solyc11g012660.2.1	1.02563	5.15569e-08	1.31429e-06	Microtubule-associated protein 70 (AHRD V3.3 *** A0A200RBU6_9MAGN)	TRUE
Solyc04g007070.3.1	1.02236	3.81917e-12	2.53688e-10	Disease resistance protein (AHRD V3.3 *** A0A2U1N8H9_ARTAN)	FALSE
Solyc05g050210.4.1	1.02214	0.000439131	0.00352448	GDSL esterase/lipase (AHRD V3.3 *** A0A2G2ZIE8_CAPAN)	FALSE
Solyc07g055870.4.1	1.02105	9.88463e-13	7.40641e-11	MAP kinase kinase kinase 58	TRUE
Solyc09g150126.1.1	1.01966	0.000444021	0.00355149	Unknown protein	TRUE
Solyc09g042780.2.1	1.01959	7.57295e-05	0.000800809	Unknown protein	FALSE
Solyc07g065340.1.1	1.01907	0.000588456	0.00448444	Serine acetyltransferase (AHRD V3.3 *** A0A2K3M2Y7_TRIPR)	TRUE
Solyc07g053800.3.1	1.01497	7.92476e-06	0.000115299	RING 1B (AHRD V3.3 *** F4I2H5_ARATH)	TRUE
Solyc09g074380.4.1	1.01251	0.00203146	0.0125649	DCD (Development and Cell Death) domain protein (AHRD V3.3 *-* F4IUS3_ARATH)	TRUE
Solyc02g068780.4.1	1.0124	0.00554501	0.0279113	Unknown protein	TRUE
Solyc06g065445.1.1	1.01142	1.28765e-08	3.89151e-07	Protein SENSITIVE TO PROTON RHIZOTOXICITY 1 (AHRD V3.3 *-* A0A2G3C818_CAPCH)	FALSE
Solyc03g044200.3.1	1.01107	0.00785905	0.0367141	Alcohol dehydrogenase-like protein (AHRD V3.3 *** A0A291L9M0_MENPI)	FALSE
Solyc01g096140.3.1	1.01073	6.463e-05	0.000703178	Aluminum-activated malate transporter 10 (AHRD V3.3 *** A0A2G2YY99_CAPAN)	TRUE
Solyc05g049990.4.1	1.00972	4.43743e-09	1.49915e-07	Heavy metal-associated isoprenylated plant protein (AHRD V3.3 *-* A0A2R6R9M9_ACTCH)	TRUE
Solyc05g026310.4.1	1.00857	6.42815e-28	8.99084e-25	Derlin (AHRD V3.3 *** A0A2G3CG93_CAPCH)	FALSE
Solyc10g011660.3.1	1.00454	2.3456e-09	8.41207e-08	Auxin-responsive GH3 family protein (AHRD V3.3 *** A0A2U1NZC8_ARTAN)	FALSE
Solyc10g050220.2.1	1.00291	3.89372e-07	7.94653e-06	hypothetical protein (AHRD V3.3 *-* AT4G33980.2)	TRUE
Solyc01g091160.4.1	1.00289	0.00652034	0.0317762	arginase 1	TRUE
Solyc07g066080.3.1	1.00107	3.45731e-10	1.51113e-08	Ubiquitin-conjugating enzyme (AHRD V3.3 *** A0A200QCU7_9MAGN)	TRUE
Solyc01g097990.3.1	1.00056	0.00298011	0.0171955	N-acetyltransferase (AHRD V3.3 *-* A0A1W6AHU6_BACMY)	FALSE

## Sheet: DOWN
Supplemental Table S7. Down-regulated DEGs of E3H90m vs W3H90m in root (log2 fold change ≦ -1.0, p_value < 0.05, p_adj < 0.05).
Geneid	log2FoldChange	p_value	p_adj	Annotation
Solyc05g010270.1.1	-5.61369	2.86247e-07	6.02354e-06	hypothetical protein (AHRD V3.3 --* AT5G38790.1)
Solyc02g070990.1.1	-5.46474	2.4048e-08	6.81769e-07	Chlorophyll a-b binding protein, chloroplastic (AHRD V3.3 *** A0A2G3A7J8_CAPAN)
Solyc04g050010.2.1	-5.26202	4.13782e-05	0.000476986	LOB domain-containing protein (AHRD V3.3 *** A0A2K3PP50_TRIPR)
Solyc06g072350.3.1	-5.222	1.34556e-22	7.62969e-20	CASP-like protein (AHRD V3.3 *** A0A2G3CXI9_CAPCH)
Solyc06g069730.3.1	-5.07317	3.64091e-07	7.46689e-06	Chlorophyll a-b binding protein, chloroplastic (AHRD V3.3 *** A0A1U8GPF4_CAPAN)
Solyc11g005290.1.1	-4.89855	0.000199235	0.00180716	RING/U-box superfamily protein (AHRD V3.3 *** A0A2U1KVX7_ARTAN)
Solyc03g082770.1.1	-4.813	3.55724e-07	7.32394e-06	Extensin-like protein Dif10 (AHRD V3.3 *-* Q43504_SOLLC)
Solyc01g017600.3.1	-4.76687	0.000215126	0.00193043	transmembrane protein 45B-like (AHRD V3.3 *** A0A2I4DQK0_9ROSI)
Solyc09g082760.3.1	-4.74167	7.26929e-06	0.000107024	Aspartic proteinase A1 (AHRD V3.3 *** A0A2G3CJM2_CAPCH)
Solyc11g069970.1.1	-4.67479	1.44244e-06	2.51977e-05	Late embryogenesis abundant (LEA) hydroxyproline-rich glycoprotein family (AHRD V3.3 *** A0A2U1MMJ0_ARTAN)
Solyc02g080840.1.1	-4.61589	0.00115762	0.00787769	F-box plant-like protein, putative (AHRD V3.3 *** A0A072V4I2_MEDTR)
Solyc03g118900.3.1	-4.5873	1.34431e-07	3.04905e-06	WAT1-related protein (AHRD V3.3 *** K4BM39_SOLLC)
Solyc06g082960.3.1	-4.49005	5.83905e-06	8.88993e-05	Maternal effect embryo arrest protein (AHRD V3.3 *** Q94K16_ARATH)
Solyc02g070980.1.1	-4.43874	9.26668e-07	1.69795e-05	Chlorophyll a-b binding protein, chloroplastic (AHRD V3.3 *-* A0A2G3A7J8_CAPAN)
Solyc07g043717.1.1	-4.40292	4.80964e-09	1.61709e-07	3-hydroxyisobutyryl-CoA hydrolase-like protein 5 (AHRD V3.3 *** A0A2G3CEN5_CAPCH)
Solyc11g073150.1.1	-4.32713	3.91984e-11	2.12502e-09	Late embryogenesis abundant protein-related / LEA protein-like protein (AHRD V3.3 *** A0A178VGJ3_ARATH)
Solyc10g150139.1.1	-4.31372	0.00476848	0.0248404	HMG-Y-related protein A-like (AHRD V3.3 *-* XP_010312916.1)
Solyc01g079910.1.1	-4.10368	0.000615122	0.00464218	Xyloglucan specific endoglucanase inhibitor (AHRD V3.3 *-* F6MHJ7_SOLTU)
Solyc07g063690.1.1	-4.08506	0.00340337	0.0190304	Calcium-binding protein PBP1 (AHRD V3.3 *** A0A2G2Z578_CAPAN)
Solyc11g073030.1.1	-4.0733	1.23701e-13	1.11384e-11	Dirigent protein (AHRD V3.3 *** K4DB09_SOLLC)
Solyc09g066160.1.1	-3.9652	0.00522675	0.0266806	Unknown protein
Solyc02g072540.3.1	-3.96061	2.09405e-06	3.53729e-05	Non-specific serine/threonine protein kinase (AHRD V3.3 *** A0A2G2XE54_CAPBA)
Solyc10g050510.1.1	-3.93606	0.0112109	0.0484657	Unknown protein
Solyc01g079470.4.1	-3.92981	0.000294092	0.00250713	Unknown protein
Solyc11g012520.1.1	-3.89368	0.000577609	0.00441627	hypothetical protein (AHRD V3.3 --* AT4G16447.1)
Solyc04g050623.1.1	-3.88573	2.38444e-09	8.52393e-08	Unknown protein
Solyc01g095840.2.1	-3.88299	1.0829e-08	3.34599e-07	RING/U-box superfamily protein (AHRD V3.3 *** A0A2U1MJ85_ARTAN)
Solyc06g073220.1.1	-3.87928	2.71771e-13	2.25366e-11	Stigma-specific Stig1 family protein (AHRD V3.3 *** A0A2U1KMG6_ARTAN)
Solyc03g034100.4.1	-3.86398	0.000282335	0.00241771	ovate family protein 6
Solyc12g042520.3.1	-3.83371	0.00755446	0.0355444	Gibberellin-regulated family protein (AHRD V3.3 *** A0A2U1P8W2_ARTAN)
Solyc01g005760.3.1	-3.83245	3.61048e-05	0.000425226	NL0D (AHRD V3.3 *** Q9ZS82_SOLLC)
Solyc07g049135.1.1	-3.82419	0.00413364	0.0222883	Fruit-specific protein (AHRD V3.3 *** FSPM_SOLLC)
Solyc04g007480.1.1	-3.793	0.00120707	0.00816906	Unknown protein
Solyc11g042890.2.1	-3.77276	0.00451194	0.0238422	Late embryogenesis abundant protein (AHRD V3.3 *-* A0A200QZY3_9MAGN)
Solyc06g069880.1.1	-3.7546	0.00221747	0.0135122	protein PHYTOCHROME KINASE SUBSTRATE 3-like (AHRD V3.3 *** A0A2I4FQS5_9ROSI)
Solyc02g070950.1.1	-3.74257	6.90423e-08	1.70613e-06	Chlorophyll a-b binding protein, chloroplastic (AHRD V3.3 *** A0A2G3A7J8_CAPAN)
Solyc04g063240.3.1	-3.74051	1.12627e-05	0.000155251	Protein STAY-GREEN, chloroplastic (AHRD V3.3 *** A0A2G2WYV6_CAPBA)
Solyc12g049140.1.1	-3.73884	4.74264e-07	9.44925e-06	Extensin-like protein Ext1 (AHRD V3.3 *** Q8VWM5_SOLLC)
Solyc07g014690.3.1	-3.67784	0.00098963	0.00689935	Na+ transporter (AHRD V3.3 *** S0CPS1_SOLLC)
Solyc11g012210.1.1	-3.67306	0.000223074	0.00198393	MBOAT (Membrane bound O-acyl transferase) family protein (AHRD V3.3 *** A0A2U1LYZ9_ARTAN)
Solyc02g089860.1.1	-3.66276	0.00311119	0.0177661	Elongation of fatty acids protein 3-like (AHRD V3.3 *** A0A2G3D8W4_CAPCH)
Solyc05g056477.1.1	-3.65469	0.00340593	0.0190304	NAC domain-containing protein (AHRD V3.3 *** A0A2K3LLY1_TRIPR)
Solyc05g009580.3.1	-3.64328	2.12749e-13	1.81442e-11	Aluminum-activated malate transporter 9 (AHRD V3.3 *** A0A2G3B6A6_CAPCH)
Solyc01g006910.4.1	-3.64321	0.000416965	0.00338936	RING/U-box superfamily protein (AHRD V3.3 *** A0A2U1MY73_ARTAN)
Solyc04g008670.2.1	-3.64006	0.00685639	0.0329698	Gibberellin 2-beta-dioxygenase 8 (AHRD V3.3 *** A0A2G2X9B0_CAPBA)
Solyc08g081850.1.1	-3.58845	9.12231e-05	0.000935416	Transmembrane protein, putative (DUF1191) (AHRD V3.3 *** Q5S4T6_ARATH)
Solyc03g091020.1.1	-3.57519	0.000331764	0.00277983	Bifunctional inhibitor/lipid-transfer protein/seed storage 2S albumin superfamily protein (AHRD V3.3 *** A0A2U1PU47_ARTAN)
Solyc12g094640.3.1	-3.57248	4.5873e-06	7.15019e-05	Glyceraldehyde-3-phosphate dehydrogenase (AHRD V3.3 *** A0A2G2YA75_CAPAN)
Solyc04g050970.3.1	-3.56611	0.00965841	0.043141	Protein kinase (AHRD V3.3 *** E5GBV1_CUCME)
Solyc12g099790.3.1	-3.55894	0.00340606	0.0190304	Calcium-dependent protein kinase (AHRD V3.3 *** B2KTB3_WHEAT)
Solyc07g064990.3.1	-3.49732	1.63672e-09	6.13186e-08	S-adenosyl-L-methionine-dependent methyltransferases superfamily protein (AHRD V3.3 *** F4JW89_ARATH)
Solyc01g087750.4.1	-3.49544	0.000564437	0.00432818	protein RETICULATA-RELATED 4, chloroplastic-like (AHRD V3.3 *** A0A2I4G748_9ROSI)
Solyc06g053140.3.1	-3.48332	0.00111282	0.00762723	Rhodanese-like domain-containing protein 14, chloroplastic (AHRD V3.3 *** A0A2G2WIJ1_CAPBA)
Solyc11g007210.3.1	-3.47189	6.01197e-22	2.92263e-19	Peroxidase (AHRD V3.3 *** K4D4Y2_SOLLC)
Solyc11g007220.2.1	-3.45484	5.95461e-18	1.20123e-15	Peroxidase (AHRD V3.3 *** K4D4Y3_SOLLC)
Solyc05g054660.2.1	-3.44628	0.00301377	0.0173372	Zinc finger protein (AHRD V3.3 *** A0A200PZ96_9MAGN)
Solyc12g006100.2.1	-3.44101	0.00124646	0.0083709	Serine/threonine-protein phosphatase (AHRD V3.3 *-* A0A328DP52_9ASTE)
Solyc02g083930.1.1	-3.4401	0.00148928	0.00968681	BnaCnng52580D protein (AHRD V3.3 *-* A0A078JGY5_BRANA)
Solyc02g083100.2.1	-3.40275	0.00995265	0.0442668	DUF241 domain-containing protein (AHRD V3.3 *-* A0A1Q3CEB1_CEPFO)
Solyc05g013020.1.1	-3.39227	0.00269041	0.0157843	Galactosyl transferase GMA12/MNN10 family protein (AHRD V3.3 *** A0A2U1L978_ARTAN)
Solyc12g013710.2.1	-3.36707	0.00193522	0.0120764	light dependent NADH:protochlorophyllide oxidoreductase 1
Solyc11g007430.3.1	-3.36208	0.00239281	0.0143589	Receptor-like protein kinase (AHRD V3.3 *** A0A2K3L8M9_TRIPR)
Solyc01g097770.4.1	-3.34268	0.000266105	0.00229182	phototropin 2
Solyc12g006000.1.1	-3.30248	3.2919e-14	3.4532e-12	Clathrin coat assembly protein (AHRD V3.3 *** A0A1U8E4Q4_CAPAN)
Solyc08g007430.2.1	-3.2951	0.00135708	0.00898977	NIT2
Solyc10g074826.1.1	-3.29019	2.10109e-25	1.91656e-22	Unknown protein
Solyc03g031470.3.1	-3.27763	0.0088393	0.0402013	Dihydroflavonol 4-reductase (AHRD V3.3 *** Q403G5_LOTJA)
Solyc09g011970.3.1	-3.27621	0.00736437	0.0348611	Laccase (AHRD V3.3 *** K4CRM2_SOLLC)
Solyc06g074350.3.1	-3.27523	0.00062601	0.00470741	self-pruning
Solyc04g011810.1.1	-3.26429	5.07491e-12	3.29852e-10	Glutaredoxin (AHRD V3.3 *** A0A1L7MRR3_SOLPI)
Solyc08g014190.4.1	-3.25544	0.00200895	0.012452	Geraniol 8-hydroxylase (AHRD V3.3 *** A0A1U8G9M4_CAPAN)
Solyc03g118930.2.1	-3.24791	1.85583e-18	4.32614e-16	Glycosyltransferase (AHRD V3.3 *** Q9LV22_ARATH)
Solyc02g094370.1.1	-3.21049	0.00241169	0.0144357	Exocyst subunit Exo70 family protein (AHRD V3.3 *** A0A2G3DA33_CAPCH)
Solyc07g017230.3.1	-3.20737	0.0111699	0.0483283	pollen receptor-like protein kinase 2
Solyc03g032243.1.1	-3.19676	2.94836e-15	3.84202e-13	IQ domain-containing protein (AHRD V3.3 *-* A0A1Q3B9N0_CEPFO)
Solyc07g008010.4.1	-3.17081	0.000110263	0.0011015	R2R3MYB transcription factor 82
Solyc12g088500.2.1	-3.15587	0.00429786	0.022957	cyclin A3_5
Solyc06g073010.3.1	-3.15327	0.000955241	0.00670851	PGPS/D3 (AHRD V3.3 *-* Q9ZTN4_PETHY)
Solyc06g076910.3.1	-3.14812	0.000591372	0.00449626	Receptor-like protein kinase (AHRD V3.3 *** A0A2R6P698_ACTCH)
Solyc01g107220.2.1	-3.1167	1.36875e-17	2.58707e-15	extensin-2-like (AHRD V3.3 *-* XP_004231387.1)
Solyc09g091340.1.1	-3.10943	2.17954e-06	3.66401e-05	Plant self-incompatibility S1 (AHRD V3.3 *** A0A118JZS1_CYNCS)
Solyc06g082260.4.1	-3.10229	7.92762e-28	1.03951e-24	Laccase (AHRD V3.3 *-* A0A1U8H2F1_CAPAN)
Solyc02g077330.3.1	-3.08937	0.000228935	0.00202234	GDSL esterase/lipase (AHRD V3.3 *** A0A2G3D5Q8_CAPCH)
Solyc06g064680.1.1	-3.07927	0.00170893	0.0108749	NBS-coding resistance gene analog (AHRD V3.3 *-* B3V819_TOBAC)
Solyc11g006250.2.1	-3.0792	0.0019343	0.0120742	GDSL-motif lipase/hydrolase family protein 2
Solyc03g005780.3.1	-3.05444	1.61941e-08	4.7651e-07	Chlorophyll a-b binding protein, chloroplastic (AHRD V3.3 *** A0A2G2W7Q4_CAPBA)
Solyc02g069450.3.1	-3.05352	2.72769e-05	0.000333297	Photosystem I reaction center subunit III, chloroplastic (AHRD V3.3 *** A0A1U8FJA0_CAPAN)
Solyc01g097710.1.1	-3.05013	7.09434e-08	1.74528e-06	Extensin-like protein Dif10 (AHRD V3.3 *-* Q43504_SOLLC)
Solyc01g097690.2.1	-3.03398	1.55931e-16	2.49727e-14	Extensin-like protein Dif10 (AHRD V3.3 *-* Q43504_SOLLC)
Solyc01g009400.3.1	-3.00387	1.85923e-13	1.60521e-11	Peroxidase (AHRD V3.3 *** K4ATD6_SOLLC)
Solyc01g097720.1.1	-2.99521	7.41445e-18	1.4675e-15	Extensin-like protein Dif10 (AHRD V3.3 *-* Q43504_SOLLC)
Solyc09g011960.2.1	-2.99297	3.4103e-06	5.51218e-05	Laccase (AHRD V3.3 *** K4CRM1_SOLLC)
Solyc06g062450.3.1	-2.98596	1.05935e-59	2.22251e-55	Leucine-rich repeat protein kinase family protein (AHRD V3.3 *-* A0A1P8B2S5_ARATH)
Solyc03g083770.1.1	-2.97982	9.54722e-07	1.7438e-05	Plant invertase/pectin methylesterase inhibitor superfamily protein, putative (AHRD V3.3 *** A0A061G4U8_THECC)
Solyc01g005860.2.1	-2.97662	3.80383e-13	3.02289e-11	Unknown protein
Solyc10g084190.1.1	-2.96052	4.85577e-19	1.30608e-16	Unknown protein
Solyc02g076680.3.1	-2.95152	0.0014714	0.00959888	DUF688 domain-containing protein (AHRD V3.3 *** A0A1Q3BIV2_CEPFO)
Solyc01g087960.3.1	-2.949	0.00843934	0.0387519	Carboxypeptidase (AHRD V3.3 *** A0A2G3C5U0_CAPCH)
Solyc03g097560.3.1	-2.94458	0.0106618	0.0466375	Bidirectional sugar transporter SWEET (AHRD V3.3 *** A0A142DVI0_SOLTU)
Solyc07g006710.2.1	-2.94262	4.91186e-14	4.77276e-12	Pathogenesis-related protein PR-1 (AHRD V3.3 *** A0A2G3BX31_CAPCH)
Solyc06g060900.1.1	-2.9403	1.60657e-15	2.18869e-13	Unknown protein
Solyc10g084200.2.1	-2.93986	7.86874e-14	7.36992e-12	Peroxidase (AHRD V3.3 *** K4D3K6_SOLLC)
Solyc12g007260.2.1	-2.93076	1.30044e-19	3.68691e-17	Xyloglucan endotransglucosylase/hydrolase (AHRD V3.3 *** A0A2G2YUJ1_CAPAN)
Solyc08g006860.3.1	-2.92461	1.35586e-05	0.000181647	Patatin (AHRD V3.3 *** PAT0_SOLTU)
Solyc02g014300.2.1	-2.92329	7.02285e-19	1.819e-16	Pectinesterase (AHRD V3.3 *** A0A2G2VTJ6_CAPBA)
Solyc12g019550.2.1	-2.9114	7.40548e-07	1.39593e-05	hypothetical protein (AHRD V3.3 *-* AT1G21500.1)
Solyc06g054500.1.1	-2.89183	0.000239418	0.00210167	Peroxidase (AHRD V3.3 *** K4C6D6_SOLLC)
Solyc01g106640.2.1	-2.88465	2.87014e-17	5.191e-15	Pathogenesis-related protein 1 (AHRD V3.3 *** E2GEU2_9ROSI)
Solyc12g098250.1.1	-2.87668	1.19726e-12	8.81348e-11	acanthoscurrin-1-like (AHRD V3.3 *-* XP_010314853.1)
Solyc07g049290.3.1	-2.8642	2.63494e-05	0.000323849	Protein NRT1/ PTR FAMILY 6.4 (AHRD V3.3 *** A0A2G2Z2Y2_CAPAN)
Solyc07g045430.4.1	-2.86325	7.89731e-12	4.87311e-10	Nudix hydrolase (AHRD V3.3 *** A0A2U1KQS6_ARTAN)
Solyc07g039190.4.1	-2.85766	0.0038955	0.0212059	hypothetical protein (AHRD V3.3 *-* AT5G56850.4)
Solyc04g081130.1.1	-2.85748	8.40605e-08	2.01093e-06	Glyoxal oxidase (AHRD V3.3 *** A0A200QQ43_9MAGN)
Solyc04g081120.1.1	-2.856	0.00938391	0.0421894	Glyoxal oxidase (AHRD V3.3 *** A0A200QQ43_9MAGN)
Solyc12g049160.1.1	-2.8482	4.21868e-06	6.66476e-05	Extensin-like protein Ext1 (AHRD V3.3 *** Q8VWM5_SOLLC)
Solyc06g034130.2.1	-2.84412	0.000398903	0.00326579	Late embryogenesis abundant protein-related / LEA protein-like protein (AHRD V3.3 *** A0A178VGJ3_ARATH)
Solyc12g098300.1.1	-2.81985	5.87765e-11	3.02981e-09	Unknown protein
Solyc01g005630.3.1	-2.8039	1.91991e-06	3.25625e-05	Ethylene-responsive transcription factor (AHRD V3.3 *** A0A2G3BR89_CAPCH)
Solyc03g091010.1.1	-2.80144	1.57534e-09	5.92305e-08	Bifunctional inhibitor/lipid-transfer protein/seed storage 2S albumin superfamily protein (AHRD V3.3 *** A0A2U1PU47_ARTAN)
Solyc12g044280.2.1	-2.79261	6.11571e-05	0.000668966	Photosystem I reaction center subunit VI, chloroplastic (AHRD V3.3 *** A0A2G3D0C1_CAPCH)
Solyc11g012200.3.1	-2.78058	0.0100969	0.044747	MBOAT (Membrane bound O-acyl transferase) family protein (AHRD V3.3 *** A0A2U1LYZ9_ARTAN)
Solyc05g006190.2.1	-2.77891	4.87235e-14	4.77276e-12	Unknown protein
Solyc07g008600.1.1	-2.77631	1.00397e-05	0.000140986	receptor-like protein 12 (AHRD V3.3 *** A0A1U8F5D2_CAPAN)
Solyc12g098260.1.1	-2.77205	1.04995e-11	6.25792e-10	acanthoscurrin-1-like (AHRD V3.3 *-* XP_010314853.1)
Solyc01g079180.4.1	-2.76694	9.94171e-06	0.000139797	Pectinesterase (AHRD V3.3 *** A0A2G2XQP7_CAPBA)
Solyc06g065870.3.1	-2.7532	1.47397e-06	2.56417e-05	envelope glycoprotein B (AHRD V3.3 *** AT1G80540.1)
Solyc12g098240.1.1	-2.75278	5.07828e-12	3.29852e-10	acanthoscurrin-1-like (AHRD V3.3 *-* XP_010314853.1)
Solyc05g008150.3.1	-2.75139	5.80064e-07	1.13312e-05	Fruit-specific protein (AHRD V3.3 *** A0A2G2VKF4_CAPBA)
Solyc04g082630.3.1	-2.72975	6.09557e-07	1.18193e-05	Glyceraldehyde-3-phosphate dehydrogenase (AHRD V3.3 *** A0A2G2X1C8_CAPBA)
Solyc06g008050.4.1	-2.72734	0.00213659	0.0131184	Flavin-containing monooxygenase (AHRD V3.3 *** D2IGV3_SOLLC)
Solyc03g090990.1.1	-2.72685	6.50615e-12	4.0868e-10	Bifunctional inhibitor/lipid-transfer protein/seed storage 2S albumin superfamily protein (AHRD V3.3 *** A0A2U1PU47_ARTAN)
Solyc02g080910.4.1	-2.72569	1.32343e-14	1.50899e-12	Pectate lyase (AHRD V3.3 *** A0A2G3A9B6_CAPAN)
Solyc04g081140.1.1	-2.72546	1.44547e-05	0.000192301	Glyoxal oxidase-related protein (AHRD V3.3 *** A0A2U1MRW9_ARTAN)
Solyc05g009570.3.1	-2.71836	6.25663e-09	2.06066e-07	30S ribosomal protein 3, chloroplastic (AHRD V3.3 *** A0A2G2VK36_CAPBA)
Solyc08g074683.1.1	-2.71164	3.74075e-13	2.98407e-11	Polyphenol oxidase (AHRD V3.3 *** Q41428_SOLTU)
Solyc12g089310.2.1	-2.70767	0.000301702	0.00256056	Tubulin beta chain (AHRD V3.3 *** A0A2G3CQF5_CAPCH)
Solyc08g081810.3.1	-2.70496	2.49419e-08	7.0239e-07	Cation/H(+) antiporter 17 (AHRD V3.3 *** A0A2G2XJX1_CAPBA)
Solyc08g081500.3.1	-2.69779	0.0012503	0.00839398	LETHM1
Solyc03g031530.4.1	-2.69279	2.27641e-18	5.02726e-16	Sulfite exporter TauE/SafE family protein 2 (AHRD V3.3 *** TAUE2_ARATH)
Solyc12g098290.1.1	-2.69249	7.72863e-10	3.1182e-08	acanthoscurrin-1-like (AHRD V3.3 *-* XP_010314853.1)
Solyc11g069735.1.1	-2.67928	1.53122e-24	1.10776e-21	High-affinity nitrate transporter 2.2 (AHRD V3.3 *** NRT22_ORYSJ)
Solyc05g018050.1.1	-2.66619	1.28738e-11	7.52346e-10	RING/U-box superfamily protein (AHRD V3.3 *-* A0A2U1KYA3_ARTAN)
Solyc09g090005.1.1	-2.66248	7.55612e-12	4.67632e-10	Germin-like protein subfamily 1 member 20 (AHRD V3.3 *** A0A2G3CSH1_CAPCH)
Solyc05g052265.1.1	-2.64894	7.63252e-08	1.86198e-06	Unknown protein
Solyc03g122330.1.1	-2.64611	9.44482e-08	2.22144e-06	Unknown protein
Solyc06g059880.3.1	-2.61234	3.1693e-16	4.81825e-14	Acetolactate synthase (AHRD V3.3 *** A0A2G3C6U7_CAPCH)
Solyc12g007250.1.1	-2.60597	2.2245e-16	3.48283e-14	Xyloglucan endotransglucosylase/hydrolase (AHRD V3.3 *** A0A2G2YUJ1_CAPAN)
Solyc12g100080.1.1	-2.60076	5.29034e-12	3.40464e-10	Extensin-like protein Ext1 (AHRD V3.3 *** Q8VWM5_SOLLC)
Solyc08g078650.3.1	-2.59289	0.00015972	0.00149643	Glyco_transf_8 domain-containing protein (AHRD V3.3 *** A0A1Q3D6P8_CEPFO)
Solyc04g081110.1.1	-2.59048	2.25368e-06	3.77955e-05	Glyoxal oxidase (AHRD V3.3 *** A0A200QQ43_9MAGN)
Solyc12g100100.1.1	-2.58552	2.24972e-11	1.2553e-09	Extensin-like protein Ext1 (AHRD V3.3 *** Q8VWM5_SOLLC)
Solyc06g068590.4.1	-2.58041	0.0114408	0.0491457	Serine/threonine-protein kinase fray2 (AHRD V3.3 *** A0A2G2ZC59_CAPAN)
Solyc12g049150.1.1	-2.57896	6.46535e-05	0.000703178	Extensin-like protein Ext1 (AHRD V3.3 *** Q8VWM5_SOLLC)
Solyc03g117250.4.1	-2.57764	0.00115363	0.00785563	Flotillin-like protein 2 (AHRD V3.3 *** A0A2G3CZJ6_CAPCH)
Solyc03g098010.3.1	-2.57462	0.00017481	0.00161564	phosphate starvation inducible gene TPSI1
Solyc01g107710.2.1	-2.56969	2.84683e-09	9.9049e-08	Late embryogenesis abundant protein-related / LEA protein-like protein (AHRD V3.3 *-* A0A178VGJ3_ARATH)
Solyc09g075410.4.1	-2.5417	7.53043e-15	8.82617e-13	Pollen Ole e 1 allergen/extensin (AHRD V3.3 *** A0A2U1KBI3_ARTAN)
Solyc12g014500.3.1	-2.536	2.11504e-05	0.000267794	S-adenosyl-L-methionine-dependent methyltransferases superfamily protein (AHRD V3.3 *** A0A2U1QHF5_ARTAN)
Solyc01g097700.1.1	-2.53023	0.000409767	0.0033464	Extensin-like protein Dif10 (AHRD V3.3 *-* Q43504_SOLLC)
Solyc12g089360.1.1	-2.5274	6.3675e-15	7.63372e-13	Peroxidase (AHRD V3.3 *** K4DH07_SOLLC)
Solyc01g005850.2.1	-2.51316	1.44065e-07	3.22571e-06	Extensin-like protein Dif54 (AHRD V3.3 *-* Q43505_SOLLC)
Solyc10g083440.2.1	-2.5072	0.00481388	0.0250242	Glycosyltransferase (AHRD V3.3 *** A0A2G3BGM7_CAPCH)
Solyc06g035980.4.1	-2.50436	2.52567e-18	5.42353e-16	Unknown protein
Solyc07g063600.3.1	-2.50107	9.60516e-07	1.75231e-05	Chlorophyll a-b binding protein, chloroplastic (AHRD V3.3 *** A0A2G3C388_CAPCH)
Solyc01g097680.2.1	-2.49029	1.44646e-09	5.45803e-08	Extensin-like protein Dif10 (AHRD V3.3 *-* Q43504_SOLLC)
Solyc06g066560.3.1	-2.48718	4.28015e-10	1.83635e-08	tonoplast intrinsic protein 2.5
Solyc07g061800.4.1	-2.48639	0.00038811	0.0031919	Heme-binding-like protein (AHRD V3.3 *** A0A2I0X1C8_9ASPA)
Solyc07g053840.1.1	-2.48514	4.14686e-08	1.0821e-06	Leucine-rich repeat-containing protein (AHRD V3.3 *** A0A2U1P4T2_ARTAN)
Solyc10g080690.2.1	-2.48377	4.23571e-05	0.000486666	Patatin (AHRD V3.3 *** A0A2G3BI67_CAPCH)
Solyc12g100110.1.1	-2.48325	2.83887e-15	3.72247e-13	Extensin-like protein Ext1 (AHRD V3.3 *** Q8VWM5_SOLLC)
Solyc04g007140.1.1	-2.48126	0.00748974	0.0353429	protein NIM1-INTERACTING 2-like (AHRD V3.3 *** XP_011071259.1)
Solyc02g090030.2.1	-2.47518	8.52843e-19	2.10502e-16	33 kDa oxygen-evolving protein
Solyc12g049050.2.1	-2.47286	0.0112605	0.0485702	Extensin-like protein Ext1 (AHRD V3.3 *** Q8VWM5_SOLLC)
Solyc02g082150.1.1	-2.46958	1.27068e-12	9.32129e-11	BnaCnng18720D protein (AHRD V3.3 *** A0A078IGP5_BRANA)
Solyc08g076630.3.1	-2.46465	1.09844e-10	5.26148e-09	Eukaryotic aspartyl protease family protein (AHRD V3.3 *** A0A2U1ML86_ARTAN)
Solyc02g071000.1.1	-2.453	6.69205e-05	0.000723353	Chlorophyll a-b binding protein, chloroplastic (AHRD V3.3 *** A0A2G3A7J8_CAPAN)
Solyc12g044710.1.1	-2.44899	9.05664e-09	2.86589e-07	hydroxyproline-rich glycoprotein family protein (AHRD V3.3 *** AT5G09530.1)
Solyc01g108490.3.1	-2.43409	7.7706e-20	2.29616e-17	Carboxypeptidase (AHRD V3.3 *** A0A1U8E723_CAPAN)
Solyc06g048560.2.1	-2.43024	0.000777582	0.00564878	Leucine-rich repeat protein kinase family protein (AHRD V3.3 *** A0A061H0G0_THECC)
Solyc03g033360.3.1	-2.42573	1.20789e-05	0.000164769	Eukaryotic aspartyl protease family protein (AHRD V3.3 *** A0A2U1KXY4_ARTAN)
Solyc03g123380.1.1	-2.42185	0.000461363	0.0036691	Unknown protein
Solyc08g061060.3.1	-2.41888	0.00039395	0.00323233	EG45-like domain containing protein (AHRD V3.3 *** A0A2K3LKU5_TRIPR)
Solyc06g064760.2.1	-2.41417	0.0112263	0.0484881	Reistance protein F (AHRD V3.3 *** I7AL54_SOLLC)
Solyc12g049110.1.1	-2.41077	5.17302e-12	3.33938e-10	Unknown protein
Solyc10g006230.3.1	-2.4094	5.37283e-12	3.43665e-10	Chlorophyll a-b binding protein, chloroplastic (AHRD V3.3 *** A0A2G3BCB0_CAPCH)
Solyc07g009380.4.1	-2.40699	4.8673e-08	1.24836e-06	xyloglucan endotransglucosylase-hydrolase 2
Solyc03g058910.3.1	-2.40672	0.00865921	0.0395796	Pectate lyase (AHRD V3.3 *** A0A2G2WYE5_CAPBA)
Solyc03g093270.3.1	-2.40338	1.35667e-14	1.53853e-12	NAD(P)-linked oxidoreductase superfamily protein (AHRD V3.3 *** A0A2U1L511_ARTAN)
Solyc03g114820.3.1	-2.40249	5.99477e-22	2.92263e-19	Adenine nucleotide alpha hydrolases-like superfamily protein (AHRD V3.3 *** Q9M9P7_ARATH)
Solyc01g005880.1.1	-2.40092	6.42983e-12	4.06319e-10	Extensin-like protein Dif10 (AHRD V3.3 *-* Q43504_SOLLC)
Solyc02g083285.2.1	-2.3986	3.36538e-12	2.28497e-10	Protein IQ-DOMAIN 31 (AHRD V3.3 *-* A0A1J3ETM1_NOCCA)
Solyc04g008080.1.1	-2.39782	0.000108498	0.00108757	Dirigent protein (AHRD V3.3 *** K4BNW4_SOLLC)
Solyc06g009280.1.1	-2.39523	2.7667e-14	2.9615e-12	ABC transporter B family member (AHRD V3.3 *** A0A2K3NLX3_TRIPR)
Solyc03g083870.4.1	-2.38825	2.30664e-18	5.04097e-16	Pectinesterase (AHRD V3.3 *** A0A200QC54_9MAGN)
Solyc04g009040.4.1	-2.38767	0.00449444	0.0237754	Receptor-kinase, putative (AHRD V3.3 *** B9SZK5_RICCO)
Solyc01g088105.1.1	-2.38155	4.02185e-05	0.000465665	Unknown protein
Solyc12g049070.1.1	-2.37656	3.92189e-09	1.34009e-07	extensin-like
Solyc06g076330.3.1	-2.37338	1.9748e-23	1.25549e-20	Laccase (AHRD V3.3 *** K4C9Z3_SOLLC)
Solyc01g067870.3.1	-2.36748	9.03137e-11	4.45831e-09	Peroxidase (AHRD V3.3 *** K4AX35_SOLLC)
Solyc12g049170.2.1	-2.36679	1.46973e-11	8.47112e-10	Extensin-like protein Ext1 (AHRD V3.3 *** Q8VWM5_SOLLC)
Solyc12g100090.1.1	-2.36593	5.86389e-11	3.02981e-09	Extensin-like protein Ext1 (AHRD V3.3 *** Q8VWM5_SOLLC)
Solyc03g006710.1.1	-2.35929	0.000113549	0.0011269	Calcium-binding protein PBP1 (AHRD V3.3 *** A0A1U8F7L1_CAPAN)
Solyc12g017870.2.1	-2.35015	1.07761e-16	1.76627e-14	Peroxidase (AHRD V3.3 *** K4DDB5_SOLLC)
Solyc10g037880.3.1	-2.33812	4.36085e-28	6.53504e-25	Blue copper protein (AHRD V3.3 *** A0A2I0WGC8_9ASPA)
Solyc04g083140.2.1	-2.3306	0.00891921	0.0404857	Cytochrome (AHRD V3.3 *** A0A1U8F0H8_CAPAN)
Solyc02g079070.4.1	-2.32182	0.0103991	0.0457354	IQ motif (AHRD V3.3 *-* A0A200RBW2_9MAGN)
Solyc03g083370.3.1	-2.31964	0.000116107	0.00114848	GDSL esterase/lipase (AHRD V3.3 *** A0A1U8G8S0_CAPAN)
Solyc02g014220.3.1	-2.31382	7.86953e-18	1.54302e-15	Endoglucanase (AHRD V3.3 *** A0A2G3D2B5_CAPCH)
Solyc12g007270.3.1	-2.3032	1.1423e-12	8.44022e-11	Xyloglucan endotransglucosylase/hydrolase (AHRD V3.3 *** A0A2G2X3I0_CAPBA)
Solyc07g052530.3.1	-2.29845	8.71024e-29	1.4057e-25	Peroxidase (AHRD V3.3 *** K4CFF2_SOLLC)
Solyc02g082090.3.1	-2.2977	3.62733e-15	4.54962e-13	Peroxidase (AHRD V3.3 *** K4BA79_SOLLC)
Solyc03g083730.1.1	-2.29741	0.00177397	0.0112407	Plant invertase/pectin methylesterase inhibitor superfamily protein, putative (AHRD V3.3 *** A0A061G4U8_THECC)
Solyc09g090600.3.1	-2.28994	1.63774e-32	4.90854e-29	acid phosphatase 1-like (AHRD V3.3 *** A0A1U7W5M1_NICSY)
Solyc01g006520.3.1	-2.28649	2.47035e-09	8.79932e-08	Receptor-like protein kinase (AHRD V3.3 *** A0A2U1PPA0_ARTAN)
Solyc08g007130.4.1	-2.28556	0.000362623	0.0030023	Beta-amylase (AHRD V3.3 *** A0A2G3DCL2_CAPCH)
Solyc02g079460.1.1	-2.28266	1.41021e-07	3.17064e-06	FAD-binding Berberine family protein (AHRD V3.3 *** A0A2U1MQE5_ARTAN)
Solyc04g008780.4.1	-2.28136	0.0053413	0.0271464	Tetraketide alpha-pyrone reductase 1 (AHRD V3.3 *** A0A1U8GMD2_CAPAN)
Solyc07g066640.3.1	-2.28134	0.000162451	0.00151883	transglycosylase (AHRD V3.3 *** AT1G16290.2)
Solyc11g012420.2.1	-2.27227	2.52675e-31	6.6264e-28	Cytochrome b561 and DOMON domain-containing protein (AHRD V3.3 *** A0A2G2VD03_CAPBA)
Solyc11g069250.2.1	-2.26763	5.72716e-06	8.73525e-05	Fasciclin-like arabinogalactan protein 12 (AHRD V3.3 *** A0A1J6K653_NICAT)
Solyc05g052890.3.1	-2.26693	0.00133747	0.00889107	Plant/protein (AHRD V3.3 *** Q84WZ5_ARATH)
Solyc04g056580.3.1	-2.26497	3.72491e-06	5.98381e-05	Transmembrane protein, putative (DUF2358) (AHRD V3.3 *** Q8L604_ARATH)
Solyc08g076883.1.1	-2.26401	0.0035899	0.0198409	Unknown protein
Solyc03g098060.3.1	-2.2593	2.14056e-06	3.61005e-05	zinc-finger homeodomain protein 11-like (AHRD V3.3 *** A0A2I4EVI3_9ROSI)
Solyc12g019640.2.1	-2.25857	2.51592e-07	5.36423e-06	Pleiotropic drug resistance protein (AHRD V3.3 *-* C8CA13_CUCSA)
Solyc02g064945.1.1	-2.25726	7.46462e-09	2.40935e-07	Glucuronoxylan 4-o-methyltransferase 1-like protein (AHRD V3.3 *** A0A2K3MTC9_TRIPR)
Solyc03g078620.1.1	-2.24788	0.00219794	0.0134322	C2 calcium/lipid-binding domain, CaLB (AHRD V3.3 *** A0A2U1M378_ARTAN)
Solyc03g116060.4.1	-2.24473	2.51004e-16	3.87211e-14	Gibberellin-regulated protein 6 (AHRD V3.3 *** A0A2G3CZG9_CAPCH)
Solyc12g005783.1.1	-2.23994	2.06232e-21	8.8301e-19	Peroxidase (AHRD V3.3 *** K4CMV0_SOLLC)
Solyc08g061010.4.1	-2.23276	3.71578e-06	5.97372e-05	Major facilitator superfamily protein (AHRD V3.3 *** A0A1P8AZ62_ARATH)
Solyc11g010960.2.1	-2.22949	0.00337683	0.0189478	Alcohol dehydrogenase (AHRD V3.3 *** A0A1Y1I027_KLENI)
Solyc01g095850.1.1	-2.22907	0.00926561	0.041742	RING/U-box superfamily protein (AHRD V3.3 *** A0A2U1MJ85_ARTAN)
Solyc12g049190.3.1	-2.22401	8.18546e-17	1.36294e-14	Hcr2-0B (AHRD V3.3 *** Q9ZTJ9_SOLLC)
Solyc08g007600.2.1	-2.21311	1.07141e-06	1.92451e-05	Subtilisin-like protease (AHRD V3.3 *** Q9LWA3_SOLLC)
Solyc12g049090.3.1	-2.21274	3.31795e-07	6.87123e-06	Extensin-like protein Ext1 (AHRD V3.3 *** Q8VWM5_SOLLC)
Solyc03g115690.1.1	-2.20307	4.49075e-16	6.65803e-14	transmembrane protein (AHRD V3.3 *** AT5G61340.2)
Solyc08g005280.2.1	-2.19712	6.78655e-07	1.29556e-05	Cellulose synthase (AHRD V3.3 *** A0A2U1KRA4_ARTAN)
Solyc10g076700.2.1	-2.19435	0.0112673	0.0485896	Rhodanese-like domain-containing protein 10 (AHRD V3.3 *** A0A1U8EI03_CAPAN)
Solyc06g072530.3.1	-2.19278	1.67723e-13	1.47231e-11	CASP-like protein (AHRD V3.3 *** A0A328D0P9_9ASTE)
Solyc02g032040.1.1	-2.19206	0.000217258	0.00194457	Dirigent protein (AHRD V3.3 *** K4B5F0_SOLLC)
Solyc12g087860.3.1	-2.19182	7.70087e-06	0.00011251	RING/U-box superfamily protein (AHRD V3.3 *** A0A2H1ZED7_ARATH)
Solyc01g094380.2.1	-2.19168	1.0851e-09	4.21583e-08	O-glucosyltransferase rumi-like protein (AHRD V3.3 *** A0A1J3GP63_NOCCA)
Solyc03g031450.3.1	-2.19055	0.00332379	0.0187354	Basic helix-loop-helix (BHLH) DNA-binding superfamily protein (AHRD V3.3 *-* A0A2U1PMP2_ARTAN)
Solyc08g065420.3.1	-2.19012	0.00648516	0.0316343	bell-like homeodomain protein 4
Solyc08g006930.3.1	-2.18834	3.579e-07	7.36152e-06	photosystem I reaction center subunit psaK, chloroplastic (AHRD V3.3 *** A0A2G3AN63_CAPAN)
Solyc04g009030.3.1	-2.1873	1.14433e-07	2.64116e-06	Glyceraldehyde-3-phosphate dehydrogenase (AHRD V3.3 *** A0A0A8IBT8_NICBE)
Solyc01g017720.2.1	-2.18542	0.00196346	0.0122074	Unknown protein
Solyc02g065230.3.1	-2.18232	0.00309911	0.0177068	Cytochrome P450 (AHRD V3.3 *** A0A1U9X5Y9_THAGA)
Solyc01g105550.1.1	-2.17778	4.49173e-06	7.02734e-05	Acylsugar acetyltransferase (AHRD V3.3 *** K4HRU2_SOLHA)
Solyc01g087710.2.1	-2.17761	7.21565e-05	0.000769081	UPF0114 domain-containing protein (AHRD V3.3 *** A0A1Q3C5D7_CEPFO)
Solyc04g005660.4.1	-2.17746	0.00507231	0.0261018	transcription factor PRE6-like (AHRD V3.3 *** A0A2I4HLH0_9ROSI)
Solyc01g009370.2.1	-2.1707	1.76253e-21	7.7037e-19	Cytochrome P450 (AHRD V3.3 *** A0A2U1MC34_ARTAN)
Solyc11g039570.3.1	-2.17021	1.06554e-13	9.71961e-12	Peroxidase (AHRD V3.3 *** K4D7T6_SOLLC)
Solyc07g043200.2.1	-2.16847	1.88147e-11	1.06111e-09	Zinc transporter protein (AHRD V3.3 *** A5BDR3_VITVI)
Solyc09g064500.3.1	-2.16617	9.55017e-07	1.7438e-05	Photosystem II reaction center Psb28 protein (AHRD V3.3 *** A0A1U8EF03_CAPAN)
Solyc01g009410.3.1	-2.16595	6.64176e-12	4.15889e-10	Peroxidase (AHRD V3.3 *** K4ATD7_SOLLC)
Solyc12g011450.2.1	-2.15582	1.93295e-13	1.66202e-11	Chlorophyll a-b binding protein, chloroplastic (AHRD V3.3 *** A0A1U8G201_CAPAN)
Solyc01g107720.3.1	-2.15405	5.33673e-05	0.000594924	Late embryogenesis abundant protein-related / LEA protein-like protein (AHRD V3.3 *-* A0A178VGJ3_ARATH)
Solyc07g043700.3.1	-2.15041	4.69267e-14	4.62217e-12	HXXXD-type acyl-transferase family protein (AHRD V3.3 *** F4JBC7_ARATH)
Solyc04g073940.4.1	-2.14822	0.0023638	0.0142392	TPR repeat-containing thioredoxin TTL1-like protein (AHRD V3.3 *** A0A2K3PMP8_TRIPR)
Solyc01g110825.1.1	-2.1455	1.06069e-11	6.30404e-10	Auxin-responsive protein SAUR21 (AHRD V3.3 *** A0A2G2XY95_CAPAN)
Solyc12g038680.1.1	-2.14142	2.68107e-05	0.000328556	Cysteine/Histidine-rich C1 domain family protein (AHRD V3.3 *-* Q9FIY8_ARATH)
Solyc09g010960.3.1	-2.13757	0.00389126	0.0211907	WRKY transcription factor 49
Solyc03g006470.3.1	-2.13302	7.29707e-05	0.000776331	CBS domain-containing protein (AHRD V3.3 *** A0A1Q3C2E1_CEPFO)
Solyc05g015497.1.1	-2.12963	3.59136e-12	2.39958e-10	Glucuronoxylan 4-O-methyltransferase 1 (AHRD V3.3 *** A0A2G2VDV8_CAPBA)
Solyc05g008145.1.1	-2.12436	0.00378084	0.0206999	DNA-directed RNA polymerase subunit beta (AHRD V3.3 *-* A0A2G2XEV3_CAPBA)
Solyc11g066640.1.1	-2.12317	7.57772e-07	1.41947e-05	Transferase (AHRD V3.3 *** A0A200R9R6_9MAGN)
Solyc02g079520.3.1	-2.12149	2.53635e-07	5.40229e-06	Calcium-binding protein PBP1 (AHRD V3.3 *** A0A1U8G283_CAPAN)
Solyc06g083000.1.1	-2.12092	6.44044e-06	9.70383e-05	Calmodulin-like protein 5 (AHRD V3.3 *** A0A2G2WMY5_CAPBA)
Solyc08g066590.3.1	-2.12053	3.98437e-07	8.11574e-06	Late embryogenesis abundant protein-related / LEA protein-like protein (AHRD V3.3 *-* A0A178VGJ3_ARATH)
Solyc09g008590.4.1	-2.1198	5.97168e-17	1.01858e-14	pistil-specific extensin-like protein (AHRD V3.3 *** A0A2I4E0V8_9ROSI),Pfam:PF01190
Solyc04g008000.3.1	-2.11924	2.03659e-05	0.000259269	Calcium-dependent protein kinase (AHRD V3.3 *-* CDPK_DAUCA)
Solyc03g031770.3.1	-2.11672	0.00684628	0.0329522	CRIB domain-containing protein RIC10 (AHRD V3.3 *** A0A2G2ZLR9_CAPAN)
Solyc04g014510.3.1	-2.11587	8.8476e-38	4.64057e-34	glutamine synthase
Solyc11g006450.3.1	-2.11265	2.49596e-09	8.84549e-08	RING/U-box superfamily protein (AHRD V3.3 *** A0A2U1MY73_ARTAN)
Solyc09g007660.1.1	-2.11087	1.99583e-12	1.39575e-10	Fasciclin-like arabinogalactan protein 11 (AHRD V3.3 *** A0A2G3BJB8_CAPCH)
Solyc02g069460.3.1	-2.11036	4.52827e-10	1.92704e-08	Photosystem I reaction center subunit III, chloroplastic (AHRD V3.3 *** A0A1U8FJA0_CAPAN)
Solyc04g015700.1.1	-2.10513	9.27799e-05	0.000947674	hypothetical protein (AHRD V3.3 *-* AT3G57450.1)
Solyc09g061890.3.1	-2.10503	5.69545e-13	4.42557e-11	Pectate lyase (AHRD V3.3 *** A0A2G2VZE8_CAPBA)
Solyc01g096380.1.1	-2.10339	7.91356e-09	2.53476e-07	S-adenosyl-L-methionine-dependent methyltransferases superfamily protein (AHRD V3.3 *** F4HS78_ARATH)
Solyc10g018150.2.1	-2.10145	5.88265e-05	0.000647563	Cytochrome P450 (AHRD V3.3 *** A0A200Q2X8_9MAGN)
Solyc11g065350.2.1	-2.09952	0.000426865	0.00345364	ABC transporter G family member 12 (AHRD V3.3 *** A0A2G3B9R8_CAPCH)
Solyc04g076770.3.1	-2.09932	1.04075e-10	5.01954e-09	Peroxidase (AHRD V3.3 *** K4BUB5_SOLLC)
Solyc04g015820.1.1	-2.09912	0.000102861	0.00103751	Unknown protein
Solyc03g096760.1.1	-2.09815	1.26779e-05	0.000171381	Protein RESPONSE TO LOW SULFUR 2 (AHRD V3.3 *-* LSU2_ARATH)
Solyc03g121100.4.1	-2.09616	4.19406e-11	2.24468e-09	acid phosphatase 1-like (AHRD V3.3 *** A0A2G3A413_CAPAN)
Solyc09g014240.4.1	-2.09362	7.1392e-21	2.58242e-18	Laccase (AHRD V3.3 *** K4CRQ1_SOLLC)
Solyc07g052540.3.1	-2.0932	2.7086e-23	1.67136e-20	Peroxidase (AHRD V3.3 *** K4CFF3_SOLLC)
Solyc09g008500.3.1	-2.08801	0.000625912	0.00470741	Non-specific lipid-transfer protein (AHRD V3.3 *** K4CQN8_SOLLC)
Solyc08g080060.4.1	-2.08726	1.16618e-14	1.33696e-12	Expansin (AHRD V3.3 *** K4CP06_SOLLC)
Solyc04g015610.3.1	-2.0872	1.49617e-14	1.66967e-12	DUF642 domain-containing protein (AHRD V3.3 *** A0A1Q3AUQ6_CEPFO)
Solyc03g123770.1.1	-2.08487	6.96075e-06	0.000103352	Unknown protein
Solyc04g014550.3.1	-2.08453	1.03558e-05	0.000145037	TPX2 (Targeting protein for Xklp2) protein family (AHRD V3.3 *** F4K773_ARATH)
Solyc12g055970.3.1	-2.08404	3.39782e-06	5.49624e-05	Endoglucanase (AHRD V3.3 *** A0A2G3B3J7_CAPCH)
Solyc06g072550.3.1	-2.07169	7.06163e-25	6.16297e-22	CASP-like protein (AHRD V3.3 *** A0A2I4FJL7_9ROSI)
Solyc04g074380.4.1	-2.06206	3.52181e-08	9.4573e-07	Glycosyltransferase (AHRD V3.3 *** A0A2G3CNS7_CAPCH)
Solyc10g076830.2.1	-2.0619	2.0886e-05	0.000265121	Laccase (AHRD V3.3 *** K4D225_SOLLC)
Solyc11g006300.2.1	-2.05608	0.00614147	0.0302673	3-oxo-5-alpha-steroid 4-dehydrogenase (AHRD V3.3 *** A0A200PYH0_9MAGN)
Solyc08g067500.1.1	-2.05558	1.80693e-10	8.40561e-09	Non-specific lipid-transfer protein (AHRD V3.3 *** K4CLX6_SOLLC)
Solyc03g044580.1.1	-2.05432	0.00578233	0.0289283	precursor of CEP5-like (AHRD V3.3 -** XP_021691795.1)
Solyc06g054060.1.1	-2.04995	0.0062625	0.0307843	Lipid transfer protein (AHRD V3.3 *** Q5MJA5_CAPAN)
Solyc05g005870.3.1	-2.0489	8.0298e-10	3.22113e-08	WAT1-related protein (AHRD V3.3 *** K4BWB4_SOLLC)
Solyc08g079080.5.1	-2.04798	2.75592e-14	2.9615e-12	Lycopersicon esculentum invertase 9
Solyc12g099650.2.1	-2.04654	0.000462531	0.00367433	Photosystem II 5 kDa protein, chloroplastic (AHRD V3.3 *** A0A2G3B5K3_CAPCH)
Solyc07g049460.3.1	-2.04511	4.34301e-14	4.38059e-12	laccase
Solyc06g051040.4.1	-2.04498	1.25714e-10	5.9537e-09	Mitotic checkpoint serine/threonine-protein kinase BUB1-like protein (AHRD V3.3 *-* A0A2K3L1J0_TRIPR)
Solyc07g053790.2.1	-2.04402	0.00897573	0.0407159	Protein TPX2 (AHRD V3.3 *** A0A2G2Z491_CAPAN)
Solyc12g094530.1.1	-2.04155	0.00186077	0.0117093	DUF241 domain protein%2C putative (DUF241) (AHRD V3.3 *** AT1G76210.1)
Solyc03g110890.1.1	-2.03912	0.00175497	0.0111401	glucuronoxylan 4-O-methyltransferase 1 (AHRD V3.3 *** A0A2I4F5K0_9ROSI)
Solyc10g083300.2.1	-2.03675	5.59971e-10	2.34028e-08	invertase 8
Solyc08g076620.1.1	-2.03579	0.00098985	0.00689935	Eukaryotic aspartyl protease family protein (AHRD V3.3 *** A0A2U1KXX4_ARTAN)
Solyc06g008560.2.1	-2.03446	2.15346e-08	6.16366e-07	ternary complex factor MIP1 leucine-zipper protein (Protein of unknown function%2C DUF547) (AHRD V3.3 *** AT2G39690.1)
Solyc05g056440.3.1	-2.0317	7.69938e-05	0.000810909	Small auxin up-regulated RNA57
Solyc08g007780.3.1	-2.03067	1.33618e-09	5.08768e-08	Expansin (AHRD V3.3 *** K4CIR5_SOLLC)
Solyc01g110555.1.1	-2.02694	7.73904e-11	3.85665e-09	Auxin responsive SAUR protein (AHRD V3.3 *** A0A2U1P3N8_ARTAN)
Solyc03g093060.1.1	-2.02299	0.000216036	0.0019359	Bifunctional inhibitor/lipid-transfer protein/seed storage 2S albumin superfamily protein (AHRD V3.3 *** A0A2U1PU47_ARTAN)
Solyc05g046000.4.1	-2.0211	5.35783e-20	1.65305e-17	Peroxidase (AHRD V3.3 *** K4C0T3_SOLLC)
Solyc09g005630.3.1	-2.02059	1.09395e-16	1.77916e-14	Protein trichome birefringence-like 3 (AHRD V3.3 *** A0A1U8EDH5_CAPAN)
Solyc06g035490.3.1	-2.01813	6.99266e-12	4.34042e-10	bHLH transcription factor 042
Solyc04g077960.1.1	-2.01495	9.95986e-06	0.000139958	Transcription factor bHLH85 (AHRD V3.3 *** A0A1U8GC08_CAPAN)
Solyc01g095830.3.1	-2.00913	6.2605e-11	3.20354e-09	RING/U-box superfamily protein (AHRD V3.3 *** A0A2U1MJ85_ARTAN)
Solyc08g075830.4.1	-2.00375	1.43658e-25	1.43521e-22	Peroxidase (AHRD V3.3 *** K4CMV0_SOLLC)
Solyc11g067340.1.1	-2.00161	3.59998e-13	2.88273e-11	Acylsugar acyltransferase 3 (AHRD V3.3 *** A0A0B5J4M4_SOLHA)
Solyc07g052660.1.1	-1.99836	2.46561e-21	9.76011e-19	Early nodulin-like protein 1-like (AHRD V3.3 *-* A0A2K3MXQ1_TRIPR)
Solyc03g093380.2.1	-1.99667	2.49472e-09	8.84549e-08	Protein kinase family protein (AHRD V3.3 *** A0A1P8AW67_ARATH)
Solyc07g049240.3.1	-1.99603	4.24664e-14	4.30409e-12	Peroxidase (AHRD V3.3 *** K4CF27_SOLLC)
Solyc06g007180.3.1	-1.98638	1.91511e-18	4.41527e-16	asparagine synthetase 1
Solyc04g081860.3.1	-1.98336	5.70944e-17	9.81837e-15	Peroxidase (AHRD V3.3 *** K4BVR5_SOLLC)
Solyc04g050170.4.1	-1.97427	8.63113e-15	9.94951e-13	Leucine-rich receptor-like protein kinase family protein (AHRD V3.3 *** A0A061F8K0_THECC)
Solyc10g076660.2.1	-1.97315	9.92793e-09	3.10414e-07	2-oxoglutarate (2OG) and Fe(II)-dependent oxygenase superfamily protein (AHRD V3.3 *** F4J670_ARATH)
Solyc06g074200.4.1	-1.97008	2.04425e-12	1.42124e-10	Photosystem I subunit O (AHRD V3.3 *** A0A1U8H3A3_CAPAN)
Solyc03g096460.4.1	-1.96835	2.75936e-13	2.27919e-11	wound/stress protein AY568721
Solyc06g065970.1.1	-1.96297	2.79296e-08	7.72942e-07	Bifunctional inhibitor/lipid-transfer protein/seed storage 2S albumin superfamily protein (AHRD V3.3 *** A0A2U1PU47_ARTAN)
Solyc12g088190.2.1	-1.95821	4.24832e-07	8.58668e-06	Amino acid permease (AHRD V3.3 *** A0A2K3NUE8_TRIPR)
Solyc07g009030.3.1	-1.95666	4.45233e-29	8.32641e-26	defensin-like protein 19 (AHRD V3.3 *** A0A1S4AH79_TOBAC)
Solyc03g025190.4.1	-1.95199	0.00344923	0.0192306	anthocyanin permease
Solyc02g081990.3.1	-1.95111	1.72519e-35	6.03242e-32	Pectinesterase (AHRD V3.3 *** A0A2G2XFI1_CAPBA)
Solyc10g007970.2.1	-1.95037	0.00476267	0.0248189	WRKY transcription factor 77
Solyc10g083410.1.1	-1.95007	1.72034e-05	0.000223209	Peptidoglycan-binding LysM domain-containing protein (AHRD V3.3 *** A0A2U1LRW5_ARTAN)
Solyc06g082860.4.1	-1.94949	2.28436e-14	2.4832e-12	Cytochrome and DOMON domain-containing protein (AHRD V3.3 *** A0A2G2ZEL3_CAPAN)
Solyc10g005190.1.1	-1.94803	6.3469e-11	3.23199e-09	Root hair specific 4 (AHRD V3.3 *** Q9SY31_ARATH)
Solyc05g055320.3.1	-1.94571	2.04583e-12	1.42124e-10	Peroxidase (AHRD V3.3 *** K4C2K8_SOLLC)
Solyc07g044710.2.1	-1.94295	1.1092e-08	3.4172e-07	3-hydroxyisobutyryl-CoA hydrolase-like protein 5 (AHRD V3.3 *** A0A2G2XQ26_CAPBA)
Solyc07g043640.3.1	-1.94019	2.02555e-09	7.3778e-08	AMP-dependent synthetase/ligase (AHRD V3.3 *** A0A200QNF3_9MAGN)
Solyc02g030220.1.1	-1.93838	4.17041e-05	0.000480216	Extensin-like protein Dif10 (AHRD V3.3 *-* Q43504_SOLLC)
Solyc04g071080.2.1	-1.93457	1.76868e-11	1.00289e-09	extensin-like, partial (AHRD V3.3 *-* XP_019067293.2)
Solyc12g098270.1.1	-1.93207	4.34637e-07	8.75955e-06	acanthoscurrin-1-like (AHRD V3.3 *-* XP_010314853.1)
Solyc10g086535.1.1	-1.92911	0.00513625	0.0263404	Unknown protein
Solyc01g079920.3.1	-1.92872	8.3911e-15	9.78029e-13	Eukaryotic aspartyl protease family protein (AHRD V3.3 *** A0A2U1M5P2_ARTAN)
Solyc02g072050.2.1	-1.92687	0.00252086	0.0149654	calcium/calcium/calmodulin-dependent Serine/Threonine-kinase (AHRD V3.3 *** AT2G47010.2)
Solyc06g075570.2.1	-1.91908	2.42043e-08	6.84374e-07	Respiratory burst oxidase (AHRD V3.3 *** A0A2U1P7U6_ARTAN)
Solyc02g067190.4.1	-1.91755	5.6296e-09	1.87773e-07	Casparian strip membrane protein 1 (AHRD V3.3 *** CASP1_SOLTU)
Solyc11g066390.2.1	-1.91752	4.96298e-44	5.20617e-40	superoxide dismutase 3
Solyc02g083640.4.1	-1.91576	2.22742e-05	0.000279494	Protein POLLENLESS 3-LIKE 2 (AHRD V3.3 *** A0A2G3D7L3_CAPCH)
Solyc09g008270.3.1	-1.91057	0.000749967	0.00548063	translation initiation factor (AHRD V3.3 *** AT2G36885.1)
Solyc04g055140.1.1	-1.90931	0.000236131	0.00207542	C2 calcium/lipid-binding domain, CaLB (AHRD V3.3 *-* A0A2U1PHW5_ARTAN)
Solyc11g007370.3.1	-1.90606	1.40798e-09	5.32242e-08	Glycosyltransferase (AHRD V3.3 *** A0A288W8G7_GARJA)
Solyc12g089370.2.1	-1.90045	5.68804e-09	1.89421e-07	Peroxidase (AHRD V3.3 *** K4DH08_SOLLC)
Solyc10g006500.4.1	-1.8965	1.84235e-08	5.35352e-07	Hexosyltransferase (AHRD V3.3 *** A0A2G3ATI8_CAPCH)
Solyc10g052600.1.1	-1.89452	1.97945e-09	7.2603e-08	S-adenosyl-L-methionine-dependent methyltransferases superfamily protein (AHRD V3.3 *-* Q9M144_ARATH)
Solyc07g063350.3.1	-1.8852	1.6301e-05	0.000212838	COP1-interacting protein 7 (AHRD V3.3 *** CIP7_ARATH)
Solyc01g107370.3.1	-1.88347	1.31187e-05	0.000176091	Gibberellin-regulated protein (AHRD V3.3 *** K0E174_POPTO)
Solyc05g007950.4.1	-1.88237	0.00438651	0.0233398	LERNALE L.esculentum ribonuclease le
Solyc01g096405.1.1	-1.87998	0.00856895	0.0392792	Unknown protein
Solyc07g009050.3.1	-1.8772	1.28574e-20	4.42211e-18	defensin-like protein 19 (AHRD V3.3 *** A0A1S4AH79_TOBAC)
Solyc12g005787.1.1	-1.87717	1.04299e-16	1.72299e-14	Peroxidase (AHRD V3.3 *** K4CMV0_SOLLC)
Solyc09g010430.1.1	-1.87394	2.75236e-14	2.9615e-12	Unknown protein
Solyc09g011090.3.1	-1.8725	3.22683e-07	6.70287e-06	Glycosyltransferase (AHRD V3.3 *** O80941_ARATH)
Solyc09g089990.3.1	-1.87025	0.000111043	0.00110779	Germin-like protein subfamily 1 member 20 (AHRD V3.3 *** A0A2G3CSE3_CAPCH)
Solyc02g088080.2.1	-1.86974	8.35493e-11	4.14389e-09	Unknown protein
Solyc02g078450.3.1	-1.86937	1.50764e-10	7.04461e-09	tetraspanin-19-like (AHRD V3.3 *** A0A2I4GWP3_9ROSI)
Solyc08g007680.1.1	-1.86622	5.7205e-08	1.43904e-06	Subtilisin-like protease (AHRD V3.3 *** Q9LWA3_SOLLC)
Solyc03g115710.1.1	-1.86541	1.05093e-08	3.26162e-07	Receptor-like protein kinase THESEUS 1 (AHRD V3.3 *** A0A1U8G3K7_CAPAN)
Solyc02g079950.3.1	-1.8578	9.66532e-18	1.87758e-15	photosystem II oxygen-evolving complex protein 3
Solyc08g013670.3.1	-1.85774	9.61608e-07	1.75278e-05	Photosystem I reaction center subunit N, chloroplastic (AHRD V3.3 *** A0A1U8EZE3_CAPAN)
Solyc06g082940.3.1	-1.85613	4.26134e-09	1.44198e-07	Photosystem I reaction center subunit XI protein (AHRD V3.3 *** A0A2U1MVK5_ARTAN)
Solyc05g053150.2.1	-1.85102	0.000430691	0.00347668	R2R3MYB transcription factor 71
Solyc10g087015.1.1	-1.84673	0.00217549	0.0133261	Cytochrome (AHRD V3.3 *** A0A1U8F0H8_CAPAN)
Solyc05g052500.4.1	-1.84096	2.42312e-21	9.76011e-19	S-adenosyl-L-methionine-dependent methyltransferases superfamily protein (AHRD V3.3 *** A0A1I9LPV2_ARATH)
Solyc12g006140.2.1	-1.83969	0.000144933	0.00137775	Cab-5 gene encoding chlorophyll a/b-binding protein
Solyc07g065420.1.1	-1.83441	1.18221e-13	1.07372e-11	Protein MIZU-KUSSEI 1 (AHRD V3.3 *** A0A1U8GTQ9_CAPAN)
Solyc02g072490.3.1	-1.83317	0.00154527	0.0100154	O-fucosyltransferase (AHRD V3.3 *** A0A2P5EP10_TREOI)
Solyc11g017390.2.1	-1.83204	0.000865688	0.00618313	hypothetical protein (AHRD V3.3 --* AT1G71910.2)
Solyc07g009060.4.1	-1.83126	5.85124e-30	1.22759e-26	defensin-like protein 19 (AHRD V3.3 *** A0A1S4AH79_TOBAC)
Solyc05g055860.4.1	-1.82865	7.40745e-05	0.000786082	Serine/threonine-protein kinase (AHRD V3.3 *** A0A2G3CIV2_CAPCH)
Solyc01g107140.3.1	-1.81707	2.12828e-06	3.59221e-05	Transcription factor (AHRD V3.3 *** A0A2G2V728_CAPBA)
Solyc03g113050.1.1	-1.81584	0.00603978	0.0299067	LAG1 longevity assurance-like protein 1 (AHRD V3.3 *** A0A2G2WRI1_CAPBA)
Solyc04g074470.1.1	-1.81243	8.76691e-23	5.10916e-20	Protein EXORDIUM-like 2 (AHRD V3.3 *** A0A2G3CNT3_CAPCH)
Solyc06g064960.3.1	-1.80507	8.49418e-06	0.000122648	GDSL esterase/lipase 5-like (AHRD V3.3 *** A0A1U8FAQ0_CAPAN)
Solyc01g091300.3.1	-1.80432	0.00258662	0.0152952	Secretory 1A (AHRD V3.3 *** A0A1P8AMM7_ARATH)
Solyc03g033750.2.1	-1.79705	7.97931e-08	1.92642e-06	AAA-ATPase At3g50940-like (AHRD V3.3 *-* A0A2I4EX93_9ROSI)
Solyc08g080930.1.1	-1.79515	2.6785e-05	0.000328556	Xyloglucan galactosyltransferase KATAMARI1 (AHRD V3.3 *** A0A1J3J5G4_NOCCA)
Solyc09g061715.1.1	-1.79479	9.69162e-12	5.82202e-10	hypothetical protein (AHRD V3.3 *-* AT3G24750.1)
Solyc03g005555.1.1	-1.79022	2.77486e-13	2.283e-11	Phosphate transporter (AHRD V3.3 *** Q9AYT2_TOBAC)
Solyc07g055240.1.1	-1.79002	0.00102509	0.00710019	ovate family protein 15
Solyc01g110580.2.1	-1.78156	0.00286218	0.0166018	Small auxin up-regulated RNA5
Solyc05g046030.4.1	-1.78109	7.5652e-17	1.26974e-14	Peroxidase (AHRD V3.3 *** K4C0T6_SOLLC)
Solyc01g109860.3.1	-1.78086	1.3325e-11	7.74402e-10	Sec14p-like phosphatidylinositol transfer family protein (AHRD V3.3 *** A0A2U1QM07_ARTAN)
Solyc03g007960.3.1	-1.77589	8.25715e-09	2.62876e-07	beta-carotene hydroxylase-2
Solyc03g120830.3.1	-1.77341	2.59594e-10	1.16873e-08	transmembrane protein (AHRD V3.3 *** AT1G52155.1)
Solyc12g014200.3.1	-1.77318	0.00751714	0.0354324	Protein trichome birefringence-like 31 (AHRD V3.3 *** A0A2G2X2L8_CAPBA)
Solyc03g032040.3.1	-1.77163	7.52045e-16	1.05186e-13	Tonoplast monosaccharide transporter 1
Solyc05g050730.1.1	-1.77128	3.82104e-12	2.53688e-10	Stigma-specific Stig1 family protein (AHRD V3.3 *** A0A2U1LAF4_ARTAN)
Solyc12g100220.2.1	-1.77002	1.93796e-11	1.09004e-09	NAD(P)-binding Rossmann-fold superfamily protein (AHRD V3.3 *** Q94AL3_ARATH)
Solyc02g089130.4.1	-1.76924	1.86034e-06	3.16767e-05	COBRA-like protein (AHRD V3.3 *** K4BC67_SOLLC)
Solyc02g085110.4.1	-1.76877	8.76438e-06	0.000125771	Laccase (AHRD V3.3 *** K4BB25_SOLLC)
Solyc04g080560.2.1	-1.7668	0.000966847	0.00676825	Unknown protein
Solyc05g005540.4.1	-1.76067	2.21703e-09	8.01952e-08	Polygalacturonase-1 non-catalytic subunit beta (AHRD V3.3 *** GP1_SOLLC)
Solyc02g089030.1.1	-1.76056	0.000428384	0.00346339	LONGIFOLIA protein (AHRD V3.3 *-* A8MQH9_ARATH)
Solyc08g005620.3.1	-1.75356	0.00542177	0.0274098	Gibberellin-regulated protein (AHRD V3.3 *** K0E174_POPTO)
Solyc04g007670.1.1	-1.75225	2.9357e-07	6.15403e-06	leucine-rich repeat extensin-like protein 3 (AHRD V3.3 --* XP_022878514.1)
Solyc11g040140.2.1	-1.75094	4.55629e-06	7.11243e-05	Xyloglucan endotransglucosylase/hydrolase (AHRD V3.3 *** A0A2G3CEF2_CAPCH)
Solyc08g067700.1.1	-1.7504	8.82494e-08	2.10156e-06	Photosystem II protein D2 (AHRD V3.3 *-* A0A2K3LJN2_TRIPR)
Solyc09g098380.3.1	-1.74326	0.00317783	0.0180729	Amino acid transporter (AHRD V3.3 *** A0A200PYC4_9MAGN)
Solyc11g056640.3.1	-1.74275	0.00672253	0.0325013	inactive rhomboid protein (AHRD V3.3 *** AT5G12930.1)
Solyc10g086710.3.1	-1.74025	2.85504e-21	1.10923e-18	PAR1 (AHRD V3.3 *** A0A200R4T9_9MAGN)
Solyc02g065190.3.1	-1.73925	3.40728e-10	1.49238e-08	Cytochrome P450 (AHRD V3.3 *** A0A1U9X5Y9_THAGA)
Solyc02g079540.2.1	-1.73813	0.00201761	0.0125013	G-type lectin S-receptor-like serine/threonine-protein kinase (AHRD V3.3 *** A0A2G2VAF2_CAPBA)
Solyc05g007790.3.1	-1.73371	1.06205e-18	2.56112e-16	Casparian strip membrane protein 1 (AHRD V3.3 *** CASP1_SOLDE)
Solyc06g054070.3.1	-1.73204	1.12286e-10	5.35398e-09	Non-specific lipid-transfer protein-like protein (AHRD V3.3 *** A0A1J6I240_NICAT)
Solyc12g009820.2.1	-1.73074	4.73764e-06	7.35719e-05	Monogalactosyldiacylglycerol synthase 3, chloroplastic (AHRD V3.3 *** A0A2G2X4B3_CAPBA)
Solyc01g088440.2.1	-1.72979	0.000112034	0.00111502	RING/U-box superfamily protein (AHRD V3.3 *-* A0A2U1LDD8_ARTAN)
Solyc09g007650.3.1	-1.72855	0.000316425	0.00266932	Fasciclin-like arabinogalactan protein 11 (AHRD V3.3 *** A0A2G3BJB7_CAPCH)
Solyc07g063370.2.1	-1.72684	0.0060518	0.0299404	Beta-glucosidase (AHRD V3.3 *** B6SYQ7_MAIZE)
Solyc08g061920.3.1	-1.72548	5.32893e-12	3.41899e-10	Cytokinin oxidase/dehydrogenase (AHRD V3.3 *** C3VPM8_SOLTU)
Solyc02g079980.3.1	-1.72528	5.96599e-05	0.000654808	Sulfite exporter TauE/SafE family protein 2 (AHRD V3.3 *** TAUE2_ARATH)
Solyc02g070940.1.1	-1.72421	1.32216e-06	2.3271e-05	Chlorophyll a-b binding protein, chloroplastic (AHRD V3.3 *** A0A2G3A7J8_CAPAN)
Solyc01g103360.4.1	-1.72272	9.02694e-08	2.14237e-06	Glucuronoxylan 4-O-methyltransferase 3 (AHRD V3.3 *** A0A1U8DVE2_CAPAN)
Solyc10g084780.3.1	-1.72255	3.61087e-08	9.63819e-07	Expansin (AHRD V3.3 *** K4D3R2_SOLLC)
Solyc12g019220.1.1	-1.72212	9.65486e-05	0.00098139	Pectin lyase-like superfamily protein (AHRD V3.3 *** A0A1I9LP65_ARATH)
Solyc03g034110.4.1	-1.72046	0.00123857	0.00833396	Homeobox-leucine zipper protein HOX14 (AHRD V3.3 *** A0A1U8GKM2_CAPAN)
Solyc02g082490.4.1	-1.71685	0.000138707	0.00132819	Protein phosphatase 2C family protein (AHRD V3.3 *** A0A2U1LH09_ARTAN)
Solyc08g005770.3.1	-1.71683	0.000134017	0.00128978	alcohol acyl transferase
Solyc11g006270.2.1	-1.71524	9.76948e-11	4.75554e-09	3-oxo-5-alpha-steroid 4-dehydrogenase (AHRD V3.3 *** A0A200PYH0_9MAGN)
Solyc12g100230.1.1	-1.71372	2.45129e-13	2.05712e-11	Omega-6 fatty acid desaturase (AHRD V3.3 *** Q461Q1_HEVBR)
Solyc10g054840.2.1	-1.71271	0.000104328	0.00105129	X-intrinsic protein 1.1
Solyc01g100100.4.1	-1.71091	5.32562e-10	2.23463e-08	RING/U-box superfamily protein (AHRD V3.3 *-* Q1G3M1_ARATH)
Solyc07g018370.3.1	-1.70565	3.70143e-05	0.000433832	protein SPEAR1-like (AHRD V3.3 *-* A0A2I4E6D8_9ROSI)
Solyc03g005200.3.1	-1.70509	8.50179e-21	3.02318e-18	Non-specific lipid-transfer protein-like protein (AHRD V3.3 *** A0A1J6K9J7_NICAT)
Solyc04g071580.3.1	-1.70402	3.97288e-10	1.71152e-08	Abscicic acid stress ripening 2
Solyc03g091000.1.1	-1.70278	8.58389e-10	3.41079e-08	Bifunctional inhibitor/lipid-transfer protein/seed storage 2S albumin superfamily protein (AHRD V3.3 *** A0A2U1PU47_ARTAN)
Solyc01g108630.3.1	-1.70077	0.00209872	0.0129124	nii1 nitrite reductase
Solyc10g081320.1.1	-1.70033	1.81425e-06	3.09454e-05	R2R3MYB transcription factor 69
Solyc06g048600.3.1	-1.69565	1.6539e-07	3.65784e-06	Response regulator 7
Solyc10g076570.2.1	-1.69272	0.000148007	0.00139937	Protein trichome birefringence-like 3 (AHRD V3.3 *** A0A1U8EDH5_CAPAN)
Solyc06g067910.3.1	-1.69126	9.91437e-09	3.10414e-07	DUF642 domain-containing protein (AHRD V3.3 *** A0A1Q3BMB3_CEPFO)
Solyc02g062510.3.1	-1.68846	5.44646e-31	1.26963e-27	Peroxidase (AHRD V3.3 *** K4B6D9_SOLLC)
Solyc07g055730.4.1	-1.68536	2.59308e-09	9.1127e-08	Protein trichome birefringence-like 43 (AHRD V3.3 *** A0A2G3C1G9_CAPCH)
Solyc03g093070.1.1	-1.68524	7.35664e-06	0.000108234	Bifunctional inhibitor/lipid-transfer protein/seed storage 2S albumin superfamily protein (AHRD V3.3 *** A0A2U1PU47_ARTAN)
Solyc02g077620.1.1	-1.68521	0.00093679	0.00659083	Sulfotransferase (AHRD V3.3 *** A0A1Q3AUR5_CEPFO)
Solyc01g009505.1.1	-1.68502	3.48699e-08	9.39114e-07	Unknown protein
Solyc04g075000.1.1	-1.68376	1.28643e-05	0.000173454	Serine/threonine-protein kinase-like protein (AHRD V3.3 *** A0A2G3CNY7_CAPCH)
Solyc03g114900.3.1	-1.68365	3.79726e-06	6.08605e-05	COBRA-like protein (AHRD V3.3 *** K4BKZ2_SOLLC)
Solyc02g083480.3.1	-1.67653	0.000157542	0.00147753	Peroxidase (AHRD V3.3 *** K4BAL6_SOLLC)
Solyc02g077030.3.1	-1.67622	5.57085e-07	1.09128e-05	Phospholipase A1-II 1 (AHRD V3.3 *** A0A2G2VBM1_CAPBA)
Solyc07g062010.1.1	-1.67434	0.000837434	0.00602516	Carbohydrate-binding X8 domain superfamily protein (AHRD V3.3 *** F4IA92_ARATH)
Solyc02g070200.3.1	-1.67425	6.45025e-11	3.27666e-09	FAD-binding Berberine family protein (AHRD V3.3 *** A0A2U1LDC6_ARTAN)
Solyc03g007080.4.1	-1.6738	3.61381e-05	0.000425226	Hydroxyproline-rich glycoprotein family protein (AHRD V3.3 *-* A0A2U1Q2A5_ARTAN)
Solyc06g082240.2.1	-1.67308	3.33743e-05	0.000397386	Laccase (AHRD V3.3 *** K4CA83_SOLLC)
Solyc05g053180.3.1	-1.67254	1.58043e-14	1.75436e-12	SsrA-binding protein (AHRD V3.3 *** Q9LUN9_ARATH)
Solyc05g051850.3.1	-1.6725	3.94574e-13	3.12384e-11	putative myo-inositol-1-phosphatase
Solyc07g044720.3.1	-1.67139	4.78808e-05	0.000539413	3-hydroxyisobutyryl-CoA hydrolase-like protein 5 (AHRD V3.3 *** A0A2G2XQ26_CAPBA)
Solyc07g006560.3.1	-1.66724	0.000251125	0.00218887	Hypersensitive response assisting protein (AHRD V3.3 *** Q9SWC6_CAPAN)
Solyc08g008630.4.1	-1.65966	0.00337269	0.0189398	beta-carotene isomerase D27, chloroplastic (AHRD V3.3 *** A0A2I4EYC2_9ROSI)
Solyc12g005630.2.1	-1.65826	5.74737e-06	8.75671e-05	Cytochrome b6-f complex iron-sulfur subunit (AHRD V3.3 *** A0A1U8G0H9_CAPAN)
Solyc03g093280.3.1	-1.65628	1.69946e-13	1.48561e-11	Aldo/keto reductase family protein (AHRD V3.3 *** Q9FJK0_ARATH)
Solyc02g092870.2.1	-1.65422	8.55321e-15	9.91416e-13	Nucleolar-like protein (AHRD V3.3 *** F4J3H8_ARATH)
Solyc09g059470.4.1	-1.65376	1.66127e-11	9.49684e-10	hypothetical protein (AHRD V3.3 *** AT3G07210.1)
Solyc04g082000.4.1	-1.64735	7.04699e-06	0.000104264	Phospholipase D (AHRD V3.3 *** K4BVS9_SOLLC)
Solyc10g080380.1.1	-1.64652	9.86003e-06	0.000139021	Unknown protein
Solyc10g076730.1.1	-1.64618	7.21111e-10	2.93196e-08	Plant invertase/pectin methylesterase inhibitor superfamily protein (AHRD V3.3 *** A0A061E7V9_THECC)
Solyc01g097570.2.1	-1.64384	3.41802e-15	4.34607e-13	Protein SUPPRESSOR OF K(+) TRANSPORT GROWTH DEFECT 1 (AHRD V3.3 *-* A0A2G2W7B7_CAPBA)
Solyc10g011730.3.1	-1.63833	1.14094e-07	2.63654e-06	Arabinogalactan peptide (AHRD V3.3 *** A0A200Q7C1_9MAGN)
Solyc01g109040.4.1	-1.63607	4.02018e-06	6.38965e-05	Cytochrome b6-f complex subunit 7 (AHRD V3.3 *** A0A1U8DXD4_CAPAN)
Solyc12g042930.2.1	-1.63453	8.86779e-10	3.51694e-08	DUF642 domain-containing protein (AHRD V3.3 *** A0A1Q3BMB3_CEPFO)
Solyc12g044630.2.1	-1.63184	0.000418088	0.00339509	Profilin (AHRD V3.3 *** A0A1U8F126_CAPAN)
Solyc01g090440.2.1	-1.63014	8.32217e-05	0.000866927	cotton fiber protein (AHRD V3.3 *-* AT3G60380.1)
Solyc05g006010.4.1	-1.62835	0.000105388	0.00106147	Protein NRT1/ PTR FAMILY 1.2 (AHRD V3.3 *-* A0A1J3FWJ0_NOCCA)
Solyc06g009510.1.1	-1.6236	3.8505e-10	1.66564e-08	transcription factor UPBEAT1 (AHRD V3.3 *-* A0A2I4GEI3_9ROSI)
Solyc05g055190.1.1	-1.62337	0.00351855	0.0195392	leucine-rich repeat receptor protein kinase EMS1-like (AHRD V3.3 *** A0A1U8GTK7_CAPAN)
Solyc03g120040.3.1	-1.62166	6.37285e-12	4.03935e-10	DUF642 domain-containing protein (AHRD V3.3 *** A0A1Q3BMB3_CEPFO)
Solyc06g084820.2.1	-1.62088	4.44792e-10	1.89669e-08	Cytochrome P450 (AHRD V3.3 *** A0A200PMP4_9MAGN)
Solyc05g016390.4.1	-1.62021	6.75893e-07	1.29146e-05	Carbohydrate-binding X8 domain superfamily protein (AHRD V3.3 *-* F4IF51_ARATH)
Solyc09g082560.4.1	-1.61983	6.60704e-14	6.2722e-12	SUN-like protein 26
Solyc05g015320.3.1	-1.6193	4.29403e-05	0.000492557	65-kDa microtubule-associated protein 8 (AHRD V3.3 *** A0A2G2YEW9_CAPAN),Pfam:PF03999
Solyc04g055150.1.1	-1.6189	0.00716761	0.0341454	C2 calcium/lipid-binding domain, CaLB (AHRD V3.3 *-* A0A2U1PHW5_ARTAN)
Solyc12g096620.1.1	-1.61866	0.00499958	0.0258225	GDSL esterase
Solyc07g064870.3.1	-1.6182	1.02448e-13	9.38583e-12	Endoglucanase (AHRD V3.3 *** A0A2G2WGL3_CAPBA)
Solyc08g014360.2.1	-1.61793	0.00322616	0.0182586	Alcohol dehydrogenase (AHRD V3.3 *** A0A1Y1I027_KLENI)
Solyc09g150105.1.1	-1.61715	0.00359811	0.0198786	Laccase (AHRD V3.3 *** M1AHJ4_SOLTU)
Solyc02g090300.3.1	-1.61537	7.30218e-09	2.36419e-07	Geraniol 8-hydroxylase (AHRD V3.3 *** A0A1U8FQZ4_CAPAN)
Solyc06g082450.1.1	-1.61211	6.75542e-08	1.67133e-06	ovate family protein
Solyc05g007230.4.1	-1.61201	7.69889e-07	1.43831e-05	Receptor-like kinase (AHRD V3.3 *-* A0A0K9NLV5_ZOSMR)
Solyc06g074340.3.1	-1.61182	5.28177e-10	2.22067e-08	Alpha/beta-Hydrolases superfamily protein (AHRD V3.3 *** B3H6Y0_ARATH)
Solyc05g052300.4.1	-1.60916	0.00328172	0.0185331	Amino acid transporter (AHRD V3.3 *** S8C1J4_9LAMI)
Solyc12g010420.1.1	-1.60846	3.63652e-05	0.000426854	hypothetical protein (AHRD V3.3 --* AT5G11070.1)
Solyc12g005400.3.1	-1.60623	0.000796483	0.00576612	cyclic nucleotide-gated ion channel 4 (AHRD V3.3 *** A0A2I4H6P7_9ROSI)
Solyc05g054480.3.1	-1.60596	1.44002e-14	1.6156e-12	Actin (AHRD V3.3 *** A0A2G2VVS8_CAPBA)
Solyc07g008420.3.1	-1.60582	8.85321e-12	5.41242e-10	Early nodulin-like protein 1 (AHRD V3.3 *** A0A1J3GM17_NOCCA)
Solyc02g077540.4.1	-1.60452	0.00225161	0.0136766	DUF599 domain-containing protein (AHRD V3.3 *** A0A1Q3C482_CEPFO)
Solyc01g080410.3.1	-1.60228	3.33034e-06	5.3954e-05	Peptide-methionine (R)-S-oxide reductase (AHRD V3.3 *** A0A1U8FLP0_CAPAN)
Solyc11g071520.2.1	-1.60141	2.39789e-05	0.000298031	Glucan endo-1,3-beta-glucosidase 11 (AHRD V3.3 *** A0A2G3BAL0_CAPCH)
Solyc07g022830.3.1	-1.59967	3.53101e-12	2.37438e-10	EXS (AHRD V3.3 *** A0A200R094_9MAGN)
Solyc01g100000.3.1	-1.59928	1.60448e-06	2.76598e-05	F-box domain, Phloem protein 2-like protein (AHRD V3.3 *** A0A2U1MNC1_ARTAN)
Solyc07g062200.2.1	-1.59468	0.00473034	0.0246858	bHLH transcription factor 088
Solyc12g005710.3.1	-1.59358	2.35657e-21	9.69428e-19	Early nodulin-like protein 1-like (AHRD V3.3 *-* A0A2K3MXQ1_TRIPR)
Solyc09g014730.3.1	-1.59015	8.63337e-06	0.000124316	Protein kinase domain (AHRD V3.3 *** A0A200Q5X3_9MAGN)
Solyc08g007040.3.1	-1.58997	0.00272257	0.0159418	Glycine cleavage system H protein (AHRD V3.3 *** A0A2G2W3F1_CAPBA)
Solyc11g020960.2.1	-1.5855	2.23725e-09	8.06485e-08	Proteinase inhibitor type-2 (AHRD V3.3 *** A0A2G3AT14_CAPCH)
Solyc01g079270.1.1	-1.58031	3.96415e-05	0.000460509	transcription factor UPBEAT1 (AHRD V3.3 *** XP_022860772.1)
Solyc07g009070.4.1	-1.57775	2.55459e-16	3.91207e-14	defensin-like protein 19 (AHRD V3.3 *** A0A1S4AH79_TOBAC)
Solyc11g072800.3.1	-1.57498	6.18294e-06	9.35242e-05	Respiratory burst oxidase (AHRD V3.3 *** A0A2U1P7U6_ARTAN)
Solyc10g055197.1.1	-1.57344	6.21044e-12	3.94833e-10	Dirigent protein (AHRD V3.3 *** M1BZH9_SOLTU)
Solyc09g025230.4.1	-1.57227	1.06881e-05	0.000148698	patellin-4-like (AHRD V3.3 *** A0A2I4F6C8_9ROSI)
Solyc11g007030.3.1	-1.57197	8.2335e-10	3.29026e-08	Alpha/beta-Hydrolases superfamily protein (AHRD V3.3 *** A0A2U1MAY4_ARTAN)
Solyc08g069170.3.1	-1.57169	8.41979e-13	6.40026e-11	Receptor protein kinase, putative (AHRD V3.3 *** B9RHT1_RICCO)
Solyc07g047740.3.1	-1.56917	3.86017e-17	6.74887e-15	TOMTPX2A peroxidase
Solyc06g048790.1.1	-1.5688	1.68031e-05	0.000218827	Protein PLANT CADMIUM RESISTANCE like (AHRD V3.3 *** A0A2R6RR66_ACTCH)
Solyc05g010800.3.1	-1.56771	1.3838e-05	0.000185036	3-methyladenine DNA glycosylase (AHRD V3.3 *** A0A1Y0KLG3_9PSED)
Solyc11g067310.3.1	-1.56259	0.008294	0.0382669	ABC transporter B family member 12 (AHRD V3.3 *** A0A2G3A4I9_CAPAN)
Solyc08g007240.4.1	-1.56104	4.43036e-08	1.1461e-06	Nudix hydrolase 8 (AHRD V3.3 *** A0A1U8EVF7_CAPAN)
Solyc06g051130.1.1	-1.56005	0.0019092	0.0119576	HXXXD-type acyl-transferase family protein (AHRD V3.3 *** Q9XEF2_ARATH)
Solyc11g005350.2.1	-1.55863	4.91928e-07	9.75487e-06	WAT1-related protein (AHRD V3.3 *** K4D4E8_SOLLC)
Solyc01g068140.4.1	-1.55838	3.87323e-14	3.96392e-12	HXXXD-type acyl-transferase family protein (AHRD V3.3 *** A0A2U1PGW7_ARTAN)
Solyc02g071010.1.1	-1.55832	0.000889311	0.00632037	Chlorophyll a-b binding protein, chloroplastic (AHRD V3.3 *** A0A2G3A7J8_CAPAN)
Solyc09g009610.3.1	-1.55774	7.42979e-06	0.000109234	Purple acid phosphatase (AHRD V3.3 *** A0A2G3BIG2_CAPCH)
Solyc08g080430.2.1	-1.55725	0.0011518	0.00785081	Cytochrome P450 (AHRD V3.3 *** A0A200QUP8_9MAGN)
Solyc07g056310.3.1	-1.55325	0.000240699	0.00210938	Carbohydrate-binding X8 domain superfamily protein (AHRD V3.3 *-* Q1G3P4_ARATH)
Solyc01g079370.4.1	-1.55315	1.87478e-08	5.43271e-07	Transcription factor GRAS (AHRD V3.3 *** A0A200PWC4_9MAGN)
Solyc09g065570.4.1	-1.55252	0.000128075	0.0012463	Serine/threonine-protein kinase Nek2 (AHRD V3.3 *** A0A1U8G1X8_CAPAN)
Solyc09g014560.2.1	-1.55083	0.000683514	0.00505624	MLP-like protein 28 (AHRD V3.3 *-* A8MR61_ARATH)
Solyc01g087740.1.1	-1.54882	6.66057e-12	4.15889e-10	Subtilisin-like protease (AHRD V3.3 *** O82777_SOLLC)
Solyc09g063130.3.1	-1.54852	2.719e-15	3.61042e-13	Photosystem I reaction center subunit IV (AHRD V3.3 *-* A0A2P6U4S6_CHLSO)
Solyc05g010460.4.1	-1.54808	3.14347e-06	5.1363e-05	hypothetical protein (DUF1262) (AHRD V3.3 *** AT1G13490.2)
Solyc12g006050.2.1	-1.54737	0.000292455	0.00249521	Protein NRT1/ PTR FAMILY 6.4 (AHRD V3.3 *** A0A2G2X304_CAPBA)
Solyc08g078550.1.1	-1.54295	5.72912e-06	8.73525e-05	Metalloendoproteinase 1-like protein (AHRD V3.3 *** A0A2K3NXA7_TRIPR)
Solyc06g050530.3.1	-1.5393	8.15004e-05	0.000852382	Laccase (AHRD V3.3 *** K4C5J7_SOLLC)
Solyc12g088000.2.1	-1.53802	4.75882e-05	0.000537353	Tyrosine aminotransferase (AHRD V3.3 *** A0A2G2VLJ4_CAPBA)
Solyc10g007690.3.1	-1.53607	1.0042e-06	1.82408e-05	Chlorophyll a-b binding protein, chloroplastic (AHRD V3.3 *** A0A0F7H033_EROTE)
Solyc03g093290.2.1	-1.53543	0.000536453	0.00415612	Aldo/keto reductase family protein (AHRD V3.3 *** Q9FJK0_ARATH)
Solyc01g006810.4.1	-1.53454	9.54529e-06	0.000135037	E3 ubiquitin-protein ligase RHF2A-like (AHRD V3.3 *** A0A2I4GY35_9ROSI)
Solyc12g005370.2.1	-1.53449	2.18797e-18	4.93588e-16	Peroxidase (AHRD V3.3 *** K4DB75_SOLLC)
Solyc03g115900.4.1	-1.53259	4.41886e-06	6.92883e-05	Chlorophyll a-b binding protein, chloroplastic (AHRD V3.3 *** A0A1U8G3I4_CAPAN)
Solyc08g081535.1.1	-1.53155	1.71499e-21	7.65544e-19	1-aminocyclopropane-1-carboxylate synthase (AHRD V3.3 *** B2NIX1_CAPCH)
Solyc09g008910.2.1	-1.52927	1.46022e-05	0.000194018	Cytochrome P450 (AHRD V3.3 *** Q8H0I8_PETHY)
Solyc09g098160.3.1	-1.52591	4.53113e-21	1.66777e-18	pirin
Solyc04g076190.1.1	-1.52554	6.79644e-11	3.43589e-09	Eukaryotic aspartyl protease family protein (AHRD V3.3 *** F4K5B9_ARATH)
Solyc02g087870.3.1	-1.52428	1.06546e-10	5.125e-09	ABC transporter (AHRD V3.3 *** A0A200QEZ6_9MAGN)
Solyc09g082550.3.1	-1.52369	1.70122e-05	0.000221274	Sulfate transporter (AHRD V3.3 *** Q70BL1_BRAOL)
Solyc08g078950.3.1	-1.52286	3.1473e-19	8.57538e-17	NIT1
Solyc02g089730.1.1	-1.52284	1.77091e-12	1.25944e-10	Endo-1,3(4)-beta-glucanase 1 (AHRD V3.3 *** A0A1J3K097_NOCCA)
Solyc01g098960.3.1	-1.52194	1.04602e-07	2.43569e-06	Hexosyltransferase (AHRD V3.3 *** A0A2G3BUG9_CAPCH)
Solyc04g074730.1.1	-1.52053	9.6739e-22	4.41214e-19	classical arabinogalactan protein 5 (AHRD V3.3 --* XP_004237948.1)
Solyc10g083250.2.1	-1.52031	3.07566e-11	1.68479e-09	Casparian strip membrane protein 1 (AHRD V3.3 *** CASP1_TOBAC)
Solyc08g079920.2.1	-1.5194	4.53445e-14	4.53723e-12	Subtilisin-like protease (AHRD V3.3 *** Q9LWA3_SOLLC)
Solyc07g017880.4.1	-1.51641	1.51187e-13	1.33273e-11	Peroxidase (AHRD V3.3 *** K4CCK2_SOLLC)
Solyc08g078910.1.1	-1.51567	2.69338e-13	2.24235e-11	Bifunctional inhibitor/lipid-transfer protein/seed storage 2S albumin superfamily protein (AHRD V3.3 *** A0A2U1PU47_ARTAN)
Solyc06g068770.3.1	-1.51017	1.09296e-20	3.82172e-18	DB279
Solyc07g065927.1.1	-1.50945	2.70797e-05	0.000331465	Heavy metal-associated isoprenylated plant protein 47 (AHRD V3.3 *-* A0A314Z745_PRUYE)
Solyc02g090430.3.1	-1.50923	0.000218332	0.00195168	MAP kinase kinase kinase 20
Solyc01g010180.3.1	-1.50834	5.17272e-10	2.18357e-08	Unknown protein
Solyc07g009090.4.1	-1.50802	1.64748e-18	3.88362e-16	defensin-like protein 19 (AHRD V3.3 *** A0A1S4AH79_TOBAC)
Solyc11g065990.2.1	-1.50635	1.55783e-06	2.69442e-05	Actin (AHRD V3.3 *** A0A2G2VVS8_CAPBA)
Solyc05g052280.3.1	-1.50598	0.000162525	0.00151883	Peroxidase (AHRD V3.3 *** K4C1Q9_SOLLC)
Solyc01g091050.4.1	-1.50563	0.00813453	0.0377405	Pectinesterase (AHRD V3.3 *** A0A2G2XP44_CAPBA)
Solyc04g078040.3.1	-1.50266	5.35428e-08	1.35996e-06	Peroxisomal membrane 22 kDa (Mpv17/PMP22) family protein (AHRD V3.3 *** A0A2U1NNX3_ARTAN)
Solyc09g065910.3.1	-1.50257	1.33213e-12	9.70421e-11	Photosystem II reaction center W protein, chloroplastic (AHRD V3.3 *-* A0A1U8H8Q3_CAPAN)
Solyc12g057020.2.1	-1.50177	1.24578e-07	2.85645e-06	Carbohydrate esterase, putative (DUF303) (AHRD V3.3 *** Q0WNN6_ARATH)
Solyc07g017405.1.1	-1.50141	2.56917e-09	9.07427e-08	heavy metal-associated isoprenylated plant protein 43-like (AHRD V3.3 --* XP_020097804.1)
Solyc06g075450.2.1	-1.49977	0.00176054	0.011159	Protein NRT1/ PTR FAMILY 2.7 (AHRD V3.3 *** A0A2G3CB24_CAPCH)
Solyc08g076220.3.1	-1.499	5.67994e-05	0.000628548	Phosphoribulokinase (AHRD V3.3 *** A0A1U8GUA7_CAPAN)
Solyc03g116580.4.1	-1.49824	1.68326e-12	1.20118e-10	Pectin lyase-like superfamily protein (AHRD V3.3 *** A0A2U1PQE9_ARTAN)
Solyc05g014000.4.1	-1.49584	1.77375e-05	0.000229004	Pectate lyase (AHRD V3.3 *** A0A2G3B8Z4_CAPCH)
Solyc04g014470.3.1	-1.49583	5.37235e-11	2.79682e-09	R2R3MYB transcription factor 20
Solyc07g009020.2.1	-1.4921	8.73936e-13	6.60231e-11	defensin-like protein 19 (AHRD V3.3 *** A0A1S4AH79_TOBAC)
Solyc08g008340.4.1	-1.49044	9.48131e-11	4.64761e-09	Nucleoside diphosphate kinase (AHRD V3.3 *** A0A2G3AP96_CAPAN)
Solyc12g005670.2.1	-1.48987	1.57233e-22	8.68089e-20	HAK5
Solyc02g072170.3.1	-1.48815	0.0015851	0.0102073	hypothetical protein (AHRD V3.3 --* AT4G15140.1)
Solyc11g012250.1.1	-1.48515	4.94063e-07	9.78795e-06	MBOAT (Membrane bound O-acyl transferase) family protein (AHRD V3.3 *** A0A2U1LYZ9_ARTAN)
Solyc12g055960.1.1	-1.48313	0.00697627	0.0334084	Core-2/I-branching beta-16-N-acetylglucosaminyltransferase family protein (AHRD V3.3 *** B6ST68_MAIZE)
Solyc06g074800.1.1	-1.48271	7.45363e-07	1.39872e-05	Zinc finger protein (AHRD V3.3 *** A0A200R9U1_9MAGN)
Solyc02g070755.1.1	-1.48165	1.46955e-07	3.2834e-06	Unknown protein
Solyc01g105030.3.1	-1.4806	1.72282e-13	1.49358e-11	Chlorophyll a-b binding protein, chloroplastic (AHRD V3.3 *** A0A2G3AWK5_CAPCH)
Solyc09g009590.1.1	-1.47863	6.28889e-15	7.58281e-13	Zinc finger A20 and AN1 domain stress-associated protein (AHRD V3.3 *** A0A2K3KXY3_TRIPR)
Solyc03g082790.4.1	-1.47786	0.00634782	0.0311162	extensin-like 54
Solyc03g098070.3.1	-1.4771	0.00958499	0.0429411	C2H2-like zinc finger protein (AHRD V3.3 *** A0A2U1L7F0_ARTAN)
Solyc07g066350.1.1	-1.47593	0.000581366	0.00444014	serine/arginine repetitive matrix-like protein (AHRD V3.3 *** AT1G56020.1)
Solyc03g098430.4.1	-1.47587	4.04941e-11	2.17837e-09	Xyloglucan endotransglucosylase/hydrolase (AHRD V3.3 *** A0A1U8G995_CAPAN)
Solyc07g065160.4.1	-1.47488	0.0102986	0.04543	Pirin-like protein (AHRD V3.3 *** A0A2G3C2M5_CAPCH)
Solyc01g094610.4.1	-1.47481	8.7046e-07	1.60618e-05	Rop guanine nucleotide exchange factor 2 (AHRD V3.3 *** A0A2G3BT06_CAPCH)
Solyc09g082570.3.1	-1.47268	3.40664e-13	2.7489e-11	Neurogenic locus notch-like protein (AHRD V3.3 *** F4JIF2_ARATH)
Solyc06g070910.3.1	-1.47116	4.52609e-09	1.52664e-07	Unknown protein
Solyc06g064990.2.1	-1.4707	2.07423e-05	0.000263582	GDSL esterase/lipase 5-like (AHRD V3.3 *** A0A1U8FAQ0_CAPAN)
Solyc08g076640.1.1	-1.47032	2.52901e-05	0.000311742	Eukaryotic aspartyl protease family protein (AHRD V3.3 *** A0A2U1KXX4_ARTAN)
Solyc02g062690.3.1	-1.46653	0.000224567	0.0019913	bHLH transcription factor 012
Solyc03g078650.4.1	-1.46617	8.44165e-11	4.17703e-09	DUF620 domain-containing protein (AHRD V3.3 *** A0A1Q3AM34_CEPFO)
Solyc05g055220.1.1	-1.46528	0.000130858	0.00126867	ovate family protein 10
Solyc11g008820.2.1	-1.46525	7.4013e-19	1.89365e-16	Endoglucanase (AHRD V3.3 *** A0A2G2VEA7_CAPBA)
Solyc02g081890.4.1	-1.46442	0.00323099	0.018281	Core-2/I-branching beta-16-N-acetylglucosaminyltransferase family protein (AHRD V3.3 *** B6ST68_MAIZE)
Solyc09g005260.4.1	-1.45834	8.60615e-06	0.000124009	Vacuolar cation/proton exchanger (AHRD V3.3 *** A0A2G3BK94_CAPCH)
Solyc06g005070.3.1	-1.4577	7.06192e-05	0.000755528	Major facilitator superfamily protein (AHRD V3.3 *** A0A1P8AQH5_ARATH)
Solyc07g052240.3.1	-1.45727	8.00085e-09	2.55881e-07	L-ascorbate oxidase-like protein (AHRD V3.3 *** A0A2G2V9R9_CAPBA)
Solyc06g033860.2.1	-1.45613	9.48841e-07	1.73554e-05	Glutamate dehydrogenase (AHRD V3.3 *** A0A1U8GQ51_CAPAN)
Solyc01g090800.3.1	-1.4547	7.21472e-07	1.36488e-05	cyclinU2_1
Solyc01g096860.3.1	-1.45308	0.00273301	0.0159895	AP2-like ethylene-responsive transcription factor (AHRD V3.3 *-* A0A2G2YVB3_CAPAN)
Solyc12g005430.1.1	-1.45288	0.000139414	0.00133314	HXXXD-type acyl-transferase family protein (AHRD V3.3 *** F4JBC7_ARATH)
Solyc10g080510.1.1	-1.45229	6.2706e-15	7.58281e-13	Lectin receptor kinase (AHRD V3.3 *** A0A2K3LCW2_TRIPR)
Solyc02g063480.2.1	-1.44904	1.86165e-06	3.16767e-05	Eukaryotic aspartyl protease family protein (AHRD V3.3 *** A0A2U1ML86_ARTAN)
Solyc01g090410.3.1	-1.44805	0.00601163	0.0297813	Alpha/beta-Hydrolases superfamily protein (AHRD V3.3 *** A0A2U1KLU2_ARTAN)
Solyc01g080990.3.1	-1.44682	0.00014526	0.00137919	S-adenosyl-L-methionine-dependent methyltransferases superfamily protein (AHRD V3.3 *** A0A2U1LGR9_ARTAN)
Solyc02g036480.1.1	-1.44635	4.04525e-06	6.41562e-05	Late embryogenesis abundant (LEA) hydroxyproline-rich glycoprotein family (AHRD V3.3 *** Q9SLI0_ARATH)
Solyc05g025600.1.1	-1.44567	1.13964e-05	0.000156682	Photosystem II reaction center X protein (AHRD V3.3 *** A0A2G3CGE7_CAPCH)
Solyc10g085620.2.1	-1.44541	0.0105859	0.0463864	Myb family transcription factor APL (AHRD V3.3 *** A0A1U8E9S3_CAPAN)
Solyc05g054820.1.1	-1.44483	1.45847e-06	2.53931e-05	Exocyst subunit Exo70 family protein (AHRD V3.3 *** A0A1S6GXC2_TOBAC)
Solyc02g092120.3.1	-1.44428	0.00118635	0.00804028	phytosulfokines-like (AHRD V3.3 *** A0A2I4HMI7_9ROSI)
Solyc03g033710.3.1	-1.4432	2.67316e-10	1.19744e-08	Peroxidase (AHRD V3.3 *** K4BFP3_SOLLC)
Solyc06g074230.3.1	-1.44199	1.77914e-25	1.69665e-22	Casparian strip membrane protein 1 (AHRD V3.3 *** CASP1_HELAN)
Solyc02g088090.1.1	-1.44194	5.75732e-11	2.98243e-09	Calmodulin-like protein 45 (AHRD V3.3 *** A0A2P0QD45_CAMSI)
Solyc07g053540.1.1	-1.44023	9.55767e-24	6.26625e-21	Fasciclin-like arabinogalactan protein 9 (AHRD V3.3 *** A0A1U8HBV4_CAPAN)
Solyc05g013760.4.1	-1.43938	0.00587058	0.029304	Proline-rich receptor-like kinase (AHRD V3.3 *-* A0A1I9LPJ0_ARATH)
Solyc03g122320.1.1	-1.43641	0.000453768	0.00361842	Unknown protein
Solyc02g071220.3.1	-1.43146	3.94784e-11	2.13468e-09	type-A response regulator2
Solyc04g010270.1.1	-1.43054	2.23004e-18	4.97727e-16	Dirigent protein (AHRD V3.3 *** K4BPI1_SOLLC)
Solyc10g083340.3.1	-1.42965	0.00106421	0.00734442	Myb family transcription factor APL (AHRD V3.3 *** A0A2G2YMX5_CAPAN)
Solyc09g010200.4.1	-1.42726	4.55441e-18	9.3678e-16	Casparian strip membrane protein 1 (AHRD V3.3 *** CASP1_TOBAC)
Solyc03g111880.3.1	-1.4246	1.50532e-12	1.08156e-10	Cytochrome (AHRD V3.3 *** A0A2G2X8H9_CAPBA)
Solyc02g086840.3.1	-1.42225	6.50567e-09	2.13598e-07	Tetratricopeptide repeat (TPR)-like superfamily protein (AHRD V3.3 *** A0A2U1LHI7_ARTAN)
Solyc08g078670.2.1	-1.42076	7.50204e-15	8.82617e-13	Eukaryotic aspartyl protease family protein (AHRD V3.3 *** A0A061G3B8_THECC)
Solyc06g068700.4.1	-1.41983	0.000466203	0.00369371	Calreticulin/calnexin (AHRD V3.3 *** A0A200R3N5_9MAGN)
Solyc02g078650.4.1	-1.41916	2.24872e-12	1.55704e-10	Polyphenol oxidase, chloroplastic (AHRD V3.3 *** A0A2G3D678_CAPCH)
Solyc03g114420.1.1	-1.41698	6.79956e-10	2.77594e-08	Calmodulin (AHRD V3.3 *** B6SJJ2_MAIZE)
Solyc09g089610.3.1	-1.41571	0.00834353	0.0384128	ethylene receptor-like protein (ETR6)
Solyc05g051920.3.1	-1.41403	0.000224444	0.0019913	Major facilitator superfamily (AHRD V3.3 *** A0A200QUR2_9MAGN)
Solyc08g082990.3.1	-1.41327	2.93569e-14	3.11065e-12	Oligopeptide transporter (AHRD V3.3 *** A0A200RD47_9MAGN)
Solyc02g014830.4.1	-1.41261	3.53914e-18	7.4201e-16	Carboxypeptidase (AHRD V3.3 *** A0A2G2XBM8_CAPBA)
Solyc09g075600.3.1	-1.41234	9.31171e-09	2.93333e-07	GATA transcription factor-like protein (AHRD V3.3 *-* AT1G02700.1)
Solyc04g063390.2.1	-1.4116	0.0103024	0.0454361	Chaperone protein dnaJ 10 (AHRD V3.3 *** A0A2G2ZPA7_CAPAN)
Solyc11g010760.1.1	-1.40685	0.00397677	0.0215755	Glycosyltransferase (AHRD V3.3 *** A0A2U1PXH3_ARTAN)
Solyc02g087840.3.1	-1.40656	9.18745e-11	4.52471e-09	Leucine zipper, homeobox-associated, Homeodomain-like protein (AHRD V3.3 *** A0A2U1PPL6_ARTAN)
Solyc10g007510.2.1	-1.40622	0.00260646	0.0153995	Carbohydrate-binding X8 domain superfamily protein (AHRD V3.3 *** F4IA92_ARATH)
Solyc03g059080.3.1	-1.40226	7.8256e-05	0.000822139	Protein kinase superfamily protein (AHRD V3.3 *** A0A1I9LM53_ARATH)
Solyc08g079200.1.1	-1.39992	1.30925e-08	3.94655e-07	Bifunctional inhibitor/lipid-transfer protein/seed storage 2S albumin superfamily protein (AHRD V3.3 *** A0A2U1PU47_ARTAN)
Solyc08g044510.4.1	-1.39885	4.54155e-14	4.53723e-12	Beta-glucosidase (AHRD V3.3 *** F8R893_9MAGN)
Solyc09g010480.1.1	-1.39882	0.00296885	0.0171352	Forkhead box protein G1 (AHRD V3.3 *** F4IQY1_ARATH)
Solyc04g079700.3.1	-1.39504	0.000326621	0.0027421	Transducin/WD40 repeat-like superfamily protein (AHRD V3.3 *** A0A2U1PM75_ARTAN)
Solyc09g010230.2.1	-1.39311	0.00210356	0.0129345	B3 domain-containing protein (AHRD V3.3 *** A0A2G2VWZ0_CAPBA)
Solyc11g066330.2.1	-1.39303	0.000669035	0.00496687	Major facilitator superfamily (AHRD V3.3 *** A0A2U1Q7R9_ARTAN)
Solyc07g064240.4.1	-1.39174	2.67138e-18	5.66117e-16	Early nodulin-like protein 2-like (AHRD V3.3 *** A0A2K3LF88_TRIPR)
Solyc06g010010.3.1	-1.39069	0.00228406	0.0138456	MLO-like protein (AHRD V3.3 *** K4C428_SOLLC)
Solyc06g054270.3.1	-1.38957	0.00713691	0.0340533	Sugar transporter protein 11
Solyc02g072520.3.1	-1.38919	9.58626e-05	0.00097489	Concanavalin A-like lectin/glucanase, subgroup (AHRD V3.3 *** A0A2U1KZV6_ARTAN)
Solyc04g079030.2.1	-1.38418	9.19662e-07	1.68658e-05	Glycosyltransferase (AHRD V3.3 *** V4NB36_EUTSA)
Solyc03g005320.3.1	-1.38067	0.00594398	0.0295369	3-ketoacyl-CoA synthase (AHRD V3.3 *** A0A2G2WWC0_CAPBA)
Solyc07g009080.4.1	-1.37646	5.86262e-18	1.19415e-15	defensin-like protein 19 (AHRD V3.3 *** A0A2G2ZPK5_CAPAN)
Solyc03g083840.3.1	-1.37633	1.99981e-09	7.30941e-08	Pectinesterase (AHRD V3.3 *** A0A1U8G949_CAPAN)
Solyc04g081300.4.1	-1.376	2.97312e-10	1.32153e-08	Endoglucanase (AHRD V3.3 *** A0A2G3CQE2_CAPCH)
Solyc03g119260.4.1	-1.37328	0.000314912	0.0026587	Core-2 i-branching beta-n-acetylglucosaminyltransferase family protein (AHRD V3.3 *** A0A2K3MN76_TRIPR)
Solyc06g083580.4.1	-1.37045	0.00390685	0.0212511	Pectate lyase (AHRD V3.3 *** A0A2G3CC63_CAPCH)
Solyc06g009610.1.1	-1.36885	0.000341379	0.00284438	Transcription factor GRAS (AHRD V3.3 *** A0A200PWC4_9MAGN)
Solyc07g043670.1.1	-1.36855	2.37707e-12	1.63512e-10	HXXXD-type acyl-transferase family protein (AHRD V3.3 *** A0A2U1NYH9_ARTAN)
Solyc09g011750.3.1	-1.36725	1.97873e-10	9.12389e-09	Protein kinase domain (AHRD V3.3 *** A0A200R4T5_9MAGN)
Solyc06g065690.3.1	-1.366	0.00419863	0.0225538	Serine/threonine protein phosphatase 2A regulatory subunit (AHRD V3.3 *** A0A2G2WKL6_CAPBA)
Solyc12g005250.2.1	-1.365	0.000655385	0.00488446	Kinesin-like protein (AHRD V3.3 *** A0A2G2X2E7_CAPBA)
Solyc05g055730.4.1	-1.36422	8.1745e-06	0.00011844	Methylenetetrahydrofolate reductase (AHRD V3.3 *** A0A2G3CIX4_CAPCH)
Solyc01g109320.4.1	-1.36355	3.97108e-11	2.14173e-09	Protein DETOXIFICATION (AHRD V3.3 *** A0A200R7E8_9MAGN)
Solyc09g074500.3.1	-1.36112	2.06073e-08	5.91439e-07	Unknown protein
Solyc10g044880.1.1	-1.36045	7.43515e-10	3.01138e-08	transmembrane protein (AHRD V3.3 *** AT5G19875.1)
Solyc03g080060.1.1	-1.35967	0.0116352	0.049787	L-type lectin-domain containing receptor kinase VIII.2-like (AHRD V3.3 *** A0A2I4F917_9ROSI)
Solyc01g008650.3.1	-1.35764	1.23462e-08	3.75942e-07	Cytochrome (AHRD V3.3 *** A0A1U8F0H8_CAPAN)
Solyc05g041140.4.1	-1.35737	3.01097e-06	4.93902e-05	Bifunctional inhibitor/plant lipid transfer protein/seed storage helical domain-containing protein (AHRD V3.3 *** A0A103YIU0_CYNCS)
Solyc07g043130.3.1	-1.35706	5.0337e-16	7.28325e-14	Phototropic-responsive NPH3 family protein (AHRD V3.3 *** A0A2U1NE60_ARTAN)
Solyc10g055200.1.1	-1.35698	3.44125e-12	2.32146e-10	Dirigent protein (AHRD V3.3 *** K4D1B3_SOLLC)
Solyc12g011023.1.1	-1.35672	1.06709e-06	1.92002e-05	Xyloglucan endotransglucosylase/hydrolase (AHRD V3.3 *** Q6RHX7_SOLLC)
Solyc09g091600.4.1	-1.35503	0.00163758	0.0105001	Protein SULFUR DEFICIENCY-INDUCED 1 (AHRD V3.3 *** A0A2G2ZTV9_CAPAN)
Solyc05g012900.4.1	-1.35471	0.0016782	0.0107122	JJH-R-like protein
Solyc03g080030.4.1	-1.35274	1.01257e-08	3.15034e-07	major latex allergen Hev b 5-like (AHRD V3.3 *-* XP_004235040.1)
Solyc02g082120.3.1	-1.35191	2.97803e-05	0.000359902	DNA-3-methyladenine glycosylase I (AHRD V3.3 *** B6TPB7_MAIZE)
Solyc05g050430.2.1	-1.35046	0.000527401	0.00409507	Plant resistance protein (AHRD V3.3 *** O81136_SOLLC)
Solyc03g096030.3.1	-1.34967	2.77136e-24	1.9381e-21	Protein trichome birefringence-like 28 (AHRD V3.3 *** A0A1J3CSC5_NOCCA)
Solyc04g051680.4.1	-1.34864	3.61358e-05	0.000425226	Ras GTPase (AHRD V3.3 *** K2SFN1_MACPH)
Solyc03g113720.3.1	-1.34238	4.26747e-07	8.61708e-06	Two-component response regulator ARR3 (AHRD V3.3 *** A0A2G2Y6S6_CAPAN)
Solyc05g056020.3.1	-1.34061	1.0176e-15	1.41385e-13	V-type proton ATPase subunit G (AHRD V3.3 *** A0A1U8GRL1_CAPAN)
Solyc01g090760.4.1	-1.3405	9.2985e-12	5.62375e-10	GATA transcription factor (AHRD V3.3 *** K4AZ17_SOLLC)
Solyc05g050790.3.1	-1.34039	2.18753e-07	4.71678e-06	Ethylene-responsive transcription factor 1 (AHRD V3.3 *** A0A2G2WT19_CAPBA)
Solyc02g091800.4.1	-1.33818	0.000132279	0.00127915	Basic helix-loop-helix (BHLH) DNA-binding superfamily protein (AHRD V3.3 *-* A0A2U1Q8Y8_ARTAN)
Solyc04g078195.1.1	-1.33544	1.0747e-07	2.4914e-06	Gibberellin-regulated protein (AHRD V3.3 *** K0E174_POPTO)
Solyc08g076870.1.1	-1.33469	0.00195074	0.0121588	DUF740 domain-containing protein (AHRD V3.3 *** A0A1Q3BKH7_CEPFO)
Solyc02g083090.1.1	-1.33416	0.00148576	0.0096685	Heat shock protein 90-1 (AHRD V3.3 *-* A0A2G2XG09_CAPBA)
Solyc06g082950.4.1	-1.33391	0.000189726	0.00173063	Photosystem I reaction center subunit XI protein (AHRD V3.3 *** A0A2U1MVK5_ARTAN)
Solyc01g097000.3.1	-1.3325	1.85294e-05	0.000238495	Glycosyl hydrolase family protein (AHRD V3.3 *** A0A1P8B9U3_ARATH)
Solyc01g091690.3.1	-1.33173	5.47482e-17	9.4927e-15	S-adenosyl-L-methionine-dependent methyltransferases superfamily protein (AHRD V3.3 *** A0A2U1NM08_ARTAN)
Solyc11g007410.3.1	-1.33145	0.000568176	0.00435329	Receptor-like protein kinase (AHRD V3.3 *** A0A2K3PPP5_TRIPR)
Solyc03g083660.1.1	-1.33092	0.0114321	0.0491286	Plant invertase/pectin methylesterase inhibitor superfamily protein (AHRD V3.3 *** A0A2U1KPL8_ARTAN)
Solyc04g017720.3.1	-1.32953	9.35662e-08	2.20564e-06	Gibberellin regulated protein (AHRD V3.3 *** A0A2U1PE48_ARTAN)
Solyc03g093610.1.1	-1.32904	3.50792e-08	9.4354e-07	ethylene response factor A.2
Solyc08g080650.3.1	-1.32587	1.50343e-20	5.08741e-18	PATHOGENESIS RELATED PROTEIN P23
Solyc02g087800.3.1	-1.32256	8.17458e-05	0.000854523	Aldose 1-epimerase (AHRD V3.3 *** A0A1U8FRP0_CAPAN)
Solyc07g009100.3.1	-1.32255	9.2782e-14	8.57518e-12	defensin-like protein 19 (AHRD V3.3 *** A0A1S4AH79_TOBAC)
Solyc04g078520.3.1	-1.32153	0.00756354	0.0355712	Transcription factor MYC/MYB domain-containing protein (AHRD V3.3 *** A0A2U1MUV3_ARTAN)
Solyc06g061023.1.1	-1.32063	2.75507e-06	4.56206e-05	Cytochrome (AHRD V3.3 *** A0A2G3C7L0_CAPCH)
Solyc07g006570.4.1	-1.32026	0.00155193	0.010043	S-like ribonuclease (AHRD V3.3 *** Q9FQL6_PRUDU)
Solyc11g019910.1.1	-1.31867	5.72904e-13	4.43525e-11	Plant invertase/pectin methylesterase inhibitor superfamily protein (AHRD V3.3 *** A0A2U1KPL8_ARTAN)
Solyc03g070440.4.1	-1.31762	1.89961e-06	3.22575e-05	COBRA-like protein (AHRD V3.3 *** K4BHH3_SOLLC)
Solyc11g006040.2.1	-1.31745	8.32685e-07	1.54599e-05	Receptor protein kinase (AHRD V3.3 *** A0A2R6RJ70_ACTCH)
Solyc04g005720.3.1	-1.31714	5.11669e-11	2.68371e-09	Caleosin (AHRD V3.3 *** A0A200QL80_9MAGN)
Solyc10g024360.2.1	-1.31671	0.000127835	0.00124454	Potassium channel AKT2 (AHRD V3.3 *** A0A1U8F4T5_CAPAN)
Solyc08g081780.1.1	-1.31657	2.48575e-16	3.86305e-14	Dirigent protein (AHRD V3.3 *** K4CPH4_SOLLC)
Solyc06g073260.3.1	-1.31571	1.21633e-09	4.68232e-08	Chloroplast stem-loop binding protein of 41 kDa b, chloroplastic (AHRD V3.3 *** A0A2G3CAL3_CAPCH)
Solyc07g061890.1.1	-1.31438	6.82863e-05	0.000735068	Unknown protein
Solyc02g069490.4.1	-1.3142	1.46007e-11	8.43864e-10	Delta(24)-sterol reductase (AHRD V3.3 *** A0A2G2XDD5_CAPBA)
Solyc02g065170.3.1	-1.31289	6.51909e-13	5.02832e-11	L-ascorbate oxidase-like protein (AHRD V3.3 *** A0A2G3D2Z5_CAPCH)
Solyc03g118710.3.1	-1.31173	1.19253e-11	7.02791e-10	Calcium-dependent lipid-binding (CaLB domain) family protein (AHRD V3.3 *** A0A2U1LMA8_ARTAN)
Solyc01g111900.4.1	-1.31146	0.00542657	0.027427	O-methyltransferase (AHRD V3.3 *** A0A2S1PVB6_CAMAC)
Solyc06g060340.3.1	-1.31088	0.000162479	0.00151883	Photosystem II 22 kDa protein, chloroplastic (AHRD V3.3 *** A0A1U8GV91_CAPAN)
Solyc11g012580.2.1	-1.30956	2.77913e-08	7.71245e-07	Carbohydrate-binding X8 domain superfamily protein (AHRD V3.3 *** F4IFD7_ARATH)
Solyc07g005840.2.1	-1.30944	1.44571e-06	2.52338e-05	Cellulose synthase (AHRD V3.3 *** K4CB55_SOLLC)
Solyc03g025210.3.1	-1.30689	2.86964e-05	0.000348409	Protein DETOXIFICATION (AHRD V3.3 *** A0A328E0F4_9ASTE)
Solyc02g077430.4.1	-1.30622	0.00106498	0.00734672	Phospholipase A1-II 1 (AHRD V3.3 *** A0A2G3D5J3_CAPCH)
Solyc08g074682.1.1	-1.30558	1.09351e-05	0.000151732	Polyphenol oxidase (AHRD V3.3 *** Q41427_SOLTU)
Solyc02g079440.3.1	-1.30428	5.47991e-10	2.29478e-08	FAD-binding Berberine family protein (AHRD V3.3 *** A0A2U1MQE5_ARTAN)
Solyc02g087970.1.1	-1.3029	0.000257182	0.0022287	Mini zinc finger protein (AHRD V3.3 *** A0ZXL1_SOLLC)
Solyc04g054195.1.1	-1.30173	0.00240955	0.0144271	Unknown protein
Solyc09g091210.4.1	-1.30138	4.76248e-29	8.32641e-26	Dirigent protein (AHRD V3.3 *** K4CWE7_SOLLC)
Solyc06g066065.1.1	-1.30096	0.00263473	0.0155272	Unknown protein
Solyc01g096280.2.1	-1.29917	6.70005e-05	0.000723826	Cytochrome P450 (AHRD V3.3 *** A0A200Q2S1_9MAGN)
Solyc12g006630.2.1	-1.29877	0.000527917	0.00409739	Dynein light chain (AHRD V3.3 *** A0A2G2YUH7_CAPAN)
Solyc02g076890.1.1	-1.29515	1.9938e-05	0.000254131	DUF538 family protein (AHRD V3.3 *** B6T6F5_MAIZE)
Solyc02g093310.3.1	-1.29384	5.0445e-12	3.29852e-10	PI-PLC X domain-containing protein (AHRD V3.3 *** A0A2G2XHF5_CAPBA)
Solyc08g067250.4.1	-1.29377	0.000194427	0.00177043	DNA cross-link repair protein SNM1 (AHRD V3.3 *** A0A2I4EZZ1_9ROSI)
Solyc01g010350.4.1	-1.29319	1.9696e-08	5.68393e-07	triose phosphate/phosphate translocator, chloroplastic-like (AHRD V3.3 *** A0A2I4H880_9ROSI)
Solyc09g074805.1.1	-1.29139	0.000175661	0.00162208	Basic helix-loop-helix (BHLH) DNA-binding superfamily protein (AHRD V3.3 *** A0A1P8BCN7_ARATH)
Solyc03g083720.1.1	-1.28996	3.24732e-05	0.00038776	Plant invertase/pectin methylesterase inhibitor superfamily protein, putative (AHRD V3.3 *** A0A061G4U8_THECC)
Solyc12g044330.2.1	-1.28956	1.21666e-11	7.15001e-10	tonoplast intrinsic protein 2.1
Solyc01g098140.4.1	-1.28642	3.95001e-07	8.05357e-06	Alpha/beta-hydrolases superfamily protein (AHRD V3.3 *** A0A2U1LX98_ARTAN)
Solyc07g055110.3.1	-1.28542	0.00685172	0.0329602	hypothetical protein (AHRD V3.3 *** AT5G12360.2)
Solyc02g087090.4.1	-1.2829	1.39967e-14	1.57877e-12	alpha-DOX2
Solyc03g034130.4.1	-1.28238	0.000182648	0.00167407	Homeobox-leucine zipper protein HOX14 (AHRD V3.3 *** A0A1U8GKM2_CAPAN)
Solyc05g052250.3.1	-1.28211	0.000267171	0.00230006	Expansin (AHRD V3.3 *** K4C1Q6_SOLLC)
Solyc02g077000.3.1	-1.28162	6.48154e-10	2.67157e-08	Phospholipase A1-II 1 (AHRD V3.3 *** A0A1U8FS88_CAPAN)
Solyc01g105590.2.1	-1.28114	0.00271904	0.01593	Acylsugar acetyltransferase (AHRD V3.3 *** K4HRD2_SOLHA)
Solyc04g008730.3.1	-1.28091	4.23006e-08	1.10229e-06	Alpha-galactosidase (AHRD V3.3 *** K4BP29_SOLLC)
Solyc10g009150.3.1	-1.27862	1.06908e-11	6.33593e-10	Organ specific protein (AHRD V3.3 *-* A0A2U1PW62_ARTAN)
Solyc05g005580.3.1	-1.27791	1.60689e-05	0.000210309	DUF936 domain-containing protein (AHRD V3.3 *** A0A1Q3CQ68_CEPFO)
Solyc03g121300.2.1	-1.27776	1.86618e-08	5.41528e-07	jacalin-related lectin 19 (AHRD V3.3 *** A0A2G2XW42_CAPAN)
Solyc01g100210.3.1	-1.27332	3.40162e-14	3.53297e-12	Hexosyltransferase (AHRD V3.3 *** A0A2G2V7U8_CAPBA)
Solyc07g042440.3.1	-1.27322	0.00705094	0.0336968	Peroxiredoxin Q (AHRD V3.3 *** D7TCA6_VITVI)
Solyc10g018320.1.1	-1.27138	0.000221811	0.001976	Plant invertase/pectin methylesterase inhibitor superfamily protein (AHRD V3.3 *** A0A061G797_THECC)
Solyc06g062690.4.1	-1.27127	0.00816084	0.0378375	Nucleosome assembly protein family (AHRD V3.3 *** A9TVZ4_PHYPA)
Solyc03g111720.3.1	-1.27061	7.66263e-08	1.86715e-06	Peptide methionine sulfoxide reductase (AHRD V3.3 *** MSRA_SOLLC)
Solyc03g071750.3.1	-1.27027	0.00238322	0.0143184	3-phosphoinositide-dependent protein kinase 1 (AHRD V3.3 *** A0A2G3CUY0_CAPCH)
Solyc05g046020.3.1	-1.27024	7.77759e-19	1.96595e-16	Peroxidase (AHRD V3.3 *** K4C0T5_SOLLC)
Solyc03g123410.1.1	-1.26983	0.000143778	0.00136801	Germin-like protein 1 (AHRD V3.3 *** A0A1U8G802_CAPAN)
Solyc05g056450.3.1	-1.26919	2.38491e-09	8.52393e-08	Eukaryotic aspartyl protease family protein (AHRD V3.3 *** A0A061DK44_THECC)
Solyc07g053590.4.1	-1.26903	0.00211916	0.0130228	NAC domain (AHRD V3.3 *** A0A200QKZ2_9MAGN)
Solyc02g071070.3.1	-1.2677	1.47571e-13	1.30635e-11	Cation/H(+) antiporter 16 (AHRD V3.3 *** A0A2G2XDT2_CAPBA)
Solyc07g005920.3.1	-1.26643	0.00864377	0.0395348	Leucine-rich receptor-like protein kinase family protein (AHRD V3.3 *** A0A061GNP8_THECC)
Solyc11g072480.2.1	-1.26638	1.7007e-11	9.66955e-10	Tetraspanin-3 (AHRD V3.3 *** A0A2G3BA66_CAPCH)
Solyc07g062210.4.1	-1.26589	0.00102436	0.00709744	Protein trichome birefringence-like 43 (AHRD V3.3 *** A0A2G2WER8_CAPBA)
Solyc04g011467.1.1	-1.2658	6.88338e-09	2.24943e-07	CASP-like protein (AHRD V3.3 *** A0A2G2XA87_CAPBA)
Solyc01g102810.3.1	-1.26501	0.000589547	0.00448755	DNA polymerase III subunit gamma/tau (AHRD V3.3 *** A0A2K3P8Q5_TRIPR)
Solyc03g120890.3.1	-1.26434	1.86478e-10	8.61742e-09	GATA transcription factor (AHRD V3.3 *** K4BMN8_SOLLC)
Solyc05g041870.2.1	-1.26173	9.66116e-11	4.71375e-09	Cytochrome b561 and DOMON domain-containing protein (AHRD V3.3 *-* A0A1Q3DJL5_CEPFO)
Solyc01g067370.3.1	-1.25972	8.43364e-07	1.56305e-05	TSB
Solyc03g033460.3.1	-1.2589	2.80929e-15	3.70685e-13	Oligopeptide transporter (AHRD V3.3 *** A0A200RD47_9MAGN)
Solyc00g500111.1.1	-1.25876	0.0035815	0.0198206	NADH dehydrogenase subunit 5 (AHRD V3.3 *-* A0A0C5B7L0_9SOLA)
Solyc01g079980.3.1	-1.25869	3.76517e-08	9.99915e-07	Eukaryotic aspartyl protease family protein (AHRD V3.3 *** A0A2U1ML86_ARTAN)
Solyc02g087120.4.1	-1.25784	0.0047048	0.0245906	Protein ALTERED XYLOGLUCAN 4-like (AHRD V3.3 *-* A0A2G3D9F7_CAPCH)
Solyc08g007230.3.1	-1.25769	0.00249628	0.0148477	Ethylene-responsive transcription factor 2 (AHRD V3.3 *** A0A2G3DC56_CAPCH)
Solyc00g019950.1.1	-1.25754	1.43227e-06	2.50826e-05	NADH dehydrogenase subunit 9 (AHRD V3.3 *** A0A290WKX8_SOLLC)
Solyc10g018330.3.1	-1.25741	4.20438e-05	0.000483596	Plant invertase/pectin methylesterase inhibitor protein (AHRD V3.3 *** A0A2K3LH23_TRIPR)
Solyc08g014560.3.1	-1.25713	0.0089174	0.0404857	Pectin lyase-like superfamily protein (AHRD V3.3 *** Q9SLM8_ARATH)
Solyc02g090680.3.1	-1.25711	0.000650217	0.00485292	Cyclin-dependent kinase inhibitor (AHRD V3.3 *** A0A2G3D8Q2_CAPCH)
Solyc09g075350.4.1	-1.25671	7.08697e-08	1.74528e-06	Pectinesterase (AHRD V3.3 *** A0A2G2W0I1_CAPBA)
Solyc08g082480.3.1	-1.25479	0.000543536	0.0041986	Phosphatidylinositol 4-kinase gamma 2 (AHRD V3.3 *** A0A2G3ADD9_CAPAN)
Solyc06g075630.4.1	-1.2543	1.58347e-26	1.74849e-23	Dirigent protein (AHRD V3.3 *** K4C9S8_SOLLC)
Solyc06g008930.3.1	-1.25394	1.34943e-07	3.05584e-06	Unknown protein
Solyc06g072840.3.1	-1.2532	0.00157814	0.0101853	hypothetical protein (AHRD V3.3 *** AT3G03150.1)
Solyc01g091110.3.1	-1.25312	3.39888e-10	1.49181e-08	Plant invertase/pectin methylesterase inhibitor (AHRD V3.3 *** G7IYJ3_MEDTR)
Solyc03g006010.3.1	-1.25203	0.000117107	0.00115619	calcium/calcium/calmodulin-dependent Serine/Threonine-kinase (AHRD V3.3 *** AT2G47010.2)
Solyc07g056170.4.1	-1.25187	1.6247e-05	0.000212375	Subtilisin-like protease (AHRD V3.3 *** A0A2G3C254_CAPCH)
Solyc06g053830.3.1	-1.25167	7.36686e-07	1.3899e-05	auxin-regulated IAA7
Solyc02g087975.1.1	-1.25091	0.00841904	0.0386841	Unknown protein
Solyc02g071690.2.1	-1.25035	1.2792e-07	2.9235e-06	GDSL esterase/lipase (AHRD V3.3 *** A0A2G3A7C5_CAPAN)
Solyc09g065430.4.1	-1.24965	2.92122e-06	4.79556e-05	Lipid transfer protein (AHRD V3.3 *-* B7FGM2_MEDTR)
Solyc12g094480.3.1	-1.24601	0.00027137	0.00233429	hypothetical protein (AHRD V3.3 *** AT1G20430.1)
Solyc05g051450.2.1	-1.24561	0.00958098	0.0429323	Unknown protein
Solyc12g089190.1.1	-1.24549	0.000175803	0.00162268	Protein RADIALIS-like 6 (AHRD V3.3 *** A0A1U8ERP9_CAPAN)
Solyc01g107980.3.1	-1.24545	5.09086e-11	2.68181e-09	RING-type E3 ubiquitin transferase (AHRD V3.3 *** A0A2G2W990_CAPBA)
Solyc09g065260.2.1	-1.24396	0.00655118	0.031903	Plastocyanin-like (AHRD V3.3 *-* A0A200QQ44_9MAGN)
Solyc09g056430.4.1	-1.24371	0.00804257	0.0373551	Serine/threonine-protein kinase OXI1 (AHRD V3.3 *** A0A2G2XS02_CAPBA)
Solyc12g097090.3.1	-1.24308	7.85218e-06	0.000114402	Dirigent protein (AHRD V3.3 *** K4DHI2_SOLLC)
Solyc10g080500.2.1	-1.243	1.28152e-13	1.14751e-11	Actin (AHRD V3.3 *** A0A2G2VVS8_CAPBA)
Solyc03g019870.4.1	-1.24269	0.000413149	0.00336747	Cytochrome P450 (AHRD V3.3 *** A0A200QAC3_9MAGN)
Solyc08g082590.3.1	-1.24031	5.27065e-06	8.10691e-05	Glutaredoxin (AHRD V3.3 *** A0A2U1KGP9_ARTAN)
Solyc02g079200.1.1	-1.24024	0.000162682	0.00151962	ARM repeat superfamily protein (AHRD V3.3 *** O64785_ARATH)
Solyc05g010080.3.1	-1.23979	3.07205e-08	8.42505e-07	lysine-rich arabinogalactan protein 19 (AHRD V3.3 *-* XP_004238980.1)
Solyc07g064050.3.1	-1.23978	0.000150699	0.00142289	Hexosyltransferase (AHRD V3.3 *** A0A2G2WF78_CAPBA)
Solyc10g005610.2.1	-1.23758	0.00378652	0.0207202	serine/arginine repetitive matrix-like protein (AHRD V3.3 *** AT1G56020.1)
Solyc04g007530.3.1	-1.23728	7.81695e-05	0.000821641	Protein DETOXIFICATION (AHRD V3.3 *** A0A328D6Y5_9ASTE)
Solyc04g009440.3.1	-1.23725	0.00373009	0.020473	NAC domain protein AY498713
Solyc02g070090.1.1	-1.23697	9.6677e-06	0.000136585	FAD-binding Berberine family protein (AHRD V3.3 *** A0A2U1KT07_ARTAN)
Solyc02g070890.3.1	-1.23623	0.000201331	0.0018238	Flagellin Sensing 2
Solyc06g065560.2.1	-1.23534	4.63079e-05	0.000524873	3-ketoacyl-CoA synthase (AHRD V3.3 *** A0A1U8GUV3_CAPAN)
Solyc09g083400.3.1	-1.2346	1.37835e-24	1.03278e-21	Protein WVD2-like 1 (AHRD V3.3 *** A0A1U8G599_CAPAN)
Solyc08g074690.3.1	-1.23235	1.41304e-07	3.17064e-06	Polyphenol oxidase e, chloroplastic (AHRD V3.3 *** A0A314KT37_NICAT)
Solyc05g052680.1.1	-1.23215	1.57597e-06	2.72131e-05	HXXXD-type acyl-transferase family protein (AHRD V3.3 *** V5PZN5_9CARY)
Solyc10g083670.3.1	-1.23187	3.34084e-05	0.000397565	Glucomannan 4-beta-mannosyltransferase 2 (AHRD V3.3 *** A0A2G3BGF1_CAPCH)
Solyc04g011910.3.1	-1.23165	0.000116178	0.00114864	sorbin/SH3 domain protein (AHRD V3.3 *** AT5G09960.1)
Solyc03g120650.4.1	-1.23058	0.000517151	0.00402741	GDP-mannose pyrophosphorylase
Solyc12g056260.1.1	-1.23021	0.00262523	0.0154798	Xyloglucan galactosyltransferase KATAMARI1-like protein (AHRD V3.3 *** A0A2K3MVQ6_TRIPR)
Solyc12g011030.3.1	-1.22854	1.26736e-08	3.84239e-07	xyloglucan endotransglucosylase-hydrolase 9
Solyc11g069840.3.1	-1.22854	0.000162888	0.00152019	DUF547 domain-containing protein/Lzipper-MIP1 domain-containing protein (AHRD V3.3 *** A0A1Q3B3P9_CEPFO)
Solyc03g046270.4.1	-1.22749	5.23086e-10	2.20368e-08	Protein trichome birefringence-like 19 (AHRD V3.3 *** A0A1U8GSF3_CAPAN)
Solyc08g075880.4.1	-1.22577	0.00371708	0.0204201	Heavy metal-associated isoprenylated plant protein (AHRD V3.3 *** A0A2R6PHP1_ACTCH)
Solyc10g008830.2.1	-1.22569	3.39979e-05	0.000403894	GDSL esterase/lipase (AHRD V3.3 *** A0A2G3BD38_CAPCH)
Solyc12g009520.2.1	-1.22467	0.000146129	0.00138536	receptor-like protein 12 (AHRD V3.3 *** A0A1S4DP57_TOBAC)
Solyc05g006420.3.1	-1.22428	5.14699e-16	7.39615e-14	Two-component response regulator ARR3 (AHRD V3.3 *** A0A2G2VM98_CAPBA)
Solyc09g072820.4.1	-1.22381	9.93861e-10	3.89742e-08	Cellulose synthase (AHRD V3.3 *** K4CUV8_SOLLC)
Solyc04g007750.4.1	-1.22354	0.000370494	0.00305781	Sn-1 protein (AHRD V3.3 *** Q42393_CAPAN)
Solyc03g114890.4.1	-1.22296	2.07887e-15	2.79582e-13	COBRA-like protein (AHRD V3.3 *** K4BKZ1_SOLLC)
Solyc08g079250.4.1	-1.22194	4.65528e-14	4.62217e-12	Bifunctional inhibitor/lipid-transfer protein/seed storage 2S albumin superfamily protein (AHRD V3.3 *** A0A2U1L4X0_ARTAN)
Solyc02g093250.3.1	-1.2215	4.18663e-21	1.56849e-18	Caffeoyl-CoA O-methyltransferase (AHRD V3.3 *** A0A1U8FPA5_CAPAN)
Solyc01g111820.2.1	-1.22121	9.68757e-08	2.27344e-06	cell wall integrity and stress response component 2-like (AHRD V3.3 *-* XP_023735371.1)
Solyc06g036100.3.1	-1.22068	1.84539e-14	2.02703e-12	Transporter arsB (AHRD V3.3 *** A0A2U1Q5Y3_ARTAN)
Solyc07g006170.4.1	-1.22048	0.000152536	0.00143634	Exostosin domain-containing protein (AHRD V3.3 *** A0A1Q3D3Q6_CEPFO)
Solyc09g098180.4.1	-1.21991	1.15144e-24	8.94709e-22	Pirin-like protein (AHRD V3.3 *** A0A2G3CR97_CAPCH)
Solyc06g007440.4.1	-1.21988	7.68481e-08	1.87039e-06	Non-specific serine/threonine protein kinase (AHRD V3.3 *** A0A2G3C4Q5_CAPCH)
Solyc02g081570.4.1	-1.2184	1.10686e-05	0.00015328	YELLOW STRIPE like 8 (AHRD V3.3 *** A0A2U1PCK1_ARTAN)
Solyc09g057580.4.1	-1.21826	1.41584e-11	8.20559e-10	DUF760 domain-containing protein (AHRD V3.3 *-* A0A1Q3CD93_CEPFO)
Solyc10g080150.2.1	-1.2175	0.0019116	0.011961	Methyltransferase (AHRD V3.3 *** A0A1U8ENF4_CAPAN)
Solyc05g005490.4.1	-1.21666	5.20619e-11	2.72384e-09	carbonic anhydrase
Solyc12g009290.1.1	-1.21633	0.0036034	0.0198944	Auxin responsive SAUR protein (AHRD V3.3 *** A0A2U1PXP1_ARTAN)
Solyc03g121170.3.1	-1.21568	0.0051991	0.0265811	GDSL esterase/lipase (AHRD V3.3 *** A0A2G3D0R1_CAPCH)
Solyc10g008200.4.1	-1.21317	0.00156857	0.0101351	Tyrosine aminotransferase (AHRD V3.3 *** A0A2G2XHT7_CAPBA)
Solyc04g080270.4.1	-1.2128	0.00456536	0.0240656	hypothetical protein (AHRD V3.3 *-* AT5G42710.3)
Solyc01g100200.3.1	-1.21219	8.23345e-08	1.97867e-06	gras4
Solyc11g067330.1.1	-1.20987	4.07262e-08	1.06538e-06	Acylsugar acyltransferase 3 (AHRD V3.3 *** A0A0B5J4M4_SOLHA)
Solyc06g063370.3.1	-1.20633	1.44972e-05	0.000192745	Chlorophyll a-b binding protein, chloroplastic (AHRD V3.3 *** A0A2G2V937_CAPBA)
Solyc08g079930.2.1	-1.20626	2.77328e-11	1.52712e-09	Subtilisin-like protease (AHRD V3.3 *** Q9LWA4_SOLLC)
Solyc04g005040.1.1	-1.20619	2.60419e-12	1.7794e-10	Metalloendoproteinase 1 (AHRD V3.3 *** A0A1J3JDB5_NOCCA)
Solyc01g096880.4.1	-1.20497	8.15261e-14	7.60185e-12	Major facilitator superfamily protein (AHRD V3.3 *** A0A1P8AZ04_ARATH)
Solyc06g082020.4.1	-1.20481	6.08201e-19	1.6152e-16	protein PSY1 (AHRD V3.3 *** XP_004242520.1)
Solyc01g059900.4.1	-1.2041	4.00898e-05	0.000464592	Dirigent protein (AHRD V3.3 *** K4AW97_SOLLC)
Solyc06g053387.1.1	-1.20407	4.00824e-12	2.65277e-10	Unknown protein
Solyc08g061830.1.1	-1.2033	0.0094715	0.0425053	Ubiquitinyl hydrolase 1 (AHRD V3.3 *-* A0A2G2W3P2_CAPBA)
Solyc01g090120.3.1	-1.20228	7.7287e-20	2.29616e-17	Uclacyanin-3 (AHRD V3.3 *** A0A1U8ED46_CAPAN)
Solyc00g021630.1.1	-1.2021	2.16898e-09	7.85929e-08	NADH-ubiquinone oxidoreductase chain 6 (AHRD V3.3 *** A0A0C5B7I5_9SOLA)
Solyc08g066510.3.1	-1.20101	0.000269924	0.00232281	GATA transcription factor (AHRD V3.3 *** K4CLM7_SOLLC)
Solyc01g099320.4.1	-1.20072	0.000460414	0.00366445	Nuclear transcription factor Y subunit B-4 (AHRD V3.3 *** A0A1U8DWS7_CAPAN)
Solyc06g068620.3.1	-1.19998	0.00726666	0.0345119	elongation factor (AHRD V3.3 *-* AT5G43150.1)
Solyc02g078100.3.1	-1.19813	2.32184e-09	8.34115e-08	Pistil-specific extensin-like protein (AHRD V3.3 *-* A0A2G3A881_CAPAN)
Solyc11g005150.3.1	-1.19806	2.53428e-12	1.73755e-10	entensin X55687
Solyc10g008900.3.1	-1.19786	1.37742e-07	3.10735e-06	Dirigent protein (AHRD V3.3 *** K4CY66_SOLLC)
Solyc06g075220.1.1	-1.19686	8.9035e-06	0.000127418	Fasciclin-like arabinogalactan protein 11 (AHRD V3.3 *** A0A2G2V1G2_CAPBA)
Solyc02g082930.3.1	-1.19674	0.00147471	0.00961013	acidic extracellular 27 kD chitinase
Solyc07g061840.1.1	-1.19594	0.00656715	0.031945	Unknown protein
Solyc04g071490.3.1	-1.19533	0.00515932	0.0264393	HSP20-like chaperones superfamily protein (AHRD V3.3 *-* A0A1P8AQG9_ARATH)
Solyc02g030480.4.1	-1.19404	2.25861e-07	4.85508e-06	Alcohol dehydrogenase superfamily (AHRD V3.3 *-* A0A200Q008_9MAGN)
Solyc02g080670.3.1	-1.19387	2.2228e-09	8.02655e-08	L-ascorbate oxidase-like protein (AHRD V3.3 *** A0A1U8FN33_CAPAN)
Solyc09g014280.1.1	-1.19376	3.66394e-07	7.50677e-06	HXXXD-type acyl-transferase family protein (AHRD V3.3 *** V5PZN5_9CARY)
Solyc02g062170.3.1	-1.19352	1.22513e-05	0.000166363	Chalcone-flavanone isomerase family protein (AHRD V3.3 *-* AT5G66230.1)
Solyc01g106130.1.1	-1.18906	0.00135377	0.00897097	F-box protein family-like (AHRD V3.3 *** Q6ZCS3_ORYSJ)
Solyc08g066270.3.1	-1.18615	0.00358585	0.0198303	receptor-like protein kinase HSL1 (AHRD V3.3 *** A0A1U7YIB3_NICSY)
Solyc12g055840.2.1	-1.18547	1.59748e-14	1.76396e-12	Glucan endo-1,3-beta-glucosidase 10 (AHRD V3.3 *** A0A1U8F6Q1_CAPAN)
Solyc11g006720.2.1	-1.18536	3.18368e-06	5.19273e-05	Transcription factor DIVARICATA (AHRD V3.3 *** A0A2G3AV26_CAPCH)
Solyc07g055970.1.1	-1.18494	7.43141e-05	0.000787828	Cytochrome P450 (AHRD V3.3 *** A0A200R878_9MAGN)
Solyc12g011140.3.1	-1.18481	4.98227e-07	9.86114e-06	Subtilisin-like protease (AHRD V3.3 *** A0A2G3BMA9_CAPCH)
Solyc08g074680.3.1	-1.18317	0.0014347	0.00940039	partialpolyphenol oxidase A
Solyc07g008710.3.1	-1.18257	0.000537331	0.00416139	MLP-like protein 43 (AHRD V3.3 *** A0A2U1L1Z2_ARTAN)
Solyc08g013930.4.1	-1.18195	3.62558e-11	1.97571e-09	Peroxidase (AHRD V3.3 *** K4CJ27_SOLLC)
Solyc02g080230.3.1	-1.18185	0.000559329	0.00429983	CRIB domain-containing protein RIC10 (AHRD V3.3 *** A0A1U8FUJ1_CAPAN)
Solyc08g078920.2.1	-1.18177	1.11236e-08	3.42189e-07	Bifunctional inhibitor/lipid-transfer protein/seed storage 2S albumin superfamily protein (AHRD V3.3 *** A0A2U1PU47_ARTAN)
Solyc01g086720.3.1	-1.18125	0.00671085	0.0324742	C2 calcium/lipid-binding plant phosphoribosyltransferase family protein (AHRD V3.3 *** A0A061DXG0_THECC)
Solyc01g098400.3.1	-1.17885	6.95835e-09	2.27039e-07	Histidine phosphotransfer protein (AHRD V3.3 *** A0A0A1WCB7_NICAT)
Solyc01g060020.4.1	-1.17644	0.000486763	0.00383344	beta-1,3-glucanase TOMB13GLUB
Solyc08g079240.4.1	-1.17574	0.00656638	0.031945	dimethylallyl%2C adenosine tRNA methylthiotransferase (AHRD V3.3 *** AT1G62780.1)
Solyc01g068550.2.1	-1.17244	0.00219155	0.0134088	O-methyltransferase (AHRD V3.3 *** A0A1B4Z3W3_9ROSA)
Solyc10g054440.3.1	-1.17212	3.48809e-16	5.26475e-14	arginine decarboxylase 1
Solyc02g070420.2.1	-1.1716	0.000137961	0.00132226	transmembrane protein (AHRD V3.3 *-* AT2G34530.1)
Solyc03g096980.1.1	-1.1702	7.30335e-08	1.78583e-06	Cytochrome P450 (AHRD V3.3 *** A0A200R6R8_9MAGN)
Solyc04g072850.4.1	-1.16924	7.17126e-08	1.75968e-06	Beta-D-xylosidase (AHRD V3.3 *** H1AC33_SOLLC)
Solyc06g083030.3.1	-1.16738	2.64095e-13	2.20745e-11	Carboxypeptidase (AHRD V3.3 *** A0A2G2WN52_CAPBA)
Solyc07g065330.3.1	-1.16679	1.8475e-10	8.57536e-09	Germin-like protein 11-1 (AHRD V3.3 *** A0A2G2WFI2_CAPBA)
Solyc05g009680.1.1	-1.16499	8.41753e-05	0.00087469	Eukaryotic aspartyl protease family protein (AHRD V3.3 *** Q9C6M0_ARATH)
Solyc02g091680.4.1	-1.16033	5.15018e-07	1.01647e-05	Beta-D-xylosidase (AHRD V3.3 *** H1AC33_SOLLC)
Solyc04g074740.4.1	-1.16003	5.49344e-27	6.40291e-24	Blue copper protein (AHRD V3.3 *** A0A2G2ZQN6_CAPAN)
Solyc11g006910.3.1	-1.15677	9.87696e-06	0.000139166	Ferredoxin (AHRD V3.3 *** K4D4V2_SOLLC)
Solyc05g012780.4.1	-1.15633	4.49228e-13	3.54316e-11	Protein ENHANCED DISEASE RESISTANCE 2-like (AHRD V3.3 *** A0A1J3E5X3_NOCCA)
Solyc01g009430.3.1	-1.1551	1.32084e-09	5.03841e-08	hypothetical protein (AHRD V3.3 *** AT2G27830.1)
Solyc03g098400.2.1	-1.15342	2.12051e-05	0.000268163	Receptor-like protein kinase (AHRD V3.3 *** A0A2R6P698_ACTCH)
Solyc04g009780.1.1	-1.15263	3.44553e-07	7.1079e-06	RING/U-box superfamily protein (AHRD V3.3 *** A0A2U1MY73_ARTAN)
Solyc11g006230.3.1	-1.15054	0.000117433	0.00115832	GRF1-interacting factor 1 (AHRD V3.3 *-* A0A2G2Y6I7_CAPAN)
Solyc04g008260.3.1	-1.1502	1.28913e-08	3.89151e-07	Purple acid phosphatase (AHRD V3.3 *** Q6J5M7_SOLTU)
Solyc06g050860.3.1	-1.14903	4.10596e-10	1.76523e-08	BTB/POZ domain-containing protein (AHRD V3.3 *** A0A2U1QE56_ARTAN)
Solyc02g072240.3.1	-1.1485	0.000418156	0.00339509	Cellulose synthase (AHRD V3.3 *** K4B8J8_SOLLC)
Solyc02g080190.3.1	-1.14785	4.19504e-09	1.42184e-07	Nuclear transport factor 2 (AHRD V3.3 *** A0A2G3A947_CAPAN)
Solyc01g106520.1.1	-1.14651	0.00778112	0.0364084	F-box SKIP23-like protein (DUF295) (AHRD V3.3 *** AT3G25750.2)
Solyc05g052040.1.1	-1.14617	4.70638e-05	0.000532577	ripening regulated protein DDTFR10/A
Solyc05g054060.3.1	-1.14593	0.00742086	0.0350811	UTP--glucose-1-phosphate uridylyltransferase (AHRD V3.3 *** A0A2G2ZK77_CAPAN)
Solyc08g079970.2.1	-1.14484	3.23636e-08	8.76114e-07	Subtilisin-like protease (AHRD V3.3 *** Q9LWA3_SOLLC)
Solyc08g081550.4.1	-1.14415	4.02103e-14	4.09521e-12	1-aminocyclopropane-1-carboxylate synthase (AHRD V3.3 *** B2NIX1_CAPCH)
Solyc11g066000.1.1	-1.14396	0.00145581	0.0095149	cyclin-dependent protein kinase inhibitor SMR3-like (AHRD V3.3 *-* A0A2I4FWF9_9ROSI)
Solyc10g008410.1.1	-1.14329	0.000641109	0.00480374	E3 ubiquitin-protein ligase RMA1H1 (AHRD V3.3 *** A0A2G3BCW2_CAPCH)
Solyc03g063040.4.1	-1.14274	0.00144966	0.0094836	Amino acid transporter (AHRD V3.3 *-* S8DQ51_9LAMI)
Solyc06g074990.3.1	-1.14123	0.000278623	0.00238983	putative high affinity nitrate transporter 2
Solyc12g005300.2.1	-1.14031	0.004814	0.0250242	Chlorophyllase 2 (AHRD V3.3 *** C1JZ62_9ROSI),Pfam:PF12740
Solyc09g065850.4.1	-1.13958	2.66465e-06	4.42632e-05	auxin-regulated IAA3
Solyc04g055100.1.1	-1.13939	0.000602639	0.00456439	DUF1191 domain-containing protein (AHRD V3.3 *** A0A1Q3BAW9_CEPFO)
Solyc09g083290.3.1	-1.1391	3.66228e-17	6.45669e-15	auxin-regulated IAA14
Solyc04g063210.3.1	-1.13816	0.000164363	0.0015326	Caffeoyl-CoA O-methyltransferase (AHRD V3.3 *** A0A2G2WYM3_CAPBA)
Solyc11g062360.2.1	-1.13738	0.000259715	0.00224787	transferring glycosyl group transferase (AHRD V3.3 *** AT5G12260.1)
Solyc06g064980.3.1	-1.13684	7.82686e-06	0.000114151	GDSL esterase/lipase 5-like (AHRD V3.3 *** A0A1U8FAQ0_CAPAN)
Solyc01g095820.2.1	-1.13678	1.2039e-06	2.13867e-05	RING/U-box superfamily protein (AHRD V3.3 *-* A0A2U1KEI5_ARTAN)
Solyc03g093360.3.1	-1.13666	6.99278e-14	6.57885e-12	PLAT/LH2 domain (AHRD V3.3 *** A0A200QDT2_9MAGN)
Solyc03g005760.1.1	-1.13596	1.25559e-06	2.2211e-05	Chlorophyll a-b binding protein, chloroplastic (AHRD V3.3 *** A0A2G2W7Q4_CAPBA)
Solyc04g082950.4.1	-1.13562	3.83721e-05	0.000447	galactan beta-1,4-galactosyltransferase GALS1 (AHRD V3.3 *** A0A2I4GGQ8_9ROSI)
Solyc06g050790.3.1	-1.13467	9.23451e-10	3.64173e-08	Amino acid transporter (AHRD V3.3 *** S8CJS6_9LAMI)
Solyc01g099520.3.1	-1.13451	1.53264e-19	4.28731e-17	Rapid alkalinization factor (AHRD V3.3 *** RALF_TOBAC)
Solyc02g070080.4.1	-1.13451	7.00213e-05	0.000750279	2-oxoglutarate (2OG) and Fe(II)-dependent oxygenase superfamily protein (AHRD V3.3 *** A0A2U1QGX7_ARTAN)
Solyc09g075810.3.1	-1.1332	4.37892e-07	8.81668e-06	Mavicyanin (AHRD V3.3 *** A0A2G3CT63_CAPCH)
Solyc10g084840.2.1	-1.13268	0.000591872	0.00449626	Thaumatin-like protein (AHRD V3.3 *** A0A2G2VUW4_CAPBA)
Solyc02g079480.1.1	-1.13227	0.0096446	0.0431161	FAD-binding Berberine family protein (AHRD V3.3 *** A0A2U1MQE5_ARTAN)
Solyc02g064800.3.1	-1.13167	0.000125138	0.00122225	WD40 repeat (AHRD V3.3 *** A0A200PS16_9MAGN)
Solyc06g083680.3.1	-1.1308	3.12545e-06	5.11083e-05	Photosystem I reaction center subunit IV (AHRD V3.3 *-* A0A2P6U4S6_CHLSO)
Solyc01g079550.2.1	-1.13072	5.05382e-08	1.29146e-06	Multidrug resistance protein ABC transporter family protein, putative (AHRD V3.3 *** A0A061DZ20_THECC)
Solyc01g096670.4.1	-1.13066	2.85249e-23	1.70986e-20	Cytochrome P450 (AHRD V3.3 *** A0A2U1MC34_ARTAN)
Solyc05g008640.1.1	-1.13029	1.04437e-05	0.000145877	RING/U-box superfamily protein (AHRD V3.3 *-* A0A2U1QJE6_ARTAN)
Solyc09g064520.3.1	-1.1296	2.24364e-05	0.00028136	Leucine-rich repeat receptor-like protein kinase (AHRD V3.3 *** A0A061DND1_THECC)
Solyc09g075650.3.1	-1.1294	9.7163e-12	5.82202e-10	DUF3511 domain protein, putative (DUF3511) (AHRD V3.3 *** O22262_ARATH)
Solyc12g009800.3.1	-1.12881	0.000313103	0.00264555	Purple acid phosphatase (AHRD V3.3 *** M1AD80_SOLTU)
Solyc01g107540.4.1	-1.12878	1.25023e-07	2.86353e-06	Plant basic secretory protein (BSP) family protein (AHRD V3.3 *** I3SK49_MEDTR)
Solyc01g080280.3.1	-1.12843	4.03079e-08	1.05707e-06	chloroplast glutamine synthetase
Solyc08g062810.1.1	-1.12678	0.00873155	0.0398391	DUF3511 domain-containing protein (AHRD V3.3 *-* A0A1Q3CMD7_CEPFO)
Solyc08g066310.3.1	-1.12599	0.00731707	0.0346763	Receptor-like protein kinase (AHRD V3.3 *-* A0A2D1PG71_9ROSI)
Solyc01g105050.3.1	-1.12562	4.14641e-06	6.56542e-05	Chlorophyll a-b binding protein, chloroplastic (AHRD V3.3 *** A0A2G3AWK5_CAPCH)
Solyc02g093750.3.1	-1.12489	2.58662e-09	9.10525e-08	C3H4 type zinc finger protein (DUF23) (AHRD V3.3 *** Q9FM26_ARATH)
Solyc07g065110.1.1	-1.12476	1.54211e-11	8.83976e-10	Bifunctional inhibitor/plant lipid transfer protein/seed storage helical domain containing protein (AHRD V3.3 *** A0A2P5G019_TREOI)
Solyc05g056050.3.1	-1.12462	0.00967903	0.0432239	Chlorophyll a-b binding protein, chloroplastic (AHRD V3.3 *** A0A2G3CJ50_CAPCH)
Solyc12g013650.2.1	-1.12367	2.82646e-07	5.95372e-06	DUF1218 domain-containing protein (AHRD V3.3 *** A0A1Q3DB07_CEPFO)
Solyc11g062350.2.1	-1.1236	5.35315e-14	5.17553e-12	Blue copper protein (AHRD V3.3 *** A0A2K3N6C5_TRIPR)
Solyc01g099510.2.1	-1.12276	0.00016747	0.00156018	Unknown protein
Solyc09g056390.1.1	-1.12244	0.0116859	0.0499428	Unknown protein
Solyc12g019890.2.1	-1.1224	6.18093e-15	7.58281e-13	Glucan endo-1,3-beta-glucosidase 5 (AHRD V3.3 *** A0A1U8GB40_CAPAN)
Solyc07g020790.4.1	-1.12195	2.44826e-05	0.000303036	plastidic glucose translocator 3
Solyc10g086030.2.1	-1.12112	1.26686e-06	2.23915e-05	Interactor of constitutive active ROPs (AHRD V3.3 *** A0A2K3PRJ7_TRIPR)
Solyc05g009915.1.1	-1.12093	8.89273e-07	1.63783e-05	CLAVATA3/ESR (CLE)-related protein 12 (AHRD V3.3 *** A0A2G3B6J3_CAPCH)
Solyc01g111660.4.1	-1.11974	3.32686e-10	1.46633e-08	plasma membrane intrinsic protein 2.8
Solyc07g007550.3.1	-1.11721	7.54963e-17	1.26974e-14	Heparanase-like protein 3 (AHRD V3.3 *** A0A2G2WBB8_CAPBA)
Solyc01g107340.4.1	-1.11636	3.50379e-10	1.52826e-08	classical arabinogalactan protein 9 (AHRD V3.3 *-* XP_004230717.1)
Solyc06g034360.2.1	-1.11399	0.000575624	0.0044027	Pectinesterase (AHRD V3.3 *** A0A2G2Z8Q4_CAPAN)
Solyc10g078530.2.1	-1.11297	1.23507e-06	2.18849e-05	Patatin (AHRD V3.3 *** A0A2G3BI67_CAPCH)
Solyc04g011490.4.1	-1.11271	3.41552e-09	1.17858e-07	CASP-like protein (AHRD V3.3 *** A0A2G2XA87_CAPBA)
Solyc07g042470.3.1	-1.11195	7.66882e-10	3.10003e-08	Small auxin up-regulated RNA64
Solyc08g014000.3.1	-1.11185	0.000875021	0.00623148	lipoxygenase A
Solyc07g017600.3.1	-1.10974	7.77761e-06	0.000113552	Pectinesterase (AHRD V3.3 *** A0A1U8F5L9_CAPAN)
Solyc03g116370.3.1	-1.10709	5.39624e-13	4.20867e-11	Microtubule-associated protein RP/EB family member 1C (AHRD V3.3 *** A0A2G3B798_CAPCH)
Solyc06g061280.3.1	-1.10561	6.71111e-06	0.000100413	NAD(P)-binding Rossmann-fold superfamily protein (AHRD V3.3 *** A0A2U1LGD5_ARTAN)
Solyc12g099730.3.1	-1.10414	3.44461e-05	0.000408524	DUF604 domain-containing protein (AHRD V3.3 *** A0A1Q3CIC6_CEPFO)
Solyc11g072570.2.1	-1.10314	3.32453e-08	8.97665e-07	protein NRT1/ PTR FAMILY 2.7-like (AHRD V3.3 *** A0A2I4HW78_9ROSI)
Solyc05g050460.1.1	-1.10116	9.61197e-06	0.000135889	Zinc finger CCCH domain-containing protein 53-like (AHRD V3.3 *-* A0A2K3PKI8_TRIPR)
Solyc12g011430.3.1	-1.09723	0.000152602	0.00143634	Beta-lactamase-like (AHRD V3.3 *** A0A200QS30_9MAGN)
Solyc02g076990.3.1	-1.09359	0.00186217	0.0117147	Phospholipase A1-II 1 (AHRD V3.3 *** A0A1U8FS88_CAPAN)
Solyc01g100120.4.1	-1.09233	0.00379799	0.0207721	Kinesin-like protein (AHRD V3.3 *** A0A2G2XY75_CAPAN)
Solyc03g025410.4.1	-1.09133	4.14127e-07	8.39458e-06	NAD(P)-binding Rossmann-fold superfamily protein (AHRD V3.3 *** Q8H1Q6_ARATH)
Solyc01g108170.3.1	-1.09132	6.71555e-11	3.40319e-09	BEST plant protein match is: (TAIR:plant.1) protein, putative (AHRD V3.3 *** G7JLA4_MEDTR)
Solyc05g005860.3.1	-1.09038	0.00158377	0.0102019	WAT1-related protein (AHRD V3.3 *** K4BWB3_SOLLC)
Solyc02g089160.3.1	-1.08991	0.000858191	0.00614081	dwarf
Solyc01g008420.3.1	-1.08841	0.00527186	0.0268782	Protein DETOXIFICATION (AHRD V3.3 *** S6BP63_TOBAC)
Solyc11g008630.3.1	-1.08826	8.20957e-05	0.000857326	HXXXD-type acyl-transferase family protein (AHRD V3.3 *** A0A2U1LG13_ARTAN)
Solyc07g062700.3.1	-1.08766	5.12813e-12	3.32063e-10	Calcium-binding EF-hand family protein (AHRD V3.3 *** A0A2U1MZJ3_ARTAN)
Solyc04g080550.4.1	-1.08761	0.0106688	0.0466413	Isoflavone reductase-like protein (AHRD V3.3 *** A0A2G2V5Y4_CAPBA)
Solyc04g015620.3.1	-1.08636	7.84874e-08	1.90807e-06	DUF642 domain-containing protein (AHRD V3.3 *** A0A1Q3AUQ6_CEPFO)
Solyc01g087850.2.1	-1.08529	6.93972e-22	3.23545e-19	serine protease SBT3
Solyc04g080760.3.1	-1.08496	4.53812e-16	6.65803e-14	Peroxidase (AHRD V3.3 *** K4BVF5_SOLLC)
Solyc05g005320.1.1	-1.08424	0.0013829	0.00911794	Unknown protein
Solyc12g009650.2.1	-1.08356	0.000243981	0.00213458	Sl proline-rich protein
Solyc12g017530.1.1	-1.08229	0.0103847	0.0457039	Unknown protein
Solyc11g072860.2.1	-1.0808	6.70049e-10	2.74563e-08	Histone H4 (AHRD V3.3 *-* F2E7L1_HORVV)
Solyc10g077120.3.1	-1.07883	2.15867e-10	9.91003e-09	Photosystem II core complex proteins psbY, chloroplastic (AHRD V3.3 *-* A0A1U8E9S9_CAPAN)
Solyc03g123620.4.1	-1.07824	4.06981e-11	2.18375e-09	Pectinesterase (AHRD V3.3 *** A0A2G3D1E1_CAPCH)
Solyc01g104720.3.1	-1.07782	8.04431e-07	1.49884e-05	thionin-like protein (AHRD V3.3 -** AT1G25275.1)
Solyc01g080570.4.1	-1.07616	0.000759716	0.00553624	Inosine-uridine preferring nucleoside hydrolase family protein (AHRD V3.3 *** A0A2U1LEG5_ARTAN)
Solyc08g066890.4.1	-1.07598	3.70814e-14	3.81357e-12	bark storage protein A-like (AHRD V3.3 *** A0A2I4E5T4_9ROSI)
Solyc05g006550.4.1	-1.07597	1.53846e-08	4.57829e-07	Microtubule-associated protein TORTIFOLIA1 (AHRD V3.3 *-* A0A1J3JY05_NOCCA)
Solyc02g080660.3.1	-1.07581	3.2664e-10	1.44272e-08	Glucan endo-1,3-beta-glucosidase 1 (AHRD V3.3 *** A0A1U8FWM4_CAPAN)
Solyc03g097420.3.1	-1.07571	0.002421	0.01448	HVA22-like protein (AHRD V3.3 *** A0A2G3A0I0_CAPAN)
Solyc06g066540.1.1	-1.07395	0.0114821	0.0492827	Ethylene-responsive transcription factor (AHRD V3.3 *-* A0A2G2XMU8_CAPBA)
Solyc06g007910.4.1	-1.07341	8.15935e-08	1.96311e-06	Gibberellin regulated protein (AHRD V3.3 *** A0A2U1PE48_ARTAN)
Solyc10g055230.1.1	-1.07308	1.17402e-15	1.62046e-13	Dirigent protein (AHRD V3.3 *** K4D1B5_SOLLC)
Solyc03g006050.4.1	-1.07284	7.43505e-07	1.39813e-05	receptor-like protein 51 (AHRD V3.3 *-* A0A2I4GVM3_9ROSI)
Solyc03g080150.3.1	-1.07235	5.97976e-08	1.49887e-06	Peroxidase (AHRD V3.3 *** K4BHZ1_SOLLC)
Solyc11g031950.1.1	-1.07209	1.2339e-13	1.11384e-11	Glucuronoxylan 4-O-methyltransferase 2 (AHRD V3.3 *** A0A2G2VV10_CAPBA)
Solyc10g005480.3.1	-1.0715	1.64553e-08	4.82843e-07	F-box family protein (AHRD V3.3 *** A0A2U1N101_ARTAN)
Solyc10g005050.3.1	-1.07135	7.62497e-11	3.81794e-09	Protein CURVATURE THYLAKOID 1B, chloroplastic (AHRD V3.3 *** A0A2G3BDB1_CAPCH)
Solyc07g039310.1.1	-1.07093	0.0010305	0.00712584	lysine-specific histone demethylase 1 homolog 1 (AHRD V3.3 *** A0A2I4HTG5_9ROSI)
Solyc02g068300.3.1	-1.07072	1.99605e-15	2.70175e-13	Lectin-receptor kinase (AHRD V3.3 *** A0A2U1KV35_ARTAN)
Solyc03g113280.3.1	-1.06911	3.54486e-05	0.000418757	Integral membrane HPP family protein (AHRD V3.3 *** A0A2U1NK12_ARTAN)
Solyc03g026370.1.1	-1.06904	2.39506e-07	5.13262e-06	Peptidoglycan-binding LysM domain-containing protein (AHRD V3.3 *** A0A2U1MKY7_ARTAN)
Solyc01g006400.4.1	-1.0687	1.44105e-06	2.51944e-05	Pistil extensin like protein, partial CDS only (AHRD V3.3 *-* Q7DLN2_TOBAC)
Solyc02g081210.3.1	-1.06836	7.87877e-09	2.53134e-07	Expansin (AHRD V3.3 *** K4B9Z1_SOLLC)
Solyc01g095860.3.1	-1.06807	0.00188725	0.0118475	RING/U-box superfamily protein (AHRD V3.3 *** A0A2U1QFN9_ARTAN)
Solyc05g013630.1.1	-1.06731	2.42174e-13	2.04049e-11	protein kreg-1 (AHRD V3.3 *** XP_004239134.1)
Solyc03g005880.3.1	-1.06521	1.43815e-08	4.29194e-07	Bidirectional sugar transporter SWEET (AHRD V3.3 *** A0A142DVG2_SOLTU)
Solyc12g010170.2.1	-1.06488	2.19936e-08	6.27426e-07	bHLH transcription factor 070
Solyc11g013310.2.1	-1.06449	7.19717e-08	1.76398e-06	Auxin transporter-like protein 3 (AHRD V3.3 *** A0A2G2ZP08_CAPAN)
Solyc03g113570.1.1	-1.06437	9.09045e-10	3.59167e-08	Germin (AHRD V3.3 *** A0A200QNF0_9MAGN)
Solyc10g150145.1.1	-1.06403	2.12192e-13	1.81442e-11	Late embryogenesis abundant (LEA) hydroxyproline-rich glycoprotein family (AHRD V3.3 *** Q9SVC8_ARATH)
Solyc01g080130.2.1	-1.06337	9.839e-08	2.30125e-06	Cytochrome P450 family protein (AHRD V3.3 *** Q9M8K3_ARATH)
Solyc03g117050.4.1	-1.06121	2.10816e-05	0.000267085	NOD26-like intrinsic protein 6.1
Solyc02g063180.4.1	-1.05641	7.17782e-05	0.000766364	UDP-N-acetylenolpyruvoylglucosamine reductase (AHRD V3.3 *-* A0A200Q3E8_9MAGN)
Solyc08g067480.4.1	-1.05428	3.64317e-15	4.54962e-13	V-ATPase proteolipid subunit (AHRD V3.3 *** A0A200Q0M0_9MAGN)
Solyc05g054900.3.1	-1.05374	0.00824557	0.0381483	Blue copper protein (AHRD V3.3 *-* A0A2K3LCQ8_TRIPR)
Solyc11g010990.3.1	-1.0529	1.11081e-05	0.000153725	Cinnamyl alcohol dehydrogenase (AHRD V3.3 *** A0A2K3MPD7_TRIPR)
Solyc09g075320.1.1	-1.04996	6.60112e-05	0.000715718	RING-H2 finger protein ATL5-like (AHRD V3.3 *** A0A2I4EZH4_9ROSI)
Solyc11g069560.2.1	-1.04874	0.000333661	0.00279116	glycosyltransferase family protein 2 (AHRD V3.3 *** AT5G60700.2)
Solyc09g005690.3.1	-1.04775	1.97369e-05	0.00025218	Type I inositol polyphosphate 5-phosphatase 5 (AHRD V3.3 *-* A0A199V5W7_ANACO)
Solyc02g089210.4.1	-1.04755	0.000995698	0.00693321	MADS box transcription factor (AHRD V3.3 *** Q689E7_GENTR)
Solyc01g080790.3.1	-1.04732	1.25594e-05	0.000169888	Plant basic secretory protein (BSP) family protein (AHRD V3.3 *** I3SK49_MEDTR)
Solyc08g065500.2.1	-1.04675	9.27559e-05	0.000947674	Protein phosphatase 2C family protein (AHRD V3.3 *** A0A2U1LRS6_ARTAN)
Solyc02g087410.4.1	-1.04643	2.69054e-08	7.50633e-07	ABC transporter B family member 18 (AHRD V3.3 *** A0A1U8FQF4_CAPAN)
Solyc11g069280.2.1	-1.04372	3.03685e-05	0.000366167	Late embryogenesis abundant (LEA) protein-related protein (AHRD V3.3 *** A0A2U1KMH6_ARTAN)
Solyc02g091260.1.1	-1.04297	0.00137407	0.00907682	Mediator of RNA polymerase II transcription subunit (AHRD V3.3 *** Q9ZU37_ARATH)
Solyc11g066430.2.1	-1.04285	1.47148e-12	1.06355e-10	histone H2B
Solyc12g009430.2.1	-1.04273	0.000463313	0.00367608	Methyltransferase FkbM (AHRD V3.3 *** A0A200QJ89_9MAGN)
Solyc03g115640.3.1	-1.04234	1.68934e-06	2.8909e-05	DUF538 domain-containing protein (AHRD V3.3 *** A0A1Q3AZJ7_CEPFO)
Solyc12g008350.3.1	-1.04088	0.00544981	0.0275179	dehydration responsive element binding protein 2
Solyc03g058430.3.1	-1.0408	1.76631e-07	3.87628e-06	Fatty acid desaturase (AHRD V3.3 *** E7CCC0_9BRAS)
Solyc12g015690.3.1	-1.04016	1.62387e-07	3.60136e-06	fasciclin-like arabinogalactan protein 1 (AHRD V3.3 *** A0A1U8G960_CAPAN)
Solyc11g007930.1.1	-1.03726	1.51886e-05	0.000200666	Histone H2B (AHRD V3.3 *** A0A328DBY2_9ASTE)
Solyc12g009450.3.1	-1.03569	0.00152549	0.00989636	NBS-LRR protein (AHRD V3.3 *** Q9SM52_SOLAC)
Solyc04g079860.1.1	-1.03546	0.00232044	0.0140417	Hexosyltransferase (AHRD V3.3 *** A0A2G2ZRY0_CAPAN)
Solyc07g063560.4.1	-1.03546	1.15757e-05	0.000159043	Cotton fiber (DUF761) (AHRD V3.3 *** F4HTI9_ARATH)
Solyc10g052510.2.1	-1.03477	0.00025485	0.00221581	Isoflavone reductase homolog (AHRD V3.3 *** IFRH_SOLTU)
Solyc03g080110.3.1	-1.03383	0.00261806	0.0154549	Heavy metal-associated isoprenylated plant protein (AHRD V3.3 *-* A0A2R6RSE0_ACTCH)
Solyc01g103790.3.1	-1.03254	0.005947	0.0295449	Protein kinase superfamily protein (AHRD V3.3 *-* A0A2U1PSD3_ARTAN)
Solyc01g080010.2.1	-1.03232	0.000125128	0.00122225	xyloglucan endoglucanase inhibitor
Solyc05g006030.3.1	-1.03171	3.41238e-12	2.30941e-10	D-ribose-binding periplasmic (AHRD V3.3 *** A0A0B0Q0N1_GOSAR)
Solyc04g081870.4.1	-1.0313	0.00473221	0.0246858	Expansin A11
Solyc07g054730.1.1	-1.03101	5.9989e-11	3.08473e-09	Wound-responsive family protein (AHRD V3.3 *** AT4G28240.1)
Solyc04g072920.4.1	-1.03087	0.000105794	0.00106403	Trehalose 6-phosphate phosphatase (AHRD V3.3 *** A0A2G3CNJ5_CAPCH)
Solyc08g080640.2.1	-1.03047	1.82359e-06	3.10795e-05	NP24 protein precursor
Solyc05g006700.4.1	-1.03041	9.17364e-06	0.000130749	Wall-associated receptor kinase-like protein (AHRD V3.3 *** A0A2K3NTT9_TRIPR)
Solyc02g089550.3.1	-1.0303	1.26731e-08	3.84239e-07	protein NSP-INTERACTING KINASE 1 (AHRD V3.3 *** A0A1U8FR57_CAPAN)
Solyc08g080670.1.1	-1.02946	0.00237034	0.0142632	Pathogenesis-related 5-like protein
Solyc02g093960.3.1	-1.02776	5.70835e-09	1.89796e-07	Endosomal targeting BRO1-like domain-containing protein (AHRD V3.3 *** A0A2U1PPW2_ARTAN)
Solyc10g079600.2.1	-1.02611	9.72628e-06	0.000137228	Two-component response regulator ARR9 (AHRD V3.3 *** A0A2G2VW67_CAPBA)
Solyc02g072270.3.1	-1.02582	0.00123195	0.00829737	RING/FYVE/PHD zinc finger superfamily protein (AHRD V3.3 *** B6SN54_MAIZE)
Solyc09g014520.3.1	-1.02439	1.27193e-06	2.24622e-05	Chlorophyll a-b binding protein, chloroplastic (AHRD V3.3 *** A0A2G3BKI1_CAPCH)
Solyc10g086650.1.1	-1.02409	0.000227661	0.00201448	Glyoxal oxidase (AHRD V3.3 *** A0A200R4V9_9MAGN)
Solyc12g008680.3.1	-1.02397	3.51957e-07	7.2535e-06	Unknown protein
Solyc04g016270.2.1	-1.02318	2.93448e-13	2.39554e-11	Unknown protein
Solyc05g005150.1.1	-1.02318	2.78604e-10	1.241e-08	F-box/Kelch repeat-containing F-box family protein (AHRD V3.3 *** C4PVT9_ARATH)
Solyc06g083500.4.1	-1.02294	1.29342e-06	2.27933e-05	Serine/threonine-protein kinase PBS1 (AHRD V3.3 *** A0A2G2WN41_CAPBA)
Solyc07g006320.4.1	-1.02196	8.01117e-06	0.000116314	auxin canalization protein (DUF828) (AHRD V3.3 *** AT5G57770.2)
Solyc07g048060.3.1	-1.02153	0.000334296	0.00279424	Cytochrome b561 and DOMON domain-containing protein (AHRD V3.3 *-* A0A2G3BZZ3_CAPCH)
Solyc01g005320.2.1	-1.02102	2.67684e-10	1.19744e-08	3-oxo-5-alpha-steroid 4-dehydrogenase (DUF1295) (AHRD V3.3 *** O81042_ARATH)
Solyc06g083070.3.1	-1.02098	0.000231909	0.00204515	Fimbrin-2 (AHRD V3.3 *** A0A2G2WN11_CAPBA)
Solyc03g096350.3.1	-1.02052	1.05018e-05	0.000146494	Transcription factor DIVARICATA (AHRD V3.3 *** A0A1U8G0H1_CAPAN)
Solyc06g062930.1.1	-1.019	0.00017821	0.00164201	hypothetical protein (AHRD V3.3 *-* AT1G54120.1)
Solyc08g082460.4.1	-1.01673	1.4912e-05	0.000197384	Protein kinase domain (AHRD V3.3 *-* A0A200QL53_9MAGN)
Solyc07g008250.3.1	-1.01574	0.000426973	0.00345364	F-box protein (AHRD V3.3 *** S4T6I7_CAPAN)
Solyc05g054780.3.1	-1.01551	5.31359e-13	4.15966e-11	Dirigent protein (AHRD V3.3 *** K4C2F5_SOLLC)
Solyc12g096570.1.1	-1.01524	0.0043481	0.0231648	auxin-regulated gene involved in organ size (AHRD V3.3 -** AT3G59900.1)
Solyc02g065380.3.1	-1.0152	2.19999e-19	6.07314e-17	Cold-regulated plasma membrane protein 2 (AHRD V3.3 *** A0A1U8FJM9_CAPAN)
Solyc02g063390.4.1	-1.01515	3.56561e-05	0.000420733	3-oxo-5-alpha-steroid 4-dehydrogenase (DUF1295) (AHRD V3.3 *** O81042_ARATH)
Solyc07g006900.2.1	-1.01465	8.63364e-05	0.000893605	SlPIN2
Solyc00g022100.1.1	-1.0131	0.00267639	0.0157197	Ribosomal protein L10 (AHRD V3.3 *** E0D3E6_SOLLC)
Solyc07g042520.4.1	-1.0127	2.4934e-05	0.000307961	Sucrose synthase (AHRD V3.3 *** K4CEB3_SOLLC)
Solyc05g056140.4.1	-1.01166	3.5049e-06	5.65202e-05	Zinc finger (C3HC4-type RING finger) family protein (AHRD V3.3 *** A0A2U1N0U6_ARTAN)
Solyc01g088530.2.1	-1.01144	0.000229204	0.00202386	hypothetical protein (AHRD V3.3 *** AT2G44600.1)
Solyc07g063110.4.1	-1.00743	0.000106041	0.001066	Core-2/I-branching beta-1,6-N-acetylglucosaminyltransferase family protein (AHRD V3.3 *** A0A2U1NIM9_ARTAN)
Solyc03g031620.3.1	-1.00732	0.000646776	0.00483412	5'-adenylylsulfate reductase 1, chloroplastic (AHRD V3.3 *** S5ZQS8_NICAT)
Solyc02g082870.4.1	-1.00729	7.86545e-06	0.000114516	AMP-dependent synthetase/ligase (AHRD V3.3 *** A0A200QNJ1_9MAGN)
Solyc01g096450.4.1	-1.00662	1.02372e-09	4.00702e-08	Eukaryotic aspartyl protease family protein (AHRD V3.3 *** A0A2U1PLR1_ARTAN)
Solyc02g087580.3.1	-1.00619	7.32475e-05	0.000778882	Actin cross-linking (AHRD V3.3 *** A0A2U1P1I6_ARTAN)
Solyc05g013460.4.1	-1.00365	0.000173927	0.00161032	Protein DETOXIFICATION (AHRD V3.3 *** A0A1Q3CW99_CEPFO)
Solyc08g006730.1.1	-1.00364	4.83417e-05	0.00054352	Tyramine N-feruloyltransferase 10/30 (AHRD V3.3 *** A0A2G2VBA1_CAPBA)
Solyc06g069470.3.1	-1.00335	3.70411e-14	3.81357e-12	Glycerophosphodiester phosphodiesterase GDPD5 (AHRD V3.3 *** A0A2G2WM22_CAPBA)
Solyc02g079530.4.1	-1.00298	0.00611011	0.0301411	G-type lectin S-receptor-like serine/threonine-protein kinase (AHRD V3.3 *** A0A2G2VAF6_CAPBA)
Solyc05g011940.4.1	-1.0025	7.21051e-09	2.34174e-07	Cytochrome (AHRD V3.3 *** A0A1U8EYC2_CAPAN)
Solyc03g026070.4.1	-1.00149	3.85609e-05	0.000448452	Homeobox-leucine zipper protein ROC5 (AHRD V3.3 *** A0A2G2X6G6_CAPBA)
Solyc07g005910.3.1	-1.00101	0.00405539	0.021934	Zein-binding domain-containing protein (AHRD V3.3 *** A0A2U1P5H2_ARTAN)
