# Supplementary material for: Application of ethanol alleviates heat damage to leaf growth and yield in tomato
Source: Front Plant Sci. 2024 Feb 19;15:1325365. doi: 10.3389/fpls.2024.1325365 (PMC10909983; doi:10.3389/fpls.2024.1325365)
Supplement: Supplementary file 9 [file Table_8.xlsx]

## Sheet: UP
Supplemental Table S8. Up-regulated DEGs of E3 vs W3 in green fruit (log2 fold change ≧ 1.0, p_value < 0.05, p_adj < 0.05).
GeneID	log2FoldChange	p_value	p_adj	Annotation	IDR
Solyc09g098120	6.23882	3.52009e-07	0.000386418	DUF1264 domain-containing protein (AHRD V3.3 *** A0A1Q3BQQ5_CEPFO)	TRUE
Solyc07g064210	6.01254	7.37338e-05	0.0133399	Preproalbumin PawS1 (AHRD V3.3 *** A0A023GYI9_9ASTR)	FALSE
Solyc09g065470	5.6696	0.000176334	0.0234632	Vicilin-like antimicrobial peptides 2-1 (AHRD V3.3 *** AMP21_MACIN)	FALSE
Solyc09g014750	5.6334	1.0917e-06	0.00092186	Late embryogenesis abundant protein (AHRD V3.3 *** W0FHP9_9CARY)	TRUE
Solyc08g080480	5.52833	0.000235508	0.028101	2S sulfur-rich seed storage protein 2-like (AHRD V3.3 *** XP_004245641.1)	TRUE
Solyc09g090150	5.44724	2.99683e-08	6.57955e-05	Seed storage protein (AHRD V3.3 *** Q2TPW5_9ROSI)	TRUE
Solyc02g090370	5.31426	6.70786e-06	0.00300553	Reticulon-like protein (AHRD V3.3 *** A0A2G3ABJ1_CAPAN)	TRUE
Solyc08g080490	5.20137	2.71319e-10	1.4892e-06	2S albumin (AHRD V3.3 *-* B6EU55_BEREX)	FALSE
Solyc02g077970	5.15215	0.000101219	0.0159875	Late embryogenesis abundant protein (AHRD V3.3 *** A0A200PQ87_9MAGN)	TRUE
Solyc09g025210	5.10873	4.08062e-11	5.88659e-07	alcohol dehydrogenase-2	TRUE
Solyc06g060840	4.98671	1.33297e-06	0.00100915	Oleosin (AHRD V3.3 *** A0A1U8H204_CAPAN)	TRUE
Solyc06g033850	4.96046	2.29815e-06	0.00156913	Dehydration-responsive element-binding protein 2d-like (AHRD V3.3 *-* A0A2K3MMA2_TRIPR)	FALSE
Solyc09g072560	4.91162	1.82556e-08	5.01001e-05	11S globulin seed storage protein 2 (AHRD V3.3 *** A0A2G2X5V4_CAPBA)	TRUE
Solyc09g082340	4.5282	2.86212e-07	0.000369635	GDP-mannose transporter GONST2 (AHRD V3.3 *** A0A2G2ZE83_CAPAN)	TRUE
Solyc04g054523	4.513	2.93478e-05	0.00740611	Unknown protein	TRUE
Solyc06g034040	4.40663	8.19035e-05	0.0145015	Oleosin (AHRD V3.3 *** A0A2G3C5Y7_CAPCH)	FALSE
Solyc01g112230	4.32528	5.36241e-11	5.88659e-07	Plant EC metallothionein-like protein (AHRD V3.3 *** A0A200PQZ1_9MAGN)	FALSE
Solyc09g008770	4.28371	0.000201195	0.0255331	Late embryogenesis abundant protein (AHRD V3.3 *** A0A200R5C6_9MAGN)	TRUE
Solyc02g079240	4.26284	0.000356037	0.0350529	Unknown protein	TRUE
Solyc01g098770	4.22002	0.000419825	0.0391991	Eukaryotic aspartyl protease family protein (AHRD V3.3 *** A0A2U1M5P2_ARTAN)	FALSE
Solyc03g019820	4.15997	0.000266151	0.029813	tonoplast intrinsic protein 3.2	TRUE
Solyc12g010920	4.12392	7.20922e-06	0.00305398	Oleosin (AHRD V3.3 *** A0A2G2YTI7_CAPAN)	TRUE
Solyc03g096040	4.11979	2.68434e-05	0.00701602	1-Cys peroxiredoxin (AHRD V3.3 *** A0A2I4FQD8_9ROSI)	FALSE
Solyc02g063410	4.0694	0.000125985	0.0186891	Hydroxyproline-rich glycoprotein family protein (AHRD V3.3 *** A0A2U1M3E1_ARTAN)	TRUE
Solyc05g052015	3.92356	0.000597151	0.0497506	Unknown protein	FALSE
Solyc03g005580	3.83023	2.72798e-08	6.57955e-05	Seed storage protein (AHRD V3.3 *** Q2TPW5_9ROSI)	TRUE
Solyc03g097580	3.78825	2.83469e-05	0.00723671	Bidirectional sugar transporter SWEET (AHRD V3.3 *** A0A142DVH1_SOLTU)	FALSE
Solyc06g069260	3.76949	0.000423725	0.0392527	Oleosin (AHRD V3.3 *** A0A200Q8I2_9MAGN)	FALSE
Solyc08g078760	3.74144	6.02675e-05	0.0120638	transmembrane protein (AHRD V3.3 *** AT4G17250.1)	FALSE
Solyc10g074440	3.62799	0.000149582	0.0214069	Chitinase (AHRD V3.3 *** B9VRK7_CAPAN)	TRUE
Solyc06g007920	3.59771	7.81997e-08	0.000143073	Gibberellin regulated protein (AHRD V3.3 *** A0A2U1PE48_ARTAN)	FALSE
Solyc12g006680	3.57586	1.20102e-07	0.00017579	Early nodulin-93 (AHRD V3.3 *** A0A2G2VER8_CAPBA)	FALSE
Solyc05g005380	3.49855	8.8221e-07	0.000807038	Nuclear factor Y, subunit B6 (AHRD V3.3 *** A0A2U1NB03_ARTAN)	TRUE
Solyc02g094460	3.49761	1.01571e-07	0.000161677	B3 domain transcription factor (AHRD V3.3 *** Q2HUJ5_MEDTR)	TRUE
Solyc07g054800	3.47143	0.000304596	0.031548	tRNA(His) guanylyltransferase 1 (AHRD V3.3 *** A0A1U8DYC8_CAPAN)	FALSE
Solyc08g078890	3.29572	1.37438e-05	0.00464224	Bifunctional inhibitor/lipid-transfer protein/seed storage 2S albumin superfamily protein (AHRD V3.3 *-* Q9SXE7_ARATH)	TRUE
Solyc02g086490	3.26831	1.88627e-10	1.38044e-06	Oleosin (AHRD V3.3 *** A0A1U8FYV0_CAPAN)	TRUE
Solyc04g006983	3.229	1.01153e-06	0.000888325	Unknown protein	FALSE
Solyc07g006390	3.22605	3.29936e-05	0.00796016	EG45-like domain containing protein (AHRD V3.3 *** A0A2I4FJD4_9ROSI)	FALSE
Solyc01g096280	3.17833	8.28245e-06	0.00324716	Calcium-binding protein PBP1 (AHRD V3.3 *** A0A1U8G283_CAPAN)	FALSE
Solyc12g094440	3.16104	9.02108e-06	0.0034747	High mobility group B protein 9 (AHRD V3.3 *** A0A2G2YA23_CAPAN)	TRUE
Solyc06g065050	3.13234	0.000519894	0.045481	Late embryogenesis abundant domain-containing protein / LEA domain-containing protein (AHRD V3.3 *** Q9C7H3_ARATH)	TRUE
Solyc06g084170	3.07564	1.03096e-07	0.000161677	Unknown protein	FALSE
Solyc06g065010	3.0031	2.75604e-06	0.00172882	GDSL esterase/lipase 2-like (AHRD V3.3 *** A0A2G2ZB04_CAPAN)	FALSE
Solyc03g025250	2.97299	6.77994e-05	0.0128322	Protein DETOXIFICATION (AHRD V3.3 *** A0A328E0F4_9ASTE)	FALSE
Solyc03g078360	2.97153	1.1578e-05	0.00403485	Receptor-like protein kinase (AHRD V3.3 *** A0A2U1PPA0_ARTAN)	FALSE
Solyc02g077340	2.92416	7.03279e-06	0.00305398	GDSL esterase/lipase (AHRD V3.3 *** A0A2G3BD38_CAPCH)	FALSE
Solyc07g006460	2.89206	0.000241538	0.0286647	Eukaryotic aspartyl protease family protein (AHRD V3.3 *** A0A2U1PYZ3_ARTAN)	TRUE
Solyc03g063100	2.85751	0.000322356	0.0326144	single flower truss	FALSE
Solyc01g091050	2.73634	4.45063e-06	0.00244284	GDSL esterase/lipase (AHRD V3.3 *** A0A2G3D5Q8_CAPCH)	TRUE
Solyc02g150119	2.73442	0.000158524	0.0221011	Heat-inducible transcription repressor (DUF639) (AHRD V3.3 *-* Q8VXZ2_ARATH)	TRUE
Solyc02g077810	2.6682	0.000213221	0.0264478	Ethylene-responsive transcription factor 4 (AHRD V3.3 *** A0A1U8FGJ1_CAPAN)	TRUE
Solyc01g007940	2.64535	6.34894e-06	0.00300553	Alanine aminotransferase 2 (AHRD V3.3 *** A0A2G2YVW4_CAPAN)	FALSE
Solyc08g078160	2.61214	2.11313e-05	0.00594791	Oleosin (AHRD V3.3 *** A0A1U8GG58_CAPAN)	FALSE
Solyc03g097870	2.5984	1.27075e-08	3.98561e-05	Zinc finger, C2H2 (AHRD V3.3 *** A0A2U1PE02_ARTAN)	FALSE
Solyc11g007050	2.58083	3.22294e-07	0.00037242	Protease inhibitor (AHRD V3.3 *** A0A2K3MP81_TRIPR)	FALSE
Solyc01g009510	2.5694	4.79777e-06	0.00250798	Abscisic acid responsive elements-binding factor 2 (AHRD V3.3 --* A0A1P8AV75_ARATH)	TRUE
Solyc01g008940	2.55512	1.01208e-08	3.98561e-05	Geranylgeranyl diphosphate synthase (AHRD V3.3 *** A0A223HEC2_CAMSI)	FALSE
Solyc06g072130	2.52655	0.000221024	0.0271094	tonoplast intrinsic protein 3.1	FALSE
Solyc01g081350	2.52305	2.35852e-06	0.00156913	Aspartic proteinase cdr1 (AHRD V3.3 *** A0A314KJZ9_NICAT)	FALSE
Solyc04g050623	2.49971	3.07573e-07	0.00037242	Membrane metalloprotease ARASP, chloroplastic (AHRD V3.3 *** A0A2G3AYX5_CAPCH)	FALSE
Solyc03g112440	2.48993	1.22499e-06	0.000996094	Oleosin (AHRD V3.3 *** A0A2G3A1E3_CAPAN)	TRUE
Solyc07g056290	2.48933	6.34899e-05	0.0123356	Pectin lyase-like superfamily protein (AHRD V3.3 *** A0A2U1KXQ2_ARTAN)	FALSE
Solyc11g072380	2.47385	4.00596e-06	0.00225515	Cupin_1 domain-containing protein (AHRD V3.3 *** A0A1Q3B294_CEPFO)	TRUE
Solyc02g088180	2.44183	1.07864e-05	0.00394691	NAC domain-containing protein (AHRD V3.3 *** A0A2G2V9A8_CAPBA)	TRUE
Solyc07g054940	2.39959	5.12536e-05	0.010636	2-oxoglutarate (2OG) and Fe(II)-dependent oxygenase superfamily protein (AHRD V3.3 *** A0A2U1MCV6_ARTAN)	FALSE
Solyc07g064790	2.37731	4.19426e-05	0.00939642	Threonine--tRNA ligase, cytoplasmic (AHRD V3.3 *-* A0A2G2WFC7_CAPBA)	TRUE
Solyc10g049940	2.36927	2.10082e-07	0.000288271	Unknown protein	FALSE
Solyc08g065590	2.31759	0.000144009	0.0208767	Vacuolar-processing enzyme (AHRD V3.3 *** A0A2G2ZDR1_CAPAN)	TRUE
Solyc07g150142	2.30528	8.37104e-05	0.0145862	Unknown protein	FALSE
Solyc09g091320	2.27555	3.88308e-05	0.00881237	Plant self-incompatibility S1 (AHRD V3.3 *-* A0A2U1LYE3_ARTAN)	FALSE
Solyc11g006950	2.25171	0.000142254	0.0208213	protein NRT1/ PTR FAMILY 2.7-like (AHRD V3.3 *** A0A2I4HW78_9ROSI)	FALSE
Solyc04g051280	2.25111	1.54445e-05	0.00498652	nucleolin (AHRD V3.3 *-* AT1G65090.3)	TRUE
Solyc09g011550	2.2342	0.000274602	0.0301572	Glutathione S-transferase (AHRD V3.3 *** C0LF68_CAPAN)	FALSE
Solyc01g098490	2.19452	0.000528205	0.0458369	Sugar facilitator protein 1	FALSE
Solyc08g066040	2.16982	1.22206e-05	0.00419224	Oleosin (AHRD V3.3 *** A0A2I4GNJ1_9ROSI)	FALSE
Solyc01g005180	2.16942	8.28377e-05	0.0145496	protein LITTLE ZIPPER 3 (AHRD V3.3 *-* A0A2I4E2N9_9ROSI)	TRUE
Solyc10g049370	2.16626	0.000322031	0.0326144	Pectinesterase (AHRD V3.3 *** A0A2G3A4H7_CAPAN)	FALSE
Solyc01g067330	2.16081	5.13511e-05	0.010636	CASP-like protein (AHRD V3.3 *** A0A2G3DII6_CAPCH)	FALSE
Solyc12g096930	2.15495	2.08176e-05	0.00593572	Peroxygenase (AHRD V3.3 *** A0A2G3B4S5_CAPCH)	TRUE
Solyc09g030370	2.14058	8.64133e-05	0.0148219	GDSL esterase/lipase (AHRD V3.3 *** A0A1U8E6M9_CAPAN)	FALSE
Solyc09g064750	2.12864	0.00056819	0.0485393	Unknown protein	FALSE
Solyc08g067640	2.11223	6.26207e-05	0.0122753	Unknown protein	FALSE
Solyc05g007770	2.10214	0.000420296	0.0391991	NAC domain TF	TRUE
Solyc02g087910	2.08601	8.06325e-06	0.00323744	Non-specific lipid-transfer protein (AHRD V3.3 *** K4BBU7_SOLLC)	FALSE
Solyc03g115300	2.05501	9.80688e-05	0.0159875	Expansin (AHRD V3.3 *** K4BL32_SOLLC)	FALSE
Solyc02g072290	2.04114	1.86341e-05	0.00560428	Subtilisin-like protease (AHRD V3.3 *** Q9LWA3_SOLLC)	TRUE
Solyc03g034336	2.02378	0.000522032	0.045481	Bifunctional inhibitor/lipid-transfer protein/seed storage 2S albumin superfamily protein (AHRD V3.3 *** A0A1I9LP30_ARATH)	FALSE
Solyc07g017970	2.02148	3.48507e-05	0.00822739	Thaumatin (AHRD V3.3 *** A0A2U1PDY4_ARTAN)	FALSE
Solyc01g104760	2.00883	1.75196e-05	0.00541752	Sequence-specific DNA binding transcription factor (AHRD V3.3 *** A0A2K3PC30_TRIPR)	TRUE
Solyc03g119850	1.98719	1.4401e-05	0.00471902	Protein decapping 5 (AHRD V3.3 *-* A0A2G3B6L4_CAPCH)	TRUE
Solyc01g087340	1.98022	2.22702e-05	0.00618913	tRNA-dihydrouridine synthase (AHRD V3.3 *-* A0A2G3AKC9_CAPAN)	FALSE
Solyc05g006465	1.97634	2.61355e-05	0.00691332	Unknown protein	FALSE
Solyc09g011100	1.96697	7.01388e-05	0.0129403	Plant self-incompatibility protein S1 family (AHRD V3.3 *** A0A2U1NP42_ARTAN)	FALSE
Solyc07g054920	1.96551	6.6981e-06	0.00300553	2-oxoglutarate (2OG) and Fe(II)-dependent oxygenase superfamily protein (AHRD V3.3 *** A0A2U1MCV6_ARTAN)	FALSE
Solyc10g012110	1.94222	6.63964e-06	0.00300553	non-specific lipid-transfer protein-like (AHRD V3.3 *** A0A1S4C1T6_TOBAC)	FALSE
Solyc08g006460	1.91008	0.00026382	0.0298063	RING/U-box superfamily protein (AHRD V3.3 *** A0A1P8BF19_ARATH)	TRUE
Solyc10g085540	1.87821	9.62971e-05	0.0159875	Subtilisin-like protease (AHRD V3.3 *** Q9LWA3_SOLLC)	TRUE
Solyc12g057020	1.86981	2.7599e-05	0.00712865	Sucrose synthase (AHRD V3.3 *** K4CEB3_SOLLC)	FALSE
Solyc03g111415	1.86449	1.88989e-05	0.00560709	Unknown protein	FALSE
Solyc11g020330	1.84515	3.45841e-05	0.00822739	leer-sHSP small heat shock protein	TRUE
Solyc10g075010	1.83379	0.000192193	0.024968	F-box protein (AHRD V3.3 *** A0A2K3P6V3_TRIPR)	FALSE
Solyc03g121350	1.8176	0.000207297	0.0258592	Anoctamin-like protein (AHRD V3.3 *** A0A2G2WPY2_CAPBA)	TRUE
Solyc11g062420	1.81376	3.96121e-06	0.00225515	SCR-like 11 (AHRD V3.3 -** AT4G15733.1)	FALSE
Solyc01g104380	1.81274	8.1102e-06	0.00323744	Chemocyanin (AHRD V3.3 *** A0A2G3CNC8_CAPCH)	FALSE
Solyc06g063060	1.81133	0.000298751	0.0313832	BnaC02g12160D protein (AHRD V3.3 *-* A0A078HTB1_BRANA)	TRUE
Solyc08g083510	1.80639	4.95082e-05	0.0105529	Cytochrome P450 (AHRD V3.3 *** A0A1U9X605_THAGA)	FALSE
Solyc10g012120	1.79706	6.62492e-07	0.000661137	non-specific lipid-transfer protein-like (AHRD V3.3 *** A0A1S4C1T6_TOBAC)	FALSE
Solyc11g065280	1.77078	3.92487e-08	7.83369e-05	beta-1,3-glucanase	FALSE
Solyc09g092145	1.76503	5.56345e-06	0.00271435	Unknown protein	FALSE
Solyc11g012370	1.76493	5.19458e-06	0.00259374	cysteine proteinase inhibitor A (AHRD V3.3 -** XP_002987167.2)	FALSE
Solyc12g056620	1.75085	0.000276588	0.0302114	Chlorophyll a/b binding protein domain-containing protein (AHRD V3.3 *-* A0A2U1PDX9_ARTAN)	TRUE
Solyc05g150107	1.74754	7.2333e-06	0.00305398	BnaA02g27450D protein (AHRD V3.3 -** A0A078I6H0_BRANA)	FALSE
Solyc04g072505	1.72619	7.25507e-05	0.0132737	Unknown protein	FALSE
Solyc03g034330	1.72506	2.02642e-05	0.00585394	Bifunctional inhibitor/lipid-transfer protein/seed storage 2S albumin superfamily protein (AHRD V3.3 *** A0A1I9LP30_ARATH)	FALSE
Solyc07g062360	1.70786	0.000338465	0.0336245	U1 small nuclear ribonucleoprotein C-like (AHRD V3.3 *** XP_010324445.2)	TRUE
Solyc00g500218	1.70329	0.00021491	0.0265076	Auxin-responsive GH3 family protein (AHRD V3.3 *** A0A2U1NZC8_ARTAN)	FALSE
Solyc12g010570	1.70217	0.000222683	0.0271611	Tetraspanin (AHRD V3.3 *** A0A200Q8V3_9MAGN)	FALSE
Solyc02g032140	1.685	9.57421e-05	0.0159875	Ninja (AHRD V3.3 *-* A0A200QVW0_9MAGN)	TRUE
Solyc06g069350	1.67758	1.38027e-06	0.00101013	Unknown protein	TRUE
Solyc06g068110	1.67428	5.0104e-07	0.000523826	cytochrome P450 family protein (AHRD V3.3 *** AT3G15760.1)	FALSE
Solyc06g054270	1.65755	3.12458e-05	0.00779546	Chlorophyll a-b binding protein, chloroplastic (AHRD V3.3 *** A0A2G3AWK5_CAPCH)	FALSE
Solyc01g010150	1.65333	2.51433e-05	0.00678567	ACT domain-containing protein (AHRD V3.3 *** A0A2U1MM44_ARTAN)	TRUE
Solyc05g047510	1.64797	1.84643e-05	0.00560428	Sulfotransferase (AHRD V3.3 *** A0A2G3B6Y2_CAPCH)	FALSE
Solyc07g061720	1.63054	0.000160715	0.0221011	death domain associated protein (AHRD V3.3 --* AT2G46735.1)	FALSE
Solyc09g089950	1.62897	2.97129e-06	0.00181207	Unknown protein	TRUE
Solyc11g043110	1.62745	8.09843e-05	0.0144554	GDSL esterase/lipase (AHRD V3.3 *** A0A2G3CYS5_CAPCH)	FALSE
Solyc09g015110	1.61334	0.000150156	0.0214069	Homeobox-leucine zipper protein ROC8 (AHRD V3.3 *-* A0A2I0VTB8_9ASPA)	FALSE
Solyc10g006380	1.60588	5.78439e-05	0.0118688	Ras-related small GTP-binding family protein (AHRD V3.3 *** A0A2U1P8S5_ARTAN)	FALSE
Solyc10g007510	1.59593	1.01467e-05	0.00377577	BTB/POZ domain-containing protein (AHRD V3.3 *** A0A2U1QE56_ARTAN)	FALSE
Solyc03g019750	1.59587	3.4706e-06	0.00205938	alpha-1,4-glucan-protein synthase [UDP-forming]-like (AHRD V3.3 *** A0A1S3YIZ3_TOBAC)	FALSE
Solyc05g006817	1.58731	0.000124894	0.0186891	Unknown protein	FALSE
Solyc08g065547	1.58273	4.71547e-06	0.00250798	Vacuolar-processing enzyme (AHRD V3.3 *** A0A2G2ZDR1_CAPAN)	TRUE
Solyc06g062540	1.57184	0.00043452	0.0399158	Auxin efflux carrier (AHRD V3.3 *** A0A200PYL2_9MAGN)	FALSE
Solyc10g005430	1.57006	7.6554e-06	0.00317121	Quinone reductase (AHRD V3.3 *** F8WQS4_NICBE)	FALSE
Solyc07g045140	1.54734	0.000283391	0.0305851	transmembrane protein (AHRD V3.3 *** AT4G12680.1)	TRUE
Solyc01g090520	1.54112	2.74745e-06	0.00172882	Unknown protein	FALSE
Solyc07g049540	1.53141	1.29849e-06	0.00100915	ABC transporter B family member 7 (AHRD V3.3 *-* A0A2G2XE24_CAPBA)	FALSE
Solyc11g010940	1.51567	0.000121922	0.0185065	Dof zinc finger protein (AHRD V3.3 *** A0A2K3P763_TRIPR)	TRUE
Solyc03g097590	1.50537	0.000162847	0.0222068	Unknown protein	FALSE
Solyc01g095780	1.49415	0.000125943	0.0186891	non-specific lipid-transfer protein-like (AHRD V3.3 *** A0A1S4D5K2_TOBAC)	FALSE
Solyc08g075060	1.49067	4.49208e-05	0.00976472	Pectin acetylesterase (AHRD V3.3 *** K4CMM4_SOLLC)	FALSE
Solyc01g081250	1.49031	0.000330877	0.0331708	Glutathione S-transferase (AHRD V3.3 *** A0A200PVK3_9MAGN)	FALSE
Solyc01g099910	1.48897	0.000421362	0.0391991	Alpha/beta-Hydrolases superfamily protein (AHRD V3.3 *** Q9M9W5_ARATH)	FALSE
Solyc08g083410	1.48224	0.000228541	0.0274953	Cytochrome P450 (AHRD V3.3 *** A0A1U9X605_THAGA)	FALSE
Solyc10g054673	1.46092	0.000192075	0.024968	Beta-1%2C3-N-Acetylglucosaminyltransferase family protein (AHRD V3.3 *** AT4G32090.1)	FALSE
Solyc05g009430	1.44489	1.67788e-05	0.00526254	Endonuclease 3 (AHRD V3.3 *** A0A2G3B636_CAPCH)	FALSE
Solyc07g053010	1.43963	0.000175956	0.0234632	Disease resistance protein (AHRD V3.3 *** A0A200QY03_9MAGN)	TRUE
Solyc01g081370	1.43181	0.000100654	0.0159875	aspartic proteinase CDR1-like (AHRD V3.3 *** A0A1U7UZK6_NICSY)	FALSE
Solyc08g076250	1.4301	0.000394818	0.0375248	Cytochrome (AHRD V3.3 *** A0A1U8F0H8_CAPAN)	FALSE
Solyc08g082780	1.42365	0.000264324	0.0298063	Unknown protein	TRUE
Solyc03g097730	1.41484	6.96153e-05	0.0129403	CASP-like protein (AHRD V3.3 *** A0A2I4FJL7_9ROSI)	FALSE
Solyc10g012130	1.41024	9.84772e-06	0.0037277	Non-specific lipid-transfer protein (AHRD V3.3 *** A0A1J6IRB3_NICAT)	FALSE
Solyc04g078110	1.40774	0.000285371	0.0305851	serine protease SBT1	TRUE
Solyc10g086100	1.38001	0.000574632	0.0487937	Proteinase inhibitor I-B (AHRD V3.3 *** A0A1U8EBY9_CAPAN)	FALSE
Solyc01g106040	1.37751	7.45547e-07	0.000711674	GATA transcription factor 24 (AHRD V3.3 *** A0A2G3AWR4_CAPCH)	TRUE
Solyc09g057883	1.3637	3.2853e-05	0.00796016	Sulfotransferase (AHRD V3.3 *-* A0A2G3B6Y2_CAPCH)	FALSE
Solyc07g150139	1.35048	0.000174482	0.0234632	defensin-like protein 182 (AHRD V3.3 -** XP_011080983.1)	FALSE
Solyc04g014790	1.34393	3.72772e-05	0.0087066	Cysteine proteinase inhibitor (AHRD V3.3 *** A0A2G3CDP4_CAPCH)	FALSE
Solyc01g079530	1.3439	3.7888e-05	0.00875611	RING/FYVE/PHD zinc finger superfamily protein (AHRD V3.3 *** A0A2U1LZL6_ARTAN)	TRUE
Solyc11g032060	1.34033	4.74963e-05	0.0102233	GDSL esterase/lipase (AHRD V3.3 *** A0A2G2VM87_CAPBA)	TRUE
Solyc01g100880	1.32109	8.52366e-05	0.0147352	WAT1-related protein (AHRD V3.3 *** K4B1B9_SOLLC)	FALSE
Solyc02g072050	1.31826	0.000100422	0.0159875	xyloglucan endotransglucosylase-hydrolase 2	TRUE
Solyc01g087420	1.31251	6.66237e-05	0.0127193	Zinc finger, FYVE/PHD-type (AHRD V3.3 *** A0A2U1NX02_ARTAN)	TRUE
Solyc09g010940	1.3101	1.96553e-06	0.00139204	Haloacid dehalogenase-like hydrolase (HAD) superfamily protein (AHRD V3.3 *** A0A1P8BF18_ARATH)	TRUE
Solyc09g083170	1.30759	0.000106126	0.0166429	Unknown protein	FALSE
Solyc04g072034	1.28141	0.000285582	0.0305851	NAD(P)-binding Rossmann-fold superfamily protein (AHRD V3.3 *** Q9SZ91_ARATH)	FALSE
Solyc10g083395	1.27535	4.36547e-05	0.00968119	Unknown protein	FALSE
Solyc01g009430	1.26926	0.000109811	0.0169782	Protein EXORDIUM-like 1 (AHRD V3.3 *-* A0A2G2ZQI6_CAPAN)	TRUE
Solyc01g096070	1.25791	0.000280111	0.0304447	Auxin Response Factor 18	TRUE
Solyc08g083500	1.2417	0.000537293	0.0462598	Cytochrome P450 (AHRD V3.3 *** A0A2U1QKU8_ARTAN)	FALSE
Solyc05g050010	1.24049	0.000598231	0.0497506	1-aminocyclopropane-1-carboxylic acid synthase-4	FALSE
Solyc07g065670	1.22252	0.000439856	0.0402377	Cellulose synthase-like protein E1 (AHRD V3.3 *-* A0A2G3C2E8_CAPCH)	TRUE
Solyc08g008410	1.22048	0.000307505	0.031548	Plant regulator RWP-RK family protein (AHRD V3.3 *** G7IAL8_MEDTR)	TRUE
Solyc03g098750	1.21461	0.000261911	0.0298063	Unknown protein	TRUE
Solyc08g067990	1.20162	0.000289431	0.0306979	Subtilisin-like protease (AHRD V3.3 *** A0A1J3GF32_NOCCA)	FALSE
Solyc04g007310	1.19623	0.000580058	0.0487937	Thaumatin (AHRD V3.3 *** A0A2U1PDY4_ARTAN)	FALSE
Solyc01g102960	1.16777	9.95651e-05	0.0159875	22.0 kDa class IV heat shock protein (AHRD V3.3 *** A0A2G3ATG3_CAPCH)	TRUE
Solyc11g066520	1.14791	0.000389763	0.0372054	Carboxypeptidase (AHRD V3.3 *** A0A2G2YH94_CAPAN)	FALSE
Solyc02g032100	1.14531	5.19812e-06	0.00259374	Zinc transporter protein (AHRD V3.3 *** A5BDR3_VITVI)	TRUE
Solyc08g061920	1.13391	1.12034e-05	0.0040323	Copper transporter (AHRD V3.3 *** E9LK44_VITVI)	FALSE
Solyc01g099590	1.11855	0.00020291	0.0256029	glutathione-S-transferase	FALSE
Solyc01g081060	1.11192	0.000264734	0.0298063	Solyc01g081060	TRUE
Solyc01g106990	1.10586	0.000520544	0.045481	Endo-1,4-beta-xylanase (AHRD V3.3 *** A0A1J3CP06_NOCCA)	FALSE
Solyc06g054400	1.10523	0.000593007	0.0496926	Eukaryotic translation initiation factor 5B (AHRD V3.3 *** A0A2G2WJG0_CAPBA)	TRUE
Solyc03g121850	1.08065	6.00198e-05	0.0120638	hypothetical protein (AHRD V3.3 *-* AT1G05950.4)	FALSE
Solyc02g068620	1.07921	8.90834e-05	0.0150448	Unknown protein	FALSE
Solyc02g072040	1.05078	0.000191318	0.024968	calcium/calcium/calmodulin-dependent Serine/Threonine-kinase (AHRD V3.3 *** AT2G47010.2)	TRUE
Solyc07g054060	1.04967	0.000193853	0.0250237	hypothetical protein (AHRD V3.3 --* AT4G28290.2)	FALSE
Solyc07g005190	1.04223	0.00030492	0.031548	Lysosomal Pro-X carboxypeptidase (AHRD V3.3 *** A0A1J3DVN3_NOCCA)	FALSE
Solyc09g011470	1.01448	0.000430001	0.0396667	Plant/T7H20-70 protein (AHRD V3.3 *-* G7L5L0_MEDTR)	TRUE

## Sheet: DOWN
Supplemental Table S8. Down-regulated DEGs of E3 vs W3 in fruit (log2 fold change ≦ -1.0, p_value < 0.05, p_adj < 0.05).
Geneid	log2FoldChange	p_value	p_adj	Annotation
Solyc08g078030	-3.86043	0.000246284	0.0287615	Transferase domain-containing protein (AHRD V3.3 *** A0A1Q3BID0_CEPFO)
Solyc09g091550	-3.71186	1.18247e-08	3.98561e-05	S-adenosyl-L-methionine-dependent methyltransferases superfamily protein (AHRD V3.3 *** A0A2U1PMX3_ARTAN)
Solyc08g008280	-3.359	0.000546915	0.0469044	WRKY transcription factor 53
Solyc06g068040	-2.75774	0.000194901	0.0250237	Pectin lyase-like superfamily protein (AHRD V3.3 *** A0A2U1NJW4_ARTAN)
Solyc04g007825	-2.27786	0.000378264	0.0364293	Kirola (AHRD V3.3 *** A0A1U8GVS3_CAPAN)
Solyc06g008890	-2.10699	0.000536736	0.0462598	Receptor-like protein kinase (AHRD V3.3 *** A0A2K3LJ85_TRIPR)
Solyc07g006380	-1.96032	0.000476507	0.0427009	Defensin-like protein (AHRD V3.3 *** A0A1U8HFN5_CAPAN)
Solyc03g006830	-1.64017	0.000198837	0.0253806	MADS-box transcription factor (AHRD V3.3 *** Q1EMR8_PLAMJ)
Solyc10g007870	-1.62399	4.44879e-05	0.00976472	Tumor-related protein (AHRD V3.3 *** Q40447_9SOLA)
Solyc04g082030	-1.18683	0.000402327	0.0380737	ornithine decarboxylase
Solyc02g071520	-1.16802	3.89342e-05	0.00881237	Bidirectional sugar transporter SWEET (AHRD V3.3 *** M1AAY0_SOLTU)
Solyc02g092760	-1.06019	0.000371997	0.036138	Sigma-B regulation protein RsbQ (AHRD V3.3 *** A0A2T0KZ78_9BURK)
