# Supplementary material for: Application of ethanol alleviates heat damage to leaf growth and yield in tomato
Source: Front Plant Sci. 2024 Feb 19;15:1325365. doi: 10.3389/fpls.2024.1325365 (PMC10909983; doi:10.3389/fpls.2024.1325365)
Supplement: Supplementary file 10 [file Table_9.xlsx]

## Sheet: UP
Supplemental Table S9. Up-regulated DEGs of E3 vs W3 in leaf at green fruit stage (log2 fold change ≧ 1.0, p_value < 0.05, p_adj < 0.05).
GeneID	log2FoldChange	p_value	p_adj	Annotation
Solyc03g033500.ITAG4.0	1.76401	4.99872e-09	4.29865e-05	Cold-shock protein (AHRD V3.3 *-* A0A200RAC1_9MAGN)
Solyc12g098490.ITAG4.0	1.59048	4.22659e-06	0.0103847	Serine hydroxymethyltransferase (AHRD V3.3 *** A0A2G3CI35_CAPCH)
Solyc08g007800.ITAG4.0	1.51479	2.1928e-05	0.037714	DnaJ homolog (AHRD V3.3 *** Q9ZWK3_SALGI)
Solyc05g012590.ITAG4.0	1.27005	3.72199e-07	0.00146654	Ankyrin repeat (AHRD V3.3 *** A0A200PR78_9MAGN)

## Sheet: DOWN
Supplemental Table S9. Down-regulated DEGs of E3 vs W3 in leaf at green fruit stage (log2 fold change ≦ -1.0, p_value < 0.05, p_adj < 0.05).
GeneID	log2FoldChange	p_value	p_adj	Annotation
gene:Solyc05g056620.2.ITAG4.0	-4.98826	2.22938e-32	3.8343e-28	macrocalyx
gene:Solyc08g078700.2.ITAG4.0	-1.74508	3.12859e-05	0.0413913	mitochondrial small heat shock protein
Solyc01g111550.ITAG4.0	-1.53985	2.51053e-05	0.0392533	protein MCM10 homolog (AHRD V3.3 *** A0A2I4EWG7_9ROSI)
