# Supplementary material for: Application of ethanol alleviates heat damage to leaf growth and yield in tomato
Source: Front Plant Sci. 2024 Feb 19;15:1325365. doi: 10.3389/fpls.2024.1325365 (PMC10909983; doi:10.3389/fpls.2024.1325365)
Supplement: Supplementary file 11 [file Table_10.xlsx]

## Sheet: S10
	Supplemental Table S10. GO terms enriched in up-regulated DEGs of E3day vs W3day in shoots.
	GO terms	Fold enrichment	FDR
	Biological process
	translational elongation (GO:0006414)	33.1	0.00361
	leaf development (GO:0048366)	5.17	0.0161
	amide metabolic process (GO:0043603)	4.54	0.0167
	regulation of defense response (GO:0031347)	4.38	0.00591
	regulation of response to stress (GO:0080134)	4.12	0.00509
	response to osmotic stress (GO:0006970)	3.97	0.00669
	response to alcohol (GO:0097305)	3.9	0.00213
	cellular catabolic process (GO:0044248)	3.88	0.0081
	response to water deprivation (GO:0009414)	3.87	0.00303
	response to water (GO:0009415)	3.79	0.00273
	response to acid chemical (GO:0001101)	3.7	0.00331
	cellular response to oxygen-containing compound (GO:1901701)	3.59	0.00859
	response to abscisic acid (GO:0009737)	3.55	0.0166
	response to salt (GO:1902074)	3.51	0.00396
	regulation of response to stimulus (GO:0048583)	3.5	0.00392
	response to oxygen-containing compound (GO:1901700)	3.19	1.11e-06
	cellular response to chemical stimulus (GO:0070887)	3.03	0.00311
	cellular response to organic substance (GO:0071310)	2.94	0.034
	response to lipid (GO:0033993)	2.93	0.000689
	response to hormone (GO:0009725)	2.73	0.00334
	response to inorganic substance (GO:0010035)	2.73	0.0125
	response to endogenous stimulus (GO:0009719)	2.7	0.00316
	response to organic substance (GO:0010033)	2.69	4.13e-06
	response to chemical (GO:0042221)	2.49	3.92e-06
	response to abiotic stimulus (GO:0009628)	2.25	0.00186
	response to stress (GO:0006950)	2.18	0.000445
	response to stimulus (GO:0050896)	1.72	0.00191
	Molecular function
	translation elongation factor activity (GO:0003746)	75.93	0.00159
	Cellular component
	Not found

## Sheet: S11
	Supplemental Table S11. GO terms enriched in down-regulated DEGs of E3day vs W3day in shoots.
	GO terms	Fold enrichment	FDR
	Biological process
	response to light intensity (GO:0009642)	12.62	0.0498
	response to temperature stimulus (GO:0009266)	5.98	0.0517
	response to radiation (GO:0009314)	4.65	0.0164
	response to abiotic stimulus (GO:0009628)	3.51	0.00193
	response to stimulus (GO:0050896)	2.31	0.00169
	Molucular function
	Not found
	Cellular component
	thylakoid (GO:0009579)	10.73	0.0167
	Molecular function
	Cellular component
	Not found

## Sheet: S12
	Supplemental Table S12. GO terms enriched in up-regulated DEGs of E3day vs W3day in roots.
	GO terms	Fold enrichment	FDR
	Biological process
	gibberellin catabolic process (GO:0045487)	37.78	0.0168
	diterpenoid catabolic process (GO:0016103)	37.78	0.0164
	negative regulation of DNA recombination (GO:0045910)	24.45	0.039
	oxylipin biosynthetic process (GO:0031408)	24.09	0.00622
	oxylipin metabolic process (GO:0031407)	22.17	0.00789
	gibberellin metabolic process (GO:0009685)	16.79	0.0177
	cellular response to hypoxia (GO:0071456)	12.75	6.77e-14
	cellular response to decreased oxygen levels (GO:0036294)	12.65	3.98e-14
	cellular response to oxygen levels (GO:0071453)	12.59	3.46e-14
	response to hypoxia (GO:0001666)	10.1	4.64e-14
	response to decreased oxygen levels (GO:0036293)	9.81	4.36e-14
	response to oxygen levels (GO:0070482)	9.76	4.23e-14
	organic acid catabolic process (GO:0016054)	5.61	0.0362
	carboxylic acid catabolic process (GO:0046395)	5.61	0.0355
	cellular response to stress (GO:0033554)	4.32	2.54e-11
	response to oxidative stress (GO:0006979)	3.54	0.000551
	cellular response to chemical stimulus (GO:0070887)	3.19	1.92e-10
	response to fungus (GO:0009620)	3.15	4.48e-05
	cellular catabolic process (GO:0044248)	3.08	0.0003
	defense response to fungus (GO:0050832)	2.98	0.00316
	response to osmotic stress (GO:0006970)	2.62	0.0146
	defense response to other organism (GO:0098542)	2.59	2.19e-06
	response to external biotic stimulus (GO:0043207)	2.59	1.46e-07
	response to other organism (GO:0051707)	2.59	1.36e-07
	response to biotic stimulus (GO:0009607)	2.58	1.32e-07
	biological process involved in interspecies interaction between organisms (GO:0044419)	2.57	1.42e-07
	carboxylic acid metabolic process (GO:0019752)	2.57	0.000688
	defense response (GO:0006952)	2.54	4.91e-07
	seed development (GO:0048316)	2.48	0.0143
	reproductive structure development (GO:0048608)	2.42	0.000228
	reproductive system development (GO:0061458)	2.41	0.000223
	fruit development (GO:0010154)	2.38	0.0279
	post-embryonic development (GO:0009791)	2.35	9.22e-05
	response to stress (GO:0006950)	2.33	2.05e-14
	response to water deprivation (GO:0009414)	2.33	0.0426
	cellular response to stimulus (GO:0051716)	2.3	4.77e-08
	response to external stimulus (GO:0009605)	2.3	1.81e-06
	response to bacterium (GO:0009617)	2.27	0.03
	response to water (GO:0009415)	2.24	0.0438
	oxoacid metabolic process (GO:0043436)	2.22	0.00315
	response to oxygen-containing compound (GO:1901700)	2.22	2.61e-06
	response to chemical (GO:0042221)	2.22	2.54e-11
	developmental process involved in reproduction (GO:0003006)	2.2	0.00102
	organic acid metabolic process (GO:0006082)	2.17	0.00482
	response to inorganic substance (GO:0010035)	2.15	0.00364
	response to abiotic stimulus (GO:0009628)	2.08	2.07e-07
	response to hormone (GO:0009725)	1.98	0.00613
	response to endogenous stimulus (GO:0009719)	1.96	0.00675
	response to organic substance (GO:0010033)	1.91	4.12e-05
	reproductive process (GO:0022414)	1.9	0.0202
	reproduction (GO:0000003)	1.89	0.0217
	response to lipid (GO:0033993)	1.86	0.0252
	response to stimulus (GO:0050896)	1.77	4.29e-12
	system development (GO:0048731)	1.73	0.0147
	multicellular organism development (GO:0007275)	1.59	0.042
	cellular metabolic process (GO:0044237)	1.37	0.039
	metabolic process (GO:0008152)	1.28	0.0291
	cellular process (GO:0009987)	1.24	0.0168
	Molecular function
	UDP-glucosyltransferase activity (GO:0035251)	6.97	0.03
	Cellular component
	Not found

## Sheet: S13
	Supplemental Table S13. GO terms enriched in down-regulated DEGs of E3day vs W3day in roots.
	GO terms	Fold enrichment	FDR
	Biological process
	response to oxidative stress (GO:0006979)	4.52	0.00174
	Molecular function
	lactoperoxidase activity (GO:0140825)	18.42	0.000644
	peroxidase activity (GO:0004601)	12.56	0.00242
	oxidoreductase activity, acting on peroxide as acceptor (GO:0016684)	11.91	0.00253
	antioxidant activity (GO:0016209)	11.61	0.00118
	heme binding (GO:0020037)	5.85	0.00219
	tetrapyrrole binding (GO:0046906)	5.43	0.00374
	oxidoreductase activity (GO:0016491)	3.03	0.00251
	Cellular component
	plant-type cell wall (GO:0009505)	5.65	0.0001
	cell wall (GO:0005618)	5.47	7.46e-05
	external encapsulating structure (GO:0030312)	5.24	8.53e-05
	extracellular region (GO:0005576)	2.25	0.000738
	cell periphery (GO:0071944)	2	0.0106
	Molecular function
	Cellular component
	Not found

## Sheet: S14
	Supplemental Table S14. GO terms enriched in up-regulated DEGs of E3day_H30min vs W3day_H30min in shoots.
	GO terms	Fold enrichment	FDR
	Biological process
	response to xenobiotic stimulus (GO:0009410)	28.93	0.0146
	systemic acquired resistance, salicylic acid mediated signaling pathway (GO:0009862)	18.27	0.00679
	fatty acid beta-oxidation (GO:0006635)	11.73	0.00622
	fatty acid oxidation (GO:0019395)	10.59	0.00903
	response to ozone (GO:0010193)	10.52	0.0346
	lipid oxidation (GO:0034440)	10.21	0.00283
	fatty acid catabolic process (GO:0009062)	10.09	0.0109
	monocarboxylic acid catabolic process (GO:0072329)	8.27	0.00745
	red or far-red light signaling pathway (GO:0010017)	8.04	0.0249
	cellular response to red or far red light (GO:0071489)	7.36	0.0343
	lipid modification (GO:0030258)	7.15	0.0051
	regulation of reactive oxygen species metabolic process (GO:2000377)	6.68	0.0494
	salicylic acid mediated signaling pathway (GO:0009863)	6.27	0.0245
	regulation of seed germination (GO:0010029)	6.2	0.0105
	organic acid catabolic process (GO:0016054)	6.02	0.00014
	carboxylic acid catabolic process (GO:0046395)	6.02	0.000138
	regulation of seedling development (GO:1900140)	5.9	0.0138
	response to UV (GO:0009411)	5.51	0.00835
	amino acid catabolic process (GO:0009063)	5.48	0.0435
	abscisic acid-activated signaling pathway (GO:0009738)	5.31	0.0046
	leaf senescence (GO:0010150)	5.31	9.25e-06
	response to reactive oxygen species (GO:0000302)	5.17	0.00248
	cellular response to salicylic acid stimulus (GO:0071446)	4.86	0.0345
	small molecule catabolic process (GO:0044282)	4.78	0.000515
	plant organ senescence (GO:0090693)	4.76	1.71e-05
	response to gibberellin (GO:0009739)	4.75	0.0382
	cellular response to hypoxia (GO:0071456)	4.72	0.000569
	cellular response to decreased oxygen levels (GO:0036294)	4.68	0.000611
	cellular response to oxygen levels (GO:0071453)	4.66	0.000621
	cellular response to light stimulus (GO:0071482)	4.27	0.0178
	cellular response to fatty acid (GO:0071398)	4.2	0.0193
	response to decreased oxygen levels (GO:0036293)	4.18	0.000134
	response to oxygen levels (GO:0070482)	4.16	0.000141
	cellular response to radiation (GO:0071478)	4.13	0.0214
	cellular response to environmental stimulus (GO:0104004)	4.12	0.00189
	cellular response to abiotic stimulus (GO:0071214)	4.12	0.00186
	response to hypoxia (GO:0001666)	4.05	0.00036
	cellular response to abscisic acid stimulus (GO:0071215)	3.96	0.0154
	cellular response to alcohol (GO:0097306)	3.96	0.0153
	response to salicylic acid (GO:0009751)	3.95	7.72e-05
	leaf development (GO:0048366)	3.55	3.62e-05
	response to water deprivation (GO:0009414)	3.33	2.66e-10
	response to abscisic acid (GO:0009737)	3.31	1.61e-09
	response to water (GO:0009415)	3.25	1.39e-10
	response to acid chemical (GO:0001101)	3.17	2.61e-10
	hormone-mediated signaling pathway (GO:0009755)	3.11	7.52e-06
	response to alcohol (GO:0097305)	3.08	5.08e-09
	response to salt (GO:1902074)	3.07	4.69e-10
	regulation of signal transduction (GO:0009966)	3.07	0.00608
	cellular catabolic process (GO:0044248)	3.05	4.67e-07
	cellular response to lipid (GO:0071396)	3.01	3.21e-05
	regulation of signaling (GO:0023051)	2.99	0.00781
	cellular response to oxygen-containing compound (GO:1901701)	2.97	1.15e-07
	response to red or far red light (GO:0009639)	2.96	0.0185
	regulation of cell communication (GO:0010646)	2.94	0.00894
	phyllome development (GO:0048827)	2.93	4.75e-05
	response to osmotic stress (GO:0006970)	2.88	6.87e-06
	cellular response to hormone stimulus (GO:0032870)	2.85	3.48e-06
	response to fatty acid (GO:0070542)	2.82	0.000919
	response to salt stress (GO:0009651)	2.81	0.000948
	response to oxidative stress (GO:0006979)	2.8	0.000661
	cellular response to organic substance (GO:0071310)	2.79	7.48e-09
	cellular response to endogenous stimulus (GO:0071495)	2.77	6.85e-06
	cellular response to chemical stimulus (GO:0070887)	2.73	4.5e-11
	response to oxygen-containing compound (GO:1901700)	2.7	3.87e-19
	response to jasmonic acid (GO:0009753)	2.7	0.00345
	regulation of post-embryonic development (GO:0048580)	2.68	0.0294
	response to inorganic substance (GO:0010035)	2.62	1.46e-10
	monocarboxylic acid metabolic process (GO:0032787)	2.61	0.00512
	response to hormone (GO:0009725)	2.58	1.51e-12
	response to lipid (GO:0033993)	2.58	1.12e-12
	reproductive shoot system development (GO:0090567)	2.56	0.0233
	response to endogenous stimulus (GO:0009719)	2.55	3.39e-12
	response to cold (GO:0009409)	2.53	0.014
	defense response to fungus (GO:0050832)	2.52	0.00108
	response to bacterium (GO:0009617)	2.47	3.15e-05
	regulation of defense response (GO:0031347)	2.45	0.00445
	positive regulation of cellular biosynthetic process (GO:0031328)	2.45	0.0347
	positive regulation of biosynthetic process (GO:0009891)	2.44	0.0271
	defense response to bacterium (GO:0042742)	2.44	0.000662
	response to organic substance (GO:0010033)	2.43	1.06e-19
	response to organic cyclic compound (GO:0014070)	2.43	0.00243
	response to fungus (GO:0009620)	2.42	0.0004
	regulation of response to stimulus (GO:0048583)	2.41	3.48e-05
	response to wounding (GO:0009611)	2.39	0.00393
	regulation of response to stress (GO:0080134)	2.39	0.00214
	shoot system development (GO:0048367)	2.35	3.97e-05
	response to chemical (GO:0042221)	2.25	4.2e-19
	positive regulation of cellular metabolic process (GO:0031325)	2.21	0.0438
	response to external biotic stimulus (GO:0043207)	2.17	4.5e-07
	response to other organism (GO:0051707)	2.17	4.31e-07
	positive regulation of cellular process (GO:0048522)	2.17	0.0145
	response to biotic stimulus (GO:0009607)	2.17	4.26e-07
	carboxylic acid metabolic process (GO:0019752)	2.17	0.000606
	biological process involved in interspecies interaction between organisms (GO:0044419)	2.16	4.63e-07
	organic acid metabolic process (GO:0006082)	2.16	1.69e-05
	cellular response to stress (GO:0033554)	2.14	0.00856
	signal transduction (GO:0007165)	2.1	3.23e-05
	response to external stimulus (GO:0009605)	2.06	3e-07
	regulation of DNA-templated transcription (GO:0006355)	2.06	2.52e-05
	regulation of RNA biosynthetic process (GO:2001141)	2.05	2.6e-05
	positive regulation of biological process (GO:0048518)	2.05	0.00227
	defense response to other organism (GO:0098542)	2.04	7.47e-05
	signaling (GO:0023052)	2.04	7.4e-05
	response to abiotic stimulus (GO:0009628)	2.03	2.61e-11
	cell communication (GO:0007154)	2.03	3.1e-05
	oxoacid metabolic process (GO:0043436)	2.03	0.000394
	response to stress (GO:0006950)	1.99	2.06e-13
	cellular response to stimulus (GO:0051716)	1.96	1.68e-07
	defense response (GO:0006952)	1.96	7.44e-05
	regulation of biosynthetic process (GO:0009889)	1.93	2.09e-05
	catabolic process (GO:0009056)	1.92	0.000906
	regulation of macromolecule biosynthetic process (GO:0010556)	1.91	0.00014
	regulation of cellular metabolic process (GO:0031323)	1.91	2.01e-06
	regulation of nucleobase-containing compound metabolic process (GO:0019219)	1.9	3.91e-05
	regulation of cellular biosynthetic process (GO:0031326)	1.88	0.000129
	regulation of RNA metabolic process (GO:0051252)	1.88	0.000241
	small molecule metabolic process (GO:0044281)	1.82	0.000238
	regulation of primary metabolic process (GO:0080090)	1.81	2.5e-05
	post-embryonic development (GO:0009791)	1.8	0.00429
	regulation of nitrogen compound metabolic process (GO:0051171)	1.77	7.77e-05
	reproductive structure development (GO:0048608)	1.77	0.0179
	reproductive system development (GO:0061458)	1.76	0.0178
	plant organ development (GO:0099402)	1.75	0.014
	organic substance catabolic process (GO:1901575)	1.75	0.0354
	response to light stimulus (GO:0009416)	1.73	0.0177
	response to radiation (GO:0009314)	1.69	0.0312
	regulation of gene expression (GO:0010468)	1.68	0.000667
	regulation of metabolic process (GO:0019222)	1.66	3.12e-05
	response to stimulus (GO:0050896)	1.66	5.07e-14
	regulation of cellular process (GO:0050794)	1.66	8.14e-07
	multicellular organism development (GO:0007275)	1.64	0.000131
	system development (GO:0048731)	1.63	0.00132
	regulation of macromolecule metabolic process (GO:0060255)	1.58	0.00216
	multicellular organismal process (GO:0032501)	1.55	0.00102
	regulation of biological process (GO:0050789)	1.53	9.75e-07
	biological regulation (GO:0065007)	1.51	5.79e-07
	anatomical structure development (GO:0048856)	1.51	0.000799
	developmental process (GO:0032502)	1.49	0.000563
	cellular process (GO:0009987)	1.28	1.81e-06
	cellular metabolic process (GO:0044237)	1.28	0.0273
	Molecular function
	translation elongation factor activity (GO:0003746)	20.42	0.0252
	transcription regulatory region nucleic acid binding (GO:0001067)	2.59	0.00174
	transcription cis-regulatory region binding (GO:0000976)	2.59	0.00149
	sequence-specific double-stranded DNA binding (GO:1990837)	2.54	0.0019
	DNA-binding transcription factor activity (GO:0003700)	2.43	0.000132
	sequence-specific DNA binding (GO:0043565)	2.38	0.00205
	double-stranded DNA binding (GO:0003690)	2.35	0.00488
	transcription regulator activity (GO:0140110)	2.32	0.000131
	DNA binding (GO:0003677)	2.12	0.00216
	protein binding (GO:0005515)	1.58	0.000552
	binding (GO:0005488)	1.32	0.00429
	Cellular component
	nucleus (GO:0005634)	1.3	0.0219
	intracellular anatomical structure (GO:0005622)	1.13	0.00107

## Sheet: S15
	Supplemental Table S15. GO terms enriched in down-regulated DEGs of E3day_H30min vs W3day_H30min in shoots.
	GO terms	Fold enrichment	FDR
	Biological process
	photosynthesis, light harvesting in photosystem I (GO:0009768)	13.29	0.0479
	cell wall pectin metabolic process (GO:0052546)	11.58	0.0185
	photosynthesis, light harvesting (GO:0009765)	8.88	0.049
	pectin biosynthetic process (GO:0045489)	7.98	0.00888
	chlorophyll biosynthetic process (GO:0015995)	7.23	0.0137
	porphyrin-containing compound biosynthetic process (GO:0006779)	6.29	0.0275
	photosynthesis, light reaction (GO:0019684)	6.02	0.000165
	photosynthesis (GO:0015979)	5.85	2.26e-06
	tetrapyrrole biosynthetic process (GO:0033014)	5.68	0.00898
	tetrapyrrole metabolic process (GO:0033013)	5.09	9.37e-06
	porphyrin-containing compound metabolic process (GO:0006778)	5.05	3.89e-05
	pectin metabolic process (GO:0045488)	4.89	0.00573
	galacturonan metabolic process (GO:0010393)	4.86	0.00581
	polysaccharide biosynthetic process (GO:0000271)	3.82	0.0107
	post-embryonic plant morphogenesis (GO:0090698)	3.79	0.0337
	cell wall macromolecule metabolic process (GO:0044036)	3.79	0.0329
	translation (GO:0006412)	3.75	9.06e-06
	peptide biosynthetic process (GO:0043043)	3.71	1.04e-05
	peptide metabolic process (GO:0006518)	3.5	2.57e-05
	amide biosynthetic process (GO:0043604)	3.41	2.5e-05
	carbohydrate biosynthetic process (GO:0016051)	3.31	0.00895
	generation of precursor metabolites and energy (GO:0006091)	3.13	0.0139
	polysaccharide metabolic process (GO:0005976)	3.01	0.00428
	amide metabolic process (GO:0043603)	3.01	0.000131
	response to light intensity (GO:0009642)	2.95	0.0355
	response to cold (GO:0009409)	2.58	0.0123
	carbohydrate metabolic process (GO:0005975)	2.46	0.000903
	macromolecule biosynthetic process (GO:0009059)	2.41	4.66e-09
	organonitrogen compound biosynthetic process (GO:1901566)	2.39	2.27e-06
	cell wall organization or biogenesis (GO:0071554)	2.35	0.0036
	response to radiation (GO:0009314)	2.31	7.57e-08
	cellular nitrogen compound biosynthetic process (GO:0044271)	2.28	6.96e-06
	response to light stimulus (GO:0009416)	2.19	4.43e-06
	organic substance biosynthetic process (GO:1901576)	1.97	5.78e-10
	growth (GO:0040007)	1.95	0.0251
	biosynthetic process (GO:0009058)	1.92	4.34e-10
	response to abiotic stimulus (GO:0009628)	1.72	4.66e-06
	cellular biosynthetic process (GO:0044249)	1.72	0.000727
	macromolecule metabolic process (GO:0043170)	1.39	0.000438
	cellular metabolic process (GO:0044237)	1.38	0.000172
	response to stimulus (GO:0050896)	1.37	0.00012
	cellular process (GO:0009987)	1.36	3.19e-11
	organic substance metabolic process (GO:0071704)	1.33	2.09e-05
	metabolic process (GO:0008152)	1.33	4.58e-06
	primary metabolic process (GO:0044238)	1.28	0.0114
	Molecular function
	structural constituent of ribosome (GO:0003735)	4.64	5.8e-05
	structural molecule activity (GO:0005198)	3.99	4.04e-05
	mRNA binding (GO:0003729)	2.32	0.0088
	Cellular component
	Not found

## Sheet: S16
	Supplemental Table S16. GO terms enriched in up-regulated DEGs of E3day_H30min vs W3day_H30min in roots.
	GO terms	Fold enrichment	FDR
	Biological process
	suberin biosynthetic process (GO:0010345)	41.22	0.0139
	cutin-based cuticle development (GO:0160062)	21.09	0.0387
	cellular aldehyde metabolic process (GO:0006081)	18.14	0.0487
	phenylpropanoid biosynthetic process (GO:0009699)	14.17	0.0114
	phenylpropanoid metabolic process (GO:0009698)	13.22	0.00868
	secondary metabolic process (GO:0019748)	4.02	0.0172
	lipid metabolic process (GO:0006629)	2.92	0.0223
	carboxylic acid metabolic process (GO:0019752)	2.76	0.0336
	organic acid metabolic process (GO:0006082)	2.5	0.0255
	oxoacid metabolic process (GO:0043436)	2.43	0.0453
	response to stress (GO:0006950)	1.81	0.0293
	response to stimulus (GO:0050896)	1.51	0.0345
	Molecular function
	sn-2-glycerol-3-phosphate omega-OH-C22:0-CoA acyl transferase activity (GO:0102419)	> 100	0.0414
	quercetin 3-O-glucosyltransferase activity (GO:0080043)	15.53	0.02
	UDP-glucosyltransferase activity (GO:0035251)	8.87	0.0205
	glucosyltransferase activity (GO:0046527)	7.05	0.0358
	UDP-glycosyltransferase activity (GO:0008194)	6.32	0.027
	heme binding (GO:0020037)	5.5	0.0312
	tetrapyrrole binding (GO:0046906)	5.1	0.0342
	oxidoreductase activity (GO:0016491)	3.32	0.00453
	catalytic activity (GO:0003824)	1.63	0.0176
	Cellular component
	Not found

## Sheet: S17
	Supplemental Table S17. GO terms enriched in down-regulated DEGs of E3day_H30min vs W3day_H30min in roots.
	GO terms	Fold enrichment	FDR
	Biological process
	xylan biosynthetic process (GO:0045492)	16.48	0.00832
	import across plasma membrane (GO:0098739)	15.98	0.0437
	xylan metabolic process (GO:0045491)	13.99	0.000938
	plant-type secondary cell wall biogenesis (GO:0009834)	13.34	0.000163
	plant-type cell wall modification (GO:0009827)	11.99	0.00708
	hemicellulose metabolic process (GO:0010410)	9.89	0.000496
	cell wall polysaccharide metabolic process (GO:0010383)	7.84	0.000438
	cell wall polysaccharide biosynthetic process (GO:0070592)	7.76	0.0422
	cell wall modification (GO:0042545)	7.41	0.000902
	plant-type cell wall organization (GO:0009664)	7.01	0.00132
	cell wall macromolecule metabolic process (GO:0044036)	6.53	0.000965
	cell wall organization (GO:0071555)	5.75	0.000536
	external encapsulating structure organization (GO:0045229)	5.14	0.000478
	plant-type cell wall biogenesis (GO:0009832)	4.63	0.0245
	polysaccharide metabolic process (GO:0005976)	4.42	0.000506
	carbohydrate biosynthetic process (GO:0016051)	3.93	0.042
	cell wall biogenesis (GO:0042546)	3.87	0.0163
	cell wall organization or biogenesis (GO:0071554)	3.79	6.93e-06
	plant-type cell wall organization or biogenesis (GO:0071669)	3.69	0.00474
	carbohydrate metabolic process (GO:0005975)	3.09	0.000863
	response to oxidative stress (GO:0006979)	3.02	0.0215
	cellular nitrogen compound metabolic process (GO:0034641)	0.42	0.019
	nucleobase-containing compound metabolic process (GO:0006139)	0.36	0.0245
	Molecular function
	lactoperoxidase activity (GO:0140825)	14.07	0.000714
	peroxidase activity (GO:0004601)	9.59	0.00264
	oxidoreductase activity, acting on peroxide as acceptor (GO:0016684)	9.09	0.00306
	antioxidant activity (GO:0016209)	8.73	0.00266
	oxidoreductase activity (GO:0016491)	2.67	0.00203
	Cellular component
	plant-type cell wall (GO:0009505)	6.04	2.41e-09
	cell wall (GO:0005618)	5.85	3.04e-09
	external encapsulating structure (GO:0030312)	5.84	3.44e-09
	extracellular region (GO:0005576)	2.47	1.14e-08
	cell periphery (GO:0071944)	2.1	1.71e-05
	intracellular anatomical structure (GO:0005622)	0.84	0.00695
	intracellular membrane-bounded organelle (GO:0043231)	0.83	0.0249
	membrane-bounded organelle (GO:0043227)	0.83	0.0199
	intracellular organelle (GO:0043229)	0.82	0.01
	organelle (GO:0043226)	0.82	0.00906
	protein-containing complex (GO:0032991)	0.3	0.0105

## Sheet: S18
	Supplemental Table S18. GO terms enriched in up-regulated DEGs of E3day_H90min vs W3day_H90min in shoots.
	GO terms	Fold enrichment	FDR
	Biological process
	glutamate catabolic process (GO:0006538)	22.73	0.0347
	glutamine family amino acid catabolic process (GO:0009065)	17.83	0.00938
	response to ozone (GO:0010193)	11.48	0.00858
	glutamate metabolic process (GO:0006536)	11.23	0.0395
	jasmonic acid biosynthetic process (GO:0009695)	10.82	0.0437
	jasmonic acid metabolic process (GO:0009694)	7.73	0.0396
	amino acid catabolic process (GO:0009063)	5.58	0.024
	response to UV (GO:0009411)	5.41	0.00501
	regulation of cellular ketone metabolic process (GO:0010565)	5.09	0.00346
	abscisic acid-activated signaling pathway (GO:0009738)	4.64	0.0139
	leaf senescence (GO:0010150)	4.63	4.31e-05
	response to decreased oxygen levels (GO:0036293)	4.51	3.74e-06
	response to oxygen levels (GO:0070482)	4.48	3.9e-06
	cellular response to hypoxia (GO:0071456)	4.44	0.00055
	response to hypoxia (GO:0001666)	4.42	1.02e-05
	cellular response to decreased oxygen levels (GO:0036294)	4.4	0.000593
	plant organ senescence (GO:0090693)	4.39	2.18e-05
	cellular response to oxygen levels (GO:0071453)	4.38	0.000611
	response to salicylic acid (GO:0009751)	4.17	3.43e-06
	cellular response to abscisic acid stimulus (GO:0071215)	4.15	0.00397
	cellular response to alcohol (GO:0097306)	4.15	0.00392
	hormone-mediated signaling pathway (GO:0009755)	3.77	1.45e-10
	regulation of signal transduction (GO:0009966)	3.68	3.91e-05
	regulation of small molecule metabolic process (GO:0062012)	3.64	0.0372
	regulation of signaling (GO:0023051)	3.58	5.24e-05
	regulation of cell communication (GO:0010646)	3.53	6.12e-05
	cellular response to hormone stimulus (GO:0032870)	3.36	1.08e-10
	cellular response to endogenous stimulus (GO:0071495)	3.27	2.41e-10
	response to abscisic acid (GO:0009737)	3.08	4.67e-09
	cellular response to lipid (GO:0071396)	3.08	2.56e-06
	leaf development (GO:0048366)	2.97	0.000791
	response to osmotic stress (GO:0006970)	2.94	3.98e-07
	response to alcohol (GO:0097305)	2.86	1.63e-08
	cellular response to organic substance (GO:0071310)	2.85	1.13e-10
	regulation of defense response (GO:0031347)	2.74	5.16e-05
	response to auxin (GO:0009733)	2.72	0.037
	regulation of response to stress (GO:0080134)	2.68	1.97e-05
	response to hormone (GO:0009725)	2.67	7.01e-16
	cellular response to chemical stimulus (GO:0070887)	2.67	8.5e-12
	response to salt stress (GO:0009651)	2.66	0.00111
	response to wounding (GO:0009611)	2.65	6.19e-05
	cellular response to oxygen-containing compound (GO:1901701)	2.65	1.41e-06
	response to endogenous stimulus (GO:0009719)	2.64	1.18e-15
	cellular catabolic process (GO:0044248)	2.59	2.69e-05
	response to jasmonic acid (GO:0009753)	2.58	0.00378
	response to salt (GO:1902074)	2.58	4.14e-07
	response to water (GO:0009415)	2.56	2.63e-06
	response to water deprivation (GO:0009414)	2.55	1.08e-05
	defense response to bacterium (GO:0042742)	2.54	5.74e-05
	response to organic cyclic compound (GO:0014070)	2.52	0.000398
	regulation of response to stimulus (GO:0048583)	2.51	1.27e-06
	response to acid chemical (GO:0001101)	2.5	3.58e-06
	response to bacterium (GO:0009617)	2.48	3.81e-06
	phyllome development (GO:0048827)	2.47	0.00183
	response to fatty acid (GO:0070542)	2.46	0.0106
	response to oxygen-containing compound (GO:1901700)	2.45	4.11e-16
	response to lipid (GO:0033993)	2.39	2.06e-11
	defense response to fungus (GO:0050832)	2.36	0.00217
	response to inorganic substance (GO:0010035)	2.36	1.2e-08
	response to fungus (GO:0009620)	2.3	0.000526
	monocarboxylic acid metabolic process (GO:0032787)	2.28	0.0369
	response to oxidative stress (GO:0006979)	2.24	0.033
	response to organic substance (GO:0010033)	2.21	4.51e-16
	response to chemical (GO:0042221)	2.08	2.4e-16
	response to external biotic stimulus (GO:0043207)	2.07	8.91e-07
	response to other organism (GO:0051707)	2.07	8.58e-07
	response to biotic stimulus (GO:0009607)	2.06	8.46e-07
	biological process involved in interspecies interaction between organisms (GO:0044419)	2.06	8.96e-07
	cellular response to stress (GO:0033554)	2.05	0.0104
	signal transduction (GO:0007165)	2.04	2.4e-05
	signaling (GO:0023052)	1.98	5.32e-05
	response to external stimulus (GO:0009605)	1.97	4.65e-07
	cellular response to stimulus (GO:0051716)	1.96	1.14e-08
	regulation of biosynthetic process (GO:0009889)	1.95	1.41e-06
	cell communication (GO:0007154)	1.95	2.73e-05
	regulation of DNA-templated transcription (GO:0006355)	1.95	4.53e-05
	defense response to other organism (GO:0098542)	1.94	0.000122
	regulation of RNA biosynthetic process (GO:2001141)	1.94	4.77e-05
	shoot system development (GO:0048367)	1.91	0.00728
	defense response (GO:0006952)	1.91	5.38e-05
	lipid metabolic process (GO:0006629)	1.9	0.0154
	regulation of nucleobase-containing compound metabolic process (GO:0019219)	1.88	1.11e-05
	regulation of primary metabolic process (GO:0080090)	1.88	3.76e-07
	response to abiotic stimulus (GO:0009628)	1.87	2.48e-09
	regulation of RNA metabolic process (GO:0051252)	1.87	7.97e-05
	regulation of cellular biosynthetic process (GO:0031326)	1.85	5.04e-05
	catabolic process (GO:0009056)	1.84	0.00106
	regulation of cellular metabolic process (GO:0031323)	1.83	2.68e-06
	response to stress (GO:0006950)	1.83	4.1e-11
	regulation of macromolecule biosynthetic process (GO:0010556)	1.81	0.000392
	regulation of nitrogen compound metabolic process (GO:0051171)	1.73	5.23e-05
	regulation of metabolic process (GO:0019222)	1.7	1.25e-06
	regulation of cellular process (GO:0050794)	1.65	1.56e-07
	response to stimulus (GO:0050896)	1.59	6.81e-13
	regulation of macromolecule metabolic process (GO:0060255)	1.57	0.000885
	regulation of biological process (GO:0050789)	1.55	1.52e-08
	regulation of gene expression (GO:0010468)	1.54	0.00647
	biological regulation (GO:0065007)	1.51	5.69e-08
	cellular process (GO:0009987)	1.26	3.64e-06
	Molecular function
	protein binding (GO:0005515)	1.52	0.00449
	Cellular component
	nucleus (GO:0005634)	1.31	0.00226
	intracellular anatomical structure (GO:0005622)	1.14	4.05e-05
	intracellular membrane-bounded organelle (GO:0043231)	1.13	0.0431
	membrane-bounded organelle (GO:0043227)	1.12	0.0404
	intracellular organelle (GO:0043229)	1.12	0.0304
	organelle (GO:0043226)	1.12	0.0397
	extracellular region (GO:0005576)	0.48	0.0324

## Sheet: S19
	Supplemental Table S19. GO terms enriched in down-regulated DEGs of E3day_H90min vs W3day_H90min in shoots.
	GO terms	Fold enrichment	FDR
	Biological process
	photosynthesis, light harvesting (GO:0009765)	9.74	0.0227
	photosynthesis, light reaction (GO:0019684)	5.5	0.00156
	photosynthesis (GO:0015979)	4.5	0.00146
	protein folding (GO:0006457)	4.46	0.0155
	cell wall macromolecule metabolic process (GO:0044036)	3.77	0.0386
	tetrapyrrole metabolic process (GO:0033013)	3.43	0.0321
	protein-containing complex assembly (GO:0065003)	2.84	0.00159
	response to oxidative stress (GO:0006979)	2.35	0.0373
	response to temperature stimulus (GO:0009266)	2.13	0.00774
	macromolecule biosynthetic process (GO:0009059)	2.11	2.85e-05
	protein-containing complex organization (GO:0043933)	2.09	0.0423
	cellular component biogenesis (GO:0044085)	1.84	0.018
	cellular nitrogen compound biosynthetic process (GO:0044271)	1.82	0.026
	response to abiotic stimulus (GO:0009628)	1.63	0.000267
	organic substance biosynthetic process (GO:1901576)	1.58	0.00164
	biosynthetic process (GO:0009058)	1.56	0.0016
	macromolecule metabolic process (GO:0043170)	1.36	0.00242
	response to stimulus (GO:0050896)	1.29	0.017
	organic substance metabolic process (GO:0071704)	1.24	0.0195
	cellular process (GO:0009987)	1.22	0.00116
	metabolic process (GO:0008152)	1.22	0.0168
	Molecular function
	Not found
	Cellular component
	plastid large ribosomal subunit (GO:0000311)	13.96	0.0493
	extracellular matrix (GO:0031012)	12.14	0.0175
	plastid thylakoid lumen (GO:0031978)	11.17	8.86e-05
	chloroplast thylakoid lumen (GO:0009543)	9.97	0.000558
	thylakoid lumen (GO:0031977)	8.21	0.000516
	thylakoid (GO:0009579)	4.46	1.54e-10
	secretory vesicle (GO:0099503)	4.44	0.00243
	thylakoid membrane (GO:0042651)	4.2	1.71e-06
	photosynthetic membrane (GO:0034357)	4.15	1.98e-06
	plastid thylakoid (GO:0031976)	4.01	6.15e-07
	plastid thylakoid membrane (GO:0055035)	3.94	3e-05
	chloroplast thylakoid (GO:0009534)	3.9	1.78e-06
	chloroplast stroma (GO:0009570)	3.88	1.35e-10
	chloroplast thylakoid membrane (GO:0009535)	3.83	8.13e-05
	plastid stroma (GO:0009532)	3.8	1.74e-10
	chloroplast envelope (GO:0009941)	3.78	2.47e-08
	plastid envelope (GO:0009526)	3.72	2.76e-11
	outer membrane (GO:0019867)	3.28	0.000118
	organelle outer membrane (GO:0031968)	3.28	0.000112
	plastid membrane (GO:0042170)	3.13	0.000215
	envelope (GO:0031975)	2.99	2.79e-10
	organelle envelope (GO:0031967)	2.99	2.44e-10
	nuclear outer membrane-endoplasmic reticulum membrane network (GO:0042175)	2.94	0.0469
	external encapsulating structure (GO:0030312)	2.72	0.00142
	plant-type cell wall (GO:0009505)	2.4	0.0338
	cell wall (GO:0005618)	2.32	0.0394
	endoplasmic reticulum (GO:0005783)	2.12	0.00272
	organelle membrane (GO:0031090)	2.01	0.000981
	bounding membrane of organelle (GO:0098588)	1.97	0.0448
	chloroplast (GO:0009507)	1.92	2e-12
	plastid (GO:0009536)	1.88	2.18e-12
	endomembrane system (GO:0012505)	1.83	0.000238
	intracellular non-membrane-bounded organelle (GO:0043232)	1.58	0.0319
	non-membrane-bounded organelle (GO:0043228)	1.58	0.0311
	membrane (GO:0016020)	1.55	0.000115
	cell periphery (GO:0071944)	1.47	0.0232
	cytoplasm (GO:0005737)	1.25	2.85e-06
	cellular anatomical entity (GO:0110165)	1.06	0.0118
	nucleus (GO:0005634)	0.78	0.0175

[truncated: 3 more sheets: S20, S21, S22]
