# Supplementary material for: Application of ethanol alleviates heat damage to leaf growth and yield in tomato
Source: Front Plant Sci. 2024 Feb 19;15:1325365. doi: 10.3389/fpls.2024.1325365 (PMC10909983; doi:10.3389/fpls.2024.1325365)
Supplement: Supplementary file 12 [file Table_11.xlsx]

## Sheet: S23
		Supplemental Table S23. GC-MS analysis of W3d and E3d in root.
				W3d			E3d			E3d vs W3d
			annotation	average	SD		average	SD		log2FoldChange	p_value	p_adj
		Amino acid	Alanine, DL- (2TMS)	8.78704e+08	5.16661e+08		2.59064e+09	3.19413e+09		1.37431	0.0128402	0.0576781
			Asparagine, DL- (3TMS)	2.28396e+09	2.03389e+09		1.58654e+09	1.15056e+09		-0.590587	0.123523	0.332234
			Aspartate	1.90476e+08	5.9624e+07		1.48787e+08	5.0386e+07		-0.356654	0.076861	0.234922
			Cysteine, DL- (3TMS)	6.99452e+06	3.19938e+06		3.85417e+07	4.30688e+07		2.24302	7.24378e-09	2.82508e-07
			Glutamate	1.51511e+08	4.76975e+07		1.31644e+08	3.34572e+07		-0.212089	0.0969748	0.270144
			Glutamine, DL- (3TMS)	1.15079e+11	6.19841e+10		8.42355e+10	4.2706e+10		-0.497355	0.0783075	0.234922
			Glycine	8.63707e+07	2.27195e+07		8.20031e+07	2.45264e+07		-0.129356	0.387385	0.642895
			Isoleucine	1.42617e+07	4.64136e+06		1.27215e+07	4.29817e+06		-0.168913	0.284971	0.542139
			Leucine, DL- (2TMS)	5.40358e+08	1.57631e+08		5.53933e+08	2.35145e+08		0.0171198	0.935089	0.972492
			Lysine, L- (4TMS)	2.28152e+07	1.71359e+07		6.14621e+07	7.47469e+07		1.35515	0.0218052	0.0773095
			Methionine, DL- (2TMS)	1.83976e+07	7.83939e+06		2.30087e+07	9.65898e+06		0.286075	0.162666	0.384483
			Phenylalanine, DL- (2TMS)	5.67968e+07	1.79157e+07		7.05018e+07	2.68237e+07		0.26144	0.0762743	0.234922
			Proline	5.86266e+07	2.22068e+07		5.80648e+07	2.50016e+07		-0.0552853	0.84941	0.960203
			Serine, DL- (3TMS)	2.57514e+09	8.19039e+08		3.03507e+09	1.22388e+09		0.175847	0.193954	0.408877
			Threonine, DL- (3TMS)	9.82473e+08	3.22542e+08		7.68376e+08	2.68595e+08		-0.381334	0.0040315	0.026623
			Tryptophan	659777	193674		910938	573170		0.387358	0.190501	0.408877
			Tyrosine, DL- (3TMS)	5.33478e+07	9.8793e+06		6.00826e+07	2.40671e+07		0.0762214	0.614969	0.827028
			Valine, DL- (2TMS)	4.3289e+08	1.3779e+08		3.10408e+08	1.02023e+08		-0.494919	0.00190401	0.0165014
			Alanine, 3-cyano-, L- (2TMS)	3.07661e+07	1.81705e+07		2.34098e+07	1.61122e+07		-0.523678	0.178533	0.408877
			Alanine, beta- (3TMS)	1.34616e+08	4.62484e+07		1.7696e+08	6.21544e+07		0.345066	0.0163135	0.0636228
			Cystine, L- (4TMS)	3.54635e+08	1.54322e+08		3.4613e+08	1.23048e+08		-0.104646	0.714213	0.903723
			Homoserine, DL- (3TMS)	1.04795e+07	6.5766e+06		1.08047e+07	7.33625e+06		-0.00163879	0.995867	0.995867
			Pyroglutamate	2.72991e+10	8.33512e+09		2.18743e+10	8.79585e+09		-0.347666	0.145901	0.379343
		Amine	Butyric acid, 4-amino- (3TMS)	2.80948e+09	1.8642e+09		3.73516e+09	2.62955e+09		0.332206	0.37731	0.642895
			Hydroxylamine (3TMS)	3.88544e+09	2.66343e+08		3.54605e+09	3.9926e+08		-0.029827	0.914752	0.964198
			Nicotianamine (4TMS)	7.47914e+07	5.40681e+07		7.41302e+07	3.77113e+07		-0.0901606	0.820212	0.940832
			Ornithine, DL- (4TMS)	1.92146e+07	8.65616e+06		6.4121e+07	1.01166e+08		1.67293	NA	NA
			Putrescine	320038	127708		576154	223334		0.823723	0.00409585	0.026623
			Spermidine (5TMS)	9.86809e+06	6.40431e+06		1.18258e+07	7.84742e+06		0.235151	0.575218	0.801197
			Tryptamine (3TMS)	1.74966e+09	5.75987e+08		1.7171e+09	2.75232e+08		0.0633571	0.768027	0.936032
			Tryptamine, 5-hydroxy- (3TMS)	7.61305e+07	2.54656e+07		7.06896e+07	3.13391e+07		-0.226433	0.383447	0.642895
			Tryptamine, 5-hydroxy- (4TMS)	387175	402306		545690	312011		0.39871	0.518394	0.735177
		Organic acid	Aconitic acid, cis- (3TMS)	8.23038e+06	4.95677e+06		5.5354e+06	2.9607e+06		-0.652016	0.152409	0.38348
			Caffeic acid, trans- (3TMS)	1.80142e+08	1.1583e+08		1.4621e+08	9.73136e+07		-0.426255	0.292447	0.543116
			Citric acid (4TMS)	8.72392e+10	4.6661e+10		4.48031e+10	1.86006e+10		-1.0896	0.00236218	0.018425
			Fumaric acid (2TMS)	1.2764e+08	3.03222e+07		1.39283e+08	4.61961e+07		0.0764004	0.7195	0.903723
			Galacturonic acid, D- (1MEOX) (5TMS)	9.24796e+07	4.1403e+07		6.40032e+08	1.43974e+09		2.66603	NA	NA
			Glutaric acid (2TMS)	22888.2	39455.9		5193.01	6408.45		-2.08839	0.265545	0.517813
			Glutaric acid, 2-oxo- (1MEOX) (2TMS)	5.06116e+10	2.43885e+10		7.78682e+10	3.03893e+10		0.651006	0.0159073	0.0636228
			Glyceric acid, DL- (3TMS)	6.10123e+07	2.9335e+07		7.38491e+07	3.00818e+07		0.218871	0.436799	0.662634
			Glycolic acid (2TMS)	8.74256e+07	1.06127e+08		3.7135e+07	1.38109e+07		-1.14245	0.0111625	0.0576781
			Isocitric acid, DL- (4TMS)	2.2033e+09	7.54571e+08		2.40001e+09	1.44337e+09		0.0372804	0.905111	0.964198
			Lactate	4.73527e+08	4.25772e+07		5.03203e+08	8.99895e+07		0.0837907	0.718624	0.903723
			Malic acid, DL- (3TMS)	3.58945e+11	7.71612e+10		2.85279e+11	6.85735e+10		-0.302939	0.158977	0.384483
			Quinic acid, D(-)- (5TMS)	1.57402e+09	5.81875e+08		1.61323e+09	6.43551e+08		-0.0128526	0.959933	0.985195
			Quinic acid, 3-caffeoyl-, cis- (6TMS)	2.11422e+09	9.05321e+08		1.64066e+09	5.51535e+08		-0.364939	0.04596	0.155864
			Quinic acid, 3-caffeoyl-, trans- (6TMS)	3.89912e+08	1.95084e+08		4.87778e+08	3.14155e+08		0.309693	0.419247	0.662634
			Shikimic acid (4TMS)	2.83877e+08	5.59624e+07		2.53344e+08	1.92085e+08		-0.242743	0.401361	0.652211
			Suberic acid (2TMS)	295289	214667		432568	957881		0.139071	NA	NA
			Succinate	2.93389e+06	660139		2.28042e+06	502233		-0.402953	0.0133103	0.0576781
		Sugar	Fructose, D- (1MEOX) (5TMS)	4.39513e+11	2.42746e+11		1.08114e+12	5.29329e+11		1.24657	0.00023718	0.0037
			Fructose-6-phosphate	3.63464e+06	1.39603e+06		4.14724e+06	1.59664e+06		0.138487	0.481619	0.705188
			Galactinol (9TMS)	5.16993e+08	1.7823e+08		4.14304e+08	1.39017e+08		-0.391599	0.0199174	0.0739788
			Glucose1	2.30326e+09	9.82551e+08		6.49931e+09	3.457e+09		1.3959	7.76873e-06	0.00015149
			Glucose-6-phosphate (1MEOX) (6TMS)	1.86762e+09	6.63369e+08		2.2711e+09	1.10882e+09		0.227722	0.383935	0.642895
			Isomaltose (1MEOX) (8TMS)	2.19011e+07	7.22986e+06		6.14662e+07	3.50484e+07		1.39327	3.53107e-08	9.18079e-07
			Raffinose (11TMS)	91283.5	188294		180441	235370		0.93195	0.488207	0.705188
			Ribose, D- (1MEOX) (4TMS)	1.49841e+09	5.24425e+08		1.53091e+09	5.248e+08		0.00430441	0.978817	0.991529
			Sucrose	2.15485e+08	7.14755e+07		3.33212e+08	1.32198e+08		0.549527	0.0101216	0.0563916
			Trehalose, alpha,alpha'-, D- (8TMS)	4.09327e+06	4.2822e+06		1.53897e+07	9.13026e+06		1.88664	0.00144157	0.0140553
		Alcohol	Glycerol	6.83848e+07	2.55754e+07		6.36106e+07	1.79389e+07		-0.0754733	0.782322	0.938787
			Inositol, myo- (6TMS)	2.29719e+10	8.20883e+09		1.63749e+10	7.72668e+09		-0.550107	0.0131437	0.0576781
			Phytol (1TMS)	770344	824776		1.16692e+06	1.85284e+06		0.331635	0.695889	0.903723
		Other	[Dihydrouracil_2TMS]	1.83247e+08	5.11126e+07		2.3019e+08	1.12833e+08		0.242123	0.383887	0.642895
			Lumichrome (2MEOX)	1.12088e+09	6.67083e+08		9.84762e+08	6.27116e+08		-0.0510657	0.897456	0.964198
			Phosphoric acid (3TMS)	3.92673e+11	1.44015e+11		3.67476e+11	7.76509e+10		-0.0431467	0.870282	0.964198
			Threonic acid-1,4-lactone (2TMS)	1.31627e+06	600135		1.14646e+06	731791		-0.272059	0.441756	0.662634
			Methyltris(trimethylsiloxy)silane	1.13996e+10	1.04876e+09		1.05932e+10	1.0702e+09		-0.0616303	0.800322	0.940832
			Pyridine, 2-hydroxy- (1TMS)	1.74687e+08	2.86079e+07		1.43109e+08	2.41027e+07		-0.250037	0.222324	0.456349
			1,3-Propanediol, 2TMS derivative	1.14944e+11	1.19913e+10		1.08593e+11	8.5033e+09		-0.0307896	0.908339	0.964198
			Oxalic acid (2TMS)	8.64118e+09	3.47947e+09		4.6405e+09	1.4605e+09		-0.968061	0.000541999	0.00603942
			1,4-Butanediol, 2TMS derivative	7.96484e+09	5.82391e+08		7.01096e+09	6.06553e+08		-0.130252	0.606896	0.827028
			Pseudotropine (1TMS)	3.34815e+07	4.82254e+07		7.19526e+07	8.22842e+07		1.57559	0.0968984	0.270144
			Piperidin-2-one, 3-amino- (2TMS)	6.43073e+06	5.3312e+06		5.82951e+06	3.97556e+06		-0.145795	0.72993	0.903723
			Threonic acid (4TMS)	1.6016e+08	4.69683e+07		5.73141e+08	2.11028e+08		1.70769	7.05215e-13	5.50067e-11
			Propane, 1,3-diamino- (4TMS)	5.32389e+07	1.86616e+07		4.23209e+07	1.42943e+07		-0.316284	0.189024	0.408877
			Saccharic acid (6TMS)	1.81809e+11	3.0531e+10		1.34133e+11	4.9458e+10		-0.587936	0.00578382	0.0347029
			Dopamine (4TMS)	2.17632e+07	7.63868e+06		6.15762e+07	4.41499e+07		1.27905	0.000360327	0.00468424
			Octadecatrienoic acid, 9,12,15-(Z,Z,Z)-, n- (1TMS)	6.60321e+09	4.12964e+09		5.41181e+09	5.11195e+09		-0.381079	0.434908	0.662634
			Inositol-1-phosphate, myo- (7TMS)	1.32482e+08	2.80752e+07		1.5151e+08	4.02049e+07		0.174766	0.232097	0.464195
			Hexadecanoate	3.91062e+07	9.08565e+06		4.06634e+07	1.55341e+07		0.0566682	0.813201	0.940832

## Sheet: S24
	Supplemental Table S24. GC-MS analysis of W3d and E3d in shoot.
			W3d			E3d			E3d vs W3d
		annotation	average	SD		average	SD		log2FoldChange	p_value	p_adj
	Amino acid	Alanine, DL- (2TMS)	3.66853e+10	2.64753e+10		3.81343e+10	2.0841e+10		-0.0287144	0.933644	0.968486
		Asparagine, DL- (3TMS)	1.67413e+11	1.78671e+11		1.88631e+11	1.92436e+11		0.0606141	0.929796	0.968486
		Aspartate	4.38495e+09	1.12748e+09		4.9565e+09	1.55491e+09		0.0505297	0.752689	0.931819
		Cysteine, DL- (3TMS)	5.16426e+06	4.13755e+06		5.77298e+06	3.82666e+06		0.0341768	0.948652	0.968486
		Glutamate	1.91617e+09	4.15965e+08		2.52668e+09	5.64729e+08		0.28442	0.0221689	0.224461
		Glutamine, DL- (3TMS)	4.75844e+11	3.98426e+11		5.31988e+11	4.0592e+11		0.0229542	0.962262	0.968486
		Glycine	1.87692e+09	1.62568e+09		2.07744e+09	1.2546e+09		0.0329143	0.93312	0.968486
		Isoleucine	3.40866e+08	2.72212e+08		3.20608e+08	2.51905e+08		-0.220646	0.603484	0.899858
		Leucine, DL- (2TMS)	2.93941e+09	3.41632e+09		3.5159e+09	5.09554e+09		0.117097	0.900465	0.968486
		Lysine, L- (4TMS)	4.2461e+08	3.50279e+08		3.80713e+08	4.13012e+08		-0.361678	0.543885	0.899858
		Methionine, DL- (2TMS)	2.13916e+06	2.74362e+06		917272	709806		-1.2813	0.0713982	0.38555
		Phenylalanine, DL- (2TMS)	3.02196e+09	3.68065e+09		2.44649e+09	2.2034e+09		-0.402992	0.427609	0.896803
		Proline	9.82662e+08	7.83804e+08		1.28818e+09	1.017e+09		0.350936	0.486232	0.899858
		Serine, DL- (3TMS)	4.09777e+10	2.80162e+10		1.81828e+10	1.09061e+10		-1.24413	0.000945457	0.038291
		Threonine, DL- (3TMS)	4.60229e+10	3.13665e+10		4.49543e+10	3.18112e+10		-0.173569	0.647603	0.899858
		Tryptophan	9.03713e+07	6.518e+07		1.23814e+08	1.1887e+08		0.314126	0.49956	0.899858
		Tyrosine, DL- (3TMS)	6.05777e+08	8.35013e+08		3.21749e+08	4.37994e+08		-1.01099	0.121701	0.50667
		Valine, DL- (2TMS)	2.44848e+09	2.0488e+09		2.2727e+09	2.1708e+09		-0.229425	0.602221	0.899858
		Alanine, 3-cyano-, L- (2TMS)	2.15871e+09	2.25859e+09		2.60624e+09	3.22375e+09		0.145842	0.828547	0.959811
		Alanine, beta- (3TMS)	2.76431e+08	1.37125e+08		3.12091e+08	1.69432e+08		0.0563817	0.841316	0.959811
		Cystine, L- (4TMS)	2.611e+08	5.85311e+07		2.52115e+08	6.22933e+07		-0.203501	0.290016	0.783045
		Homoserine, DL- (3TMS)	1.53486e+08	6.71164e+07		1.32542e+08	7.86307e+07		-0.38396	0.240787	0.702363
		Pyroglutamate	7.93657e+10	4.50616e+10		9.35764e+10	4.67721e+10		0.100366	0.75926	0.931819
	Amine	Butyric acid, 4-amino- (3TMS)	2.48986e+10	1.12698e+10		3.26394e+10	1.6787e+10		0.282678	0.32309	0.844203
		Hydroxylamine (3TMS)	3.13189e+09	2.60917e+08		2.92889e+09	5.21748e+08		-0.243495	0.121943	0.50667
		Nicotianamine (4TMS)	1.10811e+07	5.44227e+06		2.13899e+07	1.27035e+07		0.820047	0.0386324	0.260769
		Ornithine, DL- (4TMS)	1.33024e+09	8.07752e+08		1.56131e+09	1.29074e+09		0.0487245	0.916148	0.968486
		Putrescine	694604	214295		1.02176e+06	253296		0.458179	0.0443059	0.27606
		Spermidine (5TMS)	6.05286e+07	2.40387e+07		4.30948e+07	1.36257e+07		-0.54651	0.0382525	0.260769
		Tryptamine (3TMS)	5.5798e+07	1.29823e+07		5.00731e+07	1.02536e+07		-0.29935	0.131359	0.50667
		Tryptamine, 5-hydroxy- (3TMS)	2.62549e+08	6.34978e+07		2.69797e+08	3.2895e+07		-0.0676662	0.695281	0.912092
		Tryptamine, 5-hydroxy- (4TMS)	103344240	6.8706e+07		1.64657e+08	7.96342e+07		0.614832	0.125647	0.50667
	Organic acid	Aconitic acid, cis- (3TMS)	5.87141e+06	4.45811e+06		1.41076e+07	1.65912e+07		1.03967	0.107891	0.50667
		Caffeic acid, trans- (3TMS)	1.35643e+09	3.44927e+08		1.3973e+09	3.51657e+08		-0.0853763	0.655452	0.899858
		Citric acid (4TMS)	2.44433e+11	6.4992e+10		2.87499e+11	1.07656e+11		0.0757882	0.698144	0.912092
		Fumaric acid (2TMS)	1.10521e+10	4.9723e+09		9.7126e+09	7.68031e+09		-0.320954	0.571411	0.899858
		Galacturonic acid, D- (1MEOX) (5TMS)	1.39837e+09	7.81904e+08		1.61612e+09	6.77582e+08		0.0941995	0.805264	0.959211
		Glutaric acid (2TMS)	174222	184022		44623.2	81365.9		-2.07052	0.204253	0.66178
		Glutaric acid, 2-oxo- (1MEOX) (2TMS)	6.97192e+07	4.40257e+07		1.36857e+08	8.99722e+07		0.842947	0.140623	0.517748
		Glyceric acid, DL- (3TMS)	5.61947e+08	4.10222e+08		8.02967e+08	3.44199e+08		0.413046	0.36335	0.871241
		Glycolic acid (2TMS)	1.22444e+08	1.41358e+08		5.9294e+07	1.24583e+07		-1.11338	0.00905891	0.122295
		Isocitric acid, DL- (4TMS)	1.56729e+09	3.47077e+08		1.69604e+09	9.22027e+08		0.0138871	0.968486	0.968486
		Lactate	4.27301e+08	3.72366e+07		4.21536e+08	3.59407e+07		-0.161531	0.28805	0.783045
		Malic acid, DL- (3TMS)	1.38277e+12	3.89748e+11		1.3251e+12	4.58041e+11		-0.154005	0.568106	0.899858
		Quinic acid, D(-)- (5TMS)	1.54709e+10	5.69267e+09		2.3431e+10	3.93976e+09		0.504158	0.00734009	0.122295
		Quinic acid, 3-caffeoyl-, cis- (6TMS)	1.72649e+09	1.08157e+09		1.99292e+09	1.12694e+09		0.108208	0.728731	0.925875
		Quinic acid, 3-caffeoyl-, trans- (6TMS)	6.79475e+07	4.72107e+07		4.86726e+07	2.91924e+07		-0.560999	0.156179	0.550021
		Shikimic acid (4TMS)	1.6439e+09	4.57002e+08		1.93214e+09	3.24315e+08		0.0974567	0.555891	0.899858
		Suberic acid (2TMS)	5.9362e+06	5.83702e+06		5.6188e+06	4.81456e+06		-0.158604	0.841222	0.959811
		Succinate	1.50461e+07	3.65403e+06		2.10626e+07	5.77108e+06		0.375513	0.0548647	0.317432
	Sugar	Fructose, D- (1MEOX) (5TMS)	3.96293e+11	2.89488e+11		7.91888e+11	3.95974e+11		0.908097	0.0336927	0.260769
		Fructose-6-phosphate	1.54008e+06	460955		1.65546e+06	564777		-0.0243336	0.909895	0.968486
		Galactinol (9TMS)	8.90463e+08	3.3331e+08		9.0796e+08	1.75235e+08		-0.0568229	0.782702	0.946251
		Glucose1	1.88857e+09	1.27465e+09		4.7489e+09	1.67435e+09		1.24111	0.000654316	0.038291
		Glucose-6-phosphate (1MEOX) (6TMS)	7.62635e+08	3.40464e+08		8.79257e+08	3.5261e+08		0.0999473	0.678399	0.912092
		Isomaltose (1MEOX) (8TMS)	1.7444e+06	1.10638e+06		2.36074e+06	1.58472e+06		0.365337	0.431794	0.896803
		Raffinose (11TMS)	138130	102118		501964	971386		2.00294	0.0368307	0.260769
		Ribose, D- (1MEOX) (4TMS)	1.65889e+08	8.73671e+07		1.8874e+08	8.84531e+07		0.1115	0.731556	0.925875
		Sucrose	6.08322e+08	3.11282e+08		6.92185e+08	1.42645e+08		0.126255	0.574848	0.899858
		Trehalose, alpha,alpha'-, D- (8TMS)	1.06865e+08	3.96845e+07		1.96544e+08	8.70049e+07		0.792805	0.00340581	0.091957
	Alcohol	Glycerol	3.041e+08	6.87002e+07		3.11752e+08	5.18113e+07		-0.0693081	0.524252	0.899858
		Inositol, myo- (6TMS)	3.86357e+11	1.90365e+11		500796667193	1.31088e+11		0.311993	0.195342	0.659278
		Phytol (1TMS)	2.87311e+08	7.8297e+07		2.9587e+08	3.34062e+07		-0.0649137	0.637242	0.899858
	Other	[Dihydrouracil_2TMS]	3.69291e+08	1.22045e+08		4.53296e+08	1.58019e+08		0.1513	0.584075	0.899858
		Lumichrome (2MEOX)	1.40886e+10	7.41407e+09		1.05779e+10	6.60962e+09		-0.497658	0.217961	0.679032
		Phosphoric acid (3TMS)	1.24309e+12	3.2737e+11		1.23727e+12	3.35675e+11		-0.108332	0.594251	0.899858
		Threonic acid-1,4-lactone (2TMS)	5.03068e+09	1.40626e+09		4.84993e+09	1.41075e+09		-0.179084	0.368335	0.871241
		Methyltris(trimethylsiloxy)silane	1.00584e+10	8.73745e+08		1.05023e+10	1.89592e+09		-0.0805318	0.632599	0.899858
		Pyridine, 2-hydroxy- (1TMS)	2.5666e+08	3.28633e+07		2.56376e+08	6.19202e+07		-0.147427	0.363576	0.871241
		1,3-Propanediol, 2TMS derivative	9.85636e+10	5.96198e+09		9.9854e+10	9.66919e+09		-0.121522	0.410605	0.896803
		Oxalic acid (2TMS)	4.02081e+08	2.45195e+08		1.95434e+08	1.19204e+08		-1.12481	0.00858171	0.122295
		1,4-Butanediol, 2TMS derivative	6.87131e+09	8.41336e+08		6.594e+09	9.26622e+08		-0.206955	0.242792	0.702363
		Pseudotropine (1TMS)	307833	199513		381830	88443.3		0.166563	0.644335	0.899858
		Piperidin-2-one, 3-amino- (2TMS)	3.76051e+09	2.71283e+09		3.45817e+09	2.96544e+09		-0.317049	0.527377	0.899858
		Threonic acid (4TMS)	2.15182e+10	9.91876e+09		2.67448e+10	9.82881e+09		0.167484	0.581015	0.899858
		Propane, 1,3-diamino- (4TMS)	9.96664e+07	5.58188e+07		1.07789e+08	8.79426e+07		-0.0590622	0.887003	0.968486
		Saccharic acid (6TMS)	2.60383e+10	7.64249e+09		2.66858e+10	7.17246e+09		-0.132461	0.60673	0.899858
		Dopamine (4TMS)	1.05128e+06	1.2257e+06		2.66916e+06	2.455e+06		1.32135	0.0216137	0.224461
		Octadecatrienoic acid, 9,12,15-(Z,Z,Z)-, n- (1TMS)	1.10236e+10	5.7796e+09		9.32237e+09	5.52796e+09		-0.3482	0.387218	0.871241
		Inositol-1-phosphate, myo- (7TMS)	1.20213e+08	2.15144e+07		1.20763e+08	1.18057e+07		-0.123123	0.37965	0.871241
		Hexadecanoate	5.36892e+07	8.54299e+06		4.44386e+07	1.26934e+07		-0.403719	0.101306	0.50667

## Sheet: S25
		Supplemental Table S25. GC-MS analysis of W3d_H150m and E3d_H150m in root.
				W3d_H150m			E3d_H150m			E3d_H150m vs W3d_H150m
			annotation	average	SD		average	SD		log2FoldChange	p_value	p_adj
		Amino acid	Alanine, DL- (2TMS)	4.84966e+08	3.0449e+08		7.7839e+09	1.21233e+10		3.19252	6.30007e-10	8.13375e-09
			Asparagine, DL- (3TMS)	5.7414e+09	1.72433e+09		3.29605e+09	1.33938e+09		-1.41211	2.15032e-08	1.45147e-07
			Aspartate	1.71565e+08	6.4938e+07		1.42762e+08	3.26172e+07		-0.802692	0.000339953	0.000983436
			Cysteine, DL- (3TMS)	8.11644e+06	3.24279e+06		5.23073e+07	2.92305e+07		2.03673	1.51211e-09	1.3609e-08
			Glutamate	4.1114e+07	1.43095e+07		9.00401e+07	3.0106e+07		0.526454	0.0050295	0.0104459
			Glutamine, DL- (3TMS)	1.50124e+11	5.33009e+10		1.08808e+11	2.07789e+10		-1.05499	2.69517e-06	1.14899e-05
			Glycine	7.91151e+07	1.47667e+07		1.66639e+08	5.9069e+07		0.428698	0.0103317	0.0209217
			Isoleucine	4.76262e+07	1.97356e+07		2.51184e+07	5.09483e+06		-1.47642	7.02916e-10	8.13375e-09
			Leucine, DL- (2TMS)	6.85338e+08	3.21351e+08		6.38266e+08	2.52636e+08		-0.750649	0.000799774	0.00208973
			Lysine, L- (4TMS)	1.2733e+08	1.11759e+08		136226204	9.67304e+07		-0.511728	0.242207	0.324256
			Methionine, DL- (2TMS)	1.00058e+07	3.31747e+06		2.09912e+07	7.39518e+06		0.422355	0.0367079	0.0632625
			Phenylalanine, DL- (2TMS)	7.24133e+07	1.70522e+07		1.15983e+08	3.97526e+07		0.0241342	0.884283	0.895337
			Proline	6.13597e+07	3.24432e+07		7.48957e+07	2.61143e+07		-0.293753	0.339219	0.422719
			Serine, DL- (3TMS)	8.50966e+08	2.98822e+08		3.10496e+09	1.31705e+09		1.22168	7.93769e-08	4.59252e-07
			Threonine, DL- (3TMS)	9.03524e+08	2.19851e+08		8.87391e+08	2.64703e+08		-0.650352	5.97898e-06	2.42149e-05
			Tryptophan	3.3206e+06	1.58961e+06		3.30006e+06	909781		-0.590886	0.023364	0.0420552
			Tyrosine, DL- (3TMS)	9.41628e+07	2.67513e+07		1.91013e+08	7.98264e+07		0.369336	0.090641	0.141191
			Valine, DL- (2TMS)	6.52111e+08	1.69793e+08		6.58036e+08	1.3764e+08		-0.579922	0.000109809	0.000329427
			Alanine, 3-cyano-, L- (2TMS)	128338788	4.93533e+07		4.68412e+07	3.21066e+07		-1.99642	7.11677e-08	4.4343e-07
			Alanine, beta- (3TMS)	1.18521e+08	3.22482e+07		1.65345e+08	6.3497e+07		-0.14757	0.437823	0.513967
			Cystine, L- (4TMS)	2.98034e+07	1.76543e+07		1.44749e+08	8.79186e+07		1.57656	8.01537e-06	2.95112e-05
			Homoserine, DL- (3TMS)	5.48399e+06	4.34078e+06		7.21838e+06	2.67905e+06		-0.187526	0.577107	0.623275
			Pyroglutamate	3.65342e+10	7.49785e+09		3.23921e+10	7.5448e+09		-0.78916	2.22689e-05	7.84252e-05
		Amine	Butyric acid, 4-amino- (3TMS)	1.82054e+09	6.70308e+08		5.15618e+09	4.03683e+09		0.77256	0.0171014	0.0322142
			Hydroxylamine (3TMS)	3.96977e+09	4.83972e+08		3.48933e+09	8.01994e+08		-0.753165	0.00314889	0.00686186
			Nicotianamine (4TMS)	3.4933e+07	1.26337e+07		7.09258e+07	2.6411e+07		0.321891	0.199833	0.279077
			Ornithine, DL- (4TMS)	2.61694e+07	1.0557e+07		6.79418e+07	4.13277e+07		0.836964	0.0225851	0.0415771
			Putrescine	106265	38413.9		332583	105667		1.00762	0.00124943	0.00306679
			Spermidine (5TMS)	1.37128e+07	5.2271e+06		2.23386e+07	5.39732e+06		0.114762	0.661533	0.686977
			Tryptamine (3TMS)	9.45032e+08	3.8957e+08		1.95935e+09	6.09314e+08		0.509322	0.0463714	0.0766547
			Tryptamine, 5-hydroxy- (3TMS)	8.42212e+07	3.14607e+07		9.10796e+07	2.43853e+07		-0.439068	0.106287	0.15943
			Tryptamine, 5-hydroxy- (4TMS)	84410.7	80619.7		304623	216071		1.14187	0.0941799	0.143935
		Organic acid	Aconitic acid, cis- (3TMS)	1.08601e+07	3.87499e+06		1.10084e+07	1.00849e+07		-0.488657	0.310236	0.392642
			Caffeic acid, trans- (3TMS)	2.34147e+08	1.63677e+08		2.53828e+08	1.39452e+08		-0.524087	0.244193	0.324256
			Citric acid (4TMS)	9.90827e+10	4.63891e+10		4.43314e+10	1.69553e+10		-1.68997	1.83254e-06	8.24642e-06
			Fumaric acid (2TMS)	1.0774e+08	3.25417e+07		1.44217e+08	7.65091e+07		-0.179413	0.48294	0.543307
			Galacturonic acid, D- (1MEOX) (5TMS)	7.97469e+07	2.38773e+07		1.00258e+08	3.71369e+07		-0.319887	0.258212	0.337341
			Glutaric acid (2TMS)	11201.4	18341		5294.94	4339.06		-1.88821	0.290775	0.373854
			Glutaric acid, 2-oxo- (1MEOX) (2TMS)	1.55448e+10	8.07183e+09		1.25421e+11	5.85811e+10		2.40231	2.79398e-14	4.52626e-13
			Glyceric acid, DL- (3TMS)	2.30474e+07	2.54313e+07		1.48334e+08	7.62613e+07		2.09669	6.77248e-06	2.61224e-05
			Glycolic acid (2TMS)	4.85091e+07	2.86671e+07		3.17183e+07	8.64657e+06		-1.21608	3.19666e-05	0.000107887
			Isocitric acid, DL- (4TMS)	2.39235e+09	4.00184e+08		1.82829e+09	7.33301e+08		-0.998337	0.000745917	0.00201398
			Lactate	4.46284e+08	4.36743e+07		4.32755e+08	7.91006e+07		-0.640416	0.00272956	0.00614151
			Malic acid, DL- (3TMS)	2.12295e+11	6.18629e+10		2.93584e+11	7.60685e+10		-0.0547294	0.827186	0.848127
			Quinic acid, D(-)- (5TMS)	3.92245e+08	1.77285e+08		9.33314e+08	4.20239e+08		0.629708	0.0396313	0.0668778
			Quinic acid, 3-caffeoyl-, cis- (6TMS)	1.27118e+09	4.68101e+08		2.26915e+09	7.48113e+08		0.24506	0.397157	0.480145
			Quinic acid, 3-caffeoyl-, trans- (6TMS)	2.54804e+08	1.60611e+08		4.35092e+08	1.58339e+08		0.14395	0.654738	0.686977
			Shikimic acid (4TMS)	4.9972e+07	1.62291e+07		1.03129e+08	4.85927e+07		0.40042	0.0699362	0.113297
			Suberic acid (2TMS)	111350	147634		262764	357479		0.634668	0.405446	0.482958
			Succinate	2.4723e+06	730369		3.47889e+06	1.9234e+06		-0.173306	0.526115	0.583771
		Sugar	Fructose, D- (1MEOX) (5TMS)	1.75062e+10	3.28752e+10		7.69274e+11	4.86342e+11		4.90569	1.16207e-08	8.55708e-08
			Fructose-6-phosphate	78513.2	24448.4		622208	329315		2.2713	1.29043e-09	1.30656e-08
			Galactinol (9TMS)	4.69155e+08	2.39404e+08		8.75781e+08	3.13284e+08		0.256541	0.353491	0.433829
			Glucose1	2.0338e+08	4.19068e+07		3.08334e+09	2.81875e+09		3.11004	8.77151e-15	1.77623e-13
			Glucose-6-phosphate (1MEOX) (6TMS)	2.82925e+06	4.69192e+06		2.03061e+08	1.24198e+08		5.58335	3.1308e-09	2.53594e-08
			Isomaltose (1MEOX) (8TMS)	3.28966e+07	1.635e+07		1.14805e+08	7.34432e+07		1.19546	8.22932e-05	0.00026663
			Raffinose (11TMS)	150803	139384		120703	66165.8		-0.914841	0.195769	0.278199
			Ribose, D- (1MEOX) (4TMS)	6.93025e+08	2.06907e+08		9.76438e+08	2.03446e+08		-0.10461	0.548237	0.600097
			Sucrose	5.28321e+06	6.49348e+06		3.79473e+08	2.59636e+08		5.52037	9.65044e-21	7.81686e-19
			Trehalose, alpha,alpha'-, D- (8TMS)	2.98828e+07	1.29682e+07		4.02769e+08	2.94609e+08		3.10032	8.82003e-18	3.57211e-16
		Alcohol	Glycerol	7.95566e+07	1.59028e+07		9.53473e+07	2.83952e+07		-0.306321	0.237394	0.324256
			Inositol, myo- (6TMS)	9.30431e+09	5.51781e+09		2.64513e+10	1.56176e+10		0.828115	0.0151177	0.0291555
			Phytol (1TMS)	814058	761625		1.95746e+06	1.68384e+06		0.575811	0.446747	0.51695
		Other	[Dihydrouracil_2TMS]	8.83747e+07	1.11971e+08		4.30309e+08	1.78475e+08		1.73243	8.76801e-05	0.000273157
			Lumichrome (2MEOX)	1.07162e+09	5.91355e+08		1.02348e+09	5.47115e+08		-0.626185	0.0789619	0.12541
			Phosphoric acid (3TMS)	4.53326e+11	8.65577e+10		5.29473e+11	1.58946e+11		-0.343905	0.182504	0.263979
			Threonic acid-1,4-lactone (2TMS)	600341	192393		910763	532691		-0.0405829	0.907859	0.907859
			Methyltris(trimethylsiloxy)silane	1.11552e+10	1.41513e+09		1.03664e+10	1.91949e+09		-0.703133	0.00217813	0.00504081
			Pyridine, 2-hydroxy- (1TMS)	1.40558e+08	2.09786e+07		1.44344e+08	2.16351e+07		-0.572688	0.00109511	0.00277199
			1,3-Propanediol, 2TMS derivative	1.10807e+11	1.0971e+10		1.06547e+11	1.82273e+10		-0.646583	0.00321914	0.00686186
			Oxalic acid (2TMS)	6.73132e+09	1.99983e+09		4.37776e+09	1.05417e+09		-1.26827	9.17637e-08	4.95524e-07
			1,4-Butanediol, 2TMS derivative	7.59302e+09	7.59548e+08		6.97026e+09	1.31551e+09		-0.705767	0.0013035	0.00310539
			Pseudotropine (1TMS)	3.11878e+07	6.61255e+07		2.29154e+08	1.09259e+08		2.4882	0.000505039	0.00141063
			Piperidin-2-one, 3-amino- (2TMS)	1.24704e+07	8.4357e+06		1.38077e+07	5.62268e+06		-0.450854	0.162971	0.240012
			Threonic acid (4TMS)	7.89492e+07	3.44315e+07		9.01963e+08	5.97119e+08		2.80224	1.54835e-17	4.18055e-16
			Propane, 1,3-diamino- (4TMS)	6.46235e+07	9.39023e+06		5.04253e+07	5.73451e+06		-0.947781	4.44405e-07	2.11746e-06
			Saccharic acid (6TMS)	1.11487e+11	3.83498e+10		1.14554e+11	4.66971e+10		-0.687695	0.0243414	0.042862
			Dopamine (4TMS)	1.64111e+07	9.80577e+06		1.06718e+08	6.9304e+07		1.98381	1.0726e-07	5.43005e-07
			Octadecatrienoic acid, 9,12,15-(Z,Z,Z)-, n- (1TMS)	7.73838e+09	5.73354e+09		9.44868e+09	6.05502e+09		-0.358481	0.463319	0.528575
			Inositol-1-phosphate, myo- (7TMS)	8.66911e+07	1.45307e+07		1.39187e+08	3.01915e+07		0.0802991	0.630732	0.672228
			Hexadecanoate	4.34022e+07	1.04505e+07		4.53312e+07	1.15586e+07		-0.54645	0.0147582	0.0291555

## Sheet: S26
		Supplemental Table S26. GC-MS analysis of W3d_H150m and E3d_H150m in shoot.
				W3d_H150m			E3d_H150m			E3d_H150m vs W3d_H150m
			annotation	average	SD		average	SD		log2FoldChange	p_value	p_adj
		Amino acid	Alanine, DL- (2TMS)	4.60976e+11	1.39425e+11		6.45306e+11	2.51292e+11		0.469426	0.0727834	0.148807
			Asparagine, DL- (3TMS)	5.15964e+11	2.86462e+11		4.07195e+11	2.8413e+11		-0.461032	0.368679	0.502166
			Aspartate	3.20117e+09	2.42355e+09		2.53013e+09	1.54756e+09		-0.381836	0.396542	0.530962
			Cysteine, DL- (3TMS)	2.7695e+07	2.98995e+07		2.48287e+07	2.81288e+07		-0.282717	0.67654	0.749715
			Glutamate	6.83289e+08	1.17252e+08		1.24592e+09	5.01179e+08		0.855977	0.0017733	0.00875565
			Glutamine, DL- (3TMS)	7.35682e+11	3.81378e+11		9.13746e+11	4.26198e+11		0.247065	0.486855	0.596806
			Glycine	9.55469e+08	5.09269e+08		1.87697e+09	1.09634e+09		0.884388	0.00961872	0.0307549
			Isoleucine	2.08002e+09	6.64956e+08		1.35675e+09	5.14448e+08		-0.688841	0.00275131	0.0114397
			Leucine, DL- (2TMS)	2.0412e+10	4.72404e+09		1.59883e+10	5.71179e+09		-0.424249	0.0734615	0.148807
			Lysine, L- (4TMS)	2.44091e+09	1.39256e+09		1.33998e+09	9.20483e+08		-0.981045	0.030645	0.0806985
			Methionine, DL- (2TMS)	4.27768e+07	2.33258e+07		2.038e+07	1.38702e+07		-1.14416	0.00231183	0.0104137
			Phenylalanine, DL- (2TMS)	5.97306e+09	2.0615e+09		4.9461e+09	2.16726e+09		-0.341209	0.189938	0.300102
			Proline	1.83861e+09	8.80669e+08		2.81533e+09	1.2899e+09		0.538397	0.079989	0.157978
			Serine, DL- (3TMS)	1.09354e+11	3.50397e+10		5.95187e+10	2.49268e+10		-0.944301	3.96329e-05	0.000284636
			Threonine, DL- (3TMS)	6.7416e+10	1.7328e+10		6.32662e+10	2.95623e+10		-0.183797	0.465441	0.593062
			Tryptophan	3.37649e+08	1.49845e+08		3.76944e+08	2.00759e+08		0.0665225	0.830274	0.898515
			Tyrosine, DL- (3TMS)	6.90968e+09	4.27835e+09		3.63099e+09	2.09962e+09		-1.01762	0.00728162	0.0273928
			Valine, DL- (2TMS)	1.66449e+10	4.92201e+09		1.23799e+10	3.97726e+09		-0.490458	0.0146694	0.0429217
			Alanine, 3-cyano-, L- (2TMS)	5.51894e+09	3.4697e+09		4.32949e+09	3.62917e+09		-0.500804	0.351511	0.502166
			Alanine, beta- (3TMS)	9.1616e+08	3.12902e+08		6.82216e+08	2.21546e+08		-0.477451	0.0419649	0.100461
			Cystine, L- (4TMS)	1.98645e+08	1.16012e+08		2.57309e+08	1.163e+08		0.329342	0.33591	0.500695
			Homoserine, DL- (3TMS)	1.30038e+08	5.72236e+07		9.48276e+07	3.96998e+07		-0.533307	0.110731	0.20828
			Pyroglutamate	1.04175e+11	3.66497e+10		1.24098e+11	4.14155e+10		0.194742	0.425212	0.559862
		Amine	Butyric acid, 4-amino- (3TMS)	4.64858e+11	1.8463e+11		2.00123e+11	1.14368e+11		-1.31066	3.50903e-05	0.000277213
			Hydroxylamine (3TMS)	4.0082e+09	4.02023e+08		3.58307e+09	7.35402e+08		-0.222177	0.0604851	0.138635
			Nicotianamine (4TMS)	3.79146e+07	1.93604e+07		3.98895e+07	4.0589e+07		0.066134	0.894964	0.918551
			Ornithine, DL- (4TMS)	2.6785e+09	1.46428e+09		2.72055e+09	1.24024e+09		-0.0188011	0.960334	0.960334
			Putrescine	345164	54649.6		571517	184020		0.711163	0.00805845	0.0287976
			Spermidine (5TMS)	4.86849e+07	1.13892e+07		3.99136e+07	1.08309e+07		-0.305986	0.181319	0.298421
			Tryptamine (3TMS)	6.0143e+07	1.29862e+07		50252624	4.50642e+06		-0.307508	0.0361856	0.0893332
			Tryptamine, 5-hydroxy- (3TMS)	3.36195e+08	1.34934e+08		3.18768e+08	1.7238e+08		-0.158768	0.577161	0.660807
			Tryptamine, 5-hydroxy- (4TMS)	1.40019e+08	7.15194e+07		1.68939e+08	4.37348e+07		0.255293	0.364638	0.502166
		Organic acid	Aconitic acid, cis- (3TMS)	3.52179e+07	2.9705e+07		6.78194e+07	8.38145e+07		0.988888	0.15645	0.268033
			Caffeic acid, trans- (3TMS)	1.65578e+09	3.70852e+08		2.00674e+09	4.77887e+08		0.208321	0.23163	0.3588
			Citric acid (4TMS)	4.59694e+11	1.16259e+11		5.85862e+11	1.58197e+11		0.305497	0.159463	0.268033
			Fumaric acid (2TMS)	2.4644e+09	2.1831e+09		3.31789e+09	2.92563e+09		0.418228	0.474088	0.594491
			Galacturonic acid, D- (1MEOX) (5TMS)	3.88351e+08	2.94741e+08		1.255e+09	1.14706e+09		1.67541	0.00691253	0.0273045
			Glutaric acid (2TMS)	308803	273363		8421.45	8264.38		-5.37168	8.99375e-08	1.42101e-06
			Glutaric acid, 2-oxo- (1MEOX) (2TMS)	7.97683e+07	5.30782e+07		5.70569e+07	3.7481e+07		-0.445225	0.366759	0.502166
			Glyceric acid, DL- (3TMS)	1.84353e+08	1.23747e+08		2.32996e+08	2.00767e+08		0.359849	0.532129	0.6197
			Glycolic acid (2TMS)	8.685e+07	4.53819e+07		1.17024e+08	1.53732e+08		0.313836	0.533412	0.6197
			Isocitric acid, DL- (4TMS)	1.07496e+09	1.27043e+08		1.45662e+09	3.18964e+08		0.42446	0.0359128	0.0893332
			Lactate	4.31657e+08	3.05069e+07		4.42947e+08	6.46017e+07		-0.0132316	0.906924	0.918551
			Malic acid, DL- (3TMS)	5.64822e+11	2.17655e+11		1.13429e+12	6.6071e+11		1.02409	0.011429	0.0347264
			Quinic acid, D(-)- (5TMS)	1.70294e+09	1.08987e+09		4.44192e+09	2.88312e+09		1.31955	0.00124506	0.00655731
			Quinic acid, 3-caffeoyl-, cis- (6TMS)	2.65572e+09	1.33211e+09		3.29581e+09	1.63047e+09		0.232285	0.491043	0.596806
			Quinic acid, 3-caffeoyl-, trans- (6TMS)	8.51184e+07	3.49353e+07		8.63166e+07	6.36057e+07		-0.0510712	0.897407	0.918551
			Shikimic acid (4TMS)	1.79736e+08	7.07691e+07		2.42215e+08	9.52009e+07		0.415804	0.186413	0.300102
			Suberic acid (2TMS)	1.05439e+06	542494		1.21419e+06	1.58091e+06		0.259139	NA	NA
			Succinate	1.21702e+07	4.89706e+06		2.24505e+07	1.01176e+07		0.881459	0.00973258	0.0307549
		Sugar	Fructose, D- (1MEOX) (5TMS)	5.24381e+09	4.945e+09		1.66967e+11	2.39746e+11		5.08756	8.99102e-11	3.55145e-09
			Fructose-6-phosphate	247101	141333		1.56153e+06	843136		2.63255	8.52779e-09	1.68424e-07
			Galactinol (9TMS)	2.75825e+09	6.04067e+08		4.7212e+09	4.31177e+09		0.821891	NA	NA
			Glucose1	2.38945e+08	4.72256e+07		5.0938e+08	3.55608e+08		1.06087	0.00237274	0.0104137
			Glucose-6-phosphate (1MEOX) (6TMS)	7.47823e+07	6.74762e+07		7.25688e+08	5.06553e+08		3.28681	6.87483e-07	7.75874e-06
			Isomaltose (1MEOX) (8TMS)	4.4984e+06	3.66224e+06		3.01471e+06	2.19621e+06		-0.671922	0.134825	0.236694
			Raffinose (11TMS)	520842	366785		375006	315399		-0.543748	0.368136	0.502166
			Ribose, D- (1MEOX) (4TMS)	4.39029e+08	1.54036e+08		2.96202e+08	1.31151e+08		-0.619164	0.0195063	0.0550357
			Sucrose	4.63136e+07	3.94428e+07		5.47117e+08	3.87509e+08		3.54526	2.76033e-09	7.26888e-08
			Trehalose, alpha,alpha'-, D- (8TMS)	1.29532e+08	8.5535e+07		9.7829e+08	5.25855e+08		2.87246	5.94122e-11	3.55145e-09
		Alcohol	Glycerol	3.73971e+08	4.26551e+07		3.09781e+08	4.96857e+07		-0.323465	0.00113917	0.00642816
			Inositol, myo- (6TMS)	3.53368e+11	7.33076e+10		8.05514e+11	3.65214e+11		1.18841	6.43593e-06	6.35548e-05
			Phytol (1TMS)	2.93012e+08	3.61453e+07		3.70402e+08	8.89942e+07		0.293526	0.116907	0.214783
		Other	[Dihydrouracil_2TMS]	1.40677e+08	3.835e+07		1.45456e+08	5.1753e+07		0.0311599	0.905845	0.918551
			Lumichrome (2MEOX)	1.36117e+10	7.08126e+09		4.54107e+09	2.17219e+09		-1.601	1.43448e-05	0.000125916
			Phosphoric acid (3TMS)	1.34454e+12	4.1531e+11		1.20961e+12	3.23243e+11		-0.184389	0.457946	0.593062
			Threonic acid-1,4-lactone (2TMS)	2.03529e+09	6.44682e+08		3.52901e+09	1.46117e+09		0.770374	0.00838411	0.0287976
			Methyltris(trimethylsiloxy)silane	1.03016e+10	8.285e+08		1.02192e+10	1.45421e+09		-0.0546847	0.667051	0.749715
			Pyridine, 2-hydroxy- (1TMS)	3.02599e+08	4.02917e+07		2.62205e+08	3.8163e+07		-0.241965	0.072068	0.148807
			1,3-Propanediol, 2TMS derivative	1.00888e+11	6.06127e+09		1.02831e+11	1.51606e+10		-0.0159685	0.893646	0.918551
			Oxalic acid (2TMS)	2.68969e+09	6.76218e+08		6.35273e+08	5.01119e+08		-2.15612	1.90421e-07	2.50722e-06
			1,4-Butanediol, 2TMS derivative	7.43942e+09	7.93462e+08		6.96038e+09	1.21631e+09		-0.141681	0.312872	0.475324
			Pseudotropine (1TMS)	529118	303663		805020	332053		0.595915	0.131657	0.236385
			Piperidin-2-one, 3-amino- (2TMS)	3.98991e+09	2.56648e+09		5.10576e+09	2.69112e+09		0.293482	0.519499	0.6197
			Threonic acid (4TMS)	1.88352e+10	1.00563e+10		3.34749e+10	2.28745e+10		0.83798	0.0614204	0.138635
			Propane, 1,3-diamino- (4TMS)	2.0132e+08	1.06667e+08		1.94103e+08	8.93339e+07		-0.139287	0.683285	0.749715
			Saccharic acid (6TMS)	7.17872e+10	1.89519e+10		4.95053e+10	2.83898e+10		-0.556969	0.0922332	0.177718
			Dopamine (4TMS)	1.53705e+06	1.77071e+06		8.78578e+06	1.1201e+07		2.58541	0.000146925	0.000967257
			Octadecatrienoic acid, 9,12,15-(Z,Z,Z)-, n- (1TMS)	2.35383e+10	9.5286e+09		1.67738e+10	9.81009e+09		-0.609585	0.0720467	0.148807
			Inositol-1-phosphate, myo- (7TMS)	1.37833e+08	2.93618e+07		9.7553e+07	2.30485e+07		-0.555796	0.000369548	0.00224571
			Hexadecanoate	6.84285e+07	1.91977e+07		5.12827e+07	1.57996e+07		-0.492109	0.0255268	0.0695386

## Sheet: S27
	Supplemental Table S27. GC-MS analysis of W3d_H150m_MGF and E3d_H150m_MGF in leaf at MGF stage.
			W3d_H150m_L			E3d_H150m_L			E3d_H150m_L vs W3d_H150m_L
		annotation	average	SD		average	SD		log2FoldChange	p_value	p_adj
	Amino acid	Alanine, DL- (2TMS)	3.10409e+09	1.99553e+09		3.5549e+09	1.74406e+09		0.800307	0.0615396	0.133939
		Asparagine, DL- (3TMS)	4.70816e+08	3.22421e+08		1.43812e+08	1.03347e+08		-1.22532	0.00642373	0.0365659
		Aspartate	2.19709e+09	9.15807e+08		1.63927e+09	3.57734e+08		0.0046845	0.988056	0.988056
		Cysteine, DL- (3TMS)	2.81938e+07	1.43526e+07		2.03334e+07	1.3721e+07		-0.0181687	0.962473	0.988056
		Glutamate	1.20098e+09	4.54782e+08		8.25092e+08	1.21942e+08		-0.113823	0.619287	0.753855
		Glutamine, DL- (3TMS)	4.01249e+09	1.7013e+09		1.88358e+09	5.09803e+08		-0.635961	0.0194533	0.0752904
		Glycine	8.75298e+07	2.2234e+07		7.18026e+07	2.79252e+07		0.116389	0.582495	0.730587
		Isoleucine	1.32214e+08	6.25897e+07		3.10157e+07	1.14966e+07		-1.64464	9.16318e-13	6.78076e-11
		Leucine, DL- (2TMS)	3.16314e+08	2.87952e+08		3.16175e+07	3.6074e+07		-2.80541	9.16584e-05	0.00113045
		Lysine, L- (4TMS)	4.9199e+07	4.62132e+07		3.77745e+06	2.97765e+06		-3.21612	5.42804e-07	1.00419e-05
		Methionine, DL- (2TMS)	2.68186e+07	1.55934e+07		3.3331e+06	2.98479e+06		-2.64638	7.9304e-08	1.95616e-06
		Phenylalanine, DL- (2TMS)	1.3639e+09	5.03177e+08		9.76059e+08	2.50238e+08		-0.0569381	0.736835	0.869859
		Proline	1.7906e+08	1.29821e+08		7.70369e+07	3.6257e+07		-0.795297	0.0797591	0.16738
		Serine, DL- (3TMS)	1.40424e+10	7.58287e+09		7.35848e+09	3.98708e+09		-0.561109	0.0874618	0.174924
		Threonine, DL- (3TMS)	5.41773e+09	2.23684e+09		2.04415e+09	4.75772e+08		-0.936846	0.000211659	0.00195785
		Tryptophan	2.32218e+08	2.19025e+08		5.47347e+07	5.6956e+07		-1.70294	0.00456209	0.0306904
		Tyrosine, DL- (3TMS)	2.90207e+08	2.36754e+08		5.74741e+07	5.17466e+07		-1.80826	0.000171183	0.00180965
		Valine, DL- (2TMS)	2.00427e+09	6.46164e+08		6.50313e+08	1.7438e+08		-1.17818	3.22423e-09	1.19297e-07
		Alanine, 3-cyano-, L- (2TMS)	7.65903e+07	4.63451e+07		3.01204e+07	2.52005e+07		-0.866157	0.036962	0.0993567
		Alanine, beta- (3TMS)	1.00394e+08	9.47225e+07		3.61219e+07	2.23503e+07		-0.986787	0.0175602	0.0721918
		Cystine, L- (4TMS)	2.22495e+08	1.92207e+08		1.21124e+08	5.59699e+07		-0.407649	0.244187	0.401552
		Homoserine, DL- (3TMS)	4.52509e+06	4.97464e+06		1.88835e+06	1.62178e+06		-0.880074	0.285354	0.424384
		Pyroglutamate	7.76631e+09	2.64932e+09		4.94471e+09	6.47931e+08		-0.227751	0.286746	0.424384
	Amine	Butyric acid, 4-amino- (3TMS)	7.55149e+09	5.26112e+09		5.40706e+09	5.74718e+09		0.0836099	0.872368	0.988056
		Hydroxylamine (3TMS)	2.00134e+09	5.84334e+08		2.44254e+09	6.04804e+08		0.655138	0.0247193	0.0828631
		Nicotianamine (4TMS)	2.09272e+07	1.5807e+07		5.24431e+06	3.82158e+06		-1.57958	0.00333312	0.0246651
		Ornithine, DL- (4TMS)	4.2608e+06	3.0153e+06		5.9033e+06	4.36149e+06		0.999028	0.0452641	0.110476
		Putrescine	363280	153194		322021	89254.3		0.30496	0.276446	NA
		Spermidine (5TMS)	8.96189e+07	3.85126e+07		8.88931e+07	2.39514e+07		0.431044	0.0332493	0.0993567
		Tryptamine (3TMS)	8.508e+07	2.902e+07		6.26723e+07	2.80485e+07		-0.0386485	0.884921	0.988056
		Tryptamine, 5-hydroxy- (3TMS)	6.74744e+08	1.96003e+08		9.25559e+08	4.60697e+08		0.827306	4.15659e-05	0.000615175
		Tryptamine, 5-hydroxy- (4TMS)	5.70076e+08	2.44675e+08		1.04065e+09	1.66763e+09		1.1639	NA	NA
	Organic acid	Aconitic acid, cis- (3TMS)	3.75185e+08	2.41723e+08		5.01725e+08	1.74892e+08		0.78604	0.0814282	0.16738
		Caffeic acid, trans- (3TMS)	1.063e+09	6.50842e+08		1.17151e+09	4.99557e+08		0.605167	0.0463149	0.110476
		Citric acid (4TMS)	6.48533e+11	3.0372e+11		6.19387e+11	1.46008e+11		0.277995	0.449949	0.594576
		Fumaric acid (2TMS)	1.05366e+08	6.40608e+07		7.97065e+07	3.25739e+07		0.0218305	0.950584	0.988056
		Galacturonic acid, D- (1MEOX) (5TMS)	5.47648e+08	4.20456e+08		6.0855e+08	3.44754e+08		0.602026	0.225789	0.394688
		Glutaric acid (2TMS)	456800	668961		40279.7	42517.3		-2.86701	0.00152451	NA
		Glutaric acid, 2-oxo- (1MEOX) (2TMS)	8.74157e+07	2.45194e+07		1.38707e+08	9.19378e+07		0.984054	0.00635195	0.0365659
		Glyceric acid, DL- (3TMS)	7.0593e+08	3.84457e+08		1.03135e+09	7.97178e+08		0.899424	0.0492664	0.110476
		Glycolic acid (2TMS)	5.56282e+07	2.52166e+07		1.0305e+08	1.76307e+08		1.13838	NA	NA
		Isocitric acid, DL- (4TMS)	2.14162e+09	8.29302e+08		2.07485e+09	4.68812e+08		0.420766	0.101316	0.1973
		Lactate	4.26438e+08	3.17317e+07		4.44088e+08	5.08294e+07		0.435612	0.0235998	0.0828631
		Malic acid, DL- (3TMS)	8.68448e+11	2.03584e+11		8.50226e+11	3.81497e+11		0.322692	0.313577	0.437825
		Quinic acid, D(-)- (5TMS)	8.25595e+10	6.41095e+10		1.65956e+11	1.08794e+11		1.25584	0.0371397	0.0993567
		Quinic acid, 3-caffeoyl-, cis- (6TMS)	1.30628e+10	1.1085e+10		2.93752e+10	4.58094e+10		1.56824	NA	NA
		Quinic acid, 3-caffeoyl-, trans- (6TMS)	2.44487e+08	1.62461e+08		5.50856e+08	8.45404e+08		1.5481	0.0113416	0.0493692
		Shikimic acid (4TMS)	4.6451e+08	2.76116e+08		3.50535e+08	1.26021e+08		-0.0112938	0.971741	0.988056
		Suberic acid (2TMS)	1.72278e+07	8.35193e+06		1.97188e+07	9.26775e+06		0.65072	0.036956	0.0993567
		Succinate	4.60938e+06	1.95534e+06		4.09962e+06	1.60632e+06		0.283884	0.236533	0.397806
	Sugar	Fructose, D- (1MEOX) (5TMS)	3.68393e+11	3.00654e+11		2.40741e+11	1.40289e+11		-0.213628	0.621421	0.753855
		Fructose-6-phosphate	1.71666e+06	973014		967068	345153		-0.359221	0.161865	0.292147
		Galactinol (9TMS)	9.99907e+08	4.16624e+08		8.70722e+08	2.99983e+08		0.214454	0.339121	0.464722
		Glucose1	2.25803e+09	1.61003e+09		1.80564e+09	7.58363e+08		0.0444162	0.9111	0.988056
		Glucose-6-phosphate (1MEOX) (6TMS)	8.33494e+08	4.65076e+08		4.83407e+08	2.07844e+08		-0.351548	0.229346	0.394688
		Isomaltose (1MEOX) (8TMS)	7.42084e+07	1.21389e+08		1.88951e+07	1.88857e+07		-1.4108	0.0478209	0.110476
		Raffinose (11TMS)	388982	396243		647454	992111		1.15685	0.235945	NA
		Ribose, D- (1MEOX) (4TMS)	5.92639e+08	1.02369e+09		1.5627e+08	1.65347e+08		-1.33066	0.0375944	0.0993567
		Sucrose	1.09709e+09	4.55773e+08		9.28705e+08	1.91138e+08		0.183569	0.29823	0.432725
		Trehalose, alpha,alpha'-, D- (8TMS)	8.32755e+07	7.72486e+07		1.75196e+08	2.38813e+08		1.40682	0.119031	0.220208
	Alcohol	Glycerol	2.49794e+08	4.69304e+07		1.71922e+08	3.65753e+07		-0.129088	0.388745	0.523039
		Inositol, myo- (6TMS)	1.4864e+12	5.02191e+11		1.09714e+12	3.5672e+11		-0.0130349	0.961343	0.988056
		Phytol (1TMS)	3.07379e+08	9.56171e+07		2.41134e+08	7.36994e+07		0.0696286	0.740556	0.869859
	Other	[Dihydrouracil_2TMS]	4.35255e+08	1.45724e+08		4.54563e+08	4.44205e+08		0.398755	0.257406	0.405278
		Lumichrome (2MEOX)	1.6308e+10	8.83767e+09		1.18443e+10	4.00841e+09		-0.0227568	0.933666	0.988056
		Phosphoric acid (3TMS)	1.08765e+12	1.68986e+11		7.62869e+11	1.93284e+11		-0.116453	0.478132	0.620733
		Threonic acid-1,4-lactone (2TMS)	1.36805e+09	6.36373e+08		1.28235e+09	6.32259e+08		0.287863	0.313392	0.437825
		Methyltris(trimethylsiloxy)silane	9.80417e+09	8.27327e+08		1.08482e+10	2.54116e+09		0.518612	0.00280841	0.0230914
		Pyridine, 2-hydroxy- (1TMS)	2.92475e+08	4.74259e+07		2.66751e+08	6.22985e+07		0.233967	0.104439	0.198166
		1,3-Propanediol, 2TMS derivative	9.94759e+10	9.6703e+09		1.04499e+11	1.17871e+10		0.448816	0.0203488	0.0752904
		Oxalic acid (2TMS)	4.27617e+08	5.31934e+08		2.21282e+08	9.20171e+07		-0.498989	0.283892	0.424384
		1,4-Butanediol, 2TMS derivative	6.64406e+09	7.43127e+08		7.15035e+09	1.26257e+09		0.477348	0.00854292	0.039511
		Pseudotropine (1TMS)	89730	53628.9		75972.5	37910.9		0.0900196	0.863838	NA
		Piperidin-2-one, 3-amino- (2TMS)	1.23362e+06	654654		543438	389613		-0.754309	0.256417	0.405278
		Threonic acid (4TMS)	5.27965e+09	2.57997e+09		4.06195e+09	3.15588e+09		0.0190776	0.963437	0.988056
		Propane, 1,3-diamino- (4TMS)	1.06133e+07	1.08451e+06		8.09019e+06	1.73431e+06		0.00453162	0.984786	0.988056
		Saccharic acid (6TMS)	2.96833e+09	1.79917e+09		1.12482e+09	7.90862e+08		-1.0977	0.00761488	0.0379169
		Dopamine (4TMS)	9.99337e+06	7.61622e+06		1.84629e+07	1.63864e+07		1.22633	0.0257547	0.0828631
		Octadecatrienoic acid, 9,12,15-(Z,Z,Z)-, n- (1TMS)	1.03879e+10	8.11232e+09		1.27934e+10	7.50047e+09		0.781341	0.0454235	0.110476
		Inositol-1-phosphate, myo- (7TMS)	2.63174e+08	1.20505e+08		1.77706e+08	6.79594e+07		-0.137777	0.517738	0.660562
		Hexadecanoate	6.13505e+07	1.93322e+07		6.08276e+07	1.2392e+07		0.449003	0.00768586	0.0379169

## Sheet: S28
		Supplemental Table S28. GC-MS analysis of W3d_H150m_MGF and E3d_H150m_MGF in MGF.
				W3d_H150m_MGF			E3d_H150m_MGF			E3d_H150m_MGF vs W3d_H150m_MGF
			annotation	average	SD		average	SD		log2FoldChange	p_value	p_adj
		Amino acid	Alanine, DL- (2TMS)	1.19826e+10	5.77435e+09		6.50693e+09	2.96926e+09		-0.458367	0.132739	0.288681
			Asparagine, DL- (3TMS)	1.8942e+10	1.34073e+10		2.31987e+10	1.37944e+10		0.704942	0.138859	0.288681
			Aspartate	1.31117e+09	3.16521e+08		1.1228e+09	3.78088e+08		0.170373	0.375757	0.549719
			Cysteine, DL- (3TMS)	9.10984e+06	4.15958e+06		1.12941e+07	7.90975e+06		0.67954	0.0604999	0.250868
			Glutamate	6.03167e+08	1.52936e+08		4.02463e+08	1.09147e+08		-0.160053	0.215554	0.396017
			Glutamine, DL- (3TMS)	1.43752e+11	8.18045e+10		1.67475e+11	9.77873e+10		0.623023	0.101634	0.284668
			Glycine	2.32276e+08	8.94704e+07		1.90532e+08	7.90411e+07		0.113547	0.622476	0.793155
			Isoleucine	8.37792e+08	3.94078e+08		3.65348e+08	2.09681e+08		-0.809107	0.0146427	0.193234
			Leucine, DL- (2TMS)	4.62912e+09	3.54222e+09		1.67496e+09	1.09058e+09		-1.06711	0.0238561	0.193234
			Lysine, L- (4TMS)	1.10914e+09	8.59822e+08		1.14657e+09	1.62902e+09		0.346886	0.607409	0.786644
			Methionine, DL- (2TMS)	6.38279e+08	4.83789e+08		2.81857e+08	3.28536e+08		-0.804609	0.148079	0.293328
			Phenylalanine, DL- (2TMS)	5.04418e+09	3.00653e+09		2.40035e+09	8.69807e+08		-0.647868	0.0261234	0.193234
			Proline	4.44984e+08	5.96027e+08		1.2937e+08	1.00492e+08		-1.2503	0.0185093	0.193234
			Serine, DL- (3TMS)	2.85838e+10	1.50154e+10		1.50951e+10	7.26679e+09		-0.476097	0.0740716	0.265984
			Threonine, DL- (3TMS)	9.64374e+09	3.35451e+09		7.29357e+09	3.13444e+09		-0.00653659	0.979023	0.993449
			Tryptophan	7.43583e+07	3.55708e+07		3.56628e+07	3.90397e+07		-0.74655	0.110401	0.284668
			Tyrosine, DL- (3TMS)	2.26963e+09	8.62938e+08		1.36804e+09	1.94572e+09		-0.428612	0.405955	0.583098
			Valine, DL- (2TMS)	8.48644e+09	3.951e+09		5.15475e+09	2.30808e+09		-0.313479	0.283785	0.467063
			Alanine, 3-cyano-, L- (2TMS)	3.76904e+08	2.12313e+08		3.93339e+08	2.21786e+08		0.460633	0.253933	0.445793
			Alanine, beta- (3TMS)	5.15398e+09	2.50061e+09		3.61929e+09	1.032e+09		-0.066356	0.783979	0.877954
			Cystine, L- (4TMS)	2.45222e+08	6.25494e+07		2.03994e+08	7.1776e+07		0.167477	0.341573	0.518928
			Homoserine, DL- (3TMS)	4.89566e+07	1.87349e+07		3.40544e+07	1.47203e+07		-0.171536	0.527846	0.718962
			Pyroglutamate	3.6005e+10	1.80883e+10		3.97005e+10	1.89682e+10		0.54313	0.0893012	0.279207
		Amine	Butyric acid, 4-amino- (3TMS)	5.98166e+11	1.21757e+11		6.98586e+11	1.62878e+11		0.624534	0.000234378	0.00925792
			Hydroxylamine (3TMS)	3.07492e+09	5.66119e+08		3.25252e+09	4.9646e+08		0.471681	0.0279776	0.193234
			Nicotianamine (4TMS)	1.56448e+08	5.57217e+07		9.06907e+07	2.33059e+07		-0.344333	0.0351053	0.213332
			Ornithine, DL- (4TMS)	5.79493e+07	4.52179e+07		3.61757e+07	3.51623e+07		-0.30225	0.656997	0.798505
			Putrescine	250688	77804.9		256253	65267.2		0.448165	0.0411834	0.228127
			Spermidine (5TMS)	4.85752e+07	1.8279e+07		2.94736e+07	1.17848e+07		-0.299205	0.138036	0.288681
			Tryptamine (3TMS)	1.84777e+08	6.78695e+07		1.41296e+08	3.91657e+07		0.0590397	0.789047	0.877954
			Tryptamine, 5-hydroxy- (3TMS)	1.1338e+08	5.65492e+07		1.02727e+08	1.19382e+08		0.174647	NA	NA
			Tryptamine, 5-hydroxy- (4TMS)	2.17981e+07	1.03633e+07		1.31701e+07	7.79317e+06		-0.353784	0.276787	0.465237
		Organic acid	Aconitic acid, cis- (3TMS)	2.7781e+08	9.10912e+07		2.26438e+08	6.36858e+07		0.101159	0.640241	0.796436
			Caffeic acid, trans- (3TMS)	1.66952e+08	1.17717e+08		2.3131e+08	2.28181e+08		0.84593	0.118809	0.284668
			Citric acid (4TMS)	1.62367e+12	3.33717e+11		1.33292e+12	2.46059e+11		0.151258	0.359988	0.536585
			Fumaric acid (2TMS)	9.48252e+07	2.96194e+07		7.5226e+07	2.35371e+07		0.0998779	0.672279	0.804697
			Galacturonic acid, D- (1MEOX) (5TMS)	4.80986e+10	2.65778e+10		2.88684e+10	1.91851e+10		-0.29802	0.566875	0.746385
			Glutaric acid (2TMS)	3974.71	2774.3		8681.21	12154.6		1.7219	0.260309	0.447052
			Glutaric acid, 2-oxo- (1MEOX) (2TMS)	1.78803e+08	4.22815e+07		1.08192e+08	6.05228e+07		-0.346736	0.234535	0.421097
			Glyceric acid, DL- (3TMS)	2.32655e+07	1.31825e+07		1.1372e+07	4.57884e+06		-0.576169	0.091891	0.279207
			Glycolic acid (2TMS)	5.4633e+07	1.42375e+07		4.91459e+07	1.5635e+07		0.258809	0.323861	0.501667
			Isocitric acid, DL- (4TMS)	1.93602e+09	4.14952e+08		1.96939e+09	2.79857e+08		0.41749	0.019691	0.193234
			Lactate	4.36042e+08	6.21153e+07		4.21894e+08	4.18156e+07		0.35859	0.0435459	0.228127
			Malic acid, DL- (3TMS)	1.44625e+12	2.78658e+11		1.27305e+12	1.98694e+11		0.239412	0.171896	0.323328
			Quinic acid, D(-)- (5TMS)	7.17536e+10	4.55353e+10		5.07068e+10	2.6322e+10		-0.0700207	0.847285	0.916925
			Quinic acid, 3-caffeoyl-, cis- (6TMS)	2.83373e+09	2.57522e+09		1.82417e+09	9.3053e+08		-0.188828	0.645214	0.796436
			Quinic acid, 3-caffeoyl-, trans- (6TMS)	5.73013e+08	2.69268e+08		3.06448e+08	1.01348e+08		-0.46287	0.0794983	0.273059
			Shikimic acid (4TMS)	1.78741e+09	1.13752e+09		6.92208e+08	5.40838e+08		-0.923659	0.0225672	0.193234
			Suberic acid (2TMS)	6.37738e+06	3.49792e+06		5.09051e+06	2.88848e+06		0.0497401	0.908915	0.957391
			Succinate	6.506e+06	2.42482e+06		3.44067e+06	1.49097e+06		-0.486355	0.0473178	0.228127
		Sugar	Fructose, D- (1MEOX) (5TMS)	2.25967e+12	5.34198e+11		2.21742e+12	4.89218e+11		0.40531	0.0519782	0.228127
			Fructose-6-phosphate	2.63081e+06	836580		1.60587e+06	449712		-0.283877	0.115686	0.284668
			Galactinol (9TMS)	8.85828e+09	2.69686e+09		4.58644e+09	1.87874e+09		-0.514782	0.029352	0.193234
			Glucose1	2.83087e+10	6.10989e+09		2.6576e+10	4.80638e+09		0.333713	0.063511	0.250868
			Glucose-6-phosphate (1MEOX) (6TMS)	1.49372e+09	5.1523e+08		9.2018e+08	1.6671e+08		-0.256931	0.138644	0.288681
			Isomaltose (1MEOX) (8TMS)	2.39474e+06	1.61927e+06		1.25786e+06	1.26331e+06		-0.576516	0.322087	0.501667
			Raffinose (11TMS)	610636	717396		601396	856849		0.369921	0.70383	0.826046
			Ribose, D- (1MEOX) (4TMS)	1.4174e+08	2.93781e+07		1.58536e+08	5.00766e+07		0.554811	2.32449e-05	0.00183635
			Sucrose	1.49189e+09	5.97881e+08		1.11539e+09	5.58494e+08		-0.00304876	0.991249	0.993449
			Trehalose, alpha,alpha'-, D- (8TMS)	1.03677e+07	1.78316e+07		1.3275e+07	1.9525e+07		0.796664	0.311318	0.501667
		Alcohol	Glycerol	8.98305e+07	1.4034e+07		6.76709e+07	1.56996e+07		-0.00722799	0.956621	0.993449
			Inositol, myo- (6TMS)	6.90357e+11	3.22519e+11		5.02651e+11	2.08284e+11		-0.0342398	0.903731	0.957391
			Phytol (1TMS)	1.38224e+07	2.75806e+07		6.13741e+06	3.17166e+06		-0.764507	NA	NA
		Other	[Dihydrouracil_2TMS]	5.33015e+08	1.2576e+08		3.56554e+08	7.07084e+07		-0.177376	0.486058	0.673659
			Lumichrome (2MEOX)	9.61934e+09	2.44471e+09		6.44037e+09	2.02014e+09		-0.181211	0.423365	0.597247
			Phosphoric acid (3TMS)	4.7267e+11	7.41822e+10		3.67113e+11	8.04509e+10		0.0306845	0.832001	0.91289
			Threonic acid-1,4-lactone (2TMS)	1.94092e+09	4.08118e+08		1.46499e+09	3.35301e+08		-0.00118296	0.993449	0.993449
			Methyltris(trimethylsiloxy)silane	1.04416e+10	1.33609e+09		9.80731e+09	8.99516e+08		0.312933	0.0883382	0.279207
			Pyridine, 2-hydroxy- (1TMS)	2.88474e+08	6.12588e+07		2.22506e+08	1.9014e+07		0.0545824	0.720375	0.826046
			1,3-Propanediol, 2TMS derivative	1.01367e+11	9.64973e+09		1.02171e+11	1.26647e+10		0.412612	0.0205057	0.193234
			Oxalic acid (2TMS)	1.50268e+09	7.06634e+08		1.68568e+09	6.28967e+08		0.541231	0.104489	0.284668
			1,4-Butanediol, 2TMS derivative	7.07884e+09	6.35663e+08		6.61284e+09	7.86362e+08		0.306527	0.0700369	0.263472
			Pseudotropine (1TMS)	165159	86366.6		116133	22724.4		-0.138901	0.721483	0.826046
			Piperidin-2-one, 3-amino- (2TMS)	4.66537e+07	3.20036e+07		5.7092e+07	5.16383e+07		0.675078	0.14852	0.293328
			Threonic acid (4TMS)	8.3185e+09	3.16123e+09		4.28573e+09	2.77739e+09		-0.51908	0.155339	0.299313
			Propane, 1,3-diamino- (4TMS)	3.90188e+07	1.80522e+07		4.20364e+07	1.50685e+07		0.522283	0.0514516	0.228127
			Saccharic acid (6TMS)	2.96003e+09	1.16764e+09		1.00651e+09	4.06313e+08		-1.07585	0.000490619	0.0129196
			Dopamine (4TMS)	166139	250252		41529.2	34728.5		-1.50492	0.136758	0.288681
			Octadecatrienoic acid, 9,12,15-(Z,Z,Z)-, n- (1TMS)	8.01951e+09	6.57991e+09		8.23006e+09	7.53205e+09		0.345991	0.546686	0.732003
			Inositol-1-phosphate, myo- (7TMS)	1.62177e+08	4.11637e+07		1.04988e+08	2.15386e+07		-0.193969	0.118912	0.284668
			Hexadecanoate	5.81342e+07	1.46967e+07		5.73684e+07	1.85061e+07		0.358616	0.105393	0.284668

## Sheet: S29
		Supplemental Table S29. GC-MS analysis of W3d_H150m_MRF and E3d_H150m_MRF in MRF.
				W3d_H150m_MRF			E3d_H150m_MRF			E3d_H150m_MRF vs W3d_H150m_MRF
			annotation	average	SD		average	SD		log2FoldChange	p_value	p_adj
		Amino acid	Alanine, DL- (2TMS)	1.68726e+10	1.33928e+10		1.88633e+10	1.29605e+10		0.0740364	0.908382	0.998124
			Asparagine, DL- (3TMS)	8.51073e+08	5.3526e+08		4.59609e+09	6.39557e+09		2.05003	0.0103556	0.198022
			Aspartate	5.18285e+09	5.48464e+09		2.77194e+10	2.31908e+10		2.08553	0.015033	0.198022
			Cysteine, DL- (3TMS)	3.92692e+09	5.34785e+09		3.08426e+09	2.07656e+09		-0.35367	0.627029	0.949778
			Glutamate	2.42414e+08	1.11269e+08		6.36573e+08	3.90027e+08		1.17193	0.0130799	0.198022
			Glutamine, DL- (3TMS)	5.07683e+09	2.36446e+09		1.25813e+10	9.2385e+09		0.984621	0.0273018	0.247146
			Glycine	2.63544e+08	2.77307e+08		2.62332e+08	1.78169e+08		0.0237311	0.969865	0.998124
			Isoleucine	2.31234e+08	3.06955e+08		2.03949e+08	1.47622e+08		-0.123522	0.877916	0.998124
			Leucine, DL- (2TMS)	2.85367e+09	4.41309e+09		2.78169e+09	2.53294e+09		0.0558482	0.956642	0.998124
			Lysine, L- (4TMS)	1.42556e+09	1.62765e+09		3.89397e+09	3.08533e+09		1.3606	0.236146	0.746277
			Methionine, DL- (2TMS)	8.65032e+07	7.16318e+07		1.60778e+08	1.11581e+08		0.756654	0.217983	0.746277
			Phenylalanine, DL- (2TMS)	1.18471e+09	9.99129e+08		2.04993e+09	1.30528e+09		0.71708	0.265573	0.746277
			Proline	1.56695e+08	6.51935e+07		2.7403e+08	2.22912e+08		0.685723	0.21954	0.746277
			Serine, DL- (3TMS)	3.11823e+09	1.79697e+09		3.43328e+09	2.35068e+09		-0.0775679	0.859794	0.998124
			Threonine, DL- (3TMS)	1.33303e+09	8.8118e+08		2.3269e+09	1.4293e+09		0.67267	0.221278	0.746277
			Tryptophan	4.36837e+07	1.71506e+07		7.25701e+07	5.1281e+07		0.503182	0.266723	0.746277
			Tyrosine, DL- (3TMS)	4.68761e+09	6.7717e+09		4.51611e+09	3.9024e+09		0.00642705	0.995667	0.998124
			Valine, DL- (2TMS)	1.10296e+09	1.45482e+09		1.01333e+09	6.71961e+08		-0.0952471	0.902849	0.998124
			Alanine, 3-cyano-, L- (2TMS)	2.9816e+07	1.62602e+07		3.93621e+07	4.25463e+07		0.153458	0.77237	0.998124
			Alanine, beta- (3TMS)	4.04805e+08	7.97113e+08		6.50016e+07	5.58767e+07		-2.38552	NA	NA
			Cystine, L- (4TMS)	3.90365e+08	1.12058e+08		4.0499e+08	1.72016e+08		-0.017243	0.94976	0.998124
			Homoserine, DL- (3TMS)	1.01665e+07	1.4022e+07		1.04432e+07	9.75067e+06		-0.0686626	0.930481	0.998124
			Pyroglutamate	3.15011e+09	1.14988e+09		8.57183e+09	6.06178e+09		1.16081	0.0251393	0.247146
		Amine	Butyric acid, 4-amino- (3TMS)	1.26552e+10	1.25049e+10		5.11193e+10	5.24796e+10		1.85294	0.0376173	0.247146
			Hydroxylamine (3TMS)	3.92427e+09	5.16251e+08		3.31278e+09	4.87704e+08		-0.329937	0.248709	0.746277
			Nicotianamine (4TMS)	3.3367e+07	1.23186e+07		5.44125e+07	2.98558e+07		0.470612	0.327326	0.816516
			Ornithine, DL- (4TMS)	2.24164e+08	4.41612e+08		1.2539e+08	3.04117e+08		-0.689513	NA	NA
			Putrescine	671149	235826		1.76058e+06	885608		1.2665	0.00014888	0.0114638
			Spermidine (5TMS)	1.68487e+07	4.32437e+06		2.09575e+07	9.95864e+06		0.228984	0.568064	0.949778
			Tryptamine (3TMS)	4.08855e+08	1.72958e+08		5.03461e+08	1.56648e+08		0.142896	0.695579	0.998124
			Tryptamine, 5-hydroxy- (3TMS)	2.21628e+08	6.45321e+07		1.46607e+08	4.92328e+07		-0.683743	0.0154303	0.198022
			Tryptamine, 5-hydroxy- (4TMS)	5.51929e+07	2.32984e+07		6.9036e+07	3.32769e+07		0.0986461	0.826439	0.998124
		Organic acid	Aconitic acid, cis- (3TMS)	4.81843e+08	2.06839e+08		4.49503e+08	2.90427e+08		-0.0239201	0.9701	0.998124
			Caffeic acid, trans- (3TMS)	1.04716e+09	4.77284e+08		1.15891e+09	7.4995e+08		-0.0586113	0.911028	0.998124
			Citric acid (4TMS)	1.78777e+12	2.17025e+11		1.81882e+12	2.06709e+11		-0.0172344	0.951801	0.998124
			Fumaric acid (2TMS)	3.1048e+07	1.63418e+07		3.66278e+07	1.90799e+07		0.0944452	0.853707	0.998124
			Galacturonic acid, D- (1MEOX) (5TMS)	1.86335e+11	1.01516e+11		1.62089e+11	1.08394e+11		-0.341962	0.372712	0.885658
			Glutaric acid (2TMS)	4432.5	8037.8		503	467.767		-1.20764	0.467902	0.923806
			Glutaric acid, 2-oxo- (1MEOX) (2TMS)	3.58694e+07	5.30668e+07		3.93174e+07	3.32641e+07		0.466421	0.566546	0.949778
			Glyceric acid, DL- (3TMS)	1.21166e+07	8.66829e+06		1.25493e+07	1.06786e+07		-0.0913926	0.843549	0.998124
			Glycolic acid (2TMS)	4.43047e+07	1.12618e+07		7.87114e+07	8.21882e+07		0.710447	0.1422	0.711669
			Isocitric acid, DL- (4TMS)	1.06868e+09	3.16516e+08		1.13507e+09	3.47405e+08		0.025409	0.926083	0.998124
			Lactate	5.09757e+08	8.70819e+07		4.29202e+08	1.98331e+07		-0.263857	0.276532	0.746277
			Malic acid, DL- (3TMS)	1.17025e+11	7.07666e+10		9.80617e+10	3.93946e+10		-0.310354	0.607768	0.949778
			Quinic acid, D(-)- (5TMS)	7.74248e+10	1.90086e+10		5.57893e+10	9.28919e+09		-0.526515	0.0385163	0.247146
			Quinic acid, 3-caffeoyl-, cis- (6TMS)	1.82932e+08	6.29077e+07		2.21874e+08	1.04345e+08		0.315625	0.515598	0.935974
			Quinic acid, 3-caffeoyl-, trans- (6TMS)	1.56518e+07	6.85509e+06		2.88772e+07	2.25858e+07		0.948492	0.184637	0.746277
			Shikimic acid (4TMS)	6.1445e+07	1.47256e+07		5.43677e+07	1.76638e+07		-0.230551	0.428887	0.885658
			Suberic acid (2TMS)	7.36009e+06	3.66864e+06		9.27113e+06	7.81574e+06		0.493518	0.503574	0.935974
			Succinate	1.39294e+06	1.11545e+06		1.11765e+06	305442		-0.293272	0.426705	0.885658
		Sugar	Fructose, D- (1MEOX) (5TMS)	1.94978e+12	3.72654e+11		2.05084e+12	7.13862e+11		0.000799759	0.998124	0.998124
			Fructose-6-phosphate	1.57576e+06	396456		1.64629e+06	516210		-0.0225147	0.904152	0.998124
			Galactinol (9TMS)	2.30269e+08	1.22809e+08		1.79271e+08	4.92615e+07		-0.323958	0.414443	0.885658
			Glucose1	3.39796e+10	6.58484e+09		3.5835e+10	1.09937e+10		0.0722193	0.856585	0.998124
			Glucose-6-phosphate (1MEOX) (6TMS)	4.29041e+08	1.0506e+08		4.82366e+08	1.90145e+08		0.0668496	0.746298	0.998124
			Isomaltose (1MEOX) (8TMS)	3.24471e+09	6.10864e+09		1.28516e+09	7.37148e+08		-1.11701	0.220282	0.746277
			Raffinose (11TMS)	453751	720969		240641	420510		-1.25434	0.496257	0.935974
			Ribose, D- (1MEOX) (4TMS)	9.03181e+08	1.16559e+09		4.99921e+08	1.72854e+08		-0.72716	0.186432	0.746277
			Sucrose	1.5083e+09	1.30643e+09		1.02933e+09	5.89349e+08		-0.295055	0.617826	0.949778
			Trehalose, alpha,alpha'-, D- (8TMS)	80989	115536		3.81921e+06	7.78801e+06		5.9807	NA	NA
		Alcohol	Glycerol	5.04867e+07	1.178e+07		3.36062e+07	7.56643e+06		-0.59748	0.0420077	0.248815
			Inositol, myo- (6TMS)	3.14227e+11	8.132e+10		2.26603e+11	8.01076e+10		-0.493205	0.147879	0.711669
			Phytol (1TMS)	537446	750529		533625	768527		-0.269383	0.884997	0.998124
		Other	[Dihydrouracil_2TMS]	2.16782e+08	5.27882e+07		1.49919e+08	5.65835e+07		-0.620562	0.0904595	0.497527
			Lumichrome (2MEOX)	9.8032e+08	4.60829e+08		9.71202e+08	6.39927e+08		-0.00419541	0.993702	0.998124
			Phosphoric acid (3TMS)	2.81018e+11	6.68733e+10		1.85307e+11	5.18472e+10		-0.621414	0.0329753	0.247146
			Threonic acid-1,4-lactone (2TMS)	9.79532e+06	2.09471e+07		4.25926e+06	9.02651e+06		-0.932474	NA	NA
			Methyltris(trimethylsiloxy)silane	1.22159e+10	1.57293e+09		1.01297e+10	1.13896e+09		-0.309176	0.232547	0.746277
			Pyridine, 2-hydroxy- (1TMS)	4.45198e+08	1.22369e+08		4.00694e+08	5.83696e+07		-0.119958	0.708305	0.998124
			1,3-Propanediol, 2TMS derivative	1.13929e+11	1.18024e+10		1.01543e+11	9.7998e+09		-0.206901	0.328727	0.816516
			Oxalic acid (2TMS)	2.64985e+08	2.25303e+08		1.97096e+08	9.69404e+07		-0.328179	0.522687	0.935974
			1,4-Butanediol, 2TMS derivative	7.72186e+09	8.65505e+08		6.79032e+09	6.78016e+08		-0.21926	0.410642	0.885658
			Pseudotropine (1TMS)	219265	156888		347952	453092		0.480263	0.437078	0.885658
			Piperidin-2-one, 3-amino- (2TMS)	1.0243e+07	1.07732e+07		3.45153e+07	2.49058e+07		1.62761	0.0312505	0.247146
			Threonic acid (4TMS)	2.51334e+08	5.38962e+07		1.96564e+08	1.79036e+08		-0.542544	0.281065	0.746277
			Propane, 1,3-diamino- (4TMS)	1.3234e+07	4.01725e+06		1.35564e+07	7.07991e+06		-0.166035	0.71144	0.998124
			Saccharic acid (6TMS)	4.92491e+08	1.89108e+08		5.4979e+08	2.09036e+08		0.210242	0.61763	0.949778
			Dopamine (4TMS)	1.18592e+07	1.18688e+07		3.97792e+06	1.6426e+06		-1.50868	0.00345223	0.132911
			Octadecatrienoic acid, 9,12,15-(Z,Z,Z)-, n- (1TMS)	8.29457e+09	4.72495e+09		7.43904e+09	6.2048e+09		-0.309284	0.629074	0.949778
			Inositol-1-phosphate, myo- (7TMS)	6.16987e+07	1.96433e+07		7.72628e+07	1.47193e+07		0.231711	0.413343	0.885658
			Hexadecanoate	5.67576e+07	1.292e+07		5.2705e+07	2.29915e+07		-0.191096	0.626928	0.949778
