# Supplementary material for: Application of ethanol alleviates heat damage to leaf growth and yield in tomato
Source: Front Plant Sci. 2024 Feb 19;15:1325365. doi: 10.3389/fpls.2024.1325365 (PMC10909983; doi:10.3389/fpls.2024.1325365)
Supplement: Supplementary file 13 [file Table_12.xlsx]

## Sheet: S30
	Supplemental Table S30. Metabolite content differences between W3d and E3d in shoot (log2 fold change ≧ 1.0 or ≦ -1.0, p_value < 0.05, p_adj < 0.05).
		W3d			E3d			E3d vs W3d
	final annotation	average	SD		average	SD		log2FoldChange	p_value	p_adj
	Serine, DL- (3TMS)	4.09777e+10	2.80162e+10		1.81828e+10	1.09061e+10		-1.24413	0.000945457	0.038291
	Glucose	1.88857e+09	1.27465e+09		4.7489e+09	1.67435e+09		1.24111	0.000654316	0.038291

## Sheet: S31
	Supplemental Table S31. Metabolite content differences between W3d and E3d in root (log2 fold change ≧ 1.0 or ≦ -1.0, p_value < 0.05, p_adj < 0.05).
		W3d			E3d			E3d vs W3d
	final annotation	average	SD		average	SD		log2FoldChange	p_value	p_adj
	Threonic acid (4TMS)	1.6016e+08	4.69683e+07		5.73141e+08	2.11028e+08		1.70769	7.05215e-13	5.50067e-11
	Cysteine, DL- (3TMS)	6.99452e+06	3.19938e+06		3.85417e+07	4.30688e+07		2.24302	7.24378e-09	2.82508e-07
	Fructose, D- (1MEOX) (5TMS)	4.39513e+11	2.42746e+11		1.08114e+12	5.29329e+11		1.24657	0.00023718	0.0037
	Dopamine (4TMS)	2.17632e+07	7.63868e+06		6.15762e+07	4.41499e+07		1.27905	0.000360327	0.00468424
	Trehalose, alpha,alpha'-, D- (8TMS)	4.09327e+06	4.2822e+06		1.53897e+07	9.13026e+06		1.88664	0.00144157	0.0140553
	Isomaltose (1MEOX) (8TMS)	2.19011e+07	7.22986e+06		6.14662e+07	3.50484e+07		1.39327	3.53107e-08	9.18079e-07
	Glucose	2.30326e+09	9.82551e+08		6.49931e+09	3.457e+09		1.3959	7.76873e-06	0.00015149
	Citric acid (4TMS)	8.72392e+10	4.6661e+10		4.48031e+10	1.86006e+10		-1.0896	0.00236218	0.018425

## Sheet: S32
	Supplemental Table S32. Metabolite content differences between W3d_H150m and E3d_H150m in shoot (log2 fold change ≧ 1.0 or ≦ -1.0, p_value < 0.05, p_adj < 0.05).
		W3d_H150m			E3d_H150m			E3d_H150m vs W3d_H150m
	final annotation	average	SD		average	SD		log2FoldChange	p_value	p_adj
	Malic acid, DL- (3TMS)	5.64822e+11	2.17655e+11		1.13429e+12	6.6071e+11		1.02409	0.011429	0.0347264
	Quinic acid, D(-)- (5TMS)	1.70294e+09	1.08987e+09		4.44192e+09	2.88312e+09		1.31955	0.00124506	0.00655731
	Fructose, D- (1MEOX) (5TMS)	5.24381e+09	4.945e+09		1.66967e+11	2.39746e+11		5.08756	8.99102e-11	3.55145e-09
	Galacturonic acid, D- (1MEOX) (5TMS)	3.88351e+08	2.94741e+08		1.255e+09	1.14706e+09		1.67541	0.00691253	0.0273045
	Dopamine (4TMS)	1.53705e+06	1.77071e+06		8.78578e+06	1.1201e+07		2.58541	0.000146925	0.000967257
	Inositol, myo- (6TMS)	3.53368e+11	7.33076e+10		8.05514e+11	3.65214e+11		1.18841	6.43593e-06	6.35548e-05
	Glucose-6-phosphate (1MEOX) (6TMS)	7.47823e+07	6.74762e+07		7.25688e+08	5.06553e+08		3.28681	6.87483e-07	7.75874e-06
	Trehalose, alpha,alpha'-, D- (8TMS)	1.29532e+08	8.5535e+07		9.7829e+08	5.25855e+08		2.87246	5.94122e-11	3.55145e-09
	Glucose	2.38945e+08	4.72256e+07		5.0938e+08	3.55608e+08		1.06087	0.00237274	0.0104137
	Sucrose	4.63136e+07	3.94428e+07		5.47117e+08	3.87509e+08		3.54526	2.76033e-09	7.26888e-08
	Fructose-6-phosphate	247101	141333		1.56153e+06	843136		2.63255	8.52779e-09	1.68424e-07
	Oxalic acid (2TMS)	2.68969e+09	6.76218e+08		6.35273e+08	5.01119e+08		-2.15612	1.90421e-07	2.50722e-06
	Lumichrome (2MEOX)	1.36117e+10	7.08126e+09		4.54107e+09	2.17219e+09		-1.601	1.43448e-05	0.000125916
	Glutaric acid (2TMS)	308803	273363		8421.45	8264.38		-5.37168	8.99375e-08	1.42101e-06
	Methionine, DL- (2TMS)	4.27768e+07	2.33258e+07		2.038e+07	1.38702e+07		-1.14416	0.00231183	0.0104137
	Butyric acid, 4-amino- (3TMS)	4.64858e+11	1.8463e+11		2.00123e+11	1.14368e+11		-1.31066	3.50903e-05	0.000277213
	Tyrosine, DL- (3TMS)	6.90968e+09	4.27835e+09		3.63099e+09	2.09962e+09		-1.01762	0.00728162	0.0273928

## Sheet: S33
	Supplemental Table S33. Metabolite content differences between W3d_H150m and E3d_H150m in root (log2 fold change ≧ 1.0 or ≦ -1.0, p_value < 0.05, p_adj < 0.05).
		W3d_H150m			E3d_H150m			E3d_H150m vs W3d_H150m
	final annotation	average	SD		average	SD		log2FoldChange	p_value	p_adj
	Alanine, DL- (2TMS)	4.84966e+08	3.0449e+08		7.7839e+09	1.21233e+10		3.19252	6.30007e-10	8.13375e-09
	[Dihydrouracil_2TMS]	8.83747e+07	1.11971e+08		4.30309e+08	1.78475e+08		1.73243	8.76801e-05	0.000273157
	Glyceric acid, DL- (3TMS)	2.30474e+07	2.54313e+07		1.48334e+08	7.62613e+07		2.09669	6.77248e-06	2.61224e-05
	Pseudotropine (1TMS)	3.11878e+07	6.61255e+07		2.29154e+08	1.09259e+08		2.4882	0.000505039	0.00141063
	Serine, DL- (3TMS)	8.50966e+08	2.98822e+08		3.10496e+09	1.31705e+09		1.22168	7.93769e-08	4.59252e-07
	Threonic acid (4TMS)	7.89492e+07	3.44315e+07		9.01963e+08	5.97119e+08		2.80224	1.54835e-17	4.18055e-16
	Cysteine, DL- (3TMS)	8.11644e+06	3.24279e+06		5.23073e+07	2.92305e+07		2.03673	1.51211e-09	1.3609e-08
	Glutaric acid, 2-oxo- (1MEOX) (2TMS)	1.55448e+10	8.07183e+09		1.25421e+11	5.85811e+10		2.40231	2.79398e-14	4.52626e-13
	Fructose, D- (1MEOX) (5TMS)	1.75062e+10	3.28752e+10		7.69274e+11	4.86342e+11		4.90569	1.16207e-08	8.55708e-08
	Dopamine (4TMS)	1.64111e+07	9.80577e+06		1.06718e+08	6.9304e+07		1.98381	1.0726e-07	5.43005e-07
	Cystine, L- (4TMS)	2.98034e+07	1.76543e+07		1.44749e+08	8.79186e+07		1.57656	8.01537e-06	2.95112e-05
	Glucose-6-phosphate (1MEOX) (6TMS)	2.82925e+06	4.69192e+06		2.03061e+08	1.24198e+08		5.58335	3.1308e-09	2.53594e-08
	Trehalose, alpha,alpha'-, D- (8TMS)	2.98828e+07	1.29682e+07		4.02769e+08	2.94609e+08		3.10032	8.82003e-18	3.57211e-16
	Isomaltose (1MEOX) (8TMS)	3.28966e+07	1.635e+07		1.14805e+08	7.34432e+07		1.19546	8.22932e-05	0.00026663
	Glucose	2.0338e+08	4.19068e+07		3.08334e+09	2.81875e+09		3.11004	8.77151e-15	1.77623e-13
	Sucrose	5.28321e+06	6.49348e+06		3.79473e+08	2.59636e+08		5.52037	9.65044e-21	7.81686e-19
	Putrescine	106265	38413.9		332583	105667		1.00762	0.00124943	0.00306679
	Fructose-6-phosphate	78513.2	24448.4		622208	329315		2.2713	1.29043e-09	1.30656e-08
	Glycolic acid (2TMS)	4.85091e+07	2.86671e+07		3.17183e+07	8.64657e+06		-1.21608	3.19666e-05	0.000107887
	Oxalic acid (2TMS)	6.73132e+09	1.99983e+09		4.37776e+09	1.05417e+09		-1.26827	9.17637e-08	4.95524e-07
	Alanine, 3-cyano-, L- (2TMS)	128338788	4.93533e+07		4.68412e+07	3.21066e+07		-1.99642	7.11677e-08	4.4343e-07
	Asparagine, DL- (3TMS)	5.7414e+09	1.72433e+09		3.29605e+09	1.33938e+09		-1.41211	2.15032e-08	1.45147e-07
	Glutamine, DL- (3TMS)	1.50124e+11	5.33009e+10		1.08808e+11	2.07789e+10		-1.05499	2.69517e-06	1.14899e-05
	Citric acid (4TMS)	9.90827e+10	4.63891e+10		4.43314e+10	1.69553e+10		-1.68997	1.83254e-06	8.24642e-06
	Isoleucine	4.76262e+07	1.97356e+07		2.51184e+07	5.09483e+06		-1.47642	7.02916e-10	8.13375e-09

## Sheet: S34
	Supplemental Table S34. Metabolite content differences between W3d_H150m_MGF and E3d_H150m_MGF in mature green fruits (log2 fold change ≧ 1.0 or ≦ -1.0, p_value < 0.05, p_adj < 0.05).
		W3d_H150m_MGF			E3d_H150m_MGF			E3d_H150m_MGF vs W3d_H150m_MGF
	final annotation	average	SD		average	SD		log2FoldChange	p_value	p_adj
	Saccharic acid (6TMS)	2.96003e+09	1.16764e+09		1.00651e+09	4.06313e+08		-1.07585	0.000490619	0.0129196

## Sheet: S35
	Supplemental Table S35. Metabolite content differences between W3d_H150m_L and E3d_H150m_L in leaf at mature green fruit stage (log2 fold change ≧ 1.0 or ≦ -1.0, p_value < 0.05, p_adj < 0.05).
		W3d_H150m_L			E3d_H150m_L			E3d_H150m_L vs W3d_H150m_L
	final annotation	average	SD		average	SD		log2FoldChange	p_value	p_adj
	Quinic acid, 3-caffeoyl-, trans- (6TMS)	2.44487e+08	1.62461e+08		5.50856e+08	8.45404e+08		1.5481	0.0113416	0.0493692
	Valine, DL- (2TMS)	2.00427e+09	6.46164e+08		6.50313e+08	1.7438e+08		-1.17818	3.22423e-09	1.19297e-07
	Leucine, DL- (2TMS)	3.16314e+08	2.87952e+08		3.16175e+07	3.6074e+07		-2.80541	9.16584e-05	0.00113045
	Methionine, DL- (2TMS)	2.68186e+07	1.55934e+07		3.3331e+06	2.98479e+06		-2.64638	7.9304e-08	1.95616e-06
	Asparagine, DL- (3TMS)	4.70816e+08	3.22421e+08		1.43812e+08	1.03347e+08		-1.22532	0.00642373	0.0365659
	Lysine, L- (4TMS)	4.9199e+07	4.62132e+07		3.77745e+06	2.97765e+06		-3.21612	5.42804e-07	1.00419e-05
	Tyrosine, DL- (3TMS)	2.90207e+08	2.36754e+08		5.74741e+07	5.17466e+07		-1.80826	0.000171183	0.00180965
	Saccharic acid (6TMS)	2.96833e+09	1.79917e+09		1.12482e+09	7.90862e+08		-1.0977	0.00761488	0.0379169
	Nicotianamine (4TMS)	2.09272e+07	1.5807e+07		5.24431e+06	3.82158e+06		-1.57958	0.00333312	0.0246651
	Isoleucine	1.32214e+08	6.25897e+07		3.10157e+07	1.14966e+07		-1.64464	9.16318e-13	6.78076e-11
	Tryptophan	2.32218e+08	2.19025e+08		5.47347e+07	5.6956e+07		-1.70294	0.00456209	0.0306904

## Sheet: S36
	Supplemental Table S36. Metabolite content differences between W3d_H150m_MRF and E3d_H150m_MRF in mature red fruit (log2 fold change ≧ 1.0 or ≦ -1.0, p_value < 0.05, p_adj < 0.05).
		W3d_H150m_MRF			E3d_H150m_MRF			E3d_H150m_MRF vs W3d_H150m_MRF
	final annotation	average	SD		average	SD		log2FoldChange	p_value	p_adj
	Putrescine	671149	235826		1.76058e+06	885608		1.2665	0.00014888	0.0114638
