# Supplementary material for: Application of ethanol alleviates heat damage to leaf growth and yield in tomato
Source: Front Plant Sci. 2024 Feb 19;15:1325365. doi: 10.3389/fpls.2024.1325365 (PMC10909983; doi:10.3389/fpls.2024.1325365)
Supplement: Supplementary file 14 [file Table_13.xlsx]

## Sheet: S37
	Supplemental Table S37. Overview of metabolite content differences (log2 fold change ≧ 1.0 or ≦ -1.0, p_value < 0.05, p_adj < 0.05).
	final annotation	Comparison	Organ	log2FoldChange	p_value	p_adj
	Serine, DL- (3TMS)	E3d vs W3d	shoot	-1.24413	0.000945457	0.038291
	Glucose	E3d vs W3d	shoot	1.24111	0.000654316	0.038291
	Threonic acid (4TMS)	E3d vs W3d	root	1.70769	7.05215e-13	5.50067e-11
	Cysteine, DL- (3TMS)	E3d vs W3d	root	2.24302	7.24378e-09	2.82508e-07
	Fructose, D- (1MEOX) (5TMS)	E3d vs W3d	root	1.24657	0.00023718	0.0037
	Dopamine (4TMS)	E3d vs W3d	root	1.27905	0.000360327	0.00468424
	Trehalose, alpha,alpha'-, D- (8TMS)	E3d vs W3d	root	1.88664	0.00144157	0.0140553
	Isomaltose (1MEOX) (8TMS)	E3d vs W3d	root	1.39327	3.53107e-08	9.18079e-07
	Glucose	E3d vs W3d	root	1.3959	7.76873e-06	0.00015149
	Citric acid (4TMS)	E3d vs W3d	root	-1.0896	0.00236218	0.018425
	Malic acid, DL- (3TMS)	E3d_H150m vs W3d_H150m	shoot	1.02409	0.011429	0.0347264
	Quinic acid, D(-)- (5TMS)	E3d_H150m vs W3d_H150m	shoot	1.31955	0.00124506	0.00655731
	Fructose, D- (1MEOX) (5TMS)	E3d_H150m vs W3d_H150m	shoot	5.08756	8.99102e-11	3.55145e-09
	Galacturonic acid, D- (1MEOX) (5TMS)	E3d_H150m vs W3d_H150m	shoot	1.67541	0.00691253	0.0273045
	Dopamine (4TMS)	E3d_H150m vs W3d_H150m	shoot	2.58541	0.000146925	0.000967257
	Inositol, myo- (6TMS)	E3d_H150m vs W3d_H150m	shoot	1.18841	6.43593e-06	6.35548e-05
	Glucose-6-phosphate (1MEOX) (6TMS)	E3d_H150m vs W3d_H150m	shoot	3.28681	6.87483e-07	7.75874e-06
	Trehalose, alpha,alpha'-, D- (8TMS)	E3d_H150m vs W3d_H150m	shoot	2.87246	5.94122e-11	3.55145e-09
	Glucose	E3d_H150m vs W3d_H150m	shoot	1.06087	0.00237274	0.0104137
	Sucrose	E3d_H150m vs W3d_H150m	shoot	3.54526	2.76033e-09	7.26888e-08
	Fructose-6-phosphate	E3d_H150m vs W3d_H150m	shoot	2.63255	8.52779e-09	1.68424e-07
	Oxalic acid (2TMS)	E3d_H150m vs W3d_H150m	shoot	-2.15612	1.90421e-07	2.50722e-06
	Lumichrome (2MEOX)	E3d_H150m vs W3d_H150m	shoot	-1.601	1.43448e-05	0.000125916
	Glutaric acid (2TMS)	E3d_H150m vs W3d_H150m	shoot	-5.37168	8.99375e-08	1.42101e-06
	Methionine, DL- (2TMS)	E3d_H150m vs W3d_H150m	shoot	-1.14416	0.00231183	0.0104137
	Butyric acid, 4-amino- (3TMS)	E3d_H150m vs W3d_H150m	shoot	-1.31066	3.50903e-05	0.000277213
	Tyrosine, DL- (3TMS)	E3d_H150m vs W3d_H150m	shoot	-1.01762	0.00728162	0.0273928
	Alanine, DL- (2TMS)	E3d_H150m vs W3d_H150m	root	3.19252	6.30007e-10	8.13375e-09
	[Dihydrouracil_2TMS]	E3d_H150m vs W3d_H150m	root	1.73243	8.76801e-05	0.000273157
	Glyceric acid, DL- (3TMS)	E3d_H150m vs W3d_H150m	root	2.09669	6.77248e-06	2.61224e-05
	Pseudotropine (1TMS)	E3d_H150m vs W3d_H150m	root	2.4882	0.000505039	0.00141063
	Serine, DL- (3TMS)	E3d_H150m vs W3d_H150m	root	1.22168	7.93769e-08	4.59252e-07
	Threonic acid (4TMS)	E3d_H150m vs W3d_H150m	root	2.80224	1.54835e-17	4.18055e-16
	Cysteine, DL- (3TMS)	E3d_H150m vs W3d_H150m	root	2.03673	1.51211e-09	1.3609e-08
	Glutaric acid, 2-oxo- (1MEOX) (2TMS)	E3d_H150m vs W3d_H150m	root	2.40231	2.79398e-14	4.52626e-13
	Fructose, D- (1MEOX) (5TMS)	E3d_H150m vs W3d_H150m	root	4.90569	1.16207e-08	8.55708e-08
	Dopamine (4TMS)	E3d_H150m vs W3d_H150m	root	1.98381	1.0726e-07	5.43005e-07
	Cystine, L- (4TMS)	E3d_H150m vs W3d_H150m	root	1.57656	8.01537e-06	2.95112e-05
	Glucose-6-phosphate (1MEOX) (6TMS)	E3d_H150m vs W3d_H150m	root	5.58335	3.1308e-09	2.53594e-08
	Trehalose, alpha,alpha'-, D- (8TMS)	E3d_H150m vs W3d_H150m	root	3.10032	8.82003e-18	3.57211e-16
	Isomaltose (1MEOX) (8TMS)	E3d_H150m vs W3d_H150m	root	1.19546	8.22932e-05	0.00026663
	Glucose	E3d_H150m vs W3d_H150m	root	3.11004	8.77151e-15	1.77623e-13
	Sucrose	E3d_H150m vs W3d_H150m	root	5.52037	9.65044e-21	7.81686e-19
	Putrescine	E3d_H150m vs W3d_H150m	root	1.00762	0.00124943	0.00306679
	Fructose-6-phosphate	E3d_H150m vs W3d_H150m	root	2.2713	1.29043e-09	1.30656e-08
	Glycolic acid (2TMS)	E3d_H150m vs W3d_H150m	root	-1.21608	3.19666e-05	0.000107887
	Oxalic acid (2TMS)	E3d_H150m vs W3d_H150m	root	-1.26827	9.17637e-08	4.95524e-07
	Alanine, 3-cyano-, L- (2TMS)	E3d_H150m vs W3d_H150m	root	-1.99642	7.11677e-08	4.4343e-07
	Asparagine, DL- (3TMS)	E3d_H150m vs W3d_H150m	root	-1.41211	2.15032e-08	1.45147e-07
	Glutamine, DL- (3TMS)	E3d_H150m vs W3d_H150m	root	-1.05499	2.69517e-06	1.14899e-05
	Citric acid (4TMS)	E3d_H150m vs W3d_H150m	root	-1.68997	1.83254e-06	8.24642e-06
	Isoleucine	E3d_H150m vs W3d_H150m	root	-1.47642	7.02916e-10	8.13375e-09
	Saccharic acid (6TMS)	E3d_H150m_MGF vs W3d_H150m_MGF	mature green fruit	-1.07585	0.000490619	0.0129196
	Quinic acid, 3-caffeoyl-, trans- (6TMS)	E3d_H150m_L vs W3d_H150m_L	leaf at mature green fruit stage	1.5481	0.0113416	0.0493692
	Valine, DL- (2TMS)	E3d_H150m_L vs W3d_H150m_L	leaf at mature green fruit stage	-1.17818	3.22423e-09	1.19297e-07
	Leucine, DL- (2TMS)	E3d_H150m_L vs W3d_H150m_L	leaf at mature green fruit stage	-2.80541	9.16584e-05	0.00113045
	Methionine, DL- (2TMS)	E3d_H150m_L vs W3d_H150m_L	leaf at mature green fruit stage	-2.64638	7.9304e-08	1.95616e-06
	Asparagine, DL- (3TMS)	E3d_H150m_L vs W3d_H150m_L	leaf at mature green fruit stage	-1.22532	0.00642373	0.0365659
	Lysine, L- (4TMS)	E3d_H150m_L vs W3d_H150m_L	leaf at mature green fruit stage	-3.21612	5.42804e-07	1.00419e-05
	Tyrosine, DL- (3TMS)	E3d_H150m_L vs W3d_H150m_L	leaf at mature green fruit stage	-1.80826	0.000171183	0.00180965
	Saccharic acid (6TMS)	E3d_H150m_L vs W3d_H150m_L	leaf at mature green fruit stage	-1.0977	0.00761488	0.0379169
	Nicotianamine (4TMS)	E3d_H150m_L vs W3d_H150m_L	leaf at mature green fruit stage	-1.57958	0.00333312	0.0246651
	Isoleucine	E3d_H150m_L vs W3d_H150m_L	leaf at mature green fruit stage	-1.64464	9.16318e-13	6.78076e-11
	Tryptophan	E3d_H150m_L vs W3d_H150m_L	leaf at mature green fruit stage	-1.70294	0.00456209	0.0306904
	Putrescine	E3d_H150m_MRF vs W3d_H150m_MRF	mature red fruit	1.2665	0.00014888	0.0114638
